# Supplementary material for: Lineage-specific differences and regulatory networks governing human chondrocyte development
Source: eLife. 2023 Mar 15;12:e79925. doi: 10.7554/eLife.79925 (PMC10069868; doi:10.7554/eLife.79925)
Supplement: Supplementary file 1. — (a) Quality summary statistics for RNA-seq samples. (b) DEG data for hESC-derived (in vitro) and fetal (primary) chondrocyte samples. Columns C-H: DESeq2 statistics for hESC-derived samples. Log2FC is calculated as BMP-vs-TGF. Columns I-N: DESeq2 statistics for primary fetal samples. Log2FC is calculated as Growth plate vs. epiphyseal (GP-vs-EP). Columns O-AG: Normalized transcript counts for the indicated gene in the indicated sample. (c) DEG gene-set enrichments. The (up to) top 30 significantly-enriched gene sets obtained using sets of genes up-regulated in the given tissue. (d) Testing shared direction of differential expression between primary and in vitro hESC-derived samples. (e) Differential expression information for differentially expressed in at least one of four cell types. Column ‘A’ denotes the classification of different TFs. (f) Differential expression analysis run only on ‘Batch 2’ samples, for which paired ATAC-seq libraries were generated. (g) Sets of that were DEG in the Batch 2 analysis. [file elife-79925-supp1.xlsx]

## Sheet: supplementary file 1a
Batch	Batch Facility	Experiment	Treatment Type	Sequencing ID	Sample Name	Description	Library kit	Illumina Tru-Seq index accession	Reads	% Bases >= Q30
1	BPF	SP46	BMP4	LIB045671_TRA00176084_S4	H9_B_44_rep1	HESC-derived growth plate chondrocytes	Tru-Seq (Illumina)	AR009 (GATCAG	190148564	0.855277
1	BPF	SP46	BMP4	LIB045671_TRA00176085_S5	H9_B_44_rep2	HESC-derived growth plate chondrocytes	Tru-Seq (Illumina)	AR010 (TAGCTT)	129550270	0.859389
1	BPF	SP46	BMP4	LIB045671_TRA00176086_S6	H9_B_44_rep3	HESC-derived growth plate chondrocytes	Tru-Seq (Illumina)	AR011 (GGCTAC)	430001344	0.841945
1	BPF	SP46	TGFB3	LIB045671_TRA00176081_S1	H9_T_44_rep1	HESC-derived articular chondrocytes	Tru-Seq (Illumina)	AR001 (ATCACG)	98110018	0.85933
1	BPF	SP46	TGFB3	LIB045671_TRA00176082_S2	H9_T_44_rep2	HESC-derived articular chondrocytes	Tru-Seq (Illumina)	AR003 (TTAGGC)	160517706	0.846414
1	BPF	SP46	TGFB3	LIB045671_TRA00176083_S3	H9_T_44_rep3	HESC-derived articular chondrocytes	Tru-Seq (Illumina)	AR008 (ACTTGA)	176907660	0.86226
Batch	Batch Facility	Experiment	Treatment Type	Sequencing ID	Sample Name	Description	Library kit	Indices (forward + reverse)	Reads	% Bases >= Q30
2	Bauer	SP25	BMP4	BMP3_BR1	H9_B_25_rep1	HESC-derived growth plate chondrocytes	Kappa (Roche)	TCCAACGC+AAGTCCAA	49795312	95.02
2	Bauer	SP28	BMP4	BMP1_BR2_E2	H9_B_28_rep1	HESC-derived growth plate chondrocytes	Kappa (Roche)	CGGACAAC+AATCCGGA	49695230	95.18
2	Bauer	SP30	BMP4	BMP3_BR3	H9_B_30_rep1	HESC-derived growth plate chondrocytes	Kappa (Roche)	AATCCGGA+AACTGTAG	53065234	95.3
2	Bauer	SP25	TGFB3	1_TGF1	H9_T_25_rep1	HESC-derived articular chondrocytes	Kappa (Roche)	TATCGCAC+ACACTAAG	50986920	95.35
2	Bauer	SP28	TGFB3	2_TGF1	H9_T_28_rep1	HESC-derived articular chondrocytes	Kappa (Roche)	CAACAATG+CCGTGAAG	51266024	95.41
2	Bauer	SP30	TGFB3	3_TGF_2	H9_T_30_rep1	HESC-derived articular chondrocytes	Kappa (Roche)	ACACTAAG+ATATGGAT	48275434	93.17
Batch	Batch Facility	Experiment	Treatment Type	Sequencing ID	Sample Name	Description	Library kit	Barcode Sequence	Reads	% Bases >= Q30
3	Genewiz	Fetal dissection	n/a	28743-GP-Right2	28743-GP-Right2	Fetal growth plate chondrocytes	Tru-Seq (Illumina)	AGTCAA	72882134	94.35
3	Genewiz	Fetal dissection	n/a	28743-GP-Right1	28743-GP-Right1	Fetal growth plate chondrocytes	Tru-Seq (Illumina)	ACAGTG	37606416	94.56
3	Genewiz	Fetal dissection	n/a	28743-GP-Left2	28743-GP-Left2	Fetal growth plate chondrocytes	Tru-Seq (Illumina)	CTTGTA	35062000	94.03
3	Genewiz	Fetal dissection	n/a	28743-EP-Left2	28743-EP-Left2	Fetal epiphyseal cartilage chondrocytes	Tru-Seq (Illumina)	GCCAAT	51305698	94.61
3	Genewiz	Fetal dissection	n/a	28743-EP-Right1	28743-EP-Right1	Fetal epiphyseal cartilage chondrocytes	Tru-Seq (Illumina)	TGACCA	41917336	94.9
3	Genewiz	Resequenced batch 2 sample	TGFB3	SP46-T3	SP46-T3	HESC-derived articular chondrocytes	Tru-Seq (Illumina)	ACTTGA	53844165	94.87
3	Genewiz	Fetal dissection	n/a	28743-EP-Right2	28743-EP-Right2	Fetal epiphyseal cartilage chondrocytes	Tru-Seq (Illumina)	CAGATC	41176311	94.91
3	Genewiz	Fetal dissection	n/a	28743-EP-Left1	28743-EP-Left1	Fetal epiphyseal cartilage chondrocytes	Tru-Seq (Illumina)	CGATGT	45744747	94.91
3	Genewiz	Resequenced batch 2 sample	BMP4	SP46-B1	SP46-B1	HESC-derived growth plate chondrocytes	Tru-Seq (Illumina)	GATCAG	60473054	94.71
Batch	Batch Facility	Experiment	Treatment Type	Sequencing ID	Sample Name	Description	Library kit	Barcode Sequence	Reads	% Bases >= Q30
4	Genewiz (Azenta Life Sciences)	RR2	BMP4	RR2_4wB	RR2_4wB	HESC-derived growth plate chondrocyte progenitors after 4 weeks of differentiation	NEBNext Ultra II RNA Library Prep Kit for Illumina		34787943
4	Genewiz (Azenta Life Sciences)	RR4	BMP4	RR4_4wB	RR4_4wB	HESC-derived growth plate chondrocyte progenitors after 4 weeks of differentiation	NEBNext Ultra II RNA Library Prep Kit for Illumina		33535028
4	Genewiz (Azenta Life Sciences)	RR22	BMP4	RR22_4wB	RR22_4wB	HESC-derived growth plate chondrocyte progenitors after 4 weeks of differentiation	NEBNext Ultra II RNA Library Prep Kit for Illumina		25799344
4	Genewiz (Azenta Life Sciences)	RR2	TGFB3	RR2_4wT	RR2_4wT	HESC-derived articular chondrocyte progenitors after 4 weeks of differentiation	NEBNext Ultra II RNA Library Prep Kit for Illumina		32228012
4	Genewiz (Azenta Life Sciences)	RR4	TGFB3	RR4_4wT	RR4_4wT	HESC-derived articular chondrocyte progenitors after 4 weeks of differentiation	NEBNext Ultra II RNA Library Prep Kit for Illumina		27076001
4	Genewiz (Azenta Life Sciences)	RR22	TGFB3	RR22_4wT	RR22_4wT	HESC-derived articular chondrocyte progenitors after 4 weeks of differentiation	NEBNext Ultra II RNA Library Prep Kit for Illumina		36278861
4	Genewiz (Azenta Life Sciences)	RR2	BMP4	RR2_8wB	RR2_8wB	HESC-derived growth plate chondrocyte progenitors after 8 weeks of differentiation	NEBNext Ultra II RNA Library Prep Kit for Illumina		51237327
4	Genewiz (Azenta Life Sciences)	RR4	BMP4	RR4_8wB	RR4_8wB	HESC-derived growth plate chondrocyte progenitors after 8 weeks of differentiation	NEBNext Ultra II RNA Library Prep Kit for Illumina		32954612
4	Genewiz (Azenta Life Sciences)	RR22	BMP4	RR22_8wB	RR22_8wB	HESC-derived growth plate chondrocyte progenitors after 8 weeks of differentiation	NEBNext Ultra II RNA Library Prep Kit for Illumina		32782045
4	Genewiz (Azenta Life Sciences)	RR2	TGFB3	RR2_8wT	RR2_8wT	HESC-derived articular chondrocyte progenitors after 8 weeks of differentiation	NEBNext Ultra II RNA Library Prep Kit for Illumina		33972249
4	Genewiz (Azenta Life Sciences)	RR4	TGFB3	RR4_8wT	RR4_8wT	HESC-derived articular chondrocyte progenitors after 8 weeks of differentiation	NEBNext Ultra II RNA Library Prep Kit for Illumina		43017641
4	Genewiz (Azenta Life Sciences)	RR22	TGFB3	RR22_8wT	RR22_8wT	HESC-derived articular chondrocyte progenitors after 8 weeks of differentiation	NEBNext Ultra II RNA Library Prep Kit for Illumina		28310081
4	Genewiz (Azenta Life Sciences)	RR2	BMP4	RR2_12wB	RR2_12wB	HESC-derived growth plate chondrocytes after 12 weeks of differentiation	NEBNext Ultra II RNA Library Prep Kit for Illumina		88907469
4	Genewiz (Azenta Life Sciences)	RR4	BMP4	RR4_12wB	RR4_12wB	HESC-derived growth plate chondrocytes after 12 weeks of differentiation	NEBNext Ultra II RNA Library Prep Kit for Illumina		34710297
4	Genewiz (Azenta Life Sciences)	RR22	BMP4	RR22_12wB	RR22_12wB	HESC-derived growth plate chondrocytes after 12 weeks of differentiation	NEBNext Ultra II RNA Library Prep Kit for Illumina		35330988
4	Genewiz (Azenta Life Sciences)	RR2	TGFB3	RR2_12wT	RR2_12wT	HESC-derived articular chondrocytes after 12 weeks of differentiation	NEBNext Ultra II RNA Library Prep Kit for Illumina		39867274
4	Genewiz (Azenta Life Sciences)	RR22	TGFB3	RR22_12wT	RR22_12wT	HESC-derived articular chondrocytes after 12 weeks of differentiation	NEBNext Ultra II RNA Library Prep Kit for Illumina		29332111

## Sheet: supplementary file 1b
symbol	baseMean	log2FoldChange	lfcSE	stat	pvalue	padj	PRIMARY_baseMean	PRIMARY_log2FoldChange	PRIMARY_lfcSE	PRIMARY_stat	PRIMARY_pvalue	PRIMARY_padj	H9_B_25_rep1	H9_B_28_rep1	H9_B_30_rep1	H9_B_44_rep1	H9_B_44_rep2	H9_B_44_rep3	H9_T_25_rep1	H9_T_28_rep1	H9_T_30_rep1	H9_T_44_rep1	H9_T_44_rep2	H9_T_44_rep3	D28743_EP_Left1	D28743_EP_Left2	D28743_EP_Right1	D28743_EP_Right2	D28743_GP_Left2	D28743_GP_Right1	D28743_GP_Right2
PRG4	23739.9	-6.70698	0.198711	-33.7697	5.5e-250	1.33e-245	5398.73	-4.53319	0.482858	-9.41711	4.64e-21	5.11e-19	976.116	844.638	817.868	122.679	159.68	127.77	75872.7	84871	58667.6	16896.9	25641.9	19879.5	547.976	416.585	1805.81	1574.03	80.7507	15.5869	24.5614
SESN1	14289.1	4.84457	0.161125	30.064	1.43e-198	1.73e-194	5399.14	0.378074	0.196401	1.91931	0.0549448	0.155559	32782.2	34968.9	32821.7	16972.2	25036.2	23284.7	833.919	1169.33	1401.36	587.071	843.072	769.074	848.894	841.694	733.925	797.935	1314.55	969.507	867.018
DEPTOR	1575.67	5.94765	0.213018	27.8382	1.5e-170	1.2e-166	557.087	-0.952084	0.321129	-2.9799	0.00288341	0.0153212	3592.72	3171.96	5202.71	1584.74	2553.2	2520.36	55.6874	59.1234	66.8615	32.0429	23.7309	44.9267	128.798	188.582	190.417	163.185	138.966	54.5543	66.3158
SP7	3525.35	8.08406	0.292626	27.4207	1.55e-165	9.37e-162	1365.31	5.20851	0.433377	12.0198	2.79e-33	1.04e-30	9148.92	7507.58	11729.4	3354.29	5548.47	4857.54	38.9812	28.9048	64.1325	11.4439	6.86947	7.68483	97.1838	102.282	23.9598	33.4079	3793.41	2232.05	2089.36
PANX3	11923.7	11.9237	0.402946	26.9971	1.6e-160	7.71e-157	3780.41	9.88978	0.566367	16.9598	1.63e-64	3.99e-61	31842.9	26467.7	48249.5	8070.27	15324.3	13112.9	4.17656	2.62771	0	4.57755	3.12249	2.36456	4.68356	3.19631	7.56624	7.70952	17254.4	2905.4	4218.83
PDE4DIP	24037.1	2.56292	0.0979946	26.1549	8.67e-151	3.48e-147	19033.9	1.20947	0.152376	7.94538	1.94e-15	1.16e-13	48901.9	51427.4	44029.9	31303.4	35144	35273.7	9416.75	9404.56	8110.71	5042.17	5112.14	5278.89	17934.5	16862.7	15148.9	14113.6	48512.4	31367.1	31711.2
SLC29A1	8362.03	-3.01437	0.117131	-25.7371	4.5e-146	1.55e-142	7060.98	-0.602128	0.199111	-3.02524	0.00248435	0.0135704	1215.29	1068.1	1202.95	2887.48	2607.83	2340.57	11258.6	9856.52	10897.1	21495	18831.1	16683.8	4464.6	5588.21	6506.97	7361.3	5008.42	3496.15	3283.86
COL10A1	233410	8.59932	0.339115	25.4297	1.18e-142	3.57e-139	97785	1.7919	0.494081	3.58159	0.000341506	0.00258424	423802	416082	707244	259376	540350	447762	2664.64	693.714	1349.51	355.904	638.861	601.19	32.7849	82.0386	45.3974	68.1007	446.946	107.55	69.5907
SAMHD1	6451.28	4.49776	0.177476	25.3402	1.15e-141	3.09e-138	2853.6	-1.01821	0.206888	-4.95219	7.34e-07	1.13e-05	13985.5	14436.1	10948.7	11072.5	12149.2	11644.1	332.732	458.535	649.512	489.798	623.873	624.836	251.741	171.535	277.429	249.274	165.257	87.2868	100.702
CXCL13	21350.3	9.37367	0.371137	25.1667	9.27e-140	2.24e-136	4709.38	-0.0789979	0.756613	-0.327651	0.743176	0.871956	38490.7	36544.3	101477	9245.02	39705.8	30484	44.55	28.9048	69.5906	46.9199	41.8413	24.8279	2.34178	2.13087	0	6.4246	5.63377	0	1.63743
IRF6	4356.91	7.4783	0.297778	25.0601	1.36e-138	2.97e-135	1170.65	0.648175	0.453708	1.44228	0.149223	0.317945	10931.5	10305.7	12340.1	4086.65	7543.63	6838.55	26.4515	24.9632	31.384	42.3423	52.4578	59.1141	154.557	141.703	187.895	143.911	557.743	115.343	85.965
EFHD1	6044.64	3.74172	0.151364	24.718	6.86e-135	1.38e-131	2276.86	0.983543	0.355395	2.74614	0.00603004	0.0280401	13108.6	11358.3	14564.6	7392.08	11312.1	9839.45	808.86	1014.29	1061.6	827.392	684.449	563.948	140.507	184.32	182.851	222.291	679.808	160.545	257.895
FGD4	1543.69	4.65364	0.18858	24.6539	3.34e-134	6.2e-131	743.139	1.08844	0.338941	3.20866	0.00133355	0.00811691	3911.62	4450.86	2767.72	1943.75	2306.96	2476.26	128.081	157.662	102.339	73.2408	123.651	82.1685	469.526	344.136	221.943	182.459	433.8	715.44	821.17
FGFR3	26742.4	3.91421	0.160713	24.3549	5.14e-131	8.86e-128	29597.6	1.73115	0.267179	6.51109	7.46e-11	2.45e-09	58597.6	50419.7	44538.3	45177.8	49171.5	53483.8	2961.18	3458.06	3060.62	2499.34	2920.78	4619.76	27750.1	27098.3	15386	15302.1	73640.9	76798.4	67109.2
FBLN5	15088.3	-3.0285	0.125588	-24.1144	1.76e-128	2.84e-125	8355.56	-1.76785	0.302102	-5.89265	3.8e-09	9.2e-08	2953.9	2446.78	3256.35	4359.63	3162.51	3453.19	21732	24386.4	28178.7	27246.7	30576.6	29306.4	754.052	884.312	1525.86	1896.54	497.65	288.358	298.831
TNMD	4126.81	-6.36	0.264688	-23.976	4.95e-127	7.45e-124	2885.27	-2.08906	0.593018	-3.64615	0.000266199	0.00208848	161.494	186.917	123.32	35.0512	27.7339	19.2221	12327.8	8138	20336.8	2764.84	1701.76	3698.77	15.2216	42.6174	163.935	212.012	18.7792	9.35216	34.386
ST3GAL5	1332.1	3.48368	0.145752	23.8923	3.68e-126	5.22e-123	736.027	0.206851	0.169136	1.22259	0.221483	0.415206	3407.72	2917.59	2953.86	1612.36	1911.12	1909.77	217.181	240.435	316.569	127.027	171.737	199.806	539.78	590.251	506.938	542.236	666.663	604.773	618.129
GPR133	1527.17	6.34707	0.266623	23.7188	2.31e-124	3.09e-121	480.073	1.04401	0.310352	3.34979	0.000808724	0.00531419	3454.74	2487.54	5892.6	1480.12	2567.49	2222.98	55.6874	45.9849	68.2261	14.877	17.4859	18.3254	50.3482	63.9261	80.7066	101.509	200.938	101.315	160.468
SCNN1A	3330.91	2.67699	0.113644	23.5546	1.13e-122	1.43e-119	1044.19	0.15251	0.278997	0.529837	0.596225	0.771157	5466.25	5136.69	7147.91	5153.06	5752.69	5945.28	864.547	956.485	948.342	897.2	929.877	772.621	91.3293	51.1409	34.0481	59.1063	71.3611	37.4086	84.3275
HERC1	9111.91	2.53033	0.108102	23.4065	3.67e-121	4.42e-118	6160.18	-0.222805	0.18062	-1.2394	0.215197	0.407791	18462.4	15563.3	17463.7	11316.2	15062.1	15463.6	3093.44	2731.5	2853.21	2267.03	2563.56	2502.89	3068.9	2064.81	3153.86	2118.83	1917.36	2358.3	2397.19
CCDC85A	1256.04	4.75506	0.204168	23.262	1.08e-119	1.24e-116	718.196	2.69693	0.307499	8.76145	1.93e-18	1.63e-16	2652.38	2656.18	2239.54	1824.26	2684.31	2501.13	129.473	68.3204	85.9648	50.353	104.291	76.2571	81.9622	108.674	94.578	86.0896	952.108	458.256	457.661
CAPN14	1365.75	6.14575	0.263393	23.2187	2.95e-119	3.23e-116	734.902	1.2283	0.386803	3.16476	0.0015521	0.00923054	1542.37	1198.8	2600.19	2659.64	4080.25	4110.14	19.4906	35.474	27.2904	24.0321	48.7108	42.5621	12.8798	13.8507	12.6104	11.5643	46.9481	14.0282	31.9298
LEPREL1	14098.9	3.32439	0.144299	23.0374	1.97e-117	2.06e-114	9093.42	2.48026	0.317944	7.78459	6.99e-15	3.98e-13	19137	21245.3	21722.9	22799.7	34258.2	34923.2	2160.67	2312.38	1696.1	2613.78	3434.11	2883.58	521.045	675.486	747.797	1096.04	6702.31	2917.87	3462.34
CHI3L1	8358.03	-7.55832	0.32901	-22.9846	6.64e-117	6.67e-114	3949	-3.90146	0.400981	-9.5899	8.82e-22	1.04e-19	18.398	33.7293	30.2483	199.686	132.787	113.071	16102	5510.3	10214.8	29115.5	24905.6	13920.2	148.703	217.349	189.156	192.738	20.6572	7.79347	7.36843
GPRIN3	360.701	6.15012	0.267651	22.5181	2.76e-112	2.66e-109	127.534	-0.1582	0.482453	-0.367588	0.71318	0.852734	891.281	983.772	967.946	338.297	518.541	573.271	12.5297	9.19697	19.1033	2.28877	6.86947	5.32027	19.9051	12.7852	27.7429	11.5643	0	23.3804	21.2866
GPRC5B	1519.29	3.46414	0.158892	21.7975	2.45e-105	2.27e-102	1313.54	0.186116	0.139417	1.33602	0.181542	0.363578	3446.56	2661.8	2587.39	2582.11	2682.63	2778.16	165.67	270.654	203.314	290.674	284.146	278.427	1250.51	1409.57	1117.28	1075.48	1102.34	1521.28	1512.98
CRTAC1	3048.18	-2.99779	0.137757	-21.7597	5.59e-105	5e-102	1663.32	-0.531024	0.170927	-3.10164	0.00192449	0.010966	599.979	647.884	756.208	631.984	677.381	708.956	6668.57	4224.04	5013.25	5977.14	4764.29	5908.45	824.306	1016.43	621.693	782.516	508.917	614.125	559.182
PCSK6	4616.41	4.91894	0.226348	21.7348	9.61e-105	8.28e-102	2497.07	3.40782	0.373713	9.10588	8.56e-20	8.54e-18	9807.16	8661.41	6634.85	8416	10244.8	9922	303.497	323.208	427.095	192.257	311.624	153.105	112.405	119.329	229.509	132.347	3004.68	830.783	1169.94
FST	7472.55	7.07079	0.331689	21.3329	5.62e-101	4.67e-98	2429.59	-0.78836	0.405955	-2.02168	0.0432089	0.129957	21588	20788.5	9873.74	8139.84	15773.9	12898	218.573	77.5173	156.92	77.8183	49.9598	27.7836	19.9051	45.8137	50.4416	53.9666	31.9247	23.3804	17.193
ATOH8	4172.12	4.33989	0.206917	20.9729	1.16e-97	9.32e-95	2250.94	1.41062	0.241732	5.84163	5.17e-09	1.22e-07	10441.9	8204.66	8503.26	5856.74	7345.3	7466.09	293.751	294.303	421.637	574.482	367.205	296.161	996.426	1239.1	686.006	799.22	2407.5	2727.71	2370.18
HOMER2	1802.48	4.45841	0.213375	20.8854	7.27e-97	5.65e-94	669.661	2.50986	0.371705	6.74433	1.54e-11	5.54e-10	4151.82	3995.52	4370.88	2047.84	3399.51	2787.2	151.748	160.29	90.0584	145.337	181.729	147.785	134.652	116.132	74.4014	78.3801	1074.17	277.447	452.749
LPAR3	5982.81	6.99628	0.337889	20.7853	5.88e-96	4.43e-93	1913.66	0.300242	0.232655	1.28988	0.197091	0.383949	12207.1	12083.5	18052.4	6849.85	11852.5	10256.7	44.55	47.2987	28.6549	115.583	136.141	119.41	115.918	106.544	134.931	131.062	189.67	120.019	144.094
PTH1R	28336.5	4.68329	0.225875	20.7317	1.79e-95	1.31e-92	10574.6	2.57863	0.345921	7.45699	8.85e-14	4.42e-12	67128.2	56031.4	83947.2	30674.6	44966.8	45555.2	2490.62	2401.72	1668.81	2612.64	1190.92	1370.26	1453.07	1932.7	1278.69	1346.6	16242.2	5726.64	6051.93
ALPL	2177.95	9.20493	0.428067	20.5576	6.58e-94	4.67e-91	714.089	1.66814	0.516848	3.20994	0.00132761	0.00808744	3550.82	3135.42	9508.44	2750.99	3529.78	3631.85	8.35312	0	9.55165	4.57755	5.62048	0	15.2216	15.9815	16.3935	46.2571	118.309	20.263	96.6082
SEPP1	1848.02	4.20195	0.205632	20.435	8.17e-93	5.63e-90	1501.01	2.43191	0.295758	8.22007	2.03e-16	1.37e-14	3575.34	2805.16	3266.82	3377.66	3973.52	4050.21	274.261	252.26	180.117	125.883	166.741	128.278	539.78	459.203	177.807	287.822	2555.86	1829.91	1705.38
C5AR2	4977.07	4.87651	0.239997	20.3387	5.85e-92	3.92e-89	3068.38	3.93633	0.587534	6.4484	1.13e-10	3.61e-09	4579.06	3821.25	6478.95	12381	13542.6	16789.9	133.65	63.0649	154.191	524.129	580.783	676.265	2.34178	2.13087	3.78312	2.56984	118.309	7.79347	43.3918
IL17B	3666.57	7.54699	0.370293	20.3319	6.71e-92	4.37e-89	1562.07	4.59267	0.718524	6.36291	1.98e-10	6.08e-09	8037.88	7258.83	6327.71	4173.22	9395.09	8610.37	13.9219	26.2771	9.55165	89.2622	21.2329	35.4684	32.7849	55.4027	2.52208	3.85476	1284.5	637.505	506.784
RP5-1185I7.1	319.727	4.85304	0.239493	20.1538	2.49e-90	1.58e-87	106.297	-0.483922	0.819009	-0.719162	0.472041	0.67259	754.318	621.182	851.606	395.654	563.924	517.866	37.589	34.1602	25.9259	13.7326	12.49	8.27597	1.17089	0	6.3052	1.28492	0	1.55869	1.63743
LGI4	5055.24	6.97846	0.347854	20.1094	6.11e-90	3.78e-87	2372.53	0.549968	0.325121	1.68169	0.0926288	0.227633	11799.2	9830.69	9908.65	7085.12	11597.8	10010.2	27.8437	55.1818	19.1033	173.947	79.9357	75.0748	269.304	259.966	226.987	245.42	531.452	308.621	269.357
RCAN2	680.834	5.67187	0.282981	19.9621	1.18e-88	7.1e-86	314.174	0.881099	0.573464	1.48288	0.138106	0.301633	1678.31	1907.11	1056.36	1244.85	1199.28	926.053	48.7265	45.9849	25.9259	10.2995	9.36746	17.7342	4.68356	28.7668	1.26104	7.70952	39.4364	12.4695	11.462
ITGA8	945.723	4.96515	0.249191	19.9185	2.81e-88	1.65e-85	318.005	3.42153	0.505786	6.73397	1.65e-11	5.93e-10	2827.16	2972.4	1663.66	1150.32	1211.89	1134.1	108.59	134.013	79.1422	21.7434	24.9799	20.6899	8.19622	7.45805	37.8312	12.8492	339.904	151.193	106.433
PHOSPHO1	4655.09	5.1516	0.260132	19.7967	3.18e-87	1.82e-84	1765.06	6.77499	0.570274	11.7943	4.18e-32	1.42e-29	10929.4	8904.54	18072.2	4528.51	6347.71	5658.08	293.751	461.162	244.249	217.434	122.401	81.5774	22.2469	5.32718	18.9156	19.2738	5598.09	759.083	921.053
ENPP2	7337.71	3.2831	0.166508	19.7174	1.53e-86	8.58e-84	6317.46	-1.11732	0.215345	-5.18876	2.12e-07	3.61e-06	13521.5	14152.3	12162.1	11070.9	14044.3	15020.4	1772.25	1116.77	1566.47	913.221	1265.23	1447.11	5763.11	6783.63	7828.54	9126.78	4215.94	2867.99	3053.8
GBGT1	609.366	-3.19159	0.161838	-19.7109	1.74e-86	9.53e-84	310.74	-0.731222	0.406054	-1.89344	0.0582989	0.162341	93.0121	112.431	101.216	162.51	122.702	117.594	906.313	1150.93	1000.19	1493.43	1088.5	963.559	17.5633	14.9161	16.3935	35.9778	18.7792	14.0282	6.54971
TSPAN13	2714.07	4.02471	0.204375	19.6873	2.77e-86	1.48e-83	1939.15	2.08012	0.333715	6.24478	4.24e-10	1.23e-08	5700.31	5632.8	7268.9	2788.69	5231.63	4135.01	219.965	412.55	455.75	225.444	266.036	231.727	994.085	1326.47	657.002	736.259	6717.33	2666.92	2780.35
INADL	4437.8	3.76355	0.192404	19.5585	3.49e-85	1.83e-82	2766.95	-0.287963	0.235838	-1.22331	0.221212	0.414949	8468.19	6677	5115.45	7220.02	10370.8	11915.4	584.718	700.284	473.489	591.648	593.273	543.258	694.337	541.241	566.207	732.404	364.317	481.636	699.182
CAMK2G	2922.2	2.38744	0.12261	19.471	1.94e-84	9.93e-82	1750.18	1.06587	0.178684	5.96257	2.48e-09	6.21e-08	6245.1	5360.15	4520.96	3691	4920.68	4735.42	987.06	1086.56	1037.04	731.264	878.668	872.523	859.432	972.743	794.455	647.599	2095.76	1568.05	1505.62
ATP8B4	1109.54	6.89725	0.354408	19.3408	2.44e-83	1.22e-80	322.47	2.76747	0.649837	4.14314	3.43e-05	0.000349329	2205.72	3021.58	3783.36	997.897	1707.74	1477.84	34.8046	43.3571	31.384	1.14439	4.37148	5.32026	2.34178	3.19631	0	2.56984	33.8026	21.8217	3.27486
COL15A1	5801.75	-6.40293	0.335194	-19.1306	1.4e-81	6.91e-79	29819.1	0.0335943	0.253025	0.162421	0.870975	0.943053	131.852	64.6479	43.0457	150.826	138.67	154.907	18016.3	14991.1	8490.05	5402.65	10313	11724.1	64001.9	62680.7	57110	54627.1	50995	69890.2	63154.8
CTC-558O2.1	1087.33	6.5859	0.343517	19.0404	7.89e-81	3.8e-78	228.797	1.20523	0.774472	1.54749	0.121745	0.276244	2511.33	2592.94	4290.6	876.28	1309.38	1371.55	15.314	18.3939	6.82261	22.8878	21.2329	11.2317	2.34178	0	1.26104	1.28492	5.63377	1.55869	3.27486
PRKG2	1069.72	4.37923	0.229942	19.0194	1.18e-80	5.57e-78	1240.84	2.38128	0.410284	5.84566	5.05e-09	1.19e-07	2652.38	2688.51	3811.29	808.833	1161.46	1174.81	71.0015	181.312	135.088	35.476	56.2048	60.2963	1495.22	1092.07	394.705	316.09	4674.15	4493.71	4565.15
RUNX2	3829.68	3.65475	0.194516	18.7931	8.6e-79	3.99e-76	2503.29	2.70916	0.41034	6.62512	3.47e-11	1.2e-09	10057.6	10016.2	8738.27	3492.9	5377.86	4829.27	955.04	955.171	618.128	204.845	327.861	383.059	1540.89	1283.85	520.81	331.509	8458.17	4950.41	5842.34
SLC8A3	3595.08	8.31435	0.441955	18.7417	2.26e-78	1.03e-75	1237.03	5.49146	0.471238	11.6429	2.49e-31	8.09e-29	8900.55	7326.29	15893.2	2464.74	4363.47	4120.31	5.56874	7.88312	8.18713	28.6097	16.8614	5.32026	50.3482	50.0755	49.1806	42.4023	4860.07	1250.07	1476.14
RCL1	4622.21	4.1559	0.222634	18.6663	9.31e-78	4.16e-75	2236.48	0.623698	0.263699	2.36282	0.0181367	0.0664852	8282.17	8766.81	11239.6	5076.58	10281.7	9002.73	335.517	470.359	457.115	712.953	427.781	413.207	701.362	661.636	590.167	564.08	1077.93	910.277	936.609
PLP2	3043.14	-2.80531	0.152341	-18.4123	1.05e-75	4.59e-73	2925.71	-0.675054	0.205877	-3.27893	0.00104203	0.00655912	445.641	414.59	591.005	1043.57	1059.77	898.916	3834.08	2690.77	3378.55	9134.5	6206.88	6819.4	1887.47	2601.79	2662.06	3357.49	1966.19	1477.64	1478.6
ALPK2	4375.67	3.89114	0.213575	18.2206	3.54e-74	1.53e-71	1491.96	1.48813	0.366109	4.04394	5.26e-05	0.000505556	11578.5	10666.9	6316.08	6659.73	6621.69	7397.12	499.795	618.825	975.633	307.84	375.323	490.647	12.8798	10.6544	15.1325	16.7039	76.9949	21.8217	26.1989
ACSM5	147.805	3.79214	0.207578	18.1734	8.38e-74	3.55e-71	44.2376	1.30541	0.520364	2.4961	0.0125568	0.0499506	403.734	288.105	301.32	199.686	258.85	204.659	23.6672	19.7078	30.0195	16.0214	13.1144	14.7785	1.17089	10.6544	5.04416	0	11.2675	9.35216	13.0994
PLXDC1	517.998	-3.86217	0.215598	-17.8939	1.32e-71	5.47e-69	313.769	-1.95728	0.441354	-4.46089	8.16e-06	9.85e-05	99.1448	85.7287	74.4574	49.3903	46.2233	36.1828	1733.27	726.561	1158.48	810.226	675.706	720.6	192.026	168.339	266.079	236.425	120.187	23.3804	18.0117
NRCAM	1864.57	5.20971	0.29273	17.8212	4.83e-71	1.98e-68	1282.06	2.64694	0.363299	7.30623	2.75e-13	1.27e-11	4677.18	5060.8	5201.54	2096.7	2446.47	2259.16	115.551	244.377	166.472	12.5883	43.7148	50.2469	497.628	670.159	467.846	578.214	6287.29	2006.04	2635.44
TRIM36	628.118	4.93733	0.276513	17.8178	5.15e-71	2.07e-68	250.457	0.661721	0.305931	2.15265	0.0313461	0.101566	1188.71	1267.66	2509.45	535.858	869.837	926.053	47.3343	49.9264	90.0584	14.877	18.7349	18.9165	42.152	35.1594	61.791	33.4079	93.8962	54.5543	59.7661
COMP	52603.7	-5.9699	0.335585	-17.7858	9.1e-71	3.6e-68	35362.5	0.778675	0.453853	1.74223	0.081469	0.207422	1862.29	2295	821.358	1914.54	540.392	693.126	167739	101884	146222	48472.8	53496.3	105304	18017.6	25910.3	31252.4	37391.2	82324.4	31214.4	35637.8
IBSP	13494.6	13.3197	0.501044	17.7677	1.26e-70	4.89e-68	3035.72	5.78841	0.990063	5.62788	1.82e-08	3.85e-07	21918.2	22005.6	68990.6	10724.1	21855.2	16438.3	0	0	1.36452	2.28877	0	0	1.17089	2.13087	0	1.28492	674.175	24.9391	88.4211
SLC16A10	710.216	5.68121	0.318651	17.7427	1.96e-70	7.51e-68	239.223	-0.623159	0.313597	-1.98522	0.0471197	0.138803	1517.84	1672.41	2243.03	592.684	1252.23	1110.36	12.5297	36.7879	12.2807	34.3316	16.2369	21.8722	73.766	108.674	97.1001	105.363	48.826	63.9064	71.2281
ADORA1	256.337	-5.45208	0.304287	-17.6538	9.52e-70	3.59e-67	237.574	-2.34185	0.404959	-5.75291	8.77e-09	1.99e-07	11.2432	8.43233	5.81698	14.8702	9.24465	6.78427	214.397	353.426	294.736	899.489	735.034	522.568	256.425	342.005	341.742	309.666	11.2675	90.4042	72.8655
SMPD3	2055.01	3.93873	0.223344	17.64	1.21e-69	4.5e-67	1654.32	1.13906	0.469948	2.45469	0.0141006	0.0547829	5154.51	4682.75	5533.11	1933.13	3199.49	2620.99	410.695	340.288	373.879	217.434	99.2951	94.5825	1285.64	1111.25	1186.64	1093.47	5421.57	1073.94	1574.39
NGF	455.512	-3.07152	0.174006	-17.6368	1.29e-69	4.7e-67	341.864	-1.34565	0.320172	-4.24413	2.19e-05	0.000236112	43.9508	36.5401	26.7581	171.007	142.872	152.646	339.693	341.602	276.998	1665.08	1032.92	1236.07	35.1267	54.3372	39.0922	69.3856	13.1455	23.3804	18.8304
PKN3	1407.43	-3.90606	0.222044	-17.5741	3.89e-69	1.4e-66	1053.49	-1.7669	0.329308	-5.3844	7.27e-08	1.38e-06	125.72	115.242	94.2351	234.737	171.446	189.96	1606.58	1139.11	1361.79	5786.02	3094.39	2969.89	289.209	302.584	503.155	620.616	157.746	104.432	106.433
VSTM2L	669.243	5.60905	0.318807	17.5067	1.27e-68	4.52e-66	179.137	3.57415	0.457746	7.71084	1.25e-14	6.87e-13	1562.81	1068.1	2816.58	421.145	1053.05	961.105	55.6874	22.3355	32.7485	13.7326	10.6165	13.0051	8.19622	3.19631	6.3052	8.99444	99.53	107.55	56.4913
TBC1D1	11142.6	1.90355	0.109004	17.4618	2.8e-68	9.79e-66	5436.62	1.13203	0.135524	8.35502	6.54e-17	4.62e-15	24194.4	22080.1	20789.9	12258.9	13224.1	13681.6	5078.69	5707.38	4732.16	3927.54	3962.44	4073.55	2837.06	3937.85	3039.11	3149.34	8617.79	6354.79	6406.44
BAALC	690.491	-4.0414	0.232181	-17.3835	1.1e-67	3.79e-65	968.744	-2.64569	0.242147	-10.9091	1.04e-27	2.32e-25	22.4865	68.864	69.8038	81.7861	113.457	89.3262	849.233	1045.83	686.354	2040.44	1563.12	1655.19	1217.72	1688.72	1978.57	2194.64	246.008	325.767	262.807
TMEM63C	533.443	3.64556	0.211082	17.2521	1.08e-66	3.66e-64	287.251	2.16674	0.438749	4.94315	7.69e-07	1.17e-05	1160.1	913.502	1645.04	505.587	964.805	760.969	84.9233	80.145	107.797	50.3531	63.0742	65.0255	159.241	174.732	39.0922	46.2571	503.284	618.801	374.971
PRKAG2	954.247	2.43959	0.141534	17.2328	1.51e-66	5.04e-64	704.977	1.0237	0.183753	5.56393	2.64e-08	5.38e-07	1360.43	1307.01	984.233	2091.39	1873.3	2095.21	257.554	203.647	271.54	279.231	349.094	378.33	151.045	135.31	99.6222	125.922	300.468	269.654	221.053
FOXA2	2282.89	4.14215	0.241573	17.1476	6.55e-66	2.16e-63	1196.97	0.834667	0.35309	2.37336	0.0176271	0.0651041	3997.48	3344.82	4024.19	3722.33	5389.63	5478.3	155.925	97.2251	251.072	432.578	272.905	228.18	142.848	137.441	161.413	79.665	401.876	129.371	180.936
LTBP4	4104.02	-2.27729	0.134228	-16.9658	1.47e-64	4.8e-62	7399.9	-1.96073	0.208353	-9.41429	4.76e-21	5.22e-19	1798.92	1655.55	1312.31	1369.12	1074.9	1177.07	8038.48	8198.44	6095.32	6963.6	5491.21	6073.38	7275.9	9123.33	11261.1	12885.2	2636.61	2568.73	2521.64
RP11-420N3.2	244.095	3.97056	0.233531	16.9505	1.91e-64	6.14e-62	120.929	2.51171	0.362703	6.90666	4.96e-12	1.94e-10	540.697	448.319	476.992	482.751	301.712	506.559	27.8437	49.9264	31.384	18.3102	16.8614	27.7836	15.2216	17.047	13.8714	17.9889	148.356	65.4651	76.1404
LINC00607	693.374	-3.50552	0.206981	-16.9276	2.81e-64	8.93e-62	358.989	-0.189068	0.400697	-0.525046	0.599551	0.773961	71.5478	74.4856	48.8626	173.663	166.404	132.293	1180.57	538.68	796.88	1469.39	1875.37	1792.34	19.9051	7.45805	7.56624	15.419	9.38962	18.7043	6.54971
KCNS3	843.388	2.53718	0.149954	16.9184	3.29e-64	1.03e-61	394.064	-1.0353	0.41657	-2.54683	0.0108706	0.0446117	1549.52	1375.88	1463.55	1241.66	1512.76	1482.36	322.987	227.297	337.037	209.423	216.701	181.48	44.4938	34.0939	114.755	66.8158	58.2156	9.35216	25.3801
CRLF1	1376.99	-4.0986	0.242214	-16.9001	4.49e-64	1.39e-61	1345.52	-0.56988	0.400339	-1.42054	0.155451	0.326761	61.3267	53.4048	83.7645	244.827	184.893	191.09	1102.61	603.058	1532.36	5274.48	2925.77	4266.26	499.969	755.394	924.342	1234.81	1076.05	264.978	369.24
COLEC12	1435.86	-3.92911	0.233107	-16.8561	9.47e-64	2.89e-61	2924.33	-1.48323	0.246315	-6.01671	1.78e-09	4.59e-08	252.462	345.726	141.934	103.56	116.819	100.633	2845.63	3908.71	3338.98	1303.46	2414.93	2357.47	3326.49	3722.63	4960.93	5541.86	2013.13	1298.39	1352.52
TRPA1	195.833	7.07882	0.38819	16.7555	5.16e-63	1.55e-60	93.6037	0.0643794	0.757858	0.108047	0.913958	0.967136	264.727	345.725	233.843	373.879	626.955	492.99	0	0	4.09356	1.14439	2.49799	4.13798	26.9304	15.9815	56.7468	1.28492	69.4832	4.67608	8.18714
TSPAN18	1456.53	6.32886	0.379497	16.7137	1.04e-62	3.1e-60	866.889	-1.93595	0.463278	-4.23621	2.27e-05	0.000243521	3099.04	2864.18	3030.65	2048.9	3243.19	2990.73	62.6484	36.7879	62.768	10.2995	3.74699	25.419	72.5951	144.899	167.718	205.587	63.8494	18.7043	26.1989
PPM1L	777.752	3.80068	0.227833	16.668	2.24e-62	6.59e-60	466.393	-1.37192	0.362474	-3.82478	0.000130889	0.00113204	1375.76	1468.63	1904.48	1462.59	1085.83	1443.92	112.767	97.2251	92.7874	43.4867	114.907	130.642	105.38	92.6929	70.6182	147.766	28.1689	42.0847	44.2105
PRKCQ	332.474	2.73345	0.164462	16.6095	5.95e-62	1.73e-59	265.598	1.65976	0.257624	6.44995	1.12e-10	3.57e-09	615.311	546.696	642.195	438.671	644.604	590.232	105.806	89.342	58.6744	84.6847	82.4337	91.0356	220.127	180.059	142.498	100.224	677.931	402.143	471.579
TEX14	174.513	2.76647	0.166433	16.5981	7.19e-62	2.07e-59	140.039	0.181582	0.335597	0.542606	0.587401	0.764794	162.516	140.539	116.34	438.14	509.296	461.33	19.4906	21.0216	16.3743	70.952	74.3152	63.8432	128.798	52.2064	51.7026	37.2627	60.0936	85.7281	83.5088
A2M	3280.98	5.04502	0.305118	16.5445	1.76e-61	4.98e-59	2161.41	2.57703	0.372708	6.90278	5.1e-12	1.98e-10	5283.29	6183.71	5883.3	7454.75	6887.26	6621.45	368.929	76.2035	212.865	170.514	124.275	105.223	139.336	525.26	234.554	412.459	2910.78	1454.26	1763.51
CDR2L	1010.12	-1.73359	0.104854	-16.5324	2.14e-61	6.01e-59	874.43	-0.664519	0.204411	-3.26153	0.00110812	0.00691668	424.176	335.888	339.712	605.961	503.413	577.794	1212.59	1144.37	1300.39	2039.3	1737.98	1899.93	375.855	446.418	543.508	621.901	230.985	366.293	334.035
ZBED3-AS1	221.059	3.74588	0.226862	16.4659	6.45e-61	1.79e-58	80.5653	-1.49784	0.419648	-3.57877	0.000345222	0.00260821	565.228	621.182	435.11	235.799	337.85	274.763	26.4515	57.8095	43.6647	22.8878	11.8654	20.0988	17.5633	35.1594	31.526	30.8381	7.5117	12.4695	9.00585
FAIM2	135.507	-3.61604	0.218919	-16.4447	9.16e-61	2.51e-58	348.12	-5.29169	0.348378	-14.9854	9.14e-51	1.26e-47	18.398	8.43233	8.14377	30.2715	26.8935	26.0064	180.984	185.253	184.21	262.065	303.506	391.926	574.906	711.711	868.857	962.405	24.413	17.1456	14.7369
VPS13B	10533.1	2.77823	0.170189	16.328	6.24e-60	1.69e-57	6685.89	-1.01062	0.250843	-4.03778	5.4e-05	0.000517443	19270.9	22477.8	20965.6	12047.5	18768.3	16610.2	3266.07	3748.42	3419.49	1384.71	2247.57	2190.18	3395.58	2231.02	3635.58	3046.54	1310.79	1449.58	1774.97
L3MBTL4	679.524	3.59172	0.220366	16.291	1.14e-59	3.06e-57	305.253	-2.57165	0.350501	-7.33027	2.3e-13	1.09e-11	1363.5	1357.61	1541.5	1046.22	1082.46	1165.76	61.2562	130.071	64.1325	121.305	132.393	88.0799	71.4242	93.7583	155.108	176.034	26.2909	23.3804	12.2807
BZW2	2319.06	2.18601	0.134516	16.2519	2.17e-59	5.74e-57	2096.93	1.24119	0.177579	6.9889	2.77e-12	1.11e-10	3650.98	4013.79	3535.56	3286.32	4440.79	3873.82	790.762	596.489	699.999	1019.65	929.252	991.343	1175.57	1453.25	1127.37	1284.92	3956.79	2481.44	2551.11
SCARA5	580.059	6.33017	0.386437	16.1883	6.1e-59	1.6e-56	550.65	-5.62798	0.563423	-9.71637	2.57e-22	3.25e-20	999.625	827.774	1016.81	772.188	1358.96	1918.82	6.96093	30.2186	1.36452	8.01071	8.74297	11.2317	166.266	236.527	641.869	855.756	13.1455	4.67608	4.09357
HEY1	243.188	3.08373	0.190345	16.1763	7.42e-59	1.92e-56	320.435	1.84831	0.298194	6.18977	6.03e-10	1.71e-08	567.272	515.778	681.75	294.218	289.105	278.155	47.3343	85.4004	45.0292	45.7755	30.6004	37.833	65.5698	89.4966	92.0559	138.771	471.359	372.528	221.871
CHAD	51190.7	4.69868	0.291995	16.1382	1.38e-58	3.53e-56	20239.9	2.02868	0.300332	6.78397	1.17e-11	4.27e-10	98635.8	78184.6	220021	42182	75258.2	75602.8	5705.18	7146.05	6927.67	1794.4	1107.86	1721.99	9971.29	10590.4	5013.9	4949.51	33233.6	30400.8	32522.6
KHDRBS3	734.747	-2.55608	0.158728	-16.1012	2.5e-58	6.35e-56	601.882	0.349473	0.212801	1.63194	0.102691	0.245041	132.874	134.917	87.2547	336.173	309.276	279.286	696.093	624.08	895.126	2067.91	1478.19	1775.79	197.88	280.21	172.762	159.33	204.694	300.828	268.538
SLC39A11	1081.31	2.58887	0.161219	16.0553	5.25e-58	1.32e-55	516.962	1.61478	0.200128	8.06387	7.39e-16	4.66e-14	2178.12	1871.98	2680.46	1283.62	1616.13	1558.12	289.575	300.872	287.914	305.551	273.53	329.856	190.855	171.535	114.755	110.503	450.702	500.34	415.088
CELF2	477.757	3.64459	0.227501	16.0062	1.16e-57	2.87e-55	450.475	-2.76303	0.428463	-6.47988	9.18e-11	2.95e-09	1365.54	1051.23	1347.21	471.598	541.232	530.304	137.826	77.5173	110.526	14.877	34.9719	50.2469	93.6711	94.8238	189.156	224.861	33.8026	15.5869	13.0994
DACH1	148.187	6.37706	0.375251	15.9736	1.95e-57	4.8e-55	156.705	4.06721	0.385119	10.4994	8.69e-26	1.62e-23	188.069	229.078	226.862	285.72	431.137	400.272	0	3.94156	5.45808	2.28877	1.87349	3.54684	17.5633	20.2433	7.56624	11.5643	401.876	176.132	207.135
C1orf74	411.436	3.13078	0.196358	15.9266	4.14e-57	1.01e-54	124.543	0.233771	0.343471	0.674851	0.49977	0.695544	976.116	940.205	1234.36	333.517	523.583	471.507	82.139	89.342	92.7874	62.9413	68.0702	62.6609	62.0571	53.2718	45.3974	48.8269	108.92	35.8499	45.0293
ABHD4	2878.45	1.31174	0.0828485	15.8329	1.85e-56	4.45e-54	1668.72	0.0104448	0.18024	0.0545838	0.95647	0.990574	4096.62	4124.81	4290.61	3573.1	4247.5	4284.27	1807.06	1709.32	1813.45	1532.33	1587.47	1474.9	766.932	1103.79	825.981	1174.42	1171.82	858.84	897.31
KLHL13	2159.59	3.52451	0.222802	15.8187	2.31e-56	5.52e-54	1317.68	1.38444	0.264289	5.24407	1.57e-07	2.79e-06	5557.22	5674.96	4594.25	2067.49	3076.79	2907.06	303.497	504.52	608.576	120.161	264.162	236.456	946.078	998.313	742.753	616.761	2689.19	1977.98	1891.23
WDR86	196.759	4.78558	0.301775	15.7234	1.05e-55	2.47e-53	199.702	2.14962	0.338603	6.35339	2.11e-10	6.4e-09	445.64	365.401	325.751	321.303	416.85	410.448	15.314	3.94156	1.36452	21.7434	15.6124	17.7342	121.772	129.983	44.1364	48.8269	424.411	439.551	326.667
MEPE	1114.77	9.97928	0.494792	15.6338	4.29e-55	1e-52	319.86	1.75256	0.871077	1.96759	0.0491153	0.143296	2135.19	2806.56	3678.66	1065.34	2109.46	1577.34	0	0	0	3.43316	0.624498	0.59114	0	0	1.26104	1.28492	9.38962	0	1.63743
SPINK5	3771.42	5.58831	0.358057	15.6301	4.54e-55	1.05e-52	1275.11	-0.23917	0.915734	-0.62221	0.533804	0.723316	3932.06	4514.11	16170	4089.31	8381.54	7338.32	109.983	282.478	195.127	86.9734	85.5562	71.528	1.17089	1.06544	1.26104	0	0	0	0.818714
SERPINE1	83039.2	-4.0076	0.258108	-15.6057	6.66e-55	1.53e-52	64332.7	-1.7691	0.226384	-7.83615	4.65e-15	2.67e-13	1766.21	1715.98	1626.43	20666.4	23327.6	24608.8	58726.6	25261.4	51072.7	199591	287898	300209	3609.85	3866.47	5432.56	5992.86	1755.86	1123.82	1222.34
ARHGEF37	1172.41	2.89435	0.185731	15.5817	9.69e-55	2.2e-52	521.831	-0.945976	0.326267	-2.90773	0.00364067	0.0185663	2097.37	1922.57	2665.34	1829.04	2095.17	1810.27	204.651	424.375	334.308	210.567	198.59	276.654	228.323	160.881	281.212	226.146	200.938	91.9629	57.31
PRB2	33039.6	9.56845	0.671805	15.5486	1.63e-54	3.66e-52	5606.5	-0.341091	0.535283	-0.683749	0.494134	0.690478	68770.7	57085.5	188325	18577.7	36203.7	27470.6	4.17656	1.31385	0	14.877	4.37148	17.7342	10.538	17.047	5.04416	10.2794	0	7.79347	13.9181
PAPLN	1579.81	3.2114	0.206562	15.5473	1.66e-54	3.71e-52	1176.96	-0.204524	0.272073	-0.738467	0.460231	0.661597	3247.25	2771.43	2879.41	2603.35	2811.21	2817.73	282.614	451.965	356.14	359.338	222.946	154.288	1299.69	1276.39	1363.18	1332.46	955.863	1206.43	1269.01
KALRN	889.27	-2.30763	0.14843	-15.5448	1.73e-54	3.82e-52	895.038	0.209287	0.228818	0.917197	0.35904	0.567574	273.926	307.78	281.542	367.507	262.212	280.416	1649.74	1369.04	1183.04	1237.08	1708	1750.96	832.502	722.365	986.133	1043.36	1423.47	757.525	935.79
PMEPA1	14492.6	-3.76446	0.242709	-15.517	2.66e-54	5.83e-52	7435.07	-0.261023	0.292411	-0.902168	0.366968	0.575482	1894.99	1322.47	1244.83	3419.62	1405.19	2329.27	27337	27108.7	25582	19076.9	26471.8	36718.7	2193.07	2235.28	2195.47	2637.94	2234.73	1767.56	1768.42
SLC38A4	44364.5	4.61924	0.298028	15.5006	3.44e-54	7.47e-52	20411.3	1.76529	0.408797	4.30504	1.67e-05	0.000186254	77190.9	92329.8	76252.5	73825.3	98801.8	95003.5	2890.18	2571.21	2984.21	948.697	5133.37	4442.42	686.141	539.111	406.055	263.409	1956.8	1589.87	1453.22
ITGB5	7245.94	-1.76385	0.114311	-15.4319	9.99e-54	2.15e-51	7510.49	-0.213398	0.146874	-1.45134	0.146685	0.314008	2004.36	1983	2394.27	5082.42	4011.34	4606.52	8759.63	6711.16	8112.08	14671	13914.4	14701.1	6240.84	7773.42	8229.55	8503.6	6480.72	7447.43	5956.96
NOG	1975.74	3.73401	0.242812	15.3792	2.26e-53	4.81e-51	1681.36	2.55942	0.268059	9.56391	1.13e-21	1.32e-19	5595.04	4351.08	3116.74	2859.33	3132.26	3094.76	204.651	308.755	173.294	361.626	187.974	323.354	752.881	785.226	559.902	553.8	6041.28	3087.77	2908.07
SLC44A2	30298.7	2.45663	0.160768	15.2795	1.05e-52	2.22e-50	13317.9	0.798669	0.16851	4.7372	2.17e-06	2.97e-05	61141.7	54361.8	76964.5	34509	41320.2	41340	8326.66	10820.9	8870.75	9628.88	7541.43	8758.34	4779.57	5882.27	5493.09	5580.4	12499.5	7628.24	8307.49
PPP1R14C	1394.2	-3.81384	0.249256	-15.2702	1.21e-52	2.53e-50	2033.02	1.51146	0.353257	4.30463	1.67e-05	0.000186429	35.7739	36.5401	31.4117	473.191	178.17	225.012	583.326	361.31	440.74	5743.68	3984.29	4636.91	1602.95	1734.53	793.194	782.516	2852.57	4100.92	3874.97
ALDH6A1	4477.57	1.63136	0.107135	15.2289	2.28e-52	4.73e-50	2321.76	0.833869	0.14521	5.74365	9.27e-09	2.1e-07	8403.8	8467.46	7560.91	4731.91	5405.6	5792.64	2802.47	2784.05	3218.91	1586.12	1426.98	1549.97	1525.67	1249.76	1215.64	1106.32	2505.15	2235.17	2095.91
FGFBP2	15371.5	3.97646	0.262813	15.1678	5.78e-52	1.19e-49	18545.5	2.29147	0.286054	8.03766	9.16e-16	5.72e-14	20960.4	20362.7	28357.8	23998.4	43170	35736.1	966.177	914.442	841.909	4277.72	1967.17	2904.86	10238.2	13001.5	7704.95	8868.51	67783.7	42781.4	39873
FGF1	1830.65	-5.30495	0.349864	-15.1458	8.07e-52	1.65e-49	1637.66	-0.228544	0.415265	-0.605699	0.544715	0.731841	12.2653	22.4862	65.1502	157.73	122.702	104.025	2585.29	1371.66	1285.38	2566.86	6041.39	7632.81	38.6393	27.7013	74.4014	73.2404	48.826	56.1129	30.2924
SNX22	2316.35	3.71194	0.245238	15.1336	9.73e-52	1.97e-49	1419.02	0.764868	0.267387	2.87779	0.00400469	0.0200877	4496.27	3451.63	4425.56	3696.84	5203.9	4644.96	215.789	423.061	350.682	386.803	144.259	356.458	907.439	888.573	798.238	652.739	1284.5	1560.25	1335.32
SPSB4	301.643	-4.01241	0.26477	-15.1036	1.53e-51	3.08e-49	755.661	0.0586929	0.152967	0.391294	0.69558	0.840573	35.7739	26.7024	19.7777	36.6444	33.6169	28.2678	245.025	404.667	283.82	1049.4	686.947	769.074	996.426	1044.13	1113.5	1090.9	1032.86	1164.34	1120
APOB	452.061	8.42558	0.47968	15.0741	2.4e-51	4.77e-49	158.503	0	1.19188	0	1	1	1056.86	1122.91	1571.75	621.893	307.595	732.701	5.56874	0	5.45808	0	0	0	0	0	0	0	0	0	0
IL17RB	914.315	2.98221	0.197942	15.0727	2.45e-51	4.84e-49	528.096	-0.803789	0.227272	-3.53988	0.000400315	0.00294965	1421.76	1318.25	1330.93	1318.14	2248.13	2059.03	96.0608	148.465	132.359	302.118	300.383	296.161	231.836	271.686	339.22	292.962	120.187	169.898	189.942
FAP	3853.53	-5.41609	0.363663	-15.0493	3.49e-51	6.84e-49	2500.95	-1.93602	0.320378	-6.06569	1.31e-09	3.49e-08	69.5036	54.8101	74.4574	417.428	225.233	211.443	8025.95	8655.66	8559.64	5228.71	7438.39	7281.08	823.135	1066.5	1192.94	1584.31	471.359	199.513	220.234
EFNB3	186.894	-3.22685	0.214564	-15.0086	6.45e-51	1.25e-48	339.355	-1.0676	0.151754	-7.03292	2.02e-12	8.3e-11	45.995	43.567	27.9215	37.7066	20.1701	30.5292	456.637	490.067	286.549	266.642	269.158	267.787	402.786	448.548	489.284	447.152	180.281	238.48	216.14
CNTNAP2	233.573	4.31374	0.28741	14.9548	1.45e-50	2.8e-48	117.508	0.948655	0.498703	1.88191	0.0598479	0.165298	551.94	646.479	800.417	240.579	149.595	267.979	38.9812	53.868	34.113	5.72194	3.74699	9.45825	31.614	14.9161	22.6987	12.8492	18.7792	81.052	22.924
ASPHD2	252.22	-2.49488	0.167142	-14.9202	2.43e-50	4.66e-48	171.94	-1.25502	0.276706	-4.55547	5.23e-06	6.6e-05	70.5257	40.7563	47.6992	103.56	97.489	96.1105	364.753	395.47	384.795	514.974	423.409	487.1	71.4242	46.8792	89.5339	113.073	35.6806	31.1739	31.9298
BGN	64959.2	-3.71382	0.250333	-14.8357	8.61e-50	1.64e-47	29916.9	-2.63714	0.339173	-7.80113	6.14e-15	3.5e-13	8884.19	8148.44	7757.53	11216.9	5654.36	6740.17	186539	155609	167754	54040.3	69446.6	97720.3	11170.3	14728.6	20746.6	24322.2	2606.56	2599.9	2976.84
LRRC1	1981.06	1.85576	0.125101	14.834	8.83e-50	1.66e-47	1593.14	1.7882	0.170465	10.4919	9.41e-26	1.73e-23	3109.26	3032.83	3710.07	2432.87	3292.78	3049.53	1130.45	848.749	922.416	714.098	760.014	769.665	834.844	910.948	731.403	733.689	3464.77	2475.2	2442.22
FGF13	1210.37	3.36415	0.227253	14.8213	1.07e-49	2e-47	1037.16	-3.51803	0.40469	-8.6549	4.93e-18	4e-16	1242.89	1635.87	1346.05	2570.42	3219.66	3118.5	100.237	106.422	77.7777	223.156	459.006	424.439	99.5255	126.787	205.549	273.688	20.6572	14.0282	8.18714
IL11	2799.15	-2.9718	0.202092	-14.6893	7.55e-49	1.4e-46	2521.67	-0.492403	0.234699	-2.10715	0.0351047	0.110813	82.791	61.8371	31.4117	1252.81	1071.54	966.759	466.382	457.221	373.879	10812.2	7244.8	10768.2	310.286	361.183	479.195	621.901	343.66	299.269	298.012
PDE7A	919.219	2.17197	0.148029	14.6711	9.88e-49	1.82e-46	1075.48	0.178394	0.176595	1.01388	0.310641	0.517927	1415.62	1658.36	1665.98	1555.53	1372.41	1373.82	385.635	388.901	324.756	207.134	370.952	311.531	1373.45	1163.46	1239.6	1141.01	1286.38	1225.13	1660.35
PTPLAD2	1082.38	1.98927	0.135746	14.6545	1.26e-48	2.3e-46	671.952	-0.620501	0.167796	-3.69565	0.000219321	0.00176465	1692.62	2176.95	1760.22	1422.23	1692.61	1614.66	474.735	583.351	523.976	311.273	321.616	414.389	621.742	729.823	706.182	695.141	576.523	400.584	372.515
FAM89A	860.578	2.92241	0.199788	14.6222	2.03e-48	3.68e-46	923.434	1.75955	0.232321	7.58263	3.39e-14	1.78e-12	1416.65	1370.25	694.548	1532.69	2222.92	1925.6	183.768	151.093	133.723	215.145	209.207	271.334	665.065	701.057	383.356	406.035	1806.56	2002.92	1741.4
ARHGEF9	2298.04	1.56521	0.107079	14.6155	2.24e-48	4.03e-46	1767.14	0.610636	0.111904	5.46003	4.76e-08	9.33e-07	4522.84	4595.62	4771.09	2093.51	2318.73	2496.61	1297.52	1587.13	1293.57	852.569	905.521	841.784	2024.47	1987.04	1800.77	1703.8	3273.22	2495.47	2855.67
CRYZ	2352.77	2.66862	0.182726	14.6047	2.62e-48	4.68e-46	1385.75	0.901312	0.236731	3.80514	0.000141723	0.0012129	4317.4	4692.59	3914.83	2653.27	4679.47	4201.73	519.285	601.745	564.912	525.274	725.042	837.646	549.147	547.634	547.291	684.862	1318.3	1052.12	914.504
RP11-481A20.11	224.433	4.28875	0.293239	14.5395	6.81e-48	1.21e-45	50.8413	2.83497	0.585331	4.80793	1.52e-06	2.16e-05	686.859	674.586	654.992	178.974	156.319	225.012	18.0984	34.1602	31.384	21.7434	8.11847	2.9557	14.0507	4.26174	1.26104	5.13968	65.7273	38.9673	47.4854
P4HA3	711.529	-3.64	0.251285	-14.4833	1.54e-47	2.72e-45	801.052	-0.611411	0.285156	-2.14137	0.0322445	0.103946	60.3046	51.9994	97.7253	193.844	114.297	104.025	1499.38	748.896	1187.13	1825.3	1240.25	1415.19	1010.48	987.659	967.218	887.879	330.515	858.84	688.538
DLX3	177.172	4.99171	0.341351	14.4423	2.8e-47	4.9e-45	136.612	1.39545	0.412969	3.39514	0.000685925	0.00464574	375.115	268.429	651.502	174.725	314.318	283.809	8.35312	11.8247	20.4678	4.57755	9.99196	2.9557	51.5191	63.9261	97.1001	163.185	294.834	216.658	254.62
FGL2	167.72	2.95426	0.204558	14.4144	4.2e-47	7.29e-45	131.861	-1.97221	0.452634	-4.38628	1.15e-05	0.000133931	381.248	338.699	471.175	158.793	201.701	241.972	29.2359	55.1818	54.5808	24.0321	30.6004	25.419	33.9558	37.2903	108.449	75.8102	22.5351	18.7043	6.54971
FAM177B	106.209	5.32448	0.357712	14.3655	8.52e-47	1.47e-44	42.8852	1.27258	0.555237	2.31442	0.0206446	0.0736337	269.837	281.078	289.686	94.0009	154.638	160.561	0	2.62771	13.6452	1.14439	3.74699	3.54684	8.19622	22.3742	15.1325	29.5531	95.7741	32.7326	18.8304
IHH	5721.36	5.68257	0.401293	14.3626	8.88e-47	1.52e-44	3386.74	6.48842	0.433356	14.9619	1.3e-50	1.59e-47	12836.7	9979.66	18321.2	6930.58	9976.66	9438.05	79.3546	111.677	42.3002	426.856	247.301	266.013	115.918	124.656	47.9195	33.4079	15451.6	4554.5	5399.42
THY1	2456.48	-3.11155	0.216947	-14.3496	1.07e-46	1.82e-44	3451.67	-0.326307	0.18112	-1.80194	0.0715553	0.188629	405.778	359.779	417.659	655.882	538.711	568.748	5398.9	4316.01	6283.62	3126.47	3504.06	3902.12	3510.32	4305.43	3335.45	3943.42	2409.38	3561.61	3043.98
HDC	1130.7	10.494	0.524326	14.201	9.04e-46	1.52e-43	226.779	0.980395	0.850979	1.1397	0.254412	0.455073	3090.86	2514.24	4479.08	743.51	1339.63	1399.82	0	0	0	0	1.249	0	0	1.06544	2.52208	0	0	6.23477	0.818714
ABR	6675.21	-1.97326	0.139288	-14.1678	1.45e-45	2.43e-43	4600.26	-0.927262	0.195511	-4.75077	2.03e-06	2.8e-05	2161.76	2265.49	2108.07	3844.48	2970.05	2974.9	11896.2	8772.6	7822.8	11154.3	13053.2	11078.6	2424.91	2407.89	3314.01	2780.57	1515.48	1278.13	1491.7
SH3BP4	5953.84	2.18746	0.154446	14.1629	1.56e-45	2.59e-43	3420.15	0.296137	0.170886	1.73189	0.083294	0.210622	8499.88	7431.69	10892.9	8717.13	11735.7	11462	2123.08	1849.9	2034.5	1661.65	2467.39	2570.28	1780.92	1816.57	1837.34	1716.65	2336.14	2119.82	2137.66
GSDMC	451.117	4.86392	0.343306	14.1135	3.14e-45	5.18e-43	104.422	-1.14193	0.739683	-1.62606	0.103937	0.247173	885.148	964.096	2083.64	242.172	616.87	486.206	22.275	21.0217	24.5614	28.6097	18.1104	20.6899	9.36711	3.19631	16.3935	0	0	7.79347	0.818714
GRB14	258.097	4.85899	0.342323	14.1065	3.47e-45	5.68e-43	88.4132	-0.126598	0.599138	-0.285151	0.775528	0.890392	526.387	609.938	828.338	252.793	364.743	429.671	6.96093	17.0801	9.55165	29.7541	12.49	9.45825	2.34178	21.3087	25.2208	8.99444	18.7792	12.4695	8.18714
CTD-2008A1.2	407.424	2.96528	0.211294	14.0215	1.15e-44	1.88e-42	130.385	0.685049	0.38503	1.77846	0.0753286	0.195767	1095.7	1034.37	834.155	363.789	496.69	558.572	89.0999	97.2251	80.5067	72.0964	69.9437	96.9471	48.0064	66.057	27.7429	16.7039	56.3377	93.5216	46.6667
SLC6A13	118.804	4.79394	0.336586	14.0091	1.37e-44	2.22e-42	47.3238	-1.62356	0.565299	-2.85719	0.00427416	0.0211796	181.936	165.836	295.503	154.544	271.457	313.207	5.56874	13.1385	1.36452	8.01071	5.62048	9.45825	18.7342	13.8507	15.1325	11.5643	3.75585	7.79346	2.45614
ZNF365	608.239	-3.16779	0.226288	-13.9912	1.77e-44	2.84e-42	255.501	-4.08953	0.607727	-5.96492	2.45e-09	6.13e-08	98.1227	158.809	119.83	148.702	100.01	74.627	1321.18	1288.89	1136.65	571.049	1135.96	1145.04	25.7596	40.4866	59.2689	71.9555	3.75585	0	1.63743
ANKRD13B	348.681	-1.44363	0.103181	-13.9896	1.8e-44	2.88e-42	485.671	-0.5539	0.134941	-4.10272	4.08e-05	0.000405674	232.019	226.268	244.313	143.391	118.5	151.515	652.935	639.846	674.073	392.525	365.331	343.453	627.596	745.805	706.182	758.102	413.143	478.519	546.901
PTGS1	171.253	-3.40885	0.243184	-13.9798	2.07e-44	3.28e-42	410.486	-2.85451	0.298896	-9.51601	1.8e-21	2.03e-19	29.6412	22.4862	26.7581	43.5485	19.3297	24.8757	363.361	199.706	264.717	280.375	397.18	383.059	1149.81	1378.67	1206.82	1229.67	88.2624	201.071	208.772
PIGG	4437.95	1.21423	0.0873606	13.8986	6.46e-44	1.02e-41	2426.7	0.0373658	0.108227	0.344111	0.730763	0.864199	6869.61	6965.1	7826.17	5036.22	5112.29	5537.1	2681.35	3056.02	2915.98	2307.09	2567.31	2381.11	1545.57	1818.7	1633.05	1625.42	1902.34	1449.58	1747.95
SSTR2	425.715	3.71816	0.267309	13.8831	8.02e-44	1.26e-41	102.265	0.377742	0.549759	0.683889	0.494046	0.690399	1212.22	1003.45	1292.53	280.41	547.115	461.33	82.139	70.9481	34.113	56.075	38.0943	30.1482	35.1267	37.2903	69.3572	32.123	75.117	57.6716	40.117
FAM196A	435.129	4.49653	0.325095	13.8579	1.14e-43	1.77e-41	136.197	2.39897	0.295237	8.09331	5.81e-16	3.71e-14	1435.04	1343.55	531.672	545.949	577.37	541.611	43.1578	73.5758	92.7874	12.5883	11.241	13.0051	17.5633	19.1778	13.8714	6.4246	97.6521	60.789	78.5965
GSE1	2454.66	2.38622	0.172649	13.8219	1.88e-43	2.91e-41	1817.1	0.675635	0.170484	3.95856	7.54e-05	0.000698178	4059.83	3876.06	4600.07	4096.21	3906.28	4227.73	900.744	643.788	498.05	685.488	1046.03	915.677	713.071	721.3	765.451	697.711	955.863	1229.81	1286.2
TRIM53AP	396.088	9.69292	0.587839	13.8202	1.93e-43	2.96e-41	121.844	5.88661	0.694461	8.19684	2.47e-16	1.63e-14	1137.61	1194.58	1212.26	290.5	533.668	384.442	0	0	0	0	0	0	2.34178	8.52349	0	1.28492	523.941	120.019	145.731
ALPK1	660.01	2.05518	0.148729	13.8164	2.03e-43	3.1e-41	400.516	0.145355	0.261027	0.550389	0.582052	0.76121	1156.01	1394.15	1122.68	852.381	984.975	905.7	238.064	269.34	208.772	231.166	288.518	268.378	182.659	200.302	354.352	155.475	210.327	285.241	243.977
INSC	512.277	-3.77974	0.274589	-13.7439	5.54e-43	8.4e-41	322.685	-2.41307	0.560677	-4.36811	1.25e-05	0.000144581	58.2603	21.0808	62.8234	96.6563	84.0423	57.6663	800.507	767.29	361.598	1638.76	1054.78	1143.86	26.9304	84.1694	84.4897	141.341	31.9247	6.23477	4.91228
CELSR1	831.55	-2.9429	0.214052	-13.7381	6.01e-43	9.05e-41	645.826	-0.252012	0.249268	-1.0209	0.307303	0.514334	104.255	89.9448	209.411	245.889	183.212	217.097	849.233	843.494	865.106	1986.66	1999.64	2384.66	133.481	191.778	138.714	123.352	71.3611	174.574	121.17
UCMA	751.246	-9.30117	0.545408	-13.7233	7.37e-43	1.1e-40	7757.94	-5.68072	0.815022	-6.67746	2.43e-11	8.59e-10	1.02211	0	2.32679	1.06216	0	0	583.326	2874.71	2613.06	1771.51	650.102	517.839	23002.1	32068.5	32880.4	39184.9	495.772	372.528	363.509
RBPMS	1055.44	2.92404	0.213132	13.7184	7.88e-43	1.17e-40	742.038	2.50624	0.20928	11.9711	5.03e-33	1.82e-30	2402.98	2269.7	1548.48	1664.4	1609.41	1739.04	140.611	239.121	261.988	342.172	251.673	195.667	234.178	183.255	143.759	205.587	1344.59	972.624	998.012
TBX2	128.478	3.02499	0.220541	13.6861	1.23e-42	1.82e-40	219.439	0.707689	0.356214	1.96961	0.0488831	0.142757	282.103	283.888	304.81	206.059	154.638	137.947	54.2952	43.3571	25.9259	16.0214	14.3634	18.3254	25.7596	60.7298	69.3572	98.9388	153.99	84.1694	78.5965
R3HDML	219.937	-7.66059	0.474647	-13.6694	1.55e-42	2.27e-40	46.4799	0	1.10315	0	1	1	1.02211	2.81078	2.32679	0.531079	0.840423	0	444.107	1064.22	478.947	204.845	172.986	266.604	0	0	0	0	0	0	0
KCNN3	138.769	-4.3756	0.317389	-13.6675	1.59e-42	2.32e-40	120.065	-2.81473	0.441971	-6.31703	2.67e-10	7.99e-09	11.2432	5.62155	17.4509	16.9945	5.04254	11.3071	256.162	342.916	140.546	241.466	297.261	319.216	65.5698	56.4681	80.7066	119.498	7.5117	7.79347	13.9181
CA2	718.413	4.5904	0.336306	13.665	1.64e-42	2.39e-40	928.414	4.73145	0.450008	10.5146	7.4e-26	1.39e-23	1897.04	1715.98	896.978	918.235	1567.39	1307.1	12.5297	30.2186	51.8518	62.9413	86.8052	73.8926	90.1584	142.768	109.71	122.067	7626.25	1281.25	1589.12
FBLN7	1110.7	-2.73993	0.200874	-13.6498	2.02e-42	2.92e-40	2823.09	-1.2086	0.186986	-6.44704	1.14e-10	3.63e-09	194.201	223.457	173.346	435.485	380.712	364.089	1887.8	2014.14	2048.15	1909.98	1638.68	2058.35	6122.58	7384.53	7344.3	8107.84	2383.09	3570.97	3410.76
NPR3	6669.83	5.12225	0.38099	13.6204	3.03e-42	4.35e-40	1573.33	-0.992389	0.378617	-2.63626	0.00838253	0.0363589	14125.6	15574.5	23473.8	5154.12	10217	8864.78	424.617	658.24	1270.37	58.3638	69.3192	147.194	234.178	251.443	348.047	393.185	215.961	87.2868	149.825
RP11-453F18__B.1	294.161	2.03549	0.149514	13.6118	3.41e-42	4.86e-40	96.8773	1.37676	0.282523	4.86707	1.13e-06	1.66e-05	622.466	642.262	588.678	312.805	321.882	338.083	183.768	191.822	117.349	65.2301	80.5602	65.0255	31.614	20.2433	20.1766	16.7039	69.4832	51.4369	56.4913
TMEM255B	156.983	-4.06615	0.296612	-13.6088	3.55e-42	5.04e-40	116.299	-1.38162	0.595022	-2.43478	0.014901	0.0570922	5.11056	11.2431	6.98038	30.8026	17.6489	24.8757	193.514	73.5758	146.004	590.504	381.568	401.976	3.51267	14.9161	3.78312	15.419	3.75585	1.55869	3.27486
PDE4D	1310.24	1.6477	0.121541	13.5575	7.16e-42	1e-39	966.035	0.86181	0.143269	6.01526	1.8e-09	4.63e-08	1618	1864.95	1533.36	2187.51	2405.29	2284.04	548.521	391.528	513.06	709.52	820.59	846.513	578.419	518.867	457.758	555.085	1062.9	843.253	977.544
GPR171	251.939	-7.44746	0.498722	-13.5459	8.37e-42	1.17e-39	155.639	2.18883	0.947076	2.29188	0.0219124	0.0769606	0	1.40539	0	1.59324	4.20211	2.26142	300.712	258.829	937.426	259.776	514.586	742.472	43.3229	1.06544	0	1.28492	76.9949	46.7608	96.6082
CYGB	938.556	-2.384	0.176153	-13.534	9.85e-42	1.37e-39	636.344	1.30147	0.308441	4.19815	2.69e-05	0.00028287	279.036	213.619	155.895	472.66	345.414	343.736	1518.88	1076.05	1183.04	2183.49	1729.86	1761.01	104.209	153.423	59.2689	53.9666	221.595	249.391	225.965
SLC7A8	1024.09	2.40571	0.178507	13.4811	2.02e-41	2.77e-39	1403.82	0.0676696	0.155785	0.443532	0.657381	0.814558	1759.05	1436.31	2213.94	1542.25	1653.11	1691.54	392.596	416.491	484.405	196.835	267.285	235.274	2111.11	2412.15	2218.17	1825.87	2112.66	2252.31	2375.09
ADRA2C	188.468	3.2503	0.2406	13.4813	2.02e-41	2.77e-39	154.665	0.764363	0.323499	2.35548	0.0184986	0.0674975	334.23	234.7	345.529	507.711	317.68	313.207	22.275	35.474	40.9356	52.6418	31.2249	26.0102	46.8355	58.599	51.7026	59.1063	110.797	95.0803	74.503
TLR2	1204.67	-2.43053	0.180516	-13.4613	2.64e-41	3.6e-39	938.89	-3.0753	0.291037	-10.56	4.57e-26	8.76e-24	199.312	234.7	146.588	667.566	460.552	487.337	1258.54	780.429	1034.31	2568.01	3680.16	2938.56	272.817	317.5	477.934	521.677	69.4832	32.7326	36.8421
CPT1C	498.388	-2.40112	0.178791	-13.4267	4.22e-41	5.72e-39	397.804	-4.14222	0.28811	-14.222	6.69e-46	5.9e-43	173.759	154.593	100.052	173.132	156.319	180.914	797.722	991.959	664.522	1080.3	730.038	777.35	282.184	331.351	421.187	468.996	26.2909	12.4695	21.2866
SCUBE1	4351.14	4.82547	0.36374	13.4116	5.17e-41	6.97e-39	2563.51	1.92251	0.363836	5.29401	1.2e-07	2.16e-06	8003.13	6280.68	8808.07	7796.77	9690.91	9801.01	448.284	500.578	533.528	145.337	148.63	56.7495	912.122	775.637	321.565	371.342	3160.55	1954.6	1896.96
CCBE1	91.3573	6.09653	0.420633	13.3855	7.35e-41	9.85e-39	52.6787	1.29014	1.02486	1.29174	0.196446	0.383163	79.7247	112.431	143.098	200.748	265.574	282.678	4.17656	0	1.36452	2.28877	1.249	2.9557	0	0	0	0	0	0	1.63743
ATP6V0A4	186.918	-4.24042	0.314261	-13.3437	1.29e-40	1.72e-38	194.435	-0.896551	0.182527	-4.88843	1.02e-06	1.5e-05	14.3096	2.81078	3.49019	22.8364	26.8935	14.6993	75.178	95.9113	99.61	541.295	663.216	682.767	225.982	252.508	253.469	230.001	138.966	130.93	120.351
SOCS2	631.395	4.15596	0.313945	13.3092	2.05e-40	2.71e-38	410.777	1.01114	0.172406	5.86156	4.59e-09	1.09e-07	1312.39	1006.26	1308.82	1045.16	1219.45	1240.39	112.767	111.677	135.088	35.476	25.6044	23.6456	169.779	154.488	119.799	116.928	270.421	289.917	291.462
RP11-1223D19.1	337.877	3.76093	0.281974	13.3052	2.16e-40	2.84e-38	88.7021	1.48477	0.585139	2.51896	0.0117702	0.0474987	965.895	663.343	1084.29	313.868	387.435	395.749	25.0593	38.1017	91.4229	19.4546	36.2209	33.695	5.85444	14.9161	3.78312	12.8492	3.75585	59.2303	21.2866
TRPC5OS	130.105	6.51485	0.445723	13.3028	2.23e-40	2.92e-38	36.4253	2.06835	0.753635	2.67505	0.00747174	0.0331833	279.036	292.321	473.502	89.2212	229.435	186.567	4.17656	3.94156	0	0	1.87349	1.18228	1.17089	3.19631	0	1.28492	3.75585	9.35216	9.00585
SORD	2651.7	2.83268	0.213029	13.2949	2.48e-40	3.23e-38	1419.84	0.515814	0.240909	2.14267	0.0321399	0.103681	6788.86	5627.17	5460.98	2683.54	3665.92	3911.13	715.584	608.314	562.183	371.926	655.722	769.074	900.413	1061.17	891.555	916.148	1489.19	1349.83	1221.52
CMTM3	1551.73	-1.91341	0.144239	-13.264	3.74e-40	4.85e-38	1466.55	-0.588715	0.169391	-3.48432	0.000493385	0.0035065	679.704	567.777	587.515	655.351	675.7	646.767	1898.94	1947.13	1986.74	3700.95	2767.77	2506.44	742.343	787.357	919.298	1051.06	644.128	508.134	587.837
SCNN1B	382.609	7.98824	0.535831	13.249	4.57e-40	5.89e-38	114.802	-1.15252	0.870961	-1.42347	0.154601	0.325689	718.544	650.695	1396.08	410.524	727.806	680.688	0	0	0	3.43316	0	3.54684	0	2.13087	7.56624	1.28492	0	0	1.63743
PKP1	758.604	-3.57509	0.270057	-13.245	4.82e-40	6.18e-38	638.943	-1.7172	0.433745	-3.96866	7.23e-05	0.000673763	110.388	88.5395	43.0457	205.527	100.01	135.685	1610.76	1445.24	1408.19	1140.95	1237.75	1577.16	264.621	339.874	923.081	1191.12	223.473	165.221	203.86
PKNOX2	566.934	-2.63034	0.198561	-13.2437	4.91e-40	6.26e-38	609.819	0.215766	0.331745	0.649829	0.515803	0.709293	197.268	252.97	179.163	151.888	79.8402	71.2348	1475.72	1246.85	1135.28	559.606	693.192	760.207	475.381	471.988	667.09	668.158	587.79	662.444	741.755
PDPN	20389.2	2.85698	0.215928	13.2433	4.93e-40	6.26e-38	11247	1.79814	0.200758	8.95967	3.26e-19	3.06e-17	40231.3	35415.8	40529.2	26861.4	35563.3	36234.8	4353.36	2774.86	3483.62	5815.78	6047.01	7360.29	3791.34	4497.2	3408.59	3519.39	17930.4	11194.5	10942.9
B3GALT1	64.6746	4.14622	0.307739	13.2355	5.47e-40	6.91e-38	65.8214	-0.409376	0.3319	-1.20232	0.22924	0.424562	121.631	151.782	118.666	85.5037	139.51	120.986	1.39219	6.56926	12.2807	6.86632	4.99598	5.91141	140.507	98.0201	131.148	75.8102	56.3377	88.8455	103.977
WFIKKN2	120.425	2.69151	0.203205	13.2208	6.66e-40	8.36e-38	208.312	2.03798	0.291396	7.0089	2.4e-12	9.79e-11	275.97	207.997	223.372	198.092	174.808	172.999	22.275	52.5541	43.6647	20.599	24.9799	27.7836	176.804	209.891	116.016	120.782	1012.2	484.753	478.948
SLC27A2	447.687	4.67909	0.353508	13.2087	7.81e-40	9.76e-38	164.343	3.26685	0.746564	4.13055	3.62e-05	0.000366323	821.777	829.179	1069.16	577.814	1000.94	895.524	45.9421	10.5108	8.18713	41.1979	19.9839	52.0204	0	2.13087	0	2.56984	43.1923	9.35216	4.09357
ADRB1	117.32	5.95547	0.422865	13.2007	8.7e-40	1.08e-37	30.8161	1.93758	0.719585	2.65139	0.00801611	0.0351199	311.744	310.591	407.189	109.402	103.372	149.254	4.17656	2.62771	1.36452	6.86632	1.249	0	2.34178	3.19631	2.52208	0	11.2675	7.79346	9.00585
MAPK10	636.119	3.22009	0.244305	13.1946	9.42e-40	1.17e-37	404.822	-0.358351	0.201476	-1.77166	0.0764511	0.198078	1184.63	1465.82	964.455	1030.29	1060.61	1158.98	122.512	231.238	192.397	72.0964	59.9518	90.4445	306.773	339.874	335.437	278.828	238.496	327.326	177.661
ST6GAL2	912.172	-2.9442	0.223086	-13.1797	1.15e-39	1.41e-37	566.106	-2.80889	0.307279	-9.12279	7.32e-20	7.34e-18	318.899	359.779	323.424	60.543	31.0956	40.7056	3087.87	2697.34	3079.72	183.102	317.869	445.72	1118.2	1143.21	1499.38	1640.84	182.159	187.043	191.579
FMO5	1366.46	4.11789	0.313086	13.1464	1.78e-39	2.18e-37	279.751	-0.322251	0.314867	-1.046	0.29556	0.500992	3708.22	3257.69	5143.37	992.586	1415.27	1196.29	75.178	131.385	146.004	67.5189	139.887	124.14	50.3482	42.6174	42.8754	42.4023	52.5819	31.1739	26.1989
SPRY1	494.695	2.40391	0.183644	13.0927	3.62e-39	4.41e-37	544.965	0.426659	0.275539	1.54337	0.122742	0.277848	1578.14	1416.63	1695.07	70.1024	108.415	109.679	321.595	235.18	353.411	14.877	13.739	19.5076	165.095	178.993	214.377	250.559	384.974	227.569	209.591
AP1M2	170.973	4.34488	0.330211	13.0671	5.08e-39	6.15e-37	64.0963	0.164262	0.456551	0.399005	0.68989	0.836961	443.596	382.266	520.038	144.453	261.371	219.358	6.96093	23.6494	9.55165	22.8877	7.49397	10.0494	60.8862	54.3372	35.3091	56.5365	105.164	32.7326	41.7544
AOC3	1193.3	1.80953	0.138632	13.0557	5.9e-39	7.11e-37	883.09	-0.243358	0.182048	-1.34748	0.177824	0.358303	929.099	867.125	1149.44	2453.05	2839.79	2834.69	235.279	278.537	253.801	918.943	914.264	645.525	243.545	216.284	286.256	260.839	206.572	182.367	242.339
DLX4	82.8672	5.16366	0.382063	13.0339	7.85e-39	9.42e-37	43.9658	2.14389	0.428674	4.99371	5.92e-07	9.27e-06	194.201	132.106	235.006	102.498	161.361	149.254	4.17656	1.31385	1.36452	3.43316	4.37148	5.32026	8.19622	8.52349	12.6104	21.8436	84.5066	38.9673	54.0351
MBP	795.828	-2.89889	0.222526	-13.0325	7.99e-39	9.54e-37	376.386	0.00102626	0.402138	-0.0425644	0.966049	0.994883	152.295	99.7826	155.895	260.76	233.637	221.619	1741.62	1336.19	1312.67	941.831	1431.35	1662.29	73.766	44.7483	56.7468	41.1174	107.042	20.263	36.8421
TRIM49D1	275.98	9.15951	0.597259	13.0119	1.05e-38	1.24e-36	47.4469	4.95862	0.964875	5.0119	5.39e-07	8.48e-06	1057.88	875.557	700.365	172.07	293.308	212.574	0	0	0	0	0	0	0	0	0	0	41.3143	7.79347	5.731
LITAF	3775.59	-1.42328	0.109431	-13.0061	1.13e-38	1.34e-36	5156.27	0.305975	0.149228	2.05749	0.0396395	0.12161	1933.84	2039.22	1964.98	2250.71	2249.81	1806.88	6235.6	6058.18	5425.34	4590.14	5182.7	5569.73	7346.16	7871.44	6334.2	7024.65	8976.48	9018.6	8544.92
WDR86-AS1	95.9393	6.5164	0.450164	12.975	1.7e-38	1.99e-36	59.8062	2.68369	0.547266	4.88789	1.02e-06	1.51e-05	132.875	134.917	117.503	153.482	351.297	253.28	1.39219	0	0	2.28877	1.87349	2.36456	9.36711	21.3087	3.78312	3.85476	110.797	42.0847	57.31
APCDD1L	1568.79	-2.59174	0.200026	-12.9554	2.19e-38	2.56e-36	1093.85	-3.18089	0.4526	-7.07147	1.53e-12	6.43e-11	376.137	341.509	388.574	440.264	481.562	587.97	3214.56	1559.54	1914.42	2329.97	3181.82	4009.11	141.678	177.928	364.441	503.688	60.0936	15.5869	14.7369
DDR1	3687.82	3.07568	0.238732	12.8826	5.64e-38	6.57e-36	41.9166	-2.59235	0.724336	-3.37681	0.000733311	0.00489155	6051.92	5315.18	7940.18	6140.33	6739.35	7546.37	710.015	730.502	684.99	365.06	784.993	1244.94	14.0507	9.58892	15.1325	20.5587	0	0	4.09357
RTKN	3535.58	-1.41167	0.109645	-12.8742	6.29e-38	7.29e-36	3184.55	-0.443	0.0946084	-4.68093	2.86e-06	3.82e-05	2086.13	1883.22	1947.53	1974.02	1779.17	1767.3	5694.04	6636.27	5759.64	4674.82	4056.74	4168.13	3833.49	3954.9	4220.7	4274.93	2940.83	3212.47	2831.11
RASGRF2	517.76	3.87928	0.30275	12.8575	7.8e-38	9e-36	291.644	3.92574	0.349808	11.2171	3.36e-29	9.14e-27	1339.99	1299.98	1460.06	364.32	547.956	746.27	154.533	72.2619	165.107	22.8877	13.7389	26.0102	66.7407	57.5335	32.787	56.5365	1213.14	807.403	572.281
CD24P4	1857.51	7.93381	0.629955	12.7648	2.58e-37	2.96e-35	580.338	1.56143	0.582527	2.66485	0.00770239	0.0339954	3636.67	3564.06	6613.91	1865.15	3705.42	2867.49	8.35312	1.31385	25.9259	1.14439	0.624498	0	18.7342	27.7013	34.0481	79.665	277.933	43.6434	58.9474
CKB	17689.7	3.17513	0.249073	12.7432	3.4e-37	3.89e-35	4622.96	-0.1697	0.349983	-0.505026	0.613541	0.784077	55406.6	46862.7	33132.4	13824	22456.1	20986	5357.13	4988.7	2547.56	3301.56	1611.83	1802.39	669.748	1096.33	977.306	1291.34	1511.73	612.566	550.176
POSTN	337828	-3.96218	0.31267	-12.7242	4.34e-37	4.94e-35	170222	-3.16238	0.30334	-10.482	1.04e-25	1.89e-23	26100.6	30052.8	15483.6	57597.1	48241.9	54988.8	781054	706892	846187	315527	546892	624919	12674.9	16744.4	22271.2	28071.6	3136.13	1432.44	1798.71
KIAA1467	548.078	1.53227	0.120592	12.7052	5.53e-37	6.26e-35	370.069	0.40876	0.16894	2.41764	0.0156215	0.0592552	789.07	761.72	987.723	770.064	864.795	719.133	332.732	299.558	257.894	252.91	251.673	289.659	319.653	266.359	238.337	200.447	398.12	335.119	296.374
DNM3	328.178	-3.9337	0.309414	-12.6987	6.01e-37	6.77e-35	251.827	-2.63713	0.284774	-9.24604	2.33e-20	2.4e-18	29.6412	22.4862	32.5751	31.8647	47.0637	36.1828	999.59	734.444	929.239	462.332	237.934	374.783	211.931	205.629	208.072	294.247	33.8026	35.8499	36.8421
RXRA	8859.71	2.02719	0.160287	12.6468	1.16e-36	1.31e-34	5099.41	0.424715	0.186104	2.27982	0.0226184	0.0787499	17780.7	13937.2	16199.1	11044.8	13434.2	13304	3541.72	3502.73	3332.16	2293.35	3938.08	4008.52	2782.03	2949.13	2800.77	2779.28	3971.81	3941.93	3493.45
ARVCF	234.952	-2.02296	0.159941	-12.6432	1.22e-36	1.36e-34	357.849	-0.416836	0.224786	-1.85746	0.0632452	0.171903	93.0121	98.3772	69.8038	115.775	93.2869	74.627	400.95	388.9	455.75	339.883	339.102	349.955	365.317	347.332	407.316	357.208	388.73	236.921	208.772
CCDC108	236.022	6.13553	0.485221	12.5758	2.87e-36	3.19e-34	167	2.83677	0.619478	4.57583	4.74e-06	6.04e-05	8.17689	42.1617	61.66	665.973	1111.88	917.007	0	0	0	12.5883	7.49397	5.32027	28.1013	2.13087	15.1325	19.2738	270.421	62.3477	69.5907
MAP7	95.2881	4.13169	0.325285	12.5618	3.42e-36	3.79e-34	44.9498	1.11945	0.451667	2.47546	0.0133066	0.0522546	169.67	202.376	324.588	94.532	173.968	125.509	5.56874	5.25541	16.3743	9.1551	9.36746	7.09369	18.7342	20.2433	18.9156	14.1341	71.3611	15.5869	36.0234
ANKH	7966.12	-1.93343	0.154243	-12.535	4.8e-36	5.29e-34	6371.12	1.88586	0.203353	9.27228	1.82e-20	1.9e-18	2635	2101.05	2211.62	4636.32	3901.24	4213.03	8666.36	8228.66	10143.9	11009	19236.4	18610.9	2001.05	1730.27	1856.25	2324.42	9151.12	6641.59	6345.85
CLIP2	1249.11	-1.65608	0.132185	-12.5295	5.15e-36	5.64e-34	1795.51	0.00227742	0.111294	0.0218827	0.982542	1	530.476	453.94	457.215	750.414	680.742	760.969	1924	1907.71	1344.05	2209.81	2000.89	1969.09	2172	2102.1	2175.29	2126.54	1765.25	2453.38	2216.26
BMP5	924.745	-3.51095	0.280346	-12.5102	6.57e-36	7.17e-34	1117.98	1.18813	0.185583	6.41072	1.45e-10	4.52e-09	130.83	199.565	75.6208	95.0631	99.1699	128.901	2189.91	3053.39	2677.19	710.665	904.897	831.735	1150.98	1385.07	827.242	970.114	2754.91	2311.54	2389.83
ZNF385B	3742.54	3.72617	0.299098	12.501	7.38e-36	8.01e-34	4432.91	1.0329	0.24924	4.17679	2.96e-05	0.00030751	6814.42	9631.12	5704.13	5466.92	7881.48	6223.44	225.534	362.623	300.195	460.044	870.55	970.062	6130.77	5152.45	4465.34	3826.49	9988.68	9989.66	10472.2
SELENBP1	2561.35	2.58454	0.206856	12.4965	7.8e-36	8.43e-34	1551.08	-0.331835	0.232126	-1.43589	0.151032	0.320684	5097.27	4224.6	4263.85	3359.07	4482.81	4971.74	570.796	693.714	560.818	1240.52	620.751	650.255	886.363	913.078	931.909	885.309	839.432	676.473	635.322
KIFC3	2337.11	-2.23264	0.178829	-12.4832	9.22e-36	9.93e-34	2274.17	-0.452851	0.217222	-2.09348	0.0363062	0.113775	514.122	519.994	708.508	1334.6	895.891	831.073	3220.13	2608	2175.05	6283.83	4738.69	4215.42	936.711	1062.24	1190.42	1075.48	798.118	723.234	805.615
HSPD1P11	106.545	3.66151	0.291626	12.4795	9.66e-36	1.04e-33	187.568	-0.870343	0.348957	-2.44777	0.0143742	0.055576	180.914	340.104	181.49	171.538	137.829	183.175	19.4906	13.1385	12.2807	4.57755	16.8614	17.1431	585.444	299.387	580.078	314.805	180.281	190.161	354.503
KLF8	600.557	2.58145	0.207681	12.4248	1.92e-35	2.05e-33	271.422	-0.65326	0.413765	-1.58743	0.112416	0.261262	1246.98	1145.39	1888.19	488.061	731.168	711.218	284.006	247.004	136.452	115.583	107.414	105.223	125.285	207.76	296.344	289.107	281.689	60.789	91.696
CYP39A1	122.027	2.31974	0.186711	12.4076	2.38e-35	2.52e-33	99.6617	-1.46873	0.301494	-4.87223	1.1e-06	1.62e-05	198.29	158.809	127.974	234.737	273.978	231.796	30.6281	38.1017	39.5711	37.7648	41.8413	50.8381	79.6204	102.282	59.2689	97.6539	18.7792	23.3804	42.5731
COBLL1	2418.05	2.9868	0.240719	12.4055	2.44e-35	2.58e-33	1652.73	-0.379632	0.257988	-1.4658	0.142703	0.308375	4349.08	5403.72	5412.12	3172.66	3625.58	3951.84	346.654	650.357	708.186	231.166	577.036	588.185	1730.57	1667.41	2005.05	2035.31	1385.91	1318.65	1572.75
RIMS3	392.488	2.1937	0.177774	12.337	5.72e-35	6.03e-33	167.888	1.57752	0.653074	2.36695	0.0179354	0.0659447	713.434	518.588	841.135	523.113	556.36	718.002	157.317	139.268	191.033	90.4066	131.144	130.051	10.538	6.39261	7.56624	2.56984	61.9715	4.67608	3.27486
RGS7BP	86.3104	5.68952	0.428689	12.3281	6.39e-35	6.7e-33	22.6248	-1.42925	0.961414	-1.58735	0.112434	0.261276	212.599	267.024	339.712	88.6902	44.5424	66.712	2.78437	9.19697	2.72904	1.14439	0	0.59114	1.17089	1.06544	1.26104	28.2682	5.63377	0	0.818714
TMEM173	1620.78	-1.99421	0.161987	-12.3156	7.46e-35	7.79e-33	1752.81	-2.59715	0.189181	-13.7301	6.71e-43	4.62e-40	270.86	269.834	413.006	1237.41	890.848	937.36	1656.7	1357.21	1299.02	4202.19	3570.88	3344.08	1868.74	2456.89	2261.05	2735.59	435.678	342.912	365.146
RP11-96H19.1	236.584	2.36842	0.192193	12.313	7.71e-35	8e-33	94.1537	0.961649	0.337904	2.85789	0.00426465	0.0211495	435.419	562.155	707.345	192.25	273.978	226.142	80.7468	118.247	96.881	60.6525	45.5883	39.6064	66.7407	45.8137	47.9195	61.6761	172.769	91.9629	69.5907
RP11-145A3.1	149.078	3.39949	0.275311	12.3128	7.73e-35	8e-33	69.9267	1.13882	0.978023	1.28101	0.200191	0.388122	171.715	229.078	232.679	293.687	399.201	315.469	34.8047	18.3939	28.6549	32.0429	13.1144	20.0988	0	1.06544	0	0	0	0	2.45614
C1QL1	1713.86	-2.60337	0.212323	-12.2607	1.47e-34	1.52e-32	1672.56	-3.14008	0.24839	-12.6311	1.42e-36	6.4e-34	420.088	306.375	613.11	577.814	493.328	422.886	2377.85	3798.35	3149.31	3703.24	2130.79	2573.23	2700.07	3437.1	3181.6	3502.69	206.572	417.73	436.375
CYTL1	22370.7	2.30893	0.188491	12.246	1.76e-34	1.81e-32	9178.25	-0.876356	0.200048	-4.37507	1.21e-05	0.000140487	51936.5	43862.2	55837.2	19833.7	26013.6	28669.2	8426.9	7214.37	7551.26	8002.7	6234.98	4866.27	6576.88	9311.91	8515.8	10610.9	5260.06	4471.89	4525.85
SLC24A2	53.9186	4.86554	0.379457	12.2384	1.94e-34	1.98e-32	17.7088	0.326975	0.881606	0.343996	0.73085	0.864209	117.543	118.053	125.647	57.8876	115.978	93.8491	4.17656	1.31385	5.45808	2.28877	1.87349	2.9557	0	1.06544	1.26104	5.13968	7.5117	0	0.818714
PELI2	267.679	2.59229	0.211676	12.2376	1.96e-34	1.99e-32	472.364	1.18392	0.30404	3.90328	9.49e-05	0.000855321	501.857	428.643	345.529	559.226	441.222	490.729	114.159	55.1818	54.5808	54.9306	88.0542	78.0306	478.894	446.418	330.392	449.722	1199.99	833.901	919.416
SLC13A5	5271.96	4.84201	0.399506	12.2261	2.25e-34	2.28e-32	1980.44	2.79477	0.491889	5.70763	1.15e-08	2.53e-07	12859.2	10561.5	23685.6	3397.31	5398.88	5840.13	180.984	219.413	121.442	436.012	250.423	312.713	989.401	982.332	199.244	149.051	5812.18	3482.12	4029.71
MYOM3	949.116	-3.68541	0.302183	-12.1871	3.64e-34	3.67e-32	274.729	-2.15908	1.01952	-3.31824	0.000905881	0.0058412	76.6583	237.511	72.1306	165.697	90.7656	78.0191	2674.39	2116.62	2316.96	1207.33	1184.05	1169.28	1.17089	1.06544	49.1806	0	0	0	0
ITGA5	43113.3	-2.10774	0.172859	-12.1849	3.74e-34	3.76e-32	29540	-0.298248	0.190901	-1.57895	0.114348	0.264441	6047.83	5180.26	4900.23	26016	23807.5	24330.7	28740.3	15129	18797.6	142622	120299	101489	2510.39	2430.26	3684.76	4002.52	2805.62	2331.8	2537.2
ABAT	1064.47	1.74135	0.143446	12.1412	6.39e-34	6.39e-32	751.396	0.0506635	0.136049	0.372636	0.709419	0.850316	1950.19	1952.08	1475.19	1369.65	1461.49	1578.47	556.874	608.314	710.915	347.894	419.662	342.861	718.926	617.953	607.821	566.649	578.401	659.327	707.369
LAMC2	2785.02	-3.05128	0.251406	-12.1397	6.51e-34	6.48e-32	1761.73	-1.09855	0.305785	-3.65236	0.00025984	0.00204587	244.285	268.429	385.084	732.358	1016.07	886.478	2388.99	1394	4496.1	5876.43	7437.77	8294.29	33.9558	37.2903	59.2689	68.1007	26.2909	14.0282	25.3801
CYS1	590.393	-2.71084	0.22368	-12.1225	8.03e-34	7.96e-32	434.388	0.776136	0.23215	3.34699	0.000816936	0.00535698	134.919	132.107	88.4181	227.302	141.191	202.397	916.058	1319.11	1065.69	1171.85	803.104	882.573	333.703	314.303	247.164	282.682	604.692	533.073	389.708
FGD3	269.394	4.68995	0.386751	12.1048	9.96e-34	9.84e-32	137.285	-1.70416	0.445326	-3.81976	0.000133582	0.00115307	533.542	410.373	1214.59	208.183	352.137	395.749	30.6281	38.1017	27.2904	16.0214	3.74699	2.36456	176.804	126.787	151.325	147.766	76.9949	28.0565	30.2924
ENAH	14401.1	3.06967	0.253873	12.0936	1.14e-33	1.12e-31	7841.4	0.531771	0.317248	1.66099	0.0967159	0.234849	23494.2	28866.7	27406.1	21794.4	27421.3	26044.8	3864.71	3099.38	3262.57	972.729	3029.44	3556.3	1821.9	1805.91	1798.24	2148.39	2905.15	2685.63	2649.36
CD81	16485.4	-1.5557	0.128723	-12.084	1.28e-33	1.26e-31	14614	-0.57101	0.173348	-3.29955	0.000968393	0.00615518	5449.9	4738.97	6879.16	12059.7	10011.1	9977.4	16709	14302.6	16035.9	38810.8	31402.2	31448.1	8343.75	10887.7	10177.9	12237.6	8399.95	6420.26	6153.45
PRB1	35513	7.49254	0.764045	12.0461	2.03e-33	1.99e-31	4835.04	-0.149771	0.886663	-0.332875	0.739229	0.869441	85405.6	76090.5	199015	14843.1	28789.5	21967.5	16.7062	0	2.72904	22.8878	2.49799	0	1.17089	6.39261	3.78312	10.2794	3.75585	4.67608	4.09357
ANK1	162.808	4.2289	0.349573	12.0319	2.42e-33	2.35e-31	103.226	-1.0153	0.673667	-1.57415	0.115452	0.266157	204.422	174.268	597.986	287.845	259.691	339.214	12.5297	30.2186	16.3743	6.86632	11.8655	12.414	25.7596	10.6544	52.9637	19.2738	0	34.2912	2.45614
EVC2	691.968	-1.02318	0.0852162	-12.007	3.27e-33	3.16e-31	863.673	-0.628319	0.110041	-5.70903	1.14e-08	2.51e-07	341.385	330.266	388.574	577.814	547.956	560.833	796.33	731.816	757.309	1078.01	1066.02	1127.31	1013.99	1053.72	1263.56	1228.38	670.419	712.323	815.439
PGBD5	200.779	2.22272	0.185588	11.9691	5.16e-33	4.98e-31	179.657	0.10518	0.190514	0.552022	0.580934	0.760373	260.638	243.132	332.731	322.896	415.169	417.233	44.55	49.9264	84.6003	73.2408	94.2991	70.9369	131.139	153.423	157.63	132.347	129.577	155.869	173.567
PALD1	357.937	-2.15608	0.180121	-11.9667	5.31e-33	5.1e-31	889.802	-0.0299661	0.228784	-0.124481	0.900934	0.95896	113.454	88.5395	136.117	201.279	121.021	113.071	509.54	563.643	484.405	615.68	765.634	582.865	1227.09	1513.98	1141.24	1201.4	1230.04	1348.27	1160.94
FZD8	3245.31	-1.88483	0.157572	-11.9649	5.43e-33	5.19e-31	3058.3	-0.247928	0.168184	-1.47635	0.13985	0.304117	1189.74	1028.74	1036.59	2010.66	1496.79	1618.05	5380.8	5306.65	4788.1	5027.29	4487.64	5572.68	2372.22	2742.43	2622.96	3034.98	2015.01	2478.32	2300.59
KRT6A	278.344	7.07401	0.569131	11.9536	6.22e-33	5.93e-31	191.853	0	1.20355	0	1	1	47.0171	42.1617	251.294	601.181	1276.6	1111.49	0	0	0	0	6.24498	4.13798	0	0	0	0	0	0	0
PAX1	121.49	-4.60233	0.377818	-11.9485	6.61e-33	6.27e-31	82.1753	1.9442	0.571901	3.36652	0.000761244	0.00504885	6.13267	2.81078	5.81698	7.96618	7.5638	11.3071	73.7859	42.0433	110.526	512.686	350.343	326.901	5.85444	5.32718	0	2.56984	7.5117	31.1739	8.18714
FAM105A	256.677	3.38236	0.284079	11.9232	8.96e-33	8.48e-31	158.101	-0.681958	0.351744	-1.94858	0.0513452	0.148115	492.658	493.291	432.783	428.58	473.158	476.03	59.864	63.0649	87.3293	35.476	23.1064	14.7785	84.304	54.3372	99.6222	172.179	61.9715	65.4651	61.4036
RFFL	1646.15	-1.9958	0.167616	-11.9107	1.04e-32	9.81e-31	1419.45	-0.0890126	0.210483	-0.428091	0.668585	0.822111	406.8	508.751	502.587	858.754	902.614	853.687	2433.54	2383.33	2065.88	2049.6	3444.73	3343.49	868.799	579.597	834.809	745.253	659.151	611.008	857.193
LRRC38	162.994	8.34026	0.540947	11.8855	1.41e-32	1.32e-30	78.5301	0.575575	0.519784	1.1148	0.264934	0.467073	351.606	268.429	342.038	386.625	303.393	301.9	0	1.31385	0	0	0.624498	0	4.68356	9.58892	11.3494	15.419	33.8026	7.79347	8.18714
FAM117A	563.327	1.49123	0.125531	11.8782	1.54e-32	1.44e-30	466.664	0.866691	0.160568	5.39878	6.71e-08	1.28e-06	964.873	983.772	909.776	670.221	756.38	713.479	293.751	329.777	334.308	339.883	226.068	237.638	366.488	320.696	374.529	344.358	570.889	618.801	731.112
PDCD6	5972.68	1.40271	0.118372	11.8499	2.15e-32	2.01e-30	4880.05	0.891428	0.189764	4.70092	2.59e-06	3.49e-05	7611.66	7076.13	7493.44	8394.23	11206.2	10317.8	2514.29	2996.9	2985.57	4395.59	3274.86	3405.56	3548.96	4639.97	3426.25	3781.52	9314.5	6286.21	5922.58
SOX11	571.881	-3.03956	0.257282	-11.8081	3.55e-32	3.29e-30	2325.69	-0.191865	0.153309	-1.24441	0.213347	0.40547	151.273	174.268	52.3528	139.674	91.6061	98.3719	1525.84	1112.83	841.909	936.109	859.309	879.026	3561.84	3284.74	3901.66	4123.31	3209.37	3385.48	3171.7
CPM	4163.19	2.63637	0.223516	11.7938	4.2e-32	3.87e-30	2471.55	1.79316	0.254295	7.04964	1.79e-12	7.44e-11	5247.52	6880.78	3736.83	8902.47	8121	10370.9	845.057	1053.71	633.138	813.659	1863.5	1489.67	573.736	598.775	561.163	598.773	2773.69	1900.05	1480.23
OLFM2	280.715	-3.21375	0.272274	-11.7711	5.5e-32	5.02e-30	285.876	-1.81278	0.348194	-5.23541	1.65e-07	2.9e-06	55.194	44.9724	52.3528	32.9269	36.9786	33.9214	1019.08	873.712	616.763	240.321	176.733	185.618	45.6647	76.7114	103.405	150.336	18.7792	32.7326	24.5614
SRPX	3357.94	-2.31615	0.196737	-11.7715	5.47e-32	5.02e-30	2637.1	1.06293	0.125893	8.44154	3.13e-17	2.29e-15	901.502	801.071	518.875	1525.26	1506.04	1318.41	4828.1	2234.86	3942.1	8305.96	7137.38	7275.76	1023.36	1220.99	934.431	900.729	2251.63	2228.93	1935.44
DOCK9	675.954	-1.98347	0.16853	-11.7682	5.69e-32	5.18e-30	863.22	-1.42926	0.373589	-3.87681	0.000105837	0.0009397	204.422	252.97	250.13	316.523	216.829	384.442	973.138	789.626	1148.93	1066.57	1388.26	1119.62	236.52	299.387	206.811	213.297	153.99	70.1412	36.8421
COL6A1	70623.8	-1.72734	0.147023	-11.7504	7.03e-32	6.37e-30	61852.2	0.051266	0.211105	0.235244	0.814019	0.911374	22180.8	19529.3	22579.2	54410.1	35670.9	43767.6	90469.8	58704.3	78749.2	136219	130459	154746	24125	28146.7	37073.3	41608.3	37350	32559.5	31773.5
GPSM1	8708.07	2.69551	0.229284	11.7454	7.46e-32	6.73e-30	5107.69	0.568961	0.203982	2.79217	0.00523551	0.0249971	29751.6	22222	18139.7	6219.46	6657.83	9093.18	2614.53	3083.61	2528.46	1825.3	1540.63	820.503	2218.83	2456.89	2001.27	2341.12	3650.68	3045.69	3371.46
SNTB1	314.818	-4.50456	0.383153	-11.7399	7.95e-32	7.16e-30	340.39	1.69174	0.487073	3.47156	0.000517452	0.00364348	16.3538	9.83772	20.9411	43.5485	29.4148	11.3071	758.741	580.723	897.855	201.412	497.724	709.96	88.9875	99.0855	192.939	242.85	854.456	316.415	421.638
IRX5	953.491	3.32518	0.284191	11.7276	9.2e-32	8.24e-30	487.228	1.40833	0.354809	3.95262	7.73e-05	0.000711548	1556.68	1385.71	1817.22	1337.79	2325.45	1941.43	61.2562	115.619	107.797	377.648	249.174	166.111	21.076	25.5705	27.7429	28.2682	99.53	45.2021	65.4971
H1F0	6388.14	-1.31361	0.112015	-11.7264	9.33e-32	8.33e-30	6174.54	-1.19246	0.183146	-6.51718	7.16e-11	2.36e-09	3059.18	3323.74	3131.86	3677.19	4654.26	3913.39	7633.35	7356.26	7106.43	11302	9102.68	12397.4	4516.12	5474.21	5692.34	6477.28	2955.85	2193.08	2087.72
CHI3L2	2420.31	-3.01908	0.258493	-11.692	1.4e-31	1.25e-29	1529.33	-2.79201	0.490987	-5.71919	1.07e-08	2.38e-07	146.162	157.403	167.529	755.725	1049.69	991.634	1890.59	643.788	2009.94	8125.15	4912.3	8193.8	85.4749	96.9547	147.542	160.615	43.1923	1.55869	5.731
NAAA	1779.57	2.23045	0.190826	11.6851	1.52e-31	1.35e-29	618.947	0.280116	0.282196	0.978856	0.327651	0.536491	4219.28	3669.47	3911.34	1552.34	2238.89	2236.55	587.502	610.942	618.128	694.643	512.712	503.061	128.798	140.637	196.722	186.313	307.979	132.489	158.012
NOX4	321.133	-3.17648	0.271779	-11.6781	1.65e-31	1.46e-29	126.317	-3.77622	0.622335	-5.21277	1.86e-07	3.23e-06	77.6805	81.5125	70.9672	49.9214	47.0637	40.7056	657.112	332.405	1101.17	465.766	310.375	618.924	32.7849	42.6174	20.1766	32.123	0	3.11739	0.818714
MEOX1	70.5051	-5.50184	0.444564	-11.6729	1.75e-31	1.54e-29	283.757	-4.29196	0.554213	-7.39768	1.39e-13	6.72e-12	0	2.81078	3.49019	3.18647	1.68085	2.26142	75.178	210.216	79.1422	199.123	121.777	147.194	63.228	49.01	153.847	160.615	9.38962	1.55869	2.45614
C1orf110	80.2353	4.83021	0.403354	11.673	1.75e-31	1.54e-29	39.1683	0.285466	0.48911	0.630384	0.528443	0.719184	263.705	227.673	120.993	60.543	149.595	108.548	5.56874	9.19697	12.2807	2.28877	1.249	1.18228	36.2976	26.6359	49.1806	41.1174	73.239	17.1456	53.2164
ALDH3B1	1762.97	2.68005	0.230144	11.6623	1.99e-31	1.74e-29	755.276	2.17624	0.215793	10.0806	6.73e-24	9.96e-22	2962.08	2650.56	3618.16	2453.58	3312.11	3211.22	384.243	265.398	263.353	757.584	607.636	669.762	126.456	124.656	59.2689	97.6539	544.598	434.875	429.006
MTURN	2854.8	1.76032	0.150978	11.6576	2.1e-31	1.83e-29	1566.99	0.456887	0.186614	2.44687	0.0144102	0.0556567	6301.32	5742.42	5856.54	2539.62	3038.13	3151.29	1488.25	1442.61	1981.29	661.456	950.485	1104.25	1066.68	1033.47	986.133	940.561	1742.71	1218.9	1197.78
STIM1	6054.41	2.35496	0.202103	11.6557	2.15e-31	1.86e-29	3613.58	1.60343	0.25833	6.20041	5.63e-10	1.6e-08	8190.18	7826.61	9245.51	9136.68	13025.7	13310.7	1365.73	1325.68	1571.93	1433.92	3169.95	3050.28	1028.04	790.553	703.66	778.661	2623.46	2383.24	2607.6
CD40	133.466	2.02675	0.173791	11.6528	2.22e-31	1.92e-29	92.4118	-3.4619	0.666347	-4.3413	1.42e-05	0.000161294	182.958	205.187	162.875	232.081	252.967	251.018	58.4718	49.9264	54.5808	60.6525	41.2168	49.6558	7.02533	25.5705	30.265	17.9889	0	0	1.63743
COL6A2	93948.4	-2.02369	0.1738	-11.6508	2.27e-31	1.96e-29	88650.1	-0.292786	0.21074	-1.39547	0.162873	0.337694	26499.3	23458.7	21472.8	66894.1	42084.2	50118.8	146178	99027.7	117605	170577	168775	194690	46390.6	57639	62653.5	73774.9	56931.2	47460.6	42463.4
SMAD6	1474.46	1.60012	0.137557	11.6317	2.84e-31	2.44e-29	999.863	-0.0107308	0.142169	-0.0742983	0.940773	0.982653	2841.47	2435.54	2380.31	2091.39	1626.22	1990.05	732.29	810.647	624.951	794.205	736.907	629.565	796.204	934.387	948.302	1035.64	927.694	885.338	950.527
MSC	166.733	-3.87883	0.332348	-11.6178	3.35e-31	2.85e-29	306.919	-1.81083	0.511505	-3.61026	0.00030589	0.00235545	12.2653	15.4593	6.98038	33.989	26.8935	20.3528	371.714	115.619	120.078	490.942	304.13	482.371	5.85444	19.1778	36.5702	35.9778	1.87792	4.67608	9.00585
RTN1	73.5406	4.79854	0.399637	11.6177	3.35e-31	2.85e-29	29.6154	0.386255	0.768489	0.472279	0.636727	0.800505	183.98	191.133	261.764	71.6956	104.212	45.2285	1.39219	6.56926	8.18713	4.57755	3.74699	0	9.36711	6.39261	10.0883	0	9.38962	4.67608	11.462
AL121963.1	242.634	7.36413	0.580121	11.6166	3.39e-31	2.88e-29	38.1429	0.176621	1.17329	-0.164448	NA	NA	960.785	529.831	1373.97	9.55942	7.5638	27.1371	1.39219	0	1.36452	0	0	0	0	1.06544	0	0	0	0	0
IL4R	1174.63	-2.0319	0.174985	-11.6137	3.51e-31	2.97e-29	775.737	-0.437552	0.262542	-1.68714	0.091576	0.225725	408.845	427.238	309.463	650.571	463.913	499.775	2156.5	2110.05	1698.83	1571.24	2057.09	1742.09	180.317	160.881	370.746	281.397	210.327	152.752	182.573
SERPINE2	7898.66	-2.16417	0.186306	-11.6123	3.57e-31	3.01e-29	5701.27	-0.0909306	0.133887	-0.685116	0.493271	0.689794	1875.57	1843.87	1565.93	3497.15	3844.09	3878.34	9194	4167.54	8473.68	16722.9	19195.2	20525.6	1711.84	1852.79	1424.97	1575.31	1534.26	1284.36	1793.8
C20orf112	1437.74	-1.69715	0.146639	-11.5731	5.64e-31	4.74e-29	1011.98	0.20352	0.163801	1.24053	0.214779	0.407243	889.237	876.962	554.94	629.328	556.36	524.65	2702.23	2836.61	2175.05	1618.16	1996.52	1892.83	805.572	596.644	895.338	850.617	959.619	762.201	993.919
ANGPT1	1549.08	3.07494	0.265699	11.5701	5.84e-31	4.89e-29	1131.03	0.804691	0.309252	2.61251	0.00898798	0.0384839	3392.39	2754.56	3400.61	1746.19	2676.75	2755.55	162.886	386.273	427.095	155.637	360.96	370.054	1088.93	1027.08	622.954	588.493	1295.77	1607.01	1508.89
CPN2	73.6078	2.8247	0.243261	11.5602	6.56e-31	5.47e-29	46.2132	0.660771	0.642042	1.00137	0.316646	0.524454	75.6362	54.8101	61.66	191.719	200.861	195.613	15.314	11.8247	9.55165	26.3209	18.1104	21.8722	7.02533	2.13087	3.78312	5.13968	15.0234	4.67608	4.09357
CPNE5	998.175	3.45854	0.301199	11.5502	7.36e-31	6.12e-29	569.068	3.0841	0.250539	12.309	8.11e-35	3.25e-32	2475.55	1987.22	2462.91	1014.89	1520.32	1350.07	476.128	329.777	176.023	66.3745	55.5803	63.252	144.019	154.488	104.666	147.766	1716.42	865.075	1015.21
SBK1	306.196	3.5332	0.306296	11.5402	8.27e-31	6.86e-29	162.382	1.61375	0.431156	3.73262	0.000189496	0.0015579	611.223	431.454	1263.45	217.742	428.616	421.755	80.7468	102.481	53.2163	19.4546	19.9839	24.2368	37.4684	27.7013	60.5299	73.2404	281.689	93.5216	99.8831
COL11A2	56987.8	2.16986	0.188257	11.532	9.1e-31	7.52e-29	97.6369	-1.20615	1.09373	-0.958548	0.337786	0.545991	85298.2	74924.1	84340.4	84491.4	117057	110780	11610.8	18709.3	13188.1	21251.3	27579.1	34623.7	758.736	127.852	50.4416	70.6706	0	148.076	122.807
FBXL22	128.858	3.74537	0.323218	11.5292	9.4e-31	7.74e-29	53.2088	1.21125	0.465297	2.59533	0.00945006	0.0400184	189.091	244.537	536.326	134.363	169.765	174.13	16.7062	13.1385	34.113	16.0214	6.86947	11.2317	16.3924	10.6544	6.3052	15.419	48.826	21.8217	19.6491
VAV3	159.747	3.75805	0.327359	11.4852	1.56e-30	1.28e-28	173.875	3.63075	0.494129	7.34188	2.11e-13	1e-11	366.938	323.239	430.457	144.984	284.063	222.75	40.3734	56.4957	23.1969	9.1551	9.99196	5.32026	57.3736	30.8976	12.6104	47.542	893.892	288.358	368.421
DTX4	162.496	1.76912	0.154106	11.4757	1.75e-30	1.43e-28	263.786	0.278095	0.249652	1.11589	0.26447	0.466628	428.265	407.563	374.614	99.8428	81.521	114.202	123.905	115.619	125.536	19.4546	28.1024	31.3304	234.178	291.929	218.16	269.833	326.759	299.269	299.649
MEF2C	6477.36	3.19534	0.2785	11.4708	1.85e-30	1.51e-28	4120.1	1.95374	0.362953	5.38671	7.18e-08	1.36e-06	11199.3	12231.1	20938.8	6310.28	10966.7	8945.06	1645.56	1391.37	1203.51	390.236	1162.81	1343.66	1937.82	1859.19	2007.58	2102.13	11943.6	5876.27	5935.68
GLT1D1	83.1114	3.47517	0.301215	11.4697	1.87e-30	1.52e-28	59.5778	0.132757	0.317385	0.421939	0.67307	0.825173	121.631	112.431	233.843	116.837	163.042	170.738	11.1375	22.3355	17.7388	5.72194	11.241	10.6405	45.6647	63.9261	37.8312	32.123	54.4598	54.5543	41.7544
DKK3	7023.65	-1.79615	0.156765	-11.463	2.02e-30	1.64e-28	4648.78	-1.21322	0.168525	-7.2098	5.6e-13	2.49e-11	2237.4	1947.87	2416.37	4764.84	4115.55	3914.52	10593.1	8647.78	10117.9	10803	11162.3	13563.1	1811.36	2137.26	2615.4	2446.49	884.502	1159.67	856.375
VN1R40P	175.6	8.23161	0.577878	11.4628	2.03e-30	1.64e-28	19.7248	1.80254	1.08781	1.71113	0.0870563	0.217404	553.984	491.886	729.449	79.1307	122.702	128.901	0	0	0	1.14439	0	0	0	0	0	0	3.75585	0	0.818714
CCDC109B	522.149	-4.27982	0.375052	-11.4577	2.15e-30	1.73e-28	339.222	-1.92521	0.451408	-4.3114	1.62e-05	0.000182001	8.17689	11.2431	41.8823	99.8428	84.8827	62.1892	1078.94	403.353	986.549	1184.44	1051.65	1252.63	45.6647	35.1594	110.972	165.755	24.413	31.1739	11.462
FAM198A	423.584	-4.58254	0.403244	-11.4355	2.78e-30	2.23e-28	1447.46	0.960355	0.263839	3.66853	0.000243948	0.00193665	61.3267	43.567	36.0653	18.5878	17.6489	6.78427	612.562	1043.2	328.85	843.413	723.793	1347.21	2300.8	2346.09	1678.44	1723.08	3190.59	4961.32	3753.8
DAAM2	4004.82	1.78804	0.156494	11.4264	3.09e-30	2.46e-28	3799.89	-0.0737079	0.179995	-0.403426	0.686635	0.834347	7151.71	6847.05	10732.3	3702.15	4562.65	4262.78	2408.48	2714.42	2210.52	904.066	1365.78	1195.88	5415.36	4679.39	6052.99	5870.8	5308.89	5026.78	5361.76
HSD11B2	57.4833	3.3628	0.291838	11.4241	3.17e-30	2.52e-28	36.4816	-1.43326	0.527503	-2.73138	0.00630691	0.028992	100.167	85.7287	112.849	71.6956	129.425	131.163	9.7453	13.1385	8.18713	12.5883	6.24498	8.86711	16.3924	25.5705	16.3935	28.2682	1.87792	7.79347	10.6433
ARHGEF26	818.488	1.75912	0.154298	11.3993	4.22e-30	3.34e-28	664.056	-0.355759	0.193875	-1.83775	0.0660993	0.177797	1438.11	1493.93	1392.59	1003.21	1073.22	1217.78	377.282	430.944	339.766	251.765	452.136	351.137	763.419	522.063	585.123	573.074	413.143	490.988	521.521
FAXC	910.047	2.38168	0.209153	11.387	4.85e-30	3.84e-28	531.922	-0.330242	0.209563	-1.57575	0.115083	0.265444	1812.2	1696.3	1799.77	1037.73	1489.23	1377.21	165.67	289.048	323.392	390.236	277.901	261.875	422.691	517.802	459.019	468.996	478.871	307.062	331.579
LTBP1	19455.1	-3.43074	0.301975	-11.3727	5.72e-30	4.51e-28	9644.48	-2.03347	0.289563	-7.03937	1.93e-12	7.96e-11	2644.2	2528.29	2309.34	4381.4	2461.6	2511.31	60859.4	54288.4	39860.4	13553	21477.7	26586	6252.55	7051.05	8027.78	7807.17	2182.15	1497.9	1530.18
MET	1312.75	-2.26061	0.199096	-11.3482	7.57e-30	5.94e-28	1142.47	-0.685073	0.29054	-2.38411	0.0171203	0.0636591	188.068	227.673	245.477	693.058	636.2	578.924	971.746	997.214	961.987	1876.8	4006.15	4369.71	240.032	235.461	282.473	322.515	103.286	202.63	188.304
JPH1	1342.73	1.79132	0.158129	11.3273	9.62e-30	7.53e-28	1163.13	3.00601	0.247955	12.128	7.5e-34	2.95e-31	2436.71	1978.79	2495.48	1716.98	1922.89	1996.84	661.288	575.468	616.763	376.503	678.829	656.166	373.514	346.267	332.915	318.66	3887.3	2255.43	2322.69
DPT	2464.62	-3.30144	0.292466	-11.3042	1.25e-29	9.76e-28	1172.79	-3.9403	0.507761	-7.44055	1e-13	4.98e-12	261.661	251.565	444.417	450.886	630.317	569.879	5915.4	4648.41	4738.98	6258.65	2155.77	3249.5	72.5951	104.413	61.791	118.213	13.1455	0	1.63743
DSTN	35046.8	1.55435	0.13761	11.2966	1.36e-29	1.06e-27	21058.3	0.22704	0.141804	1.59922	0.109772	0.257314	51463.3	56159.3	53547.6	42479.4	54654.4	55219.4	13983.1	14139.7	17793.4	22048.9	18757.4	20315.1	8143.53	9943.71	9953.39	11703	11975.5	11191.4	11733
PCGF2	1041.25	-1.50405	0.133239	-11.2867	1.53e-29	1.18e-27	1253.37	-0.31994	0.155218	-2.05786	0.0396032	0.121533	870.839	657.722	603.803	391.936	315.159	353.913	2338.87	2254.57	1838.01	1034.53	865.554	970.062	1734.09	1979.58	1829.77	1959.5	1166.19	1619.48	1711.11
SCRG1	47541.3	3.06243	0.271549	11.2868	1.52e-29	1.18e-27	25448.5	1.01232	0.284553	3.55149	0.000383056	0.00284339	57784	58978.5	74926.2	70580.9	129213	122111	8307.17	10294	14319.3	11109.7	5786.59	7084.23	4249.15	5641.48	4807.09	6077.67	14294.8	9183.82	8237.9
CAB39L	719.422	1.60627	0.142415	11.2776	1.69e-29	1.3e-27	421.065	0.331474	0.327124	1.01511	0.310054	0.517379	1221.42	1246.58	1234.36	846.539	1024.48	947.537	371.714	365.251	436.647	218.578	342.225	377.739	206.076	256.77	286.256	456.146	617.837	224.452	303.743
SPAG17	200.126	1.588	0.14087	11.2699	1.85e-29	1.42e-27	224.886	-1.44654	0.252295	-5.72074	1.06e-08	2.36e-07	319.921	354.158	290.849	312.274	248.765	273.632	105.806	118.247	111.891	107.572	76.8132	81.5774	463.672	313.238	523.332	372.627	180.281	102.874	171.93
LYPD1	287.584	-6.5137	0.54992	-11.2682	1.88e-29	1.44e-27	155.169	-0.735024	0.693788	-1.1	0.271332	0.474142	10.2211	0	2.32679	1.06216	0	0	2135.61	733.13	450.292	41.1979	28.1024	49.0647	2.34178	28.7668	21.4377	35.9778	0	24.9391	11.462
LTBP2	18379.5	-3.63958	0.323722	-11.2675	1.9e-29	1.45e-27	7202.21	-3.35974	0.482343	-7.0441	1.87e-12	7.72e-11	1555.65	1326.69	2803.78	3215.68	2313.68	2740.85	47302.3	47928	49661.7	11811.2	23478.6	26416.3	1631.05	1621.59	2833.56	3552.8	443.19	59.2303	117.076
COL4A5	12339.8	2.71502	0.24184	11.2647	1.96e-29	1.49e-27	5693.91	-1.29106	0.209659	-6.16766	6.93e-10	1.94e-08	22813.5	26313.1	25740.1	16011.5	16879	18281.3	5416.99	7525.75	4421.05	1329.78	1641.8	1703.67	2605.23	2640.15	3168.99	3191.74	1605.62	971.066	957.077
TLN2	3477.1	1.71096	0.15213	11.2464	2.41e-29	1.83e-27	1496.71	0.697423	0.272673	2.54736	0.010854	0.0445683	8033.8	7802.72	8462.54	1962.34	3032.24	2746.5	2075.75	3158.5	2106.82	695.788	820.59	827.597	539.78	603.037	455.236	889.164	1230.04	695.177	1112.63
DERA	1622.08	1.77277	0.157739	11.2383	2.65e-29	2e-27	1037.05	-0.135053	0.153274	-0.883089	0.377188	0.585391	3203.3	2954.13	2706.06	1790.8	2222.08	2267.08	584.718	651.671	815.984	815.948	711.927	741.29	720.097	925.864	715.01	946.986	850.7	769.994	645.147
ST6GALNAC2	518.639	3.8686	0.347012	11.2377	2.66e-29	2.01e-27	235.474	-0.19573	0.358618	-0.582476	0.560246	0.744611	868.795	750.477	1275.08	931.512	959.763	1007.46	33.4125	18.3939	24.5614	146.482	126.149	81.5774	25.7596	13.8507	22.6987	11.5643	15.0234	17.1456	15.5556
PPP1R1C	99.5718	2.88656	0.25618	11.2356	2.73e-29	2.05e-27	61.3265	-0.32312	0.531492	-0.64537	0.518687	0.711361	123.675	148.971	154.732	209.245	217.669	202.397	12.5297	32.8463	20.4678	37.7648	16.2369	18.3254	7.02533	13.8507	2.52208	11.5643	11.2675	4.67608	5.731
HS3ST3B1	4445.55	1.84187	0.164006	11.2304	2.89e-29	2.16e-27	2345.7	2.49067	0.225034	11.0685	1.78e-28	4.32e-26	8407.89	8076.77	5709.95	6413.31	6609.08	6593.18	1837.69	1598.96	2764.52	1481.98	1919.71	1933.62	617.058	663.766	372.007	331.509	3329.56	2694.98	2483.98
C2orf40	734.688	-2.94582	0.262627	-11.2164	3.39e-29	2.53e-27	2151.17	-1.06497	0.239118	-4.43244	9.32e-06	0.000110912	183.98	133.512	107.032	192.782	153.797	166.215	1428.38	1660.71	1903.51	1459.09	635.114	792.128	4853.33	5932.35	5319.07	6284.54	2343.65	2824.35	2825.38
RUNX3	1159.81	3.25233	0.290356	11.2097	3.66e-29	2.72e-27	1951.24	2.86625	0.426232	6.74671	1.51e-11	5.46e-10	2876.22	1536.09	2229.07	2034.03	2003.57	1966.31	289.575	85.4004	102.339	249.476	254.171	291.432	1409.75	1380.8	359.396	256.984	6721.09	6501.31	6838.72
PRKAR2B	523.483	2.81862	0.25179	11.2032	3.93e-29	2.92e-27	488.89	0.202178	0.191391	1.05481	0.291511	0.496349	683.792	677.397	1095.92	1015.42	1110.2	909.092	77.9624	53.868	113.255	116.728	213.578	214.584	366.488	354.79	330.393	282.682	394.364	419.288	342.222
EPHB6	137.807	2.41509	0.215626	11.1895	4.59e-29	3.39e-27	225.285	-1.36033	0.265748	-5.14053	2.74e-07	4.56e-06	219.754	178.484	205.921	242.703	295.829	252.149	43.1578	43.3571	65.497	35.476	29.9759	41.3798	72.5951	100.151	114.755	132.347	56.3377	35.8499	31.9298
FXYD2	132.314	-3.45658	0.308113	-11.1796	5.13e-29	3.79e-27	74.668	-1.83141	0.41861	-4.35393	1.34e-05	0.000153381	22.4864	32.3239	10.4706	27.6161	13.4468	14.6993	336.909	281.165	216.959	327.295	154.251	150.15	100.696	64.9916	73.1403	110.503	16.9013	18.7043	32.7486
EMID1	234.976	2.70501	0.241805	11.1786	5.19e-29	3.82e-27	591.347	0.896205	0.237836	3.78482	0.000153818	0.00130075	422.132	337.293	574.718	285.72	442.903	390.096	83.5311	76.2035	46.3937	81.2515	38.0943	41.3798	844.211	998.313	678.44	688.717	1342.72	1717.68	1461.4
IRX3	545.448	3.54456	0.317678	11.1742	5.45e-29	4e-27	303.977	1.88536	0.46073	4.0722	4.66e-05	0.000454288	926.033	823.558	949.331	888.495	1386.7	1074.18	77.9624	115.619	135.088	91.551	22.4819	54.3849	11.7089	24.505	17.6546	24.4135	114.553	74.8173	41.7544
HOXB6	350.898	5.52322	0.491068	11.1689	5.79e-29	4.23e-27	55.3393	-0.302765	0.965619	-0.614535	0.538862	0.727569	950.564	905.07	1569.42	154.544	321.882	231.796	9.7453	59.1234	2.72904	3.43316	1.87349	0.591141	0	0	0	3.85476	0	0	0.818714
ENPEP	589.727	2.85667	0.255674	11.1683	5.83e-29	4.25e-27	427.446	-2.55712	0.532614	-4.81482	1.47e-06	2.1e-05	988.382	1025.93	1148.27	1064.28	1009.35	1018.77	114.159	168.173	130.994	48.0643	172.361	187.983	39.8102	21.3087	22.6987	57.8214	1.87792	7.79347	4.09357
RAB15	845.171	-2.2351	0.200275	-11.161	6.33e-29	4.59e-27	971.163	-0.511719	0.177096	-2.88887	0.00386627	0.0195048	310.722	222.051	219.882	389.812	289.105	288.332	1570.39	1877.5	1616.96	1082.59	1206.53	1068.19	1021.01	1266.8	1404.8	1296.48	651.64	943.009	1016.84
CERK	4134.48	-1.10316	0.0988592	-11.1585	6.51e-29	4.71e-27	4068.43	-0.0731038	0.131737	-0.554378	0.57932	0.759316	2367.21	2124.95	2374.49	3214.09	2874.25	2705.79	4751.53	4628.7	4728.07	5590.33	7129.89	7124.43	4128.55	4161.59	4010.11	3963.98	3239.42	4284.85	4064.1
PLCL1	313.045	3.40474	0.30595	11.1549	6.78e-29	4.89e-27	160.994	-1.13282	0.44716	-2.56739	0.0102467	0.0426087	604.068	590.263	1424	152.42	321.041	306.423	89.0999	105.108	117.349	17.1658	11.8655	17.7342	42.152	58.599	71.8793	115.643	45.0702	14.0282	35.2047
NCF2	107.29	-2.90096	0.259766	-11.1455	7.54e-29	5.42e-27	88.9558	1.66183	1.05173	1.61414	0.106497	0.251849	0	14.0539	9.30717	32.9269	52.1062	47.4899	79.3546	72.2619	72.3196	307.84	284.146	315.669	3.51267	0	0	24.4135	101.408	1.55869	0.818714
FXYD6	5608.38	-1.96708	0.176606	-11.139	8.1e-29	5.81e-27	6765.41	-0.0112408	0.218119	-0.04517	0.963972	0.994052	2144.39	2112.3	1583.38	3209.31	2398.57	2183.4	9369.41	8199.76	7428.45	12689	7003.74	8978.83	8123.63	9618.75	8180.37	9202.59	8144.56	9115.24	8902.69
ENPP5	639.678	3.06925	0.27578	11.1373	8.26e-29	5.91e-27	298.701	3.00107	0.408658	7.31304	2.61e-13	1.22e-11	1433	1346.36	1005.17	759.443	1162.3	1180.46	69.6093	114.305	106.433	86.9734	211.08	200.988	16.3924	22.3742	7.56624	11.5643	191.548	88.8455	98.2457
C3orf55	103.825	3.16376	0.283406	11.1304	8.92e-29	6.36e-27	60.304	1.08218	0.358671	3.01876	0.00253815	0.0138058	233.041	186.917	102.379	171.007	193.297	238.58	15.314	7.88312	17.7388	33.1872	19.3594	27.1925	19.9051	17.047	25.2208	17.9889	60.0936	40.526	31.9298
NR5A2	190.442	2.07061	0.186021	11.1279	9.18e-29	6.53e-27	81.9057	0.982816	0.614236	1.55909	0.118974	0.271888	417.021	345.725	382.757	212.963	222.712	258.933	116.944	88.0281	90.0584	66.3745	52.4578	31.3304	5.85444	11.7198	2.52208	14.1341	18.7792	17.1456	17.193
EPDR1	942.722	2.69524	0.242729	11.1182	1.02e-28	7.26e-27	639.746	1.26098	0.309043	4.07162	4.67e-05	0.000455226	1467.75	1534.68	1550.81	1449.84	1922.89	1831.75	132.258	137.955	203.314	216.289	381.568	483.553	148.703	203.498	240.859	283.967	788.728	400.584	410.994
HSPB8	3319.09	1.73367	0.156176	11.093	1.36e-28	9.59e-27	2750.38	0.562479	0.299833	1.86909	0.0616109	0.16873	1504.55	1336.52	1985.92	7472.28	9763.19	9201.73	630.66	455.907	559.454	2292.21	2032.12	2594.52	352.438	478.381	809.588	1128.16	1198.12	858.84	1023.39
GALNT5	5300.94	2.49747	0.225274	11.0924	1.37e-28	9.63e-27	4309.29	-0.320236	0.272318	-1.16539	0.243859	0.442989	9117.23	9581.94	13651.3	6002.25	7763.83	7836.96	2047.91	2117.93	2323.78	545.873	1161.57	1460.71	6655.33	5599.93	6134.96	5272.02	3635.66	5240.33	5322.46
FOLR1	123.541	4.82969	0.430313	11.0811	1.55e-28	1.09e-26	63.6096	1.77968	0.470425	3.77595	0.0001594	0.00133974	179.892	171.457	280.378	162.51	351.297	295.116	0	15.7662	13.6452	3.43316	2.49799	6.50255	9.36711	15.9815	11.3494	5.13968	60.0936	32.7326	24.5614
CRYBA2	125.498	6.84624	0.543921	11.0556	2.06e-28	1.44e-26	52.4126	4.66035	1.02418	4.57408	4.78e-06	6.08e-05	164.56	111.026	404.862	178.442	359.701	280.416	0	0	0	5.72194	1.249	0	0	0	0	0	46.9481	3.11739	5.731
AQP1	1486.17	-3.2506	0.293789	-11.0402	2.44e-28	1.71e-26	3068.05	-4.11909	0.432985	-9.52832	1.6e-21	1.85e-19	320.943	210.808	466.522	159.855	108.415	118.725	4502.33	2952.23	6047.56	907.499	548.933	1490.27	1365.26	2027.52	4433.82	6049.4	197.182	171.456	169.474
BARX2	377.152	-2.3278	0.210833	-11.0378	2.51e-28	1.75e-26	306.102	1.31141	0.185679	7.05724	1.7e-12	7.08e-11	83.8131	84.3233	33.7385	178.974	200.021	157.169	288.182	321.894	439.376	1089.46	855.562	793.311	73.766	73.5151	70.6182	80.9499	170.891	191.719	194.035
MAOB	1200.85	-2.79828	0.254182	-11.0307	2.72e-28	1.89e-26	614.828	-1.31658	0.443669	-3.01817	0.0025431	0.0138262	144.118	141.944	230.352	499.745	437.86	450.023	1414.46	1464.95	2669	1998.1	2092.07	2867.62	44.4938	26.6359	92.0559	120.782	50.7039	20.263	13.0994
RP4-791M13.3	259.294	1.65993	0.150489	11.0305	2.72e-28	1.89e-26	210.004	-0.00793231	0.173832	-0.0373549	0.970202	0.996602	484.481	508.75	436.274	310.681	314.318	291.724	154.533	191.822	163.743	105.284	84.3072	65.6166	251.741	296.191	290.039	296.816	262.909	272.771	307.836
CCDC170	110.662	2.44885	0.221962	11.0216	3.01e-28	2.08e-26	79.4883	1.271	0.411757	3.09709	0.00195431	0.0111186	290.28	230.484	153.568	150.826	149.595	142.47	47.3343	48.6126	53.2163	16.0214	22.4819	23.0545	40.9811	62.8607	69.3572	47.542	157.746	118.461	135.906
PPA1	6751.29	2.70619	0.245969	11.0105	3.4e-28	2.34e-26	3518.86	1.61999	0.252161	6.42311	1.34e-10	4.2e-09	15461.5	14436.1	15332.4	5919.4	11041.5	8655.6	1339.28	1235.02	1603.31	2143.44	1994.64	1853.23	1387.5	1629.05	1295.09	1567.6	6446.91	3759.57	3522.93
LMO3	88.245	4.43072	0.397396	11.0016	3.76e-28	2.58e-26	488.368	0.681128	0.393103	1.77754	0.0754799	0.196091	196.245	216.43	346.692	63.1984	99.1699	87.0648	20.8828	13.1385	10.9162	4.57755	0.624498	0	949.591	1030.28	730.142	583.353	1641.31	1179.93	1244.45
MID1	849.221	3.02675	0.27553	10.9996	3.84e-28	2.63e-26	674.167	0.709794	0.258854	2.7416	0.00611399	0.0283111	1620.05	1242.36	2685.12	919.297	1408.55	1171.42	327.164	158.976	349.317	72.0964	96.7971	139.509	584.273	493.297	479.195	391.9	970.887	646.858	788.422
SCN9A	262.832	4.85945	0.44649	10.9909	4.23e-28	2.89e-26	108.55	0.716705	0.457714	1.53885	0.123842	0.279413	383.292	507.345	1031.93	245.889	414.328	457.938	13.9219	60.4372	28.6549	2.28877	4.99598	2.9557	11.7089	7.45805	20.1766	21.8436	35.6806	17.1456	23.7427
SPON2	4367.03	3.69609	0.336691	10.9892	4.31e-28	2.93e-26	2444.27	0.145135	0.300461	0.457248	0.647493	0.807613	4963.37	3526.12	11361.7	9370.35	9168.17	10633.2	875.685	282.478	813.255	597.37	317.245	495.376	276.33	232.265	341.742	409.889	567.133	230.687	248.07
SERPINI1	309.225	2.01981	0.183804	10.9878	4.37e-28	2.97e-26	659.132	1.58486	0.244239	6.50366	7.84e-11	2.56e-09	394.535	579.02	522.365	396.716	590.817	491.86	118.336	158.976	154.191	117.872	84.9317	101.085	768.103	826.778	413.621	552.515	2238.49	1524.4	2083.63
ACTC1	1593.69	5.01446	0.461801	10.9873	4.4e-28	2.98e-26	1428.99	0.663102	0.595442	1.00996	0.312514	0.519927	2952.88	2404.62	3831.06	3606.03	2790.2	3040.48	34.8047	111.677	245.614	76.674	13.739	16.5519	2.34178	7.45805	26.4818	23.1286	33.8026	7.79347	27.8363
FAM69C	60.0497	6.11298	0.483959	10.9872	4.41e-28	2.98e-26	323.423	3.30739	0.563039	5.89321	3.79e-09	9.19e-08	98.1227	96.9718	130.3	91.8766	168.084	128.901	0	3.94156	0	0	0.624498	1.77342	223.64	205.629	25.2208	37.2627	1425.34	1535.31	1283.74
MB21D2	284.118	2.11786	0.19286	10.9771	4.92e-28	3.31e-26	284.797	0.844832	0.212755	3.97425	7.06e-05	0.00066008	527.409	490.481	757.371	292.624	398.36	314.338	123.904	115.619	167.836	52.6418	73.0662	95.7648	282.184	261.032	286.256	231.286	540.842	462.932	435.556
OSBPL1A	2606.84	2.42841	0.221394	10.9771	4.92e-28	3.31e-26	2190.56	1.14333	0.204085	5.60358	2.1e-08	4.38e-07	4548.4	4795.18	5336.5	3254.45	4451.72	4023.07	494.226	617.511	721.832	736.986	1222.77	1079.42	1576.02	1557.67	1298.87	1335.03	4195.28	2682.51	2741.87
COL4A6	1016.37	2.95031	0.270432	10.9537	6.38e-28	4.27e-26	412.856	-2.59731	0.230423	-11.25	2.32e-29	6.38e-27	2075.91	2044.84	2293.05	1234.76	1458.13	1511.76	391.204	614.883	259.259	112.15	100.544	99.9027	216.614	183.255	262.296	238.995	46.9481	43.6434	24.5614
CHST1	1629.15	-3.24359	0.296362	-10.9487	6.74e-28	4.5e-26	763.42	1.68836	0.176086	9.58127	9.59e-22	1.12e-19	344.452	326.05	86.0913	366.444	281.542	336.952	4055.44	3774.7	2477.97	2983.42	2165.76	2350.97	120.602	103.347	113.494	146.481	439.434	366.293	371.696
GDF5	216.777	-2.5394	0.232032	-10.9472	6.85e-28	4.56e-26	834.079	1.47451	0.282669	5.24119	1.6e-07	2.83e-06	37.8181	37.9455	33.7385	89.2212	89.0848	104.025	239.456	306.128	330.214	623.691	288.518	421.483	1067.85	1242.3	752.841	728.549	3750.21	2182.17	2131.11
PRMT10	925.594	1.79006	0.163917	10.9187	9.38e-28	6.23e-26	1208.78	0.728236	0.169238	4.30953	1.64e-05	0.00018329	1007.8	1086.37	1408.87	2030.85	1495.11	1640.66	343.87	441.455	390.253	337.594	449.014	475.277	1442.54	1379.74	1177.81	973.969	2122.05	2030.98	2050.06
PHLPP1	534.118	1.65862	0.151947	10.9149	9.78e-28	6.48e-26	718.109	0.167629	0.1745	0.963696	0.335198	0.543246	733.876	670.37	914.429	781.217	889.167	889.87	235.279	216.786	238.791	197.979	314.747	326.901	884.021	842.76	867.596	821.064	788.728	992.887	1092.16
MFAP2	4428.83	-2.88217	0.264216	-10.911	1.02e-27	6.75e-26	4993.96	-0.374284	0.24427	-1.5312	0.125719	0.282442	1105.92	1045.61	558.43	1189.09	1009.35	1002.94	9017.19	10943.1	9705.84	9037.23	4004.28	4526.95	5196.4	6761.26	5742.78	6515.83	5273.21	4311.35	4393.22
MFAP5	3066.73	-3.64937	0.334038	-10.9102	1.03e-27	6.78e-26	1015.44	-2.2733	0.368065	-6.21935	4.99e-10	1.44e-08	349.562	306.375	517.711	191.719	300.031	357.305	6539.1	6485.18	14922.4	2402.07	1425.1	3004.18	154.557	164.077	283.734	375.197	39.4364	49.8782	52.3977
PCSK9	580.339	2.6881	0.246266	10.9083	1.05e-27	6.92e-26	866.021	1.29959	0.268573	4.86623	1.14e-06	1.66e-05	1745.77	1772.19	684.077	609.678	524.424	747.4	236.672	136.641	197.856	116.728	109.287	83.3508	1347.69	1402.11	688.528	679.722	2360.55	3056.6	2316.96
FLVCR2	1083.59	3.31743	0.304526	10.9001	1.15e-27	7.54e-26	560.553	1.32848	0.341401	3.89963	9.63e-05	0.00086697	2168.92	2136.19	2882.9	1053.13	1822.88	1847.58	89.0999	271.968	94.1519	173.947	244.179	218.131	468.356	266.359	172.762	179.889	914.549	629.712	551.813
EHBP1L1	2383.14	-2.11932	0.194685	-10.8867	1.33e-27	8.72e-26	2096	-0.777332	0.254486	-3.05802	0.00222803	0.0123757	758.407	871.341	656.155	1285.21	825.295	904.569	4624.84	3455.43	3049.7	5424.4	3815.06	2927.33	1581.87	1601.35	2263.57	2753.58	1089.2	1184.61	1287.84
STK39	9339.51	1.87746	0.172544	10.8843	1.37e-27	8.92e-26	5413.7	2.1051	0.24524	8.58219	9.31e-18	7.3e-16	16566.4	17155.6	11395.5	11802.2	16438.7	14513.8	4209.97	4762.72	5846.97	2902.17	3090.64	3389.6	1400.38	1462.84	1185.38	1081.9	8651.6	3904.53	4263.04
THNSL2	576.085	1.62221	0.149055	10.8822	1.4e-27	9.11e-26	743.551	-0.223902	0.166164	-1.34275	0.179351	0.360502	892.303	652.1	721.306	810.957	1121.12	1033.47	264.515	233.866	260.623	353.616	241.056	328.083	953.103	1226.32	958.39	1103.75	978.398	914.953	834.269
BASP1	1760.25	-2.3492	0.21659	-10.8535	1.92e-27	1.24e-25	1837.67	-0.892808	0.193757	-4.61167	3.99e-06	5.17e-05	451.773	453.94	410.679	889.557	644.604	577.794	3668.41	3003.47	3433.14	2915.9	2073.96	2599.84	1824.24	2139.39	1876.43	1965.93	967.131	1105.11	1065.15
ROR2	3193.79	1.98068	0.182572	10.8521	1.95e-27	1.26e-25	2662.75	0.359076	0.158093	2.2776	0.0227502	0.0790959	5713.6	4996.15	5810	3635.23	5086.24	5349.4	1181.97	1030.06	915.594	1316.05	1543.76	1747.41	3048.99	2927.82	2617.92	2754.87	3254.44	4026.1	3655.56
EPHB4	2220.41	-1.4534	0.13395	-10.8511	1.97e-27	1.27e-25	3499.01	-0.275732	0.137666	-2.0012	0.0453713	0.134951	1220.4	1023.12	865.567	1334.07	1404.35	1276.57	3467.93	3572.37	3205.26	2947.94	3073.15	3254.23	4479.82	4905.27	4819.69	4776.05	3077.92	4888.06	3784.91
SCNN1G	83.1254	4.87109	0.438457	10.845	2.11e-27	1.36e-25	22.8319	-0.194979	1.10887	-0.33728	0.735906	0.867814	134.919	105.404	375.777	77.0064	115.138	159.43	9.7453	5.25541	9.55165	2.28877	0.624498	2.36456	0	1.06544	0	0	0	0	0
AF131216.5	78.5984	5.05292	0.447951	10.8313	2.45e-27	1.57e-25	27.7706	4.57771	0.923418	4.72056	2.35e-06	3.2e-05	214.643	153.187	336.221	39.2998	94.9678	85.9341	6.96093	3.94156	1.36452	2.28877	4.37148	0	0	6.39261	0	0	138.966	51.4369	35.2047
LAMC3	5460.66	-2.8157	0.260035	-10.8276	2.55e-27	1.63e-25	3102.14	0.548418	0.341494	1.58063	0.113962	0.263859	956.696	834.801	706.181	2093.51	1360.64	1867.94	6012.85	7427.21	4939.57	22993	9005.88	7329.55	266.963	313.238	249.686	265.978	349.294	448.904	406.082
SERPINA5	2161.89	-2.56645	0.237188	-10.824	2.65e-27	1.69e-25	1228.77	-0.440085	0.20635	-2.13117	0.0330753	0.106078	378.181	372.428	172.183	744.572	1092.55	971.282	1158.3	2697.34	2188.69	5575.46	5371.3	5220.36	152.215	226.938	157.63	122.067	110.797	134.048	119.532
TRIM53BP	94.8025	7.68097	0.61529	10.8202	2.76e-27	1.76e-25	14.0765	5.58571	0.960203	5.49863	3.83e-08	7.62e-07	311.744	271.24	403.699	35.5823	58.8296	56.5356	0	0	0	0	0	0	0	0	0	0	43.1923	26.4978	10.6433
TNFRSF25	689.861	-3.04567	0.281625	-10.817	2.86e-27	1.82e-25	506.956	-1.58436	0.331004	-4.79019	1.67e-06	2.34e-05	126.742	141.944	87.2547	238.985	128.585	119.856	1652.53	1504.36	1131.19	1612.44	849.317	685.132	502.311	660.57	609.082	779.946	232.863	154.311	235.79
LPCAT3	4117.43	1.94151	0.17962	10.812	3.02e-27	1.91e-25	1949.92	-0.121569	0.13856	-0.878369	0.379743	0.58795	7676.06	7653.74	7519.03	4660.75	5990.53	5827.69	1362.95	1354.58	1483.23	1881.37	2115.8	1883.37	1456.59	1156	1259.78	1347.88	1363.37	997.563	1237.08
PAPPA	7330.94	3.35791	0.310656	10.8111	3.05e-27	1.92e-25	3630.56	0.875621	0.381278	2.29226	0.0218904	0.0768954	13373.3	12307	9758.57	11904.1	16606.8	16794.5	1656.7	1106.26	1110.72	321.573	1315.19	1716.67	517.533	406.997	482.978	397.04	886.38	774.67	859.65
ARHGDIB	866.142	-1.48899	0.137885	-10.7962	3.59e-27	2.26e-25	641.514	1.39306	0.261037	5.32269	1.02e-07	1.88e-06	336.275	320.429	250.13	708.459	580.732	459.069	744.819	785.684	802.338	1909.98	1766.7	1729.09	155.728	174.731	69.3572	129.777	328.637	366.293	360.234
PDLIM7	4713.57	-2.04838	0.189937	-10.7823	4.17e-27	2.62e-25	3787.64	0.144484	0.252097	0.559378	0.575904	0.756593	1427.89	1226.9	1343.72	2980.41	1706.9	1990.05	5545.08	4577.46	5509.94	13954.7	8859.12	7440.69	1114.69	1292.37	1329.14	1532.91	1446	1407.5	1508.07
MMP2	17942.8	-3.02579	0.281122	-10.7793	4.31e-27	2.7e-25	24784.8	0.470647	0.166526	2.83122	0.00463704	0.0226218	3332.08	2993.48	2196.49	4816.88	3903.76	3792.41	41173.9	47169.9	46613.4	21711.3	16282.5	21327.8	31240.5	34625.6	28038	28630.6	38873	46354	42398.7
ART3	438.699	3.39684	0.31583	10.7694	4.8e-27	3e-25	269.596	0.307972	0.402245	0.777119	0.437088	0.641206	884.126	729.396	280.378	1032.95	1021.95	886.478	86.3155	91.9697	98.2455	62.9413	51.2088	38.4241	159.241	201.367	121.06	114.358	146.478	199.513	212.047
STRBP	839.195	-1.50804	0.140079	-10.7646	5.06e-27	3.15e-25	733.819	-2.50264	0.194616	-12.8581	7.75e-38	3.88e-35	493.68	514.372	383.921	450.355	347.095	398.011	1655.31	1479.4	1169.39	1181.01	1002.32	995.481	706.046	800.142	1088.28	1135.87	144.6	151.193	186.667
ID4	3440.39	2.37238	0.220625	10.7605	5.29e-27	3.29e-25	6805.17	0.55682	0.159652	3.49542	0.000473312	0.00338018	3704.13	3409.47	2901.51	6603.96	9268.18	8564.01	270.084	660.868	731.383	1611.3	1624.94	1934.8	8412.84	9323.63	7370.78	7393.43	10685.4	13666.6	11598.7
ITGB4	363.115	-3.91404	0.363784	-10.7502	5.91e-27	3.67e-25	315.358	-0.125838	0.238528	-0.53868	0.590108	0.76707	33.7297	12.6485	75.6208	35.5823	22.6914	40.7056	459.421	454.593	319.298	724.397	1046.66	1132.03	92.5002	86.3003	98.3611	104.079	105.164	81.052	77.7778
ANO5	278.079	3.09043	0.287431	10.7429	6.4e-27	3.96e-25	181.86	-1.49867	0.38584	-3.92338	8.73e-05	0.00079446	252.462	310.591	594.495	645.792	597.541	610.584	72.3937	52.5541	57.3099	25.1765	63.0742	54.9761	33.9558	24.505	32.787	25.6984	9.38962	10.9108	9.00585
TGFBI	13675.5	-2.75728	0.257276	-10.7377	6.77e-27	4.18e-25	12794.5	-2.32901	0.295806	-7.89262	2.96e-15	1.73e-13	1360.43	1398.36	2845.67	4795.11	6064.49	5805.07	24586	12827.1	15439.6	31793.4	21843.7	35347.2	6136.63	8067.48	10078.2	12378.9	2745.53	1275.01	1297.66
PCP4L1	133.046	6.34762	0.548791	10.734	7.05e-27	4.34e-25	39.0631	1.71822	0.521788	3.29275	0.000992128	0.00627797	220.776	202.376	671.28	124.803	210.106	159.43	0	0	0	2.28877	3.12249	2.36456	10.538	5.32718	6.3052	7.70952	48.826	15.5869	16.3743
ATP8A1	1250.09	3.77298	0.353524	10.7267	7.63e-27	4.67e-25	857.126	0.628354	0.504119	1.21627	0.223882	0.417997	1924.64	2963.96	1713.68	2256.55	2414.53	2718.23	144.787	394.156	204.678	37.7648	120.528	107.588	106.551	357.986	110.972	125.922	555.865	112.226	157.193
ZDHHC23	293.654	3.78788	0.354444	10.7266	7.64e-27	4.67e-25	217.888	1.61855	0.27252	5.94057	2.84e-09	7.05e-08	570.338	459.562	1012.15	358.478	465.594	438.716	16.7062	21.0217	20.4678	53.7862	66.8212	40.1976	163.924	126.787	102.144	92.5142	384.974	335.119	415.088
SH3BGRL2	500.252	2.51843	0.234904	10.7123	8.91e-27	5.44e-25	335.651	0.238492	0.216393	1.10441	0.269415	0.471766	887.193	937.394	1837	351.574	616.03	541.611	164.278	216.786	162.378	75.5296	96.7971	116.455	379.368	355.856	313.999	339.219	448.824	388.115	395.439
C19orf57	67.802	-2.06364	0.192436	-10.7059	9.55e-27	5.82e-25	80.7246	-0.891536	0.265446	-3.36188	0.000774141	0.00512206	20.4422	18.27	17.4509	35.5823	32.7765	28.2678	68.2171	84.0866	70.9551	161.359	146.757	129.46	67.9116	114.002	78.1845	79.665	61.9715	34.2912	42.5731
MAMLD1	483.603	-2.22581	0.208059	-10.6998	1.02e-26	6.2e-25	297.803	-2.55066	0.502623	-5.09656	3.46e-07	5.62e-06	262.683	244.538	167.529	157.73	84.8827	111.94	1010.73	1111.52	687.719	568.761	776.875	618.333	186.171	138.507	325.348	282.682	0	49.8782	54.8538
RAPGEF3	572.153	-2.92672	0.273534	-10.6993	1.03e-26	6.22e-25	567.201	-1.59008	0.287754	-5.52988	3.2e-08	6.45e-07	114.476	158.809	53.5162	178.442	114.297	145.862	964.785	1533.27	713.644	1174.14	946.114	768.483	619.4	610.495	752.841	743.968	351.172	163.663	158.012
TGM3	64.4054	6.73895	0.562652	10.6688	1.42e-26	8.61e-25	41.5984	-0.449531	0.646874	-0.676579	0.498673	0.694484	28.6191	37.9455	75.6208	150.826	237.84	238.58	0	0	0	3.43316	0	0	5.85444	4.26174	27.7429	7.70952	5.63377	6.23477	11.462
DTNA	296.852	3.02966	0.283876	10.6628	1.52e-26	9.16e-25	176.6	-0.270956	0.452027	-0.638176	0.523359	0.71509	578.515	550.912	246.64	449.824	678.221	691.996	30.6281	97.2251	64.1325	54.9306	62.4498	56.7495	43.3229	46.8792	35.3091	33.4079	75.117	7.79347	18.0117
C15orf52	565.785	1.87622	0.175967	10.6599	1.57e-26	9.43e-25	355.883	0.289	0.49841	0.520427	0.602766	0.776293	661.306	615.56	770.168	1244.32	925.305	1162.37	207.436	245.69	268.811	217.434	252.297	218.722	1.17089	5.32718	25.2208	3.85476	11.2675	15.5869	6.54971
TMSB4X	9523.73	-1.89972	0.178278	-10.6543	1.67e-26	9.99e-25	9359.95	-0.0743386	0.27455	-0.289356	0.772309	0.888453	3305.51	3368.72	2743.29	5631.56	4250.86	4241.3	10587.6	8889.53	13489.6	26165.3	14701.9	16909.6	2380.42	3330.55	3680.98	5128.11	4668.52	2939.7	2694.39
PRCP	3393.34	1.29665	0.121734	10.6514	1.72e-26	1.03e-24	3821.89	1.04111	0.207237	5.02464	5.04e-07	7.98e-06	4723.18	4892.16	4817.62	3700.56	5715.71	5130.04	1801.49	2103.48	1874.85	1872.22	1911.59	2177.17	3075.93	3003.46	2484.25	3050.4	8270.38	5121.86	4641.29
SATB2	955.334	2.34808	0.22047	10.6486	1.77e-26	1.06e-24	372.028	1.33891	0.326113	4.08985	4.32e-05	0.000425584	1882.73	1714.57	2354.71	994.179	1380.81	1344.42	286.79	292.989	287.914	181.958	351.592	391.335	12.8798	24.505	23.9598	32.123	54.4598	57.6716	66.3158
LRRFIP2	4643.26	1.95025	0.183172	10.6465	1.81e-26	1.08e-24	2245.25	0.24446	0.153995	1.58396	0.113202	0.262642	8920.99	8832.86	10093.6	4301.21	6646.9	5881.96	1777.82	1591.08	1866.66	2029	1874.12	1902.88	1062	1077.16	1141.24	1129.44	1184.97	1357.62	1372.98
LAMB3	7299.71	-4.37491	0.404559	-10.643	1.88e-26	1.11e-24	5857.68	-1.06814	0.377615	-2.8471	0.00441187	0.0217253	53.1498	71.6748	124.483	352.105	534.509	494.121	1020.47	731.816	532.163	34578.8	27018.3	22085	138.165	170.47	168.979	308.381	174.647	42.0847	61.4036
FAXDC2	2301.56	2.05542	0.193273	10.6432	1.88e-26	1.11e-24	1341.54	-0.584825	0.246679	-2.3732	0.0176349	0.0651222	4728.29	4079.84	3665.86	2698.94	3469.26	3426.06	1077.55	1349.33	1364.52	781.617	524.578	452.814	865.287	927.995	914.254	890.449	707.977	578.275	507.603
HEYL	513.341	-2.39446	0.225634	-10.6272	2.23e-26	1.32e-24	318.883	1.45396	0.322627	4.48601	7.26e-06	8.85e-05	296.412	231.889	354.836	51.5146	60.5104	58.797	828.351	1961.58	1181.67	339.883	379.07	415.572	14.0507	24.505	8.82728	44.9722	50.7039	67.0238	72.8655
ACSL1	8341.03	2.3117	0.217772	10.6173	2.48e-26	1.46e-24	3511.56	2.83255	0.229476	12.3322	6.08e-35	2.48e-32	16321.1	17773.9	14718.1	9831.33	12676.9	12474	3328.72	1566.11	2387.91	2331.12	3280.49	3402.61	270.475	256.77	191.678	291.677	2563.37	1555.58	1380.35
NRXN3	372.353	4.58004	0.441203	10.6065	2.78e-26	1.63e-24	200.851	-1.15919	0.265688	-4.33872	1.43e-05	0.000162949	684.815	750.477	1234.36	331.393	637.04	618.499	43.1578	36.7879	114.62	8.01071	3.74699	5.32026	320.824	230.134	308.955	256.984	122.065	130.93	120.351
GABBR2	52.2416	-4.00245	0.368853	-10.5991	3.01e-26	1.77e-24	9.46511	0.22802	0.717183	0.296668	0.76672	0.885397	5.11056	11.2431	8.14377	1.59324	3.36169	1.13071	187.945	126.13	192.397	21.7434	24.3554	43.7444	3.51267	2.13087	5.04416	3.85476	7.5117	1.55869	4.09357
SLC37A1	884.346	1.88033	0.177703	10.5862	3.45e-26	2.02e-24	426.39	-0.266711	0.504563	-0.58329	0.559698	0.744127	1408.47	1134.15	1323.94	1163.59	1706.9	1563.77	322.987	248.318	237.427	450.889	554.554	497.149	52.69	63.9261	66.8351	136.202	153.99	20.263	22.924
OSBPL9	5097.14	1.30035	0.122877	10.5825	3.59e-26	2.1e-24	3646.73	0.892285	0.170732	5.22766	1.72e-07	3.01e-06	7364.31	8197.63	7386.4	6767.54	6997.36	6870.21	2588.07	2794.57	3313.06	2304.8	3331.07	3250.68	2593.52	2753.09	2148.81	1995.48	5350.21	3870.24	4043.63
FOXO4	2019.88	2.52185	0.238442	10.5796	3.7e-26	2.15e-24	2696.15	1.30973	0.241848	5.43125	5.6e-08	1.08e-06	4734.42	4511.3	2397.76	2303.29	3864.26	2862.96	593.071	718.678	929.239	275.797	526.451	521.386	3087.63	2935.28	2404.8	2276.88	8084.46	6443.64	5620.47
HTR7	61.4385	4.79683	0.436696	10.58	3.69e-26	2.15e-24	64.8726	-3.26197	0.581812	-5.45202	4.98e-08	9.72e-07	55.194	68.864	52.3528	311.212	123.542	107.418	2.78437	2.62771	0	1.14439	5.62048	6.50255	60.8862	51.1409	69.3572	43.6873	7.5117	6.23477	2.45614
ARSI	1297.34	1.74764	0.165432	10.5717	4.03e-26	2.34e-24	1738.52	1.05336	0.275962	3.82131	0.000132742	0.00114627	1508.64	1179.12	1375.13	1923.57	2932.24	2908.19	303.497	302.186	373.879	980.74	881.166	899.716	1297.35	1601.35	1292.57	1246.37	4721.1	1906.28	1935.44
APOL3	106.895	-2.48119	0.234791	-10.5501	5.08e-26	2.94e-24	91.5708	-4.03901	0.722185	-4.91845	8.72e-07	1.31e-05	30.6633	26.7024	12.7974	41.4241	47.9041	28.2678	160.101	86.7143	148.733	220.867	238.558	240.003	12.8798	14.9161	35.3091	95.084	0	0	2.45614
MC3R	81.5541	7.56983	0.653794	10.5483	5.17e-26	2.98e-24	16.8856	0	0.998088	0	1	1	216.688	143.35	347.855	42.4863	108.415	119.855	0	0	0	0	0	0	0	0	0	0	0	0	0
CACNA1B	169.096	2.63992	0.250224	10.5373	5.81e-26	3.35e-24	68.7146	-1.20567	0.617803	-2.01014	0.0444162	0.132809	319.921	285.294	567.737	184.284	201.702	200.136	38.9812	73.5758	66.8615	27.4653	43.0903	20.0988	5.85444	30.8976	5.04416	6.4246	7.5117	3.11739	4.09357
MMP3	4391.6	-5.14538	0.478914	-10.5319	6.15e-26	3.53e-24	3432.09	1.28029	0.758814	1.63626	0.101785	0.243536	7.15478	8.43233	45.3725	139.143	211.786	157.169	836.704	199.706	203.314	20260.2	13815.8	16814.4	1.17089	0	20.1766	0	18.7792	10.9108	13.0994
PLA2G2A	939.694	-3.16379	0.300476	-10.5274	6.46e-26	3.7e-24	883.999	-2.83509	0.313141	-9.02581	1.78e-19	1.71e-17	176.825	141.944	181.49	138.612	163.042	161.692	1000.98	532.11	1333.14	3116.17	1664.29	2666.04	665.065	1105.92	1358.14	1738.5	221.595	105.991	170.292
SDC1	2189.57	-1.72522	0.164117	-10.5093	7.83e-26	4.47e-24	2984.69	-0.846991	0.22801	-3.71642	0.000202062	0.00164682	839.153	695.667	799.253	1476.93	880.763	1207.6	2156.5	2843.18	1876.22	4407.04	4740.56	4351.98	2757.44	3308.18	3617.92	4519.06	1682.62	2193.08	2010.76
RIN3	804.686	-1.23613	0.117681	-10.5037	8.31e-26	4.74e-24	1222.06	0.320186	0.185857	1.72979	0.0836679	0.211288	464.039	394.914	531.672	577.814	432.818	462.461	1117.93	1045.83	1035.67	1301.17	1119.1	1172.82	1834.78	1655.69	1610.35	1484.08	1483.56	2303.75	2385.73
MGST1	11548	4.61187	0.458501	10.484	1.02e-25	5.82e-24	4003.7	0.0969948	0.230338	0.406816	0.684143	0.832993	27755.4	29711.3	28260.1	11445.8	19667.6	16537.8	161.494	199.706	296.101	1614.73	1525.65	1400.41	270.475	339.874	272.385	344.358	430.045	244.715	311.111
ACPL2	1809.09	-1.65463	0.157843	-10.4831	1.03e-25	5.86e-24	5214.06	0.630154	0.202063	3.13635	0.00171066	0.00997966	674.593	760.315	785.292	1151.91	1034.56	812.982	2471.13	2450.34	2555.75	2070.2	3257.38	3684.58	8762.93	8917.7	7358.17	7741.64	9994.31	14584.7	13684.8
CITED2	2937.53	2.00289	0.190883	10.4784	1.09e-25	6.15e-24	5965.27	0.993731	0.204081	4.87079	1.11e-06	1.63e-05	1384.96	1267.66	1646.21	7076.62	8123.53	9493.46	364.753	378.39	556.725	1343.51	1466.32	2148.2	4359.22	5317.59	4269.88	4995.77	11643.1	8407.59	8394.27
FGF14	69.1143	3.44043	0.32631	10.4699	1.19e-25	6.7e-24	26.4813	0.118835	0.799485	-0.00811214	0.993528	1	163.538	179.89	118.666	89.7523	113.457	104.025	12.5297	5.25541	5.45808	6.86632	18.1104	11.8228	2.34178	6.39261	0	0	7.5117	0	0.818714
RP5-858B6.3	66.4796	2.5402	0.241994	10.4661	1.24e-25	6.97e-24	43.4682	0.740601	0.311561	2.38892	0.016898	0.0630556	127.764	115.242	125.647	80.1929	126.904	107.418	12.5297	18.3939	28.6549	25.1765	16.2369	13.5962	35.1267	36.2248	37.8312	34.6928	76.9949	51.4369	55.6726
RIPK4	1167.16	-2.02507	0.193879	-10.4657	1.24e-25	6.98e-24	1303.91	0.417333	0.319546	1.3182	0.187438	0.371272	27.597	36.5401	39.5555	1174.21	721.083	928.314	206.043	149.779	146.004	2800.32	3662.68	4113.75	819.622	936.518	421.187	477.99	1312.67	690.501	682.807
DCN	165353	2.39831	0.229583	10.4599	1.32e-25	7.4e-24	69575.1	-1.25486	0.213817	-5.89041	3.85e-09	9.3e-08	255041	252655	278325	213093	353610	309843	54431.7	66234	91534.8	32855.4	37052.1	39562.7	10301.5	11743.2	12036.6	11559.1	6437.52	3851.53	3914.27
OLFML2A	1642.53	2.71051	0.25933	10.4514	1.44e-25	8.07e-24	1204.18	-3.26551	0.482042	-6.82897	8.55e-12	3.2e-10	2224.11	2056.08	2021.98	3200.81	3559.19	4211.9	264.515	350.799	652.241	454.322	248.55	465.819	337.216	262.097	480.456	431.733	50.7039	0	50.7603
MAN1C1	575.041	-1.6975	0.162391	-10.4512	1.45e-25	8.08e-24	344.759	0.520372	0.250647	2.06086	0.0393167	0.120957	205.444	212.214	225.699	360.071	289.946	301.9	682.171	656.926	633.138	1462.53	1097.24	773.212	83.1331	54.3372	68.0962	62.9611	95.7741	96.639	96.6082
RP11-524D16__A.3	528.439	-3.09153	0.29571	-10.446	1.53e-25	8.51e-24	212.474	-3.42678	0.321492	-10.5945	3.16e-26	6.11e-24	73.592	73.0802	129.137	92.9388	110.936	72.3656	1369.91	1625.24	1318.13	329.584	522.704	623.653	234.178	245.05	359.396	305.811	18.7792	20.263	33.5673
NEO1	1974.04	1.37048	0.13134	10.435	1.72e-25	9.53e-24	2234.86	-0.218649	0.120934	-1.80368	0.0712809	0.188109	2684.06	1888.84	3000.4	3226.83	2975.94	3302.81	819.997	1028.75	923.781	1242.8	1234.01	1360.21	2974.06	3698.13	3141.25	2639.22	2878.86	2584.31	2569.12
AC013271.3	312.441	3.19011	0.305818	10.4249	1.91e-25	1.06e-23	97.4983	0.0574511	0.417573	0.0967725	0.922907	0.972397	971.006	737.829	742.247	291.031	361.382	331.299	26.4515	44.671	70.9551	74.3852	42.4658	55.5672	12.8798	22.3742	7.56624	25.6984	20.6572	26.4978	9.00585
F10	111.668	2.5695	0.246075	10.424	1.93e-25	1.07e-23	76.4875	-0.530844	0.380278	-1.40638	0.159611	0.332871	187.046	188.322	95.3985	294.749	207.584	178.652	18.0984	28.9048	28.6549	45.7755	33.7229	33.1039	36.2976	36.2248	46.6585	48.8269	11.2675	29.6152	40.9357
ZNF853	823.813	-1.8568	0.178258	-10.4199	2.01e-25	1.11e-23	867.098	-0.247058	0.161197	-1.53415	0.124993	0.281528	301.523	269.834	251.294	434.954	449.626	447.762	1232.08	1464.95	1248.54	1597.57	1180.92	1006.71	757.565	925.864	871.379	967.544	739.902	766.877	718.012
RAB3D	277.191	-1.9115	0.183796	-10.4109	2.21e-25	1.21e-23	202.893	-0.90585	0.174712	-5.18464	2.16e-07	3.67e-06	168.648	185.511	233.843	55.2322	54.6275	55.4049	652.935	585.978	493.957	257.487	272.905	309.758	234.178	241.854	293.822	241.565	169.013	124.695	116.257
ABTB2	1799.66	-1.10454	0.106119	-10.4113	2.2e-25	1.21e-23	2596.24	-1.74072	0.124219	-14.0094	1.37e-44	1.08e-41	679.704	536.858	659.646	1753.09	1655.63	1765.04	1573.17	1449.18	1540.54	3190.55	3226.78	3565.76	4109.82	4421.56	5051.73	5198.78	1233.8	1441.79	1518.71
GDPD5	437.072	-1.9374	0.186196	-10.404	2.38e-25	1.3e-23	345.027	0.801497	0.24102	3.31336	0.000921839	0.00592503	173.759	155.998	157.059	178.442	228.595	179.783	625.091	905.245	529.434	926.954	617.004	567.495	103.038	95.8892	136.192	156.76	249.764	188.602	207.135
SRPX2	6233.82	-2.53791	0.244174	-10.3956	2.6e-25	1.42e-23	3396.26	-3.20457	0.158326	-20.2377	4.56e-91	3.35e-87	1104.9	1080.74	2622.3	1780.18	2027.1	1806.88	12060.5	14276.3	13330	8307.11	7818.71	8591.05	3314.79	3863.27	4644.41	4799.17	510.795	352.265	474.854
ADK	2926.23	1.44896	0.139406	10.3946	2.62e-25	1.43e-23	1840.95	1.78066	0.202401	8.7945	1.44e-18	1.24e-16	4279.58	4566.11	3281.94	3868.38	4966.06	4720.72	1470.15	1161.45	1382.26	2099.95	1695.51	1622.68	655.698	661.636	453.974	506.258	2542.71	1694.3	1691.46
ID2	2852.39	1.55481	0.149842	10.3718	3.33e-25	1.81e-23	6915.68	-0.770798	0.158841	-4.85384	1.21e-06	1.76e-05	2209.8	1964.73	2561.8	5511	6922.56	6777.49	1085.9	743.641	783.235	1844.75	1709.87	2113.92	6805.2	8293.35	7889.07	9712.71	5564.29	4507.74	4272.05
DKK1	190.203	2.99534	0.288703	10.3703	3.39e-25	1.84e-23	83.4469	-0.902723	0.663463	-1.47358	0.140594	0.305163	278.014	282.483	524.692	192.25	374.829	378.788	59.864	48.6126	57.3099	29.7541	16.2369	39.6064	15.2216	15.9815	1.26104	2.56984	0	3.11739	7.36843
C2orf82	18178.4	3.39811	0.328303	10.3527	4.07e-25	2.2e-23	16587.9	1.4717	0.383645	3.88446	0.000102559	0.000914651	51379.5	36965.9	55989.6	29115.3	8972.35	19889.2	2294.32	3285.95	2198.24	3237.47	1466.32	3347.04	14623.2	21202.2	11480.5	13680.5	59470.1	38864.4	33794.9
FRMD4A	872.583	-1.23412	0.119386	-10.3369	4.8e-25	2.59e-23	1112.74	0.0859509	0.1602	0.534228	0.593184	0.76921	549.896	477.832	443.254	574.627	486.605	582.317	1225.12	1300.71	949.707	1174.14	1371.4	1335.39	876.996	938.649	1068.1	1101.18	946.474	983.535	1233.8
TAGLN2	5349.08	-1.71637	0.166177	-10.3298	5.17e-25	2.79e-23	6297.74	-0.708471	0.236899	-3.00062	0.00269427	0.0144779	789.07	612.749	765.515	4114.8	4380.28	4294.44	3163.05	1633.12	2516.18	16644	12558	12717.8	2682.51	3675.75	4567.49	5911.91	3372.75	2129.18	2179.42
CD36	119.169	3.67757	0.355982	10.324	5.49e-25	2.95e-23	224.282	-0.401058	0.537485	-0.801343	0.422933	0.628216	113.454	188.322	337.385	178.442	245.403	263.456	27.8437	22.3355	27.2904	11.4439	8.74297	5.91141	9.36711	22.3742	31.526	93.7991	20.6572	42.0847	22.924
CERS1	437.598	-1.60711	0.155739	-10.3183	5.82e-25	3.13e-23	417.63	-0.94802	0.210369	-4.50975	6.49e-06	8.01e-05	194.201	195.349	165.202	241.641	260.531	231.796	686.348	538.68	502.144	957.852	575.162	702.275	323.165	392.08	455.236	525.532	217.839	197.954	237.427
FHL2	2640.61	-1.3388	0.129847	-10.3073	6.53e-25	3.5e-23	2230.23	-1.20697	0.217565	-5.56225	2.66e-08	5.43e-07	589.758	576.209	592.169	2089.26	2416.22	2407.29	1709.6	1278.38	1159.84	7205.06	6137.56	5525.98	519.875	709.58	834.808	900.729	433.8	235.363	289.006
MARCHF3	326.789	-2.10103	0.203984	-10.3048	6.7e-25	3.58e-23	334.615	0.128702	0.343987	0.358316	0.720107	0.857567	59.2825	68.864	86.0913	246.421	123.542	176.391	417.656	420.433	307.017	655.734	705.058	654.984	138.165	163.012	182.851	200.447	323.003	95.0803	145.731
BCL2A1	97.709	-3.13078	0.306534	-10.3003	7.02e-25	3.75e-23	81.843	0.203729	0.557456	0.310559	0.756135	0.879389	0	0	0	36.1134	42.8616	28.2678	0	1.31385	4.09356	433.723	301.008	325.127	1.17089	3.19631	5.04416	12.8492	0	4.67608	10.6433
IVL	112.279	6.76281	0.617919	10.2973	7.24e-25	3.86e-23	80.9408	4.31292	0.914106	4.71815	2.38e-06	3.23e-05	7.15478	7.02694	30.2483	202.341	617.711	481.683	0	0	0	0	0	1.18228	0	0	0	0	7.5117	10.9108	11.462
IRX2	673.902	-1.1723	0.113888	-10.2965	7.31e-25	3.88e-23	513.821	-0.667257	0.197928	-3.38819	0.000703556	0.00474766	185.002	178.484	239.66	657.476	626.955	665.989	523.462	528.169	487.134	1411.03	1287.09	1296.37	67.9116	92.6929	109.71	79.665	52.5819	73.2586	43.3918
TCIRG1	1882.5	-1.8307	0.177844	-10.294	7.5e-25	3.97e-23	1305.94	-0.883696	0.272301	-3.26575	0.00109173	0.00682731	845.286	586.047	607.293	1188.02	779.912	913.615	2948.65	2638.22	2026.31	4305.19	2905.16	2846.34	406.298	480.512	524.593	767.097	373.707	236.921	266.082
SOST	134.095	7.37396	0.560055	10.2915	7.69e-25	4.07e-23	22.6924	-0.197865	1.14516	-0.311745	0.755235	0.878947	382.27	479.237	376.94	49.9214	194.978	122.117	1.39219	0	0	2.28877	0	0	1.17089	0	0	0	0	0	0
ITGB2	731.587	3.46059	0.336131	10.291	7.73e-25	4.08e-23	313.038	2.42574	0.363766	6.65697	2.8e-11	9.78e-10	1177.47	691.451	3548.36	723.329	992.539	972.412	158.709	95.9113	204.678	57.2194	61.2008	95.7648	94.842	90.562	26.4818	30.8381	311.735	391.232	319.298
NUDT16P1	286.687	1.68287	0.163663	10.2808	8.6e-25	4.53e-23	210.618	0.264335	0.210731	1.26565	0.205639	0.395594	485.503	428.643	430.457	402.558	443.743	442.108	103.022	130.071	133.723	111.006	135.516	193.894	203.735	232.265	165.196	168.324	223.473	269.654	205.497
VASH1	1063	-2.72353	0.265355	-10.2785	8.81e-25	4.63e-23	1245.28	-0.241684	0.170291	-1.42331	0.154646	0.325721	245.307	189.727	155.895	417.428	319.361	278.155	2319.38	2696.03	1929.43	1503.73	1406.37	1295.19	975.35	946.107	1044.14	1227.1	848.822	780.905	1020.12
POU2F2	125.647	-4.16231	0.400777	-10.2781	8.85e-25	4.64e-23	36.1138	-1.55443	0.709966	-2.22485	0.0260911	0.0880728	19.4201	15.4593	5.81698	8.49726	4.20211	6.78427	328.556	199.706	600.389	178.524	49.9598	90.4445	11.7089	52.2064	26.4818	7.70952	5.63377	9.35216	6.54971
HMGCS2	50.3015	7.29933	0.639463	10.2716	9.46e-25	4.95e-23	16.597	0.86396	0.912702	0.941624	0.346385	0.55477	80.7468	57.6209	118.666	87.0969	126.063	133.424	0	0	0	0	0	0	0	1.06544	0	3.85476	0	4.67608	2.45614
WNT5B	1010.04	-2.26891	0.22131	-10.2569	1.1e-24	5.75e-23	855.101	1.36993	0.229123	5.97836	2.25e-09	5.68e-08	440.53	327.455	451.398	269.788	252.127	301.9	1706.82	1183.78	1282.65	2442.12	1641.8	1820.12	543.292	456.006	380.834	408.604	1590.6	1098.88	817.077
OACYLP	52.6453	5.466	0.489772	10.2495	1.19e-24	6.19e-23	15.5148	-0.752991	1.04109	-0.87551	0.381297	0.589165	89.9458	108.215	166.366	43.0174	136.989	79.1498	0	1.31385	1.36452	1.14439	1.87349	2.36456	2.34178	0	0	2.56984	0	0	0.818714
FIBCD1	352.425	-2.9379	0.286543	-10.244	1.26e-24	6.54e-23	207.869	0.665938	0.481996	1.36437	0.17245	0.350722	79.7247	87.1341	36.0653	101.967	78.1593	73.4963	616.738	599.117	266.082	1143.24	563.921	583.456	31.614	9.58892	16.3935	8.99444	28.1689	45.2021	9.82457
DLX5	865.266	4.23147	0.43171	10.2389	1.33e-24	6.88e-23	787.653	4.12507	0.557552	7.4111	1.25e-13	6.11e-12	2444.89	1973.16	2265.13	737.668	1196.76	992.765	254.77	222.041	263.353	9.1551	8.11847	15.3697	256.425	258.901	31.526	32.123	3994.34	2375.45	2694.39
HIST1H2AC	303.619	2.13412	0.208462	10.2334	1.41e-24	7.27e-23	561.863	-0.1055	0.222136	-0.46047	0.645179	0.806099	556.029	536.858	580.535	355.292	442.062	516.735	71.0015	107.736	148.733	74.3852	119.279	134.78	1021.01	1210.34	843.636	890.449	1175.58	871.309	728.655
RALGPS2	400.824	1.95616	0.191181	10.2304	1.45e-24	7.48e-23	571.896	-0.108106	0.230476	-0.467201	0.640356	0.802827	609.178	619.776	642.195	580.469	585.775	800.544	203.259	126.13	110.526	129.316	179.855	222.86	716.584	638.196	677.178	603.912	383.096	731.027	713.919
GALNT16	1192.93	-4.78009	0.481448	-10.2284	1.48e-24	7.62e-23	410.393	-2.8048	0.351764	-7.97834	1.48e-15	9.08e-14	24.5307	28.1078	16.2875	74.8821	61.3509	100.633	5099.58	3447.55	2778.16	898.344	696.315	1089.47	258.766	228.003	377.051	394.47	46.9481	32.7326	47.4854
PLCB4	1109.47	-2.56954	0.251835	-10.2021	1.94e-24	9.97e-23	1014.62	0.0714501	0.288138	0.256441	0.79761	0.902651	314.81	327.455	198.941	472.129	269.776	274.763	2187.12	1751.37	1402.73	1089.46	2874.56	2150.57	1207.19	1063.3	935.692	917.432	1164.31	860.399	1232.16
PRB4	116.529	7.3299	0.580986	10.1992	2e-24	1.03e-22	12.8709	-0.692672	1.13579	-0.718697	0.472328	0.672757	306.633	245.943	630.561	57.3565	89.9252	66.712	0	0	0	0	0.624498	0.59114	2.34178	0	0	0	0	0	0
C1QL4	155.101	-3.96181	0.388978	-10.1966	2.05e-24	1.05e-22	530.869	-5.16386	0.343077	-14.9701	1.15e-50	1.49e-47	23.5086	21.0808	58.1698	4.77971	5.04254	5.65356	246.417	706.853	294.736	248.332	124.275	122.366	1204.85	1695.11	1895.34	2324.42	65.7273	38.9673	36.8421
SERTAD4	2099.99	-4.40714	0.438249	-10.1822	2.38e-24	1.21e-22	1226.2	-1.63793	0.20758	-7.88818	3.07e-15	1.78e-13	70.5257	64.6479	98.8887	163.572	116.819	134.555	7456.55	7838.45	5619.1	847.991	1345.79	1442.97	1735.26	1787.8	2210.6	2262.74	587.79	642.181	678.714
GPR68	532.182	-3.33139	0.332008	-10.1828	2.37e-24	1.21e-22	384.13	-0.664201	0.296065	-2.27216	0.0230768	0.0799799	14.3096	19.6754	9.30717	289.438	207.584	255.541	451.068	379.703	298.83	1453.37	1542.51	1464.85	55.0318	49.01	59.2689	29.5531	43.1923	15.5869	31.9298
UCK2	889.764	-1.63736	0.160929	-10.1724	2.63e-24	1.34e-22	961.643	0.375609	0.170745	2.20055	0.0277676	0.092612	320.943	347.131	464.195	379.19	505.094	521.258	949.471	1028.75	1125.73	2035.87	1473.81	1525.73	795.034	955.696	825.981	958.55	1239.43	1137.85	1070.88
PRELP	66378.6	0.973604	0.0957672	10.1663	2.8e-24	1.42e-22	37765.8	0.803133	0.127754	6.2906	3.16e-10	9.35e-09	95771.8	81921.5	96990	75791.8	89736.1	87969.4	48176.6	44764.3	46071.7	39363.5	40929.6	49056.4	20199	20393.5	18896.7	18700.7	33301.2	32581.4	36637.4
PCDHGB2	77.8895	2.56924	0.252066	10.1653	2.83e-24	1.43e-22	85.0504	-0.838638	0.237429	-3.53282	0.000411151	0.00301438	128.786	113.836	228.026	107.809	126.063	101.764	20.8828	30.2186	21.8323	13.7326	17.4859	24.2368	106.551	78.8422	109.71	97.6539	48.826	51.4369	60.5848
ARHGEF40	7976.42	-1.68343	0.165665	-10.1622	2.92e-24	1.48e-22	10459.5	-0.272039	0.185827	-1.45975	0.14436	0.310769	3935.13	3431.96	2302.36	5176.42	3732.32	4062.65	10579.2	11592.1	10924.4	16662.3	11721.2	11597	14681.8	14215	15193	13940.1	9892.9	12801.5	13322.1
S100Z	75.0578	2.33752	0.229545	10.1584	3.04e-24	1.53e-22	20.2125	0.388096	1.06061	0.257522	0.796776	0.902577	189.091	188.322	127.974	77.0064	85.7231	93.8491	18.0984	34.1602	25.9259	21.7434	18.1104	20.6899	1.17089	0	0	0	1.87792	0	0
CX3CL1	926.456	-1.47174	0.144801	-10.1574	3.07e-24	1.55e-22	1719.78	0.211039	0.19695	1.08791	0.276633	0.480279	210.555	193.944	140.771	830.076	661.413	733.832	488.657	381.017	457.115	2509.64	2358.1	2152.34	2626.3	2892.66	2450.2	2342.41	2028.16	3611.49	3336.26
SULT1E1	262.201	2.48994	0.244956	10.1542	3.17e-24	1.59e-22	118.391	0.305575	0.503173	0.507729	0.611644	0.782787	593.847	722.37	634.051	234.206	284.903	229.535	130.865	39.4156	136.452	44.6311	51.2088	44.9267	5.85444	3.19631	3.78312	11.5643	18.7792	6.23477	1.63743
WNT11	1043.91	3.05809	0.301844	10.1516	3.26e-24	1.63e-22	1078.02	1.17287	0.35762	3.29685	0.000977769	0.00620314	1974.72	1292.96	4005.57	1009.58	1434.6	1428.09	352.223	266.712	427.095	167.081	63.6987	104.632	717.755	904.555	1147.55	1547.04	4037.54	1624.16	1811.81
GPC5	52.2536	3.33568	0.325803	10.1464	3.44e-24	1.72e-22	99.3218	0.995177	0.257677	3.87351	0.00010728	0.000950349	102.211	127.89	76.7841	77.0064	86.5635	107.418	5.56874	5.25541	9.55165	3.43316	9.99196	15.3697	88.9875	94.8238	74.4014	97.6539	236.618	160.545	144.912
CDC42EP4	1651.03	1.89367	0.187272	10.1274	4.18e-24	2.08e-22	2306.53	0.325074	0.137186	2.37483	0.0175571	0.0649111	2129.06	1960.52	2130.18	2645.83	3281.85	3137.72	375.89	419.119	361.598	1042.54	1077.26	1250.85	3084.12	3260.23	2495.6	2559.56	3179.32	3895.17	3648.19
BCL2	699.427	1.88947	0.186561	10.1261	4.23e-24	2.11e-22	835.589	-0.0844953	0.227325	-0.36248	0.716994	0.855487	1148.85	1384.31	1376.3	876.28	980.773	876.302	257.554	392.842	350.682	148.77	318.494	281.974	1265.73	1240.17	1515.77	1264.36	1609.38	983.535	1152.75
COL18A1	2613.76	-2.20843	0.218211	-10.1197	4.52e-24	2.25e-22	4359.16	-0.941587	0.288521	-3.2801	0.00103771	0.00653828	988.382	730.802	1021.46	1196.52	641.242	741.747	3469.33	2900.99	3362.18	6758.75	4586.93	4966.76	1607.63	2316.26	2718.8	3518.11	1346.47	1206.43	1362.34
FAM83H	298.622	3.1874	0.315195	10.113	4.84e-24	2.4e-22	128.164	0.215813	0.243667	0.888074	0.374501	0.582955	705.257	496.102	1093.59	274.568	347.095	361.828	45.9421	38.1017	42.3002	80.1071	52.4578	46.109	90.1584	71.3842	80.7066	93.7991	122.065	99.7563	76.1404
LXN	685.98	2.72009	0.269144	10.1079	5.09e-24	2.52e-22	465.027	0.274869	0.269248	1.01139	0.311829	0.51927	1015.98	1145.39	496.77	1126.95	1759	1671.19	144.787	193.136	233.333	162.503	135.516	147.194	133.481	218.414	171.501	176.034	306.102	146.517	186.667
SULF2	4052.91	-2.98747	0.296574	-10.0824	6.61e-24	3.27e-22	4468.9	-2.48714	0.281133	-8.85262	8.55e-19	7.6e-17	975.094	712.532	428.13	950.631	723.604	1179.33	7927.11	8603.11	11801.7	3107.01	5590.5	6636.14	4945.83	5215.31	7625.51	7957.51	1053.52	1083.29	1218.25
VWA1	1316.7	-2.11623	0.210272	-10.0788	6.86e-24	3.38e-22	2534.42	-0.571908	0.212672	-2.68441	0.00726569	0.0323987	326.053	258.591	287.359	780.686	752.178	727.048	1862.74	1738.23	1820.27	3187.12	1663.04	2397.07	2921.37	4483.35	3691.06	4400.85	2922.05	2568.73	2312.05
MPP6	1758.65	1.08916	0.108082	10.077	6.98e-24	3.44e-22	1222.27	0.503635	0.15938	3.16308	0.00156112	0.00928166	2399.92	2942.88	2811.93	1839.13	2105.26	2277.25	1117.93	1382.17	1305.85	870.879	1005.44	1045.14	1324.28	1140.02	977.306	853.187	1697.64	1466.73	1417.19
BEND3P2	46.2871	4.936	0.46632	10.072	7.35e-24	3.61e-22	22.1267	0.874284	1.03993	0.842103	0.39973	0.606459	109.366	91.3502	41.8823	97.1874	105.893	98.3719	0	0	0	1.14439	3.74699	6.50255	0	0	1.26104	0	0	3.11739	0
DIO2	9476.52	3.98288	0.401971	10.0705	7.46e-24	3.66e-22	4966.92	2.45266	0.398393	6.17442	6.64e-10	1.86e-08	14713.3	15882.3	25164.3	11460.7	22020.8	17107.7	3278.6	1738.23	1170.76	178.524	519.582	483.553	523.387	344.136	368.224	236.425	3575.57	1374.77	1436.84
FAM49A	246.99	-3.51512	0.350205	-10.0605	8.26e-24	4.04e-22	445.635	-1.28982	0.242005	-5.32758	9.95e-08	1.83e-06	32.7076	19.6754	6.98038	56.8254	69.7551	49.7513	686.348	325.836	297.466	373.07	437.773	607.692	446.109	530.587	802.021	804.36	279.811	226.011	278.363
DLK1	17323.6	-2.85651	0.284445	-10.0427	9.89e-24	4.83e-22	69252.6	-0.803123	0.18974	-4.21408	2.51e-05	0.000265825	4916.35	4663.08	1590.36	4102.05	4392.89	4362.29	16629.7	32058	39502.9	44850.8	24937.4	25877.8	151285	199023	160143	185222	92974.1	104700	101032
FXYD3	246.631	4.65046	0.463355	10.0357	1.06e-23	5.17e-22	133.923	-1.25622	0.584372	-2.11595	0.0343492	0.109053	468.127	521.399	240.823	277.223	699.232	654.682	9.7453	9.19697	1.36452	51.4974	4.99598	21.2811	70.2533	140.638	94.578	82.2348	11.2675	59.2303	45.0293
NABP1	762.5	1.98066	0.197536	10.0354	1.07e-23	5.18e-22	846.218	0.266059	0.182369	1.46154	0.143868	0.310124	1007.8	1080.74	1049.38	1090.31	1490.07	1518.55	238.064	181.312	171.93	320.428	509.59	491.829	784.495	654.178	706.182	624.471	762.437	840.135	895.673
FAM84A	728.35	4.6159	0.461941	10.0289	1.14e-23	5.52e-22	439.872	1.435	0.2607	5.51049	3.58e-08	7.16e-07	1072.19	907.881	3326.15	671.815	1288.37	1214.38	61.2562	27.5909	2.72904	52.6418	53.7068	61.4786	234.178	238.658	290.039	291.677	938.962	634.388	596.024
PLCH1	90.9628	3.33206	0.33206	10.0269	1.16e-23	5.62e-22	35.2477	-0.910433	0.658863	-1.47603	0.139937	0.304215	152.295	172.863	255.947	99.3117	166.404	139.078	41.7656	22.3355	21.8323	4.57755	6.86947	8.27597	4.68356	6.39261	2.52208	11.5643	0	4.67608	3.27486
CAMK2A	363.476	2.65595	0.265754	9.98462	1.78e-23	8.58e-22	326.335	1.35418	0.39314	3.44294	0.00057542	0.00398305	417.021	267.024	514.221	759.974	943.795	915.877	108.59	90.6559	61.4034	129.316	91.1766	62.6609	84.304	102.282	84.4897	143.911	467.603	171.456	180.936
ANGPT4	44.5663	5.65798	0.500639	9.98484	1.78e-23	8.58e-22	25.4635	3.1681	0.742806	4.15552	3.25e-05	0.000333715	52.1277	63.2425	107.032	76.4753	113.457	115.333	4.17656	0	0	1.14439	0.624498	1.18228	2.34178	5.32718	0	1.28492	58.2156	10.9109	12.2807
NLGN3	441.318	2.42235	0.242666	9.98267	1.82e-23	8.74e-22	2143.99	0.0312017	0.181494	0.193162	0.846832	0.929238	762.495	805.287	389.738	928.326	943.795	653.552	144.787	199.706	124.171	119.016	94.2991	130.642	4785.42	4887.15	4307.71	4074.48	3808.43	5383.73	4682.23
SLIT3	857.943	2.21563	0.222573	9.96767	2.11e-23	1.01e-21	1801.44	1.48456	0.260401	5.70997	1.13e-08	2.5e-07	1781.54	1700.52	1674.13	966.563	1039.6	1208.73	506.756	314.011	593.567	130.46	142.385	237.047	2084.18	1781.41	1174.03	1080.62	3842.23	4345.64	4838.6
ACSS3	362.318	1.74008	0.174588	9.96527	2.16e-23	1.04e-21	272.982	-0.592161	0.39262	-1.52683	0.126804	0.283954	589.758	579.02	533.999	500.807	579.051	572.14	157.317	235.18	152.826	99.5617	165.492	182.662	134.652	190.713	233.292	177.319	75.117	233.804	53.2164
MAP3K5	663.753	2.68388	0.2705	9.94658	2.61e-23	1.25e-21	681.452	2.49797	0.365827	6.83081	8.44e-12	3.17e-10	1104.9	1125.72	895.815	1303.27	1163.14	1246.04	122.512	60.4372	115.984	227.733	399.678	199.805	297.406	274.882	126.104	115.643	1410.32	1087.97	1106.9
SUSD4	83.1004	-3.50478	0.350757	-9.9299	3.09e-23	1.47e-21	107.93	1.11913	0.269288	4.15856	3.2e-05	0.000330239	5.11056	4.21617	26.7581	16.4634	10.9255	7.91498	91.8843	161.604	124.171	186.535	207.333	154.288	81.9622	72.4496	58.0078	79.665	108.92	163.663	203.041
STON2	151.269	2.40795	0.242703	9.91217	3.69e-23	1.76e-21	75.7449	-1.52209	0.574043	-2.70836	0.00676163	0.0306596	295.39	330.266	375.777	172.07	207.584	167.345	47.3343	26.2771	45.0292	52.6418	50.5843	44.9267	10.538	7.45805	35.3091	37.2627	0	4.67608	13.0994
RSPO4	36.3632	2.9208	0.292144	9.90446	3.98e-23	1.89e-21	25.3802	-0.982215	0.449701	-2.17421	0.0296894	0.0973863	69.5036	81.5125	80.2743	45.6728	55.4679	54.2742	16.7062	5.25541	8.18713	9.1551	5.62048	4.72912	22.2469	18.1124	30.265	39.8325	7.5117	10.9109	19.6491
MAFA	309.353	5.00552	0.514173	9.88688	4.75e-23	2.25e-21	101.795	-1.3341	0.342013	-3.8904	0.000100081	0.000896539	390.447	302.159	1802.1	266.601	417.69	457.938	6.96093	3.94156	2.72904	27.4653	20.6084	13.5962	46.8355	51.1409	66.8351	70.6706	28.1689	23.3804	18.8304
GRIK2	395.277	2.31112	0.233896	9.87873	5.15e-23	2.44e-21	597.133	-0.525829	0.433125	-1.17536	0.239849	0.437978	622.466	746.261	581.698	594.808	686.625	731.571	104.414	124.816	130.994	235.744	101.169	82.7597	1317.25	1096.33	1143.76	972.684	783.094	749.731	825.264
CACNA1H	4038.17	2.54961	0.25897	9.87623	5.28e-23	2.5e-21	2118.47	-1.3776	0.388776	-3.59841	0.000320166	0.00244866	6182.75	5190.1	7844.78	6628.93	7274.7	7760.07	597.248	894.734	468.031	2102.24	1972.16	1542.29	177.975	212.022	293.822	429.163	206.572	49.8782	55.6726
OR8B10P	56.0561	7.03194	0.643079	9.87066	5.58e-23	2.63e-21	6.29638	0	0.990777	0	1	1	167.626	155.998	244.313	25.4918	52.1062	27.1371	0	0	0	0	0	0	0	0	0	0	0	0	0
SMYD2	1207.44	1.71324	0.173932	9.85512	6.51e-23	3.07e-21	1045.13	0.379923	0.140099	2.71123	0.00670351	0.0304461	1616.98	1836.84	1713.68	1749.9	2096.86	2016.06	339.693	344.229	530.799	748.429	690.694	805.133	860.603	899.228	694.833	785.086	940.84	1250.07	976.726
IL21R	529.618	-2.21273	0.224801	-9.84978	6.87e-23	3.23e-21	223.876	-0.127519	0.556739	-0.299367	0.76466	0.884438	165.582	141.944	97.7253	308.557	203.382	215.966	857.586	1123.34	710.915	854.857	801.855	873.706	15.2216	4.26174	5.04416	5.13968	0	1.55869	13.9181
ERBB4	92.1622	3.95798	0.396608	9.83779	7.74e-23	3.63e-21	56.2084	2.75527	0.797914	3.4411	0.000579359	0.00400393	244.285	240.321	401.372	63.1984	84.0423	24.8757	5.56874	13.1385	15.0097	4.57755	1.87349	7.68483	3.51267	61.7953	8.82728	6.4246	396.242	118.461	22.924
GYG2	3646.86	2.05492	0.209132	9.83739	7.77e-23	3.64e-21	2515.47	1.27903	0.251898	5.09196	3.54e-07	5.75e-06	7828.35	7348.77	4988.64	4292.18	5222.39	5212.58	1713.78	2286.1	2239.18	841.125	649.477	1139.72	2510.39	2443.04	1440.11	1419.84	4822.51	4916.12	4664.21
CMKLR1	2883.18	-3.28996	0.338514	-9.82938	8.41e-23	3.92e-21	1581.56	-1.2526	0.208704	-6.00667	1.89e-09	4.85e-08	220.776	223.457	221.045	822.641	993.38	1106.97	4910.24	5537.89	5849.7	3359.92	5830.93	5521.25	747.027	771.375	1079.45	973.969	356.806	386.556	371.696
KIAA1456	919.743	1.52545	0.155314	9.82936	8.42e-23	3.92e-21	427.525	0.894531	0.210274	4.25584	2.08e-05	0.00022607	1551.57	1765.17	1788.14	1098.27	826.135	1002.94	836.704	689.773	678.167	276.942	253.546	269.56	365.317	255.705	243.381	200.447	533.33	526.838	436.375
CRNDE	516.61	1.33585	0.135961	9.82519	8.77e-23	4.08e-21	271.407	0.814494	0.242642	3.34628	0.000819036	0.005368	764.539	822.152	835.318	622.955	765.625	642.244	238.064	286.42	259.259	320.428	327.237	315.078	58.5444	77.7768	51.7026	70.6706	150.234	91.9629	104.795
PCDH1	502.47	-2.79174	0.283926	-9.82442	8.84e-23	4.11e-21	596.298	1.00636	0.336846	2.98546	0.00283149	0.0150779	108.344	130.701	88.4181	100.374	115.138	125.509	463.598	300.872	779.141	942.975	1446.96	1427.6	489.432	463.464	180.329	204.302	473.237	815.196	754.854
RHOBTB3	10700.3	2.33736	0.238052	9.81918	9.31e-23	4.32e-21	13023.7	-0.257143	0.306932	-0.817501	0.413642	0.619017	20911.4	21451.8	15697.7	14684.3	17863.2	17076	4297.68	3676.16	3625.53	1286.29	3692.03	4141.53	23606.3	21123.3	23109.8	19317.5	15904.1	17797.2	21068
INTU	1069.77	1.99714	0.203564	9.81162	1e-22	4.64e-21	852.971	-0.2681	0.1445	-1.8551	0.0635826	0.172692	1323.63	1682.25	2761.9	1357.97	1615.29	1571.69	361.968	345.543	418.908	468.055	522.704	407.296	732.976	930.125	822.198	903.298	674.175	611.008	816.258
TMEM151B	45.6267	4.05144	0.404347	9.80845	1.04e-22	4.78e-21	36.0912	-1.44621	0.528183	-2.73258	0.00628407	0.0289212	84.8352	63.2425	59.3332	115.775	105.053	90.457	6.96093	3.94156	6.82261	8.01071	2.49799	0.59114	16.3924	25.5705	27.7429	30.8381	16.9013	6.23477	4.91228
NEDD4L	2027.18	2.23135	0.227779	9.8043	1.08e-22	4.97e-21	1457.39	-1.00321	0.201739	-4.98688	6.14e-07	9.57e-06	2644.2	2455.21	4567.49	2589.54	4170.18	3575.31	643.19	396.784	477.582	910.932	884.913	1010.85	586.615	596.644	841.114	832.628	353.05	338.236	368.421
DOK6	724.112	2.73515	0.279032	9.80248	1.1e-22	5.06e-21	512.188	1.32347	0.279083	4.74491	2.09e-06	2.87e-05	1724.3	1708.95	760.861	1027.11	1195.92	1173.68	157.317	291.675	218.323	65.2301	189.223	176.751	341.899	271.686	262.296	236.425	555.865	802.727	755.673
ETV4	43.9282	-3.86885	0.386427	-9.79888	1.14e-22	5.23e-21	112.352	-2.0147	0.292126	-6.87832	6.06e-12	2.33e-10	2.04422	5.62155	4.65358	5.84187	5.88296	3.39214	54.2953	31.5325	27.2904	153.348	116.781	116.455	98.3547	129.983	105.927	120.782	13.1455	29.6152	35.2047
NFATC2	8006.57	-3.18983	0.331971	-9.79874	1.14e-22	5.23e-21	8873.41	0.52861	0.23442	2.26074	0.0237752	0.0819494	286.191	334.482	168.692	4326.17	3992.01	4599.74	6381.78	5801.97	4992.78	15805.1	24958	24431.8	7608.44	5999.47	6297.63	5482.75	5605.6	9989.66	11989.2
HADH	4109.46	1.34011	0.136958	9.78468	1.31e-22	5.99e-21	2658.8	0.585075	0.172082	3.39793	0.000678988	0.00460018	5885.32	5710.09	4846.71	5235.37	7151.16	6598.83	2493.4	2131.07	2140.93	2946.8	2009.63	2164.17	1408.58	1664.21	1448.93	1535.48	2734.26	2052.8	2046.79
AEBP1	23985.3	-3.34933	0.344849	-9.78159	1.35e-22	6.17e-21	13275.1	-0.000308754	0.276745	-0.00480488	0.996166	1	2670.78	2273.92	1992.9	8483.98	4184.46	4927.64	64465.2	45542.1	57384.9	42494.5	24307.9	29094.8	9235.97	10079	10078.2	10328.2	11109.8	8554.11	10099.7
PTMS	4410.55	-2.14353	0.219416	-9.76827	1.54e-22	7.02e-21	4691.93	-0.46303	0.318282	-1.45641	0.14528	0.312015	1698.75	1190.36	1475.19	1709.54	1776.65	1654.23	6086.64	5640.37	6628.84	13694.9	5544.91	5826.28	4151.97	5009.68	5678.46	5535.43	4065.71	3190.64	3761.17
GRHL1	210.087	1.95119	0.199658	9.76597	1.58e-22	7.17e-21	146.01	-0.206291	0.337936	-0.620164	0.53515	0.72402	192.157	231.889	288.522	437.078	358.86	515.605	79.3546	88.0281	72.3196	81.2515	96.1726	79.804	56.2027	64.9916	89.5339	97.6539	84.5066	49.8782	65.4971
CYP27C1	1473.3	-1.51268	0.154975	-9.76384	1.61e-22	7.31e-21	1102.25	0.151594	0.133068	1.14097	0.253881	0.454574	632.687	646.479	424.64	1060.56	1012.71	884.217	2173.2	1912.97	1768.42	2210.96	2636.63	2316.09	824.306	768.179	1027.75	886.594	970.887	852.605	1091.35
TTC3	48098.9	2.06648	0.211687	9.75724	1.72e-22	7.78e-21	19740.4	0.12843	0.278167	0.459367	0.645971	0.806631	117923	115486	112433	34806.4	45341.7	45481.8	25194.4	25277.2	22915.8	5333.99	12574.3	14419.1	15914.7	13451.1	16616.7	13773	12349.2	17784.7	18890.2
TPM2	19887.1	2.29866	0.235781	9.74895	1.86e-22	8.43e-21	11441.5	0.448612	0.290387	1.53992	0.12358	0.27903	37120	32100.5	36628.4	27525.3	35439.8	30594.8	6892.71	5401.25	7528.06	11063.9	4069.85	4281.04	5599.19	7059.58	5224.49	5783.42	8446.9	8089.62	7777.78
PTPRE	1480.94	-1.87778	0.192617	-9.74648	1.91e-22	8.61e-21	1326.89	-0.893234	0.303745	-2.93771	0.0033065	0.0171115	255.528	314.807	456.051	980.371	802.604	891.001	1496.6	969.623	1214.42	2445.56	4289.05	3655.61	1128.74	1089.94	1399.75	1300.34	1124.88	419.288	429.006
TSPAN33	139.115	2.88951	0.297	9.73074	2.23e-22	1e-20	125.175	2.11471	0.399255	5.27342	1.34e-07	2.4e-06	198.29	185.511	224.536	223.053	315.999	319.991	5.56874	17.0801	28.6549	70.952	43.0903	36.6507	17.5633	21.3087	7.56624	2.56984	50.7039	56.1129	63.041
PRUNE2	4736.75	1.79902	0.185047	9.72075	2.46e-22	1.1e-20	1695.69	-0.366357	0.22668	-1.61756	0.105757	0.250406	8822.86	10745.6	6952.46	5855.67	5634.19	6413.4	1996.39	2179.68	2729.04	1184.44	1983.4	2343.87	838.356	1088.88	1335.44	1220.67	1034.74	799.609	770.41
PDK4	4200.04	2.85556	0.293978	9.71758	2.54e-22	1.14e-20	2555.87	0.511787	0.222717	2.29506	0.0217299	0.0764901	6766.38	7414.83	3457.61	7290.12	10330.5	9431.27	552.698	973.565	1640.15	592.793	982.335	968.288	585.444	641.392	663.307	800.505	794.362	1154.99	934.153
KCNQ5	1524.95	-2.52823	0.260245	-9.71422	2.62e-22	1.17e-20	1953.06	-0.0642645	0.293566	-0.198634	0.842549	0.927144	461.994	470.805	295.503	456.728	383.233	488.467	3626.64	3385.8	2565.3	956.708	2606.65	2601.61	3628.58	2998.14	3208.09	3006.71	2276.04	3397.95	3567.14
RIN1	891.237	-2.20461	0.227389	-9.70717	2.81e-22	1.25e-20	710.458	0.825854	0.25212	3.2687	0.00108044	0.00676263	67.4594	71.6748	87.2547	640.481	452.988	659.205	517.893	415.178	275.633	3635.72	1770.45	2100.91	188.513	228.003	175.285	242.85	339.904	377.204	397.076
TMEM164	6972.22	2.65995	0.273826	9.70725	2.81e-22	1.25e-20	2171.17	-0.097196	0.325151	-0.307584	0.758399	0.881003	13900.7	12004.8	26392.8	5911.97	7666.34	7686.58	1758.33	1692.24	2061.79	875.456	1709.25	2006.33	1013.99	1060.11	944.519	1338.89	518.307	1393.47	1130.64
SERINC5	3140.34	3.1634	0.325651	9.70736	2.81e-22	1.25e-20	1321.62	3.09513	0.457858	6.75961	1.38e-11	5.02e-10	7764.98	7525.85	7911.09	3033.52	4158.41	3920.18	704.446	599.117	728.654	94.9842	613.257	629.565	355.95	299.387	203.028	185.028	3874.16	1661.57	1743.86
PCDHGA5	44.2475	3.61674	0.368101	9.68625	3.45e-22	1.53e-20	81.3984	-0.937447	0.278492	-3.36222	0.000773185	0.00511881	75.6362	95.5664	136.117	58.4187	62.1913	68.9734	5.56874	3.94156	2.72904	11.4439	6.24498	4.13798	114.747	121.46	79.4455	98.9388	71.3611	42.0847	49.9415
FLJ20373	517.053	-0.886417	0.0916666	-9.66975	4.05e-22	1.8e-20	497.984	-0.0878646	0.102438	-0.860781	0.389359	0.596636	363.872	355.563	365.306	370.162	366.424	353.913	606.993	674.006	753.216	621.402	674.457	699.319	375.855	380.361	401.011	438.158	345.538	392.791	381.521
GALNT18	1418.75	-1.21961	0.126242	-9.66107	4.41e-22	1.95e-20	1613.46	-1.0323	0.21893	-4.71511	2.42e-06	3.28e-05	663.35	581.831	666.626	1183.77	984.975	1031.21	1492.42	1462.32	1615.59	2706.48	1862.25	2774.22	1455.41	1990.23	2205.56	2550.57	1211.26	928.981	853.1
HLX	416.692	4.73227	0.502363	9.66117	4.41e-22	1.95e-20	408.444	1.76606	0.783559	2.2249	0.0260882	0.0880728	311.744	205.187	463.032	917.704	1593.44	1398.69	34.8046	19.7078	31.384	12.5883	3.74699	8.27597	35.1267	45.8137	8.82728	7.70952	253.52	17.1456	22.1053
CYR61	33590.5	-1.34277	0.139273	-9.65517	4.67e-22	2.06e-20	56885.7	0.0232131	0.138774	0.170367	0.864722	0.939365	3323.91	3332.18	3590.24	38322.1	35086.8	40579	9114.64	9953.75	11715.8	75436.9	72288.7	100342	63457.5	69724.2	59493.3	60747.1	62841	64808.9	65567.5
CNNM1	361.616	2.73411	0.283035	9.65308	4.77e-22	2.1e-20	134.602	-0.29627	0.419126	-0.717394	0.473131	0.673293	721.611	591.668	985.397	380.783	626.955	500.905	36.1968	90.6559	159.649	91.551	72.4417	81.5774	53.8609	61.7953	49.1806	42.4023	84.5066	29.6152	16.3743
LIMK1	1349.61	-1.33804	0.13867	-9.65184	4.83e-22	2.12e-20	981.846	0.379996	0.185954	2.03959	0.0413917	0.125622	960.785	950.042	1005.17	686.154	525.264	542.742	2013.1	2057.49	1938.98	1868.78	1759.83	1886.92	661.552	642.458	601.516	666.873	997.178	805.844	716.375
BCKDHB	1895.84	1.7376	0.180017	9.64909	4.96e-22	2.17e-20	861.726	0.715329	0.147897	4.83691	1.32e-06	1.9e-05	3603.96	2952.72	5184.09	1903.39	2190.14	1865.67	819.997	998.528	1207.6	567.616	648.853	807.498	636.963	531.652	547.291	556.37	1077.93	874.427	857.193
PHF19	2041.56	-1.89647	0.196759	-9.63946	5.45e-22	2.38e-20	2543.21	-1.18454	0.143931	-8.22708	1.92e-16	1.3e-14	910.701	697.073	637.541	1043.57	851.348	883.086	4049.87	4464.47	3461.79	2688.17	2476.13	2335.01	4081.72	4273.46	4964.72	4718.22	1778.39	2007.6	2144.21
KIT	130.921	5.09612	0.518268	9.63463	5.71e-22	2.49e-20	150.305	-0.0249376	0.931689	-0.105844	0.915706	0.968117	152.295	158.809	110.523	531.61	294.148	295.116	2.78437	9.19697	2.72904	12.5883	1.249	0	24.5887	18.1124	30.265	32.123	63.8494	4.67608	4.91228
SRRM3	358.658	-2.10554	0.218778	-9.62594	6.21e-22	2.71e-20	176.504	-0.126652	0.511939	-0.332061	0.739843	0.869805	114.477	102.593	82.6011	198.092	165.563	146.993	572.188	521.6	491.228	964.719	460.879	482.962	4.68356	9.58892	8.82728	10.2794	5.63377	12.4695	4.91228
STAC2	1747.31	-3.45582	0.361564	-9.62354	6.36e-22	2.77e-20	646.869	-3.18014	0.390427	-8.11084	5.03e-16	3.23e-14	190.113	178.484	105.869	552.853	289.105	289.462	5794.28	4040.1	2774.07	2347.14	1812.29	2593.93	126.456	116.132	194.2	240.28	7.5117	12.4695	27.0176
DLL1	123.734	2.46513	0.255904	9.62197	6.46e-22	2.81e-20	183.408	0.113175	0.303785	0.368	0.712873	0.852648	278.014	192.538	302.483	130.645	171.446	195.613	34.8047	18.3939	40.9356	43.4867	36.8454	39.6064	104.209	145.965	119.799	228.716	230.985	135.606	122.807
CAPN2	6119.39	-1.43621	0.149682	-9.59713	8.22e-22	3.56e-20	6979.4	0.188967	0.159178	1.18569	0.235745	0.432814	1893.97	1439.12	2168.57	5532.25	4490.38	4518.32	6035.13	5163.44	4677.58	9831.43	14243.5	13439	4692.92	5451.84	4431.3	5364.54	5723.91	5720.4	5612.28
UBE2D1	386.328	1.34591	0.140306	9.59341	8.52e-22	3.69e-20	500.563	0.879214	0.262667	3.34531	0.000821907	0.00538093	419.066	430.049	344.365	671.815	790.838	669.381	140.611	144.524	156.92	222.011	336.604	309.758	255.254	322.827	325.348	370.057	927.694	413.054	434.737
TSPAN2	940.135	-3.26086	0.341511	-9.59194	8.64e-22	3.74e-20	762.173	0.178845	0.527135	0.300829	0.763545	0.884054	112.432	112.431	87.2547	287.314	227.755	160.561	2350.01	2244.06	2004.48	635.135	1292.09	1768.1	88.9875	106.544	287.517	380.336	488.26	123.137	117.895
ALDH1A1	73.3487	7.16909	0.690409	9.58845	8.94e-22	3.86e-20	46.7611	-0.329174	0.975943	-0.675679	0.499244	0.694976	88.9237	101.188	429.293	29.2093	118.5	113.071	0	0	0	0	0	0	1.17089	0	0	6.4246	0	3.11739	0
TREX2	65.1176	-2.40203	0.250239	-9.57596	1.01e-21	4.35e-20	36.5943	-0.681559	0.478355	-1.43769	0.150521	0.319906	20.4422	16.8647	17.4509	26.0229	18.4893	18.0914	128.081	106.422	132.358	129.316	66.1967	101.676	31.614	10.6544	26.4818	32.123	13.1455	24.9391	9.00585
SMOC1	2197.14	-2.20837	0.231246	-9.55447	1.24e-21	5.34e-20	2216.14	-2.7519	0.280905	-9.79979	1.13e-22	1.47e-20	485.503	555.128	693.384	1457.81	758.902	740.616	2153.71	3179.52	4482.45	4245.68	3901.24	3711.77	2210.64	2716.86	3377.07	3757.11	555.865	361.617	390.527
ANO1	188.296	-2.67661	0.28006	-9.54247	1.39e-21	5.98e-20	1143.19	-2.15311	0.337594	-6.35923	2.03e-10	6.2e-09	45.995	49.1886	70.9672	33.458	42.8616	37.3135	551.306	201.019	599.025	152.204	227.942	248.279	1235.29	1510.79	3587.66	3506.55	661.029	431.758	523.977
GREM1	5186.74	-2.67186	0.279994	-9.54236	1.4e-21	5.98e-20	5765.56	-3.79028	0.242571	-15.6224	5.12e-55	8.06e-52	1682.39	1475.66	665.463	1372.31	1482.51	1179.33	7222.66	15066	11625.7	4188.46	8153.44	8127	10361.2	11222.2	15688.6	15709.4	724.879	1008.47	1057.78
GRIK5	224.666	-2.04626	0.214363	-9.54026	1.42e-21	6.09e-20	199.519	-2.89272	0.406831	-7.09871	1.26e-12	5.34e-11	95.0564	92.7556	90.7449	99.8428	63.8721	63.3199	464.99	593.862	275.633	321.573	264.787	269.56	108.893	170.47	234.553	264.693	13.1455	12.4695	42.5731
ISM1	706.687	1.74961	0.183646	9.53874	1.45e-21	6.17e-20	674.685	-3.49719	0.261946	-13.3336	1.48e-40	8.8e-38	1592.45	1517.82	1745.09	511.429	542.073	490.729	817.213	446.71	443.469	124.738	126.149	122.366	1364.09	1507.59	1820.94	2388.67	191.548	121.578	145.731
DGKA	1636.59	-1.91433	0.200691	-9.53832	1.45e-21	6.18e-20	975.397	-1.21947	0.282701	-4.32037	1.56e-05	0.000175566	651.085	833.395	523.528	759.443	664.774	625.284	3731.06	2181	1970.37	3291.26	2396.2	2011.65	683.799	491.166	1040.36	1021.51	473.237	325.767	234.152
CD82	897.867	-1.53699	0.161207	-9.53423	1.51e-21	6.42e-20	759.284	-1.31022	0.254403	-5.16074	2.46e-07	4.12e-06	309.7	324.645	378.104	651.103	542.913	539.35	1023.26	924.952	1057.5	2259.02	1565.62	1198.24	441.425	425.109	726.359	690.002	242.252	191.719	246.433
EMILIN2	1220.01	2.66027	0.278775	9.53204	1.54e-21	6.55e-20	1276.55	-0.294931	0.403363	-0.753096	0.451392	0.654159	1338.97	1017.5	1206.44	4892.83	2159.05	2254.64	214.397	228.61	282.456	534.429	234.187	276.654	297.406	335.612	643.13	692.572	510.795	339.795	338.948
LCTL	704.788	2.0414	0.214758	9.51539	1.81e-21	7.67e-20	559.257	1.09613	0.249953	4.40896	1.04e-05	0.000122063	1270.48	1191.77	1123.84	825.296	1298.45	1067.39	171.239	204.961	196.491	383.37	332.233	391.926	443.767	534.849	247.164	278.827	799.996	832.342	812.983
IGSF10	2548.55	2.76017	0.290649	9.50103	2.08e-21	8.79e-20	650.929	0.0664765	0.389043	0.143992	0.885507	0.95071	4881.6	4535.19	10621.8	1464.71	2623.8	2620.99	1624.68	769.918	556.725	323.862	245.428	313.896	293.893	110.805	157.63	96.369	253.52	135.606	127.719
AC007362.1	290.974	-2.11249	0.222682	-9.4995	2.11e-21	8.91e-20	257.401	1.68961	0.314865	5.35389	8.61e-08	1.61e-06	42.9287	61.8371	53.5162	163.041	217.669	157.169	439.931	223.355	274.269	589.36	631.367	637.25	49.1773	76.7114	61.791	66.8158	345.538	120.019	167.018
KCND3	282.43	2.80702	0.296636	9.49716	2.16e-21	9.09e-20	86.0376	-0.618762	0.460118	-1.42484	0.154204	0.324976	733.876	801.071	392.065	296.873	362.222	332.429	72.3937	149.779	163.743	19.4546	37.4699	27.7836	9.36711	6.39261	12.6104	16.7039	7.5117	9.35216	4.91228
OXCT2	215.384	2.467	0.25972	9.49281	2.25e-21	9.46e-20	128.048	3.94102	0.482878	8.09059	5.94e-16	3.78e-14	241.218	206.592	451.398	294.218	537.87	468.115	48.7265	47.2987	55.9454	107.572	50.5843	75.0748	12.8798	0	12.6104	8.99444	202.816	137.165	102.339
EPHB2	1246.78	-2.21606	0.233309	-9.48595	2.4e-21	1.01e-19	1212.35	-2.29555	0.289737	-7.94215	1.99e-15	1.19e-13	356.717	326.05	298.993	510.898	404.243	412.71	1201.46	789.626	1094.35	2622.94	3982.42	2961.02	402.786	548.699	935.692	1022.8	142.722	157.428	131.813
ANKMY2	1229.12	1.12558	0.118658	9.4859	2.4e-21	1.01e-19	956.511	0.730287	0.136653	5.34311	9.14e-08	1.69e-06	1786.65	1846.68	1432.14	1617.67	1759	1679.11	833.919	811.961	815.984	587.071	746.899	832.326	716.584	704.253	564.946	629.611	1171.82	1039.65	1052.87
CDKN3	284.703	-1.7272	0.182204	-9.47751	2.6e-21	1.09e-19	374.134	-0.613855	0.229092	-2.67871	0.00739058	0.0328825	91.99	92.7556	79.1109	170.476	160.521	186.567	363.361	271.968	237.427	801.071	475.867	485.326	367.659	486.904	496.85	557.655	251.642	289.917	384.796
AQP4	66.8096	3.86498	0.406043	9.47794	2.59e-21	1.09e-19	71.6227	-0.636159	0.509374	-1.21798	0.223231	0.417206	129.808	119.458	246.64	74.351	79.8402	94.9798	16.7062	22.3355	12.2807	1.14439	0.624498	3.54684	112.405	134.245	112.233	127.207	159.624	31.1739	44.2105
FBLN1	7574.22	-2.40406	0.254316	-9.47592	2.64e-21	1.1e-19	8311.59	-2.27317	0.211137	-10.7776	4.39e-27	9.31e-25	1765.19	1564.2	1342.56	3806.77	2925.51	3223.66	15813.8	13714	14534.9	10757.2	9347.48	12095.3	5506.69	6908.29	8483.02	9875.89	1626.28	1660.01	1422.92
NIPAL4	33.4229	-3.08291	0.322053	-9.46891	2.83e-21	1.18e-19	27.3926	1.20543	0.555745	2.16558	0.0303437	0.0990607	4.08845	1.40539	2.32679	13.808	8.40423	7.91498	29.2359	30.2186	20.4678	83.5403	108.038	91.6268	19.9051	2.13087	10.0883	5.13968	26.2909	10.9108	29.4737
GFPT2	9890.91	1.55719	0.16464	9.4601	3.08e-21	1.28e-19	8068.22	1.25836	0.196035	6.42841	1.29e-10	4.07e-09	15457.4	15088.2	14020.1	12252.5	15991.6	15671.7	4979.85	4243.74	3261.21	4729.75	6637.78	6357.13	7054.6	6258.37	4764.21	3987.11	14176.5	12489.8	13210
RHBDL2	213.705	2.03978	0.215564	9.45843	3.13e-21	1.3e-19	399.454	1.93054	0.359639	5.40376	6.53e-08	1.25e-06	309.7	299.348	537.489	230.488	390.797	306.423	91.8843	70.9481	77.7777	99.5617	75.5642	74.4837	551.489	460.268	171.501	218.436	1098.59	1619.48	1455.67
CAMK2N1	67.8204	-2.22162	0.234528	-9.45384	3.27e-21	1.35e-19	98.622	-1.33551	0.297971	-4.48194	7.4e-06	9e-05	24.5307	15.4593	16.2875	30.8026	30.2552	21.4835	80.7468	110.364	72.3196	101.85	143.634	166.111	97.1838	101.216	116.016	142.626	30.0468	38.9673	59.7661
C1orf198	9647.43	1.53302	0.162283	9.44648	3.5e-21	1.45e-19	6768.24	0.0662161	0.189087	0.34998	0.726354	0.861225	14596.8	13758.8	18064.1	10968.4	14824.2	14101.1	4968.71	4020.39	5523.58	3641.44	5762.24	5539.58	4491.53	5244.07	6335.47	6532.53	6456.3	5428.93	5868.54
MGP	38717.5	-1.85979	0.196995	-9.4427	3.63e-21	1.5e-19	22570.9	1.54621	0.2959	5.22246	1.77e-07	3.09e-06	14333.1	14725.7	12699.6	21083.8	18670	18522.2	57633.7	49600.6	69445.9	94666	46111.6	47117.4	5676.47	8168.7	7706.22	9454.44	34615.8	15954.8	18455.4
MRAS	2673.78	1.67477	0.17746	9.43671	3.85e-21	1.59e-19	1457	1.68729	0.220669	7.64274	2.13e-14	1.15e-12	4528.98	3624.5	5715.77	2899.16	3907.12	3873.82	1388.01	1467.57	1117.54	845.702	1268.36	1448.88	475.381	559.354	426.231	576.929	1984.97	1674.04	1316.49
PCSK2	203.327	3.77689	0.400555	9.4261	4.26e-21	1.75e-19	429.095	-5.93504	0.381785	-15.3229	5.38e-53	7.9e-50	430.309	268.429	103.542	333.517	658.051	505.428	15.314	27.5909	43.6647	27.4653	11.241	15.3697	996.426	1386.13	1170.24	1367.15	15.0234	18.7043	19.6491
ARAP3	324.188	-2.21021	0.234424	-9.42156	4.44e-21	1.83e-19	673.867	-1.49618	0.276456	-5.41412	6.16e-08	1.18e-06	120.609	116.647	63.9868	155.606	96.6486	97.2412	395.381	441.455	282.456	850.28	689.445	580.5	836.015	917.34	892.816	984.248	193.426	380.321	373.334
MYO1D	11812.2	-2.25846	0.239995	-9.41924	4.54e-21	1.86e-19	6109.29	-0.352068	0.19211	-1.83083	0.0671257	0.179911	2780.14	2803.75	3753.12	6204.59	4077.73	4317.06	24306.2	20309.5	25919.1	12169.4	16313.1	18792.4	3827.64	4077.42	4314.02	4263.36	3414.07	3156.35	3102.93
TNFAIP6	97.7407	-2.52053	0.267166	-9.41189	4.87e-21	1.99e-19	550.731	-0.114636	0.272089	-0.40924	0.682363	0.832135	15.3317	25.297	32.5751	27.085	29.4148	31.6599	135.042	69.6342	107.797	197.979	217.325	283.747	744.685	757.525	862.551	976.539	388.73	1022.5	901.404
ARHGAP31	4913.78	1.83768	0.195229	9.40906	5.01e-21	2.05e-19	2352.34	0.190157	0.239973	0.790437	0.429273	0.63356	10532.9	9691.56	10741.6	4563.56	5453.5	5693.13	1974.12	2315.01	2815.01	1060.85	1888.48	2235.69	1780.92	1640.77	1611.61	1657.55	1479.8	2016.95	2230.18
KLHL29	2604.88	-1.51859	0.161432	-9.40756	5.08e-21	2.07e-19	1765.8	-1.25389	0.169088	-7.41856	1.18e-13	5.83e-12	1389.05	1381.5	873.711	1607.58	1290.89	1507.24	4367.29	3929.73	3811.11	2999.44	4151.04	3950	1558.45	1435.14	1800.77	1597.15	516.429	729.468	747.486
PLXNA4	617.084	-2.97356	0.316194	-9.39968	5.47e-21	2.23e-19	373.411	-0.90972	0.408334	-2.24771	0.0245946	0.0840638	222.82	154.593	50.026	119.493	132.787	98.3719	1080.34	1344.07	1389.08	430.29	1133.46	1249.67	128.798	239.723	161.413	343.074	54.4598	149.635	133.45
SLC45A3	234.083	-1.79991	0.191902	-9.37689	6.79e-21	2.76e-19	144.322	-0.416917	0.246313	-1.6957	0.0899435	0.222697	112.432	88.5395	75.6208	118.431	110.095	102.895	434.362	495.322	379.337	256.343	334.731	300.89	124.114	122.525	74.4014	116.928	65.7273	91.9629	85.965
PSCA	83.1835	3.94686	0.417639	9.34907	8.84e-21	3.59e-19	14.8651	0.0228668	0.749213	-0.014919	0.988097	1	222.82	120.863	396.718	59.4808	82.3614	73.4963	4.17656	6.56926	8.18713	12.5883	5.62048	5.32027	2.34178	2.13087	6.3052	1.28492	1.87792	4.67608	2.45614
PAMR1	215.859	1.91481	0.204865	9.33976	9.66e-21	3.91e-19	1978.98	1.23596	0.217848	5.6833	1.32e-08	2.87e-07	282.103	248.754	157.059	446.637	492.488	443.239	66.8249	65.6927	85.9648	102.995	76.1887	122.366	1455.41	1750.51	1761.67	2306.43	5667.57	3920.11	3378.83
ASTL	214.939	3.57207	0.376708	9.33826	9.79e-21	3.96e-19	222.58	-1.01797	0.277853	-3.64665	0.000265677	0.00208513	30.6633	22.4862	17.4509	1092.43	600.062	684.081	4.17656	6.56926	1.36452	48.0643	40.5923	31.3304	152.215	106.544	114.755	107.933	56.3377	60.789	59.7661
HRC	55.9046	4.41006	0.463066	9.33405	1.02e-20	4.12e-19	52.3542	0.598063	0.70526	0.843714	0.398829	0.60589	140.029	157.403	108.196	138.08	52.1062	46.3592	11.1375	11.8247	2.72904	0	0.624498	2.36456	31.614	42.6174	7.56624	19.2738	86.3845	7.79347	27.0176
BAMBI	3626.11	1.75724	0.188757	9.33157	1.04e-20	4.21e-19	7449.59	0.811765	0.173979	4.67797	2.9e-06	3.87e-05	3002.96	2789.7	3030.65	6938.01	8405.91	8222.54	533.207	584.665	772.319	3673.48	2592.91	2966.93	9458.44	11367.1	7020.21	8057.73	14843.1	16957	15680.8
TMEM132A	363.549	-2.48265	0.266365	-9.32217	1.14e-20	4.59e-19	619.259	-2.72982	0.32708	-8.36046	6.25e-17	4.43e-15	116.521	75.891	186.143	77.5375	95.8082	91.5877	616.738	475.615	575.828	1024.23	495.851	530.844	271.646	316.434	416.143	583.353	45.0702	81.052	45.848
AOC2	1554.81	1.49497	0.160355	9.32041	1.16e-20	4.66e-19	869.3	0.768087	0.217159	3.53174	0.000412839	0.00302173	1613.91	1364.63	2084.81	2532.18	3222.18	3098.15	608.385	767.29	747.758	821.67	990.453	806.316	165.095	123.591	179.068	136.202	353.05	169.898	253.801
ACTG2	238.221	3.26345	0.351439	9.31305	1.24e-20	4.98e-19	96.9129	-0.864769	0.643496	-1.41256	0.157786	0.330441	502.879	482.048	752.717	347.857	270.616	220.489	79.3546	82.7727	65.497	21.7434	3.12249	29.557	16.3924	9.58892	18.9156	14.1341	0	7.79347	12.2807
MGST2	287.629	1.78861	0.192051	9.31222	1.25e-20	5.01e-19	194.033	1.17024	0.29061	4.01587	5.92e-05	0.000562808	395.557	477.832	499.097	417.428	458.03	435.324	83.5312	118.247	137.817	185.391	94.9236	148.376	60.8862	82.0386	65.5741	51.3968	215.961	130.93	103.158
TRIB2	799.498	-1.27993	0.137468	-9.31191	1.26e-20	5.02e-19	1601.67	0.301935	0.11662	2.59013	0.00959398	0.0404933	441.552	379.455	316.444	560.819	587.455	529.173	1201.46	911.814	1113.45	1160.41	1276.47	1115.48	1707.16	1884.76	1524.6	1843.86	1864.78	2375.45	2194.97
PCSK5	483.741	-1.39099	0.149345	-9.31065	1.27e-20	5.07e-19	852.715	0.0604795	0.189059	0.319672	0.749217	0.875248	194.201	167.241	238.496	286.251	355.499	314.338	537.384	396.784	444.834	861.724	952.359	1055.78	898.072	931.191	799.499	846.762	897.648	794.933	1023.39
CARD10	159.935	-2.43373	0.261906	-9.31036	1.27e-20	5.08e-19	198.585	0.0840822	0.396166	0.178922	0.857999	0.936455	14.3096	11.2431	17.4509	118.431	66.3934	97.2412	128.081	111.677	118.713	572.194	347.221	316.26	71.4242	49.01	84.4897	57.8214	118.309	62.3477	31.1111
MAOA	1329.54	3.68994	0.40139	9.30489	1.34e-20	5.34e-19	367.567	-0.785247	0.418652	-1.93027	0.0535727	0.152869	2755.61	2699.75	5120.11	1021.79	1715.3	1664.41	91.8843	59.1234	111.891	298.685	195.468	220.495	29.2722	14.9161	51.7026	19.2738	11.2675	10.9108	22.924
GUCY1B3	128.791	2.4145	0.259288	9.30258	1.37e-20	5.44e-19	173.537	-1.41545	0.416589	-3.43603	0.000590316	0.00407073	250.417	300.753	168.692	212.431	172.287	202.397	36.1968	36.7879	73.6841	16.0214	36.2209	39.6064	44.4938	46.8792	116.016	129.777	43.1923	29.6152	19.6491
SPATA9	42.8708	3.25644	0.346402	9.30272	1.37e-20	5.44e-19	25.7101	1.74592	0.464948	3.75546	0.000173024	0.00144161	91.99	111.026	81.4377	56.8254	74.7976	57.6663	4.17656	5.25541	8.18713	2.28877	13.1144	7.68483	10.538	15.9815	7.56624	15.419	69.4832	31.1739	32.7486
KIF26B	3275.6	2.26401	0.243511	9.29603	1.46e-20	5.77e-19	2229.34	1.44876	0.340915	4.26835	1.97e-05	0.000215776	6326.87	5726.96	7028.08	4064.34	4704.69	4934.43	1220.95	1365.09	822.806	470.343	1156.57	1486.13	2098.23	1490.55	1239.6	854.471	3457.26	4125.86	4353.1
BMPR1B	638.627	-2.18841	0.23573	-9.28634	1.6e-20	6.31e-19	579.335	1.5035	0.261107	5.7644	8.2e-09	1.87e-07	169.67	224.862	148.915	305.901	289.105	228.404	829.743	1283.63	1015.2	575.627	1322.69	1269.77	382.881	363.314	340.481	256.984	1040.37	952.361	906.316
AIF1	77.5038	-4.60197	0.479606	-9.28466	1.62e-20	6.4e-19	181.671	-2.57506	0.377053	-6.7788	1.21e-11	4.42e-10	6.13267	7.02694	0	4.77971	0.840423	1.13071	204.651	314.011	264.717	66.3745	23.7309	36.6507	464.843	777.768	530.898	588.493	56.3377	127.813	102.339
DSC2	1138.48	2.97706	0.322074	9.27122	1.84e-20	7.24e-19	514.956	2.07791	0.424182	4.88224	1.05e-06	1.54e-05	2151.54	2213.49	2387.29	1498.7	2114.5	1792.18	197.69	124.816	158.284	128.171	378.446	516.657	32.7849	30.8976	44.1364	46.2571	296.712	102.874	112.983
FILIP1	92.4082	3.0899	0.331337	9.27138	1.84e-20	7.24e-19	58.6705	-1.65902	0.473724	-3.52584	0.00042214	0.00307246	222.82	269.835	303.646	62.1362	70.5955	89.3262	6.96093	17.0801	28.6549	8.01071	16.2369	13.5962	29.2722	20.2433	26.4818	23.1286	5.63377	3.11739	10.6433
PTPN11	14705	1.85978	0.200809	9.26313	1.99e-20	7.8e-19	7912.52	0.0600915	0.241598	0.239528	0.810697	0.909304	22476.2	24547.9	19872	22318.6	25467.3	23856.9	5497.74	5158.19	5347.56	3849.72	8526.26	9541.6	3181.3	2446.24	3172.78	2456.77	2713.6	2959.96	3116.84
C16orf89	169.643	2.93976	0.317088	9.26032	2.04e-20	7.99e-19	104.905	0.219802	0.368184	0.622182	0.533822	0.723316	276.992	203.781	447.908	195.968	379.871	307.554	43.1578	28.9048	51.8518	59.5082	22.4819	17.7342	93.6711	94.8238	84.4897	62.9611	101.408	113.785	82.6901
AVPI1	1193.58	1.53431	0.165738	9.25918	2.06e-20	8.06e-19	2316.85	-0.0398197	0.198031	-0.179766	0.857336	0.935981	1292.97	941.61	963.292	2426.5	2440.59	2557.67	345.262	314.011	384.795	1201.61	649.477	805.133	3906.09	4667.67	3417.42	3653.03	3021.58	4277.05	4143.51
DOC2B	33.8124	-5.26583	0.508187	-9.25733	2.1e-20	8.19e-19	24.0564	-4.21925	0.893112	-4.65382	3.26e-06	4.29e-05	2.04422	2.81078	3.49019	0	0	0	87.7077	60.4372	68.2261	34.3316	79.3112	67.39	23.4178	20.2433	11.3494	19.2738	0	0	0
EEF2K	4037.66	1.5113	0.163349	9.25589	2.12e-20	8.29e-19	2157.13	-0.169972	0.179126	-0.952706	0.340739	0.548636	7049.5	6256.79	7699.36	4641.1	4727.38	5219.37	3316.19	2589.6	2622.61	1021.94	1539.39	1768.69	1478.83	1375.48	1694.84	1331.18	1258.21	1472.96	1186.32
CYP4X1	69.0361	2.2923	0.247278	9.25464	2.15e-20	8.37e-19	94.1441	1.96744	0.26406	7.44504	9.69e-14	4.82e-12	71.5478	71.6748	88.4181	183.753	139.51	134.555	2.78437	14.4524	21.8323	35.476	33.0984	31.3304	39.8102	34.0939	29.0039	48.8269	199.06	118.461	137.544
LHFPL1	62.4598	3.51688	0.377105	9.24557	2.34e-20	9.1e-19	56.5123	0.178197	0.336031	0.54749	0.584042	0.762271	149.228	165.836	43.0457	73.2889	124.383	141.339	4.17656	7.88312	12.2807	6.86632	9.36746	11.8228	72.5951	66.057	76.9235	51.3968	56.3377	96.639	74.503
CD80	107.154	3.79535	0.413227	9.23878	2.49e-20	9.68e-19	50.5624	-0.436042	0.884622	-0.686032	0.492693	0.689251	233.041	189.727	146.588	212.431	221.872	193.352	8.35312	30.2186	35.4775	5.72194	3.74699	5.32026	2.34178	1.06544	2.52208	0	0	0	1.63743
CCDC88A	11420.9	1.6776	0.181601	9.23728	2.53e-20	9.8e-19	8201.83	0.0542255	0.229417	0.233614	0.815285	0.91188	18418.4	20860.2	22925.9	12263.1	15405.8	14996.6	6068.54	6306.49	6230.4	2597.76	5531.17	5446.77	7149.45	5676.64	7431.31	6614.77	5892.93	7487.96	7540.35
CA12	11444.8	3.78992	0.415806	9.2318	2.66e-20	1.03e-18	5060.1	4.0574	0.428619	9.45303	3.29e-21	3.68e-19	24385.5	21474.3	25947.2	14307.3	21287.9	20988.3	1307.26	352.113	356.14	1148.96	1961.55	3820.54	266.963	209.891	143.759	105.363	5718.28	2027.86	2209.71
MAPK4	55.0769	2.81207	0.303027	9.22754	2.77e-20	1.07e-18	48.4494	-1.81554	0.577693	-3.14614	0.00165443	0.00971594	56.2161	56.2155	60.4966	176.318	104.212	131.163	0	14.4524	12.2807	16.0214	19.3594	14.1874	8.19622	12.7852	23.9598	17.9889	0	0	8.18714
KCNH2	1028.94	2.64718	0.287748	9.22667	2.79e-20	1.08e-18	655.016	0.737186	0.187576	3.93386	8.36e-05	0.000763745	2119.86	1782.03	1995.22	1262.37	1731.27	1668.93	392.596	716.05	208.772	144.193	138.638	187.392	398.102	459.203	455.235	549.946	933.328	768.436	641.053
AC007950.1	31.4823	6.51489	0.670322	9.22364	2.87e-20	1.11e-18	5.83792	-0.175146	1.20367	-0.242695	0.808242	0.908134	96.0785	96.9718	82.6011	19.1188	41.1807	41.8363	0	0	0	0	0	0	1.17089	0	0	0	0	0	0
NGEF	2368.07	-1.39064	0.15078	-9.22127	2.94e-20	1.13e-18	1567.91	-1.11779	0.242672	-4.61206	3.99e-06	5.16e-05	975.094	995.015	1094.76	1471.62	1513.6	1635.01	3227.09	2428	1741.13	4762.94	4235.34	4337.2	708.388	710.646	929.387	1180.84	614.081	294.593	306.199
PGBD1	216.818	-1.34209	0.145669	-9.2133	3.16e-20	1.21e-18	338.5	-0.400283	0.123463	-3.24057	0.00119289	0.00738308	114.476	92.7556	84.9279	161.448	145.393	136.816	257.554	307.442	316.569	308.985	327.861	347.591	470.697	442.156	480.456	452.292	298.59	397.467	348.772
SLC25A18	148.436	4.28494	0.468417	9.20319	3.47e-20	1.33e-18	47.62	-0.637334	0.517715	-1.24906	0.211644	0.40338	332.186	189.727	645.685	149.233	186.574	212.574	4.17656	3.94156	5.45808	17.1658	26.2289	8.27597	19.9051	6.39261	29.0039	12.8492	9.38962	12.4695	9.82457
CYP27A1	2047.9	1.72706	0.187685	9.20193	3.52e-20	1.35e-18	1180.32	0.623921	0.208152	2.9936	0.00275707	0.0147566	3325.95	2339.97	4060.25	2312.32	3418	3474.68	948.079	855.318	865.106	1293.16	767.507	914.494	464.843	516.736	456.497	458.716	875.113	712.323	616.492
SEMA3A	1784.29	-2.55443	0.277698	-9.19882	3.62e-20	1.38e-18	1938.61	-3.84642	0.438443	-8.79606	1.42e-18	1.23e-16	585.67	612.749	362.98	556.039	433.658	404.795	2753.74	2655.3	2251.46	1414.46	4621.91	4758.68	1485.86	1554.47	3385.89	3677.44	259.154	91.9629	124.445
ADAMTS6	2791.95	-2.35742	0.256399	-9.19724	3.67e-20	1.4e-18	1424.86	0.0859686	0.296324	0.288631	0.772863	0.888859	1061.97	1418.04	1311.15	507.18	516.02	580.055	7778.14	7390.42	3921.63	1333.21	3821.3	3864.29	925.002	810.797	1083.23	1058.77	1115.49	787.14	1184.68
NEB	802.144	1.24621	0.13551	9.19514	3.75e-20	1.43e-18	269.547	-0.752195	0.286535	-2.64017	0.00828647	0.036018	1427.89	1499.55	1789.3	600.119	801.763	688.604	579.149	689.773	635.867	360.482	308.502	244.732	224.811	117.198	181.59	113.073	90.1404	96.639	93.3334
GLIS2	1472.74	-2.01244	0.219172	-9.18708	4.04e-20	1.54e-18	1660.98	-0.784024	0.169251	-4.63322	3.6e-06	4.69e-05	521.277	510.156	352.509	762.629	616.87	661.466	2810.82	3020.55	2809.55	2094.23	1720.49	1792.34	2106.43	2158.57	2058.02	2071.29	959.619	1237.6	1440.12
G0S2	1232.76	-4.15063	0.444368	-9.18107	4.27e-20	1.62e-18	1071.83	-1.16799	0.235811	-4.95401	7.27e-07	1.12e-05	27.597	32.3239	15.1242	62.1362	81.521	80.2805	218.573	177.37	106.433	6162.53	3743.86	4085.37	224.811	324.958	237.076	269.833	95.7741	152.752	102.339
XK	46.8336	2.44945	0.266091	9.16632	4.89e-20	1.86e-18	32.6048	1.92413	0.412711	4.64988	3.32e-06	4.36e-05	77.6805	105.404	112.849	62.1362	58.8296	63.3199	8.35312	21.0216	20.4678	5.72194	14.9879	11.2317	12.8798	13.8507	2.52208	16.704	45.0702	45.2021	46.6667
HMCN1	3275.39	-2.09829	0.228606	-9.1637	5.01e-20	1.9e-18	2042.76	-2.63233	0.334748	-7.8727	3.47e-15	2.01e-13	1633.33	1492.52	1346.05	646.323	491.647	931.707	9408.39	9580.61	6916.76	1504.87	2671.6	2680.82	2520.92	2627.36	3977.32	3258.56	435.678	681.149	325.029
SEMA3C	2072.37	-3.03237	0.331128	-9.15934	5.22e-20	1.97e-18	2518.16	-0.0497869	0.365309	-0.142802	0.886447	0.951302	252.461	375.239	522.365	459.383	442.903	395.749	4659.65	4129.44	5141.52	774.75	3807.56	3907.44	1878.11	1960.4	1785.63	2090.56	2063.84	1762.88	1749.59
IER3	8085.25	-2.13452	0.233935	-9.15539	5.42e-20	2.04e-18	896.104	-2.27904	0.278512	-8.13695	4.05e-16	2.64e-14	152.295	153.187	125.647	6397.9	6257.79	6237.01	1215.38	427.002	604.483	29663.7	19291.3	26497.3	1136.93	1618.4	1643.13	2282.02	428.167	288.358	305.38
RBP4	583.269	3.09687	0.338772	9.15125	5.63e-20	2.12e-18	764.203	1.23084	0.451335	2.74974	0.00596424	0.0277811	1904.19	1548.74	540.979	1274.59	371.467	645.636	172.631	120.874	216.959	67.5189	49.3353	86.3065	850.065	1170.91	481.717	435.588	1256.33	2314.66	1811.81
WDFY2	880.179	1.61958	0.177134	9.14109	6.18e-20	2.33e-18	395.511	0.904435	0.223154	4.0476	5.17e-05	0.000499021	1575.07	1796.09	2021.98	763.16	865.635	1004.07	600.032	562.329	488.499	189.968	400.927	294.388	169.779	136.376	156.369	169.609	294.834	280.565	314.386
KCNB1	49.0879	2.75367	0.299292	9.13944	6.28e-20	2.36e-18	20.2377	-1.89748	0.662399	-2.82132	0.00478265	0.0232039	116.521	164.43	110.523	54.17	41.1807	37.3135	12.5297	7.88312	17.7388	9.1551	8.74297	8.86711	5.85444	9.58892	7.56624	11.5643	3.75585	1.55869	0.818714
NXPH4	395.783	-3.15951	0.345785	-9.1374	6.4e-20	2.4e-18	397.035	-1.66057	0.303324	-5.46245	4.7e-08	9.22e-07	82.791	82.9179	19.7777	95.5942	84.0423	52.0127	1241.83	940.719	669.98	453.177	360.335	666.215	751.711	849.152	679.701	722.125	161.501	277.447	259.532
U82695.9	417.695	-3.65228	0.399388	-9.13389	6.61e-20	2.47e-18	484.925	0.275688	0.327741	0.873099	0.382609	0.590202	85.8573	51.9994	5.81698	69.5713	48.7445	57.6663	792.154	797.509	498.05	1471.68	521.456	611.831	744.685	868.33	548.552	537.096	869.479	791.816	817.077
AC141586.5	1317.38	2.25574	0.247147	9.12878	6.93e-20	2.59e-18	980.261	1.56419	0.264654	5.91403	3.34e-09	8.18e-08	1685.46	1420.85	1828.86	2390.92	2970.89	2908.19	566.62	444.082	433.918	214	434.65	510.154	551.489	408.062	413.621	303.241	1117.37	1167.46	1484.33
AMTN	162.053	-3.9275	0.424254	-9.12452	7.21e-20	2.69e-18	123.973	-3.9166	0.867701	-4.5187	6.22e-06	7.71e-05	0	1.40539	2.32679	31.8647	36.9786	15.83	11.1375	11.8247	28.6549	1032.24	382.817	389.562	4.68356	10.6544	20.1766	21.8436	0	0	0
MAP4K3	2454.99	2.31091	0.253304	9.1229	7.31e-20	2.73e-18	2311.48	0.572314	0.303755	1.88898	0.0588944	0.16347	4350.11	5278.64	3933.44	3353.76	3834.85	3906.61	1016.3	928.894	750.487	266.642	971.718	868.385	2008.07	2170.29	2195.47	1822.02	2779.33	3312.22	3117.66
IKBKE	333.5	-0.855267	0.0938215	-9.11557	7.83e-20	2.91e-18	345.2	0.331004	0.132505	2.49901	0.0124541	0.0496676	210.555	229.078	214.065	257.042	264.733	248.757	388.42	390.214	432.553	428.001	462.128	476.459	285.697	335.612	403.533	337.934	431.923	473.843	385.614
IL10	121.844	-1.5733	0.17258	-9.11304	8.01e-20	2.98e-18	101.829	1.61341	0.438698	3.67842	0.000234686	0.00187053	24.5307	12.6485	16.2875	107.809	100.01	94.9798	57.0796	47.2987	46.3937	352.471	303.506	299.117	57.3736	26.6359	27.7429	12.8492	120.187	87.2868	91.696
COL11A1	347094	1.52009	0.167146	9.09936	9.09e-20	3.37e-18	447552	0.619743	0.163377	3.80613	0.000141157	0.00120852	490744	528686	567130	479063	484647	515135	213751	249489	238577	103062	131467	163372	676809	632927	613485	531991	957046	920874	961418
ACADL	663.583	2.70948	0.299904	9.08903	9.99e-20	3.7e-18	373.458	0.268287	0.199757	1.34344	0.179129	0.360154	1009.85	1214.26	1286.72	1181.12	1008.51	1095.66	179.592	366.565	368.421	76.674	89.9276	85.7154	162.754	175.797	108.449	101.509	169.013	143.4	183.392
FBLIM1	1978.79	-1.18348	0.130286	-9.08507	1.04e-19	3.83e-18	1116.64	-0.886394	0.189528	-4.68393	2.81e-06	3.77e-05	859.596	968.312	1095.92	1682.46	1373.25	1337.63	2575.54	2346.54	2707.21	3338.18	2775.89	2684.96	832.502	562.55	828.503	593.633	371.829	333.56	428.187
CANT1	3887.85	1.24437	0.136974	9.08459	1.04e-19	3.84e-18	2828.83	1.55399	0.12499	12.4334	1.72e-35	7.3e-33	6410.68	5478.2	6875.67	4330.42	4834.11	5014.71	2125.87	1962.9	2379.72	2588.6	2343.74	2309.59	1779.75	1690.85	1363.18	1297.77	4910.77	4476.57	4168.89
PPIF	3277.37	2.56622	0.283387	9.08352	1.05e-19	3.88e-18	2656.96	1.41227	0.163852	8.62257	6.55e-18	5.25e-16	7044.39	5325.02	8478.83	3705.34	4736.62	4460.66	682.171	490.067	642.689	1302.31	1262.11	1198.24	1930.8	2303.47	1350.57	1583.02	5132.37	4724.4	4531.58
CDH2	1455.38	2.28806	0.252108	9.0717	1.17e-19	4.31e-18	531.352	2.05817	0.41073	5.00007	5.73e-07	8.97e-06	3610.1	3291.42	3952.06	1063.22	1353.92	1364.77	509.54	482.184	1054.78	167.081	202.337	413.207	112.405	150.226	200.505	104.079	1100.46	372.528	377.427
GALNT3	424.907	2.6574	0.292412	9.07147	1.17e-19	4.32e-18	113.626	0.415949	0.379223	1.10605	0.268707	0.471198	618.377	862.908	2134.83	183.753	334.488	341.475	187.945	123.502	163.743	45.7755	51.8333	50.2469	55.0318	110.805	105.927	62.9611	185.915	73.2586	82.6901
LTA4H	3210.44	-0.724151	0.0798442	-9.06957	1.19e-19	4.39e-18	2706.56	0.0633432	0.0971181	0.652945	0.513792	0.707631	2707.57	2788.29	2429.17	2111.04	2286.79	2201.5	4239.21	4654.98	4105.84	3916.09	3374.16	3710.59	2649.72	3234.66	2697.36	3110.79	3138.01	3168.82	2865.5
DHRS3	2262.17	1.95026	0.215126	9.06505	1.25e-19	4.56e-18	2228.31	-0.0621939	0.251776	-0.239997	0.810333	0.909232	3244.18	2819.21	3599.55	3172.13	4759.31	4087.52	872.9	798.823	1008.38	1317.19	502.096	964.741	2493.99	2981.09	2614.14	2781.85	2582.15	2818.12	2416.03
USP43	35.497	-3.12012	0.340356	-9.05816	1.33e-19	4.85e-18	31.3914	0.686596	0.458877	1.48843	0.136637	0.299285	4.08845	4.21617	6.98038	10.6216	6.72338	5.65356	45.9421	21.0217	34.113	99.5617	93.0501	93.9913	7.02533	7.45805	10.0883	17.9889	30.0468	10.9108	13.0994
PPIP5K2	6248.21	2.57578	0.284548	9.05149	1.41e-19	5.15e-18	4130.14	0.374349	0.313364	1.19595	0.231718	0.427541	11618.3	18313.6	11188.4	6320.37	7697.43	9855.28	1418.64	1643.63	1833.92	690.066	2238.2	2160.62	3010.36	3280.48	3079.46	3390.9	3603.74	4263.02	4598.72
DNAH9	384.827	-3.94735	0.431143	-9.0509	1.42e-19	5.17e-18	402.732	0.756557	0.382253	1.96648	0.0492433	0.143588	16.3538	12.6485	18.6143	19.1188	24.3723	44.0978	94.6686	65.6926	147.368	1298.88	1243.37	1632.73	16.3924	9.58892	17.6546	21.8436	30.0468	23.3804	29.4737
ECM1	648.601	-1.95648	0.216325	-9.04881	1.45e-19	5.26e-18	446.381	-3.61949	0.499099	-7.22423	5.04e-13	2.27e-11	186.024	137.728	147.751	521.519	284.063	339.214	943.902	641.16	544.444	1740.61	1088.5	1208.29	57.3736	85.2349	268.601	258.269	15.0234	7.79347	11.462
SATB1	2590.78	2.18074	0.241715	9.03622	1.62e-19	5.9e-18	2776.97	0.935928	0.277718	3.38517	0.000711344	0.00478556	5264.9	5667.93	4964.21	3114.78	3104.52	3094.76	1410.28	1810.49	1102.53	249.476	602.016	703.457	3877.98	3193.11	3046.67	2474.76	6653.48	5731.31	5900.47
KANK4	207.543	-3.28338	0.363696	-9.03214	1.68e-19	6.11e-18	243.867	-1.41751	0.463072	-3.14228	0.00167639	0.00980829	30.6633	39.3509	40.7189	29.7404	17.6489	24.8757	151.748	223.355	158.284	434.867	681.327	657.939	16.3924	10.6544	36.5702	15.419	5.63377	4.67608	8.18714
DISP1	1033.22	1.68771	0.186769	9.0319	1.69e-19	6.12e-18	1691.34	-0.248543	0.197677	-1.24691	0.212431	0.404357	1995.16	2011.11	2407.07	951.693	1142.97	1108.1	551.306	513.716	457.115	291.819	502.721	465.819	3284.34	2778.66	3080.72	3277.83	2046.94	2546.9	3242.11
CXCL14	3261.22	5.01784	0.614672	9.0314	1.69e-19	6.14e-18	1823.95	4.30331	0.412509	10.4078	2.28e-25	3.97e-23	4183.5	4587.19	3946.24	3715.43	12965.2	9037.78	192.122	147.151	301.559	27.4653	15.6124	15.3697	48.0064	49.01	31.526	47.542	1327.69	774.67	760.585
PON2	2906.47	1.97473	0.218336	9.03057	1.71e-19	6.17e-18	1113.3	0.1191	0.128933	0.921236	0.356927	0.565329	6716.29	6870.94	8625.42	2273.55	2074.16	2196.97	1002.37	1250.79	1383.62	749.574	831.831	902.08	860.603	684.01	712.488	867.321	976.521	757.525	815.439
SMIM5	1200.6	2.76798	0.307906	9.02639	1.77e-19	6.4e-18	948.024	2.76481	0.397825	6.96935	3.18e-12	1.27e-10	2803.65	2167.11	1766.04	1536.41	2095.17	2154.01	164.278	186.567	180.117	723.253	274.779	355.867	409.811	506.082	167.718	165.755	3096.7	1995.13	1685.73
CHPT1	2567.47	1.11093	0.123324	9.01033	2.05e-19	7.4e-18	1967.47	0.660599	0.118208	5.58697	2.31e-08	4.8e-07	3003.99	3205.69	2512.94	3932.64	4334.06	3913.39	1090.08	1160.13	1278.56	1859.63	2133.91	2384.66	934.369	1012.16	820.937	1026.65	1603.75	1552.46	1355.79
UGP2	12952.9	1.31441	0.145914	9.01009	2.06e-19	7.41e-18	11292	0.579329	0.130266	4.45209	8.5e-06	0.000102276	16383.4	18250.4	18222.3	16125.1	21231.6	20239.7	5337.64	5301.4	7322.02	8176.65	8880.35	9963.67	9943.19	11332	9264.86	10190.7	16086.3	15270.5	14366.8
LMTK3	125.921	-2.44713	0.271303	-9.00838	2.09e-19	7.51e-18	97.6392	-4.52084	0.417081	-10.5198	7e-26	1.33e-23	68.4815	43.567	39.5555	34.5201	15.968	21.4835	295.143	403.353	170.565	173.947	116.781	127.686	188.513	182.19	218.16	223.576	3.75585	10.9108	8.18714
ARHGAP20	145.967	2.51953	0.279468	9.00436	2.17e-19	7.78e-18	171.898	-1.0678	0.340171	-3.14954	0.00163525	0.00962601	356.717	328.861	155.895	194.375	241.201	229.535	37.589	39.4156	42.3002	18.3102	51.8333	55.5672	147.532	127.852	181.59	163.185	39.4364	68.5825	104.795
LBP	52.5043	4.82026	0.522821	9.00308	2.19e-19	7.86e-18	36.3082	0	1.10919	0	1	1	11.2432	18.27	45.3725	136.487	219.35	184.306	0	0	0	5.72194	8.11847	1.18228	0	0	0	0	0	0	0
PDE8B	440.78	2.78603	0.311196	8.99873	2.28e-19	8.17e-18	255.856	0.164123	0.31804	0.507863	0.611549	0.782783	824.844	1176.31	581.698	511.96	779.072	681.819	107.198	273.281	196.491	54.9306	56.8293	44.9267	135.823	83.104	109.71	71.9555	122.065	102.874	112.164
CDKN1C	5617.1	1.78309	0.198422	8.99768	2.31e-19	8.23e-18	5211.57	0.995237	0.273502	3.64848	0.000263792	0.00207328	14755.2	10589.6	10197.2	5614.03	4828.23	5399.15	4132.01	4277.91	3884.79	1512.88	750.022	1464.26	5465.71	6646.19	4332.93	4918.67	15468.5	8541.64	8290.3
PDZRN3	796.742	-1.81378	0.201592	-8.99705	2.32e-19	8.27e-18	1415.45	1.38276	0.217732	6.35515	2.08e-10	6.34e-09	465.061	552.318	283.869	363.258	218.51	212.574	1571.78	1730.34	1248.54	817.093	1032.92	1064.64	1319.59	1214.6	1035.31	1074.19	2557.73	3807.89	2796.73
PSIP1	1278.42	-1.46302	0.162634	-8.99632	2.33e-19	8.31e-18	2520.97	-1.22731	0.216448	-5.66834	1.44e-08	3.1e-07	643.93	601.506	559.594	808.302	863.114	593.624	1775.04	2140.27	1880.31	1346.94	2011.51	2116.87	3752.7	3901.63	4514.52	4543.48	1183.09	2133.85	1995.21
HNRNPA1	25388.7	-0.88315	0.0982298	-8.99078	2.45e-19	8.73e-18	45126.7	-0.108355	0.130723	-0.824301	0.409769	0.615661	23533.1	23204.4	18735.3	13819.7	15334.4	12506.8	39702.4	38428.9	41577	23913.1	25665	28244.7	62288.9	76434.4	70706.5	80337	63184.6	69865.3	68586.9
SLCO4C1	264.994	2.8231	0.313765	8.98967	2.48e-19	8.81e-18	88.0197	1.40832	0.346851	4.05096	5.1e-05	0.000492336	818.711	864.314	317.607	235.268	310.116	295.116	57.0796	39.4156	62.768	45.7755	69.3192	64.4343	16.3924	23.4396	7.56624	12.8492	50.7039	35.8499	39.2983
ADRBK2	157.328	2.32782	0.259047	8.97889	2.74e-19	9.7e-18	114.181	0.97382	0.332134	2.92809	0.00341054	0.0175634	287.213	304.969	305.973	198.092	227.755	265.717	66.8249	34.1602	36.8421	27.4653	53.7068	79.2128	62.0571	67.1225	70.6182	53.9666	178.403	96.639	106.433
LRP5	2450.25	-2.20065	0.24527	-8.97686	2.79e-19	9.86e-18	3097.02	-5.15076	0.287906	-17.8833	1.59e-71	5.85e-68	736.942	623.992	771.332	1360.62	776.551	789.237	5421.17	5695.55	3697.85	3871.46	2499.24	3159.05	5565.23	6197.64	7242.15	6964.26	206.572	187.043	127.719
SHC4	1299.6	-1.76598	0.196708	-8.97335	2.88e-19	1.02e-17	777.504	0.859964	0.269771	3.18492	0.00144792	0.00869778	359.783	497.507	470.012	749.883	721.923	589.101	1236.26	1330.93	1363.16	1645.63	3113.12	3517.88	242.374	228.003	242.12	260.839	585.912	307.062	442.924
COLGALT1	15153.7	0.942332	0.105039	8.97114	2.93e-19	1.04e-17	12646.9	1.94189	0.181479	10.7019	9.97e-27	1.98e-24	19176.9	16544.2	20168.6	18110.8	23074.6	22718.3	10009.8	10107.5	10876.6	9571.66	10362.9	11122.9	6801.69	7598.69	4501.91	4849.29	25229.9	23435	20336.8
HTRA3	1044.72	-2.1571	0.240176	-8.96895	2.99e-19	1.06e-17	1925.59	0.3132	0.220748	1.41912	0.155863	0.327315	239.174	230.484	134.954	614.989	413.488	442.108	573.581	1032.69	665.886	3817.68	2138.28	2233.33	1638.07	1967.86	1718.8	1923.52	2163.37	2377.01	2226.9
BPIFB4	82.3434	4.92207	0.531504	8.95895	3.28e-19	1.15e-17	59.242	-1.97203	0.427113	-4.56658	4.96e-06	6.29e-05	282.103	401.941	74.4574	113.651	39.4999	59.9277	6.96093	1.31385	0	2.28877	1.249	4.72912	133.481	145.965	126.104	123.352	24.413	45.2021	28.655
PLXNB3	868.361	2.53141	0.284162	8.95254	3.47e-19	1.22e-17	476.908	-0.499612	0.263515	-1.90957	0.0561888	0.157861	1696.7	913.502	1306.49	1983.58	1248.87	1578.47	158.709	101.167	111.891	486.365	385.315	449.267	160.412	150.226	194.2	134.917	75.117	158.987	102.339
PODN	254.91	-2.16498	0.241602	-8.95202	3.49e-19	1.23e-17	167.238	-4.02477	0.446091	-8.78166	1.61e-18	1.38e-16	112.432	102.593	75.6208	97.1874	59.67	67.8427	650.151	558.388	519.883	399.391	191.721	224.042	94.842	104.413	150.064	196.593	7.5117	6.23477	7.36843
DNAI1	57.2188	2.76868	0.307412	8.9487	3.6e-19	1.26e-17	33.5183	0.802341	0.578262	1.43207	0.152124	0.322313	178.869	141.944	164.039	29.2093	51.2658	46.3592	6.96093	22.3355	21.8323	9.1551	8.74297	5.91141	98.3547	20.2433	29.0039	19.2738	30.0468	87.2868	111.345
LMCD1	1359.35	-2.10017	0.235471	-8.9429	3.79e-19	1.33e-17	3198.94	0.145463	0.1632	0.902123	0.366992	0.575482	319.921	327.455	237.333	904.427	797.561	712.348	2008.92	2060.12	2172.32	2490.19	1857.88	2423.68	5603.87	6451.21	4781.86	5067.72	5175.56	6657.18	6367.14
SGMS2	10596.3	3.34074	0.376092	8.9416	3.84e-19	1.34e-17	6987.53	2.42492	0.472289	5.1289	2.91e-07	4.81e-06	14415.9	17182.3	18562	14033.8	26963.3	24320.5	1026.04	662.182	1008.38	653.445	4020.51	4307.05	809.084	880.05	1017.66	1084.47	9271.31	3270.14	3816.84
GPR162	282.711	-2.69469	0.301719	-8.93299	4.15e-19	1.45e-17	283.902	0.193682	0.371103	0.503535	0.614588	0.78487	78.7026	43.567	31.4117	129.583	78.9997	79.1498	432.97	504.519	357.505	884.611	488.357	283.156	103.038	138.507	167.718	137.486	176.525	190.161	103.977
TIPARP	5317.87	2.01192	0.225975	8.91811	4.74e-19	1.65e-17	6440.24	0.961023	0.242584	3.96738	7.27e-05	0.00067625	3953.53	4157.14	3920.64	11318.4	13788.8	13251.9	1087.3	567.585	787.329	2011.83	4371.48	4598.48	5153.08	5367.66	3880.22	4086.04	10277.9	8625.81	8305.85
MAPK13	214.083	-1.98353	0.222523	-8.91751	4.77e-19	1.66e-17	165.707	-1.31498	0.266196	-4.94197	7.73e-07	1.18e-05	59.2825	68.864	50.026	147.64	120.18	76.8884	316.026	373.134	249.707	299.829	385.94	421.483	127.627	135.31	155.108	141.341	60.0936	46.7608	58.9474
ZDHHC18	820.444	-0.912367	0.102335	-8.9152	4.87e-19	1.69e-17	942.064	0.0192277	0.091449	0.209831	0.8338	0.921771	575.449	432.86	577.044	569.316	598.381	654.682	916.058	974.879	1027.48	1150.11	1157.82	1211.25	831.331	939.714	948.302	994.528	935.206	897.807	983.275
STMN3	196.969	-2.36266	0.264384	-8.91384	4.93e-19	1.71e-17	492.324	-2.0659	0.326864	-6.31539	2.69e-10	8.05e-09	78.7026	89.9448	40.7189	48.3282	31.9361	37.3135	527.638	587.292	484.405	191.113	116.781	129.46	550.318	712.777	881.467	1020.23	309.858	132.489	114.62
C3orf70	1271.8	1.66097	0.186361	8.90893	5.15e-19	1.79e-17	649.333	-0.488264	0.242205	-2.0098	0.0444523	0.132881	2980.48	3164.93	2448.95	869.376	1218.61	1040.26	722.544	930.208	839.18	224.3	341.6	481.188	836.015	780.964	934.431	857.041	463.847	704.529	646.784
HS3ST2	61.74	3.67594	0.406686	8.90562	5.31e-19	1.84e-17	49.4325	0.477394	0.495866	0.957682	0.338223	0.546381	50.0835	35.1347	61.66	240.048	161.361	149.254	11.1375	3.94156	1.36452	16.0214	4.37148	6.50255	8.19622	14.9161	6.3052	19.2738	9.38962	23.3804	18.0117
MCF2	50.7242	3.93349	0.433727	8.90128	5.52e-19	1.91e-17	23.689	0.344017	0.580415	0.58123	0.561085	0.745027	84.8352	91.3502	226.862	29.7404	71.4359	76.8884	4.17656	6.56926	4.09356	2.28877	7.49397	2.9557	16.3924	18.1124	13.8714	10.2794	24.413	10.9109	21.2866
CHMP4C	290.08	2.08197	0.234037	8.89994	5.59e-19	1.93e-17	134.367	-0.0496711	0.385528	-0.140541	0.888233	0.952061	401.69	385.076	706.182	354.761	509.296	463.592	65.4327	90.6559	90.0584	125.883	141.136	147.194	26.9304	41.552	58.0078	41.1174	76.9949	26.4978	22.1053
GPC3	920.887	2.71274	0.30561	8.89682	5.75e-19	1.98e-17	45937.2	0.874782	0.206305	4.2774	1.89e-05	0.000208012	2902.8	2611.21	1236.69	977.716	889.167	920.399	430.185	616.197	146.004	127.027	98.6706	94.5825	85712.6	95841.3	65446.7	66835.1	156373	145206	134339
RP11-153F1.1	26.676	3.77685	0.410889	8.8935	5.92e-19	2.04e-17	8.72364	1.12865	0.802127	1.40658	0.159552	0.332842	51.1056	67.4586	69.8038	23.8985	52.9466	36.1828	1.39219	3.94156	6.82261	2.28877	2.49799	1.77342	1.17089	2.13087	2.52208	2.56984	3.75585	10.9108	1.63743
RELT	1429.9	1.89136	0.212817	8.88546	6.37e-19	2.19e-17	1445.08	0.187453	0.184899	1.01422	0.310478	0.517761	620.422	465.183	1140.13	3484.94	3820.56	4088.65	258.947	152.407	192.397	918.943	1047.91	968.288	1143.96	718.104	722.576	621.901	1000.93	802.727	938.246
OSBPL5	2544.04	1.24564	0.140249	8.88176	6.58e-19	2.26e-17	1993.87	0.684563	0.181011	3.78015	0.000156733	0.00132036	3584.54	3420.71	3922.97	4057.44	2822.14	3678.21	1912.86	1455.75	1509.16	1663.94	1232.76	1268	1217.72	1407.44	935.692	1236.09	1953.04	1875.11	1969.83
CHRDL1	729.295	-2.56485	0.289076	-8.87922	6.73e-19	2.31e-17	745.175	-3.79487	0.505872	-7.54969	4.36e-14	2.25e-12	163.538	139.133	101.215	208.183	315.999	326.776	747.604	1112.83	1117.54	574.482	1729.23	2215	385.222	454.941	481.717	485.7	63.8494	6.23477	14.7369
CDK2AP1	6066.46	-0.790489	0.0891633	-8.86598	7.58e-19	2.59e-17	6951.49	0.679689	0.119446	5.69102	1.26e-08	2.75e-07	3196.14	3243.64	3160.95	5435.06	6311.57	5417.24	5383.58	5472.2	6241.32	10238.8	8594.96	10102	5418.87	6631.27	4973.54	5759.01	9851.59	9320.98	8241.99
YWHAQ	19066.6	1.45948	0.164627	8.86528	7.63e-19	2.61e-17	16765.7	0.732186	0.189039	3.87794	0.000105344	0.000936835	34327.6	27944.7	29093	20884.7	27185.2	28920.2	9395.86	8889.53	11111.3	7360.7	10885	12801.7	14546	16889.3	13122.4	14078.9	25457.1	25151.1	22727.5
TRPC3	26.4778	4.39836	0.467523	8.86261	7.82e-19	2.67e-17	38.7881	4.62487	0.773296	5.83168	5.49e-09	1.29e-07	31.6855	50.594	63.9868	41.4241	56.3083	63.3199	1.39219	0	4.09356	0	3.74699	1.18228	3.51267	3.19631	1.26104	3.85476	285.445	17.1456	40.117
RIPPLY3	251.672	2.13905	0.241245	8.86074	7.95e-19	2.71e-17	82.6557	-0.267545	0.514402	-0.538697	0.590096	0.76707	542.741	528.426	516.548	202.341	402.562	297.377	86.3155	103.794	90.0584	123.594	73.6907	52.6115	25.7596	20.2433	29.0039	24.4135	13.1455	29.6152	18.0117
NDP	86.3477	-2.93372	0.329483	-8.85915	8.06e-19	2.74e-17	50.7703	-5.9659	0.774896	-6.09969	1.06e-09	2.87e-08	28.6191	22.4862	11.634	7.4351	13.4468	15.83	129.473	302.186	302.924	57.2194	68.0702	76.8483	44.4938	47.9446	104.666	159.33	0	0	0.818714
S100A4	714.821	-2.7045	0.305991	-8.84681	9.01e-19	3.06e-17	615.905	-4.38094	0.514649	-8.45501	2.79e-17	2.07e-15	105.278	50.594	119.83	325.02	290.786	238.58	698.877	486.126	1004.29	3037.2	903.024	1318.24	115.918	233.33	316.521	486.985	16.9013	10.9108	6.54971
LRIG1	2602.53	-2.30948	0.261904	-8.84475	9.17e-19	3.11e-17	3039	-0.103881	0.240402	-0.433759	0.664463	0.819416	535.586	518.588	527.019	1347.88	1179.95	1357.98	4481.45	4836.29	4317.34	2555.42	5100.9	4471.98	2412.03	2692.36	3495.6	3631.18	3282.61	2464.29	2781.17
WSCD2	4017.96	3.0037	0.343166	8.84448	9.2e-19	3.11e-17	5580.64	0.140795	0.28143	0.52783	0.597617	0.772279	7292.76	6707.92	5130.58	6484.47	8520.21	8320.91	1543.93	1568.74	1427.29	252.91	374.699	591.141	9490.05	9950.1	8194.24	7582.31	8458.17	11252.2	9609.25
FRRS1	147.723	1.84378	0.208435	8.84152	9.44e-19	3.19e-17	207.313	-0.171907	0.343529	-0.482003	0.629804	0.796001	237.13	304.969	241.986	205.528	204.223	196.744	57.0796	80.145	68.2261	91.551	43.7148	41.3798	347.754	344.136	375.79	355.923	249.764	420.847	279.182
ROBO1	2746.33	1.92256	0.217502	8.84027	9.55e-19	3.22e-17	2829.12	0.0160861	0.257354	0.0623442	0.950289	0.987698	4573.95	4032.06	3954.38	3530.08	5304.75	4775	1655.31	1270.5	829.629	651.157	1301.45	1077.65	2383.93	2802.1	3470.38	2090.56	2788.72	2843.06	2520.82
FDCSP	46.7448	6.70552	0.705834	8.83932	9.63e-19	3.25e-17	20.8934	1.21695	1.12958	1.04843	0.29444	0.499695	25.5528	36.5401	162.875	43.0174	176.489	116.463	0	0	0	0	0	0	0	0	0	0	0	0	1.63743
AHRR	229.868	1.88854	0.213567	8.83825	9.72e-19	3.27e-17	311.097	0.919399	0.227866	4.04635	5.2e-05	0.000501044	337.297	292.321	194.287	526.83	376.509	463.592	116.944	76.2035	91.4229	104.139	94.9236	83.942	478.894	271.686	293.822	247.989	717.367	579.834	553.451
CHST8	27.7748	5.03328	0.509542	8.83831	9.72e-19	3.27e-17	24.8062	1.06094	0.515275	2.07144	0.0383176	0.118628	50.0835	39.3509	72.1306	37.7066	69.7551	57.6663	0	0	1.36452	3.43316	0.624498	1.18228	16.3924	19.1778	18.9156	8.99444	60.0936	26.4978	19.6491
TRIM3	663.012	-1.22417	0.138695	-8.82743	1.07e-18	3.6e-17	909.378	-0.263355	0.219522	-1.19339	0.232717	0.429005	300.501	309.185	362.98	528.954	390.797	505.428	966.177	873.712	809.161	933.82	1081.63	893.805	1813.71	1116.58	1240.86	1335.03	801.874	1323.33	1308.3
RP11-30K9.5	33.2467	5.39801	0.52071	8.82436	1.1e-18	3.69e-17	8.68537	1.3061	0.796472	1.63872	0.101272	0.242679	111.41	71.6748	110.523	27.6161	39.4999	33.9214	0	0	1.36452	1.14439	0.624498	1.18228	4.68356	5.32718	0	0	13.1455	4.67608	4.91228
SDC4	18168.4	1.87475	0.213208	8.82278	1.12e-18	3.74e-17	14163	0.898949	0.168508	5.33675	9.46e-08	1.75e-06	14029.5	12196	20423.4	32154.2	44894.5	41056.1	3221.52	2567.27	2955.55	13652.5	15137.8	15732.6	4250.33	4913.79	4660.8	5243.76	11303.2	8095.85	7366.79
MUM1L1	768.511	2.65597	0.301445	8.81909	1.15e-18	3.86e-17	395.414	-0.255545	0.38852	-0.673979	0.500324	0.69578	1270.48	1186.15	1693.9	861.941	1512.76	1457.49	279.829	244.377	274.269	50.3531	151.753	238.821	149.874	182.19	171.501	158.045	174.647	130.93	108.07
SLC12A8	233.984	1.30572	0.148055	8.81686	1.18e-18	3.93e-17	408.864	0.443243	0.186262	2.3932	0.0167021	0.0624939	444.618	386.482	408.352	261.291	246.244	262.325	175.415	122.188	163.743	136.182	88.0542	112.908	762.249	745.805	539.725	565.365	756.803	1053.68	864.562
COL14A1	6605.14	-2.02064	0.228215	-8.81575	1.19e-18	3.96e-17	23494.2	-1.64459	0.18726	-8.77095	1.77e-18	1.5e-16	3249.29	2911.96	3758.93	836.449	716.881	783.583	18282.2	25199.7	16980.1	1604.43	2230.7	2707.42	48410.4	47767.8	56488.3	50938.1	17827.1	14834.1	15910.9
NOTUM	600.48	2.94635	0.335303	8.81012	1.25e-18	4.16e-17	931.386	3.14291	0.253785	12.3961	2.75e-35	1.14e-32	667.439	607.128	544.469	1765.31	1419.47	1485.76	143.395	195.764	107.797	123.594	70.5682	75.0748	323.165	361.183	206.811	305.811	3731.43	2281.93	2142.57
GPR89A	2543.19	2.67845	0.304642	8.80741	1.28e-18	4.26e-17	1145.34	0.113674	0.207469	0.549141	0.582909	0.761723	4737.49	5319.39	8340.39	1899.14	3306.22	3198.78	392.596	505.833	570.37	672.9	859.309	715.871	939.053	1067.57	920.559	830.058	878.869	1095.76	1074.97
USP3-AS1	82.718	2.16073	0.245088	8.80286	1.33e-18	4.43e-17	47.873	1.30336	0.461747	2.82641	0.00470727	0.0229138	160.471	155.998	196.614	86.5658	117.659	106.287	18.0984	28.9048	28.6549	28.6097	28.1024	36.6507	23.4178	22.3742	12.6104	37.2627	82.6287	79.4933	24.5614
ASAH1	3752.47	0.896022	0.101793	8.80246	1.34e-18	4.44e-17	2743.67	1.20525	0.179748	6.70047	2.08e-11	7.39e-10	3958.64	4203.52	5003.77	5944.9	4971.94	5217.1	2072.96	2376.76	2518.91	2749.96	2897.67	3113.54	968.325	1152.8	752.841	1007.38	2918.29	1974.86	1857.66
PLEKHS1	42.0598	3.0992	0.350341	8.80006	1.37e-18	4.53e-17	13.4975	-0.464659	1.0168	-0.613548	0.539514	0.728064	91.99	88.5395	75.6208	59.4808	68.0742	64.4506	19.4906	9.19697	17.7388	3.43316	3.74699	2.9557	2.34178	0	0	1.28492	0	0	0.818714
IRF2BPL	1539.55	-1.71536	0.195621	-8.77956	1.64e-18	5.43e-17	2466.11	0.372059	0.229265	1.62633	0.10388	0.247101	417.021	408.968	517.711	1211.39	900.093	1065.13	1967.16	2064.06	2078.17	2004.97	2612.9	3227.04	2662.6	2940.6	2498.12	2393.8	4105.14	3252.99	2863.86
GLIPR2	327.197	-1.98167	0.225738	-8.77862	1.65e-18	5.47e-17	557.301	-4.05615	0.497504	-8.11747	4.76e-16	3.08e-14	129.808	106.81	100.052	149.233	157.159	135.685	435.754	574.154	668.615	676.333	288.518	504.243	101.867	171.535	308.955	371.342	24.413	0	11.462
GSR	2932.72	1.40421	0.159989	8.77836	1.66e-18	5.47e-17	1684.91	-0.0338555	0.153257	-0.226903	0.820499	0.914496	4262.2	3912.6	5351.62	3567.26	4153.37	4298.97	1435.34	1211.37	1468.22	1581.54	1774.2	2175.99	804.401	761.787	809.588	844.192	933.328	684.266	744.211
PPP4R4	127.499	3.77136	0.421075	8.77103	1.77e-18	5.83e-17	131.166	-3.04105	0.743032	-4.10666	4.01e-05	0.000400252	20.4422	14.0539	25.5947	282.003	703.434	419.494	2.78437	1.31385	5.45808	16.0214	18.1104	21.2811	39.8102	51.1409	158.891	141.341	9.38962	12.4695	4.91228
OR2W3	30.1225	3.90864	0.431889	8.7685	1.81e-18	5.96e-17	17.2767	1.70941	0.72055	2.3631	0.0181227	0.0664471	71.5478	35.1347	98.8887	28.6782	57.1487	52.0127	2.78437	2.62771	5.45808	1.14439	2.49799	3.54684	0	8.52349	2.52208	10.2794	37.5585	9.35216	13.9181
LAG3	180.548	-3.19274	0.364243	-8.76661	1.84e-18	6.05e-17	398.775	-0.824762	0.387794	-2.11281	0.0346173	0.109604	7.15478	1.40539	6.98038	66.9159	60.5104	73.4963	91.8843	48.6126	90.0584	1053.98	386.564	279.018	638.134	580.662	696.094	824.918	503.284	255.626	388.07
NRP2	3005.94	-2.0249	0.231258	-8.76507	1.87e-18	6.12e-17	2665.6	1.37263	0.282244	4.84923	1.24e-06	1.8e-05	731.832	777.18	792.273	1319.2	1899.36	1774.09	5515.84	3220.25	3262.57	3279.81	6312.42	7186.5	865.287	665.897	824.72	641.175	2745.53	1644.42	1498.25
RBPMS-AS1	50.3911	2.17994	0.248076	8.76383	1.89e-18	6.18e-17	26.0048	0.820245	0.547803	1.48631	0.137198	0.300216	78.7026	82.9179	51.1894	81.255	105.053	99.5026	9.7453	15.7662	24.5614	17.1658	18.7349	20.0988	3.51267	7.45805	6.3052	0	9.38962	3.11739	10.6433
B4GALNT4	569.025	-2.2758	0.2596	-8.76213	1.92e-18	6.27e-17	2305.97	0.343076	0.223088	1.55481	0.11999	0.27353	273.926	251.565	118.666	179.505	115.978	169.607	1568.99	1351.95	717.738	883.467	517.084	679.812	4374.44	4551.54	3230.78	3696.71	4602.79	5595.71	4955.68
TCEAL7	120.689	-1.89155	0.215971	-8.75565	2.03e-18	6.62e-17	344.314	-2.56691	0.259191	-9.89969	4.18e-23	5.72e-21	39.8623	40.7563	39.5555	71.1646	64.7125	46.3592	190.73	222.041	169.201	216.289	133.018	214.584	399.273	478.381	485.5	592.348	108.92	82.6107	55.6726
CACNB1	1136.7	-2.03367	0.232349	-8.75133	2.11e-18	6.87e-17	1094.17	-1.75366	0.214886	-8.15589	3.47e-16	2.26e-14	513.1	375.239	321.097	508.773	312.637	506.559	2867.9	2504.2	1716.57	1487.7	1319.56	1207.11	1913.23	2155.38	2138.72	2175.37	430.045	643.74	766.316
DBN1	2506.35	-1.16052	0.132628	-8.74977	2.14e-18	6.96e-17	3069.66	0.378278	0.128071	2.95031	0.00317457	0.0165453	1749.85	1311.23	1643.88	1669.18	1458.13	1374.95	3121.28	2877.34	3000.58	4114.07	4226.6	3529.11	2054.91	2286.43	1955.87	2224.2	3032.85	2613.93	2669.01
PIANP	169.369	-2.70295	0.308143	-8.745	2.23e-18	7.25e-17	225.265	-3.7561	0.283413	-13.1769	1.19e-39	6.57e-37	65.4151	42.1616	29.0849	37.7066	24.3723	26.0064	510.932	626.708	252.436	169.369	109.912	138.327	341.899	413.389	498.111	467.711	26.2909	28.0565	35.2047
SLC6A8	8208.34	1.45223	0.166176	8.74086	2.31e-18	7.51e-17	5096.77	1.22353	0.221278	5.52927	3.22e-08	6.46e-07	9236.82	8086.6	6795.4	15946.7	15709.2	16191.8	3746.37	2364.94	2166.86	4907.13	6103.84	7244.43	2196.59	2115.95	1445.15	1282.35	4467.58	3973.11	3983.86
SNTA1	2063.31	1.6556	0.189534	8.73898	2.35e-18	7.62e-17	1342.27	1.35351	0.233068	5.80331	6.5e-09	1.51e-07	2899.73	2119.33	2875.92	3345.26	3865.94	3601.32	728.113	717.364	679.531	1906.55	942.367	1078.24	372.343	430.436	278.69	371.342	1134.27	866.633	812.164
SERTAD4-AS1	224.443	-3.40411	0.392508	-8.73414	2.46e-18	7.95e-17	224.639	-1.45765	0.354081	-4.11224	3.92e-05	0.00039231	15.3317	9.83772	27.9215	73.8199	47.9041	46.3592	392.596	621.452	416.179	579.06	232.313	230.545	241.203	332.416	385.878	457.431	153.99	124.695	101.52
GBX2	52.9272	5.09864	0.553298	8.73383	2.46e-18	7.96e-17	29.7755	2.81336	0.538037	5.18749	2.13e-07	3.63e-06	128.786	118.053	178	41.9552	88.2444	71.2348	0	0	0	3.43316	1.87349	3.54684	8.19622	10.6544	2.52208	2.56984	73.239	32.7326	38.4796
HSPB3	44.7687	5.02637	0.538073	8.72472	2.67e-18	8.61e-17	33.2069	0.39577	1.03192	0.257644	0.796682	0.902577	41.9066	44.9724	51.1894	126.928	138.67	123.248	0	5.25541	2.72904	1.14439	0	1.18228	0	0	1.26104	0	0	1.55869	0
CHN1	263.672	1.94657	0.22309	8.72374	2.69e-18	8.68e-17	243.569	0.574985	0.201513	2.84975	0.0043753	0.021579	336.275	295.132	432.783	562.412	474.839	424.017	97.453	84.0866	170.565	91.551	86.1807	108.77	162.754	145.965	141.237	158.045	307.979	168.339	209.591
ERG	3618.45	-2.34259	0.268692	-8.70942	3.05e-18	9.83e-17	1931.05	-0.711616	0.256937	-2.76939	0.00561614	0.0264615	1682.39	1590.9	547.96	858.223	876.561	880.824	9015.8	8872.45	8592.39	2293.35	4043.62	4166.95	1491.71	1615.2	2471.64	2607.1	1556.8	1056.79	1115.91
NT5E	4083.1	-2.13343	0.245001	-8.70813	3.09e-18	9.93e-17	4122.76	2.93411	0.246409	11.9057	1.1e-32	3.81e-30	486.525	534.048	927.227	2424.37	2290.99	2225.24	4214.15	2116.62	2532.55	5933.65	13054.5	12257.3	831.331	856.61	611.604	630.895	7286.35	5070.43	4818.13
STEAP3	7075.36	-2.25527	0.25951	-8.70447	3.19e-18	1.02e-16	4244.49	0.459236	0.326325	1.377	0.168511	0.345517	1736.57	1269.07	1390.26	4251.29	2975.94	3541.39	11538.4	7800.34	8652.43	6357.07	15714.2	19677.3	108.893	98.0201	129.887	132.347	204.694	123.137	156.374
DGKI	866.466	-2.06018	0.237464	-8.70285	3.24e-18	1.04e-16	400.089	-0.864271	0.267988	-3.24781	0.00116299	0.00721827	44.9729	82.9179	53.5162	824.765	592.498	594.754	370.321	222.041	364.327	3221.45	1622.44	2403.58	93.6711	92.6929	103.405	119.498	56.3377	56.1129	54.0351
H2AFZ	3503.91	-1.09059	0.125338	-8.69962	3.33e-18	1.06e-16	6525.99	-0.188279	0.137149	-1.37097	0.170385	0.348	1675.24	1527.66	1540.34	2619.28	2907.86	2914.97	3531.98	3080.99	2776.8	7960.36	5438.12	6073.38	7492.52	9229.87	8338	9737.12	7091.04	8000.77	7804.8
PLEKHG6	170.695	2.81322	0.321074	8.70054	3.3e-18	1.06e-16	113.829	-0.97635	0.39607	-2.47473	0.0133338	0.0523272	71.5478	44.9724	100.052	469.474	595.86	577.794	19.4906	18.3939	15.0097	37.7648	63.6987	34.2862	25.7596	22.3742	35.3091	23.1286	9.38962	9.35216	18.0117
FAM13A	3286.34	1.76676	0.203103	8.69936	3.34e-18	1.07e-16	2161.21	-0.0443654	0.250411	-0.176147	0.860179	0.937593	4968.48	6192.14	6366.1	3590.62	4877.81	4565.81	1876.67	1730.34	1644.25	650.012	1313.94	1659.92	2237.57	1957.2	2215.65	1827.15	1902.34	1968.63	2118.01
SIK3	2488.07	0.82154	0.0945553	8.68842	3.68e-18	1.17e-16	3096.24	0.37951	0.132104	2.87792	0.00400305	0.0200845	3165.48	3374.34	3105.1	2966.61	3253.28	3220.27	1702.64	1940.56	1683.82	1596.42	2080.2	1768.1	4191.78	3459.47	4505.7	3591.35	4540.82	5034.58	5798.95
SFRP1	1319.75	-2.00073	0.230339	-8.6831	3.85e-18	1.23e-16	2086.3	-0.696556	0.273124	-2.5377	0.0111583	0.0454873	612.245	609.938	382.757	443.982	463.073	513.343	1779.21	3417.33	2840.93	1002.48	1897.22	1874.51	4363.9	4450.33	3767.99	3695.43	1320.18	3231.17	2947.37
HIST1H2BC	58.5583	1.89479	0.217869	8.68268	3.87e-18	1.23e-16	141.688	-0.127649	0.196301	-0.633045	0.526704	0.717881	89.9458	84.3233	82.6011	81.7861	113.457	105.156	25.0593	22.3355	28.6549	14.877	24.3554	30.1482	293.893	313.238	266.079	226.146	283.567	238.48	237.427
DCAF15	607.259	-1.07485	0.123842	-8.67871	4e-18	1.27e-16	734.594	-0.282668	0.086089	-3.28332	0.00102592	0.00647505	374.093	267.024	432.783	426.987	406.765	425.148	772.663	721.305	694.541	978.451	880.542	906.81	826.648	881.115	838.592	867.321	672.297	732.586	698.363
MATN3	72935.1	2.40473	0.277882	8.67846	4.01e-18	1.27e-16	62964.9	0.944154	0.233593	4.06704	4.76e-05	0.00046263	131122	130270	79332	114605	138641	139221	28758.4	39348.6	29919.9	9349.65	13684.6	20968.9	45753.7	52064.7	51233.5	53717.3	116767	90413.5	88495.6
SLC41A3	2690.35	-1.07681	0.124107	-8.67591	4.1e-18	1.3e-16	1906.09	-0.1848	0.131646	-1.4075	0.159278	0.332491	1550.54	1568.41	1650.86	1707.42	1782.54	2047.72	2497.58	3069.16	3847.95	4023.67	4081.72	4456.61	913.293	1124.04	1105.93	1251.51	1030.98	936.774	932.515
H2AFV	2681.75	-0.83325	0.0960357	-8.676	4.1e-18	1.3e-16	3040.52	-0.198233	0.111645	-1.77526	0.0758547	0.196856	1977.79	1783.44	1614.79	2091.39	1997.68	2025.1	2862.33	2891.79	3033.33	4316.63	3619.59	3967.14	3279.66	3603.3	3262.31	3732.69	2493.88	3256.11	3307.6
FKBP5	35630.1	1.49159	0.172122	8.67006	4.32e-18	1.36e-16	12870	0.131612	0.180757	0.715333	0.474403	0.674379	59931.5	57459.3	59425.1	38324.8	48744.5	49345.4	22417	23097.5	28495.3	9229.48	14640.1	16451.4	1285.64	1141.08	1203.03	1245.09	1346.47	1278.13	1375.44
CRHBP	197.524	2.22675	0.257484	8.66376	4.56e-18	1.44e-16	68.1311	0.648241	0.900082	0.626326	0.531101	0.721243	402.712	392.103	300.156	223.053	252.967	356.174	83.5311	126.13	115.984	51.4974	39.9678	26.0102	0	9.58892	7.56624	0	22.5351	0	0
SPAG5	961.109	-1.27869	0.147682	-8.65965	4.73e-18	1.49e-16	1543.53	-0.517035	0.184394	-2.80261	0.00506909	0.0243737	376.137	317.618	337.385	848.133	707.636	801.675	1190.32	762.035	698.635	1907.69	1807.3	1778.74	2167.32	1885.82	2189.17	2099.56	922.061	1594.54	1835.56
DNM1	2372.08	-2.03729	0.235285	-8.65733	4.83e-18	1.52e-16	2088.32	-0.466948	0.182247	-2.56102	0.0104366	0.0432257	1089.57	1169.28	474.666	1006.39	800.082	827.681	5780.36	4707.53	3352.63	3713.54	2846.46	2696.78	2485.8	2368.46	2616.66	2447.77	1318.3	1900.05	2145.85
KRT86	20.7845	4.38909	0.471974	8.65662	4.86e-18	1.53e-16	15.3879	0.10523	0.62004	0.175905	0.860369	0.937648	24.5307	18.2701	27.9215	52.0457	61.3509	56.5356	1.39219	0	1.36452	2.28877	3.12249	0.59114	11.7089	7.45805	5.04416	6.4246	0	14.0282	9.82457
ID3	5732.97	2.13157	0.246764	8.65521	4.92e-18	1.54e-16	5903.44	0.547369	0.214207	2.55449	0.0106344	0.0438956	9923.68	7292.56	10745.1	8925.84	9471.56	9240.18	1234.87	1228.45	1683.82	4277.72	2073.33	2698.56	4057.13	5578.62	4076.94	5532.86	7675.08	6894.1	6589.83
RABL2B	1401.31	-0.63004	0.0728914	-8.64373	5.44e-18	1.71e-16	926.182	0.44712	0.10833	4.12573	3.7e-05	0.000372869	1307.28	1187.55	1252.98	970.281	921.944	979.196	1956.02	1807.86	1775.24	1522.04	1581.85	1553.52	551.489	703.188	643.13	605.197	974.643	832.342	767.954
CYP2J2	39.1947	2.96322	0.340707	8.63402	5.92e-18	1.85e-16	31.9307	0.943894	0.351266	2.69056	0.00713329	0.0319765	75.6362	59.0263	97.7253	64.7916	69.7551	54.2742	4.17656	5.25541	6.82261	16.0214	5.62048	11.2317	29.2722	24.505	15.1325	25.6984	56.3377	37.4086	45.848
ADAM12	3129.81	-2.68451	0.311336	-8.62849	6.22e-18	1.94e-16	1861.71	1.42836	0.355012	4.00493	6.2e-05	0.000585205	610.2	715.343	693.384	812.551	963.965	992.765	7672.34	4480.24	6403.7	1440.78	5760.36	7012.11	400.444	430.436	451.452	386.761	1153.05	1028.74	1248.54
GRIN3A	146.905	3.52392	0.405829	8.62726	6.28e-18	1.96e-16	28.3826	-0.513926	0.690391	-0.870844	0.383839	0.591357	488.569	448.319	487.463	39.2998	98.3295	113.071	19.4906	9.19697	17.7388	9.1551	16.8614	15.3697	5.85444	2.13087	3.78312	11.5643	9.38962	0	2.45614
RPS6KA6	540.51	2.65271	0.307668	8.62202	6.58e-18	2.05e-16	350.725	0.417809	0.36789	1.13976	0.254386	0.455073	940.342	1080.74	1138.96	664.379	929.508	894.393	112.767	147.152	113.255	42.3423	202.962	219.313	271.646	267.424	269.863	262.124	345.538	417.73	319.298
RP11-396F22.1	73.9662	2.1977	0.254559	8.61702	6.87e-18	2.14e-16	64.9609	0.0740805	0.305891	0.254926	0.79878	0.90298	86.8795	73.0802	87.2547	131.708	199.18	154.907	20.8828	22.3355	15.0097	48.0643	18.7349	29.557	60.8862	71.3842	50.4416	68.1007	60.0936	82.6107	57.31
WDR62	281.45	-1.13422	0.13163	-8.61531	6.98e-18	2.17e-16	465.758	-0.525009	0.22955	-2.28454	0.0223401	0.0780645	163.538	130.701	188.47	208.183	173.127	182.045	343.87	304.814	307.017	442.878	485.859	446.902	710.729	616.887	655.741	638.605	236.618	551.777	566.55
PRMT2	3791.7	-0.622661	0.0722888	-8.61352	7.08e-18	2.2e-16	3115.5	0.17939	0.0867204	2.06778	0.038661	0.119356	2859.87	2746.13	3108.59	3004.84	3059.98	3115.11	4783.55	4790.31	4823.58	4468.83	4285.3	4454.24	2568.93	2810.62	2433.81	2409.22	3096.7	2988.01	2616.61
SF3A2	1620.69	-0.741669	0.0862615	-8.59788	8.12e-18	2.52e-16	1903.54	-0.165549	0.13466	-1.22892	0.219103	0.412251	1322.61	1127.12	1216.91	1179.53	1149.7	1275.44	2260.91	1931.36	1943.08	2089.65	1884.73	2067.22	2016.27	2373.79	2071.89	2315.42	1812.2	1954.6	2095.91
TPBG	2087.51	-1.79104	0.208283	-8.59543	8.3e-18	2.57e-16	2853.4	1.03983	0.139203	7.47116	7.95e-14	3.97e-12	656.196	522.804	1183.17	1099.33	907.657	998.419	2581.11	1955.01	2337.42	3898.93	3981.17	4928.93	2116.97	2348.22	1958.39	2179.22	4024.39	4746.22	4527.49
C1orf95	537.28	3.92894	0.498426	8.59436	8.37e-18	2.59e-16	135.173	-1.34923	0.411747	-3.2943	0.000986678	0.00624947	1384.96	966.907	2296.54	283.065	327.765	575.532	254.77	202.333	146.004	3.43316	2.49799	3.54684	36.2976	50.0755	74.4014	73.2404	31.9247	21.8217	14.7369
TMEM37	32.2175	3.13495	0.360714	8.59011	8.69e-18	2.69e-16	31.6947	-0.969708	0.404305	-2.38303	0.0171708	0.0637823	70.5257	63.2425	36.0653	64.2605	60.5104	53.1435	8.35312	6.56926	8.18713	10.2995	2.49799	2.9557	40.9811	49.01	51.7026	34.6928	30.0468	10.9108	25.3801
MOB3B	269.159	2.37918	0.278348	8.5877	8.87e-18	2.74e-16	220.63	1.93068	0.250037	7.71629	1.2e-14	6.6e-13	413.955	511.561	577.045	360.071	380.711	401.403	118.336	199.706	148.733	30.8985	44.3393	43.1533	72.5951	87.3657	65.5741	83.5198	448.824	222.893	232.515
CAB39	7937.13	2.18507	0.255261	8.58376	9.18e-18	2.83e-16	5880.47	1.13411	0.183029	6.20024	5.64e-10	1.6e-08	13285.4	14641.3	14426.1	9441.52	13457.7	12249	1776.43	1686.99	1914.42	3006.31	4564.45	4795.92	4209.35	3970.88	3382.11	3430.74	8689.16	8113	8007.84
MYOCD	95.7816	4.68556	0.539176	8.58237	9.29e-18	2.86e-16	42.3716	1.22097	0.991293	1.22371	0.22106	0.414872	219.754	320.428	150.078	276.161	86.5635	64.4506	2.78437	19.7078	1.36452	5.72194	0	2.36456	0	3.19631	0	1.28492	0	4.67608	5.731
IGHEP2	31.8527	2.80424	0.324428	8.58057	9.44e-18	2.9e-16	38.3467	0.146107	0.412858	0.371742	0.710085	0.850697	48.0392	33.7293	44.2091	72.7578	63.0317	74.627	4.17656	2.62771	2.72904	13.7326	13.1144	9.45825	60.8862	37.2903	37.8312	51.3968	15.0234	60.789	76.9591
NMNAT1P3	23.5728	4.35478	0.474409	8.58042	9.45e-18	2.9e-16	9.19883	0.320774	1.12839	0.227177	0.820286	0.914496	33.7297	59.0263	45.3725	38.2377	52.1062	42.9671	5.56874	2.62771	1.36452	0	1.87349	0	0	1.06544	0	0	0	0	0.818714
PCDHGA4	59.8254	3.18658	0.369761	8.57274	1.01e-17	3.1e-16	71.6518	-0.779701	0.496323	-1.56735	0.117033	0.268761	91.99	105.404	176.836	80.1929	84.8827	111.941	4.17656	28.9048	13.6452	2.28877	9.36746	8.27597	90.1584	66.057	71.8793	128.492	9.38962	81.052	59.7661
TSPAN14	3796	2.26043	0.263956	8.56027	1.13e-17	3.45e-16	1627.09	-0.0758095	0.234804	-0.33358	0.738697	0.869199	7194.64	6027.71	12902.1	3430.24	4481.13	4331.76	1130.45	1275.75	1180.31	755.296	1479.43	1363.17	618.229	874.723	793.194	860.896	837.554	762.201	637.778
MYBPC1	262.948	3.16475	0.371252	8.55793	1.15e-17	3.52e-16	125.006	0.409379	0.949511	0.252137	0.800935	0.903932	549.896	869.935	152.405	560.819	312.637	390.096	61.2562	89.342	90.0584	22.8878	19.9839	36.0596	0	0	1.26104	0	0	0	0.818714
TPR	4954.89	-0.528764	0.0618317	-8.55162	1.21e-17	3.71e-16	5866.9	-0.580433	0.159394	-3.64138	0.000271183	0.00212154	3740.93	3661.04	3899.7	4566.75	4405.5	4042.29	5215.13	5332.93	5518.12	6294.13	6506.02	6276.14	7388.31	7139.48	8210.63	6688.01	3432.85	5277.73	6010.18
SLC25A13	1238.42	1.48677	0.17394	8.54978	1.23e-17	3.76e-16	1042.81	1.44229	0.173099	8.33204	7.95e-17	5.56e-15	1923.61	1838.25	2188.35	1544.91	1642.19	1822.71	474.735	495.323	645.418	638.568	886.162	760.798	670.919	697.86	482.978	542.236	1928.63	1434	1549.83
STARD7	3258.94	0.96807	0.113345	8.54084	1.33e-17	4.06e-16	2605.96	0.36739	0.117236	3.13249	0.00173328	0.010085	4151.82	4009.57	5348.13	4019.73	4316.41	4069.43	2067.4	2472.67	2130.02	1880.23	2329.38	2312.54	1837.12	2039.24	1853.73	2068.72	2452.57	2603.02	2493.8
EML3	3228.26	-1.45619	0.170596	-8.53588	1.39e-17	4.23e-16	2656.73	-1.05103	0.233293	-4.50722	6.57e-06	8.09e-05	1829.58	1558.58	1520.56	2088.73	1515.28	1760.52	4562.19	4919.06	4350.09	6734.72	4555.71	3344.08	2438.96	3160.08	3059.28	3601.63	1577.46	1465.17	1363.98
EMB	219.619	-2.76753	0.32422	-8.53384	1.42e-17	4.3e-16	185.852	-0.633509	0.344208	-1.84035	0.0657169	0.177179	39.8623	44.9724	127.974	38.2377	46.2233	27.1371	587.502	345.543	451.656	153.348	349.719	423.257	190.855	171.535	205.549	235.14	197.182	96.639	94.1521
PIM3	5286.91	1.40029	0.164323	8.53307	1.43e-17	4.33e-16	4938.14	0.590374	0.136247	4.33519	1.46e-05	0.000165328	5592.99	4159.95	4577.96	10105.4	9622.84	10689.8	1513.31	1425.53	1286.74	5744.82	4043.62	4680.06	3387.38	3600.11	2655.75	3117.22	4811.24	5068.87	4556.14
SLC43A2	371.223	2.13069	0.250554	8.52738	1.5e-17	4.54e-16	299.567	1.29812	0.26349	4.92287	8.53e-07	1.28e-05	496.746	442.697	616.6	579.407	706.795	724.786	58.4718	73.5758	87.3293	273.509	241.056	153.696	165.095	124.656	74.4014	82.2348	287.322	271.213	275.907
KIAA1755	1168.14	-2.56512	0.301271	-8.51747	1.63e-17	4.94e-16	634.452	-4.03541	0.415263	-9.66217	4.37e-22	5.32e-20	423.154	296.537	117.503	361.665	294.988	434.193	3142.16	2447.71	1181.67	1715.44	1907.22	1695.39	170.95	175.797	389.661	435.588	33.8026	6.23477	9.82457
HRASLS	74.9184	1.76978	0.207609	8.51647	1.64e-17	4.98e-16	144.967	1.25494	0.269161	4.67862	2.89e-06	3.86e-05	108.344	113.836	94.2351	129.583	125.223	123.248	37.589	26.2771	40.9356	46.9199	26.2289	26.6013	151.045	197.106	121.06	167.04	409.387	406.819	341.404
PLEKHG5	1553.93	-2.20695	0.25957	-8.5059	1.8e-17	5.44e-16	1274.89	-1.26777	0.173394	-7.31409	2.59e-13	1.22e-11	514.122	448.319	362.98	718.018	495.849	550.657	3912.04	3854.84	2592.59	1406.45	1976.54	1814.8	1340.67	1456.45	1593.95	1699.95	593.424	676.473	617.31
PRSS16	36.6302	2.8098	0.32823	8.5028	1.85e-17	5.59e-16	17.7651	0.256877	0.830616	0.314699	0.752991	0.877317	87.9016	53.4048	81.4377	42.4863	62.1913	57.6663	5.56874	17.0801	16.3743	4.57755	4.37148	6.50255	4.68356	1.06544	2.52208	20.5587	0	23.3804	3.27486
CHCHD4	377.398	1.11356	0.130961	8.50242	1.86e-17	5.6e-16	278.113	0.181019	0.279501	0.638784	0.522963	0.714827	418.043	444.103	475.829	455.135	626.115	686.342	213.004	203.647	225.146	272.364	244.803	264.24	129.969	169.404	136.192	208.157	259.154	160.545	132.632
KIAA1462	1474.72	-1.68665	0.198412	-8.49733	1.94e-17	5.84e-16	1528.84	-0.0369638	0.32878	-0.110253	0.912209	0.966298	790.092	698.478	636.378	704.21	571.487	603.8	3183.93	2145.52	3551.85	1485.41	1267.11	2058.35	2375.73	1739.86	1778.07	1318.33	721.123	2392.59	2154.86
NFE2L1	24193.6	0.882641	0.103949	8.491	2.05e-17	6.16e-16	14891.3	0.515413	0.124732	4.12881	3.65e-05	0.000368493	31033.3	27919.4	29556.1	30533.8	34969.1	34468.6	17165.7	15319.5	17113.8	14215.6	18928.5	19099.8	6642.45	6704.79	6621.72	6105.94	9378.35	9663.9	8933.81
C12orf49	2293.76	1.74601	0.206133	8.48563	2.15e-17	6.44e-16	1412.76	0.476836	0.17626	2.69929	0.0069487	0.0313291	3588.63	3018.77	3067.88	3213.03	4310.53	3637.5	527.638	696.342	702.728	1652.5	1574.36	1535.19	426.204	505.017	466.585	530.672	794.362	757.525	474.035
C11orf95	2850.23	-0.684532	0.0807006	-8.48263	2.2e-17	6.6e-16	3426.05	-0.824518	0.114354	-7.21063	5.57e-13	2.48e-11	1804.03	1936.62	1624.1	2587.42	2622.96	2588.2	2859.55	3000.84	3142.49	3732.99	4014.27	4289.32	3684.79	4043.33	4370.77	4423.98	2593.41	2258.55	2144.21
PTPRU	3512.28	1.12258	0.132351	8.48173	2.22e-17	6.65e-16	2095.53	-0.862586	0.207967	-4.15209	3.29e-05	0.00033782	4359.3	3533.15	4611.7	5378.23	5461.07	5593.63	2297.11	2035.16	1447.76	2293.35	2730.93	2405.94	1650.95	1086.74	925.603	881.455	670.419	519.045	674.62
PGM2	1910.06	1.15362	0.136055	8.47956	2.26e-17	6.76e-16	1393.59	0.472426	0.153158	3.08368	0.00204457	0.0115399	2288.51	2528.29	2327.96	2495.54	3140.66	3029.18	1027.43	894.734	1095.71	1017.36	1543.13	1532.24	803.23	937.583	849.941	890.449	1184.97	1273.45	1169.94
DUSP6	1038.39	-3.28318	0.382121	-8.47224	2.41e-17	7.19e-16	1490.42	-2.08247	0.4396	-4.80535	1.54e-06	2.18e-05	32.7076	7.02694	40.7189	269.257	177.329	183.175	206.044	131.385	159.649	1602.14	4508.87	5142.33	179.146	315.369	388.4	335.364	123.943	51.4369	27.8363
ELN	26886.9	-2.23462	0.262993	-8.47129	2.43e-17	7.24e-16	24639.6	-0.96065	0.23509	-4.08162	4.47e-05	0.000438536	9719.26	9039.46	10745.1	4024.51	5835.9	6138.63	57294	83328.5	87615.9	18584.9	10843.8	19473.4	32174.9	40272.4	40512.2	46434.4	22399.9	19853.1	18822.2
LRRC37B	247.867	-1.26326	0.149209	-8.46536	2.55e-17	7.61e-16	340.561	-0.981141	0.158968	-6.16968	6.84e-10	1.92e-08	159.449	150.376	103.542	171.538	132.787	152.646	374.498	329.777	293.372	322.717	406.548	377.148	471.868	448.548	600.255	571.789	259.154	254.067	276.725
HLA-B	722.967	-1.91301	0.225844	-8.46083	2.65e-17	7.9e-16	112.178	-2.31065	0.455236	-5.06547	4.07e-07	6.54e-06	99.1448	105.404	153.568	466.287	469.796	398.011	643.19	256.201	320.662	1956.9	1694.89	2111.55	121.772	172.601	237.076	249.274	71.3611	20.263	22.1053
CDCA4	762.666	-1.02532	0.121197	-8.46049	2.66e-17	7.92e-16	1136.88	-0.333603	0.158302	-2.10619	0.0351882	0.110997	428.265	302.159	359.489	654.289	627.796	653.552	853.41	759.407	727.29	1365.25	1069.14	1351.94	1434.34	1443.66	1459.02	1509.78	880.746	1365.41	1224.8
C17orf103	1083.88	1.25726	0.148707	8.45572	2.77e-17	8.24e-16	494.788	0.558379	0.194609	2.86263	0.00420141	0.0209084	1732.48	1455.98	1991.73	1005.33	1480.83	1478.97	845.057	819.844	697.27	434.867	533.945	530.253	223.64	168.339	157.63	195.308	324.881	250.95	252.164
CTC-786C10.1	93.167	2.69642	0.318317	8.45107	2.89e-17	8.56e-16	79.5119	1.07431	0.300518	3.57458	0.000350788	0.00264301	170.693	158.809	101.216	202.341	142.872	202.397	29.2359	35.474	12.2807	6.86632	26.8534	28.9659	45.6647	38.3557	45.3974	46.2571	86.3845	96.639	96.6082
GPR161	388.419	-1.46185	0.173006	-8.44893	2.94e-17	8.71e-16	382.736	-1.09363	0.199472	-5.48904	4.04e-08	8e-07	205.444	268.429	146.588	204.465	173.127	235.188	505.363	695.028	586.744	450.889	593.897	595.87	283.355	331.351	443.886	394.47	161.501	151.193	190.76
CTD-2292P10.4	54.6785	1.87851	0.222083	8.44534	3.03e-17	8.97e-16	24.0798	0.694157	0.557517	1.23334	0.217448	0.410073	83.8131	89.9448	111.686	63.7294	78.9997	88.1955	27.8437	24.9632	35.4776	12.5883	19.9839	18.9165	8.19622	6.39261	5.04416	7.70952	22.5351	0	12.2807
LTBP3	5639.74	-2.15806	0.255803	-8.43869	3.21e-17	9.48e-16	8922.26	-0.651869	0.26546	-2.45201	0.014206	0.0550609	1911.35	1637.28	1549.64	3053.7	1601.85	1788.79	10985.7	13674.6	12658.7	7429.36	5433.13	5952.78	11717.1	12381.4	13987.5	15404.9	7722.02	8812.85	8869.95
KLF4	10119.1	-1.03478	0.122519	-8.4381	3.23e-17	9.52e-16	20311.6	-0.421751	0.193369	-2.17945	0.029298	0.096418	1371.67	1266.25	1330.93	12621.6	10210.3	10590.2	2771.84	2078.52	2423.39	24782.9	23387.4	28594.1	20471.8	25037.7	26017.8	30615.8	25451.5	15625.9	16020.6
GNAI1	914.115	1.56257	0.185437	8.42636	3.57e-17	1.05e-15	1146.16	0.742729	0.211777	3.50744	0.000452435	0.00325641	1019.04	1166.47	1140.13	1484.37	1711.1	1698.33	456.637	338.974	300.195	333.017	618.253	702.866	1002.28	943.976	868.857	776.091	1314.55	1667.8	1542.46
PCDHGA6	37.1064	2.61501	0.308494	8.42473	3.62e-17	1.06e-15	85.2073	-0.969296	0.314248	-3.07589	0.00209874	0.0117882	62.3488	49.1886	101.216	67.9781	58.8296	47.4899	6.96093	15.7662	6.82261	8.01071	10.6165	10.0494	147.532	143.834	175.285	68.1007	52.5819	73.2586	75.3217
JMJD1C	4614.19	-1.02695	0.122022	-8.41845	3.82e-17	1.12e-15	6074.2	-0.28328	0.163909	-1.72907	0.0837957	0.21149	2148.48	2233.16	1960.32	4866.81	3796.19	3582.09	4783.55	5205.48	4831.77	6786.22	7765.63	7410.54	5849.76	5302.67	6987.42	7110.74	4138.94	5117.19	6278.72
DDX11	1651.25	-1.47038	0.174755	-8.41384	3.97e-17	1.17e-15	1220.58	-0.858374	0.21625	-3.97388	7.07e-05	0.000660836	793.158	802.477	913.266	1167.31	775.71	753.054	3087.87	2819.53	1840.74	2580.59	2307.52	1973.82	1147.47	1071.83	1370.75	1246.37	503.284	631.271	847.369
RCSD1	336.531	-1.40829	0.16765	-8.40127	4.42e-17	1.3e-15	621.672	0.961121	0.2767	3.48993	0.000483141	0.00344405	178.869	278.267	250.13	168.352	102.532	136.816	523.462	551.818	639.96	365.06	400.927	442.173	946.078	947.172	640.608	521.677	1154.92	1717.68	1643.16
GSTA1	38.1151	6.19429	0.66439	8.39598	4.62e-17	1.35e-15	2.93241	0	1.14769	0	1	1	101.189	210.808	103.542	5.84187	20.1701	15.83	0	0	0	0	0	0	0	0	0	0	0	0	0
LRRN3	139.684	2.12185	0.253103	8.3956	4.64e-17	1.36e-15	157.259	1.4369	0.250551	5.72564	1.03e-08	2.3e-07	197.268	220.646	278.052	182.16	229.435	238.58	64.0405	98.539	76.4132	27.4653	28.7269	34.8773	38.6393	26.6359	26.4818	42.4023	101.408	73.2586	99.0644
KCTD17	514.009	-1.28368	0.152892	-8.39454	4.68e-17	1.37e-15	553.217	-0.426024	0.200422	-2.12819	0.033321	0.106648	239.174	222.051	290.849	342.546	318.52	356.174	529.031	613.569	558.089	1183.3	769.381	745.428	429.716	582.793	513.243	674.583	373.707	456.697	394.62
C10orf105	173.706	-4.30114	0.528536	-8.38969	4.87e-17	1.42e-15	177.391	-2.45666	0.558021	-4.35639	1.32e-05	0.000151906	2.04422	4.21617	3.49019	6.90402	15.1276	44.0978	594.463	291.675	487.134	193.401	172.361	269.56	105.38	320.696	658.263	382.906	24.413	77.9347	80.234
MARVELD1	6963.92	-1.24744	0.148883	-8.3785	5.36e-17	1.56e-15	6155.44	0.578738	0.125282	4.61966	3.84e-06	4.98e-05	3883	3402.45	4575.64	4521.07	4009.66	4163.28	9210.7	10588.3	12923.4	10494	7663.21	8132.32	5094.54	5619.11	5157.65	5035.6	8206.53	7795.02	7448.66
COL9A2	134007	1.59591	0.190552	8.37722	5.42e-17	1.58e-15	275203	0.650883	0.173591	3.77179	0.000162081	0.00135968	210254	187858	168377	194255	223323	225870	58160	97932	71978.5	74205.5	45015	50857	435232	486866	369241	369368	663159	681115	621331
F3	1857.21	-2.41206	0.28859	-8.37633	5.46e-17	1.59e-15	1047.02	1.26662	0.275274	4.59582	4.31e-06	5.54e-05	297.434	427.238	468.849	945.851	542.913	815.243	4847.59	2371.5	3326.7	1810.42	3309.84	3123	475.381	451.745	238.337	307.096	942.718	762.201	982.457
NXF3	114.871	4.08657	0.483449	8.37386	5.58e-17	1.62e-15	27.9492	2.40766	0.805741	2.8237	0.00474733	0.023063	425.198	399.13	132.627	79.1307	148.755	137.947	5.56874	0	30.0195	6.86632	3.74699	9.45825	0	2.13087	1.26104	0	0	9.35216	9.00585
TBX22	27.1192	-3.22741	0.379972	-8.36999	5.76e-17	1.67e-15	26.6412	-3.51115	0.545849	-6.07632	1.23e-09	3.28e-08	3.06633	5.62155	0	4.77971	9.24465	5.65356	30.6281	55.1818	57.3099	51.4974	58.7028	43.7444	39.8102	31.9631	46.6585	59.1063	0	4.67608	4.09357
CSGALNACT2	1862.61	-1.40455	0.167835	-8.36798	5.86e-17	1.7e-15	1906.94	-0.424049	0.187389	-2.26544	0.0234855	0.0811666	740.009	801.071	614.273	1438.16	1232.9	1234.74	2110.55	1860.42	1667.44	2286.49	4315.9	4049.31	1570.16	1574.71	1712.49	1730.79	1087.32	1226.69	1356.61
HHAT	1074.65	-1.18653	0.141784	-8.36791	5.87e-17	1.7e-15	711.203	-0.540691	0.194571	-2.78275	0.00539	0.0255912	689.925	539.669	645.685	552.853	782.434	689.734	1069.2	1361.15	1439.57	1532.33	1754.21	1839.04	504.653	397.408	514.504	521.677	445.068	241.597	313.567
PARD3	1485.23	0.883157	0.10557	8.3659	5.97e-17	1.72e-15	1555.38	0.0527511	0.0985251	0.534757	0.592818	0.768998	1784.61	2032.19	1891.68	1737.69	2078.36	2030.76	1026.04	850.063	961.987	1110.06	1067.89	1251.44	1437.85	1535.29	1482.98	1590.73	1558.68	1602.34	1544.09
TINAGL1	210.894	2.01688	0.240836	8.36472	6.03e-17	1.74e-15	1835.39	-0.447974	0.225616	-1.95715	0.0503297	0.14613	478.348	386.482	568.901	213.494	213.467	203.528	58.4718	77.5173	143.275	61.7969	79.9357	45.5178	5093.37	5497.65	3609.1	3848.33	2467.59	3890.5	3579.42
NEIL2	404.955	-0.939276	0.112368	-8.35881	6.34e-17	1.83e-15	373.563	0.339689	0.127308	2.66641	0.00766656	0.033873	256.55	226.268	265.254	305.37	321.041	287.201	462.206	492.695	578.557	609.958	548.933	505.425	263.45	303.649	264.818	322.515	338.026	369.41	383.977
ABTB1	788.343	-1.17787	0.140996	-8.35223	6.7e-17	1.93e-15	778.176	-0.0329387	0.165192	-0.199777	0.841655	0.926522	474.26	375.239	349.019	578.345	519.381	549.526	874.293	855.318	713.644	1685.68	1222.14	1263.27	677.945	782.03	713.749	914.863	865.723	755.966	648.421
RP11-811P12.3	28.7532	4.69423	0.51599	8.34913	6.88e-17	1.98e-15	8.83186	2.3441	0.922553	2.44142	0.0146298	0.0562879	88.9237	105.404	40.7189	19.6499	36.9786	44.0978	4.17656	0	2.72904	1.14439	0.624498	0.59114	0	0	2.52208	0	11.2675	4.67608	1.63743
HDAC7	1647.85	-1.56113	0.186985	-8.34615	7.05e-17	2.03e-15	1522.42	-1.67426	0.303385	-5.54129	3e-08	6.07e-07	1138.63	923.34	816.704	850.257	545.434	572.14	3401.11	3132.23	3169.78	2379.18	1353.91	1491.45	620.571	910.948	1232.04	1147.43	381.219	236.921	280
ERRFI1	17851.8	2.04557	0.244592	8.34567	7.08e-17	2.03e-15	15991.8	1.01318	0.198675	5.10033	3.39e-07	5.52e-06	11893.3	11850.2	13669.9	38756	53098.7	49138.5	3423.39	3626.23	5665.49	4878.52	9795.24	8425.53	7500.71	7530.5	6992.47	7077.34	13511.7	15484.1	15274.8
HEPH	188.467	2.37041	0.286053	8.34558	7.09e-17	2.03e-15	243.453	-3.75023	0.355092	-10.434	1.73e-25	3.06e-23	423.154	455.346	326.914	227.833	212.627	172.999	126.689	145.838	110.526	17.1658	21.2329	21.2811	136.994	180.059	215.638	289.107	20.6572	9.35216	13.0994
HAND2-AS1	268.528	2.37295	0.284196	8.33669	7.64e-17	2.19e-15	120.111	1.12903	0.415745	2.7202	0.0065243	0.0298103	629.621	615.56	1070.33	83.9104	167.244	177.522	178.2	137.955	73.6841	40.0536	29.3514	18.9165	104.209	70.3188	85.7507	93.7991	264.787	127.813	203.86
UCHL1	2987.34	-1.68551	0.202105	-8.33424	7.8e-17	2.23e-15	1717.34	-0.0362923	0.310815	-0.138885	0.889541	0.952861	1053.8	1027.34	985.397	1579.43	1671.6	1727.73	2525.43	2400.41	3453.6	9630.02	4525.73	5267.65	252.912	335.612	293.822	486.985	510.795	244.715	244.796
SIPA1L2	880.255	-1.94746	0.233751	-8.33363	7.84e-17	2.24e-15	655.823	0.0227876	0.260152	0.072513	0.942194	0.983297	301.523	399.13	208.248	500.807	372.307	359.566	2032.59	1241.59	1279.92	976.162	1205.28	1685.93	197.88	231.2	274.907	304.526	251.642	226.011	286.55
ECSCR	30.1364	-4.43959	0.503307	-8.32962	8.11e-17	2.31e-15	97.348	-4.63051	0.796917	-5.44284	5.24e-08	1.02e-06	2.04422	0	3.49019	2.65539	0.840423	1.13071	36.1968	13.1385	27.2904	111.006	79.3112	84.5331	14.0507	37.2903	15.1325	42.4023	0	0	0
RP11-252O2.2	29.5689	6.1125	0.692975	8.32478	8.45e-17	2.41e-15	3.60177	0	1.16221	0	1	1	105.278	84.3233	103.542	6.90402	37.819	16.9607	0	0	0	0	0	0	0	0	0	0	0	0	0
BCR	2316.95	-1.72924	0.207853	-8.32404	8.5e-17	2.42e-15	1536.05	-1.04519	0.249247	-4.20772	2.58e-05	0.000272895	807.468	847.449	895.815	1508.8	1046.33	1317.28	3565.39	4033.53	4240.93	4290.31	2571.06	2679.05	694.337	663.766	1010.09	1027.94	456.336	372.528	392.983
PVRL4	127.246	2.69064	0.323435	8.31706	9.02e-17	2.56e-15	75.118	-4.04361	0.878482	-4.2011	2.66e-05	0.00028032	65.4151	71.6748	115.176	159.324	452.147	459.069	15.314	7.88312	6.82261	70.952	61.2008	41.971	2.34178	9.58892	20.1766	73.2404	0	0	0.818714
PITPNM3	997.189	-1.47175	0.177087	-8.31125	9.47e-17	2.69e-15	431.026	-1.30534	0.321421	-4.10038	4.12e-05	0.00040888	491.636	462.373	436.274	611.803	527.785	584.578	1705.43	1579.25	1958.09	991.04	1247.75	1370.26	83.1331	87.3657	112.233	136.201	78.8728	21.8217	27.8363
ST3GAL6	183.621	1.80345	0.217032	8.30926	9.63e-17	2.73e-15	218.55	1.033	0.225399	4.5875	4.49e-06	5.76e-05	249.395	268.429	262.928	299.528	362.222	271.371	59.864	98.539	130.994	68.6632	71.8172	59.7052	221.298	169.404	200.505	185.028	540.842	360.058	305.38
TLDC2	19.264	3.82821	0.453839	8.308	9.73e-17	2.75e-15	16.7138	-0.657145	0.971041	-0.934793	0.349895	0.558605	7.15478	7.02694	3.49019	70.1024	64.7125	66.712	0	1.31385	0	4.57755	3.12249	2.9557	0	0	1.26104	3.85476	0	0	0.818714
RPTN	50.2278	5.76771	0.663494	8.30848	9.69e-17	2.75e-15	33.417	0	1.08681	0	1	1	8.17689	11.2431	63.9868	95.0631	195.819	225.012	0	0	0	3.43316	0	0	0	0	0	0	0	0	0
RCN1	12648.5	0.857973	0.103298	8.30583	9.91e-17	2.8e-15	11358.2	1.00682	0.12489	8.06163	7.53e-16	4.73e-14	14784.8	16459.9	13891	15081	19600.3	18072.2	8298.82	7507.36	9038.59	10135.8	8783.56	10128.6	7507.74	8602.33	6432.57	7353.59	16182.1	14773.3	14195.7
NR4A3	2101.1	2.68415	0.319662	8.304	1.01e-16	2.84e-15	11452.8	0.546786	0.309608	1.7973	0.0722886	0.190063	41.9066	54.8101	33.7385	9463.29	6202.32	6907.52	8.35312	7.88312	13.6452	407.402	814.345	1257.95	21641.5	19432.5	17338	15546.2	23154.8	28081.4	30881.1
DNALI1	359.567	-1.84046	0.221396	-8.29977	1.04e-16	2.94e-15	451.27	-1.52693	0.307152	-4.97018	6.69e-07	1.04e-05	111.41	108.215	108.196	152.951	200.021	163.953	224.142	324.522	292.007	1153.54	748.148	727.694	529.242	548.699	490.545	601.342	103.286	135.606	307.836
HMGA2	839.798	-2.24917	0.269887	-8.29837	1.06e-16	2.97e-15	1672.4	-1.09619	0.194657	-5.62821	1.82e-08	3.85e-07	127.764	163.025	95.3985	341.484	342.892	303.031	566.62	366.565	270.175	1999.24	3047.55	2453.82	2540.83	2348.22	2499.38	2513.3	935.206	1195.52	1321.4
OXCT2P1	90.5413	2.01683	0.242907	8.29458	1.09e-16	3.07e-15	57.7796	2.43898	0.51941	4.68009	2.87e-06	3.83e-05	126.742	99.7826	148.915	148.702	173.968	177.522	23.6672	53.868	42.3002	22.8878	36.2209	31.9216	23.4178	6.39261	6.3052	5.13968	107.042	23.3804	54.8538
F11R	458.225	2.18339	0.263377	8.28863	1.15e-16	3.22e-15	217.561	0.402135	0.406278	0.965552	0.334269	0.542298	610.2	670.37	1330.92	331.924	712.678	877.432	182.376	173.429	207.407	163.647	134.267	104.041	69.0824	66.057	89.5339	64.246	150.234	51.4369	86.7837
FJX1	144.315	-2.36209	0.285281	-8.28752	1.16e-16	3.24e-15	224.567	0.871481	0.289599	3.00293	0.00267393	0.0144032	29.6412	18.2701	32.5751	86.0348	67.2338	50.882	231.103	136.641	236.062	418.846	189.223	235.274	110.064	156.619	104.666	152.905	208.45	260.302	255.439
PCDHGB1	107.913	2.1635	0.260834	8.28742	1.16e-16	3.24e-15	84.4334	-0.807423	0.279222	-2.89597	0.00377991	0.0191568	108.344	123.674	194.287	252.793	186.574	200.136	48.7265	42.0433	42.3002	22.8878	31.2249	41.971	60.8862	70.3188	64.313	75.8102	24.413	38.9673	47.4854
FAM171A2	268.654	-1.56716	0.189149	-8.28521	1.18e-16	3.3e-15	498.477	-0.53576	0.171478	-3.12341	0.00178767	0.0103414	163.538	92.7556	79.1109	160.386	173.968	139.078	421.832	399.411	311.111	417.701	467.124	397.838	704.875	817.189	546.03	597.488	495.772	484.753	401.988
S100A6	11442.7	-2.07217	0.249552	-8.28023	1.23e-16	3.44e-15	9545.96	-1.60943	0.363195	-4.45523	8.38e-06	0.000100903	1390.07	1200.2	1211.1	5270.96	6834.32	6919.96	4599.78	3815.43	4917.73	57741.2	22782.3	20629	2146.24	3139.84	4259.79	6076.38	1440.37	1192.4	1083.16
MMP14	26441.7	-0.87104	0.105209	-8.27951	1.24e-16	3.46e-15	27343.2	-0.00457028	0.122783	-0.0393457	0.968615	0.995992	16168.8	16191.5	13032.4	24571.4	20592.9	21948.2	32326.6	26037.9	28317.9	36516.3	42212.3	39384.2	20977.6	21488.8	23369.6	23535.9	22867.5	22403.1	21535.5
PPP1R13L	973.965	-2.07146	0.250143	-8.27299	1.31e-16	3.65e-15	381.29	-0.641059	0.293536	-2.19643	0.0280609	0.0933499	356.717	307.78	404.862	383.439	240.361	324.514	3158.87	1968.15	1786.16	822.815	791.238	1142.67	180.317	157.684	160.152	140.056	138.966	68.5825	98.2457
SGK1	7088.3	-1.60301	0.194536	-8.27212	1.32e-16	3.67e-15	8221.38	0.0712561	0.295513	0.225715	0.821423	0.914675	620.422	522.804	570.064	7097.87	7776.43	7548.63	3073.95	1665.97	2109.55	14840.4	17809.4	21424.1	2409.69	3051.41	3387.15	4800.46	5722.03	2322.45	2688.66
TNFSF9	285.345	-2.00041	0.242841	-8.26921	1.35e-16	3.75e-15	301.436	0.479956	0.209376	2.28938	0.0220571	0.077321	28.6191	33.7293	29.0849	222.522	242.042	214.835	193.514	114.305	236.062	785.05	513.337	811.045	165.095	185.386	137.453	142.626	262.909	193.278	208.772
VSTM4	608.232	-1.41965	0.171666	-8.2689	1.35e-16	3.76e-15	449.677	-0.539468	0.229139	-2.36841	0.0178647	0.0657505	328.098	349.942	293.176	381.315	305.073	300.769	1101.22	1053.71	856.919	533.285	896.154	899.125	241.203	199.237	272.385	300.671	185.915	134.048	197.31
SLC26A11	1319.69	-1.23945	0.149949	-8.26802	1.36e-16	3.78e-15	897.673	-0.623323	0.142627	-4.37661	1.21e-05	0.000139569	654.151	524.21	667.789	1081.28	923.625	910.223	1924	1860.42	1466.86	2245.29	1841.64	1736.77	470.697	584.924	461.541	525.532	351.172	300.828	340.585
CABYR	313.492	1.65242	0.19993	8.2678	1.36e-16	3.79e-15	218.4	0.845964	0.255935	3.30096	0.000963554	0.00613237	444.618	410.373	331.568	445.044	639.562	573.271	111.375	72.2619	136.452	256.343	176.108	164.928	112.405	106.544	105.927	65.5309	232.863	146.517	154.737
CTTNBP2	221.043	3.25594	0.392723	8.26542	1.39e-16	3.86e-15	255.773	-0.715066	0.634948	-1.16481	0.244096	0.443127	448.707	413.184	901.632	146.578	302.552	228.404	94.6686	19.7078	25.9259	8.01071	31.2249	31.9216	98.3547	80.9731	136.192	194.023	184.037	15.5869	22.1053
GAS1	2069.64	-1.64508	0.199073	-8.26215	1.43e-16	3.96e-15	4123.74	-3.27032	0.254303	-12.8751	6.21e-38	3.19e-35	976.116	937.394	478.156	1188.02	1043.81	1264.14	2944.47	1843.34	2341.52	3234.04	3865.01	4719.67	2558.39	2996.01	4644.41	5387.67	486.382	330.443	361.053
ADCY4	411.339	-2.84927	0.343932	-8.25705	1.49e-16	4.13e-15	234.106	-1.14429	0.391998	-2.95171	0.00316019	0.0164742	113.454	84.3233	52.3528	66.3848	79.8402	46.3592	1413.07	1413.71	870.564	377.648	240.432	177.933	70.2533	119.329	71.8793	147.766	75.117	21.8217	39.2983
RIPK3	119.32	-2.21247	0.267952	-8.25431	1.53e-16	4.22e-15	60.6178	-1.65581	0.490888	-3.3806	0.000723275	0.00484218	35.7739	26.7024	33.7385	68.5092	49.5849	29.3985	246.417	237.807	176.023	230.022	153.626	144.238	14.0507	26.6359	29.0039	38.5476	0	10.9108	10.6433
TROAP	422.002	-2.21204	0.267833	-8.25402	1.53e-16	4.23e-15	778.543	-0.482189	0.277275	-1.73339	0.0830266	0.21015	165.582	143.35	101.215	192.782	118.5	118.725	632.052	500.578	361.598	1378.99	628.869	721.783	1184.94	1255.08	1126.11	991.958	905.159	699.853	834.269
TIMP1	7545.93	-1.99448	0.241792	-8.25065	1.58e-16	4.34e-15	5625.51	0.0836618	0.292749	0.282367	0.777662	0.891495	2060.58	1645.71	3497.17	3835.98	3509.61	3393.27	10615.4	9304.71	12211.1	21434.4	9401.81	9641.5	3012.7	4271.33	3887.79	4900.68	5845.98	3341.84	3591.7
VIPR1	156.115	3.29089	0.398408	8.25054	1.58e-16	4.34e-15	100.748	-2.66041	0.447071	-5.91125	3.4e-09	8.31e-08	371.026	275.456	205.921	283.596	260.531	319.991	2.78437	61.7511	31.384	22.8877	26.2289	11.8228	86.6458	109.74	155.108	246.704	13.1455	29.6152	22.924
SEMA4C	1806.78	-0.979406	0.118739	-8.2496	1.59e-16	4.37e-15	3044.99	-0.480193	0.0853555	-5.62358	1.87e-08	3.93e-07	1056.86	944.421	948.168	1555.53	1409.39	1447.31	2322.17	2414.86	2026.31	2217.82	2687.84	2650.67	4922.42	5082.13	4593.97	4707.94	3384.02	3486.8	3504.91
TESC	73.8926	-2.9601	0.356974	-8.24709	1.62e-16	4.46e-15	24.538	-1.22732	0.639851	-2.00099	0.0453935	0.134981	17.3759	18.27	36.0653	7.4351	3.36169	6.78427	186.553	319.266	147.368	81.2515	28.1024	34.8773	7.02533	10.6544	11.3494	10.2794	5.63377	4.67608	1.63743
PAPD7	1845.86	-1.18604	0.143838	-8.24548	1.64e-16	4.51e-15	2298.58	-0.342623	0.173528	-1.96968	0.0488749	0.142757	1250.04	1200.2	912.103	1222.54	1037.92	1097.92	3310.62	2791.94	2202.34	2038.15	2608.53	2478.06	3464.66	2977.89	3916.79	3564.37	1922.99	3073.74	3223.28
HIST1H4H	73.608	1.4685	0.178009	8.24431	1.66e-16	4.55e-15	268.06	0.54091	0.240433	2.27104	0.0231446	0.0801771	100.167	106.809	104.706	98.2496	135.308	106.287	36.1968	40.7294	28.6549	42.3423	42.4658	41.3798	447.279	609.429	356.874	389.331	773.705	575.158	636.141
RGS9	119.208	-2.10369	0.255383	-8.2422	1.69e-16	4.63e-15	89.5808	-1.22292	0.318007	-3.84938	0.000118417	0.00103761	21.4643	25.297	33.7385	92.4077	51.2658	48.6206	160.101	198.392	132.359	272.364	202.962	191.53	78.4495	88.4312	66.8351	68.1007	30.0468	40.526	26.1988
TIE1	137.736	-1.43812	0.174578	-8.23904	1.74e-16	4.75e-15	485.87	-0.547526	0.376646	-1.48217	0.138295	0.301836	34.7518	50.594	46.5358	109.402	102.532	107.418	107.198	124.816	178.752	274.653	256.668	259.511	159.241	218.414	118.538	201.732	208.45	82.6107	65.4971
SLC35E4	925.23	-2.10718	0.254683	-8.23737	1.76e-16	4.81e-15	733.008	-1.82094	0.243612	-7.48374	7.22e-14	3.62e-12	180.914	137.728	168.692	373.348	385.754	365.22	502.579	390.214	390.253	3350.77	2244.44	2612.84	121.772	149.161	194.2	221.006	54.4598	38.9673	49.1228
ITGA9	1999.16	-1.9247	0.234056	-8.23026	1.87e-16	5.1e-15	2584.64	-1.20949	0.279516	-4.31988	1.56e-05	0.000175868	897.414	1231.12	1005.17	684.561	557.2	642.244	4006.71	2199.39	2741.32	2199.51	3648.32	4177	4088.74	4058.24	5153.87	4282.64	1032.86	2451.82	2155.67
SLPI	2215.91	3.2895	0.399722	8.22358	1.98e-16	5.38e-15	1111.71	-0.664421	0.478729	-1.39254	0.163759	0.339021	1904.19	1791.87	4726.88	3239.58	7272.18	5541.62	464.99	148.465	253.801	859.435	190.472	197.441	100.696	126.787	88.2728	104.079	103.286	34.2912	58.1287
CD79B	226.382	-5.14937	0.636839	-8.20765	2.26e-16	6.14e-15	68.3965	-5.22903	0.757414	-5.70398	1.17e-08	2.58e-07	3.06633	2.81078	0	4.77971	6.72338	4.52285	533.207	620.139	1173.49	231.166	79.9357	56.7495	33.9558	90.562	83.2286	141.341	1.87792	1.55869	0
MSANTD2	441.473	-1.29001	0.157158	-8.20571	2.29e-16	6.23e-15	558.166	-0.513655	0.174232	-2.94421	0.00323776	0.0168092	278.014	337.293	296.666	231.019	170.606	183.175	725.329	960.426	817.348	518.408	436.524	342.862	848.894	861.938	890.294	930.282	600.936	564.247	683.626
GREM2	167.353	2.22534	0.271341	8.20378	2.33e-16	6.33e-15	32.2961	-0.565679	0.778307	-0.983333	0.325444	0.534283	518.21	657.722	254.784	98.2496	58.8296	65.5813	108.591	82.7727	121.442	13.7326	9.99196	18.3254	4.68356	0	5.04416	1.28492	3.75585	1.55869	0
TRIM51BP	29.3861	6.01099	0.674473	8.20298	2.34e-16	6.36e-15	2.72953	0	1.14351	0	1	1	55.194	92.7556	162.875	10.6216	21.0106	10.1764	0	0	0	0	0	0	0	0	0	0	0	0	0
AC015933.2	21.7015	5.80477	0.6413	8.2007	2.39e-16	6.47e-15	5.80145	1.63121	1.1749	1.40493	0.160042	0.333392	59.2825	73.0802	50.026	21.2431	29.4148	26.0064	0	0	1.36452	0	0	0	0	1.06544	0	0	7.5117	0	0
CTC-558O2.2	155.688	5.95631	0.698082	8.19643	2.48e-16	6.7e-15	32.538	-1.695	0.947829	-1.84529	0.064996	0.175687	367.96	390.698	623.58	102.498	174.808	202.397	0	0	0	5.72194	0	0.59114	10.538	0	3.78312	3.85476	0	0	1.63743
AMOTL1	11988.7	1.65168	0.201592	8.19236	2.56e-16	6.92e-15	7714.29	0.00190297	0.273785	0.00306573	0.997554	1	21528.7	20515.9	20751.5	14436.3	15879	16679.1	6042.09	6064.74	5807.4	2762.55	6028.9	7368.57	5450.49	5072.54	6602.81	5787.28	4450.68	6060.2	6680.71
HSD3B7	270.692	-1.61267	0.196919	-8.19061	2.6e-16	7.02e-15	237.939	-2.12197	0.393715	-5.4055	6.46e-08	1.24e-06	102.211	85.7287	125.647	207.121	124.383	153.777	480.304	295.617	371.15	501.242	389.686	411.434	96.0129	147.03	253.469	359.777	24.413	62.3477	51.579
RP13-726E6.2	171.679	2.44529	0.299185	8.18671	2.68e-16	7.24e-15	62.9866	2.24336	0.453336	4.94154	7.75e-07	1.18e-05	419.066	369.617	332.731	232.081	146.234	227.273	30.6281	131.385	92.7874	22.8878	31.2249	24.2368	17.5633	12.7852	23.9598	5.13968	125.821	52.9956	48.3041
ZFYVE28	104.815	-2.9292	0.359201	-8.18323	2.76e-16	7.44e-15	64.6466	-1.22627	0.383213	-3.2251	0.00125927	0.00774308	13.2874	9.83772	11.634	32.9269	32.7765	42.9671	284.006	229.924	103.704	209.423	154.875	132.416	37.4684	43.6829	49.1806	30.8381	33.8026	9.35216	10.6433
RPS6KA5	741.226	2.40513	0.29417	8.17662	2.92e-16	7.86e-15	558.704	-0.198816	0.36663	-0.530146	0.596011	0.771157	1565.87	2015.33	1384.44	756.256	1018.59	785.845	363.361	291.675	278.362	40.0536	177.982	216.949	764.59	704.253	848.68	637.32	552.11	688.942	688.538
HFE	1584.62	1.6934	0.207805	8.15944	3.37e-16	9.05e-15	748.284	-0.0763055	0.161581	-0.475295	0.634576	0.799376	2725.97	1987.22	3326.15	1972.43	2121.23	2200.37	768.487	1232.39	1249.9	468.054	425.283	537.938	488.261	327.089	428.754	375.196	437.556	350.706	365.965
SLC7A10	20.3669	4.54521	0.503146	8.15879	3.38e-16	9.09e-15	24.397	0.73618	0.508314	1.44891	0.147362	0.314954	41.9066	42.1616	48.8626	23.3675	38.6594	41.8363	1.39219	1.31385	1.36452	2.28877	1.249	0	16.3924	11.7198	23.9598	7.70952	15.0234	37.4086	23.7427
INHBE	192.42	-2.38979	0.292646	-8.1574	3.42e-16	9.18e-15	62.2152	0.554795	0.386641	1.42778	0.153356	0.323833	65.4151	63.2425	27.9215	56.2943	55.4679	58.797	398.165	408.608	589.473	152.204	179.855	253.599	31.614	11.7198	8.82728	29.5531	24.413	34.2912	31.1111
NCKAP5	124.355	2.74982	0.336159	8.1573	3.43e-16	9.18e-15	465.88	0.768538	0.368208	2.12139	0.0338891	0.108012	207.489	178.484	543.306	114.713	129.425	146.993	15.314	48.6126	46.3937	13.7326	20.6084	27.1925	963.641	812.928	733.925	495.979	1070.42	1485.43	1370.53
PDE7B	724.555	1.72792	0.21238	8.15404	3.52e-16	9.42e-15	397.583	0.243877	0.183196	1.33069	0.183292	0.365954	1337.94	1583.87	1130.82	698.369	895.05	860.472	613.954	596.489	463.937	127.027	190.472	196.259	353.608	238.658	339.22	310.95	373.707	383.438	347.953
BRINP1	66.6103	3.60688	0.439719	8.15333	3.54e-16	9.46e-15	64.1972	-4.53092	0.684065	-5.92226	3.18e-09	7.84e-08	114.476	64.6479	52.3528	304.839	125.223	88.1955	9.7453	13.1385	9.55165	5.72194	3.74699	7.68483	36.2976	68.1879	61.791	84.8047	3.75585	0	1.63743
MCAM	4099.12	1.71046	0.209938	8.15047	3.63e-16	9.68e-15	4388.2	-0.669927	0.186375	-3.60237	0.000315324	0.0024188	4965.42	4595.62	5232.96	8599.23	7101.57	7441.21	1765.29	2451.65	2322.41	1354.95	1542.51	1816.57	2604.06	3067.39	3007.58	3452.58	1738.96	2074.62	1882.22
CDH13	401.022	-1.89532	0.23298	-8.15023	3.63e-16	9.69e-15	648.235	-2.53316	0.41758	-6.08954	1.13e-09	3.04e-08	223.842	327.455	233.843	65.8538	112.617	116.463	853.41	651.671	672.709	502.386	416.54	635.476	277.501	267.424	548.552	989.388	67.6053	107.55	76.9591
PODNL1	1001.95	-3.09752	0.382273	-8.14465	3.8e-16	1.01e-14	651.741	0.925756	0.3062	3.03566	0.00240011	0.0131788	103.233	37.9455	229.189	383.439	206.744	209.182	2231.67	2148.15	2090.45	1939.74	994.2	1449.48	532.754	662.701	329.132	375.197	995.3	877.544	872.749
LINC00937	645.974	1.79083	0.220168	8.1347	4.13e-16	1.1e-14	357.279	1.20958	0.330144	3.65515	0.000257036	0.00203031	1164.18	1295.77	828.338	939.478	840.423	956.582	348.046	387.587	271.54	376.503	184.227	159.017	153.386	91.6275	90.7949	137.486	356.806	191.719	284.913
DUSP2	7279.27	1.31773	0.162178	8.12963	4.31e-16	1.14e-14	9084.69	0.162455	0.184768	0.884119	0.376632	0.584776	735.92	557.939	503.751	22642	18175	19727.5	218.573	231.238	257.894	10562.7	6165.66	7573.1	5048.87	6653.65	5094.6	5886.22	6281.66	6633.8	6151
WISP3	414.851	2.52575	0.311397	8.12932	4.32e-16	1.15e-14	580.173	1.45619	0.336781	4.35578	1.33e-05	0.000152245	436.442	500.318	511.894	537.983	1293.41	940.752	33.4125	42.0433	106.433	283.808	149.255	142.465	667.407	628.607	384.617	426.593	1842.24	1357.62	1263.28
PTP4A1	9009.65	1.65329	0.203606	8.12779	4.37e-16	1.16e-14	13392.3	-0.11436	0.219358	-0.51181	0.608784	0.780623	9655.89	11279.6	11944.6	14188.8	17258.1	16892.8	2652.11	2710.48	3000.58	3518.99	7048.7	7965.03	17278.8	19461.2	18726.5	20310.7	16685.4	17915.6	17941.3
PKIA	60.4856	-3.59679	0.440505	-8.12364	4.52e-16	1.2e-14	154.94	1.38901	0.596761	2.31274	0.020737	0.0738916	4.08845	5.62155	3.49019	18.0567	3.36169	12.4378	158.709	89.342	121.442	41.1979	116.156	151.923	21.076	35.1594	71.8793	57.8214	276.055	67.0238	47.4854
PHEX	200.799	-1.66632	0.205457	-8.11546	4.84e-16	1.28e-14	77.9479	1.10274	0.534174	2.05703	0.0396838	0.12172	151.272	164.43	166.366	40.362	37.819	30.5292	636.229	504.52	286.549	120.161	144.259	127.095	12.8798	34.0939	56.7468	48.8269	165.257	49.8782	42.5731
RP11-483I13.5	38.9698	2.00865	0.246992	8.10874	5.11e-16	1.35e-14	35.6942	0.205752	0.380144	0.548067	0.583646	0.762131	61.3267	73.0802	68.6404	45.6728	73.9572	54.2742	13.9219	17.0801	19.1033	12.5883	14.9879	13.0051	35.1267	33.0285	37.8312	39.8325	60.0936	51.4369	19.6491
SLC25A24	1731.4	1.83515	0.226463	8.10333	5.35e-16	1.41e-14	1508.89	-0.206792	0.276489	-0.749348	0.453648	0.656026	2882.35	3260.5	2316.32	2393.04	2870.88	2589.33	689.132	677.948	787.329	358.193	870.55	1081.2	1463.61	1350.97	1445.15	1364.58	1023.47	1379.44	1242.81
TGM2	7259.63	-2.29641	0.282844	-8.10114	5.44e-16	1.44e-14	5334.99	-0.0627135	0.514312	-0.160424	0.872547	0.943902	1279.68	1138.36	2092.95	2648.49	2557.41	2874.27	8659.4	3225.51	4547.95	13234.8	20149.4	24707.3	245.887	290.864	670.873	900.729	1094.83	149.635	247.252
GPR75-ASB3	2057.71	0.855471	0.105666	8.09602	5.68e-16	1.5e-14	1812.02	-0.292713	0.159925	-1.82833	0.0675001	0.180661	2397.87	2765.8	2549	2505.63	2938.12	2760.07	1346.24	1718.52	1465.5	1266.84	1508.16	1470.76	2231.71	1922.05	2165.21	2013.47	1680.74	1605.45	1809.36
ACTA2	2189.81	2.92567	0.368527	8.09334	5.8e-16	1.53e-14	884.734	-0.733203	0.366267	-2.05373	0.0400022	0.122383	3775.68	3632.93	6769.8	3901.84	2146.44	2176.62	751.78	1232.39	1451.85	164.792	98.0461	175.569	73.766	67.1225	89.5338	161.9	41.3143	62.3477	66.3158
RRAS2	902.053	1.31706	0.162781	8.09232	5.85e-16	1.54e-14	1203.07	1.4106	0.170759	8.26557	1.39e-16	9.61e-15	1316.48	1278.9	1266.94	1044.63	1515.28	1298.06	430.185	349.485	521.247	502.386	607.636	693.408	1012.82	1131.49	842.375	844.192	2469.47	2765.12	2450.41
LINC00984	203.309	1.5035	0.185786	8.09171	5.88e-16	1.55e-14	108.371	1.93233	0.322768	5.9759	2.29e-09	5.75e-08	253.484	285.294	266.418	373.348	337.01	288.332	111.375	122.188	118.713	125.883	74.3152	83.3508	30.4431	27.7013	15.1325	10.2794	99.53	85.7281	66.3158
PRKX	3506.95	2.41993	0.300194	8.08315	6.31e-16	1.66e-14	1369.68	0.802242	0.287509	2.77127	0.00558385	0.0263206	6189.91	6352.35	6368.43	3996.9	6912.48	5613.98	1207.03	593.861	353.411	1272.56	1631.19	1591.35	213.102	153.423	127.365	107.933	384.974	215.1	196.491
VAV2	1118.6	-1.34011	0.165879	-8.07841	6.56e-16	1.72e-14	1633.14	-0.521444	0.203615	-2.55241	0.0106979	0.0440669	605.09	583.236	597.986	718.549	595.019	647.898	2086.89	1832.83	1631.97	989.895	1586.85	1547.02	2954.15	3167.54	2773.03	2794.7	1474.17	2507.94	2113.92
C1orf112	629.818	1.57737	0.195508	8.07273	6.87e-16	1.8e-14	550.348	-0.362674	0.189117	-1.91879	0.0550103	0.155681	844.264	950.042	976.089	882.653	1044.65	941.883	245.025	170.801	290.643	299.83	450.263	461.681	576.077	577.466	553.597	677.153	375.585	490.988	516.608
LRP4	7354.17	2.18985	0.272039	8.07086	6.98e-16	1.83e-14	3312.12	-0.98943	0.226026	-4.38899	1.14e-05	0.000132519	11670.5	11375.2	18360.7	8641.71	11281	10937.4	2117.51	1753.99	1348.15	2974.26	4474.52	3315.12	1251.68	1332.86	1379.58	1245.09	373.707	840.135	732.749
NPR2	3523.97	-1.52116	0.188757	-8.05619	7.87e-16	2.06e-14	3097.6	-0.738562	0.223902	-3.29718	0.000976618	0.00619762	1514.77	1481.28	1378.62	2099.35	2096.86	2026.24	3526.41	3707.69	4002.14	10373.9	5205.81	4874.55	3408.46	3704.52	3441.38	3145.48	1787.78	2208.67	2133.57
LINC01088	473.417	2.01843	0.251001	8.05321	8.07e-16	2.1e-14	284.967	0.0387767	0.208208	0.184458	0.853654	0.93384	651.085	961.285	440.927	938.947	736.21	814.112	243.632	243.063	263.353	120.161	129.895	138.327	163.924	108.674	157.63	100.224	108.92	132.489	161.287
RAB40B	656.255	1.34681	0.167343	8.04804	8.41e-16	2.19e-14	684.503	-0.013713	0.234011	-0.0510671	0.959272	0.992124	1288.88	1335.12	1001.68	824.765	498.371	711.218	414.871	465.104	548.537	308.985	207.958	269.56	834.844	1072.89	915.515	1128.16	1015.96	1075.5	849.825
AC011043.1	177.904	-1.58749	0.197195	-8.04483	8.64e-16	2.25e-14	533.293	-0.302674	0.265107	-1.13003	0.258463	0.46005	95.0563	99.7826	94.2351	83.9104	67.2338	67.8427	360.576	415.178	296.101	244.899	171.112	138.918	909.781	861.938	902.905	952.125	743.658	788.699	672.983
C6orf99	59.9899	3.81254	0.473043	8.04435	8.67e-16	2.26e-14	38.2519	0.680855	0.511777	1.35027	0.176931	0.357243	165.582	161.62	105.869	49.3903	117.659	81.4112	1.39219	3.94156	1.36452	18.3102	6.24498	7.09369	17.5633	40.4866	26.4818	30.8381	84.5066	35.8499	25.3801
ABHD6	863.958	1.95538	0.243198	8.03888	9.07e-16	2.36e-14	387.114	0.748963	0.219682	3.40162	0.000669886	0.00454829	1810.16	1399.77	2301.2	744.572	1185.84	932.837	226.926	341.602	354.776	343.316	387.188	339.315	98.3547	129.983	95.8391	128.492	217.839	163.663	192.398
AMACR	880.255	-1.15419	0.143686	-8.03264	9.54e-16	2.48e-14	482.563	-0.24825	0.179089	-1.39411	0.163285	0.338229	474.26	459.562	591.005	545.418	520.222	676.166	1109.57	999.842	1393.18	1043.68	1287.09	1463.07	214.273	230.134	237.076	232.57	199.06	219.776	162.105
SYT14	30.1895	3.40603	0.417053	8.03233	9.56e-16	2.48e-14	12.2256	0	1.12241	0	1	1	29.6412	43.567	91.9083	58.4187	43.702	66.712	4.17656	6.56926	6.82261	4.57755	4.99598	1.18228	0	0	0	0	0	0	0
STX1A	1515.64	-1.79675	0.224447	-8.02624	1.01e-15	2.6e-14	1316.43	-0.553847	0.220248	-2.52586	0.0115416	0.0467731	104.255	57.6209	148.915	1425.42	1274.08	1341.02	485.873	387.587	421.637	5665.86	3969.93	2905.46	329.02	351.594	354.352	363.632	244.13	207.306	257.895
PLK3	1159.88	-1.22722	0.153193	-8.02607	1.01e-15	2.6e-14	1323.69	0.304382	0.146993	2.06828	0.0386139	0.119292	156.383	217.835	172.183	1284.15	1275.76	1436	537.384	495.322	566.276	2846.09	2720.94	2210.27	775.128	821.451	665.829	641.175	999.056	746.614	946.433
FASN	54271.4	1.57051	0.195695	8.02599	1.01e-15	2.6e-14	28500.2	0.96962	0.218937	4.42484	9.65e-06	0.000114335	101885	82171.6	74381.7	68331.8	66422	95510.1	25461.7	21785	26825.1	18804.6	38673.9	31004.1	10047.4	9096.69	7605.33	7074.77	16414.9	17192.4	16326.8
ZNF385D	2010.63	-1.28305	0.159864	-8.02359	1.03e-15	2.65e-14	1564.68	0.285779	0.186277	1.52954	0.126131	0.283108	1179.52	1246.58	905.122	1143.94	1093.39	1241.52	2255.34	1974.72	2079.53	3724.98	3807.56	3475.32	471.868	901.359	635.564	567.934	709.855	759.083	885.848
ESYT1	2549.84	-0.836875	0.104313	-8.02229	1.04e-15	2.68e-14	1865.11	0.133794	0.222066	0.594619	0.552098	0.737938	1553.61	1465.82	1482.17	2250.18	1953.14	2213.93	2812.22	2661.87	2274.66	3371.37	4284.05	4275.13	817.28	823.582	1240.86	1051.06	953.985	1056.79	1219.88
SLC35D1	9711.97	2.15166	0.26851	8.01981	1.06e-15	2.73e-14	7495.22	1.24241	0.300711	4.1436	3.42e-05	0.000349122	19432.4	20250.2	15405.7	11814.4	14714.1	14086.4	2507.33	2977.19	2977.38	1835.6	4546.34	5996.53	6240.84	5715	4397.25	4172.13	11192.4	13152.2	12682.7
FLOT2	738.594	-1.21071	0.151101	-8.01458	1.11e-15	2.84e-14	847.208	0.183764	0.191503	0.95595	0.339098	0.54694	377.159	331.672	298.993	716.956	513.498	462.461	949.471	794.881	959.258	1209.62	1071.01	1178.14	578.419	726.627	593.95	823.633	880.746	759.083	684.445
XAGE5	26.0817	4.60446	0.52905	8.01494	1.1e-15	2.84e-14	5.28641	0	1.20358	0	1	1	87.9016	59.0263	52.3528	19.1188	54.6275	30.5292	2.78437	0	5.45808	0	0	1.18228	0	0	0	0	0	0	0
RAI14	1411.43	-1.5376	0.191826	-8.01389	1.11e-15	2.85e-14	1502.94	-1.5753	0.264883	-5.96017	2.52e-09	6.3e-08	712.412	692.856	680.587	816.268	600.062	703.303	2615.92	2739.38	2499.8	1071.15	1787.31	2018.15	1173.23	1167.72	1377.06	1498.22	341.782	503.458	444.562
TM6SF1	59.9051	-2.54062	0.317168	-8.01156	1.13e-15	2.91e-14	50.5204	-1.55048	0.36986	-4.19251	2.76e-05	0.000288805	6.13267	4.21616	13.9608	27.6161	28.5744	26.0064	76.5702	70.9481	128.265	92.6954	116.781	127.095	38.6393	33.0285	49.1806	39.8325	3.75585	14.0282	18.0117
EGF	150.332	1.86744	0.233517	8.00091	1.24e-15	3.16e-14	75.6288	0.712099	0.728364	0.948925	0.342659	0.55075	197.267	220.646	195.451	274.568	252.967	272.502	55.6874	32.8463	38.2066	59.5081	73.6907	130.642	0	0	3.78312	3.85476	1.87792	1.55869	4.91228
EMILIN1	6870.83	-1.77062	0.22141	-7.99945	1.25e-15	3.2e-14	11629.6	-0.105607	0.290621	-0.357427	0.720772	0.857863	2768.9	2414.46	2362.86	5703.79	2223.76	3139.99	10451.1	9642.37	9877.77	14214.4	8440.08	11210.4	15382	18065.5	15116.1	15120.9	14373.6	16076.4	13947.6
FBXL2	1350.91	0.973619	0.121768	7.99595	1.29e-15	3.29e-14	915.256	0.305362	0.158819	1.92733	0.0539388	0.153536	2093.28	2143.22	1693.9	1466.84	1707.74	1628.22	1059.45	1129.91	974.268	621.402	822.463	870.159	1017.5	977.005	823.459	837.768	1400.93	1013.15	988.188
SPTLC3	2808.6	2.13922	0.267671	7.99411	1.31e-15	3.33e-14	1073.39	-0.420517	0.383859	-1.11601	0.264416	0.466569	5238.32	6023.49	6847.75	2379.23	3724.75	3648.81	711.407	881.595	996.1	616.825	1244	1390.95	331.361	152.357	355.613	226.146	332.393	113.785	145.731
FXYD1	362.715	2.39092	0.300152	7.98786	1.37e-15	3.5e-14	332.258	-1.00255	0.336085	-2.96855	0.00299213	0.0157757	864.706	715.343	1080.8	251.2	382.392	324.514	185.161	247.004	161.013	89.2622	28.7269	22.4633	526.9	721.3	595.211	723.41	362.439	285.241	303.743
WNT9A	165.809	-2.01093	0.251687	-7.98363	1.42e-15	3.62e-14	176.736	-1.6122	0.458771	-3.56807	0.000359615	0.00269748	52.1277	46.3778	19.7777	116.837	63.8721	81.4112	123.904	132.699	212.865	323.862	357.837	458.134	36.2976	40.4866	99.6222	118.213	39.4364	17.1456	13.0994
APCDD1	441.371	2.46335	0.31075	7.98286	1.43e-15	3.64e-14	449.264	-3.07058	0.361265	-8.49257	2.02e-17	1.53e-15	1197.91	973.934	489.79	519.926	580.732	608.323	154.533	316.639	286.549	53.7862	48.7108	65.6166	577.248	829.974	836.07	867.321	22.5351	135.606	102.339
C10orf90	47.2894	-3.20687	0.398872	-7.98024	1.46e-15	3.71e-14	41.3633	1.5698	0.842815	1.86531	0.0621374	0.169834	0	1.40539	1.1634	9.02834	24.3723	14.6992	18.0984	5.25541	17.7388	149.915	134.267	191.53	2.34178	0	0	0	1.87792	1.55869	4.09357
C16orf45	387.686	-1.10973	0.139057	-7.9799	1.46e-15	3.72e-14	547.189	-0.482311	0.266162	-1.81162	0.0700456	0.185683	241.218	217.835	248.967	318.647	227.755	209.182	470.559	472.987	578.557	616.825	517.084	532.618	519.875	584.924	856.246	863.466	743.658	364.734	406.082
FIBIN	4851.22	-2.15516	0.269832	-7.9785	1.48e-15	3.76e-14	14967.6	0.0394671	0.214837	0.204781	0.837743	0.924144	2278.29	1803.11	976.089	1687.77	1311.06	1397.56	9700.75	14874.1	10745.6	3682.64	3933.71	5823.92	32406.7	35369.3	27708.8	27962.4	24997	37990	32487.4
SUSD1	619.776	1.21972	0.152969	7.97642	1.51e-15	3.82e-14	463.883	1.38822	0.173488	8.00085	1.24e-15	7.61e-14	864.706	781.396	720.142	1013.83	890.848	902.308	215.789	287.734	332.943	429.145	476.492	521.977	296.235	194.975	192.939	197.878	553.988	657.768	531.345
TEAD2	969.896	-1.16739	0.146548	-7.96581	1.64e-15	4.16e-14	1245.83	-0.357512	0.172204	-2.07914	0.0376045	0.116937	775.782	571.993	509.568	642.074	574.009	496.383	1485.46	1374.29	1173.49	1590.7	1207.15	1237.85	1046.77	1310.49	1223.21	1371.01	1029.1	911.835	953.802
TMPRSS5	192.265	2.09587	0.262975	7.96549	1.65e-15	4.16e-14	115.982	-1.66687	0.32496	-5.11739	3.1e-07	5.08e-06	254.506	300.753	155.895	336.173	406.765	428.54	51.5109	85.4004	27.2904	120.161	68.0702	72.1192	50.3482	74.5805	70.6182	70.6706	31.9247	12.4695	18.8304
LIMK2	1681.85	0.81223	0.101987	7.96423	1.66e-15	4.2e-14	1155.4	-0.13651	0.159063	-0.860305	0.389621	0.596789	2656.47	2172.73	2180.2	1892.23	1941.38	2004.75	1278.03	1270.5	1596.49	1003.63	1114.1	1071.74	895.73	985.528	853.724	989.388	593.424	1073.94	867.018
AFF3	886.195	1.48938	0.187294	7.96268	1.68e-15	4.25e-14	815.453	0.0815489	0.29216	0.283295	0.77695	0.89105	1362.47	1536.09	1446.1	995.773	1105.16	1243.78	615.346	746.269	728.654	260.92	248.55	345.226	1319.59	1141.08	622.954	637.32	664.785	1075.5	1214.97
ST8SIA4	435.28	1.75084	0.21998	7.95965	1.73e-15	4.35e-14	223.242	-2.12046	0.410744	-5.19714	2.02e-07	3.47e-06	826.888	747.667	924.9	371.224	617.711	543.872	366.145	235.18	173.294	92.6954	162.994	160.79	80.7913	92.6929	160.152	97.6539	45.0702	7.79347	18.8304
PHF21B	102.819	2.20549	0.276859	7.95929	1.73e-15	4.36e-14	67.2398	-0.945836	0.417235	-2.26279	0.0236488	0.0816158	183.98	296.537	153.568	98.2496	169.765	116.463	32.0203	68.3204	36.8421	36.6204	23.7309	17.7342	76.1078	102.282	79.4455	77.0952	73.239	12.4695	43.3918
GSAP	77.4187	2.98059	0.373329	7.95906	1.73e-15	4.36e-14	49.504	1.60965	0.593733	2.69999	0.00693408	0.0312935	130.83	112.431	248.967	75.9443	152.957	110.81	11.1375	9.19697	43.6647	6.86632	14.9879	11.2317	10.538	6.39261	34.0481	11.5643	107.042	15.5869	32.7486
PRTG	353.851	1.68073	0.211462	7.95781	1.75e-15	4.4e-14	490.355	0.644473	0.237	2.72937	0.00634557	0.0291022	450.751	673.181	520.038	510.898	511.817	545.003	104.414	114.305	117.349	243.755	223.57	231.136	773.957	609.429	416.143	402.18	617.837	963.272	1012.75
BEND7	281.853	-1.33803	0.168288	-7.94893	1.88e-15	4.73e-14	200.782	-0.495115	0.36639	-1.36903	0.170988	0.348613	192.157	125.079	164.039	168.883	136.989	151.515	405.126	500.578	538.986	274.653	377.821	346.408	161.583	127.852	133.67	145.196	197.182	48.3195	58.1287
FGFR1	18164.9	-2.17199	0.273406	-7.94797	1.9e-15	4.75e-14	17046.2	-3.10609	0.227741	-13.6416	2.27e-42	1.43e-39	4366.46	4137.46	7237.49	7515.83	6819.19	6285.63	44749	46806	32408.7	14882.8	21377.8	21392.2	26302.8	28626.1	35649.6	37912.8	2401.86	4113.39	4445.62
CDH11	7334.2	-1.97362	0.248146	-7.94795	1.9e-15	4.75e-14	4381.34	-0.889393	0.336485	-2.65053	0.00803659	0.0351787	3714.35	3894.33	3046.93	2421.72	1785.9	1977.62	18009.3	14236.9	17135.7	3007.45	9412.43	9367.8	3636.78	3754.6	4745.29	4404.7	2850.69	1730.15	2022.22
MFAP3L	4342.19	2.94694	0.374262	7.94708	1.91e-15	4.78e-14	2038.13	2.01106	0.424131	4.74041	2.13e-06	2.93e-05	8580.62	9147.67	9820.23	4960.81	7073	6623.71	456.637	637.219	439.376	505.819	1614.33	2246.93	514.02	403.8	221.943	160.615	1076.05	1532.19	1509.71
SNX29	1511.38	1.03048	0.129659	7.94679	1.91e-15	4.79e-14	934.68	-0.342713	0.200813	-1.7104	0.0871919	0.217619	2298.73	2020.95	2941.07	1411.08	1779.17	1789.92	1131.85	1124.66	1017.93	795.349	925.505	900.307	826.647	613.691	895.338	632.18	446.946	582.951	713.919
SEPTIN3	71.66	-2.89274	0.362885	-7.94445	1.95e-15	4.87e-14	190.99	-0.0344602	0.354751	-0.0848722	0.932363	0.978198	12.2653	12.6485	10.4706	36.6444	11.7659	9.04569	87.7077	166.859	68.2261	129.316	108.663	206.308	242.374	288.733	353.091	219.721	200.938	289.917	317.661
RTN4RL1	339.699	2.35778	0.298738	7.94388	1.96e-15	4.89e-14	186.262	2.81518	0.312006	9.01593	1.95e-19	1.86e-17	558.073	437.076	736.43	425.925	537.03	639.983	172.631	212.844	200.585	45.7755	56.8293	53.2026	48.0064	42.6174	26.4818	37.2627	443.19	202.63	204.679
WI2-1896O14.1	719.034	2.25067	0.283108	7.94265	1.98e-15	4.93e-14	355.31	1.07214	0.421938	2.56589	0.0102912	0.0427753	1959.39	1784.84	1499.62	441.326	985.816	563.095	279.829	279.851	382.066	260.92	113.034	78.6217	305.602	402.735	378.312	262.124	923.939	587.627	685.264
KCNJ12	143.065	-2.20076	0.276862	-7.93859	2.04e-15	5.09e-14	113.262	0.496727	0.359862	1.37496	0.169144	0.346362	42.9287	49.1886	36.0653	60.0119	49.5849	50.882	135.042	134.013	227.875	147.626	370.952	412.616	39.8102	30.8976	58.0078	53.9666	63.8494	60.789	68.772
MKX	701.569	-1.80977	0.228037	-7.93526	2.1e-15	5.23e-14	645.502	2.05923	0.398904	5.13391	2.84e-07	4.71e-06	271.882	335.888	245.477	335.642	315.159	298.508	1365.73	1286.26	1371.34	474.921	939.869	1178.14	63.228	93.7583	97.1001	100.224	728.635	221.334	201.404
AP1AR	1204.7	1.97008	0.248676	7.93439	2.12e-15	5.26e-14	961.713	0.753775	0.231689	3.25276	0.00114291	0.00710605	1909.3	2035	1963.81	1529.51	2122.07	1912.03	279.829	331.091	399.805	367.348	859.933	746.611	654.527	616.887	580.078	576.929	1047.88	1042.77	996.375
CLDN7	52.9622	2.95248	0.370246	7.93013	2.19e-15	5.44e-14	25.6223	0.187886	0.633742	0.259718	0.795082	0.901665	141.051	98.3772	75.6208	63.7294	95.8082	94.9798	26.4515	5.25541	4.09356	9.1551	6.24498	14.7785	4.68356	8.52349	12.6104	8.99444	26.2909	1.55869	4.09357
RNF19B	2804.79	-1.15065	0.14504	-7.92678	2.25e-15	5.58e-14	2555.17	0.309177	0.116609	2.64801	0.00809683	0.0354102	589.758	521.399	573.554	2387.2	2859.96	2971.51	1438.13	871.084	1056.14	6492.11	6564.72	7331.92	867.629	901.359	952.085	985.533	1220.65	1066.15	1158.48
KAL1	576.16	1.71034	0.215785	7.9252	2.28e-15	5.64e-14	937.246	-1.1113	0.132079	-8.41448	3.95e-17	2.87e-15	1159.07	1370.25	587.515	740.324	781.593	681.819	214.397	400.725	316.569	195.69	246.052	219.904	1059.65	1186.9	1281.22	1278.49	467.603	573.599	614.035
PKD1L1	177.175	2.6467	0.334088	7.91455	2.48e-15	6.14e-14	137.041	0.685357	0.466947	1.45909	0.144541	0.310973	351.606	259.997	264.091	168.883	439.541	366.351	80.7468	15.7662	38.2066	67.5189	34.9719	38.4241	56.2027	20.2433	42.8754	42.4023	37.5585	87.2868	72.0468
SCARA3	1978.42	-1.49367	0.188766	-7.91373	2.5e-15	6.18e-14	5146.81	-0.182217	0.288024	-0.618609	0.536174	0.724828	920.922	833.395	909.776	1064.81	1138.77	1217.78	3256.32	3980.97	3501.36	1944.31	2567.31	2405.35	7253.66	8204.92	9677.22	10844.7	13564.2	4927.03	5321.64
SLC7A5	19499.7	1.75177	0.221998	7.90168	2.75e-15	6.8e-14	10891.9	1.3223	0.175484	7.53499	4.88e-14	2.49e-12	26568.8	21969	36493.4	28428.6	32379	32927.5	8013.42	4901.99	5170.17	9706.69	12721.6	14716.4	2801.94	2714.73	2124.85	2098.27	5263.82	6259.71	6831.35
SYDE2	426.374	1.44104	0.182441	7.89823	2.83e-15	6.98e-14	291.418	-0.743171	0.258115	-2.89343	0.00381063	0.019277	490.613	704.099	682.914	622.955	590.817	661.466	213.004	197.078	222.417	149.915	301.008	280.201	224.811	164.077	180.329	147.766	129.577	102.874	89.2398
CSMD1	73.5409	-3.39053	0.428334	-7.89754	2.84e-15	7.01e-14	198.643	-2.15064	0.606398	-3.54142	0.000397974	0.00293534	26.5749	4.21617	26.7581	5.31079	5.88296	3.39214	121.12	243.063	188.304	59.5082	39.3434	159.017	98.3547	120.394	374.529	484.415	99.53	28.0565	36.8421
FMNL1	49.6817	-2.4058	0.304564	-7.89662	2.87e-15	7.06e-14	59.6673	0.956901	0.345608	2.76104	0.00576172	0.0270272	2.04422	5.62155	4.65358	39.2998	21.0106	24.8757	38.9812	36.7879	40.9356	116.728	140.512	124.731	23.4178	15.9815	39.0922	32.123	45.0702	49.8782	64.6784
ETV1	293.377	-2.31446	0.293393	-7.89601	2.88e-15	7.09e-14	918.13	-1.07417	0.287457	-3.72445	0.000195745	0.00160126	40.8845	60.4317	102.379	132.77	126.063	122.117	538.776	437.513	427.095	224.3	675.082	633.112	1963.58	1852.79	1677.18	2108.55	959.619	737.262	987.369
GALNT10	6431.99	-1.99695	0.253351	-7.89429	2.92e-15	7.18e-14	4678.57	-1.12581	0.2044	-5.51024	3.58e-08	7.16e-07	1805.05	1668.2	2092.95	3675.07	3254.12	2720.49	12663.3	11985	13005.2	5670.44	9130.78	9513.23	4415.42	4897.81	5090.82	4912.25	1735.2	2461.18	2398.01
MCM7	800.582	-0.86745	0.109899	-7.89363	2.94e-15	7.21e-14	2353.92	-0.666194	0.129877	-5.12549	2.97e-07	4.88e-06	403.734	387.887	520.038	701.555	729.487	673.904	864.547	854.004	821.442	1078.01	1333.93	1238.44	3805.39	4020.95	4372.03	4625.71	2200.93	2747.98	2983.39
GIT1	1436.08	-0.619205	0.078452	-7.89262	2.96e-15	7.26e-14	1361.26	0.205241	0.105623	1.94034	0.0523379	0.150321	1035.4	931.772	966.782	1248.57	1235.42	1362.51	1580.13	1426.84	1404.09	2090.8	2058.97	1891.65	851.236	981.266	1005.05	1013.8	1248.82	1091.09	1002.11
DNAH11	130.591	1.95784	0.247965	7.8904	3.01e-15	7.38e-14	57.2897	-1.29688	0.66858	-2.01677	0.0437198	0.131278	179.892	265.618	115.176	176.849	235.318	281.547	62.6484	36.7879	45.0292	57.2194	41.8413	69.1634	29.2722	27.7013	10.0883	8.99444	0	20.263	0.818714
TCEAL5	65.2893	-2.31449	0.292972	-7.88867	3.05e-15	7.48e-14	264.366	-1.59451	0.262641	-6.05779	1.38e-09	3.66e-08	14.3096	22.4862	6.98038	21.7742	34.4573	28.2678	76.5702	101.167	79.1422	197.979	87.4297	112.908	517.533	581.728	556.119	672.013	146.478	218.217	204.679
C8orf31	159.894	1.1459	0.145276	7.88596	3.12e-15	7.63e-14	62.1683	3.50646	0.451284	7.53559	4.86e-14	2.49e-12	309.7	264.213	271.071	143.391	187.414	148.123	116.944	151.093	109.162	77.8183	71.8172	67.9812	3.51267	2.13087	6.3052	3.85476	78.8728	40.526	36.8421
NBEAL2	561	-1.55515	0.197436	-7.87519	3.4e-15	8.31e-14	472.737	0.265938	0.353169	0.725261	0.468292	0.669017	207.489	155.998	298.993	390.343	272.297	352.782	721.152	714.736	455.75	1131.8	1185.92	844.74	107.722	129.983	100.883	200.447	283.567	105.991	99.8831
CYTH2	2637.9	-0.977927	0.124194	-7.87442	3.42e-15	8.35e-14	2811.07	-0.0391246	0.155682	-0.25127	0.801606	0.904458	1464.69	1351.98	1606.65	2163.61	1974.99	2100.86	3314.79	2894.42	2804.09	5018.14	3615.84	3344.67	2883.9	3016.25	2707.45	3264.98	2458.2	3042.57	3158.6
ZMIZ2	1948.59	-1.41316	0.179461	-7.87177	3.5e-15	8.52e-14	1572.3	-0.25406	0.20645	-1.23854	0.215515	0.408042	1056.86	871.341	1242.51	1242.19	800.923	932.837	3825.73	3854.84	3348.53	2151.45	2103.31	1952.54	1069.02	888.573	1157.63	1230.95	1074.17	752.849	900.585
RP13-34L8.7	23.0827	4.87775	0.580568	7.86945	3.56e-15	8.68e-14	10.4188	0	1.18251	0	1	1	32.7076	25.297	20.9411	32.9269	105.053	54.2742	0	0	0	4.57755	0.624498	0.59114	0	0	0	0	0	0	0
HHEX	24.7172	-2.80465	0.352867	-7.86853	3.59e-15	8.73e-14	80.6685	0.624069	0.582129	1.06166	0.288391	0.49324	2.04422	1.40539	2.32679	12.2148	9.24465	6.78427	18.0984	22.3355	21.8323	51.4974	63.6987	85.1242	17.5633	60.7298	27.7429	52.6817	144.6	12.4695	33.5673
TMX1	3384.05	1.62296	0.206283	7.86785	3.61e-15	8.77e-14	2529.99	1.03695	0.26191	3.95992	7.5e-05	0.000695367	5122.82	4949.78	5373.73	3711.18	6283.84	5326.78	1518.87	1464.95	1622.42	954.419	2113.92	2165.94	1420.29	1348.84	1253.47	1219.39	3034.72	2726.15	2380.82
CD163L1	182.477	3.34499	0.426391	7.86593	3.66e-15	8.9e-14	87.455	-1.18641	0.873305	-1.8115	0.0700633	0.185696	244.285	282.483	485.136	438.671	310.956	248.757	9.7453	32.8463	9.55165	61.7969	8.74297	56.7495	0	5.32718	1.26104	3.85476	0	0	0.818714
BACE2	699.608	-1.48576	0.188999	-7.86025	3.83e-15	9.3e-14	791.221	-0.363341	0.229547	-1.59216	0.111348	0.259715	347.518	479.237	262.928	451.417	338.69	291.724	1052.49	1309.91	1162.57	1089.46	757.515	851.833	613.546	623.28	501.894	549.946	358.683	436.434	529.708
SEPTIN4	780.362	1.68911	0.214955	7.85983	3.85e-15	9.32e-14	436.866	0.163253	0.224162	0.713841	0.475325	0.674966	1555.65	1406.79	812.051	1099.86	1122.8	1152.2	368.929	542.621	402.534	424.568	241.056	235.274	151.045	169.404	137.453	149.051	125.821	187.043	192.398
PDGFA	2224.36	-0.971479	0.123647	-7.85717	3.93e-15	9.51e-14	1289.1	0.914103	0.194101	4.70359	2.56e-06	3.45e-05	1844.91	1492.52	1741.6	1440.29	1179.95	1322.93	3543.11	3008.72	2937.81	3280.96	2502.99	2396.48	415.666	564.681	513.243	611.622	1301.4	855.722	835.088
S100P	10351.3	4.20963	0.665961	7.85521	3.99e-15	9.65e-14	5497.05	0.323777	0.390645	0.829809	0.406647	0.612777	8207.55	6373.44	7862.23	19299.9	40180.6	36321.9	15.314	3.94156	28.6549	3480.08	1149.08	1293.42	264.621	391.015	271.124	308.381	591.546	246.274	331.579
PTGER3	237.835	2.46012	0.314955	7.85203	4.09e-15	9.89e-14	126.089	1.42592	0.48924	2.89859	0.00374847	0.0190281	455.862	479.237	517.711	163.041	394.999	359.566	77.9624	183.939	124.171	43.4867	26.8534	27.1925	18.7342	12.7852	26.4818	29.5531	116.431	26.4978	42.5731
GJD2	42.5494	5.22732	0.607697	7.85147	4.11e-15	9.92e-14	24.4804	1.67441	0.79398	2.08076	0.0374554	0.11663	75.6362	88.5395	9.30717	80.724	126.063	123.248	0	3.94156	1.36452	1.14439	0.624498	0	0	2.13087	3.78312	0	11.2675	6.23477	1.63743
DOCK8	275.609	1.14648	0.145941	7.85093	4.13e-15	9.96e-14	289.916	-0.831637	0.341832	-2.42722	0.0152149	0.0580426	596.913	619.776	487.463	209.245	215.148	193.352	225.534	203.647	227.875	123.594	114.908	89.8534	388.735	342.005	437.581	628.326	161.501	350.706	235.79
LGALS1	7761.01	-1.63205	0.208078	-7.84678	4.27e-15	1.03e-13	8139.89	-0.775284	0.276039	-2.82569	0.00471794	0.0229556	2935.5	2452.4	2297.71	5319.82	4875.29	5004.53	10802	6817.58	9064.51	22132.5	9589.16	11841.1	2984.6	4760.37	4643.15	6093.09	3184.96	2578.08	2252.28
FAM169A	223.281	2.77635	0.356878	7.84671	4.27e-15	1.03e-13	396.503	-0.388449	0.222067	-1.73631	0.0825087	0.209344	297.434	363.995	500.26	379.721	387.435	387.834	12.5297	30.2186	30.0195	53.7862	126.773	109.361	718.926	614.756	886.511	632.18	456.336	589.186	585.38
KIAA1211	1859.14	-2.2867	0.291575	-7.84057	4.49e-15	1.08e-13	1268.03	-1.73688	0.394426	-4.40467	1.06e-05	0.000124172	615.311	626.803	563.084	617.113	575.69	567.617	3452.62	4594.54	3476.8	744.996	3182.44	3292.65	1150.98	1472.43	2350.58	1982.63	630.982	356.941	523.977
TNS3	14544.1	-1.12658	0.143713	-7.83911	4.54e-15	1.09e-13	16597.2	-0.0796965	0.163687	-0.479428	0.631635	0.79699	8964.94	8193.41	11382.7	8061.24	8828.64	9220.96	23934.5	20104.6	17034.7	15267.3	21507.7	22028.3	26275.9	23369.3	24262.4	21991.4	17641.2	24694.4	25755.9
SYT13	1064.05	-1.75526	0.223939	-7.83831	4.57e-15	1.1e-13	645.86	-0.813938	0.237606	-3.4488	0.000563079	0.00391092	576.471	541.074	430.457	439.733	379.871	450.023	1371.3	1433.41	964.716	1435.06	2306.27	2440.23	159.241	172.601	166.457	113.073	78.8728	95.0803	84.3275
CADM2	87.7038	2.13974	0.272949	7.83628	4.64e-15	1.11e-13	1349.27	0.252348	0.362402	0.757669	0.448649	0.652177	157.405	134.917	100.052	116.837	179.851	169.607	26.4515	44.671	53.2163	17.1658	26.8534	25.419	4106.31	3507.41	2340.49	1644.7	2467.59	3990.25	4111.58
CRAT	1149.77	-0.895106	0.114279	-7.83261	4.78e-15	1.14e-13	951.962	0.055362	0.183988	0.297787	0.765866	0.885069	899.458	680.208	901.632	829.545	763.944	741.747	1606.58	1323.05	1469.59	1359.53	1609.95	1612.04	607.691	821.451	813.371	840.337	1000.93	752.849	655.79
FAM72A	168.729	1.7883	0.228072	7.83282	4.77e-15	1.14e-13	424.17	0.481979	0.151161	3.19721	0.00138765	0.00840213	145.14	155.998	205.921	357.416	417.69	314.338	48.7265	85.4004	72.3196	76.674	71.8172	73.3014	601.837	623.28	558.641	578.214	681.686	925.864	867.837
EPHA4	1878.25	1.32422	0.169241	7.83191	4.81e-15	1.15e-13	1564.16	-1.84499	0.208001	-8.86833	7.43e-19	6.65e-17	3109.26	3197.26	3561.16	1752.56	2188.46	2008.14	1580.13	1512.24	1732.94	448.6	751.895	696.364	2489.31	2743.5	2242.13	2591.68	559.621	776.229	742.573
GART	58.4854	-1.03556	0.76332	-7.82922	4.91e-15	1.17e-13	91.5909	-0.379433	1.1323	-0.255552	0.798297	0.902962	0	0	0	0	0	0	221.358	105.108	0	375.359	0	0	93.6711	270.621	79.4455	199.162	0	0	260.351
RP13-1039J1.4	194.808	2.68801	0.343536	7.82935	4.9e-15	1.17e-13	73.0091	1.36158	0.504377	2.68171	0.00732471	0.0326223	579.537	439.887	423.476	173.663	209.265	239.711	15.314	34.1602	58.6744	60.6525	42.4658	60.8875	7.02533	12.7852	2.52208	33.4079	24.413	38.9673	46.6667
FZD5	411.416	1.80022	0.230183	7.82476	5.09e-15	1.21e-13	350.729	-0.0936283	0.148587	-0.625614	0.531568	0.721638	617.355	681.613	962.129	534.265	552.158	509.951	164.278	136.641	128.265	162.503	257.293	230.545	389.906	411.258	389.661	417.599	398.12	372.528	362.69
TSKU	5002.63	0.969833	0.124013	7.82033	5.27e-15	1.25e-13	3387.97	0.795645	0.131942	6.02757	1.66e-09	4.32e-08	6162.31	5154.96	7051.34	6547.67	7231	7667.36	3415.03	3170.33	3897.07	3335.89	2945.13	3453.44	1826.59	1768.62	1312.74	1485.37	2912.66	2730.83	2697.66
RASD1	1534.63	2.43681	0.311698	7.81702	5.41e-15	1.29e-13	2601.83	1.09676	0.276798	3.95932	7.52e-05	0.000696526	87.9016	61.8371	289.686	4841.31	4814.78	5630.95	25.0593	26.2771	25.9259	1084.88	653.224	873.706	975.35	1346.71	1482.98	1852.85	4681.66	2105.79	2381.64
WNT16	1062.97	4.83777	0.656099	7.81635	5.44e-15	1.29e-13	296.056	-1.43609	0.525453	-2.79417	0.00520332	0.024878	2440.8	1918.35	4405.78	715.363	1727.91	1352.33	25.0593	9.19697	0	30.8985	41.2168	88.6711	18.7342	15.9815	44.1364	41.1174	9.38962	17.1456	4.91228
AKR1C3	88.7636	-2.63768	0.334855	-7.81323	5.57e-15	1.32e-13	65.4869	2.08749	0.607835	3.38071	0.000722983	0.00484218	12.2653	7.02694	12.7974	35.0512	25.2127	19.2221	48.7265	28.9048	39.5711	343.316	189.223	303.846	2.34178	2.13087	0	5.13968	22.5351	10.9108	5.731
FOXO6	124.191	-1.54838	0.198089	-7.81317	5.58e-15	1.32e-13	105.89	-0.741869	0.246582	-3.01219	0.0025937	0.0140493	77.6805	71.6748	89.5815	39.2998	47.9041	45.2285	258.947	299.558	184.21	167.081	108.038	101.085	120.602	115.067	129.887	96.369	73.239	56.1129	75.3217
PROKR2	40.7194	5.79637	0.639109	7.81235	5.61e-15	1.33e-13	8.97663	-1.92123	1.05099	-2.18724	0.0287252	0.0950255	104.255	84.3233	229.189	10.0905	36.9786	22.6142	0	0	0	0	0	1.18228	0	3.19631	1.26104	6.4246	0	0	0
KIF2C	316.129	-1.6897	0.216267	-7.81167	5.64e-15	1.34e-13	693.345	-0.500769	0.153882	-3.25243	0.00114424	0.00710991	125.72	82.9179	118.666	184.815	171.446	200.136	545.737	316.639	214.23	617.969	540.19	675.082	948.42	1028.14	949.563	950.84	600.936	716.999	730.293
SGCG	211.77	1.46708	0.187735	7.81149	5.65e-15	1.34e-13	119.805	-2.25295	0.538806	-4.07228	4.66e-05	0.000454288	213.621	268.429	239.66	355.823	405.924	398.011	75.178	93.2836	137.817	116.728	94.2991	142.465	11.7089	13.8507	17.6546	20.5587	0	3.11739	3.27486
NES	1220.07	1.70528	0.219129	7.80607	5.9e-15	1.39e-13	1529.69	-0.143605	0.207283	-0.715697	0.474179	0.674357	2181.19	2023.76	2412.88	1350	1532.09	1347.81	1110.96	1072.1	758.674	313.562	229.191	308.575	179.146	277.013	230.77	362.347	246.008	240.039	224.328
MPZL2	344.357	-1.78541	0.228754	-7.80351	6.02e-15	1.42e-13	743.763	-1.0616	0.264093	-4.00406	6.23e-05	0.000587129	108.344	133.512	107.032	146.047	240.361	178.653	437.146	332.405	451.656	351.327	798.108	847.696	1465.95	1642.9	1498.12	1517.49	647.884	829.225	709.825
CITED4	1401.3	-2.75859	0.350174	-7.80143	6.12e-15	1.44e-13	1343.56	1.35748	0.455803	2.95561	0.00312051	0.0163098	51.1056	53.4047	83.7645	275.63	604.264	462.461	380.067	250.946	271.54	9129.92	2792.75	2459.74	37.4684	85.2349	39.0922	57.8214	227.229	116.902	94.1521
CD68	3376.26	-1.5534	0.198711	-7.80066	6.16e-15	1.45e-13	2395.66	-1.27429	0.232826	-5.49351	3.94e-08	7.83e-07	942.387	862.908	974.926	2213.54	2155.68	1870.2	2404.3	1520.13	2056.33	10093.5	8114.72	7306.5	412.153	327.089	572.512	513.968	176.525	132.489	243.977
AQPEP	160.323	3.55653	0.456031	7.80034	6.17e-15	1.45e-13	70.3201	0.367083	0.755398	0.420769	0.673924	0.825636	192.157	129.296	765.515	158.262	205.904	339.214	36.1968	40.7294	20.4678	3.43316	25.6044	7.09369	0	17.047	3.78312	7.70952	13.1455	12.4695	3.27486
MYL3	492.735	1.69753	0.217771	7.79948	6.22e-15	1.46e-13	330.577	0.379548	0.231285	1.64553	0.0998612	0.240474	891.281	810.909	717.816	620.3	800.082	659.205	353.615	299.558	244.249	262.065	124.275	129.46	265.792	306.846	266.079	298.101	390.608	356.941	365.965
LPAR5	31.689	-2.87159	0.365497	-7.7955	6.42e-15	1.51e-13	25.5019	0.15301	0.52884	0.263589	0.792097	0.900086	7.15478	0	4.65358	11.1526	7.5638	11.3071	27.8437	47.2987	72.3196	62.9413	61.8253	66.2077	11.7089	6.39261	8.82728	21.8436	28.1689	9.35216	5.731
GPC1	16024.1	1.01564	0.130422	7.78849	6.78e-15	1.59e-13	14873	0.495386	0.155572	3.18857	0.0014298	0.00861649	21116.8	16150.7	21608.9	18946.2	24203.3	26180.5	7857.5	9001.21	9134.1	12458.9	12325.1	13305.4	11286.2	13357.4	12103.5	13244.9	22022.4	15968.8	14975.1
GFOD1	1421.7	1.99565	0.256734	7.78442	7e-15	1.64e-13	1177.95	2.61847	0.412315	6.36186	1.99e-10	6.11e-09	2627.85	3325.15	2596.7	1481.71	2103.58	1594.3	503.971	363.937	365.692	684.344	747.524	665.624	1008.13	505.017	213.116	197.878	2969	2440.91	4004.33
CDC25B	2356.56	-1.13605	0.145991	-7.78346	7.06e-15	1.65e-13	2208.37	-0.607414	0.152511	-3.98702	6.69e-05	0.000627029	1128.41	966.907	1248.32	1871.52	1740.52	1981.01	3408.07	2580.41	2292.4	4373.85	3402.89	3284.38	1622.85	1627.99	2083.24	2122.69	1141.78	1139.4	1374.62
RNF168	1004.38	-1.24013	0.159499	-7.7735	7.63e-15	1.79e-13	942.477	-0.346172	0.2033	-1.69706	0.0896847	0.222221	676.638	675.992	581.698	601.712	492.488	486.206	1956.02	1663.34	1601.95	783.905	1199.04	1333.61	1409.75	1142.15	1513.25	1435.26	935.206	1058.35	1243.63
NHLH2	23.7042	4.13461	0.504521	7.76858	7.94e-15	1.85e-13	20.9494	1.72564	0.946507	1.78829	0.0737287	0.192654	18.398	18.2701	25.5947	49.9214	76.4785	84.8034	5.56874	0	0	1.14439	2.49799	1.77342	0	1.06544	1.26104	0	9.38962	1.55869	0
HOPX	991.221	-2.21453	0.287676	-7.76469	8.18e-15	1.91e-13	653.933	-2.32556	0.416097	-5.57967	2.41e-08	4.99e-07	140.029	153.187	70.9672	689.34	668.976	806.198	831.135	1185.1	1102.53	2515.36	1891.6	1840.22	19.9051	42.6174	34.0481	48.8269	5.63377	14.0282	1.63743
MFGE8	30173.1	1.37888	0.177715	7.75789	8.64e-15	2.01e-13	17114	1.6078	0.216454	7.42012	1.17e-13	5.77e-12	33467	30152.6	43747.2	43880.9	56655.4	55242.1	19210.8	9919.59	15484.6	19239.4	16112	18965.6	2066.62	2504.84	2916.79	3357.49	11708.9	6674.32	6614.39
RNF185	2807.32	1.1399	0.146997	7.75529	8.81e-15	2.05e-13	1665.56	0.042171	0.099428	0.421781	0.673185	0.825173	4267.31	4254.11	4465.11	3048.39	3582.72	3605.84	1431.17	1445.24	1741.13	1831.02	2050.23	1965.54	1024.53	1095.27	1027.75	1102.46	1130.51	1130.05	1028.31
FAM89B	935.391	-1.65425	0.213501	-7.74872	9.28e-15	2.16e-13	1229.33	-0.471228	0.256468	-1.83748	0.0661396	0.177862	464.038	323.239	423.476	465.756	490.807	506.559	1283.6	1535.89	1612.86	2143.44	941.118	1033.9	1221.24	1665.28	1562.43	1638.27	1301.4	1024.06	957.895
PRC1	1402.08	-1.24233	0.160312	-7.74862	9.29e-15	2.16e-13	2689.16	-0.899089	0.243322	-3.68994	0.000224307	0.00179952	898.436	794.044	609.62	953.817	817.731	866.125	2205.22	1491.22	1333.14	2543.97	2187.61	2123.97	4599.25	4279.85	5161.44	4555.04	1312.67	2925.67	3190.53
CBX5	9077.89	-1.11282	0.143622	-7.74853	9.3e-15	2.16e-13	8193.56	-0.807965	0.185611	-4.34877	1.37e-05	0.000156707	6214.44	7156.24	6138.08	5484.98	4628.21	4789.7	13380.3	14691.5	12931.6	7753.22	12391.3	13375.1	13455.9	11405.5	14438.9	12872.3	5958.65	7888.55	8433.57
FAM63B	1617.28	1.92351	0.24831	7.74755	9.37e-15	2.17e-13	1234.28	0.368339	0.280996	1.31195	0.189537	0.374018	2567.54	3018.77	3728.68	1581.02	2298.56	2311.18	577.757	539.994	641.325	375.359	813.72	953.51	1225.92	813.993	1073.14	1011.23	1198.12	1359.18	1449.12
PRR14	680.826	-1.65977	0.214294	-7.74604	9.48e-15	2.2e-13	708.184	0.137409	0.284697	0.485325	0.627445	0.794114	406.8	328.861	358.326	363.789	232.797	255.541	995.413	1044.51	1038.4	1582.69	682.576	880.208	674.432	753.263	712.488	934.136	1046	751.29	745.848
TYMS	1141.79	-0.926157	0.119595	-7.74591	9.49e-15	2.2e-13	2627.84	-0.331348	0.146145	-2.26388	0.0235813	0.0814209	608.156	566.371	497.934	1003.74	1062.29	1056.09	1415.85	1078.67	1097.08	1841.32	1658.04	1815.98	3721.08	4199.95	3952.1	4412.41	2339.89	3729.95	3622.81
FAM43B	189.721	-2.53023	0.3273	-7.73943	9.99e-15	2.31e-13	144.509	-0.12328	0.394107	-0.325564	0.744754	0.872601	42.9287	47.7832	24.4313	93.4699	53.7871	59.9277	348.046	367.879	358.869	500.097	142.385	237.047	66.7407	115.067	83.2287	111.788	93.8962	74.8173	89.2398
RMND5B	631.585	-1.03971	0.134381	-7.73694	1.02e-14	2.35e-13	566.542	-1.02237	0.186795	-5.48356	4.17e-08	8.23e-07	340.363	285.294	396.718	543.293	456.349	450.023	602.817	786.998	749.122	1158.12	893.656	916.268	282.184	342.005	466.585	424.023	184.037	173.015	196.491
OR8B9P	21.4552	5.58434	0.655495	7.73436	1.04e-14	2.4e-13	3.58933	1.71771	1.17107	1.47516	0.14017	0.304529	58.2603	70.2694	73.294	10.0905	28.5744	15.83	0	0	0	1.14439	0	0	0	0	0	0	0	1.55869	2.45614
SLC22A23	533.305	1.67525	0.2168	7.73333	1.05e-14	2.42e-13	522.297	0.747003	0.200342	3.72798	0.000193024	0.00158252	560.117	579.02	973.763	698.9	973.21	1060.61	215.789	119.561	186.939	345.605	350.968	335.177	414.495	409.127	258.513	292.962	683.564	551.777	508.421
RP11-867G2.8	21.7242	5.689	0.676209	7.73026	1.07e-14	2.47e-13	6.6364	-0.332086	1.12323	-0.3326	0.739436	0.869509	63.3709	74.4856	15.1242	32.9269	42.8616	30.5292	1.39219	0	0	0	0	0	1.17089	1.06544	0	3.85476	0	0	2.45614
RAB34	2582.95	-1.13538	0.146921	-7.72903	1.08e-14	2.5e-13	2984.68	-0.58599	0.184406	-3.17787	0.00148361	0.00888073	1456.51	1179.12	1273.92	1941.09	1974.15	1925.6	3316.19	3077.04	3171.15	5210.4	3168.08	3302.11	2948.3	4327.8	3431.29	4317.33	2448.81	2454.94	2583.86
PPP1R9B	1879.42	-0.715133	0.0925488	-7.72714	1.1e-14	2.53e-13	1737.43	-0.325687	0.144652	-2.25504	0.0241306	0.0829279	1736.57	1477.06	1533.36	1364.34	1200.96	1223.43	2815	2297.93	2577.58	2071.34	2000.27	2255.2	1432	1276.39	1721.32	1760.34	1059.15	1246.95	1384.45
PLD2	934.167	-1.34663	0.174568	-7.71551	1.21e-14	2.77e-13	836.077	-1.16397	0.208506	-5.5876	2.3e-08	4.78e-07	527.409	386.482	417.659	691.996	497.53	642.244	1503.56	1317.79	1288.11	1689.12	1150.95	1097.16	882.85	806.535	936.953	895.589	294.834	413.054	456.842
MASP1	166.049	3.09133	0.399484	7.71567	1.2e-14	2.77e-13	102.54	3.45774	0.576936	5.94474	2.77e-09	6.89e-08	130.83	165.836	158.222	415.835	571.487	383.311	54.2952	15.7662	10.9162	51.4974	16.8614	17.7342	7.02533	4.26174	12.6104	6.4246	193.426	32.7326	69.5907
ANO8	480.501	-1.67533	0.217245	-7.71168	1.24e-14	2.85e-13	464.436	-1.55596	0.273324	-5.70227	1.18e-08	2.6e-07	214.643	189.727	209.411	310.681	213.467	217.097	917.45	834.297	593.567	407.402	788.116	870.159	367.659	412.324	522.071	534.526	169.013	138.724	153.1
MAPK8IP1	138.247	-1.25087	0.162333	-7.70577	1.3e-14	2.98e-13	268.746	-1.1538	0.222331	-5.19141	2.09e-07	3.57e-06	60.3046	66.0532	54.6796	116.306	92.4465	102.895	160.101	147.152	192.397	193.401	216.076	257.146	299.748	262.097	393.445	438.158	199.06	124.695	144.912
RNF128	28.6906	3.64214	0.461767	7.7047	1.31e-14	3e-13	17.8802	1.00124	0.774892	1.29611	0.194939	0.381029	35.7739	36.5401	93.0717	30.2715	55.4679	72.3656	5.56874	0	6.82261	1.14439	3.12249	4.13798	3.51267	4.26174	12.6104	7.70952	41.3143	1.55869	4.91228
STARD10	1112.25	-1.65982	0.2154	-7.70289	1.33e-14	3.04e-13	941.984	-0.439279	0.257601	-1.70547	0.0881073	0.219457	476.304	459.562	351.346	653.758	625.274	537.088	1311.44	1321.74	1056.14	3445.75	1512.53	1596.08	670.919	965.285	749.058	760.672	629.105	607.89	499.416
TRIP10	1953.33	-1.42545	0.185118	-7.70249	1.33e-14	3.05e-13	1655.73	-0.659241	0.172954	-3.81243	0.000137607	0.00118088	1001.67	888.205	751.554	1387.71	1158.94	1160.11	3587.66	2826.1	2831.38	3369.08	2196.36	2281.21	1605.29	2066.95	1794.46	2048.16	1083.56	1190.84	1282.11
RHOF	537.922	-1.21204	0.157403	-7.69904	1.37e-14	3.13e-13	287.731	-0.0565714	0.177668	-0.318317	0.750245	0.87559	400.668	434.265	355.999	285.72	261.371	182.045	1005.16	1153.56	742.299	492.087	593.897	547.987	259.937	274.882	258.513	230.001	244.13	274.33	222.69
TRIM58	268.405	2.05712	0.267156	7.69591	1.4e-14	3.2e-13	140.653	2.24245	0.477626	4.68641	2.78e-06	3.73e-05	488.569	430.049	713.162	254.918	398.36	342.606	89.0999	107.736	103.704	160.214	78.0622	54.3849	29.2722	27.7013	55.4858	33.4079	315.491	112.226	126.082
EFCAB4B	156.788	1.76281	0.229184	7.69322	1.43e-14	3.27e-13	75.7351	2.70524	0.402092	6.7013	2.07e-11	7.36e-10	212.599	216.43	354.836	229.426	232.797	210.312	51.5109	53.868	58.6744	114.439	76.8132	69.7546	18.7342	18.1124	11.3494	3.85476	142.722	73.2586	61.4036
CELF4	67.1603	1.98669	0.257713	7.68828	1.49e-14	3.4e-13	29.0731	0.895431	0.964857	0.918932	0.358131	0.566594	163.538	164.43	160.549	39.2998	80.6806	50.882	30.6281	28.9048	30.0195	22.8877	18.7349	15.3697	59.7153	0	0	0	20.6572	35.8499	40.117
ASB5	17.6051	3.72529	0.464884	7.6826	1.56e-14	3.55e-13	13.1446	0.869072	1.09177	0.687973	0.49147	0.688239	24.5307	19.6754	15.1242	45.6728	35.2978	59.9277	0	2.62771	0	1.14439	3.12249	4.13798	0	0	0	0	0	0	0.818714
MYO1B	2003.03	1.65046	0.214857	7.6789	1.6e-14	3.65e-13	1564.53	-0.365667	0.273266	-1.34894	0.177357	0.357799	3671.42	3724.28	4959.56	1681.4	2274.18	2096.34	1479.89	805.392	1311.3	408.546	743.777	880.208	869.97	808.666	1495.59	1302.91	950.23	690.501	949.708
SIGIRR	99.4988	-2.13335	0.277481	-7.67646	1.64e-14	3.71e-13	127.174	-1.77777	0.443107	-4.03673	5.42e-05	0.000519541	31.6854	33.7293	27.9215	37.7066	42.0211	35.0521	118.336	124.816	95.5165	359.338	132.393	155.47	44.4938	86.3003	85.7507	154.19	22.5351	28.0565	25.3801
CSGALNACT1	2995.01	2.0746	0.270227	7.67502	1.65e-14	3.75e-13	6727.22	0.90656	0.269346	3.38763	0.000704993	0.0047559	7344.89	7340.34	3207.48	3525.3	3886.95	4033.25	1073.38	1014.29	1634.7	468.055	1077.26	1334.2	10881.1	10433.8	8481.76	7420.41	16589.6	18737	17643.3
PDLIM1	648.521	2.42158	0.316707	7.66788	1.75e-14	3.96e-13	374.119	1.04137	0.448578	2.28294	0.0224342	0.0782942	1313.41	1139.77	1731.13	652.165	990.018	790.368	128.081	82.7727	193.762	339.883	199.215	221.678	33.9558	50.0755	56.7468	89.9444	253.52	52.9956	58.9474
LDB3	153.586	1.48613	0.193869	7.66724	1.76e-14	3.98e-13	73.6754	-0.774903	0.306925	-2.53843	0.0111352	0.0454295	278.014	296.537	219.882	214.025	182.372	157.169	86.3155	140.582	103.704	52.6418	45.5883	66.2077	36.2976	52.2064	66.8351	37.2627	26.2909	31.1739	26.1989
ACOX1	4420.43	1.73193	0.225754	7.66547	1.78e-14	4.03e-13	2066.58	0.459094	0.223374	2.05786	0.0396032	0.121533	9822.49	9163.13	9921.44	3606.03	4573.58	4587.3	1949.06	2028.59	2188.69	993.328	2074.58	2136.97	1615.83	1447.93	1599	1701.23	2386.84	2080.86	2115.56
ADCY5	729.702	1.65079	0.215445	7.66182	1.83e-14	4.14e-13	585.916	1.14436	0.23787	4.80809	1.52e-06	2.16e-05	1209.16	900.854	744.574	1608.64	1115.24	1103.58	290.967	310.069	504.873	280.375	299.134	388.971	314.969	255.705	245.903	260.839	647.884	671.797	483.86
PIEZO1	16904.6	-1.68647	0.220039	-7.66118	1.84e-14	4.16e-13	11601.8	0.905878	0.245592	3.6836	0.000229961	0.00183819	6361.62	5402.31	8733.62	9539.77	7255.37	8847.82	18754.1	17637.2	19973.9	51491.7	25301.5	23555.8	4600.42	4340.59	5360.68	4779.9	8929.53	8189.37	9851.58
MYBPH	34.7424	-3.99982	0.510715	-7.66032	1.85e-14	4.18e-13	39.106	-2.6139	0.94449	-3.21657	0.00129733	0.00792931	0	0	0	7.96618	7.5638	3.39214	16.7062	13.1385	15.0097	200.268	106.165	46.7001	2.34178	6.39261	15.1325	0	0	0	0
MAN2B2	4822.99	1.43416	0.187237	7.66028	1.86e-14	4.18e-13	2697.48	0.567348	0.164807	3.44236	0.000576662	0.00398905	7962.25	5894.2	11303.6	5442.49	5690.5	6001.82	2446.07	3087.55	4010.33	1579.25	2092.69	2365.15	1861.71	1837.88	1668.36	1747.49	3216.88	2478.32	2235.91
MAB21L1	105.9	2.31542	0.301101	7.65911	1.87e-14	4.22e-13	210.034	1.21788	0.287762	4.24578	2.18e-05	0.000234994	377.159	337.293	194.287	39.2998	89.0848	50.882	33.4125	43.3571	62.768	11.4439	19.9839	11.8228	240.032	271.686	150.064	182.459	437.556	519.045	538.714
CTNNA1	13754.7	-0.622575	0.0813317	-7.65477	1.94e-14	4.36e-13	10722.8	-0.209912	0.121757	-1.72591	0.0843628	0.212458	11257.5	9508.86	11098.8	11016.2	11071.7	10999.6	17703	15871.3	15734.3	18449.8	16499.8	15844.9	8047.52	8477.67	9726.4	9458.29	8518.26	6940.86	7686.09
MAGEL2	139.816	-1.67813	0.219226	-7.6522	1.98e-14	4.44e-13	364.477	-0.598064	0.207059	-2.87981	0.00397913	0.0199963	66.4372	47.7832	55.843	81.7861	74.7976	58.797	211.612	300.872	259.259	153.348	157.998	209.264	662.723	659.505	735.186	645.03	313.613	517.486	500.234
SLC38A5	652.972	-2.31152	0.302437	-7.6495	2.02e-14	4.53e-13	463.059	-0.255807	0.268827	-0.965229	0.33443	0.54244	114.476	130.701	247.803	191.719	302.552	296.247	1855.78	659.554	810.525	1232.51	728.164	1265.63	177.975	313.238	186.634	223.576	204.694	193.278	167.836
BMS1P10	561.815	-1.35673	0.177445	-7.6457	2.08e-14	4.66e-13	240.268	1.25356	0.292571	4.27706	1.89e-05	0.000208229	343.429	401.941	255.947	311.212	298.35	270.24	1035.79	802.764	654.97	1020.79	703.184	643.161	59.7153	56.4681	49.1806	25.6984	120.187	107.55	119.532
CPNE8	1376.12	1.79135	0.234558	7.64095	2.16e-14	4.83e-13	881.026	-0.539218	0.26706	-2.02306	0.0430666	0.12967	2199.58	2448.19	2426.84	1599.08	2031.3	2151.74	527.638	434.885	540.35	374.215	945.489	834.099	703.704	719.169	721.315	679.722	557.743	416.171	476.491
VWDE	28.2985	2.72235	0.353145	7.63861	2.2e-14	4.91e-13	55.3791	-1.36557	0.610576	-2.2242	0.0261348	0.0881666	28.6191	70.2694	68.6404	39.2998	54.6275	37.3135	6.96093	10.5108	5.45808	4.57755	5.62048	7.68483	38.6393	68.1879	134.931	110.503	78.8728	12.4695	7.36843
ABHD8	351.165	-1.29224	0.169168	-7.63756	2.21e-14	4.95e-13	558.886	-0.592333	0.201125	-2.93874	0.00329545	0.0170681	227.931	186.917	204.758	182.691	209.265	192.221	382.851	448.024	412.085	743.852	467.124	556.263	1017.5	1162.39	757.885	745.253	542.72	665.562	619.766
FOXP1	1369.43	-2.03126	0.265704	-7.63685	2.23e-14	4.97e-13	1307.99	-2.80662	0.353069	-7.95349	1.81e-15	1.1e-13	485.503	576.209	379.267	455.666	482.403	476.03	3231.26	3115.15	3553.21	750.718	1425.1	1502.68	1738.77	2120.22	2808.34	2686.77	574.645	183.926	203.86
CES1P1	121.399	3.56604	0.466322	7.63673	2.23e-14	4.97e-13	71.0706	1.23728	0.83231	1.46349	0.143334	0.309223	140.029	167.241	116.34	321.303	330.286	280.416	0	19.7078	1.36452	48.0643	24.3554	7.68483	8.19622	0	0	0	11.2675	1.55869	4.91228
PRICKLE4	485.066	-1.60208	0.209697	-7.63539	2.25e-14	5.02e-13	408.218	-1.39688	0.261315	-5.35069	8.76e-08	1.63e-06	242.24	205.187	239.66	212.963	187.414	267.979	893.783	1182.47	931.968	582.493	449.014	425.621	326.678	544.438	481.717	664.303	230.985	135.606	200.585
LYPD6	67.2691	2.09221	0.273722	7.63167	2.32e-14	5.16e-13	133.364	0.153803	0.18535	0.833549	0.404535	0.611058	161.494	119.458	51.1894	113.12	104.212	109.679	22.275	24.9632	20.4678	25.1765	26.2289	28.9659	161.583	184.32	160.152	161.9	138.966	188.602	222.69
CCDC129	22.0103	-4.5891	0.551226	-7.62447	2.45e-14	5.45e-13	11.2972	-2.96296	1.07168	-2.76546	0.00568424	0.0267424	2.04422	1.40539	2.32679	0.531079	0	1.13071	27.8437	24.9632	73.6841	32.0429	66.8212	31.3304	2.34178	0	5.04416	43.6873	1.87792	0	0
KCNA2	28.2165	4.45833	0.548627	7.621	2.52e-14	5.59e-13	65.1982	1.59103	0.41138	3.9001	9.62e-05	0.000865939	132.875	59.0263	30.2483	16.4634	52.1062	38.4442	0	3.94156	1.36452	2.28877	1.249	0.59114	105.38	63.9261	63.052	44.9722	238.496	207.306	208.772
COL4A2	16051.9	-1.56497	0.205416	-7.61864	2.56e-14	5.69e-13	19535.1	-0.691267	0.20145	-3.43848	0.000584987	0.00403903	7055.63	6377.65	7877.36	10572.2	6965.42	8172.79	32962.8	27316.3	31203.9	16969	16171.4	20979	16521.2	17468.9	15765.5	16687.2	9305.11	11127.5	10292
SOX8	3457.65	1.18905	0.156158	7.61429	2.65e-14	5.88e-13	6677.27	0.616264	0.159079	3.88529	0.000102209	0.000912637	6206.26	5079.07	3855.5	4704.83	4418.1	4646.1	2313.81	2228.29	1750.68	2590.89	1684.89	2013.42	10306.2	11524.8	8257.29	8427.79	13921.1	16000	14501.9
PAOX	132.113	-1.5815	0.207706	-7.61213	2.7e-14	5.98e-13	103.076	0.42065	0.272869	1.53503	0.124776	0.28113	78.7026	39.3509	53.5162	80.1929	63.0317	75.7577	187.945	225.983	177.388	264.353	173.61	165.519	65.5698	59.6644	69.3572	56.5365	52.5819	95.0803	100.702
CTSB	17546.2	-0.69359	0.0911295	-7.61013	2.74e-14	6.06e-13	13567	0.284346	0.0973944	2.91737	0.00352998	0.0180813	9057.95	7962.93	9415.37	16510.7	19019.6	17532.8	13572.4	12421.2	14712.3	31466.1	27928.2	30955.1	6730.27	7377.08	6143.79	6628.9	8629.06	8424.74	7514.98
TTC22	130.098	1.59615	0.20969	7.60629	2.82e-14	6.24e-13	95.942	0.0596365	0.232793	0.272369	0.785338	0.895831	254.506	223.457	274.562	119.493	160.521	157.169	58.4718	81.4589	50.4873	68.6632	45.5883	66.7989	110.064	139.572	136.192	91.2293	144.6	121.578	111.345
ANGPTL6	309.691	-3.88847	0.517801	-7.60522	2.84e-14	6.29e-13	883.143	-5.08196	0.488681	-10.3687	3.44e-25	5.93e-23	8.17689	9.83772	19.7777	23.3675	33.6169	11.3071	1328.15	1170.64	736.841	172.803	81.1847	120.593	748.198	1169.85	1551.08	2070.01	75.117	9.35216	21.2866
C4orf32	254.95	2.83646	0.374877	7.60173	2.92e-14	6.45e-13	207.665	1.83197	0.205141	8.92434	4.48e-19	4.08e-17	417.021	414.589	888.835	313.868	352.978	326.776	34.8047	14.4524	58.6744	61.7969	78.0622	97.5382	72.5951	54.3372	51.7026	82.2348	255.398	229.128	219.415
GABARAPL1	5058.66	0.904835	0.119113	7.59641	3.04e-14	6.72e-13	4641.62	0.0340898	0.126669	0.269987	0.78717	0.896892	4178.39	3429.15	3203.99	8916.28	10327.1	9587.31	2124.48	1550.35	2115.01	5431.26	4701.22	5139.38	3142.66	3536.18	3134.95	3665.88	4152.09	3026.98	3183.16
SSBP4	878.469	-1.51775	0.199837	-7.59506	3.08e-14	6.78e-13	1260.59	-0.798848	0.2571	-3.10869	0.00187921	0.0107552	578.515	467.994	501.424	482.219	279.861	395.749	1570.39	1542.46	1236.26	1676.53	833.08	977.155	1345.35	1714.29	1517.03	1850.28	946.474	936.774	869.474
STON1	1891.82	1.83153	0.241239	7.59181	3.15e-14	6.95e-13	1315.02	0.656178	0.272775	2.41003	0.0159512	0.0603087	3267.69	3739.74	3381.99	2147.15	2850.71	2437.82	1283.6	931.522	624.951	326.15	836.827	873.706	1101.81	1027.08	1190.42	1013.8	1802.81	1497.9	1855.21
HJURP	478.054	-1.49162	0.196858	-7.57709	3.53e-14	7.77e-13	962.574	-0.829839	0.232771	-3.5572	0.000374824	0.00279546	214.643	227.673	172.183	279.347	299.19	301.9	917.45	466.418	421.637	756.44	758.765	920.997	1756.33	1703.63	1774.28	1937.66	527.697	1181.49	1296.02
COL9A3	112555	1.5266	0.201453	7.57602	3.56e-14	7.82e-13	258365	0.566955	0.213253	2.68245	0.00730857	0.0325702	154339	128143	103917	231452	161758	234045	43256.6	66043.4	54207	69989.6	41981.8	61528.3	374898	447769	334068	353912	604513	574469	510711
NUDT16	1856.11	0.756383	0.0998437	7.57554	3.58e-14	7.85e-13	1298.52	0.115354	0.153621	0.750307	0.45307	0.655357	2500.08	2309.05	2784.01	2218.85	2052.31	2143.83	1275.24	1437.36	1675.63	1325.2	1190.92	1360.81	1100.63	1334.99	878.945	1142.29	1353.98	1134.73	1138.83
EBF4	403.516	-1.73984	0.229773	-7.57059	3.72e-14	8.14e-13	354.029	-1.39435	0.237435	-5.87134	4.32e-09	1.03e-07	232.019	154.593	144.261	180.567	156.319	218.227	921.627	767.29	466.666	717.531	474.618	408.478	504.653	436.829	510.721	533.242	157.746	174.574	224.328
HCN2	63.8957	1.78098	0.234982	7.57051	3.72e-14	8.14e-13	70.3682	0.695897	0.31527	2.22004	0.0264158	0.0887611	75.6362	77.2963	145.425	86.0348	94.1273	118.725	25.0593	26.2771	31.384	30.8985	28.1024	27.7836	96.0129	84.1694	59.2689	60.3912	63.8494	141.841	158.831
RAP1GAP2	1253.58	-1.76616	0.233494	-7.56906	3.76e-14	8.23e-13	1065.1	-0.406786	0.201269	-2.0175	0.0436429	0.131104	929.099	635.235	638.705	401.496	410.967	429.671	3256.32	2011.51	1162.57	1512.88	1651.17	2003.38	1145.13	1148.54	1341.75	1413.41	736.146	996.005	1113.45
TGFB2	1040.73	2.00609	0.265078	7.56635	3.84e-14	8.39e-13	940.605	1.70486	0.327735	5.19809	2.01e-07	3.46e-06	2187.32	2985.04	1308.82	857.692	1491.75	1249.44	423.225	621.452	483.04	146.482	337.229	397.246	530.413	597.709	315.26	468.996	1402.81	1720.8	1657.08
UAP1	7948.71	1.0323	0.136597	7.55759	4.11e-14	8.97e-13	7882.26	0.308546	0.223769	1.37906	0.167878	0.344667	4262.2	4195.08	5044.49	13468.2	18988.5	18158.1	2468.35	1936.62	2142.3	6648.89	9142.02	8929.77	5136.69	5579.69	5466.61	6117.5	6730.48	6950.21	7072.05
HK1	8362.89	-1.11939	0.14815	-7.55614	4.15e-14	9.06e-13	6497.36	0.312509	0.178696	1.74936	0.0802295	0.204952	3944.33	3578.12	4303.4	6694.78	6564.54	6509.51	10051.6	7563.85	8664.71	9808.55	15586.2	17085.1	4457.57	4704.96	4506.96	4529.34	4629.08	6314.27	6024.92
RASEF	1452.12	1.00729	0.133362	7.55315	4.25e-14	9.26e-13	1071.67	-0.641128	0.224015	-2.86	0.00423638	0.0210302	1728.39	1654.14	2004.53	1899.14	2132.15	2228.63	753.173	961.74	870.564	817.093	1262.73	1113.12	1142.79	717.038	1170.24	756.818	469.481	572.04	766.316
SH3BGR	222.826	1.89693	0.251438	7.55064	4.33e-14	9.43e-13	137.478	0.226767	0.35686	0.633618	0.52633	0.717593	450.751	383.671	283.869	225.177	423.573	341.475	61.2562	73.5758	68.2261	159.07	98.0461	105.223	101.867	73.5151	70.6182	168.324	95.7741	168.339	100.702
ZNF444P1	13.6702	5.385	0.681977	7.55045	4.34e-14	9.44e-13	3.51539	2.07837	1.05665	1.90807	0.056382	0.158323	41.9066	47.7832	45.3725	9.55942	9.24465	10.1764	0	0	0	0	0	0	3.51267	0	0	0	15.0234	1.55869	2.45614
SAMD11	1525.02	2.41971	0.322222	7.54915	4.38e-14	9.53e-13	1240.79	1.3374	0.212851	6.28608	3.26e-10	9.61e-09	2573.68	1817.17	1568.26	3668.69	2854.92	2956.81	782.409	798.823	429.824	359.338	238.558	251.826	553.83	712.777	500.633	524.247	1303.28	1647.54	1427.84
RP11-802E16.3	100.981	-2.59729	0.344056	-7.54609	4.49e-14	9.74e-13	51.5288	-0.890176	0.542654	-1.69722	0.0896545	0.222221	20.4422	26.7024	13.9608	45.1417	17.6489	38.4442	246.417	193.136	110.526	264.353	138.638	96.3559	12.8798	12.7852	22.6987	28.2682	5.63377	17.1456	6.54971
NUF2	177.372	-1.48764	0.197042	-7.54593	4.49e-14	9.75e-13	500.276	-0.663301	0.178617	-3.70761	0.000209222	0.0016964	70.5257	75.891	73.294	101.436	107.574	117.594	261.731	173.429	118.713	295.252	365.331	367.689	875.825	892.835	803.283	944.416	371.829	611.008	669.708
NPDC1	1000.69	-1.98864	0.263522	-7.54422	4.55e-14	9.87e-13	876.356	-2.16903	0.496586	-4.40605	1.05e-05	0.000123513	385.336	302.158	615.437	400.433	227.755	394.618	1690.11	2219.1	1919.88	2058.75	786.242	1008.49	408.64	656.308	755.363	1115.31	323.003	49.8782	79.4153
CDC5L	2554.5	0.773224	0.102498	7.54361	4.57e-14	9.9e-13	2321.84	0.320084	0.123499	2.59058	0.00958134	0.0404501	2926.3	2685.7	2958.52	3319.77	3820.56	3666.9	1819.59	1589.76	1773.88	1689.12	2146.4	2257.57	1830.1	1626.92	1800.77	1792.46	1962.43	2439.35	2199.07
SEPTIN6	2114.8	-1.73633	0.230185	-7.54232	4.62e-14	9.99e-13	3038.27	0.197889	0.193308	1.02704	0.304402	0.510952	1114.1	952.853	631.724	1251.22	817.731	874.04	5041.11	3958.64	3132.94	1873.36	2698.45	3031.37	3484.57	3904.82	3650.71	4037.22	4572.74	4241.2	4175.44
MTMR2	3695.71	1.33503	0.17702	7.54176	4.64e-14	1e-12	2562.8	0.317321	0.213636	1.48237	0.138243	0.301782	5118.73	5497.88	5520.32	4813.7	5427.45	5465.86	2103.59	1894.58	1952.63	1256.54	2579.8	2717.47	1659.15	1620.53	1520.81	1621.57	2099.52	1974.86	1936.26
NSMCE4A	457.107	-1.13679	0.150787	-7.53912	4.73e-14	1.02e-12	522.621	-0.693735	0.175483	-3.95831	7.55e-05	0.000698596	210.555	274.051	283.869	295.28	293.308	355.044	523.462	712.108	577.192	794.205	617.628	548.578	495.286	482.642	447.669	570.504	330.515	264.978	325.848
LIFR	5777.72	2.50713	0.333227	7.5344	4.91e-14	1.06e-12	3554.88	1.36139	0.339732	4.00885	6.1e-05	0.000576562	12175.4	14766.4	9764.38	6921.55	8139.49	7901.41	1582.92	839.552	1513.25	621.402	2180.75	2926.15	1834.78	1887.95	1727.62	1711.51	4657.25	4629.32	4794.39
CHST15	648.251	2.84714	0.386149	7.52496	5.27e-14	1.14e-12	442.834	2.4089	0.419107	5.73234	9.91e-09	2.22e-07	1087.53	1231.12	1549.64	815.206	911.018	1024.42	366.145	239.121	409.356	22.8878	36.8454	85.7154	60.8862	73.5151	88.2728	116.928	773.705	317.973	332.398
ZNF528	259.271	1.83078	0.243214	7.52333	5.34e-14	1.15e-12	580.117	-0.320727	0.181437	-1.75814	0.0787244	0.202142	445.64	577.615	615.437	272.443	320.201	243.103	69.6093	122.188	107.797	88.1178	126.148	122.957	1306.71	1017.49	1119.8	913.578	792.484	883.779	937.428
GTF2F2	1197.71	0.868907	0.115532	7.5216	5.41e-14	1.16e-12	1315	0.911804	0.138599	6.58181	4.65e-11	1.58e-09	1647.64	1512.2	1361.17	1444.53	1646.39	1657.62	659.896	729.188	800.974	1059.7	894.905	958.239	1121.71	1331.8	1070.62	1212.96	2608.44	2218.02	1886.32
FMNL3	4126.41	-1.24144	0.165015	-7.52141	5.42e-14	1.17e-12	1944.91	-0.767591	0.191528	-4.01863	5.85e-05	0.000556735	3227.83	3535.96	2934.09	1569.34	1550.58	1615.79	9922.11	7926.48	6557.89	2391.77	4232.22	4052.86	1162.69	935.453	1283.74	1211.68	569.011	718.558	722.106
SLC48A1	404.058	-0.881233	0.117246	-7.51569	5.66e-14	1.22e-12	337.877	-1.6658	0.16854	-9.88213	4.98e-23	6.74e-21	271.882	321.834	304.81	278.285	279.02	243.103	509.54	683.203	536.257	447.455	503.345	469.957	402.786	350.528	465.324	508.828	116.431	124.695	157.193
FANCE	694.009	0.891972	0.118657	7.5156	5.66e-14	1.22e-12	625.636	-0.311664	0.154779	-2.01991	0.0433929	0.130457	551.94	590.263	574.718	1365.4	1294.25	1090.01	374.498	345.543	304.288	678.622	607.636	550.943	334.874	425.109	361.918	449.722	326.759	349.147	277.544
RNF144A	3046.13	1.55983	0.207799	7.50502	6.14e-14	1.32e-12	2854.84	0.281427	0.268931	1.05747	0.290298	0.49535	4794.72	5541.45	6150.88	3035.65	3900.4	4071.69	1930.96	1684.36	1473.68	698.076	1589.35	1682.39	4134.41	3790.82	3741.51	2878.22	4976.5	4083.78	4260.59
CAMKK1	1719.05	-2.07404	0.27734	-7.50219	6.28e-14	1.35e-12	978.082	-1.17502	0.227044	-5.18627	2.15e-07	3.65e-06	453.817	410.373	382.757	1159.34	808.487	829.942	3814.59	3292.52	2132.75	3172.24	2214.47	1957.27	434.4	543.372	624.215	705.421	246.008	258.743	253.801
MXD4	4859	0.938131	0.125094	7.49928	6.42e-14	1.37e-12	4083.09	0.548143	0.119071	4.60556	4.11e-06	5.31e-05	8397.67	6383.27	7281.7	5026.13	5562.76	5723.66	2998.77	3913.97	4448.34	3132.19	2653.49	2786.05	3763.24	4348.04	3399.76	3429.45	6174.61	5332.29	4909.01
CILP2	20994	-3.52444	0.482965	-7.4911	6.83e-14	1.46e-12	8809.98	0.182777	0.34824	0.520243	0.602894	0.776354	1393.14	1329.5	743.41	4161	2204.43	2594.98	70941.6	75237.8	56428.4	12931.6	8450.7	15510.9	5267.83	7311.02	7017.69	8718.18	13237.5	5500.63	5410.06
CLK2	1290.92	-0.7929	0.105894	-7.48715	7.04e-14	1.5e-12	48.6482	-0.557887	0.793066	-0.621374	0.534354	0.723698	1085.48	987.988	1010.99	866.721	892.529	775.668	1957.41	1907.71	1919.88	1591.84	1308.95	1185.83	43.3229	150.226	119.799	87.3745	71.3611	20.263	111.345
AC007246.3	311.572	1.36323	0.182326	7.48549	7.13e-14	1.52e-12	134.934	1.33835	0.216933	6.16814	6.91e-10	1.93e-08	546.83	749.072	494.443	276.692	315.999	252.149	310.457	269.34	257.894	111.006	79.3112	75.666	62.0571	82.0386	56.7468	66.8158	169.013	202.63	144.912
PENK	74070.3	-3.20721	0.429655	-7.4845	7.18e-14	1.53e-12	8764.39	-0.0686676	0.231885	-0.300491	0.763803	0.884112	7463.46	7504.77	6795.4	10483	7979.81	8998.2	264322	283339	196994	41567.6	24833.8	28562.1	1100.63	1754.77	1428.76	1856.71	1861.02	1295.27	1234.62
CREB3L1	1265.95	-1.81528	0.242214	-7.48108	7.37e-14	1.57e-12	998.391	-0.49215	0.197859	-2.48821	0.0128386	0.0507696	510.034	442.697	673.606	432.829	456.349	413.841	3481.86	2727.56	3096.1	1070	778.124	1108.39	1309.05	1232.71	1191.68	1056.2	753.048	760.642	1028.31
CROCC	1248.35	-1.28126	0.171349	-7.4773	7.59e-14	1.62e-12	1379.65	-0.277038	0.202289	-1.3713	0.170281	0.347851	713.434	820.747	651.502	928.326	487.445	734.963	1804.27	1878.81	1772.51	2173.19	1485.68	1529.28	1335.98	1295.57	1446.41	1489.22	1196.24	1207.99	1038.13
BCHE	25.4189	3.17628	0.418498	7.46656	8.23e-14	1.75e-12	162.087	0.240136	0.552268	0.395167	0.692719	0.838957	53.1498	44.9724	30.2483	30.2715	68.0742	52.0127	0	3.94156	8.18713	4.57755	2.49799	7.09369	12.8798	8.52349	17.6546	50.1119	22.5351	21.8217	32.7486
TYRO3	2371.37	1.26365	0.169463	7.46524	8.31e-14	1.77e-12	2500.11	0.938312	0.141659	6.62563	3.46e-11	1.2e-09	2843.51	3027.21	3094.63	3431.83	3588.6	3734.74	984.275	808.02	919.687	2197.22	1907.22	1919.43	2070.13	2426	1726.36	1562.46	3502.33	3977.78	3739.89
RP11-474D14.2	60.5815	2.04919	0.27367	7.46362	8.42e-14	1.79e-12	10.3637	0.169157	0.687094	0.234407	0.814669	0.911685	156.383	202.376	147.751	33.989	25.2127	31.6599	34.8047	40.7294	32.7485	0	11.8654	9.45825	7.02533	4.26174	3.78312	5.13968	5.63377	4.67608	6.54971
TRDN	24.4498	5.56362	0.640265	7.46344	8.43e-14	1.79e-12	8.51566	-1.7849	1.13658	-1.76768	0.0771151	0.199306	71.5478	54.8101	54.6796	61.6051	34.4573	13.5685	0	0	2.72904	0	0	0	0	5.32718	0	3.85476	0	0	0
CNTN4	194.788	2.46301	0.330351	7.46186	8.53e-14	1.81e-12	353.474	-1.91504	0.348095	-5.50468	3.7e-08	7.37e-07	293.346	349.942	190.797	458.321	347.095	353.913	119.728	48.6126	43.6647	58.3638	51.2088	22.4633	590.128	424.043	467.846	370.057	184.037	88.8455	87.6024
TMEM150C	164.523	1.72609	0.231645	7.46026	8.64e-14	1.83e-12	90.4553	0.643831	0.412998	1.52413	0.127476	0.285035	254.506	268.429	381.594	186.94	225.233	177.522	87.7077	147.151	115.984	28.6097	46.2128	54.3849	8.19622	15.9815	23.9598	8.99444	35.6806	14.0282	19.6491
KLHDC7A	16.2559	5.46781	0.662683	7.45765	8.81e-14	1.86e-12	7.21865	0	0.992204	0	1	1	18.398	19.6754	38.3921	23.8985	50.4254	42.9671	0	1.31385	0	0	0	0	0	0	0	0	0	0	0
KIAA1549	1871.37	-1.67528	0.224702	-7.45446	9.02e-14	1.91e-12	1506.35	-0.420003	0.292226	-1.43847	0.150301	0.319634	966.917	844.638	643.358	940.009	860.593	980.327	2430.76	2740.7	2132.75	1598.71	4067.35	4250.3	1293.83	957.827	1706.19	1374.86	801.874	1059.91	1110.99
C17orf47	23.2285	3.06087	0.412885	7.45251	9.16e-14	1.94e-12	20.5866	0.287397	0.649345	0.445325	0.656085	0.813596	1.02211	2.81078	3.49019	70.6335	91.6061	84.8034	0	0	0	6.86632	6.86947	10.6405	15.2216	8.52349	5.04416	7.70952	0	9.35216	22.1053
WFDC2	63.2922	2.11821	0.28391	7.44872	9.42e-14	1.99e-12	161.476	-2.42399	0.305648	-7.89382	2.93e-15	1.72e-13	76.6583	70.2694	37.2287	123.21	183.212	130.032	13.9219	15.7662	10.9162	49.2087	22.4819	26.6013	283.355	515.671	493.067	560.225	97.6521	68.5825	87.6024
NKD1	629.222	1.5976	0.214697	7.44365	9.79e-14	2.07e-12	718.978	0.644847	0.247094	2.62202	0.00874093	0.0376445	1408.47	1406.79	835.318	622.424	674.019	718.002	417.656	537.366	332.943	119.016	229.191	249.461	866.458	904.555	1088.28	778.661	1346.47	1794.06	1157.66
PTGFRN	1703.48	-1.83271	0.24643	-7.44008	1.01e-13	2.12e-12	3611.24	-0.188414	0.321163	-0.587934	0.556577	0.741586	1002.69	778.585	832.992	809.364	434.499	581.186	3053.06	2391.21	2521.63	4162.14	1516.9	2357.47	3551.31	3949.57	3349.32	3786.66	2476.98	4345.64	2785.26
HCAR2	26.1723	4.32968	0.571616	7.43732	1.03e-13	2.16e-12	22.9804	-0.25785	0.735485	-0.339016	0.734598	0.866908	3.06633	0	2.32679	51.5146	131.946	118.725	0	0	0	3.43316	1.87349	1.18228	19.9051	9.58892	5.04416	6.4246	0	6.23477	17.193
LINC00517	21.8906	-3.67038	0.474992	-7.43671	1.03e-13	2.17e-12	5.34668	-0.179698	1.14017	-0.311946	0.755082	0.878862	3.06633	1.40539	1.1634	4.24863	1.68084	0	68.2171	61.7511	61.4034	16.0214	21.8574	21.8722	0	0	0	1.28492	0	0	0
SAT1	30101.6	2.3702	0.323399	7.43352	1.06e-13	2.22e-12	17267.9	0.314843	0.236166	1.3216	0.186302	0.36972	36151.1	34637.2	42964.2	50339.9	59760.8	64997.8	4080.5	3031.06	2950.09	29908.6	17737.6	14660.3	2823.01	3332.68	2472.9	3144.2	4120.16	3159.47	3707.14
PLAUR	3213.98	-1.57178	0.211719	-7.43215	1.07e-13	2.24e-12	2449.55	0.583075	0.235647	2.45165	0.0142204	0.0551067	237.13	186.917	350.182	2601.75	3563.39	2981.69	1172.22	612.255	706.822	10906	7973.58	7275.76	118.26	135.31	117.277	156.76	287.322	149.635	162.105
AP000695.4	19.4478	-3.85831	0.497981	-7.42745	1.11e-13	2.32e-12	11.1009	-0.203659	1.11274	-0.336464	0.736521	0.868023	0	1.40539	0	3.71755	4.20211	2.26142	32.0203	7.88312	24.5614	64.0857	41.2168	52.0204	0	1.06544	0	0	0	0	0
KIAA1211L	190.334	-2.26137	0.30421	-7.42694	1.11e-13	2.33e-12	242.423	0.722969	0.334285	2.17096	0.0299342	0.0980433	55.194	57.6209	52.3528	81.7861	54.6275	49.7513	335.517	312.697	686.354	247.188	139.887	211.037	268.134	356.921	204.288	230.001	567.133	411.495	352.047
RP11-779O18.2	60.1562	2.66073	0.363655	7.4268	1.11e-13	2.33e-12	61.5755	-0.162126	0.434643	-0.406681	0.684243	0.832993	1.02211	0	3.49019	233.144	213.467	185.437	0	0	1.36452	40.0536	24.9799	18.9165	9.36711	23.4396	12.6104	29.5531	28.1689	12.4695	11.462
MST4	19552.4	1.72287	0.232112	7.42339	1.14e-13	2.39e-12	14541.5	0.530216	0.26447	2.01153	0.0442694	0.13246	30925	31605.8	29154.7	27342.6	31116.7	30667.2	7879.77	9235.07	12456.7	3667.76	10036.3	10541.8	9902.21	10350.7	10102.2	10670	16168.9	14767.1	13759.3
CTHRC1	3555.93	-2.58098	0.348564	-7.41749	1.19e-13	2.5e-12	7984.61	0.372505	0.181684	2.06522	0.0389017	0.119981	680.726	928.962	461.868	969.219	926.986	1026.69	8314.13	8516.4	11955.9	3802.8	1972.79	3114.72	13060.1	16143.5	12783.2	14267.8	19286.3	18868	16655.1
TOX2	36.1899	4.68619	0.597228	7.41635	1.2e-13	2.52e-12	17.1253	1.07462	1.05045	1.00994	0.312526	0.519927	140.029	105.404	29.0849	41.4241	39.4999	67.8427	9.7453	0	0	0	1.249	0	2.34178	0	0	6.4246	18.7792	0	0
BFSP1	1023.04	1.13433	0.153021	7.4127	1.24e-13	2.58e-12	615.232	0.391801	0.213502	1.84024	0.0657335	0.177181	1659.91	1453.17	1308.82	1086.59	1573.27	1370.42	712.799	642.474	560.818	793.061	502.721	612.422	422.691	483.708	325.348	363.632	409.387	612.566	550.995
SYNPO2	156.553	1.33137	0.179729	7.40862	1.28e-13	2.66e-12	181.441	2.69859	0.391235	6.88537	5.76e-12	2.23e-10	269.837	283.888	282.705	209.776	157.159	131.163	125.297	103.794	140.546	56.075	47.4618	70.9369	25.7596	31.9631	60.5299	62.9611	533.33	194.837	200.585
RP11-163O19.10	11.9396	5.33459	0.712772	7.40287	1.33e-13	2.78e-12	6.44313	4.52092	1.10753	3.89065	0.0001	0.000896325	30.6633	46.3778	25.5947	11.6837	17.6489	11.3071	0	0	0	0	0	0	0	0	0	0	39.4364	6.23477	4.91228
WDR54	350.968	-1.62162	0.219263	-7.40226	1.34e-13	2.79e-12	429.35	-0.765661	0.151762	-5.04048	4.64e-07	7.39e-06	89.9458	106.81	57.0064	257.573	279.861	265.717	437.146	224.669	238.791	917.799	592.648	743.655	621.742	644.589	740.231	741.399	415.021	413.054	383.977
DGKE	1033.49	1.63591	0.22111	7.39761	1.39e-13	2.88e-12	777.305	-0.356489	0.198819	-1.79325	0.0729335	0.191265	2121.9	2304.84	1197.13	1192.8	1205.17	1447.31	491.442	596.489	332.943	402.824	597.644	511.337	628.767	559.354	775.54	695.141	375.585	667.121	509.24
CCDC68	31.8485	2.86131	0.384296	7.39076	1.46e-13	3.03e-12	157.494	1.01701	0.254236	4.02267	5.75e-05	0.000548457	62.3488	85.7287	41.8823	54.17	49.5849	48.6206	1.39219	5.25541	5.45808	4.57755	13.1144	10.0494	317.311	239.723	189.156	154.19	475.115	445.786	463.392
IFNGR2	2277.6	-0.850999	0.115237	-7.38487	1.53e-13	3.17e-12	2903.79	-0.0530661	0.116555	-0.4529	0.650621	0.809309	1651.73	1609.17	1333.25	1601.2	1828.76	1708.51	3163.05	2952.23	3006.04	3302.7	2484.88	2689.69	3692.98	4257.48	3573.79	3985.82	3720.17	3895.17	3601.52
ZCCHC24	1961.34	-1.08921	0.147569	-7.38097	1.57e-13	3.26e-12	1977.94	-0.512565	0.200871	-2.55464	0.0106298	0.0438846	1438.11	1312.63	1005.17	1480.12	1126.17	1131.84	2799.69	2476.61	2480.7	2149.16	2885.8	3250.09	2023.3	2022.2	1919.3	1927.38	1115.49	1496.35	1521.17
SNX7	2193.65	0.679965	0.0921381	7.37975	1.59e-13	3.29e-12	1760.31	0.809999	0.176692	4.58627	4.51e-06	5.79e-05	2860.89	3052.5	2811.93	2244.34	2742.3	2513.57	1748.59	1610.78	1955.36	1698.27	1485.06	1600.22	1275.1	1603.48	1226.99	1526.48	3258.2	2182.17	2000.12
PCOLCE	6669.63	-2.20337	0.298174	-7.37684	1.62e-13	3.36e-12	8137.77	-0.0651439	0.290619	-0.221252	0.824896	0.916431	2252.73	1966.14	2162.75	2419.59	1448.89	1795.57	16567	16218.2	18970.9	8595.49	3266.12	4372.08	8851.92	10950.5	8909.25	10163.7	10223.4	8586.84	9057.43
PCDHGB3	32.1251	2.7543	0.370554	7.37484	1.65e-13	3.41e-12	61.0244	-0.179431	0.33034	-0.534312	0.593126	0.76918	60.3046	51.9994	89.5815	50.4525	45.3828	45.2285	6.96093	6.56926	4.09356	2.28877	14.3634	8.27597	85.4749	82.0386	92.0559	74.5253	69.4832	62.3477	87.6024
ARL8A	971.108	-0.981901	0.133166	-7.37336	1.66e-13	3.44e-12	880.96	-0.499658	0.160814	-3.1077	0.00188552	0.0107801	736.942	656.316	671.28	630.39	587.456	611.715	1074.77	1236.34	1087.52	1673.09	1342.05	1345.44	700.192	1004.71	1005.05	1170.56	649.762	709.205	694.269
ARHGAP42	410.326	2.33325	0.316456	7.37332	1.66e-13	3.44e-12	422.082	2.09191	0.485102	4.30495	1.67e-05	0.000186254	520.255	777.18	608.456	663.848	713.519	859.341	114.159	81.4589	126.9	37.7648	212.954	208.082	307.944	145.965	76.9235	84.8047	822.531	746.614	528.071
ADAM28	35.3533	3.11141	0.41917	7.37261	1.67e-13	3.45e-12	16.9624	-0.203592	0.709453	-0.33568	0.737112	0.868202	54.1719	98.3772	103.542	54.7011	17.6489	52.0127	13.9219	11.8247	10.9162	1.14439	1.249	4.72912	8.19622	11.7198	2.52208	7.70952	3.75585	12.4695	3.27486
RTL1	55.4331	3.07836	0.42054	7.37117	1.69e-13	3.49e-12	141.645	-0.0462661	0.252173	-0.153971	0.877633	0.946312	139.007	103.999	150.078	45.6728	64.7125	81.4112	43.1578	15.7662	13.6452	1.14439	1.87349	4.72912	360.634	255.705	327.87	259.554	232.863	302.386	339.766
EPS8	4782.19	1.29753	0.176032	7.37062	1.7e-13	3.5e-12	4265.31	1.47304	0.205072	7.18323	6.81e-13	2.98e-11	6476.1	6506.95	5407.47	7092.56	7713.4	7769.12	2615.92	2410.92	3175.24	1691.4	3317.95	3209.3	2141.56	2296.01	2114.76	2102.13	6600.9	5753.14	5804.68
CUBN	426.441	1.39747	0.189652	7.36974	1.71e-13	3.52e-12	405.609	0.22144	0.281279	0.797838	0.424964	0.630077	700.146	687.235	567.737	577.283	632.838	551.787	174.023	181.312	240.156	219.722	217.95	367.098	778.641	487.97	443.886	310.951	662.907	472.284	640.234
C9orf135	25.8784	5.39129	0.599122	7.36935	1.71e-13	3.53e-12	9.32142	1.14903	0.879159	1.31895	0.187185	0.370905	84.8352	67.4586	66.3136	13.277	37.819	38.4442	0	0	0	1.14439	1.249	0	3.51267	3.19631	1.26104	11.5643	26.2909	10.9108	1.63743
WDR77	1921.8	1.43605	0.195554	7.35641	1.89e-13	3.88e-12	1380.44	0.736944	0.144695	5.08958	3.59e-07	5.81e-06	2763.79	2151.65	2195.33	2841.8	3224.7	3296.03	524.854	572.84	755.945	1425.91	1752.34	1556.47	639.305	685.075	655.741	580.784	1250.7	1122.26	846.55
CAPG	2827.92	-1.92995	0.261728	-7.35568	1.9e-13	3.9e-12	2674.83	-1.22646	0.327096	-3.75761	0.000171541	0.00143033	612.245	539.669	344.365	1618.73	1581.68	1544.55	1628.86	1425.53	1693.37	13177.6	4844.23	4924.2	1602.95	2034.98	2210.6	2941.18	980.276	1091.09	696.726
PLIN2	3660.48	1.14693	0.155967	7.35506	1.91e-13	3.92e-12	2857.2	-0.284997	0.151367	-1.88338	0.0596488	0.164975	4300.02	3929.47	4486.06	4965.06	6567.06	5930.58	2350.01	1450.49	1461.4	2939.93	2428.05	3117.68	2135.7	2757.35	2147.55	2452.91	2133.32	1942.13	1769.24
GBA3	12.7181	5.4064	0.717873	7.35204	1.95e-13	4e-12	10.1991	1.27851	0.756736	1.7093	0.087395	0.218095	40.8845	30.9185	18.6143	9.55942	24.3723	28.2678	0	0	0	0	0	0	12.8798	10.6544	1.26104	3.85476	35.6806	15.5869	9.00585
CPE	5278.09	0.892821	0.121425	7.35172	1.96e-13	4.01e-12	21630.4	-0.34437	0.127963	-2.67771	0.00741273	0.0329486	5151.44	5258.96	4807.15	7849.34	9245.49	9161.03	2517.07	3351.64	2999.22	3816.53	4082.34	5096.81	46268.8	50704.1	47693.8	49619.7	39460.8	39539.4	35835.9
FGF18	176.058	-3.41459	0.463799	-7.34927	1.99e-13	4.08e-12	316.559	-1.04851	0.378548	-2.77404	0.00553647	0.0261364	13.2874	11.2431	17.4509	22.8364	10.0851	21.4835	608.385	618.825	560.818	112.15	49.3353	66.7989	161.583	190.713	286.256	367.487	159.624	95.0803	103.977
FGD5	344.594	-1.19241	0.162396	-7.34139	2.11e-13	4.32e-12	344.438	-0.701069	0.297371	-2.37446	0.0175745	0.0649644	267.793	202.376	168.692	214.556	229.435	156.038	565.227	509.775	588.109	436.012	436.524	360.596	190.855	234.396	274.907	223.576	232.863	90.4042	103.158
ARG1	34.7906	4.10378	0.54004	7.33845	2.16e-13	4.42e-12	21.3534	0.614512	0.914518	0.619671	0.535475	0.724209	13.2874	14.0539	57.0064	42.4863	147.074	126.64	1.39219	0	0	5.72194	6.86947	2.9557	0	2.13087	0	3.85476	3.75585	4.67608	0
CNKSR2	160.411	-1.57771	0.215028	-7.33397	2.23e-13	4.56e-12	366.226	-1.37093	0.255194	-5.36243	8.21e-08	1.53e-06	71.5478	118.053	67.477	64.2605	71.4359	80.2805	320.203	278.537	272.904	122.45	247.925	209.855	747.027	703.188	834.808	752.963	176.525	372.528	320.117
SUGCT	543.699	-2.37009	0.322685	-7.33158	2.27e-13	4.64e-12	190.371	-0.632166	0.387305	-1.65444	0.0980379	0.237302	170.693	175.673	176.836	114.182	125.223	153.777	970.354	1127.29	2003.12	869.735	204.211	433.306	83.1331	80.9731	71.8793	70.6706	33.8026	59.2303	51.579
RBKS	190.803	1.92563	0.262939	7.33093	2.29e-13	4.66e-12	276.22	0.500881	0.320438	1.58031	0.114037	0.263943	216.688	222.051	304.81	381.846	364.743	313.207	33.4125	45.9849	69.5906	178.524	73.0662	85.7154	365.317	496.493	247.164	277.543	443.19	484.753	558.363
INPP5E	689.635	-0.909446	0.124114	-7.32711	2.35e-13	4.79e-12	868.614	-0.186475	0.14445	-1.29104	0.196688	0.383493	442.574	386.482	423.476	536.389	513.498	557.441	723.937	818.53	742.299	1269.13	1036.04	825.823	906.268	988.724	986.133	985.533	803.751	874.427	867.018
DFNB31	1421.56	-1.20198	0.164024	-7.32445	2.4e-13	4.88e-12	1024.35	-1.60313	0.203016	-7.90779	2.62e-15	1.55e-13	581.581	511.561	393.228	1311.23	999.263	1201.95	1173.61	1091.81	867.835	3659.75	2928.89	2337.96	533.925	450.679	534.681	583.353	197.182	148.076	169.474
KIF18B	236.889	-1.5445	0.210964	-7.32062	2.47e-13	5.02e-12	726.602	-1.16944	0.248261	-4.70425	2.55e-06	3.44e-05	105.278	101.188	97.7253	149.233	117.659	149.254	435.754	320.58	201.949	270.075	445.891	448.084	1317.25	1222.06	1418.67	1389	336.148	710.764	716.375
ETV5	576.485	-1.52116	0.208562	-7.31259	2.62e-13	5.32e-12	1778.89	-0.951983	0.242817	-3.9034	9.48e-05	0.000855234	135.941	126.485	171.019	541.169	442.062	528.042	655.72	551.818	601.754	828.537	1034.17	1301.1	4212.86	3784.43	4034.07	4461.24	1370.88	2447.15	2545.38
ITPRIP	3085.4	-1.2611	0.172219	-7.31075	2.66e-13	5.39e-12	2844.94	-1.36787	0.232951	-5.8929	3.79e-09	9.19e-08	404.756	326.05	304.81	3502.46	2432.18	3135.46	793.546	567.585	841.909	6413.15	8732.35	9570.57	503.482	628.607	832.287	905.868	292.956	252.508	277.544
RP11-20I23.6	205.605	1.54122	0.211	7.30396	2.79e-13	5.67e-12	103.115	1.02304	0.329514	3.10518	0.00190162	0.0108609	250.417	261.402	272.235	310.681	409.286	339.214	153.14	109.05	94.1519	69.8076	85.5562	112.317	42.152	43.6829	44.1364	29.5531	52.5819	90.4042	100.702
FOXS1	41.4798	-2.45132	0.334873	-7.30318	2.81e-13	5.69e-12	18.7014	-0.461331	0.559257	-0.834651	0.403914	0.610496	25.5528	19.6754	23.2679	2.65539	3.36169	2.26142	87.7077	118.247	148.733	34.3316	11.8654	20.0988	11.7089	10.6544	11.3494	28.2682	16.9013	7.79347	9.00585
FXYD5	3329.75	-1.86619	0.255353	-7.29765	2.93e-13	5.93e-12	2594.76	-0.654808	0.28518	-2.30108	0.0213869	0.0756207	1208.14	971.123	1121.51	1452.5	1537.13	1441.66	3196.46	2619.82	2917.35	12875.5	5336.33	5279.48	1210.7	1614.14	1688.53	2075.14	1173.7	916.511	1025.03
SLC9A3R1	704.645	-1.39831	0.191801	-7.29299	3.03e-13	6.13e-12	812.539	-0.938954	0.253137	-3.70193	0.000213962	0.00172721	304.589	274.051	244.313	632.515	462.232	425.148	907.705	719.991	821.442	1732.6	905.521	1025.63	1097.12	1275.33	1145.02	1169.28	441.312	674.914	702.457
GAP43	28.6303	3.68737	0.494505	7.29178	3.06e-13	6.18e-12	107.45	-0.889302	0.534288	-1.66166	0.0965816	0.234575	78.7026	92.7556	50.026	21.2431	52.1062	31.6599	1.39219	0	2.72904	5.72194	2.49799	4.72912	29.2722	46.8792	151.325	182.459	75.117	35.8499	49.9415
MTMR9LP	359.767	-3.15551	0.43245	-7.28943	3.11e-13	6.29e-12	294.743	-1.73468	0.2631	-6.59271	4.32e-11	1.48e-09	53.1498	36.5401	27.9215	56.2943	37.819	44.0978	1065.02	1446.55	1043.86	255.198	123.65	127.095	311.456	425.109	398.489	412.459	108.92	123.137	111.345
PDZD2	2538.95	1.71188	0.235179	7.28654	3.18e-13	6.42e-12	1701.56	-0.0589491	0.283828	-0.208652	0.83472	0.92223	3824.74	4362.32	4772.25	2497.66	3789.47	3965.41	1461.8	1966.84	1372.71	436.012	964.224	1054	1522.15	1128.3	1452.72	990.673	942.718	1323.33	1395.91
OSMR	3299.16	-2.02906	0.279444	-7.28324	3.26e-13	6.57e-12	2826.08	-1.47289	0.281741	-5.23157	1.68e-07	2.95e-06	608.156	687.235	625.907	2470.58	1946.42	1923.34	5344.6	2246.69	3205.26	3324.45	7377.81	9829.49	2129.85	1873.04	2510.73	2305.15	815.019	724.792	806.433
MMP23B	357.557	-3.08018	0.4195	-7.28133	3.31e-13	6.66e-12	183.888	-2.02548	0.558941	-3.65318	0.000259014	0.00204228	82.791	56.2155	109.359	40.8931	18.4893	13.5685	832.527	1328.31	1324.95	353.616	64.9477	65.0255	112.405	109.74	139.975	145.196	39.4364	10.9108	33.5673
IL20RB	109.287	1.58723	0.217951	7.27903	3.36e-13	6.77e-12	54.6598	-0.369429	0.400868	-0.928307	0.353248	0.561843	185.002	175.673	151.242	98.7806	205.063	172.999	40.3734	65.6927	60.0389	56.075	55.5803	44.9267	23.4178	20.2433	22.6987	35.9778	28.1689	9.35216	21.2866
CTD-2023N9.1	17.7062	5.30642	0.634732	7.27727	3.41e-13	6.85e-12	6.46633	0.896882	1.14118	0.644787	0.519065	0.711652	29.6412	57.6209	25.5947	27.085	44.5424	26.0064	1.39219	0	0	0	0	0.59114	0	0	0	0	0	1.55869	0
FHDC1	173.318	1.34994	0.185448	7.27702	3.41e-13	6.86e-12	205.626	-0.851016	0.278583	-3.06648	0.00216595	0.0120918	210.555	220.646	164.039	320.772	268.935	317.73	84.9233	69.6342	99.61	99.5617	143.01	80.3951	187.342	153.423	167.718	185.028	135.21	73.2586	80.234
SLC6A6	1858.9	-1.6279	0.223788	-7.27407	3.49e-13	7e-12	999.455	-0.412552	0.294166	-1.41187	0.157988	0.330706	1066.06	907.881	759.698	1194.4	747.136	695.388	3612.72	2680.26	2432.94	1564.38	3081.9	3563.99	453.134	585.99	472.89	502.404	373.707	361.617	392.164
C5orf56	77.9322	-1.76005	0.241989	-7.27368	3.5e-13	7.01e-12	96.0314	-1.16206	0.296613	-3.91206	9.15e-05	0.0008282	23.5086	21.0808	27.9215	46.7349	45.3828	47.4899	98.8452	135.327	109.162	177.38	103.042	99.3116	155.728	105.478	195.461	151.62	90.1404	54.5543	58.9474
EFNB1	785.671	1.13332	0.155897	7.27364	3.5e-13	7.01e-12	2714.71	0.58497	0.166958	3.51271	0.000443556	0.00320191	1007.8	928.962	884.181	1229.45	1224.5	1137.5	320.203	281.165	442.105	631.702	615.755	724.738	4334.63	4614.4	3399.76	3435.87	5526.73	6696.14	5591.82
FAM20C	2814.88	-0.985994	0.135599	-7.27024	3.59e-13	7.19e-12	2721.13	0.0359673	0.123013	0.290566	0.771383	0.887852	1453.44	1288.74	1254.14	2495.01	2257.38	2434.42	3295.3	2056.18	2194.15	5453.01	4662.5	4934.25	1761.02	1879.43	1863.82	2103.41	2277.92	1943.69	1640.7
HIST2H2BE	247.12	1.61322	0.221945	7.26807	3.65e-13	7.3e-12	878.866	-0.184961	0.10758	-1.71294	0.0867236	0.216819	282.103	234.7	399.045	429.112	457.19	446.631	107.198	128.758	167.836	82.3959	109.287	121.184	1460.1	1668.47	1624.22	1687.1	1331.45	1496.35	1419.65
CYP3A5	893.892	1.14296	0.157387	7.26364	3.77e-13	7.53e-12	578.408	-0.72404	0.220474	-3.28231	0.00102959	0.00649453	1489.22	1550.14	1002.85	1149.79	1062.29	1100.18	616.738	697.656	745.028	344.461	510.214	458.134	860.603	446.418	775.54	526.817	347.416	391.232	438.012
AHNAK2	29939.1	-2.12531	0.293006	-7.2633	3.78e-13	7.55e-12	19948.5	-1.79471	0.312539	-5.78317	7.33e-09	1.69e-07	1977.79	2406.03	6945.48	26215.1	14383.8	15316.6	23012.8	15146.1	18002.1	99337.4	68631	67894.3	878.167	865.134	1488.03	1215.53	458.214	282.123	195.673
LINGO2	98.5163	2.85614	0.40029	7.26087	3.85e-13	7.68e-12	65.877	-1.06977	0.665442	-1.68253	0.0924656	0.227333	175.803	215.024	148.915	117.368	181.531	174.13	71.0015	39.4156	38.2066	5.72194	5.62048	9.45825	4.68356	9.58892	35.3091	55.2515	26.2909	4.67608	4.09357
NCSTN	2724.41	0.49316	0.0679464	7.25812	3.93e-13	7.83e-12	2487.5	0.22396	0.107919	2.07361	0.0381153	0.118118	3128.68	2844.51	3126.05	3247.01	3438.17	3326.55	2155.1	1968.15	2198.24	2343.7	2427.42	2489.29	2032.66	2225.7	1717.54	2095.7	2328.63	2403.51	2341.52
GPR153	7257.4	1.87755	0.258901	7.25709	3.96e-13	7.88e-12	3058.07	1.39899	0.276762	5.03108	4.88e-07	7.75e-06	11573.4	8616.43	21318.1	7066	9971.62	10455.7	2465.56	2282.16	2727.68	4051.13	3430.36	3130.68	176.804	171.535	301.389	348.213	944.596	520.603	528.071
DIMT1	893.263	0.79468	0.109516	7.25638	3.98e-13	7.92e-12	856.531	0.224215	0.120347	1.86134	0.062696	0.170937	1172.36	1245.17	1123.84	1114.73	1063.98	1087.74	533.207	662.182	611.305	636.279	707.556	760.798	600.666	744.74	650.697	619.331	706.099	851.046	736.843
LRRC70	38.86	2.30243	0.316849	7.25391	4.05e-13	8.06e-12	64.1571	-0.718867	0.392062	-1.83061	0.0671592	0.179953	57.2382	60.4317	65.1502	69.5713	76.4785	59.9277	11.1375	5.25541	4.09356	26.3209	10.6165	20.0988	103.038	64.9916	104.666	64.246	39.4364	45.2021	64.6784
SLC25A10	1373.47	2.2236	0.30945	7.25112	4.13e-13	8.21e-12	966.432	0.704759	0.22075	3.18875	0.00142889	0.00861399	1730.43	1194.58	2594.37	2077.05	2774.24	2763.46	197.69	204.961	204.678	1173	609.51	957.648	388.735	416.585	372.007	359.777	792.484	545.543	552.632
AC112229.1	29.1176	2.35995	0.323561	7.25115	4.13e-13	8.21e-12	19.1558	-0.187928	0.676388	-0.305988	0.759614	0.881577	43.9508	46.3778	44.2091	63.7294	43.702	53.1435	15.314	6.56926	8.18713	4.57755	13.739	5.91141	12.8798	6.39261	15.1325	3.85476	16.9013	0	8.18714
ULK3	822.002	-1.24676	0.171917	-7.24968	4.18e-13	8.29e-12	1005.31	-0.377517	0.191051	-1.97954	0.047755	0.140334	309.7	293.726	500.26	646.323	565.605	538.219	783.801	880.281	727.29	1839.03	1564.99	1214.79	727.122	1014.29	955.868	1088.33	818.775	762.201	605.03
PPP2R2C	257.276	2.2554	0.310546	7.24926	4.19e-13	8.31e-12	80.1542	2.30064	0.40083	5.69687	1.22e-08	2.67e-07	721.611	552.318	621.254	180.036	292.467	253.279	151.748	51.2403	50.4873	53.7862	89.9276	69.1634	5.85444	8.52349	8.82728	5.13968	43.1923	35.8499	33.5673
STOX1	146.606	2.50099	0.344566	7.24919	4.19e-13	8.31e-12	86.1271	-0.410783	0.371358	-1.14348	0.252838	0.453389	226.909	274.051	84.9279	251.731	313.478	365.22	20.8828	24.9632	77.7777	33.1872	41.2168	44.9267	17.5633	25.5705	15.1325	23.1286	11.2675	14.0282	18.0117
NINJ1	3045.21	-1.42254	0.196514	-7.24854	4.21e-13	8.34e-12	2649.1	0.145372	0.239276	0.607358	0.543614	0.730726	935.232	763.126	759.698	3286.32	2288.47	2372.23	2480.88	2577.78	2922.8	8629.83	5045.94	4480.25	1508.11	2078.66	1711.23	1870.84	2123.93	1984.22	1846.2
TSHR	27.3873	3.29919	0.447803	7.24767	4.24e-13	8.39e-12	14.2803	-1.84963	0.829293	-2.22005	0.0264156	0.0887611	37.8181	73.0802	77.9476	49.3903	24.3723	42.9671	4.17656	2.62771	1.36452	2.28877	3.74699	8.86711	15.2216	2.13087	6.3052	42.4023	5.63377	0	4.91228
CD22	51.6555	1.90217	0.262805	7.24524	4.32e-13	8.53e-12	55.1143	-1.29547	0.292804	-4.40518	1.06e-05	0.000123947	39.8623	30.9185	47.6992	110.464	128.585	126.64	6.96093	6.56926	6.82261	49.2087	31.8494	34.2862	69.0824	72.4496	65.5741	53.9666	20.6572	37.4086	22.1053
P2RX6	114.815	2.39744	0.332027	7.24272	4.4e-13	8.68e-12	82.1149	1.34399	0.341441	3.9318	8.43e-05	0.00076998	158.427	137.728	188.47	173.663	226.074	272.502	54.2952	31.5325	69.5906	30.8985	16.8614	17.7342	22.2469	14.9161	27.7429	21.8436	65.7273	51.4369	51.579
MKLN1	2596.09	1.07431	0.148434	7.23903	4.52e-13	8.92e-12	2399.91	0.0343994	0.153534	0.225609	0.821506	0.914692	3230.89	4393.24	2979.46	3466.35	3588.6	3421.53	1577.35	1397.94	1255.36	1795.54	2211.35	1835.49	2888.58	2121.28	2686.01	1913.24	2283.56	2356.74	2736.96
TDH	33.3838	3.98375	0.530827	7.23213	4.75e-13	9.37e-12	10.3516	3.4619	0.777121	4.24617	2.17e-05	0.000234771	77.6805	81.5125	165.202	21.2431	20.1701	22.6142	0	2.62771	1.36452	4.57755	1.249	2.36456	4.68356	1.06544	0	0	39.4364	14.0282	16.3743
SPRY4	1589.79	-2.18949	0.306018	-7.21825	5.27e-13	1.04e-11	3740.77	-0.702573	0.288524	-2.43109	0.0150533	0.0575348	249.395	224.862	230.352	1537.47	727.806	996.157	2465.56	1899.83	1731.58	1971.78	3106.25	3936.41	5177.67	5043.77	6109.74	5807.84	2854.45	3318.46	3961.76
PHLDA2	398.109	-1.87345	0.259831	-7.21135	5.54e-13	1.09e-11	368.883	0.40139	0.290224	1.37295	0.169769	0.347288	61.3267	32.3239	38.3921	368.038	215.148	288.332	130.865	118.247	261.988	1473.97	816.843	971.835	80.7913	116.132	108.449	114.358	169.013	120.019	129.357
H1FX	3205.82	-0.975653	0.135264	-7.21108	5.55e-13	1.09e-11	6028.86	-0.371927	0.160349	-2.31679	0.0205153	0.0732558	1860.24	1578.25	2028.96	2439.78	2292.67	2494.35	3132.42	3254.41	3000.58	5977.14	4292.17	6118.9	7263.02	9536.72	7977.34	9725.56	6860.06	6822.4	6299.19
SMAD9	2234.01	1.71939	0.238643	7.21079	5.56e-13	1.09e-11	1662.11	0.474021	0.263193	1.79996	0.0718671	0.18927	3554.9	3728.49	3586.75	3228.96	3216.3	3196.52	1564.82	1405.82	1026.12	355.904	916.762	1026.81	1304.37	1165.59	1271.13	1043.36	1515.48	1862.64	1625.15
QRICH2	506.624	1.64447	0.228299	7.205	5.8e-13	1.14e-11	432.985	-0.217677	0.297782	-0.734605	0.46258	0.663923	763.517	706.91	656.155	931.512	663.094	888.74	153.14	229.924	204.678	445.167	272.905	163.746	346.583	289.798	392.183	312.235	232.863	269.654	356.141
COL8A2	4411.6	-2.76413	0.387056	-7.19869	6.08e-13	1.19e-11	6352.9	-1.2841	0.161466	-7.95002	1.86e-15	1.12e-13	799.291	839.017	247.803	1518.88	1241.3	1222.3	11388.1	12678.7	9940.54	4495.15	3986.79	4581.34	9340.18	10901.5	12056.8	12988	5032.84	4641.79	4223.74
ZNF703	2150.83	1.62415	0.225294	7.19926	6.05e-13	1.19e-11	1603.59	-0.0472639	0.231545	-0.201952	0.839955	0.925558	6158.22	4772.7	4018.37	1392.49	1919.53	1717.55	1038.57	1471.52	1329.04	1000.2	473.369	518.43	1613.48	1870.9	1971.01	2216.49	2101.4	1650.66	1817.55
RP3-439F8.1	18.4853	-3.27707	0.444518	-7.19727	6.14e-13	1.2e-11	10.3923	0.359	0.746994	0.477716	0.632852	0.797814	0	1.40539	3.49019	4.77971	3.36169	4.52285	30.6281	14.4524	34.113	54.9306	29.3514	40.7887	0	3.19631	2.52208	6.4246	3.75585	1.55869	5.731
HAUS4	1270.85	-0.74826	0.103964	-7.19713	6.15e-13	1.2e-11	1120.16	-0.469651	0.117813	-3.98697	6.69e-05	0.000627029	994.514	985.177	848.116	983.558	928.667	928.314	1786.17	1676.48	1700.19	1639.91	1265.23	1513.91	1210.7	1266.8	1156.37	1412.13	931.45	869.751	928.422
TP53I11	716.716	1.81237	0.251852	7.19454	6.27e-13	1.23e-11	471.72	0.239966	0.513786	0.404844	0.685592	0.83372	1173.38	916.313	1866.09	941.603	972.369	877.432	541.56	191.822	301.559	264.353	214.203	339.906	43.3229	94.8238	30.265	124.637	185.915	29.6152	43.3918
ST5	879.254	-1.61727	0.225247	-7.19215	6.38e-13	1.25e-11	1286.24	-0.339979	0.210458	-1.61969	0.105299	0.249642	345.474	259.997	171.019	737.137	505.094	690.865	1243.22	861.888	1114.81	1863.06	1498.17	1260.31	1261.05	1057.98	1281.22	1308.05	863.845	852.605	1178.95
ADCK2	692.018	-1.008	0.140143	-7.19204	6.38e-13	1.25e-11	765.999	-0.674356	0.193875	-3.47914	0.000503029	0.0035647	386.358	335.888	449.071	509.836	556.36	498.644	725.329	794.881	751.851	1414.46	917.387	964.15	818.451	1020.69	844.897	986.818	728.635	567.364	432.281
NAT2	22.9368	2.45559	0.338829	7.18394	6.77e-13	1.32e-11	13.343	-2.04301	0.669992	-2.99372	0.00275597	0.0147543	60.3046	39.3509	37.2287	37.1755	28.5744	33.9214	4.17656	3.94156	10.9162	5.72194	6.24498	7.68483	11.7089	10.6544	16.3935	24.4135	5.63377	4.67608	0.818714
LIPG	874.734	-2.75518	0.386318	-7.18281	6.83e-13	1.33e-11	362.062	0.0927649	0.293973	0.292965	0.769549	0.886921	154.339	157.403	70.9672	252.793	258.85	299.639	2748.17	1173.27	2588.5	580.204	1229.01	983.658	110.064	129.983	71.8793	65.5309	78.8728	105.991	114.62
LRP1B	184.8	3.76731	0.526175	7.18273	6.83e-13	1.33e-11	102.083	-0.719919	0.629732	-1.14453	0.252404	0.452987	447.685	632.425	169.856	154.544	233.637	455.677	0	23.6493	68.2261	6.86632	14.9879	10.0494	101.867	80.9731	71.8793	52.6817	110.797	6.23477	19.6491
FAM101B	3940.36	-2.92138	0.41009	-7.17614	7.17e-13	1.39e-11	1239.97	0.877051	0.188558	4.64116	3.46e-06	4.53e-05	513.1	407.563	483.973	1082.34	662.253	729.309	12579.8	10982.5	12422.6	2459.29	2217.59	2744.07	469.526	447.483	343.003	408.604	845.066	752.849	710.644
SLC4A4	805.026	1.82993	0.25494	7.17711	7.12e-13	1.39e-11	424.653	2.95938	0.38658	7.63968	2.18e-14	1.17e-12	1317.5	1555.76	1276.25	865.127	1187.52	1395.3	286.79	384.959	342.495	143.048	474.618	430.941	77.2787	54.3372	32.787	33.4079	499.528	327.326	395.439
RNF175	215.726	-1.8451	0.256773	-7.17483	7.24e-13	1.41e-11	301.113	-2.30801	0.233704	-9.86814	5.72e-23	7.69e-21	63.3709	98.3772	31.4117	132.239	93.2869	101.764	199.083	214.158	146.004	616.825	401.552	490.647	331.361	487.97	482.978	557.655	75.117	104.432	95.7895
TOB1	3331.38	1.54248	0.214887	7.16868	7.57e-13	1.47e-11	4501.09	0.0519411	0.196856	0.265626	0.790528	0.899135	3019.32	2663.21	2656.03	6842.42	7600.78	7849.4	1248.79	1122.03	1552.83	1215.34	1857.26	2349.19	4221.05	5069.34	4496.87	4891.69	5267.58	4654.26	4610.18
FAM188A	1050.47	1.61189	0.224897	7.16561	7.74e-13	1.5e-11	789.318	0.110382	0.22622	0.487533	0.625881	0.792993	1524.99	1721.6	2483.85	1045.69	1396.78	1419.04	356.4	543.935	609.941	320.428	587.652	595.279	679.115	736.216	757.885	624.471	931.45	660.886	677.895
RP11-418J17.1	342.68	1.05763	0.147659	7.16432	7.82e-13	1.52e-11	272.246	-0.368178	0.16968	-2.16581	0.0303255	0.0990452	528.432	498.913	557.267	393.529	374.829	403.664	310.457	243.063	319.298	124.738	194.219	163.746	364.146	339.874	418.665	328.939	230.985	303.945	302.924
PSME1	643.207	-1.27593	0.178168	-7.16243	7.93e-13	1.54e-11	688.804	-0.118395	0.258727	-0.46854	0.639399	0.802196	269.837	259.997	240.823	542.762	470.637	472.638	691.916	718.678	558.089	1684.54	879.293	929.273	334.874	462.399	436.32	547.376	550.232	358.499	322.573
ADCYAP1R1	41.3015	2.97038	0.412916	7.16107	8e-13	1.55e-11	99.5298	-0.837011	0.425395	-1.9676	0.049114	0.143296	141.051	64.6479	108.196	29.2093	70.5955	27.1371	9.7453	27.5909	6.82261	4.57755	2.49799	3.54684	66.7407	70.3188	76.9234	152.905	50.7039	42.0847	57.31
TRIM35	1325.53	1.66526	0.232604	7.15892	8.13e-13	1.57e-11	843.275	0.104091	0.328001	0.311	0.7558	0.879374	2160.74	1715.98	2144.14	1825.32	2003.57	2307.78	488.657	525.541	895.126	326.15	874.921	638.432	389.906	660.57	387.139	574.359	486.382	664.003	472.398
CALHM2	343.835	-1.35507	0.189292	-7.15758	8.21e-13	1.59e-11	410.964	-1.36614	0.207429	-6.59157	4.35e-11	1.48e-09	168.648	216.43	136.117	208.183	216.829	183.175	593.071	589.92	638.596	431.434	386.564	357.049	306.773	449.614	485.5	588.493	195.304	174.574	160.468
AGT	1924.01	1.39113	0.194025	7.15636	8.28e-13	1.6e-11	1310.8	1.69917	0.413276	4.07017	4.7e-05	0.000457669	1163.16	858.692	1501.94	4255.53	4955.13	4613.3	612.562	479.556	656.335	1514.02	1258.36	1219.52	23.4178	41.552	29.0039	17.9889	189.67	29.6152	67.1345
MAGEE1	552.965	2.29057	0.31908	7.15624	8.29e-13	1.6e-11	190.373	-1.29967	0.290379	-4.47895	7.5e-06	9.11e-05	1296.04	1197.39	2091.79	267.133	464.754	424.017	155.925	135.327	201.949	89.2622	130.52	181.48	165.095	201.367	243.381	183.744	71.3611	74.8173	90.0585
RNF217	1589.31	1.18326	0.165519	7.14924	8.73e-13	1.68e-11	3771.74	0.820709	0.196601	4.1896	2.79e-05	0.00029225	2046.27	2719.43	1946.36	2152.99	2285.11	2103.12	1134.63	1074.73	1000.19	575.627	1046.03	987.205	6230.3	5572.23	4856.27	4228.67	7960.52	9850.94	10021.1
GLRB	267.772	-1.48218	0.207417	-7.14597	8.94e-13	1.72e-11	255.452	0.54154	0.165597	3.27101	0.00107162	0.00671546	134.919	132.106	100.052	148.171	154.638	165.084	309.065	488.753	541.715	265.498	377.197	396.064	208.418	231.2	190.417	240.28	336.148	316.415	302.105
TNNC1	85.9405	2.23646	0.312991	7.14288	9.14e-13	1.76e-11	84.0178	2.61554	0.42444	6.14248	8.12e-10	2.24e-08	116.521	113.836	125.647	145.516	197.499	156.038	26.4515	44.671	34.113	42.3423	16.2369	12.414	23.4178	17.047	13.8714	7.70952	131.455	91.9629	83.5088
RASL10A	67.6255	-3.21436	0.450853	-7.13784	9.48e-13	1.82e-11	113.458	-0.988388	0.495861	-2.0138	0.0440301	0.131869	2.04422	0	1.1634	31.8647	26.8935	18.0914	26.4515	53.868	20.4678	393.669	131.769	105.223	48.0064	61.7953	100.883	125.922	43.1923	40.526	38.4796
SLC35A2	1373.24	0.791621	0.111037	7.12996	1e-12	1.93e-11	1339.17	0.786353	0.104017	7.56183	3.97e-14	2.06e-12	1806.07	1548.74	1790.47	1739.81	1767.41	1770.69	821.39	892.106	904.677	1296.59	1026.67	1114.3	1093.61	1198.62	1042.88	1075.48	1949.29	1953.04	1816.73
CHST9	24.2733	4.21789	0.561179	7.12842	1.02e-12	1.95e-11	33.0459	-2.92975	0.492167	-5.82647	5.66e-09	1.33e-07	37.8181	21.0808	29.0849	48.8592	87.404	56.5356	0	1.31385	6.82261	1.14439	0.624498	0.59114	45.6647	61.7953	55.4858	102.794	5.63377	7.79347	9.82457
TEAD3	752.008	-0.834201	0.117051	-7.12659	1.03e-12	1.97e-11	965.8	-0.48823	0.125353	-3.89519	9.81e-05	0.000882226	615.311	497.507	502.587	577.814	484.924	546.134	1165.26	1014.29	967.445	983.029	848.692	821.094	1165.03	1248.69	1170.25	1146.15	890.136	752.849	882.574
PLXNB1	7395.98	1.43379	0.201422	7.12457	1.04e-12	2e-11	6451.94	-0.343986	0.215013	-1.59034	0.111758	0.260252	11168.6	11118	9217.59	11757.5	9822.86	11290.2	4918.59	6487.81	4059.45	3750.16	2727.18	2433.73	8219.64	8484.07	9750.36	9396.62	9757.69	5259.03	6161.64
SNAPC3	1857.14	1.30721	0.183494	7.12249	1.06e-12	2.03e-11	1049.03	0.17827	0.229625	0.776372	0.437529	0.641554	4017.92	3394.01	2925.94	1743.53	1913.64	1988.92	1468.76	1311.22	1150.29	468.055	904.897	998.436	985.888	914.144	822.198	797.935	1252.58	880.662	862.106
FAM83A-AS1	14.5239	5.27978	0.680818	7.12225	1.06e-12	2.03e-11	10.6385	1.11633	1.16974	0.923948	0.355513	0.56394	13.2874	5.62155	6.98038	22.3053	60.5104	65.5813	0	0	0	0	0	0	0	0	0	0	0	0	1.63743
NRROS	37.1177	-2.06139	0.288807	-7.12044	1.08e-12	2.06e-11	62.0492	-1.59797	0.304828	-5.23465	1.65e-07	2.91e-06	11.2432	18.2701	3.49019	14.3391	15.968	21.4835	43.1578	68.3204	49.1228	62.9413	76.1887	60.8875	66.7407	75.6459	79.4455	82.2348	15.0234	24.9391	30.2924
NNT	3543.75	0.89896	0.126279	7.12016	1.08e-12	2.06e-11	2695.54	0.244772	0.148821	1.64156	0.100682	0.24187	4266.29	5150.75	5148.03	4473.28	4143.28	4362.29	3132.42	3079.67	2739.96	1659.36	2190.11	2179.54	1707.16	1630.12	2247.17	2058.44	2262.9	2179.05	2348.89
CP	475.949	2.81819	0.388358	7.11931	1.08e-12	2.07e-11	380.147	3.00775	0.880423	3.88572	0.000102028	0.000911388	104.255	80.1071	60.4966	2312.85	1291.73	1472.19	29.2359	13.1385	32.7485	64.0857	131.144	119.41	0	0	0	0	13.1455	0	4.09357
CA5B	2070.05	-1.57791	0.221656	-7.11651	1.11e-12	2.11e-11	1411.06	-0.118592	0.277993	-0.432354	0.665484	0.819897	836.087	1155.23	873.711	1145.01	911.018	1113.75	2827.53	2250.63	2177.78	2094.23	4134.8	5320.86	643.989	367.575	634.303	493.409	486.382	441.11	545.264
CLIC5	32.8178	3.40984	0.47694	7.11309	1.13e-12	2.16e-11	35.5194	1.38253	0.591022	2.32109	0.0202822	0.072588	0	0	2.32679	110.464	131.946	126.64	0	0	0	6.86632	3.74699	11.8228	1.17089	5.32718	7.56624	5.13968	9.38962	15.5869	14.7369
FRAT1	124.54	1.30116	0.182954	7.11266	1.14e-12	2.17e-11	58.2117	-0.29649	0.456245	-0.696962	0.485827	0.684668	211.577	196.754	245.477	120.555	140.351	140.208	83.5311	89.342	121.442	61.7969	34.9719	48.4735	12.8798	18.1124	25.2208	28.2682	37.5585	6.23477	9.82457
CTB-109A12.1	16.1766	-3.4062	0.460226	-7.11031	1.16e-12	2.2e-11	4.4965	-0.821995	0.911968	-0.923574	0.355708	0.564023	3.06633	2.81078	3.49019	1.06216	1.68084	1.13071	47.3343	55.1818	34.113	21.7434	11.8654	10.6405	7.02533	2.13087	5.04416	0	3.75585	0	1.63743
AMH	220.225	-1.5627	0.21998	-7.11014	1.16e-12	2.2e-11	203.213	-0.467213	0.313604	-1.49564	0.134747	0.296516	80.7468	63.2425	68.6404	191.719	119.34	158.3	250.593	300.872	256.53	518.408	376.572	257.737	152.216	152.357	168.979	150.336	60.0936	123.137	148.187
GAL3ST4	182.098	-1.32711	0.186656	-7.10993	1.16e-12	2.2e-11	189.164	-0.375733	0.475372	-0.809043	0.41849	0.623501	86.8795	103.999	76.7841	120.024	121.021	108.548	238.064	365.251	231.969	278.086	231.689	222.86	107.722	119.329	206.811	143.911	229.107	57.6716	45.0293
TSPAN8	36.5459	2.38947	0.334257	7.11052	1.16e-12	2.2e-11	25.2464	0.784525	0.772764	0.980629	0.326776	0.535422	40.8845	37.9455	33.7385	100.905	69.7551	89.3262	6.96093	15.7662	2.72904	20.599	8.11847	11.8228	5.85444	1.06544	13.8714	0	24.413	3.11739	2.45614
MARK1	251.171	1.06966	0.150456	7.10804	1.18e-12	2.23e-11	399.359	-1.47909	0.232401	-6.36499	1.95e-10	6e-09	288.235	293.726	255.947	451.417	410.967	350.521	139.219	145.838	173.294	160.214	199.839	144.829	529.242	531.652	549.813	659.164	118.309	193.278	283.275
RP4-773N10.4	460.626	-0.767489	0.108003	-7.10643	1.19e-12	2.26e-11	357.465	-0.473267	0.222511	-2.129	0.0332543	0.106497	363.872	368.212	410.679	318.647	279.02	312.077	606.993	616.197	564.912	551.595	625.746	509.563	324.336	335.612	398.489	388.046	144.6	305.504	320.936
FAM211B	420.25	-1.81995	0.255738	-7.1053	1.2e-12	2.27e-11	401.837	1.1959	0.263098	4.54378	5.53e-06	6.93e-05	209.533	143.35	188.47	180.567	133.627	139.078	974.53	1190.35	781.87	512.686	279.775	309.166	292.722	365.445	208.072	227.431	715.489	659.327	528.071
RP11-796E2.4	109.08	1.44901	0.203907	7.10456	1.21e-12	2.28e-11	80.236	0.864907	0.272798	3.17449	0.001501	0.00897504	146.162	160.214	191.96	143.922	177.329	144.731	58.4718	44.671	45.0292	45.7755	65.5722	85.1242	52.69	62.8607	46.6585	47.542	133.333	74.8173	85.1462
PSRC1	581.279	-2.0791	0.292625	-7.09838	1.26e-12	2.39e-11	528.265	-0.928179	0.245303	-3.78169	0.000155764	0.0013147	222.82	177.079	147.751	225.177	196.659	186.567	1672.02	1467.57	1166.67	694.643	436.524	381.877	744.685	750.067	911.732	826.203	272.299	503.458	485.497
TRIM6	192.832	1.61496	0.227666	7.09161	1.33e-12	2.5e-11	182.302	0.577364	0.25193	2.29807	0.0215578	0.0760055	270.859	254.375	406.025	198.092	340.371	283.809	82.139	145.838	79.1422	62.9413	100.544	89.8534	183.829	219.48	158.891	203.017	199.06	314.856	343.041
TWIST2	44.9203	-1.76633	0.248687	-7.08986	1.34e-12	2.53e-11	109.337	0.746854	0.356563	2.10989	0.0348674	0.110258	27.597	25.297	15.1242	16.9945	13.4468	19.2221	75.178	91.9697	102.339	48.0643	39.9678	63.8432	190.855	191.778	93.317	84.8047	170.891	324.208	222.69
GRIA3	563.803	1.8817	0.265427	7.08841	1.36e-12	2.56e-11	337.568	-0.0192772	0.311395	-0.0784532	0.937468	0.980893	771.694	862.908	386.248	1107.83	1216.93	1015.38	239.456	157.662	136.452	152.204	288.518	430.35	85.4749	85.2349	69.3572	74.5253	90.1404	59.2303	82.6901
BOLA3-AS1	173.64	-1.24045	0.175096	-7.08311	1.41e-12	2.66e-11	217.219	0.279907	0.175308	1.60029	0.109535	0.256894	135.941	101.188	70.9672	100.905	95.8082	110.81	232.495	260.143	186.939	255.198	244.803	288.477	234.178	305.78	253.469	224.861	388.73	291.476	257.895
MYO5C	962.483	1.9553	0.276065	7.08146	1.43e-12	2.69e-11	450.877	1.92073	0.243193	7.88927	3.04e-15	1.77e-13	1415.62	1711.76	3052.75	852.912	1084.99	1230.21	285.398	325.836	407.992	262.065	495.227	425.03	125.285	105.478	93.317	120.782	546.476	383.438	354.503
PTPLAD1	6284.98	1.11385	0.157336	7.07974	1.44e-12	2.72e-11	4813.81	0.76686	0.181132	4.23273	2.31e-05	0.000247074	9131.54	9434.37	8268.26	6551.39	9547.2	8731.36	3438.7	3857.47	3695.12	3049.79	4921.04	4793.56	3221.11	3520.2	3147.56	2937.33	5733.3	5427.37	5258.6
HSD17B4	5710.1	1.1121	0.157086	7.07871	1.46e-12	2.74e-11	3143.43	0.212369	0.243197	0.863972	0.387603	0.59498	9239.89	9444.21	8898.82	6488.72	7046.94	6039.13	2794.12	3391.05	4609.35	4156.42	3240.52	3172.06	1407.41	1638.64	1509.46	1666.54	2015.01	1430.88	1960
ASXL1	2544.72	-0.892134	0.126044	-7.07801	1.46e-12	2.75e-11	3197.08	-0.603648	0.160042	-3.76724	0.000165059	0.00138151	1988.01	1914.14	1647.37	1633.07	1808.59	1685.89	3978.87	3188.72	2733.14	2859.82	3775.09	3323.98	5397.8	4740.12	5113.52	6134.21	3656.32	2802.53	4076.38
ALDH7A1	1270.37	0.939622	0.132927	7.07021	1.55e-12	2.9e-11	1116.88	-0.220891	0.155281	-1.42257	0.154859	0.326015	1834.69	1959.11	1809.08	1279.37	1655.63	1423.57	1007.94	1190.35	1080.7	535.573	698.188	770.256	1170.89	1234.84	1383.36	1326.04	1012.2	1195.52	1080.7
TMEM133	95.3128	1.5205	0.214923	7.07034	1.55e-12	2.9e-11	90.807	1.4691	0.23764	6.17591	6.58e-10	1.85e-08	83.8131	141.944	123.32	163.572	161.361	179.783	40.3734	27.5909	64.1325	48.0643	52.4578	57.3406	37.4684	43.6829	29.0039	25.6984	95.7741	95.0803	96.6082
LDB2	283.589	-2.18841	0.309237	-7.06964	1.55e-12	2.91e-11	949.856	0.528949	0.337205	1.58116	0.113842	0.263731	88.9237	136.323	66.3136	116.306	63.8721	88.1955	508.148	471.673	908.771	176.236	283.522	494.785	1065.51	1294.5	1137.46	1225.81	1569.94	1920.31	1675.09
PLK4	175.248	-1.42307	0.201276	-7.06744	1.58e-12	2.96e-11	555.148	-0.760446	0.203314	-3.73442	0.000188144	0.00154885	79.7247	85.7287	124.483	90.2834	78.1593	99.5026	182.376	235.18	170.565	329.584	313.498	313.896	757.565	746.87	991.178	1306.76	450.702	568.923	652.515
MMP13	4570.67	-3.09743	0.459985	-7.06567	1.6e-12	2.99e-11	4129.2	4.49694	0.736964	6.07881	1.21e-09	3.23e-08	124.698	141.944	235.006	1828.5	3120.49	2272.73	10130.9	1767.13	3049.7	6956.73	11760.5	13459.7	392.248	369.706	18.9156	21.8436	8093.85	5248.12	6029.83
SCIN	10770.3	1.83136	0.259814	7.06167	1.65e-12	3.08e-11	5532.45	3.43997	0.311615	11.0498	2.2e-28	5.21e-26	20991.1	20074.6	18918	11902	15007.4	14172.3	2860.94	2895.73	4299.61	4100.34	6743.95	7278.12	483.577	481.577	755.363	875.03	11750.2	5087.57	5233.22
PLEKHO1	1410.31	-1.78555	0.252574	-7.06112	1.65e-12	3.09e-11	1444.53	0.0514759	0.323701	0.156241	0.875843	0.94542	426.22	335.888	312.954	753.601	821.093	905.7	1326.75	968.31	1022.03	5797.47	2298.78	1954.9	929.686	1227.38	1117.28	1408.27	1047.88	1349.83	1241.17
RP11-2E17.1	60.6321	1.88723	0.267029	7.05669	1.71e-12	3.18e-11	918.599	2.45758	0.54483	4.55777	5.17e-06	6.53e-05	146.162	127.89	66.3136	66.9159	94.1273	78.0191	18.0984	24.9632	30.0195	27.4653	28.1024	19.5076	1331.3	1057.98	155.108	142.626	3171.81	4827.27	4442.34
NUDT11	523.287	1.30232	0.184555	7.05527	1.72e-12	3.21e-11	559.553	-0.966068	0.174416	-5.53889	3.04e-08	6.15e-07	687.881	692.856	494.443	728.64	1014.39	877.432	339.693	303.5	189.668	262.065	313.498	375.374	555.001	652.047	728.881	791.51	324.881	383.438	334.854
PAK3	272.925	-2.69784	0.382399	-7.05463	1.73e-12	3.23e-11	128.662	-2.68029	0.5078	-5.27816	1.3e-07	2.35e-06	176.825	94.161	62.8234	35.0512	19.3297	19.2221	964.785	780.429	564.912	40.0536	281.648	235.865	132.31	150.226	259.774	152.905	24.413	18.7043	29.4737
IER2	3221.44	-1.17257	0.166527	-7.04621	1.84e-12	3.43e-11	16374.6	-0.461081	0.245992	-1.86618	0.0620155	0.169564	443.596	406.157	524.692	4239.6	3044.85	3469.02	1161.08	1022.18	1113.45	10333.8	5581.14	7317.73	22565.4	29455	27441.5	33798.5	27029	17890.7	16668.2
PTPRF	2816.55	-1.47352	0.20918	-7.04465	1.86e-12	3.46e-11	2736.84	-0.523709	0.228785	-2.29367	0.0218096	0.0767218	1701.82	1398.36	907.449	1988.36	1527.89	1345.55	5373.84	3829.88	2709.94	3587.66	4465.78	4962.03	1935.48	1915.65	2825.99	3384.48	1904.21	1670.92	1652.98
TBX20	73.7756	2.95101	0.416812	7.04291	1.88e-12	3.5e-11	34.8006	0.639757	0.578159	1.0977	0.272337	0.475258	157.405	139.133	245.477	58.4187	80.6806	119.856	2.78437	17.0801	30.0195	2.28877	15.6124	16.5519	16.3924	21.3087	13.8714	8.99444	46.9481	18.7043	9.82457
GNPTAB	2093.49	1.42149	0.201931	7.04226	1.89e-12	3.52e-11	1534.27	1.06252	0.243359	4.36362	1.28e-05	0.00014743	2990.7	3462.88	2708.39	2838.62	3175.96	3101.54	767.094	1020.86	981.091	795.349	1711.75	1567.7	940.224	724.496	812.11	657.879	2092.01	1285.92	1571.11
WSB2	4893.52	1.58576	0.225409	7.04146	1.9e-12	3.53e-11	2771.22	1.52189	0.209731	7.25258	4.09e-13	1.87e-11	9164.25	7721.2	9121.03	4998.51	7025.09	6128.46	2111.95	1823.63	1675.63	2308.23	3338.56	3305.66	969.496	1063.31	968.479	1142.29	4076.97	2517.29	2405.38
CYYR1	401.644	1.50516	0.214091	7.03655	1.97e-12	3.66e-11	268.409	0.00589817	0.184077	0.0235138	0.98124	1	898.436	785.612	734.103	359.54	387.435	364.089	206.043	501.892	248.343	93.8398	118.03	122.366	173.292	203.498	158.891	128.492	193.426	173.015	140.819
PAPSS1	8888.05	1.11538	0.158585	7.03425	2e-12	3.72e-11	7440.07	0.899074	0.164865	5.4562	4.86e-08	9.52e-07	13057.5	13158.6	12485.6	9934.36	12161.8	12202.6	4449.43	4570.89	5724.17	4806.43	6575.33	7529.95	5800.58	6202.97	5423.73	5833.53	12454.4	10254.6	9937.55
PPAP2B	2621.66	-2.07245	0.295646	-7.0308	2.05e-12	3.81e-11	4010.52	-1.52071	0.215819	-7.04957	1.79e-12	7.44e-11	690.947	791.234	530.509	1415.86	1179.95	1279.97	6207.76	5618.03	4262.76	2065.62	3390.4	4026.85	4380.3	5121.55	5749.08	6317.95	2082.62	1677.15	1827.37
SCN2A	34.4717	2.58528	0.364941	7.02976	2.07e-12	3.83e-11	19.4704	-2.88998	0.528144	-5.27075	1.36e-07	2.43e-06	76.6583	57.6209	126.81	30.8026	40.3403	30.5292	4.17656	6.56926	20.4678	5.72194	6.86947	7.09369	30.4431	34.0939	37.8312	34.6928	0	6.23477	4.91228
UST	905.87	1.42267	0.202328	7.02867	2.09e-12	3.86e-11	666.926	0.332262	0.238383	1.38833	0.165037	0.340727	1619.02	1725.82	1721.83	665.973	1358.96	931.707	441.323	421.747	603.118	470.343	447.14	463.454	446.109	461.334	355.613	456.146	413.143	640.623	569.825
ADH5	4843.1	0.778695	0.110896	7.02138	2.2e-12	4.06e-11	3820.57	0.308484	0.0997139	3.09188	0.00198894	0.0112807	5422.3	5752.25	4438.36	6298.59	7522.62	7427.65	3032.18	3080.99	3700.58	3873.75	3775.71	3792.17	2260.99	2657.2	2380.84	2386.09	3290.12	2944.37	2775.44
OR51B5	12.1538	5.05343	0.674512	7.0206	2.21e-12	4.08e-11	3.69083	-0.624726	1.1674	-0.64536	0.518694	0.711361	30.6633	30.9185	38.3921	10.0905	15.968	19.2221	0	0	0	0	0	0.59114	4.68356	0	0	0	0	1.55869	0
ZNF521	1948.31	-2.35051	0.336748	-7.0126	2.34e-12	4.32e-11	3069.51	-1.07534	0.231274	-4.64817	3.35e-06	4.4e-05	482.437	480.643	229.189	995.241	700.072	728.178	4422.97	4460.53	4165.88	1439.64	2470.51	2804.37	4043.08	4285.18	5291.32	5385.1	1949.29	2397.27	2369.36
MYOM1	192.523	1.81198	0.258575	7.01258	2.34e-12	4.32e-11	160.605	0.00950424	0.366591	0.0248588	0.980168	1	307.656	282.483	316.444	478.502	210.946	196.744	118.336	122.188	92.7874	52.6418	61.2008	70.3457	151.045	145.965	136.192	116.928	76.9949	154.311	180.936
TGFB1I1	1171.05	-0.941553	0.134293	-7.01152	2.36e-12	4.35e-11	1231.02	-0.497271	0.163479	-3.04298	0.00234248	0.0129073	852.441	909.286	878.364	895.93	609.307	667.12	1775.04	1365.09	1507.8	1651.35	1370.77	1570.07	1365.26	1306.22	1389.67	1468.66	903.282	999.122	1027.49
SNX1	4692.58	0.986949	0.140771	7.01084	2.37e-12	4.36e-11	3139.2	0.349042	0.117238	2.97713	0.00290961	0.0154381	7215.08	6490.08	7976.24	5029.85	5456.86	5447.77	2661.86	2757.78	3375.82	3242.05	3310.46	3347.04	2661.43	2928.88	2486.77	2215.2	2895.76	3714.37	3228.19
PARP16	451.04	-0.818671	0.116779	-7.01062	2.37e-12	4.37e-11	516.084	-0.437368	0.124525	-3.50997	0.000448155	0.00322852	426.22	375.239	359.489	285.189	238.68	274.763	746.212	710.794	544.444	492.087	485.859	473.504	658.039	740.478	820.937	805.644	561.499	582.951	532.164
RP11-39K24.4	20.0991	2.38388	0.337051	7.0048	2.47e-12	4.55e-11	9.62625	-0.52576	0.636101	-0.806334	0.420051	0.625452	33.7297	54.8101	34.9019	29.2093	27.734	24.8757	5.56874	9.19697	6.82261	3.43316	4.99598	5.91141	8.19622	5.32718	16.3935	6.4246	0	7.79347	9.00585
VIT	17.8327	3.65067	0.498414	7.00183	2.53e-12	4.64e-11	93.4746	1.37141	0.576094	2.42636	0.0152512	0.0581207	32.7076	57.6209	51.1894	24.4296	16.8085	16.9607	1.39219	2.62771	6.82261	3.43316	0	0	52.69	62.8607	128.626	206.872	619.715	135.606	194.035
NFATC4	2002.91	-2.49005	0.356239	-7.00116	2.54e-12	4.66e-11	3007.63	-1.52432	0.403453	-3.77907	0.000157416	0.00132559	534.564	494.697	321.097	818.392	446.264	687.473	5552.04	4820.53	2995.12	4558.1	1039.16	1767.51	4095.77	4960.67	4677.2	4913.53	1491.07	1466.73	1750.41
AKAP6	337.033	1.1407	0.162913	7.00131	2.54e-12	4.66e-11	213.595	0.485842	0.507479	0.916013	0.35966	0.568229	491.635	594.479	503.751	462.038	384.914	362.959	203.259	212.844	162.378	189.968	249.174	226.998	45.6647	20.2433	64.313	52.6817	9.38962	126.254	55.6726
WNT4	78.387	2.02212	0.288822	6.99533	2.65e-12	4.85e-11	92.6529	2.4795	0.390569	6.3555	2.08e-10	6.33e-09	160.471	127.89	81.4377	89.2212	159.68	140.208	20.8828	24.9632	31.384	54.9306	20.6084	28.9659	29.2722	39.4211	44.1364	50.1119	383.096	163.663	171.111
BMP1	3427.48	-1.19947	0.171455	-6.99459	2.66e-12	4.87e-11	3666.27	-0.393404	0.119848	-3.28415	0.0010229	0.00645858	1833.67	1775.01	2158.1	2290.54	1949.78	2137.05	6159.03	5553.66	6339.56	3981.32	3678.91	3273.14	3443.58	3646.99	4083.25	4283.92	3325.8	2668.48	2829.47
SERPINF2	91.6168	-1.90733	0.272622	-6.99373	2.68e-12	4.9e-11	46.77	-0.513867	0.502965	-1.0515	0.293028	0.498041	35.7739	29.5131	24.4313	53.639	36.1382	46.3592	174.023	130.071	109.162	244.899	103.667	111.726	15.2216	8.52349	20.1766	16.7039	11.2675	3.11739	14.7369
TMEM44	655.888	-1.13636	0.162507	-6.99224	2.71e-12	4.95e-11	467.975	-0.199133	0.226692	-0.889961	0.373487	0.581982	432.353	444.103	369.96	473.191	341.212	377.658	824.174	750.21	830.993	1318.33	875.546	832.917	186.171	257.835	255.991	283.967	170.891	211.982	252.983
CNTN6	42.8258	3.87278	0.543375	6.99122	2.73e-12	4.98e-11	45.3576	-0.112641	0.802382	-0.125665	0.899997	0.958519	129.808	157.403	80.2743	32.9269	37.819	53.1435	2.78437	2.62771	6.82261	10.2995	0	0	69.0824	44.7483	37.8312	35.9778	101.408	10.9108	18.8304
AP000695.6	17.9433	-3.50963	0.486408	-6.98845	2.78e-12	5.08e-11	10.867	-0.214334	1.11218	-0.337639	0.735636	0.867774	1.02211	0	1.1634	3.18647	3.36169	5.65356	32.0203	7.88312	17.7388	32.0429	57.4538	53.7938	0	0	1.26104	0	0	0	0
PGC	17.1818	5.26873	0.704835	6.98494	2.85e-12	5.2e-11	5.72167	0	0.989665	0	1	1	70.5257	30.9185	10.4706	14.8702	32.7765	45.2285	1.39219	0	0	0	0	0	0	0	0	0	0	0	0
PISD	1230.42	0.788123	0.112888	6.98137	2.92e-12	5.33e-11	831.656	-0.0311724	0.136003	-0.235267	0.814001	0.911374	1658.89	1427.87	1344.89	1526.85	1687.57	1713.03	825.566	825.1	1008.38	1015.07	947.987	783.852	362.976	411.258	414.882	388.046	441.312	352.265	368.421
FANCG	462.106	-1.62859	0.233326	-6.97997	2.95e-12	5.38e-11	748.867	-0.687085	0.293329	-2.34153	0.0192047	0.0695672	193.179	179.89	221.045	270.319	211.786	260.064	808.86	609.628	581.286	1211.91	465.875	531.435	778.641	1205.01	921.82	1173.13	659.151	547.101	679.533
C12orf75	412.203	-1.13778	0.163052	-6.97802	2.99e-12	5.45e-11	448.612	-1.04255	0.126362	-8.25047	1.58e-16	1.08e-14	290.28	258.591	160.549	288.376	257.169	283.809	508.148	667.437	563.547	559.606	497.1	611.831	523.387	595.579	528.376	651.454	277.933	283.682	274.269
CACNB3	563.879	-1.3291	0.190593	-6.9718	3.13e-12	5.69e-11	608.704	-1.47791	0.215305	-6.86358	6.72e-12	2.56e-10	445.64	465.183	280.378	312.805	174.808	211.443	1246.01	1112.83	821.442	595.082	546.435	554.49	903.926	991.921	964.696	1033.08	349.294	341.354	348.772
MMP17	899.636	1.90764	0.274084	6.96713	3.23e-12	5.88e-11	432.81	1.81218	0.562177	3.20717	0.00134047	0.00814908	1458.55	1183.34	1244.83	1288.93	1680.85	1691.55	258.947	488.753	626.315	442.878	183.602	247.097	91.3293	207.76	21.4377	16.7039	323.003	403.702	230.877
STK38	2589.88	1.12195	0.161028	6.96643	3.25e-12	5.91e-11	1598.05	-0.144448	0.120632	-1.20023	0.230048	0.425481	3711.29	3767.85	5402.81	2728.15	3041.49	2826.78	1492.42	1480.71	1742.49	1456.81	1755.46	1672.34	1018.67	1105.92	1267.35	1396.71	1059.15	1024.06	1157.66
RILPL2	746.109	-1.2596	0.18085	-6.96382	3.31e-12	6.01e-11	543.366	-0.397007	0.207677	-1.91332	0.0557075	0.157001	487.547	382.266	416.496	437.078	458.871	412.71	853.41	897.361	904.677	1758.92	924.256	1019.72	416.836	446.418	435.059	488.269	300.468	361.617	351.228
RNF157	396.924	-1.68917	0.242798	-6.96238	3.35e-12	6.07e-11	337.013	-1.97379	0.262872	-7.51431	5.72e-14	2.9e-12	165.582	160.214	104.706	268.195	197.499	209.182	815.821	621.452	750.487	402.824	577.66	489.464	258.766	273.817	355.613	420.169	45.0702	84.1694	108.889
LRIG3	2820.01	-1.36596	0.196237	-6.96076	3.38e-12	6.13e-11	5694.38	-0.567176	0.230173	-2.45652	0.0140291	0.0545959	1589.38	1904.3	1059.85	1577.3	1649.75	1596.57	4123.65	4854.69	3471.34	2624.08	4062.98	5326.18	8791.03	9115.87	10522.1	11300.9	5029.08	7296.24	7731.93
SOSTDC1	145.988	2.75428	0.40556	6.96096	3.38e-12	6.13e-11	745.667	-2.3731	0.319593	-7.4076	1.29e-13	6.25e-12	344.452	344.32	203.594	103.56	224.393	246.495	68.2171	101.167	87.3293	12.5883	6.86947	8.86711	1379.31	1555.54	1452.72	1750.06	225.351	305.504	332.398
IPO11	1274.41	1.40738	0.202395	6.95985	3.41e-12	6.16e-11	965.256	0.348616	0.168343	2.0675	0.0386868	0.119402	1955.3	2016.73	2066.19	1315.48	1880.87	1824.97	490.049	553.132	510.331	1024.23	793.112	862.474	564.368	594.513	534.681	660.449	627.227	880.662	740.117
MBL2	8.37381	5.04754	0.6974	6.95991	3.4e-12	6.16e-11	3.81272	0.77748	1.19579	0.547701	0.583897	0.762235	15.3317	14.0539	16.2875	14.8702	21.851	18.0914	0	0	0	0	0	0	0	0	0	0	1.87792	0	0
ARHGEF25	960.957	-1.39085	0.20009	-6.95156	3.61e-12	6.53e-11	1146.68	-0.474535	0.163539	-2.90124	0.00371685	0.0188893	597.935	514.372	303.646	653.227	568.126	497.513	1697.08	1708.01	1401.36	1353.81	1064.77	1171.64	1450.73	1614.13	1223.21	1625.42	1124.88	1100.44	966.082
ZBED3	1203.27	1.40793	0.203141	6.9512	3.62e-12	6.54e-11	647.899	-1.63357	0.206496	-7.92143	2.35e-15	1.4e-13	2370.28	2046.25	2113.89	1034.01	1379.13	1147.67	1145.77	1341.44	931.968	264.354	311.624	352.911	429.716	450.679	610.343	477.99	129.577	207.306	135.088
PLCG2	1052.47	-1.73129	0.249348	-6.95084	3.63e-12	6.55e-11	1112.29	-0.999278	0.137103	-7.28003	3.34e-13	1.54e-11	385.336	487.67	231.516	660.662	509.296	609.454	1889.2	2274.28	1586.94	1230.22	1388.88	1376.17	2020.95	2016.87	2176.55	1756.48	848.822	997.563	1130.64
PHLDB1	9256.75	-0.833176	0.11993	-6.94599	3.76e-12	6.78e-11	7955.71	-0.102905	0.147217	-0.697577	0.485442	0.684414	7251.88	7247.59	6565.04	6878.53	5435.01	5958.85	15612	14573.3	13317.7	8548.57	9594.16	10098.5	10376.4	7914.06	9326.65	8102.7	7440.34	8805.06	8693.1
CEP70	1173.98	1.8266	0.263044	6.94025	3.91e-12	7.05e-11	646.268	-0.330119	0.220532	-1.49641	0.134546	0.296342	2459.2	2803.75	2754.92	798.211	1337.11	1131.84	492.834	412.55	391.618	413.124	556.427	536.164	686.141	633.934	621.693	616.761	364.317	511.251	641.053
ARHGAP4	433.799	-1.74218	0.251076	-6.93989	3.92e-12	7.07e-11	394.87	-0.31274	0.311879	-1.01308	0.311021	0.51839	212.599	122.269	178	271.381	200.861	188.829	587.502	944.66	633.138	955.564	439.646	471.139	213.102	357.986	310.216	336.649	283.567	196.395	251.345
UBE2FP1	173.269	3.25879	0.495365	6.93906	3.95e-12	7.1e-11	92.3445	0.636322	0.314287	2.03151	0.0422031	0.127558	329.12	356.969	458.378	176.318	318.52	234.057	4.17656	5.25541	8.18713	59.5082	74.9397	53.7938	48.0064	77.7768	88.2728	55.2515	99.53	104.432	112.164
SLC14A1	155.855	-2.12789	0.305742	-6.93675	4.01e-12	7.21e-11	37.6022	-1.76753	0.729048	-2.47648	0.0132686	0.0521426	55.194	67.4586	38.3921	48.8592	36.1382	41.8363	367.537	405.981	465.302	74.3852	169.863	99.3116	2.34178	4.26174	5.04416	16.7039	3.75585	0	0.818714
CXCR5	162.027	-2.64093	0.383068	-6.93158	4.16e-12	7.48e-11	229.8	-1.91291	0.675942	-2.8472	0.00441054	0.0217236	5.11056	4.21617	1.1634	154.544	70.5955	40.7056	32.0203	40.7294	39.5711	815.948	324.739	414.981	323.165	347.332	220.682	281.397	0	154.311	49.1228
AC079776.2	18.6882	3.31476	0.467268	6.92958	4.22e-12	7.58e-11	6.48474	0.414187	0.856244	0.477858	0.632752	0.79776	45.995	25.297	58.1698	26.5539	26.0531	21.4835	4.17656	6.56926	8.18713	0	0	1.77342	1.17089	3.19631	0	5.13968	1.87792	4.67608	3.27486
WWTR1	4886.84	-1.52059	0.219535	-6.9266	4.31e-12	7.73e-11	4810.55	0.0659818	0.277041	0.240215	0.810163	0.909125	2377.43	2234.57	2419.86	2522.09	2926.35	2497.74	7423.14	6578.46	7298.82	3395.4	8814.78	10153.4	4687.07	4438.61	4868.88	4539.62	5370.86	4501.51	4694.51
TBCD	3050.99	-1.90949	0.275811	-6.92362	4.4e-12	7.89e-11	2234.64	0.11618	0.327363	0.351624	0.725121	0.860388	1292.97	1151.01	1070.33	1628.29	1069.02	1251.7	6521	5765.19	3682.84	7828.76	2830.22	2520.62	1684.91	2137.26	1703.66	1565.03	1896.7	1798.73	2072.98
PTK7	4798.34	-0.998111	0.144213	-6.9222	4.45e-12	7.97e-11	6614.18	0.092208	0.132075	0.699664	0.484137	0.683222	2712.68	2857.15	2391.94	3769.07	3718.87	3856.86	6962.32	5886.06	4878.16	8628.68	5794.71	6123.62	7859.01	8098.38	7419.96	7839.29	8651.6	8416.94	7901.41
DSC3	452.259	1.67135	0.241776	6.92189	4.46e-12	7.98e-11	224.616	-0.372759	0.242524	-1.55063	0.120991	0.275071	522.299	633.83	786.456	669.69	683.264	814.113	172.631	338.974	345.224	159.07	134.267	167.293	73.766	51.1409	99.6222	62.9611	50.7039	65.4651	49.9415
FAM132B	834.899	-1.66723	0.241546	-6.91826	4.57e-12	8.18e-11	596	-0.164961	0.423608	-0.468317	0.639558	0.802312	131.852	98.3772	141.934	739.793	777.391	639.983	668.249	252.26	504.873	2764.84	1606.21	1693.03	5.85444	22.3742	29.0039	46.2571	35.6806	14.0282	18.8304
RAP1GDS1	1399.58	1.12129	0.162148	6.9159	4.65e-12	8.31e-11	968.292	0.303472	0.179497	1.68777	0.0914562	0.225531	1877.62	2023.76	2024.31	1637.32	1990.12	1962.92	750.388	722.619	863.742	668.322	1145.33	1128.49	631.109	646.72	688.528	728.549	933.328	805.844	760.585
SPRY2	5768.5	-1.66005	0.23893	-6.91493	4.68e-12	8.36e-11	10888.1	0.484095	0.157168	3.08617	0.00202755	0.0114647	273.926	210.808	575.881	3745.7	4815.62	4713.94	1017.69	926.266	837.816	13272.6	19750.4	19081.4	11300.2	13283.9	10242.2	11321.4	14884.4	16899.3	16728
TCHH	39.514	4.93539	0.671178	6.91421	4.7e-12	8.4e-11	20.8788	-1.42365	0.948107	-1.62037	0.105153	0.24935	22.4865	9.83772	160.549	67.447	98.3295	108.548	0	0	0	5.72194	1.249	0	1.17089	1.06544	10.0883	2.56984	0	0	1.63743
FER1L6	22.9941	3.74493	0.52892	6.91331	4.73e-12	8.44e-11	13.0972	2.02094	0.710938	2.80798	0.00498531	0.0240366	35.7739	28.1078	61.66	33.989	63.0317	39.5749	0	0	0	1.14439	4.37148	8.27597	3.51267	1.06544	5.04416	0	11.2675	15.5869	8.18714
FAM188B	244.14	-0.974199	0.140917	-6.91252	4.76e-12	8.49e-11	278.845	-0.36522	0.147058	-2.48561	0.0129331	0.0510698	156.383	132.106	203.594	165.697	160.521	166.215	265.908	320.58	286.549	322.717	373.45	375.965	254.083	278.079	315.26	298.101	174.647	224.452	256.257
PDHX	1459.6	0.836984	0.121103	6.91093	4.81e-12	8.57e-11	1172.09	-0.0984484	0.186387	-0.528464	0.597177	0.771936	2281.35	2207.86	1785.81	1484.37	1805.23	1702.85	1136.02	1066.85	981.091	1134.09	889.909	1039.82	1071.36	1021.75	759.146	920.002	846.944	877.544	916.141
DUSP14	2862.56	0.904065	0.130729	6.91027	4.84e-12	8.61e-11	2612	1.71376	0.160115	10.7021	9.95e-27	1.98e-24	949.541	883.989	1080.8	5563.58	7575.57	6893.95	541.56	563.643	618.128	3765.03	2977.6	2937.38	735.318	794.815	549.813	627.041	2388.72	2060.59	2250.64
C1QTNF5	1998.32	-2.43412	0.353275	-6.90978	4.85e-12	8.63e-11	1165.65	-0.595995	0.430072	-1.41408	0.157337	0.32972	417.021	458.156	415.332	1025.51	536.19	663.728	3577.92	4499.95	4516.56	5139.44	1407.62	1322.38	455.476	653.112	504.416	623.186	497.65	311.739	276.725
ADAMTSL2	1438.51	-3.40102	0.487942	-6.90745	4.93e-12	8.77e-11	212.662	-0.784796	0.272341	-2.91129	0.00359936	0.0183982	80.7468	78.7017	150.078	84.9726	94.9678	85.9341	4815.57	6889.85	4109.94	338.739	254.171	278.427	56.2027	93.7583	66.8351	111.788	65.7273	34.2912	43.3918
TMEM216	997.068	-1.03328	0.149707	-6.90367	5.07e-12	9e-11	895.704	0.274598	0.175598	1.56411	0.117791	0.269911	534.564	510.156	514.221	741.386	870.678	786.975	1094.26	1211.37	1365.89	1874.51	1270.85	1189.97	718.926	932.256	709.966	814.639	997.178	1061.47	830.995
PTPLA	238.8	1.49269	0.216289	6.90296	5.09e-12	9.04e-11	179.646	2.02176	0.356527	5.66602	1.46e-08	3.14e-07	273.926	217.835	410.679	467.88	384.914	357.305	84.9233	69.6342	128.265	196.835	127.397	146.012	19.9051	58.599	42.8754	51.3968	298.59	121.578	127.719
HMOX1	3431.99	1.29658	0.187775	6.90107	5.16e-12	9.15e-11	2740.29	0.71869	0.216913	3.30295	0.000956729	0.00610303	923.989	837.611	1056.36	6989.53	9705.2	10138	505.363	270.654	413.45	4480.28	2853.95	3009.5	467.185	646.719	370.746	435.588	721.123	833.901	821.989
TMCC3	140.178	1.915	0.277986	6.89889	5.24e-12	9.28e-11	145.906	2.65953	0.515277	5.13302	2.85e-07	4.73e-06	207.489	393.509	212.902	182.16	187.414	133.424	109.983	86.7143	72.3196	14.877	39.9678	41.3798	8.19622	14.9161	22.6987	16.704	214.083	63.9064	49.9416
MFI2	20001.1	2.61285	0.38428	6.89896	5.24e-12	9.28e-11	11208.6	1.73525	0.232045	7.48556	7.12e-14	3.58e-12	37512.5	32030.2	65613.2	18250.5	25699.3	27624.4	3520.84	2307.13	2059.06	7903.14	8985.27	8507.1	4192.95	4251.09	3996.24	3730.12	20726.7	10128.4	10046.4
SLC16A9	1828.34	2.97462	0.451632	6.89431	5.41e-12	9.58e-11	1095.13	-0.231022	0.228838	-1.01688	0.309211	0.516507	3232.94	3649.79	1990.57	3307.03	3402.03	3380.83	573.581	1199.55	888.303	52.6418	117.406	145.421	499.969	459.203	530.898	411.174	351.172	419.288	438.831
SNED1	2188.29	-1.77275	0.257476	-6.89129	5.53e-12	9.77e-11	3147.06	-1.19965	0.28607	-4.17567	2.97e-05	0.000308531	792.136	685.829	757.371	1733.97	932.869	1048.17	4691.67	2910.18	2321.05	2087.36	4700.59	3598.27	6642.45	6118.8	6003.81	5189.79	2199.05	2635.75	2918.72
MTSS1L	7402.35	1.25311	0.181995	6.88457	5.8e-12	1.02e-10	7297.09	0.326203	0.185477	1.764	0.077732	0.20043	11563.1	8394.38	6703.49	11402.8	12131.5	12743.1	4421.58	4524.91	3223	3248.92	5298.24	5173.07	8477.24	8326.38	8330.43	7620.86	8908.87	11211.7	10739.1
DLX6	51.0229	2.93669	0.429992	6.88573	5.75e-12	1.02e-10	85.3377	2.80473	0.328454	8.55531	1.18e-17	9.06e-16	75.6362	106.81	191.96	33.458	78.9997	45.2285	26.4515	10.5108	35.4775	2.28877	2.49799	2.9557	49.1773	63.9261	40.3533	39.8325	302.346	372.528	379.883
GPR34	46.4135	4.56508	0.641331	6.87888	6.03e-12	1.06e-10	18.2774	-0.992789	0.919215	-1.30301	0.192571	0.377874	93.0121	106.809	265.254	18.5878	41.1807	26.0064	0	0	0	0	3.74699	2.36456	5.85444	2.13087	2.52208	0	0	0	1.63743
CRISPLD1	3641.33	1.8035	0.262313	6.87849	6.05e-12	1.07e-10	5565.6	0.675595	0.313109	2.16542	0.0303559	0.0990858	4204.97	4771.29	7296.82	4274.12	7445.3	6118.28	1628.86	2115.3	1806.63	650.012	1495.05	1889.29	6133.11	5773.6	5814.66	6159.9	11932.3	8596.19	8368.08
CD1D	248.871	2.96013	0.450133	6.87851	6.05e-12	1.07e-10	128.386	1.0716	0.490723	2.15642	0.0310509	0.100832	381.248	355.563	425.803	347.857	525.264	517.866	16.7062	3.94156	12.2807	139.615	125.524	134.78	4.68356	5.32718	5.04416	7.70952	30.0468	6.23477	5.731
MMP1	725.902	-3.73764	0.621267	-6.87602	6.15e-12	1.08e-10	448.161	2.71436	0.566879	4.6912	2.72e-06	3.65e-05	4.08845	5.62155	5.81698	148.702	292.467	205.79	1534.19	162.918	657.699	1861.92	1834.15	1997.46	2.34178	3.19631	1.26104	5.13968	52.5819	14.0282	9.00585
PINLYP	163.69	-1.99655	0.290043	-6.87631	6.14e-12	1.08e-10	99.8324	-1.16814	0.366201	-3.19073	0.00141912	0.00856443	48.0392	54.8101	29.0849	103.029	49.5849	87.0648	171.239	181.312	141.91	608.814	275.403	213.993	119.431	132.114	124.843	105.363	48.826	56.1129	52.3977
CYTH3	1702.79	-1.4831	0.215615	-6.87591	6.16e-12	1.08e-10	1859.89	0.113374	0.217447	0.523285	0.600776	0.774907	908.657	839.017	760.861	1101.99	712.678	824.289	3250.75	3360.84	3248.92	1221.06	2139.53	2064.85	2150.92	2054.16	2221.95	2256.32	1778.39	2537.55	2730.41
NFATC2IP	1733.15	-0.808365	0.117587	-6.87424	6.23e-12	1.09e-10	1223.19	-0.578813	0.218294	-2.65504	0.00792992	0.0348115	1390.07	1247.98	1400.73	1228.92	1058.93	1190.64	2532.39	2609.31	2383.82	1557.51	2309.39	1888.1	1204.85	1012.16	1061.8	1138.44	443.19	759.083	997.194
GLUD2	22.1982	2.41256	0.348333	6.86925	6.45e-12	1.13e-10	14.4067	-0.913069	0.709538	-1.37811	0.168171	0.344979	26.5749	35.1347	32.5751	33.458	58.8296	40.7056	2.78437	3.94156	10.9162	5.72194	6.86947	8.86711	5.85444	3.19631	5.04416	5.13968	3.75585	1.55869	1.63743
SIX2	2840.5	-1.44382	0.210109	-6.86873	6.48e-12	1.14e-10	1585.97	-0.205141	0.220149	-0.946835	0.343723	0.551708	1811.18	1686.47	893.488	1595.36	1408.55	1356.85	5497.74	5371.03	5591.81	3118.46	2738.42	3016.59	415.666	573.204	759.146	899.444	651.64	575.158	492.047
DBX2	46.6163	2.9184	0.42805	6.86635	6.59e-12	1.15e-10	27.999	-1.55253	0.549746	-2.79423	0.00520236	0.024878	77.6805	120.863	67.477	71.1646	70.5955	81.4112	6.96093	31.5325	20.4678	5.72194	3.74699	1.77342	25.7596	35.1594	39.0922	25.6984	0	15.5869	13.0994
NPIPP1	1562.3	-1.67805	0.244823	-6.8583	6.97e-12	1.22e-10	1729.39	-0.687396	0.243985	-2.8176	0.00483834	0.0234483	593.847	787.017	416.496	944.258	917.742	764.361	3132.42	2434.57	2202.34	3282.1	1681.15	1591.35	1965.92	2151.11	2407.33	2460.62	1186.85	1451.14	1522.81
RPL22L1	1073.29	1.44649	0.211107	6.85523	7.12e-12	1.25e-10	1337.89	0.763735	0.274541	2.7911	0.00525297	0.025061	1739.63	1783.44	1492.64	1131.73	1656.47	1593.17	701.662	583.351	854.19	647.723	402.801	292.615	1293.83	1769.69	1268.61	1654.98	3098.57	2437.8	2158.95
SHF	222.036	-1.64713	0.240266	-6.85388	7.19e-12	1.26e-10	204.238	-2.10065	0.317257	-6.62453	3.48e-11	1.21e-09	145.14	108.215	57.0064	108.871	113.457	99.5026	349.439	345.543	275.633	516.119	296.636	248.87	222.469	303.649	185.373	232.57	60.0936	40.526	58.9474
CACNA1G	482.83	-2.28493	0.330783	-6.84998	7.39e-12	1.29e-10	1008.18	-3.442	0.250935	-13.706	9.34e-43	6.24e-40	141.051	219.241	112.849	85.5037	62.1913	68.9734	1997.79	1651.51	866.471	170.514	186.725	231.136	1165.03	1174.11	1650.7	1601.01	108.92	98.1977	162.924
PGM2L1	795.738	-1.26061	0.183992	-6.84968	7.4e-12	1.29e-10	720.621	-1.35539	0.255012	-5.31699	1.05e-07	1.93e-06	400.668	423.022	361.816	555.508	532.828	486.206	1026.04	742.327	835.087	847.991	1678.03	1659.33	723.609	599.84	865.073	734.974	185.915	339.795	317.661
KCTD6	285.943	-0.99448	0.145295	-6.84933	7.42e-12	1.29e-10	175.633	-0.479215	0.231383	-2.07165	0.0382985	0.118586	335.252	324.645	252.457	101.967	82.3614	87.0648	565.227	487.439	577.192	175.091	218.574	224.042	187.342	183.255	175.285	271.118	200.938	104.432	135.906
SLC23A3	186.579	-1.16163	0.169614	-6.84735	7.52e-12	1.31e-10	84.8447	-1.41092	0.302416	-4.6632	3.11e-06	4.13e-05	150.25	137.728	148.915	94.532	73.1168	76.8884	341.086	404.667	271.54	222.011	180.48	137.736	86.6458	93.7583	123.582	79.665	35.6806	28.0565	40.9357
TXNDC15	2886.96	-0.841425	0.122964	-6.84287	7.76e-12	1.35e-10	2663.08	0.28332	0.123987	2.28485	0.0223214	0.078024	2405.03	2268.3	1797.45	2011.73	1949.78	1956.13	3170.01	3882.44	4452.43	3673.48	3134.98	3941.73	2013.93	2571.96	2356.88	2041.74	2959.61	2833.7	2421.76
KRBOX1	17.4762	-3.62098	0.509936	-6.84082	7.87e-12	1.37e-10	39.1663	0.518159	0.479029	1.1339	0.256835	0.457859	3.06633	0	5.81698	1.59324	0.840423	1.13071	36.1968	51.2403	17.7388	32.0429	17.4859	42.5621	49.1773	95.8892	44.1364	53.9666	138.966	68.5825	64.6784
CTDSP1	3358.39	-0.866154	0.126608	-6.84018	7.91e-12	1.38e-10	3480.83	-0.28039	0.141838	-1.9741	0.04837	0.141809	2626.83	2317.49	2877.08	2320.28	1964.07	1987.79	4855.94	5032.06	5972.51	3094.42	3188.68	4063.5	4690.58	5472.08	4551.09	4871.13	4078.85	4063.51	3948.66
KAT2B	1407.3	1.82281	0.267028	6.83941	7.95e-12	1.38e-10	999.928	-0.19226	0.327734	-0.59023	0.555036	0.740172	2053.42	2240.19	1752.07	2417.47	2448.99	2213.93	666.857	800.136	1002.92	214	530.198	547.396	522.216	533.783	836.07	931.567	839.432	470.725	538.714
TBC1D9B	6292.14	-0.654638	0.0957237	-6.83882	7.98e-12	1.39e-10	5243.51	-0.0778557	0.122171	-0.638566	0.523105	0.714846	5274.09	4455.08	5203.87	5380.36	4426.51	4562.42	7730.81	7801.66	7922.41	8275.07	7778.12	6695.26	4860.36	4464.18	4738.99	4772.19	4830.02	4191.32	4362.93
F2R	4893.36	1.01017	0.147797	6.83524	8.19e-12	1.42e-10	2605.74	-3.84498	0.374041	-10.2753	9.1e-25	1.49e-22	6348.33	6570.19	5889.11	5372.39	7520.94	7553.15	2359.76	3007.41	3366.27	2905.6	4213.48	3613.64	235.349	285.537	567.468	660.449	18.7792	18.7043	40.9357
MPZ	67.9782	1.43852	0.210482	6.83515	8.19e-12	1.42e-10	67.2906	-0.460462	0.33212	-1.41343	0.157529	0.330029	115.499	113.836	150.078	64.2605	62.1913	82.542	47.3343	67.0065	51.8518	20.599	17.4859	23.0545	50.3482	36.2248	29.0039	23.1286	30.0468	26.4978	20.4678
GRIK4	151.547	2.9515	0.443317	6.83445	8.23e-12	1.43e-10	161.881	0.690448	0.247184	2.80727	0.00499639	0.0240605	386.358	331.672	108.196	231.55	275.659	245.364	103.022	51.2403	55.9454	9.1551	5.62048	14.7785	158.07	186.451	153.847	201.732	200.938	321.091	327.486
TP53INP2	3153.46	0.75118	0.109898	6.83249	8.35e-12	1.45e-10	3014.67	0.651171	0.155343	4.19385	2.74e-05	0.000287418	1194.85	1141.18	1501.94	6874.28	6742.71	6711.91	700.269	851.377	906.042	3722.69	3815.06	3679.26	1746.97	1454.32	1136.2	1193.69	2204.68	1823.67	2497.08
AC011899.10	12.5484	5.16797	0.742408	6.83215	8.37e-12	1.45e-10	3.40789	2.73444	1.1254	2.43239	0.0149996	0.05739	16.3538	25.297	63.9868	5.84187	21.0106	18.0914	0	0	0	0	0	0	0	0	0	0	3.75585	1.55869	4.91228
ERCC3	1797.47	-0.684296	0.100186	-6.83012	8.48e-12	1.47e-10	1734.96	-0.300737	0.101438	-2.9652	0.00302483	0.0158967	1419.71	1200.2	1404.22	1427.54	1428.72	1360.25	2469.74	2451.65	2348.34	1861.92	2150.77	2046.53	1684.91	1984.91	1948.31	1919.67	1404.69	1510.37	1661.99
BMP8A	147.234	3.60769	0.559295	6.82975	8.51e-12	1.47e-10	64.4369	1.60822	0.610298	2.6211	0.00876471	0.0377249	188.069	157.404	578.208	157.199	300.031	260.064	5.56874	1.31385	2.72904	73.2408	29.9759	13.0051	8.19622	7.45805	13.8714	6.4246	37.5585	24.9391	27.0176
ZNF337	876.48	-0.705924	0.103391	-6.82743	8.65e-12	1.49e-10	746.705	-0.441621	0.196921	-2.24374	0.0248494	0.0846723	664.372	683.019	785.292	697.306	582.413	564.225	1258.54	1219.26	1177.58	1064.28	932.999	888.484	788.008	840.629	861.29	773.521	600.936	595.421	601.755
PNP	4516.54	-1.50495	0.219244	-6.82681	8.68e-12	1.5e-10	4367.52	-0.433874	0.158779	-2.73634	0.0062126	0.0286773	465.061	476.427	802.743	2983.07	3334.8	3433.97	1173.61	1023.49	1361.79	15531.6	12528	11083.9	1720.04	2193.73	2102.15	2438.78	1866.66	1402.82	1422.11
TRAF4	1890.83	0.851463	0.124724	6.8256	8.76e-12	1.51e-10	4047.86	0.0265003	0.125013	0.220033	0.825845	0.916922	1850.02	1332.31	1699.72	2899.69	3375.14	3553.83	1076.16	978.82	825.535	1766.93	1563.12	1768.69	6771.25	7891.68	6303.94	6610.91	6052.55	7978.95	7049.13
SERPINA3	18696.1	-1.95583	0.290687	-6.82348	8.89e-12	1.53e-10	14442.7	1.13792	0.233581	4.88929	1.01e-06	1.5e-05	1607.78	1686.47	1667.15	15326.9	20823.2	18068.8	13873.1	6581.09	14740.9	52763.1	34157.5	43056.9	4636.72	5245.14	3073.16	3257.27	12001.8	7544.07	7501.88
SCML2	468.557	-1.37842	0.202097	-6.82005	9.1e-12	1.57e-10	604.345	0.0501446	0.142951	0.353689	0.723572	0.859638	324.009	285.294	155.895	297.935	266.414	213.705	760.133	861.888	521.247	739.274	594.522	602.372	789.179	789.488	756.624	696.426	717.367	813.638	821.17
FGF2	1354.21	-2.06145	0.302564	-6.81806	9.23e-12	1.59e-10	2101.99	-2.48992	0.301521	-8.25552	1.51e-16	1.04e-14	486.525	467.994	157.058	761.567	673.179	541.611	2088.28	1997.06	1417.74	1154.69	2943.26	3561.62	3537.26	3335.88	4363.2	4115.6	488.26	679.59	821.989
CDCA5	272.242	-1.22432	0.179679	-6.81311	9.55e-12	1.64e-10	856.75	-0.530809	0.275986	-1.91175	0.0559078	0.157453	158.427	108.215	172.183	192.25	149.595	188.829	421.832	299.558	292.007	527.563	339.102	417.345	1481.17	1510.79	1611.61	1769.33	516.429	1352.94	1423.74
ZNF385A	1760	-1.33851	0.196489	-6.81019	9.75e-12	1.68e-10	1488.78	-0.871417	0.299312	-2.92651	0.00342794	0.0176344	590.78	615.56	364.143	1478.52	1431.24	1377.21	1566.21	1074.73	1228.07	5350.01	3237.39	2806.14	387.564	401.669	732.664	887.879	353.05	279.006	342.222
CDK1	611.772	-1.2567	0.184554	-6.81009	9.75e-12	1.68e-10	1371.82	-0.470072	0.237157	-1.97832	0.0478929	0.140667	289.257	330.266	212.901	423.27	442.903	466.984	877.077	617.511	609.941	686.633	1148.45	1236.08	1920.26	1882.62	2055.49	2274.31	912.671	1698.97	1774.15
CLSTN1	5992.78	-0.843774	0.123997	-6.80488	1.01e-11	1.74e-10	6206.34	-0.0350274	0.131354	-0.26555	0.790586	0.899135	4877.52	4276.6	4326.67	3850.32	4138.24	4231.12	7335.43	7494.22	8288.1	9721.57	6256.84	7116.74	6800.52	7385.6	7100.92	7273.93	6811.23	7129.46	6966.44
LRRC17	402.536	-1.40185	0.206937	-6.79105	1.11e-11	1.91e-10	545.807	-3.51995	0.33539	-10.474	1.14e-25	2.02e-23	336.275	358.374	414.169	93.4699	139.51	92.7184	864.547	604.372	723.196	453.177	407.172	343.453	256.425	350.528	477.934	627.041	33.8026	21.8217	46.6667
NME5	75.1649	1.52673	0.224679	6.79	1.12e-11	1.92e-10	42.3154	1.3628	0.416728	3.25846	0.00112019	0.00698444	104.255	161.62	102.379	95.5942	99.1699	111.94	23.6672	38.1017	57.3099	30.8985	36.8454	40.1976	5.85444	8.52349	7.56624	5.13968	24.413	15.5869	16.3743
GHR	1326.74	1.30874	0.193059	6.78789	1.14e-11	1.95e-10	1112.19	-0.376404	0.195456	-1.92379	0.0543808	0.154355	1912.37	2455.21	2158.1	1421.17	1506.04	1689.28	987.06	1194.29	1177.58	313.562	545.186	560.992	1335.98	1189.03	1397.23	1175.7	976.52	983.535	980.819
TMCO4	581.136	1.53671	0.226727	6.78528	1.16e-11	1.98e-10	354.718	0.975723	0.257341	3.78421	0.000154197	0.00130292	802.357	742.045	924.9	857.161	863.955	962.236	121.12	241.749	267.446	514.974	332.233	343.453	64.3989	101.216	92.0559	156.76	236.618	166.78	211.228
LIF	18268.4	-2.09162	0.313934	-6.78343	1.17e-11	2.01e-10	16539.9	1.33913	0.147637	9.06934	1.2e-19	1.17e-17	20.4422	7.02694	26.7581	15416.2	13982.1	16601.1	90.4921	48.6126	197.856	46243.6	68491.1	58096.1	1211.87	1338.19	1191.68	1290.06	3346.46	3037.89	3197.9
R3HDM1	1548.27	0.734214	0.108226	6.78298	1.18e-11	2.01e-10	1628.45	-0.0556316	0.171135	-0.320261	0.74877	0.874982	2275.22	2518.46	2460.58	1595.36	1491.75	1355.72	1222.34	1337.5	1386.35	853.713	1099.74	982.476	2687.19	2160.7	2334.19	1872.13	1667.6	2188.4	2670.64
PDXDC1	9203.25	0.94314	0.139079	6.78139	1.19e-11	2.03e-10	7146.64	0.195159	0.166104	1.17914	0.238341	0.436019	15460.5	14132.6	14210.9	9196.16	9869.08	9864.33	8051.01	8390.26	6372.31	3543.02	5591.75	5757.12	9033.41	8047.24	7643.16	6880.74	7996.2	9285.13	9882.7
HRCT1	305.61	-1.92119	0.284304	-6.77484	1.25e-11	2.13e-10	154.181	-1.44864	0.411723	-3.5217	0.000428791	0.0031147	74.6141	59.0263	100.052	156.668	205.063	193.352	471.951	369.193	517.154	826.248	320.992	373.01	30.4431	53.2718	75.6624	80.9499	16.9013	21.8217	23.7427
MLC1	1061.47	2.95692	0.466739	6.76859	1.3e-11	2.22e-10	683.607	1.76766	0.318679	5.5766	2.45e-08	5.06e-07	2463.29	1907.11	1380.95	1237.94	1855.65	1934.65	510.932	846.121	468.031	49.2087	29.9759	53.7938	504.653	571.074	322.826	204.302	1305.16	1518.17	1392.63
A1CF	32.2478	4.78346	0.65101	6.76433	1.34e-11	2.28e-10	2.34607	-0.397406	1.19612	-0.457521	0.647297	NA	74.6141	92.7556	183.817	10.0905	7.5638	14.6992	0	0	0	3.43316	0	0	2.34178	0	0	0	0	0	0
RNF149	1275.12	-0.744702	0.110099	-6.76361	1.35e-11	2.29e-10	1286.78	-0.0404447	0.110031	-0.369997	0.711385	0.851561	895.37	854.476	841.135	1057.38	981.614	1062.87	1649.74	1300.71	1193.96	2025.57	1769.2	1669.38	874.654	916.275	875.162	920.002	781.216	935.216	893.217
SYN3	55.2291	2.03583	0.3008	6.76011	1.38e-11	2.35e-10	43.031	-0.446086	0.495361	-0.8836	0.376912	0.585087	54.1719	28.1078	52.3528	90.8145	171.446	140.208	15.314	5.25541	9.55165	28.6097	24.3554	42.5621	7.02533	53.2718	35.3091	35.9778	26.2909	24.9391	21.2866
SYF2	1054.23	-0.832433	0.123154	-6.75936	1.39e-11	2.36e-10	1079.63	-0.404464	0.171513	-2.35922	0.0183132	0.066943	619.399	695.667	700.365	798.211	969.007	762.1	1282.2	1182.47	1215.79	1804.7	1245.87	1374.99	987.059	1055.85	1314	1391.57	985.91	843.253	858.831
HAPLN1	159510	1.71813	0.254376	6.75608	1.42e-11	2.41e-10	158881	1.39002	0.326196	4.29159	1.77e-05	0.000196632	226490	254625	281645	174937	272404	263762	73035.5	77391.2	101384	26143.5	78930.9	83373.3	135105	135034	118982	113632	453327	286676	273712
TNFRSF10A	119.181	-1.34522	0.199095	-6.75057	1.47e-11	2.5e-10	79.3217	0.029015	0.465679	0.0259122	0.979327	1	47.0171	40.7563	50.026	87.628	78.9997	85.9341	122.512	98.539	80.5067	175.091	272.905	290.25	4.68356	10.6544	39.0922	16.704	22.5351	14.0282	17.193
GH1	22.2029	-4.62545	0.635665	-6.74667	1.51e-11	2.57e-10	3.47053	-3.04546	1.00963	-3.02764	0.00246468	0.0134897	0	0	0	1.06216	0.840423	0	80.7468	99.8528	62.768	12.5883	5.62048	2.9557	4.68356	7.45805	5.04416	3.85476	0	0	0
PRSS51	14.4263	3.10258	0.448187	6.74534	1.53e-11	2.59e-10	13.3258	-0.315199	0.543747	-0.583325	0.559675	0.744127	17.3759	25.297	25.5947	25.4918	35.2978	29.3985	2.78437	0	0	3.43316	3.12249	5.32027	17.5633	7.45805	16.3935	6.4246	11.2675	6.23477	10.6433
SYTL5	27.6354	3.84527	0.561011	6.74171	1.57e-11	2.65e-10	16.0483	1.13199	1.01662	1.09474	0.273629	0.476645	56.2161	51.9994	60.4966	83.9104	24.3723	36.1828	0	6.56926	9.55165	1.14439	0	1.18228	0	2.13087	2.52208	0	11.2675	0	0
IGFBP7	10185.7	-2.25584	0.335876	-6.73934	1.59e-11	2.69e-10	4308.56	1.16362	0.331036	3.48811	0.000486458	0.00346397	2261.93	1895.87	2804.95	4062.22	4146.65	4145.19	18896.1	22664	29692	16302.9	6688.37	8667.89	580.761	932.256	291.3	508.828	1440.37	1437.12	1051.23
ADCY3	782.114	-1.17675	0.174611	-6.73976	1.59e-11	2.69e-10	802.937	-0.875403	0.18132	-4.82826	1.38e-06	1.97e-05	526.387	317.618	309.463	583.656	519.381	616.238	970.354	966.996	811.89	1574.68	1212.15	976.564	1023.36	1011.1	1069.36	953.41	593.424	606.332	458.48
RGS22	217.414	1.4164	0.21	6.73641	1.62e-11	2.74e-10	115.57	0.0828346	0.246635	0.340446	0.733521	0.866067	381.248	382.266	617.763	169.414	154.638	238.58	142.003	122.188	139.181	75.5296	98.6706	87.4888	100.696	107.609	90.7949	87.3745	73.239	123.137	108.889
CASK	3330.69	1.67525	0.248628	6.73669	1.62e-11	2.74e-10	2166.21	-0.226638	0.253587	-0.899992	0.368125	0.576682	5832.17	5273.02	8866.24	2656.46	4524.84	3768.66	1478.5	1535.89	1215.79	1094.03	1864.12	1858.55	1688.42	1480.96	1733.93	2018.61	1915.48	1223.57	1287.84
KYNU	36.2953	2.83926	0.421349	6.73601	1.63e-11	2.75e-10	23.0284	1.22826	0.866549	1.38436	0.166248	0.342468	20.4422	28.1078	65.1502	92.9388	83.2018	91.5877	1.39219	0	4.09356	19.4546	14.9879	14.1874	0	0	3.78312	2.56984	15.0234	0	0
ST6GALNAC6	2331.52	-0.698353	0.1037	-6.7345	1.64e-11	2.78e-10	2368.66	0.352652	0.135174	2.61046	0.00904209	0.0386696	1938.94	1567.01	1369.32	1895.95	2024.58	1874.72	2759.31	2676.32	2868.22	3181.4	2938.26	2884.18	1991.68	2718.99	2211.86	2519.73	3551.15	2931.9	2579.77
ZC3H12C	2034.55	2.08605	0.309733	6.73114	1.68e-11	2.84e-10	2095.47	-0.430223	0.385862	-1.11428	0.26516	0.467247	1431.98	1606.36	1563.61	4168.97	5595.53	5653.56	384.243	312.697	377.972	273.509	1637.43	1408.69	1799.66	1453.25	1759.15	1460.95	1034.74	1262.54	1276.38
GRIN2D	1033.98	-1.67146	0.248353	-6.73013	1.7e-11	2.85e-10	510.417	-1.45364	0.274861	-5.29401	1.2e-07	2.16e-06	555.006	451.13	252.457	569.316	459.711	529.173	2368.11	2082.46	1765.69	1102.05	1035.42	1237.26	359.463	346.267	288.778	259.554	50.7039	144.958	137.544
DKFZP761J1410	1473.89	-0.868156	0.128996	-6.73037	1.69e-11	2.85e-10	1009.73	0.268196	0.14575	1.83832	0.0660149	0.177657	1328.74	950.042	1414.69	850.257	827.816	887.609	2213.58	2071.95	2331.97	1884.81	1378.27	1547.01	706.046	843.825	742.753	773.522	837.554	919.629	1008.66
OPRD1	67.9821	-2.73442	0.405311	-6.72939	1.7e-11	2.87e-10	41.8303	1.82067	0.607215	3.00271	0.00267588	0.014406	29.6412	22.4862	10.4706	16.4634	5.88296	12.4378	126.689	191.823	115.984	22.8877	116.781	144.238	29.2722	14.9161	11.3494	7.70952	26.2909	82.6107	74.503
MSANTD3	1320.88	-1.11469	0.165604	-6.72721	1.73e-11	2.91e-10	1048.86	-0.0484778	0.151709	-0.322586	0.747008	0.87422	552.962	625.398	457.215	1245.38	1058.93	896.654	1355.99	876.34	926.51	3017.75	2526.09	2311.36	613.546	582.793	592.689	695.141	565.255	639.064	595.205
PTPN13	1445.44	1.77574	0.264198	6.72409	1.77e-11	2.97e-10	1213.05	0.0951272	0.282137	0.341335	0.732852	0.865508	2372.32	3101.69	2711.88	2082.36	1806.07	1482.36	508.148	656.927	455.75	354.76	928.628	884.346	1662.66	919.471	1335.44	1324.75	1376.52	1303.07	1526.08
ATXN7L2	232.844	-1.51641	0.225917	-6.71593	1.87e-11	3.14e-10	429.606	-0.767583	0.197159	-3.88924	0.000100558	0.000900451	81.7689	54.8101	95.3985	183.753	142.031	171.868	206.043	361.31	207.407	573.338	397.18	319.216	679.115	678.683	704.921	733.689	484.504	391.232	356.959
MRPL3	3094.09	0.565018	0.0841621	6.71332	1.9e-11	3.19e-10	2666.58	0.601236	0.135082	4.45106	8.54e-06	0.000102601	3722.53	4344.05	3841.53	3124.87	3538.18	3620.54	2421.01	2546.25	2652.63	2363.16	2499.86	2454.42	2068.96	2232.09	2007.58	2188.22	3834.72	3192.2	2666.55
NUCB2	3086.59	-0.794244	0.118443	-6.70578	2e-11	3.36e-10	2839.5	0.643192	0.146596	4.38882	1.14e-05	0.000132519	2146.43	2137.6	2204.64	2169.99	2498.58	2371.1	3537.54	3912.65	4352.82	4825.88	3414.75	3467.04	2317.19	2398.3	2469.12	2329.56	3857.26	3782.95	3527.02
TEP1	2383.28	-0.872153	0.130099	-6.70218	2.05e-11	3.44e-10	1474.93	-0.714621	0.295613	-2.43682	0.014817	0.0568394	1455.49	1311.23	1353.03	2287.89	1579.15	1943.69	2455.82	2142.89	2185.96	3810.81	4530.11	3543.3	405.127	448.548	553.597	256.984	122.065	307.062	317.661
BCL2L13	2408.02	0.991902	0.148032	6.70072	2.07e-11	3.47e-10	1599.87	0.281476	0.161984	1.73592	0.0825772	0.209469	3316.75	3142.45	3701.93	2664.95	3380.18	3057.44	1424.21	1412.39	1670.17	1266.84	1814.17	2044.76	1121.71	1073.96	965.957	1087.04	1359.62	1256.31	1261.64
FEZ1	663.29	-0.957046	0.14284	-6.69995	2.08e-11	3.49e-10	470.036	-2.79195	0.352858	-7.91366	2.5e-15	1.48e-13	397.601	344.32	373.45	546.48	525.264	506.559	721.152	713.422	732.748	1358.39	770.63	969.471	69.0824	182.19	141.237	205.587	15.0234	24.9391	19.6491
ANK2	1403.05	1.34698	0.201047	6.69993	2.09e-11	3.49e-10	1709	-2.01686	0.285175	-7.09023	1.34e-12	5.63e-11	1483.08	1812.95	2025.47	2680.35	2064.92	2057.9	537.384	677.948	813.255	552.739	876.17	1254.4	1052.63	1113.38	1525.86	1757.77	287.322	364.734	332.398
GFRA2	74.2407	-1.82439	0.27192	-6.69869	2.1e-11	3.51e-10	102.695	-0.172893	0.335407	-0.510159	0.60994	0.781605	47.0171	28.1078	32.5751	25.4918	19.3297	31.6599	200.475	81.4589	193.762	72.0964	75.5642	83.3508	138.165	200.302	108.449	83.5198	84.5066	168.339	100.702
MDH1	4414.84	0.980691	0.14647	6.69813	2.11e-11	3.52e-10	3840.8	0.322041	0.157788	2.0412	0.0412306	0.125222	5112.6	4998.97	5463.31	5859.39	6632.62	6803.49	2245.6	2007.57	2419.3	4847.63	3384.78	3202.8	2895.61	3691.73	2882.74	3362.63	4259.13	4072.86	3716.14
LTC4S	101.822	-2.72018	0.402238	-6.69725	2.12e-11	3.54e-10	44.4156	0.00292206	0.527266	0.0229038	0.981727	1	45.995	30.9185	17.4509	14.8702	1.68084	9.0457	271.476	420.433	276.998	73.2408	23.1064	36.6507	42.152	61.7953	68.0962	69.3856	67.6053	54.5543	60.5848
FAT2	143.781	-3.48287	0.541879	-6.69662	2.13e-11	3.56e-10	100.082	-0.3829	0.471859	-0.870422	0.38407	0.591457	3.06633	8.43233	3.49019	24.9607	17.6489	28.2678	508.148	299.558	551.266	80.1071	78.0622	122.366	31.614	12.7852	23.9598	37.2627	37.5585	9.35216	13.9181
TNC	14653.5	1.60784	0.240058	6.69643	2.14e-11	3.56e-10	8008.3	-2.75486	0.266692	-10.3572	3.88e-25	6.64e-23	23402.3	22805.2	39528.7	17441.2	12385.3	17882.2	9478	10951	6077.58	3121.89	7429.02	5339.77	3064.22	3103.61	4646.93	3920.29	512.673	486.312	587.837
SGIP1	196.046	-1.69334	0.253267	-6.68463	2.32e-11	3.86e-10	141.382	-3.92527	0.653608	-5.17225	2.31e-07	3.9e-06	74.6141	91.3502	72.1306	171.538	54.6275	80.2805	270.084	308.755	248.343	251.765	379.695	349.364	48.0064	30.8976	35.3091	29.5531	0	0	2.45614
RGL2	1810.26	-1.21325	0.181623	-6.68308	2.34e-11	3.89e-10	2699.16	-0.633499	0.175517	-3.60953	0.000306752	0.00235961	745.119	629.614	659.646	1495.52	1483.35	1619.18	1350.42	2283.48	1558.28	4508.89	2825.85	2563.78	3022.06	3537.25	3365.72	3572.08	2176.51	2291.28	2043.51
TMEM109	2392	-1.16325	0.174107	-6.67909	2.4e-11	4e-10	2464.71	-0.270357	0.203802	-1.33047	0.183364	0.365998	1144.76	1052.64	1437.96	1644.75	1759	1620.31	2322.17	2261.14	2719.49	5933.65	3153.09	3655.02	1753.99	2400.43	2199.25	2409.22	2105.15	1611.69	1724.21
TAF9B	438.354	1.2695	0.190067	6.67886	2.41e-11	4e-10	534.457	-0.673924	0.203381	-3.31288	0.000923415	0.0059317	509.011	636.641	809.724	482.219	658.051	638.852	218.573	249.632	260.623	175.091	297.885	323.945	717.755	647.785	775.54	672.013	409.387	478.519	429.825
RP11-39K24.7	26.4625	2.68127	0.398031	6.67816	2.42e-11	4.02e-10	38.8399	-0.0495936	0.384265	-0.109692	0.912654	0.966511	44.9729	46.3778	45.3725	55.7633	40.3403	47.4899	5.56874	9.19697	0	1.14439	11.8654	9.45825	77.2787	47.9446	58.0078	48.8269	33.8026	57.6716	74.503
FLT1	277.48	-3.01225	0.452774	-6.67598	2.46e-11	4.08e-10	218.754	-2.87117	0.774463	-3.84299	0.000121546	0.00106123	44.9729	61.8371	8.14377	105.685	52.9466	42.9671	632.052	521.6	649.512	90.4066	542.688	576.953	48.0064	69.2533	12.6104	96.369	0	3.11739	9.82457
ROBO2	71.4138	2.77476	0.42774	6.67387	2.49e-11	4.13e-10	1892.13	-0.300412	0.272406	-1.0632	0.287691	0.492348	192.157	171.457	143.098	63.1984	76.4785	64.4506	27.8437	55.1818	55.9454	1.14439	1.87349	4.13798	4088.74	3906.95	4737.73	3976.83	2700.45	3985.58	3538.48
KIAA1279	2211.15	0.615618	0.0922656	6.67228	2.52e-11	4.17e-10	1854.6	0.162573	0.115974	1.40339	0.1605	0.334103	2679.98	2762.99	2626.95	2447.74	2753.22	2795.12	1662.27	1533.27	1855.75	1609.01	1870.37	1937.17	1883.96	2046.7	1692.32	1599.72	1943.65	2121.38	2002.57
ANKRD34B	13.1575	4.89204	0.642868	6.67136	2.53e-11	4.2e-10	14.3769	2.70116	0.657161	4.08556	4.4e-05	0.000431982	36.796	42.1617	18.6143	18.0567	23.5318	16.9607	0	0	0	1.14439	0.624498	0	7.02533	3.19631	2.52208	10.2794	71.3611	26.4978	32.7486
CCKAR	9.16424	4.99064	0.72225	6.66977	2.56e-11	4.24e-10	7.05596	4.24296	1.05353	3.82983	0.000128232	0.00111475	17.3759	18.2701	12.7974	9.55942	36.1382	15.83	0	0	0	0	0	0	0	0	0	1.28492	39.4364	10.9108	5.731
RNF150	372.742	2.20292	0.330889	6.66679	2.61e-11	4.32e-10	519.876	-0.292628	0.367816	-0.792199	0.428245	0.632873	703.213	664.749	513.058	588.966	666.455	552.918	232.495	109.05	163.743	26.3209	90.5521	161.381	722.438	640.327	557.38	630.895	482.627	533.073	539.533
BCAT1	18303	1.94313	0.291407	6.66549	2.64e-11	4.36e-10	9979.09	0.567887	0.337562	1.68218	0.0925344	0.227477	33746	36658.1	44697.7	16475.7	23591.5	22172.1	7031.93	6370.87	7466.66	2580.59	8301.45	10543.6	6046.47	5657.46	4754.12	4190.12	7584.94	7679.68	7877.67
ANKFN1	231.744	2.11572	0.317079	6.66336	2.68e-11	4.42e-10	72.1175	1.88461	0.518838	3.61326	0.000302373	0.00232999	590.78	729.396	231.516	193.844	294.988	261.194	107.198	111.677	60.0389	74.3852	33.0984	92.8091	11.7089	8.52349	6.3052	2.56984	48.826	28.0565	13.9181
INF2	3827.44	-1.01333	0.152219	-6.65791	2.78e-11	4.58e-10	4160.89	-0.159662	0.1637	-0.974739	0.32969	0.538156	1964.5	1789.06	2309.34	3474.32	2543.12	3179.56	4892.14	4191.19	3976.21	7611.32	5068.42	4930.11	4102.79	4162.66	4320.32	4151.57	3887.3	3563.17	3782.46
PTPN9	1197.56	-0.836996	0.125737	-6.65666	2.8e-11	4.62e-10	1333.66	-0.00605327	0.186504	-0.0345571	0.972433	0.997474	806.446	927.556	798.09	853.443	971.529	792.629	1521.66	1535.89	1539.18	1177.58	1633.06	1813.62	1232.95	1292.37	1399.75	1185.98	1032.86	1483.88	1296.84
LRRC4C	250.662	-1.06115	0.159411	-6.65406	2.85e-11	4.7e-10	100.455	-0.0817213	0.399753	-0.234728	0.81442	0.911545	237.13	234.7	198.941	66.9159	109.255	100.633	515.109	513.716	511.695	148.77	162.994	208.082	35.1267	23.4396	49.1806	65.5309	35.6806	65.4651	22.1053
USH1C	2147.42	-2.87503	0.443066	-6.6527	2.88e-11	4.74e-10	773.442	1.70497	0.524859	3.21673	0.0012966	0.00792921	275.97	213.619	97.7253	1414.79	593.338	534.827	6017.03	4461.84	3278.94	4537.5	1921.58	2421.9	4.68356	29.8322	5.04416	7.70952	45.0702	43.6434	36.8421
AURKB	223.772	-1.43623	0.215785	-6.65228	2.89e-11	4.75e-10	582.343	-0.333174	0.205659	-1.61382	0.106567	0.251917	96.0785	91.3502	76.7841	146.578	131.946	160.561	313.242	190.509	154.191	599.659	347.221	377.148	795.034	1033.47	911.732	989.388	582.157	802.727	829.357
NCAPH	197.861	-1.33515	0.20066	-6.6517	2.9e-11	4.77e-10	482.448	-0.607016	0.200309	-3.02585	0.00247933	0.0135497	87.9016	74.4856	95.3985	134.894	121.861	148.123	309.065	131.385	185.575	387.947	345.972	351.729	775.128	710.646	876.423	724.695	306.102	621.918	581.287
DNAJC9	796.301	-0.70931	0.106694	-6.64751	2.98e-11	4.9e-10	1071.68	-0.304397	0.16121	-1.8871	0.059147	0.163999	582.603	569.182	581.698	617.645	610.987	641.114	867.332	811.961	852.826	1312.61	1044.78	1062.87	1252.85	1440.47	1305.18	1518.78	830.042	1183.05	1324.68
TUBB2A	11504.5	1.48179	0.223764	6.64686	2.99e-11	4.92e-10	11846.8	0.206334	0.154262	1.33961	0.180372	0.362019	12708.9	10515.1	12543.7	19014.2	20423.1	22677.6	2809.43	2169.17	3662.37	12475	7991.07	11064.4	9246.51	11799.7	10578.9	12026.9	13765.2	12700.2	11343.3
AC002511.2	12.5288	4.81565	0.671496	6.64477	3.04e-11	4.98e-10	9.70755	0	1.18155	0	1	1	3.06633	4.21617	1.1634	46.7349	42.0211	53.1435	0	0	0	0	0	0	0	0	0	0	0	0	0
TBC1D8B	6850.7	1.0657	0.160393	6.64423	3.05e-11	5e-10	5197.71	-0.536342	0.243685	-2.19734	0.0279964	0.0931776	10747.5	12475.6	9166.4	7338.45	8348.76	7689.97	5045.28	5096.44	5146.97	2390.63	4358.99	4403.41	7723.18	4670.87	7607.85	4976.49	3342.7	4359.66	5167.72
RP11-92A5.2	14.9015	5.10644	0.746001	6.64282	3.08e-11	5.04e-10	2.50533	0	1.20599	0	1	NA	18.398	21.0808	107.032	5.84187	11.7659	14.6992	0	0	0	0	0	0	0	0	0	0	0	0	0
COL22A1	1189.01	-4.06022	0.631951	-6.64259	3.08e-11	5.05e-10	813.583	-1.20517	0.289645	-4.13166	3.6e-05	0.000365048	26.5749	40.7563	12.7974	69.5713	39.4999	29.3985	3854.96	5453.8	3862.96	392.525	197.341	287.885	2079.5	2059.49	2441.37	2180.51	967.131	949.244	915.322
MTMR11	1694.8	-2.50865	0.380216	-6.64205	3.09e-11	5.06e-10	1255.36	-1.62564	0.275558	-5.90835	3.46e-09	8.44e-08	358.761	306.375	203.594	820.517	428.616	481.683	5655.06	4419.8	3063.35	1368.69	1527.52	1703.67	987.059	1084.61	1717.54	1766.76	461.969	360.058	503.509
PALM	1535.28	-1.58983	0.2393	-6.64229	3.09e-11	5.06e-10	1479.13	-1.01116	0.239656	-4.2221	2.42e-05	0.0002574	742.053	646.479	613.11	933.636	705.955	720.263	3415.03	3187.41	2577.58	2275.04	1227.14	1379.72	1581.87	1831.48	1863.82	2177.94	1143.66	813.638	799.065
CCNB1	855.939	-1.29887	0.195417	-6.63967	3.14e-11	5.14e-10	1247.63	0.127721	0.116239	1.09947	0.271565	0.47438	364.894	326.05	376.94	553.915	522.743	655.813	1023.26	578.095	528.07	1935.16	1685.52	1720.81	1297.35	1480.96	1247.17	1250.23	1322.06	1444.91	1551.46
MTMR8	86.6482	2.10745	0.316538	6.63751	3.19e-11	5.21e-10	39.5179	-0.343737	0.339286	-1.01751	0.308909	0.516278	201.356	224.862	239.66	62.6673	84.0423	64.4506	32.0203	15.7662	31.384	22.8877	29.3514	31.3304	38.6393	36.2248	37.8312	38.5476	24.413	21.8217	39.2983
ARRB2	177.711	-1.43693	0.216551	-6.63409	3.27e-11	5.33e-10	189.342	-1.33515	0.255016	-5.24313	1.58e-07	2.8e-06	110.388	140.539	91.9083	77.0064	68.9147	78.0191	336.909	392.842	226.511	289.53	146.757	173.204	159.241	185.386	189.156	214.582	76.9949	56.1129	84.3275
NPW	103.496	2.38272	0.359599	6.6339	3.27e-11	5.33e-10	219.606	-0.746492	0.416919	-1.76972	0.0767732	0.198748	225.887	146.16	478.156	83.9104	39.4999	71.2348	41.7656	65.6927	57.3099	19.4546	8.74297	4.13798	263.45	416.585	394.705	517.822	178.403	268.095	257.076
CSDC2	660.942	-1.86001	0.281107	-6.63209	3.31e-11	5.4e-10	362.078	1.62506	0.393215	4.10784	3.99e-05	0.000398763	186.024	126.485	240.823	582.593	329.446	284.939	1000.98	1023.49	960.623	1602.14	841.823	751.931	35.1267	27.7013	52.9637	47.542	187.792	104.432	97.427
FOXQ1	17.2046	4.13142	0.606185	6.63165	3.32e-11	5.41e-10	24.3021	1.87675	0.742619	2.52987	0.0114105	0.0463269	8.17689	12.6485	5.81698	81.255	45.3828	47.4899	0	0	2.72904	0	0	2.9557	3.51267	11.7198	7.56624	3.85476	61.9715	12.4695	13.0994
CENPA	101.412	-1.48956	0.22458	-6.62972	3.36e-11	5.48e-10	197.579	-0.7977	0.187386	-4.25251	2.11e-05	0.000228665	68.4815	49.1886	44.2091	56.2943	46.2232	49.7513	192.122	123.502	91.4229	194.546	138.638	162.564	295.064	286.602	317.782	362.347	174.647	171.456	194.035
DMP1	100.465	3.36737	0.520502	6.62935	3.37e-11	5.49e-10	47.737	-2.2134	0.4463	-4.88767	1.02e-06	1.51e-05	88.9237	54.8101	563.084	79.6618	186.574	120.986	20.8828	32.8463	46.3937	3.43316	5.62048	2.36456	77.2787	99.0855	75.6624	73.2404	28.1689	12.4695	12.2807
FBXO41	135.943	1.24046	0.187174	6.62703	3.43e-11	5.57e-10	160.095	-0.208643	0.217729	-0.945476	0.344416	0.552458	255.528	206.592	198.941	174.194	166.404	141.339	137.826	74.8896	94.1519	48.0643	62.4498	70.9369	352.438	221.611	216.899	231.286	206.572	218.217	237.427
RP1-169K13.3	7.61076	4.8469	0.724378	6.62496	3.47e-11	5.64e-10	6.75306	1.49828	0.910936	1.64933	0.0990795	0.239141	26.5749	15.4593	16.2875	12.7459	10.0851	10.1764	0	0	0	0	0	0	8.19622	0	5.04416	2.56984	26.2909	7.79347	7.36843
CHDH	926.898	1.42078	0.21429	6.62393	3.5e-11	5.68e-10	389.365	-1.20996	0.229186	-5.28086	1.29e-07	2.31e-06	2041.16	1794.68	1911.46	699.962	890.848	965.628	407.91	572.84	476.218	403.969	550.807	407.296	255.254	348.397	385.878	330.224	93.8962	190.161	138.363
LIX1L	2735.98	-0.650109	0.0981495	-6.623	3.52e-11	5.71e-10	1986.63	-0.331608	0.0920575	-3.603	0.000314562	0.00241462	2349.83	2584.51	2201.15	1993.14	1801.03	1727.73	4150.11	4153.09	3884.79	2498.2	2524.84	2963.39	2003.39	1912.46	2099.63	1989.06	1462.9	1674.04	1625.15
TMC6	710.129	1.99209	0.303162	6.62284	3.52e-11	5.71e-10	819.374	1.52787	0.196745	7.76973	7.87e-15	4.46e-13	1058.91	881.178	889.998	1382.4	1050.53	1336.5	93.2764	211.53	79.1422	481.787	507.716	548.578	611.204	685.075	380.834	416.314	1667.6	1446.47	1455.67
RGS6	38.9006	2.69087	0.40966	6.62122	3.56e-11	5.77e-10	41.2296	3.33882	0.494111	6.50675	7.68e-11	2.51e-09	113.454	71.6748	75.6208	50.9836	43.702	38.4442	12.5297	35.474	17.7388	2.28877	3.12249	1.77342	3.51267	3.19631	3.78312	1.28492	33.8026	35.8499	36.0234
RP11-383H13.1	111.153	-2.66711	0.403032	-6.61859	3.63e-11	5.87e-10	83.684	-2.82699	0.634662	-4.42033	9.86e-06	0.000116623	32.7076	68.864	19.7777	26.0229	21.851	2.26142	366.145	164.232	192.398	124.738	106.165	208.673	32.7849	20.2433	31.526	60.3912	0	7.79347	3.27486
PYCARD	86.9207	1.81674	0.274237	6.61803	3.64e-11	5.89e-10	124.891	-1.26359	0.354836	-3.55162	0.000382874	0.00284299	195.223	137.728	137.281	169.414	72.2764	107.418	32.0203	49.9264	46.3937	20.599	27.4779	47.2912	190.855	213.087	205.55	265.978	58.2156	112.226	96.6082
TRIOBP	2383.24	-0.611575	0.0924366	-6.61611	3.69e-11	5.96e-10	2560.42	-0.204441	0.127935	-1.59814	0.110013	0.257822	1857.18	1682.25	2087.13	1886.92	1887.59	1897.33	3176.97	2903.61	2907.79	2460.43	2853.95	2997.67	2835.89	2707.27	3007.58	3000.29	2300.46	2733.95	2479.07
DLX2	72.293	2.54784	0.384241	6.61507	3.71e-11	6e-10	109.509	0.894659	0.374768	2.39164	0.0167731	0.062664	89.9458	68.864	112.849	257.042	100.01	124.378	6.96093	14.4524	40.9356	19.4546	13.1144	19.5076	87.8167	82.0386	73.1403	84.8047	210.327	134.048	122.807
KLHL1	9.97835	4.81144	0.689761	6.61272	3.77e-11	6.09e-10	5.87655	2.87435	0.949661	2.86194	0.00421062	0.0209353	23.5086	35.1347	15.1242	15.9324	11.7659	16.9607	0	1.31385	0	0	0	0	1.17089	2.13087	0	0	18.7792	4.67608	8.18714
TLR5	345.075	-1.7651	0.266693	-6.6106	3.83e-11	6.18e-10	214.998	0.224491	0.324183	0.677316	0.498205	0.694056	159.449	243.132	132.627	123.21	121.861	100.633	884.038	702.911	674.073	149.915	368.454	480.597	84.304	89.4966	81.9676	79.665	101.408	99.7563	93.3334
MAP3K6	2055.4	-2.03912	0.308875	-6.60338	4.02e-11	6.48e-10	896.119	-0.485235	0.364169	-1.34135	0.179808	0.361123	824.844	521.399	628.234	876.28	688.306	905.7	4673.57	5047.82	3745.61	3957.29	1487.55	1308.19	693.166	608.364	606.56	751.678	745.536	325.767	342.222
PRRG1	994.726	1.24835	0.18902	6.60328	4.02e-11	6.48e-10	570.093	0.16067	0.217469	0.729342	0.465793	0.666766	1440.15	1385.71	2018.49	1151.91	1259.79	1198.55	677.995	504.52	634.502	359.338	562.672	743.064	268.134	238.658	252.208	247.989	274.177	300.828	269.357
P2RX1	67.6441	-2.68554	0.4037	-6.60288	4.03e-11	6.49e-10	17.2081	1.25752	0.70812	1.7523	0.0797226	0.204053	19.4201	15.4593	13.9608	12.2148	8.40423	12.4378	146.18	341.602	102.339	78.9627	30.6004	30.1482	4.68356	5.32718	1.26104	3.85476	24.413	4.67608	3.27486
DDX12P	289.98	-0.939109	0.142204	-6.60278	4.04e-11	6.49e-10	413.92	-1.26619	0.241855	-5.23702	1.63e-07	2.88e-06	140.029	154.593	132.627	298.997	232.797	219.358	290.967	282.478	206.043	547.017	510.214	464.637	555.001	475.184	620.432	565.365	125.821	227.569	321.755
AC067940.1	15.1587	3.60581	0.519269	6.59747	4.18e-11	6.73e-10	4.00295	0.487059	1.15599	0.410293	0.681591	0.831675	36.796	57.6209	22.1045	16.9945	20.1701	16.9607	0	2.62771	6.82261	0	0.624498	1.18228	0	4.26174	0	0	0	0	4.91228
MARCHF9	379.407	-1.23575	0.187447	-6.59163	4.35e-11	6.99e-10	291.188	-1.3411	0.259594	-5.17178	2.32e-07	3.91e-06	207.489	237.511	211.738	231.55	246.244	201.267	661.288	625.394	534.892	666.033	365.331	364.143	290.38	297.257	319.043	349.498	159.624	105.991	104.795
PON3	24.1836	2.5101	0.376597	6.59129	4.36e-11	7e-10	26.5361	0.826277	0.40362	2.05821	0.0395697	0.121481	64.393	57.6209	70.9672	22.3053	17.6489	21.4835	15.314	2.62771	4.09356	3.43316	4.99598	5.32026	36.2976	30.8976	16.3935	29.5531	80.7507	32.7326	42.5731
OAS2	86.7874	1.94284	0.295071	6.58997	4.4e-11	7.06e-10	44.176	-3.82801	0.844494	-4.57421	4.78e-06	6.08e-05	155.361	165.836	118.666	101.967	105.893	175.26	32.0203	38.1017	80.5067	16.0214	29.3514	22.4633	8.19622	6.39261	17.6546	28.2682	0	0	0
ABCB11	11.6441	4.75252	0.655832	6.58821	4.45e-11	7.14e-10	5.29794	0.24855	0.849463	0.304727	0.760574	0.882134	27.597	26.7024	11.634	18.0567	28.5744	24.8757	0	0	0	2.28877	0	0	1.17089	1.06544	3.78312	3.85476	1.87792	4.67608	2.45614
DAB2IP	1065.89	-1.49434	0.226894	-6.58799	4.46e-11	7.15e-10	1389.76	-1.35047	0.24074	-5.61166	2e-08	4.18e-07	447.685	347.131	625.907	854.506	511.817	515.605	1802.88	2083.77	1479.14	1102.05	1561.87	1458.34	1825.42	1898.61	2194.21	1989.06	587.79	773.112	936.609
SLC2A4	720.611	2.42201	0.373105	6.58698	4.49e-11	7.19e-10	228.113	0.426459	0.360588	1.16782	0.242881	0.441868	1940.99	1714.57	452.561	889.557	964.805	1119.4	498.402	429.63	379.337	120.161	58.7028	79.2128	23.4178	34.0939	23.9598	25.6984	61.9715	29.6152	22.1053
UPK1B	282.267	2.68542	0.419258	6.58616	4.51e-11	7.23e-10	138.896	-0.291114	0.610092	-0.497026	0.619171	0.788484	291.302	313.402	463.032	345.732	726.125	681.819	22.275	7.88312	25.9259	268.931	136.14	104.632	42.152	12.7852	44.1364	28.2682	20.6572	15.5869	38.4796
CADM4	258.556	-2.22857	0.341083	-6.5837	4.59e-11	7.34e-10	714.758	-1.76919	0.267664	-6.59701	4.2e-11	1.44e-09	39.8623	53.4048	45.3725	217.742	108.415	104.025	350.831	643.788	383.43	468.054	347.845	339.906	1730.57	2001.95	1644.4	1616.43	441.312	568.923	507.603
ADCYAP1	13.5446	4.99037	0.727585	6.58318	4.6e-11	7.36e-10	10.1373	1.88026	1.0118	1.86468	0.0622263	0.169993	59.2825	64.6479	16.2875	3.18647	10.0851	9.0457	0	0	0	0	0	0	0	0	0	2.56984	9.38962	0	3.27486
CCT8P1	248.227	3.83668	0.622919	6.58241	4.63e-11	7.4e-10	57.5261	-0.513923	0.325246	-1.58881	0.112103	0.260781	664.372	611.344	1059.85	154.544	223.552	167.345	4.17656	1.31385	9.55165	26.3209	25.6044	30.7393	28.1013	29.8322	32.787	26.9833	24.413	15.5869	21.2866
TOR4A	789.464	-1.65388	0.250848	-6.58182	4.65e-11	7.42e-10	702.27	-1.72183	0.203622	-8.45434	2.81e-17	2.08e-15	266.771	215.024	445.581	463.101	329.446	333.56	595.856	695.028	690.448	2117.12	1693.64	1628	570.223	550.83	653.219	629.611	223.473	132.489	186.667
PPEF1	185.078	-1.66279	0.252853	-6.57925	4.73e-11	7.55e-10	92.7587	2.32053	0.584216	3.94584	7.95e-05	0.000730148	61.3267	88.5395	58.1698	164.103	77.3189	75.7577	325.771	335.032	256.53	284.952	240.432	253.008	3.51267	12.7852	6.3052	10.2794	107.042	20.263	14.7369
TMEM39B	450.482	-0.932091	0.141712	-6.57813	4.76e-11	7.6e-10	503.739	-0.633071	0.215899	-2.93415	0.00334459	0.0172681	258.594	240.321	275.725	359.54	358.86	369.743	561.051	509.775	593.567	798.782	560.799	519.021	601.837	475.184	622.954	690.002	381.219	372.528	396.257
UBE2QL1	206.362	2.3712	0.362563	6.57296	4.93e-11	7.86e-10	378.68	4.15059	0.333237	12.457	1.28e-35	5.54e-33	245.307	213.619	153.568	438.671	552.158	508.82	104.414	73.5758	69.5906	49.2087	33.7229	33.695	117.089	104.413	34.0481	39.8325	1414.08	1388.8	1386.9
LHX9	40.5969	-4.43048	0.648114	-6.57148	4.98e-11	7.93e-10	164.267	-3.1148	0.356666	-8.68216	3.88e-18	3.19e-16	0	0	0	1.06216	2.52127	2.26142	284.006	57.8095	85.9648	10.2995	23.7309	19.5076	303.26	281.275	372.007	340.504	37.5585	46.7608	25.3801
RPGRIP1L	733.172	0.686838	0.104581	6.5673	5.12e-11	8.15e-10	623.143	0.546048	0.15503	3.52286	0.000426916	0.00310313	1007.8	1028.74	931.88	887.433	776.551	810.72	570.796	492.695	570.37	559.605	573.289	588.185	634.622	507.147	464.063	461.286	799.996	707.647	761.404
IL17RD	390.517	-1.2645	0.192546	-6.56538	5.19e-11	8.25e-10	721.561	-1.5261	0.213721	-7.15331	8.47e-13	3.68e-11	168.648	334.482	222.209	175.787	242.882	204.659	828.351	559.701	633.138	462.332	417.164	436.853	378.197	303.649	533.42	484.415	146.478	112.226	174.386
CYB5R2	296.686	-1.12753	0.171723	-6.56374	5.25e-11	8.34e-10	263.351	-4.26928	0.320915	-13.1434	1.86e-39	9.99e-37	162.516	179.89	169.856	232.613	164.723	184.306	325.772	304.814	308.382	642.001	395.307	490.055	266.963	318.565	422.448	442.012	24.413	14.0282	15.5556
FOXM1	992.513	-1.09474	0.166821	-6.5626	5.29e-11	8.4e-10	1695.73	-0.454676	0.199035	-2.28259	0.0224547	0.0783282	741.031	809.504	508.404	617.113	518.541	586.839	1457.62	1237.65	993.371	1468.25	1441.96	1529.87	2114.63	2068.01	2451.46	2645.65	1030.98	1984.22	2044.33
THEMIS2	173.255	-2.72018	0.41184	-6.56204	5.31e-11	8.43e-10	111.101	-1.12341	0.412028	-2.7487	0.00598327	0.0278578	15.3317	36.5401	4.65358	69.0402	37.819	50.882	182.376	35.474	77.7777	631.702	374.699	562.766	24.5887	40.4866	20.1766	42.4023	3.75585	20.263	16.3743
[truncated: 36,592 more rows]

## Sheet: supplementary file 1c
HESC-derived articular cartilage									Fetal epiphyseal cartilage
ID	Description	GeneRatio	BgRatio	pvalue	p.adjust	qvalue			"ID"	"Description"	"GeneRatio"	"BgRatio"	"pvalue"	"p.adjust"	"qvalue"
[truncated: 62 more rows]

## Sheet: supplementary file 1d
Top 200 differentially-expressed genes in in-vitro comparison					Primary/In-vitro overlaps:						Top 200 differentially-expressed genes in primary comparison					Primary/In-vitro overlaps:
[truncated: 401 more rows]

[truncated: 3 more sheets: supplementary file 1e, supplementary file 1f, supplementary file 1g]
