# Supplementary material for: Lineage-specific differences and regulatory networks governing human chondrocyte development
Source: eLife. 2023 Mar 15;12:e79925. doi: 10.7554/eLife.79925 (PMC10069868; doi:10.7554/eLife.79925)
Supplement: Supplementary file 2. — (a) DEG data for hESC-derived (in vitro) chondrocyte samples after 4 weeks of in vitro differentiation. Columns C-H: DESeq2 statistics. Log2FC is calculated as BMP-vs-TGF. Columns I-N: Normalized transcript counts for the indicated gene in the indicated sample. (b) DEG data for hESC-derived (in vitro) chondrocyte samples after 8 weeks of in vitro differentiation. Columns C-H: DESeq2 statistics. Log2FC is calculated as BMP-vs-TGF. Columns I-N: Normalized transcript counts for the indicated gene in the indicated sample. (c) DEG data for hESC-derived (in vitro) chondrocyte samples after 12 weeks of in vitro differentiation. Columns C-H: DESeq2 statistics. Log2FC is calculated as BMP-vs-TGF. Columns I-N: Normalized transcript counts for the indicated gene in the indicated sample. (d) DEG gene-set enrichments in each lineage and time. The (up to) top 30 significantly-enriched gene sets were obtained using sets of genes up-regulated in the indicated tissue and time (e) Differential expression information for differentially expressed at 4 weeks. (f) Differential expression information for differentially expressed at 8 weeks. (g) Differential expression information for differentially expressed at 12 weeks. (h) Allocation of in the TGF lineage which were differentially expressed in one or more timepoints during in vitro differentiation. (i) Allocation of in the BMP lineage which were differentially expressed in one or more timepoint during in vitro differentiation. [file elife-79925-supp2.xlsx]

## Sheet: supplemental file 2a
gene	symbol	baseMean	log2FoldChange	lfcSE	stat	pvalue	padj	RR2-4wT	RR4-4wT	RR22-4wT	RR2-4wB	RR4-4wB	RR22-4wB
ENSG00000188686	SCXA	1314.51	-5.21243	0.467758	-11.1958	4.27582e-29	2.54639e-25	1580.21	2609.92	3565.49	51.6163	18.6909	61.1044
ENSG00000197859	ADAMTSL2	4342.93	-5.13743	0.416693	-12.3052	8.49189e-35	7.58581e-31	11321.5	4055.32	10195.7	149.831	122.34	212.939
ENSG00000116690	PRG4	26509.2	-5.04596	0.408671	-12.3551	4.57407e-35	7.58581e-31	23195.8	61283.6	71228.3	693.236	859.78	1794.25
ENSG00000169436	COL22A1	4264.72	-5.00264	0.498246	-10.1263	4.2223e-24	1.50871e-20	15169.5	2341.53	7710.53	127.607	152.076	87.0274
ENSG00000165621	OXGR1	135.979	-4.74865	0.642617	-6.32721	2.49631e-10	5.57488e-08	56.6355	10.235	747.435	0.716894	0.849585	0
ENSG00000102678	FGF9	196.365	-4.6414	0.543979	-8.30883	9.66499e-17	6.39536e-14	591.083	253.6	309.218	16.4886	5.9471	1.85165
ENSG00000215616	AC002321.2	390.326	-4.64021	0.492794	-9.35432	8.41394e-21	1.2527e-17	895.798	884.757	504.614	24.3744	10.195	22.2198
ENSG00000000005	TNMD	12809.1	-4.46796	0.459554	-9.52661	1.62505e-21	2.90331e-18	10598.8	3637.96	61133.2	430.136	239.583	814.725
ENSG00000163347	CLDN1	438.695	-4.41906	0.498611	-8.66312	4.59025e-18	4.31628e-15	398.841	162.622	2015.61	22.2237	5.09751	27.7747
ENSG00000095596	CYP26A1	221.499	-4.32562	0.588338	-7.13122	9.9482e-13	3.86379e-10	989.924	102.35	217.212	4.30136	5.9471	9.25824
ENSG00000078098	FAP	2196.08	-4.31936	0.451783	-9.65709	4.5869e-22	1.02437e-18	3224.23	4129.24	5361.05	244.461	93.4544	124.06
ENSG00000154646	TMPRSS15	115.667	-4.27522	0.6729	-6.07867	1.21182e-09	2.30323e-07	469.037	218.346	1.89704	2.86757	0	1.85165
ENSG00000143768	LEFTY2	1573.99	-4.19625	0.443028	-9.60106	7.91247e-22	1.57071e-18	3356.65	1702.42	3981.89	238.009	39.0809	125.912
ENSG00000139330	KERA	342.477	-4.17676	0.579071	-7.28676	3.17489e-13	1.37743e-10	1344.1	150.113	521.687	9.31962	20.3901	9.25824
ENSG00000106819	ASPN	14821.7	-4.11044	0.488579	-8.50338	1.84144e-17	1.4304e-14	24102.8	9080.7	52781.4	1896.18	498.707	570.307
ENSG00000100626	GALNT16	228.899	-4.00953	0.51349	-7.83521	4.68052e-15	2.534e-12	429.153	360.499	527.378	20.7899	5.9471	29.6264
ENSG00000196990	FAM163B	74.3565	-3.98164	0.629976	-6.01791	1.76682e-09	3.15661e-07	243.293	139.878	53.1172	6.45204	3.39834	0
ENSG00000162745	OLFML2B	1063.45	-3.96045	0.471652	-8.52171	1.57214e-17	1.27672e-14	1960.7	740.33	3392.86	189.26	27.1867	70.3626
ENSG00000082497	SERTAD4	1997.2	-3.94428	0.505484	-7.90392	2.70264e-15	1.55759e-12	3288.85	1779.75	6488.84	181.374	175.864	68.5109
ENSG00000160161	CILP2	27864.9	-3.88955	0.401873	-9.69314	3.22465e-22	8.23024e-19	43232	46660.1	68887.4	3352.91	2120.57	2936.71
ENSG00000105088	OLFM2	739.21	-3.86893	0.459698	-8.49159	2.0382e-17	1.45658e-14	1362.44	1576.19	1275.76	109.685	81.5602	29.6264
ENSG00000119681	LTBP2	17599	-3.86824	0.434397	-8.87774	6.82317e-19	7.17075e-16	26404.9	15097.7	59567.2	1820.19	1197.07	1507.24
ENSG00000197467	COL13A1	1265.36	-3.84541	0.527704	-7.64858	2.03208e-14	1.0678e-11	3142.07	1320.31	2762.1	270.986	78.1619	18.5165
ENSG00000176734	TRIL	121.074	-3.78244	0.603171	-6.15247	7.62853e-10	1.49771e-07	479.407	130.78	96.7492	4.30136	5.9471	9.25824
ENSG00000049540	ELN	38827.2	-3.77868	0.423235	-8.95291	3.46246e-19	4.07298e-16	98442.8	26285.7	95714.4	7739.58	1909.02	2871.9
ENSG00000108821	COL1A1	453036	-3.7306	0.441073	-8.52438	1.53624e-17	1.27672e-14	854479	383884	1.33304e+06	87634.5	23918.4	35266.5
ENSG00000179954	SSC5D	5852.75	-3.65199	0.435345	-8.54007	1.34145e-17	1.19832e-14	13972.2	5704.29	13082	1615.88	262.522	479.577
ENSG00000101074	R3HDML	62.4706	-3.5261	0.670895	-5.06804	4.01931e-07	4.05701e-05	224.947	136.466	5.69113	5.01826	0.849585	1.85165
ENSG00000113578	FGF1	860.897	-3.41186	0.552387	-6.31068	2.77821e-10	6.0531e-08	429.951	2742.97	1759.51	105.383	33.1338	94.434
ENSG00000100276	RASL10A	243.041	-3.41162	0.521711	-6.3636	1.97073e-10	4.45684e-08	64.6123	531.081	790.119	7.88583	44.1784	20.3681
ENSG00000197959	DNM3	592.77	-3.37455	0.4274	-7.89311	2.94739e-15	1.64556e-12	1090.43	624.333	1584.98	73.1231	46.7272	137.022
ENSG00000203706	SERTAD4-AS1	180.085	-3.35118	0.561034	-6.11016	9.95342e-10	1.93291e-07	193.837	415.085	412.607	35.1278	12.7438	11.1099
ENSG00000161381	PLXDC1	245.827	-3.35116	0.501473	-6.77256	1.26521e-11	4.03646e-09	731.475	352.538	283.608	75.9907	22.0892	9.25824
ENSG00000133067	LGR6	528.95	-3.34061	0.50385	-6.53704	6.27489e-11	1.7402e-08	1324.15	229.718	1451.24	77.4245	46.7272	44.4395
ENSG00000150551	LYPD1	415.865	-3.3263	0.508988	-6.49765	8.15833e-11	2.08224e-08	1913.64	145.564	308.27	64.5204	7.64627	55.5494
ENSG00000261295	RP11-524D16__A.3	357.672	-3.30339	0.561534	-6.0328	1.61143e-09	2.92442e-07	332.634	461.711	1240.67	29.3926	70.5156	11.1099
ENSG00000101938	CHRDL1	467.452	-3.28674	0.476141	-6.816	9.36124e-12	3.21631e-09	1757.3	319.559	563.422	75.2738	48.4264	40.7362
ENSG00000168542	COL3A1	296313	-3.28653	0.469068	-7.07829	1.45945e-12	5.43219e-10	535594	204906	913644	78976.6	20765.6	23991.8
ENSG00000189056	RELN	418.455	-3.267	0.487786	-6.83204	8.37158e-12	2.93268e-09	1025.02	830.17	460.033	42.2967	129.137	24.0714
ENSG00000138615	CILP	1237.51	-3.23842	0.48457	-6.79036	1.11851e-11	3.77042e-09	3549.69	525.395	2756.4	467.415	59.471	66.6593
ENSG00000188487	INSC	182.087	-3.23501	0.518143	-6.24135	4.338e-10	8.90835e-08	167.513	584.531	265.586	17.2054	48.4264	9.25824
ENSG00000105664	COMP	19359.6	-3.22568	0.444361	-7.28411	3.2381e-13	1.37743e-10	18978.5	47500.5	41200	3359.36	2088.28	3031.15
ENSG00000236428	PPP1R18	33.9927	-3.22013	0.710203	-4.53352	5.80084e-06	0.000409636	36.6934	147.839	15.1764	0	4.24793	0
ENSG00000102359	SRPX2	2981.82	-3.19034	0.431505	-7.39902	1.37188e-13	6.28462e-11	3423.65	5075.41	8020.7	415.081	591.311	364.774
ENSG00000176532	PRR15	79.1848	-3.18911	0.605904	-5.11156	3.19502e-07	3.37765e-05	199.421	37.5282	214.366	5.73515	5.09751	12.9615
ENSG00000163421	PROK2	175.98	-3.18604	0.553381	-5.76471	8.17968e-09	1.23846e-06	563.164	127.369	300.681	12.1872	13.5934	38.8846
ENSG00000164742	ADCY1	22.8471	-3.1855	0.735339	-4.58641	4.50934e-06	0.000328736	49.4563	19.3327	68.2936	0	0	0
ENSG00000049323	LTBP1	15487.4	-3.1543	0.440124	-7.2284	4.88731e-13	2.03062e-10	27734.6	20979.4	36549.4	3705.62	2502.03	1453.54
ENSG00000240583	AQP1	3064.85	-3.13925	0.412912	-7.5598	4.03688e-14	1.94927e-11	4118.44	2675.88	10187.1	476.734	314.347	616.599
ENSG00000151892	GFRA1	434.043	-3.1346	0.499284	-6.32385	2.55127e-10	5.62728e-08	313.489	342.303	1772.79	65.9542	15.2925	94.434
ENSG00000261321	FAM101B	2718.82	-3.13353	0.412893	-7.61067	2.72682e-14	1.35538e-11	4356.94	4495.43	6057.26	616.528	342.383	444.395
ENSG00000187955	COL14A1	9745.64	-3.13306	0.480257	-6.43647	1.22287e-10	2.95241e-08	13730.5	4598.91	36560.8	1772.16	798.61	1012.85
ENSG00000172164	SNTB1	446.933	-3.10923	0.480019	-6.44201	1.17904e-10	2.88559e-08	762.585	285.442	1440.8	103.233	33.9834	55.5494
ENSG00000181195	PENK	156213	-3.08728	0.465978	-6.77778	1.22034e-11	3.9641e-09	219555	234308	400843	50048.5	16218.6	16303.8
ENSG00000229108	AC005550.4	29.4334	-3.07416	0.720675	-4.11255	3.91314e-05	0.00200897	84.5544	6.82332	82.5214	0	0.849585	1.85165
ENSG00000128422	KRT17	276.248	-3.06049	0.610704	-6.03189	1.6205e-09	2.92442e-07	438.726	882.482	206.778	119.004	6.79668	3.70329
ENSG00000140092	FBLN5	15320.2	-3.05321	0.427781	-7.18513	6.71437e-13	2.72634e-10	32016.6	15350.2	36155.8	4830.43	1740.8	1827.58
ENSG00000196611	MMP1	307.09	-3.04984	0.516305	-6.24156	4.33215e-10	8.90835e-08	386.078	1083.77	172.631	18.6392	175.864	5.55494
ENSG00000165623	UCMA	1704.49	-3.01773	0.472488	-6.46146	1.03699e-10	2.57318e-08	954.826	6103.46	2283.09	190.694	613.401	81.4725
ENSG00000143196	DPT	559.304	-3.0107	0.484403	-6.43226	1.25719e-10	2.99479e-08	1083.25	674.371	1264.38	212.201	27.1867	94.434
ENSG00000272636	DOC2B	43.6676	-3.0077	0.677725	-4.41263	1.02121e-05	0.000665875	118.855	31.8421	101.492	2.86757	5.09751	1.85165
ENSG00000198759	EGFL6	2320.88	-2.98535	0.466427	-6.5357	6.3312e-11	1.7402e-08	4753.39	3259.27	4597.49	419.383	706.855	188.868
ENSG00000232258	TMEM114	25.9552	-2.98121	0.718476	-4.13615	3.5318e-05	0.00189487	53.4447	23.8816	73.9847	0.716894	0	3.70329
ENSG00000182492	BGN	65401.2	-2.9808	0.39133	-7.61047	2.73108e-14	1.35538e-11	93178.1	96502.2	165639	12154.9	10356.4	14576.2
ENSG00000197614	MFAP5	3465	-2.97997	0.546892	-5.12861	2.91894e-07	3.16059e-05	536.841	2945.4	16396.1	276.004	252.327	383.291
ENSG00000186897	C1QL4	189.432	-2.96989	0.544739	-5.59817	2.16628e-08	2.9279e-06	244.091	620.922	178.322	39.4291	50.1255	3.70329
ENSG00000134198	TSPAN2	1290.67	-2.96629	0.464422	-6.52815	6.65868e-11	1.80249e-08	2859.69	1928.72	2192.03	400.027	282.062	81.4725
ENSG00000204618	RNF39	20.5805	-2.96277	0.738267	-4.26588	1.99118e-05	0.00117045	11.9652	31.8421	79.6758	0	0	0
ENSG00000102362	SYTL4	1577.27	-2.95267	0.450093	-6.53632	6.30518e-11	1.7402e-08	1153.45	3236.53	4266.45	206.465	393.358	207.384
ENSG00000251405	CTB-109A12.1	41.8384	-2.94995	0.678101	-4.03006	5.57623e-05	0.00266377	199.421	25.0188	18.0219	5.01826	1.69917	1.85165
ENSG00000220785	MTMR9LP	328.924	-2.94203	0.460601	-6.42502	1.31848e-10	3.09947e-08	844.746	511.749	423.989	114.703	45.028	33.3296
ENSG00000178860	MSC	77.2034	-2.92407	0.62127	-4.80935	1.51422e-06	0.000130063	255.258	37.5282	135.639	29.3926	1.69917	3.70329
ENSG00000169181	GSG1L	73.8857	-2.92266	0.61574	-4.74129	2.12359e-06	0.000174037	224.149	111.447	79.6758	5.73515	9.34544	12.9615
ENSG00000089250	NOS1	166.517	-2.91112	0.649573	-4.26583	1.99158e-05	0.00117045	867.081	79.6054	22.7645	7.88583	5.09751	16.6648
ENSG00000130812	ANGPTL6	423.47	-2.9062	0.459158	-6.39905	1.56343e-10	3.62757e-08	599.06	810.837	872.64	35.1278	102.8	120.357
ENSG00000171812	COL8A2	5594.77	-2.89909	0.39887	-7.29044	3.08941e-13	1.37743e-10	14437.3	7272.52	8360.27	1844.57	954.084	699.923
ENSG00000017427	IGF1	901.38	-2.8861	0.449108	-6.65886	2.7596e-11	8.35646e-09	1241.99	491.279	3010.61	123.306	26.3371	514.758
ENSG00000142661	MYOM3	200.262	-2.88005	0.545174	-5.30342	1.13654e-07	1.36277e-05	122.843	349.126	636.458	32.2602	12.7438	48.1428
ENSG00000105650	PDE4C	116.881	-2.86631	0.537873	-5.32697	9.9867e-08	1.21376e-05	259.247	243.365	137.536	27.242	24.638	9.25824
ENSG00000204291	COL15A1	7518.25	-2.86502	0.496605	-5.66206	1.49567e-08	2.15497e-06	3026.41	12186.4	26655.4	882.496	1508.86	849.906
ENSG00000073756	PTGS2	1908.31	-2.86434	0.499944	-6.01233	1.82875e-09	3.2349e-07	2227.93	5341.52	2706.13	516.88	587.064	70.3626
ENSG00000186340	THBS2	12835	-2.82683	0.435594	-6.54242	6.05332e-11	1.7402e-08	28577	14382.4	25977.2	4088.44	2568.3	1416.51
ENSG00000114646	CSPG5	220.788	-2.77781	0.620455	-4.93665	7.94776e-07	7.63412e-05	200.218	130.78	905.838	73.84	8.49585	5.55494
ENSG00000156427	FGF18	471.973	-2.77214	0.552414	-5.5971	2.17962e-08	2.9279e-06	1364.84	533.356	616.539	63.8035	14.443	238.862
ENSG00000260463	MAPK15	46.4815	-2.77147	0.666967	-4.19592	2.71764e-05	0.00152683	150.762	70.5076	40.7864	10.0365	6.79668	0
ENSG00000160963	COL26A1	416.942	-2.74948	0.466974	-5.77445	7.7206e-09	1.17894e-06	1923.21	241.09	125.205	154.849	42.4793	14.8132
ENSG00000214357	NEURL1B	332.75	-2.73767	0.538409	-5.2459	1.55521e-07	1.81603e-05	830.388	285.442	684.833	119.004	62.0197	14.8132
ENSG00000164125	FAM198B	1748.02	-2.72955	0.49339	-5.71921	1.07021e-08	1.5802e-06	4112.05	1473.84	3696.39	847.368	245.53	112.95
ENSG00000166033	HTRA1	28147.4	-2.72942	0.412427	-6.61714	3.66217e-11	1.09047e-08	44302.5	26220.9	80057.1	8422.07	3499.44	6382.63
ENSG00000101096	NFATC2	4018.8	-2.7271	0.468334	-5.65741	1.53672e-08	2.1964e-06	1227.63	7220.21	13635	349.127	995.714	685.109
ENSG00000172346	CSDC2	545.072	-2.71354	0.453521	-6.06847	1.29136e-09	2.42858e-07	1133.51	955.264	792.016	230.84	97.7023	61.1044
ENSG00000130720	FIBCD1	522.142	-2.71146	0.628784	-4.01285	5.99911e-05	0.00285053	2342	605.001	18.0219	108.251	16.9917	42.5879
ENSG00000170468	AC005280.1	21.2079	-2.70642	0.73421	-3.87159	0.000108126	0.00464371	33.5027	37.5282	54.0657	2.15068	0	0
ENSG00000075223	SEMA3C	2632.14	-2.70405	0.532963	-5.22537	1.73803e-07	2.00333e-05	5386.75	1768.38	7189.8	686.067	610.002	151.835
ENSG00000153904	DDAH1	1987.91	-2.70393	0.472476	-5.81538	6.0497e-09	9.3986e-07	5111.55	1885.51	3643.27	587.853	523.345	175.906
ENSG00000237724	HSPA1A	22.9771	-2.69417	0.740305	-3.51816	0.000434551	0.013839	0	59.1354	78.7273	0	0	0
ENSG00000167772	ANGPTL4	633.182	-2.68643	0.560923	-4.82592	1.39358e-06	0.000122649	187.455	1989	1313.7	97.4975	181.811	29.6264
ENSG00000164692	COL1A2	374406	-2.68548	0.426816	-6.25399	4.00107e-10	8.61242e-08	594347	311259	1.10941e+06	85757.7	67503	78152.5
ENSG00000164694	FNDC1	4463.03	-2.67682	0.493376	-5.42648	5.74764e-08	7.33481e-06	7898.66	2736.15	13607.5	1357.8	717.05	461.06
ENSG00000175600	SUGCT	316.313	-2.67256	0.513922	-4.9957	5.86217e-07	5.81853e-05	112.473	311.598	1332.67	33.694	40.7801	66.6593
ENSG00000123700	KCNJ2	362.427	-2.66185	0.535126	-4.78631	1.69877e-06	0.00014384	956.422	94.3892	950.419	81.009	44.1784	48.1428
ENSG00000182379	NXPH4	1011.55	-2.64334	0.474038	-5.62977	1.80446e-08	2.53846e-06	2595.66	1244.12	1564.11	126.173	294.806	244.417
ENSG00000086570	FAT2	213.07	-2.63118	0.600685	-4.69277	2.69527e-06	0.000213069	813.636	178.543	179.271	12.9041	14.443	79.6208
ENSG00000172548	NIPAL4	60.9269	-2.59857	0.616385	-4.17001	3.04586e-05	0.00167329	176.288	121.682	36.9924	10.7534	16.1421	3.70329
ENSG00000235336	SLC44A4	61.0399	-2.5769	0.699504	-4.04576	5.21527e-05	0.0025251	199.421	109.173	38.8894	0	7.64627	11.1099
ENSG00000236841	AC007750.5	38.5767	-2.57058	0.689832	-3.85621	0.000115159	0.00486389	74.9822	102.35	39.8379	7.88583	0.849585	5.55494
ENSG00000197584	KCNMB2	79.3708	-2.56285	0.593347	-4.32984	1.4922e-05	0.00092248	184.265	85.2914	162.197	20.073	16.9917	7.40659
ENSG00000149380	P4HA3	615.26	-2.5583	0.461955	-5.59116	2.25558e-08	3.00733e-06	874.26	728.958	1640.94	71.6894	197.953	177.758
ENSG00000128512	DOCK4	578.171	-2.55175	0.504686	-5.11261	3.17744e-07	3.37765e-05	1124.73	499.239	1465.47	174.205	146.129	59.2527
ENSG00000102996	MMP15	500.522	-2.54286	0.441658	-5.7946	6.84841e-09	1.05477e-06	1039.38	367.322	1210.31	208.616	44.1784	133.319
ENSG00000179431	FJX1	271.848	-2.54095	0.478829	-5.3822	7.35829e-08	9.32364e-06	595.071	383.243	441.063	129.041	38.2313	44.4395
ENSG00000168452	PPT2	20.3864	-2.53868	0.74028	-3.35482	0.000794171	0.0223258	30.3119	0	92.0066	0	0	0
ENSG00000248610	HSPA8P4	39.5728	-2.53709	0.676022	-3.82998	0.000128153	0.00519689	53.4447	61.4098	106.234	4.30136	10.195	1.85165
ENSG00000139915	MDGA2	113.551	-2.52588	0.5526	-4.63063	3.64549e-06	0.000279934	185.86	200.151	216.263	15.0548	19.5405	44.4395
ENSG00000132386	SERPINF1	3454.78	-2.52256	0.436832	-5.86375	4.52518e-09	7.41714e-07	8094.89	3394.6	6361.74	1866.79	560.726	449.95
ENSG00000058085	LAMC2	1048.84	-2.5129	0.563285	-4.51304	6.39065e-06	0.00044254	370.923	1307.8	4098.56	278.155	117.243	120.357
ENSG00000124225	PMEPA1	7444.77	-2.4966	0.40521	-6.18467	6.22308e-10	1.26343e-07	13298.2	12916.5	12441.8	1387.91	2056	2568.23
ENSG00000122585	NPY	869.936	-2.49447	0.455307	-5.75778	8.52273e-09	1.27956e-06	263.235	815.386	3349.23	15.7717	142.73	633.263
ENSG00000239754	CFB	292.371	-2.48198	0.487945	-5.15264	2.5685e-07	2.81575e-05	585.499	432.143	513.15	97.4975	92.6048	33.3296
ENSG00000255690	AC005013.1	82.3274	-2.48122	0.663021	-4.29217	1.76939e-05	0.00106437	151.56	71.6448	224.8	40.8629	5.09751	0
ENSG00000255201	RP11-350N15.4	73.9372	-2.47798	0.62745	-4.18278	2.87963e-05	0.00160773	111.676	114.859	172.631	9.31962	31.4347	3.70329
ENSG00000180772	AGTR2	357.437	-2.47627	0.536833	-4.96798	6.76542e-07	6.56907e-05	711.533	720.997	403.122	22.9406	237.884	48.1428
ENSG00000077264	PAK3	171.072	-2.47134	0.560686	-4.60116	4.20146e-06	0.000315392	240.9	183.092	484.695	15.0548	73.0643	29.6264
ENSG00000164929	BAALC	251.92	-2.46828	0.59758	-3.83981	0.000123128	0.00508934	72.5891	1189.53	156.506	21.5068	19.5405	51.8461
ENSG00000184144	CNTN2	67.8038	-2.46483	0.676088	-3.75438	0.000173768	0.00667642	327.05	54.5865	4.74261	4.30136	16.1421	0
ENSG00000204262	COL5A2	52660.6	-2.46263	0.525598	-4.67568	2.9298e-06	0.00023059	106173	21798.2	156536	14322.8	11788	5345.71
ENSG00000158270	COLEC12	604.832	-2.44808	0.513113	-5.18153	2.20071e-07	2.44211e-05	1103.99	1388.54	566.268	429.419	112.995	27.7747
ENSG00000170571	EMB	275.338	-2.44063	0.480987	-5.10827	3.25123e-07	3.41685e-05	575.129	255.874	604.208	126.89	39.9305	49.9945
ENSG00000106809	OGN	11634.3	-2.43969	0.505598	-4.80662	1.53502e-06	0.000131218	21438.5	5501.87	35184.5	4596.72	1852.95	1231.35
ENSG00000125879	OTOR	21.2365	-2.43852	0.739534	-3.1242	0.0017829	0.0408901	102.103	23.8816	0	1.43379	0	0
ENSG00000157613	CREB3L1	1492.52	-2.42753	0.418152	-5.86082	4.60581e-09	7.48067e-07	3284.86	1983.31	2370.36	768.51	268.469	279.599
ENSG00000140945	CDH13	382.89	-2.42344	0.538483	-4.51085	6.45674e-06	0.00044539	246.484	338.891	1483.49	37.9954	136.783	53.6978
ENSG00000132561	MATN2	1827.99	-2.41697	0.461012	-5.5017	3.76143e-08	4.90524e-06	4142.37	1509.09	3457.36	1410.13	134.235	314.78
ENSG00000164708	PGAM2	84.4644	-2.41575	0.631958	-4.31698	1.58179e-05	0.000974489	132.415	193.327	122.359	48.0319	5.09751	5.55494
ENSG00000073050	XRCC1	29.098	-2.40548	0.718233	-3.62398	0.000290103	0.010123	18.3467	131.917	13.2793	0	11.0446	0
ENSG00000100170	SLC5A1	36.4357	-2.403	0.719541	-3.6498	0.000262446	0.009359	18.3467	19.3327	172.631	6.45204	0	1.85165
ENSG00000198576	ARC	2470.12	-2.39942	0.620739	-3.58923	0.000331655	0.0112649	108.485	7638.7	5987.07	366.333	507.203	212.939
ENSG00000143603	KCNN3	84.0209	-2.39634	0.573396	-4.12092	3.77369e-05	0.00195752	254.461	114.859	80.6244	22.2237	15.2925	16.6648
ENSG00000005102	MEOX1	173.693	-2.39428	0.605415	-4.3149	1.59676e-05	0.000976978	329.443	86.4287	499.871	108.968	11.8942	5.55494
ENSG00000138311	ZNF365	334.582	-2.39388	0.496508	-4.92977	8.23256e-07	7.74121e-05	385.281	889.305	461.93	108.968	134.235	27.7747
ENSG00000235531	RP11-383H13.1	154.571	-2.38837	0.668683	-3.66706	0.000245358	0.00882004	212.184	22.7444	639.304	17.2054	32.2842	3.70329
ENSG00000087494	PTHLH	124.44	-2.37343	0.53956	-4.36598	1.26552e-05	0.000807494	129.225	338.891	191.601	30.1095	27.1867	29.6264
ENSG00000111799	COL12A1	73776.5	-2.36638	0.425678	-5.57392	2.49064e-08	3.29613e-06	100377	103492	177378	26257.7	19519.2	15635.3
ENSG00000122694	GLIPR2	484.46	-2.35852	0.480472	-5.15096	2.59151e-07	2.82316e-05	1403.12	672.097	360.438	332.639	118.092	20.3681
ENSG00000113070	HBEGF	552.808	-2.3467	0.536419	-4.55366	5.27213e-06	0.000374799	694.782	720.997	1474.95	245.894	137.633	42.5879
ENSG00000120708	TGFBI	5176.06	-2.34662	0.494609	-4.89727	9.71763e-07	8.94924e-05	8565.52	14541.6	3484.87	3209.53	636.34	618.45
ENSG00000185274	WBSCR17	544.283	-2.34443	0.440846	-5.33412	9.60091e-08	1.17486e-05	894.202	544.728	1363.03	220.086	80.7106	162.945
ENSG00000145936	KCNMB1	359.006	-2.32932	0.499691	-4.925	8.43584e-07	7.89083e-05	816.03	468.534	500.82	283.89	45.8776	38.8846
ENSG00000082482	KCNK2	153.969	-2.32675	0.550825	-4.37256	1.22797e-05	0.00078917	200.218	371.871	229.542	71.6894	35.6826	14.8132
ENSG00000243649	CFB	151.93	-2.32183	0.514964	-4.52761	5.96548e-06	0.000419603	302.322	229.718	256.101	27.9588	39.9305	55.5494
ENSG00000077279	DCX	157.735	-2.32162	0.572273	-3.84776	0.000119204	0.00495279	134.808	52.3121	678.193	41.5798	13.5934	25.9231
ENSG00000049192	ADAMTS6	1994.69	-2.31038	0.432469	-5.36065	8.29248e-08	1.02884e-05	4117.64	3804	2315.34	577.099	428.191	725.846
ENSG00000106511	MEOX2	698.621	-2.30118	0.516453	-4.26291	2.0178e-05	0.00118197	935.682	200.151	2635.94	119.004	123.19	177.758
ENSG00000163453	IGFBP7	9814.86	-2.30074	0.444343	-5.18418	2.16963e-07	2.42266e-05	9504.39	10527.2	30884.8	3530.7	1466.38	2975.6
ENSG00000223953	C1QTNF5	1449.34	-2.30003	0.435992	-5.37259	7.76128e-08	9.69671e-06	2917.13	2031.07	2343.8	806.505	192.006	405.511
ENSG00000154175	ABI3BP	2046.47	-2.29668	0.467122	-5.07567	3.86135e-07	3.91971e-05	3337.5	1672.85	5310.77	1324.82	210.697	422.176
ENSG00000165125	TRPV6	39.7904	-2.29526	0.686564	-3.25501	0.00113386	0.0296427	197.825	9.09775	12.3308	18.6392	0.849585	0
ENSG00000006283	CACNA1G	1003.65	-2.29452	0.476238	-4.81073	1.5038e-06	0.000129792	3371.81	913.187	970.338	243.027	149.527	374.033
ENSG00000077782	FGFR1	11684.8	-2.29443	0.398849	-5.75065	8.89013e-09	1.32359e-06	19339.8	15482.1	24843.7	3285.52	3732.23	3425.55
ENSG00000134508	CABLES1	526.233	-2.29238	0.454931	-5.00015	5.7285e-07	5.71762e-05	976.364	350.264	1402.86	211.484	84.9585	131.467
ENSG00000198542	ITGBL1	6621.99	-2.29021	0.469693	-4.82961	1.36801e-06	0.000120994	11936.5	3889.29	18943.9	1600.82	1807.92	1553.53
ENSG00000183160	TMEM119	2241.05	-2.28982	0.459021	-5.09898	3.41488e-07	3.54711e-05	5636.43	2116.37	3593.95	1296.86	567.523	235.159
ENSG00000106366	SERPINE1	30628.9	-2.28938	0.471809	-4.85393	1.21036e-06	0.000108121	17012.2	73219.9	68568.6	6328.74	14522	4121.77
ENSG00000095752	IL11	2612.94	-2.28741	0.478047	-4.55383	5.26784e-06	0.000374799	387.674	10099.6	3318.88	202.881	1379.73	288.857
ENSG00000162407	PPAP2B	1333.32	-2.28702	0.467172	-4.93381	8.06402e-07	7.67667e-05	2218.36	1299.84	3365.36	281.022	533.54	301.818
ENSG00000179772	FOXS1	54.9993	-2.28194	0.704016	-4.08226	4.46003e-05	0.0022573	56.6355	147.839	99.5948	22.2237	0	3.70329
ENSG00000077522	ACTN2	200.885	-2.26674	0.542286	-4.07224	4.65626e-05	0.00231103	99.7104	118.271	865.052	45.8812	15.2925	61.1044
ENSG00000196562	SULF2	3712.09	-2.25183	0.482435	-4.80016	1.58536e-06	0.000134876	5168.98	4714.91	8983.45	2046.01	855.533	503.648
ENSG00000129514	FOXA1	28.2438	-2.25055	0.718716	-3.32855	0.000873004	0.0241441	110.878	26.156	22.7645	2.86757	6.79668	0
ENSG00000015133	CCDC88C	208.971	-2.24795	0.502494	-4.38422	1.164e-05	0.00075348	511.315	92.1148	486.592	90.3286	27.1867	46.2912
ENSG00000188322	SBK1	242.303	-2.24595	0.468507	-4.78482	1.71138e-06	0.000144224	746.631	250.188	245.667	124.023	48.4264	38.8846
ENSG00000140511	HAPLN3	2490.39	-2.24516	0.42668	-5.21336	1.85455e-07	2.09759e-05	3304	2016.29	7563.51	589.287	619.348	849.906
ENSG00000189320	FAM180A	1600.92	-2.2393	0.449848	-5.0928	3.52817e-07	3.6436e-05	754.608	3863.13	3326.47	133.342	1244.64	283.302
ENSG00000138376	BARD1	433.131	-2.23702	0.528798	-4.22594	2.37948e-05	0.00137135	1457.37	185.367	639.304	162.018	112.145	42.5879
ENSG00000171502	COL24A1	791.357	-2.23701	0.47265	-4.96901	6.72961e-07	6.56907e-05	2547	1072.4	367.078	376.369	359.375	25.9231
ENSG00000007062	PROM1	276.564	-2.23324	0.480699	-4.48205	7.39278e-06	0.000498413	801.671	52.3121	588.084	94.63	15.2925	107.396
ENSG00000239732	TLR9	13.3918	-2.22386	0.737471	-3.42909	0.000605617	0.0179435	6.38146	17.0583	56.9113	0	0	0
ENSG00000171840	NINJ2	194.806	-2.22158	0.504561	-4.45507	8.38653e-06	0.000557003	278.391	388.929	328.189	67.388	78.1619	27.7747
ENSG00000136999	NOV	382.558	-2.22139	0.563373	-4.05258	5.06552e-05	0.00246595	1345.69	159.211	524.533	97.4975	135.084	33.3296
ENSG00000106025	TSPAN12	542.655	-2.21789	0.506921	-4.50644	6.59257e-06	0.000453011	1289.85	431.006	1033.89	324.753	128.287	48.1428
ENSG00000152580	IGSF10	296.475	-2.21352	0.47162	-4.69353	2.68533e-06	0.000213069	289.559	535.63	690.524	60.936	129.987	72.2142
ENSG00000100078	PLA2G3	93.0882	-2.21256	0.580956	-3.94445	7.99817e-05	0.00358682	358.957	88.7031	31.3012	66.6711	11.0446	1.85165
ENSG00000171033	PKIA	106.197	-2.21089	0.599436	-3.72251	0.000197254	0.00734198	159.537	85.2914	320.6	25.8082	34.833	11.1099
ENSG00000104881	PPP1R13L	643.586	-2.20134	0.429544	-5.11373	3.15853e-07	3.37765e-05	863.89	912.05	1495.82	192.127	201.352	196.275
ENSG00000123560	PLP1	143.504	-2.19937	0.64372	-3.15533	0.00160315	0.0381383	158.739	30.7049	607.054	39.4291	19.5405	5.55494
ENSG00000231631	PSMB8	12.8542	-2.19369	0.736672	-3.60477	0.00031243	0.0107551	37.4911	15.9211	23.713	0	0	0
ENSG00000146250	PRSS35	3853.39	-2.18462	0.466062	-4.89229	9.96715e-07	9.13195e-05	10288.5	3253.58	5302.24	3185.88	758.68	331.445
ENSG00000144229	THSD7B	33.4136	-2.18121	0.678408	-3.15604	0.00159924	0.0380961	102.103	19.3327	59.7569	12.1872	3.39834	3.70329
ENSG00000143126	CELSR2	323.159	-2.18032	0.478533	-4.63278	3.6078e-06	0.000279034	751.417	365.047	506.511	189.977	81.5602	44.4395
ENSG00000086991	NOX4	169.562	-2.17898	0.557191	-4.22376	2.40263e-05	0.00138024	288.761	193.327	365.181	129.041	16.9917	24.0714
ENSG00000055163	CYFIP2	369.053	-2.16531	0.480322	-4.59421	4.34393e-06	0.000322027	606.239	768.76	476.158	213.634	77.3123	72.2142
ENSG00000262655	SPON1	447.581	-2.16029	0.531984	-3.97853	6.93419e-05	0.00318473	1266.72	158.073	928.603	154.132	111.296	66.6593
ENSG00000183496	MEX3B	647.585	-2.15243	0.453742	-4.76765	1.86389e-06	0.000154885	989.924	777.858	1501.51	303.963	162.271	149.983
ENSG00000164932	CTHRC1	2414.91	-2.14263	0.455012	-4.78375	1.72055e-06	0.000144316	3000.88	3965.48	5124.86	1288.26	578.568	531.423
ENSG00000164604	GPR85	42.9405	-2.13927	0.663086	-3.3632	0.000770449	0.0218904	157.941	50.0376	18.0219	27.242	2.54876	1.85165
ENSG00000133116	KL	67.1982	-2.13887	0.654987	-3.62745	0.000286237	0.0100273	192.242	60.2726	96.7492	43.7305	10.195	0
ENSG00000106823	ECM2	589.711	-2.13175	0.595154	-3.73116	0.000190596	0.00715377	579.118	330.931	2212.9	306.83	80.7106	27.7747
ENSG00000167604	NFKBID	145.939	-2.12613	0.582118	-3.61658	0.000298521	0.0103561	63.8146	382.106	325.343	45.1643	31.4347	27.7747
ENSG00000133110	POSTN	231559	-2.12363	0.461026	-4.58565	4.52569e-06	0.000328736	212807	188410	791469	37169.5	89355.2	70144.1
ENSG00000145703	IQGAP2	377.766	-2.12256	0.477313	-4.59192	4.39188e-06	0.000324237	917.335	623.196	306.373	306.83	62.8693	49.9945
ENSG00000229006	TRIM27	17.2587	-2.12181	0.735016	-3.27377	0.00106123	0.0281722	31.9073	71.6448	0	0	0	0
ENSG00000186472	PCLO	610.92	-2.1198	0.573008	-3.10538	0.00190037	0.0428145	2952.22	369.596	71.1391	96.0637	117.243	59.2527
ENSG00000161681	SHANK1	126.042	-2.11527	0.562474	-3.74135	0.000183036	0.00689901	394.055	75.0565	186.859	52.3332	33.1338	14.8132
ENSG00000146072	TNFRSF21	413.697	-2.10652	0.567013	-4.13125	3.6079e-05	0.00191841	1340.11	250.188	470.467	329.054	84.9585	7.40659
ENSG00000163638	ADAMTS9	658.607	-2.10592	0.44492	-4.77076	1.83529e-06	0.000153221	959.612	688.018	1641.89	325.47	107.048	229.604
ENSG00000136295	TTYH3	6023.16	-2.10533	0.392083	-5.37338	7.72757e-08	9.69671e-06	14332.8	6907.47	8694.15	3081.21	1603.17	1520.2
ENSG00000151240	DIP2C	3585.55	-2.10495	0.426666	-4.90235	9.46965e-07	8.81171e-05	5960.29	2987.48	9214.89	1025.87	1093.42	1231.35
ENSG00000177570	SAMD12	95.6073	-2.10441	0.570227	-3.63894	0.000273758	0.00964687	90.1382	122.82	286.454	26.5251	25.4876	22.2198
ENSG00000006118	TMEM132A	633.941	-2.1032	0.463019	-4.59436	4.34088e-06	0.000322027	1509.22	570.884	1084.16	370.634	172.466	96.2857
ENSG00000218497	ZNF84	165.726	-2.09681	0.507673	-4.17813	2.93915e-05	0.00163585	410.807	244.502	175.477	97.4975	27.1867	38.8846
ENSG00000139318	DUSP6	392.406	-2.08456	0.498124	-4.28978	1.78847e-05	0.00107224	583.904	608.412	769.251	176.356	166.519	49.9945
ENSG00000187498	COL4A1	14542.8	-2.07921	0.520586	-4.06757	4.75057e-05	0.00234458	24490.5	8785.02	40866.1	8283.71	3365.21	1466.5
ENSG00000101670	LIPG	405.369	-2.07734	0.502849	-4.11558	3.86205e-05	0.00198846	436.332	391.203	1254.89	167.753	96.8527	85.1758
ENSG00000111432	FZD10	70.1528	-2.07328	0.671958	-3.14229	0.00167632	0.0393033	53.4447	52.3121	277.917	10.7534	24.638	1.85165
ENSG00000017373	SRCIN1	89.7717	-2.07221	0.591391	-3.39767	0.00067963	0.019808	338.218	73.9193	62.6024	24.3744	13.5934	25.9231
ENSG00000124479	NDP	107.893	-2.07197	0.567872	-3.90107	9.57699e-05	0.00419369	136.404	147.839	244.719	15.7717	11.8942	90.7307
ENSG00000196878	LAMB3	2090.77	-2.06955	0.58451	-3.05843	0.00222502	0.047952	177.883	9223.99	2063.98	346.26	389.96	342.555
ENSG00000153714	LURAP1L	334.175	-2.06201	0.474302	-4.30732	1.65243e-05	0.00100758	524.875	204.699	966.544	153.415	51.8247	103.692
ENSG00000272781	MDGA2	80.7478	-2.06063	0.684847	-3.71435	0.000203726	0.00753574	157.941	57.9982	215.314	10.7534	42.4793	0
ENSG00000135363	LMO2	69.603	-2.06047	0.592702	-3.40233	0.000668133	0.0195366	195.432	127.369	38.8894	28.6757	16.1421	11.1099
ENSG00000112210	RAB23	644.493	-2.05424	0.541223	-3.85423	0.000116093	0.00487298	1266.72	316.147	1702.6	390.707	133.385	57.4011
ENSG00000103647	CORO2B	146.057	-2.05338	0.594013	-3.85454	0.000115946	0.00487298	385.281	191.053	156.506	83.8765	57.7718	1.85165
ENSG00000164188	RANBP3L	220.658	-2.05226	0.628024	-3.44238	0.000576618	0.0173918	259.247	161.485	750.281	66.6711	80.7106	5.55494
ENSG00000182107	TMEM30B	994.724	-2.04484	0.471457	-4.37316	1.22462e-05	0.00078917	1895.29	938.206	2151.25	395.725	402.704	185.165
ENSG00000175093	SPSB4	154.381	-2.04189	0.57523	-3.76043	0.000169619	0.00655935	130.82	485.593	171.682	74.5569	54.3735	9.25824
ENSG00000091972	CD200	124.42	-2.03483	0.632683	-3.38136	0.000721282	0.0207845	218.565	54.5865	374.666	78.8583	16.1421	3.70329
ENSG00000167971	CASKIN1	152.296	-2.03335	0.621454	-3.20341	0.00135813	0.0341751	105.294	614.098	100.543	49.4657	11.0446	33.3296
ENSG00000263521	HIST2H2AC	11.6882	-2.03106	0.733083	-3.3796	0.000725903	0.020884	11.1676	40.9399	18.0219	0	0	0
ENSG00000182575	NXPH3	142.152	-2.031	0.519683	-3.86332	0.000111857	0.00475818	535.245	104.624	86.3155	83.8765	28.0363	14.8132
ENSG00000150630	VEGFC	81.6004	-2.02353	0.577817	-3.61099	0.000305031	0.010541	236.114	95.5264	77.7788	56.6346	16.1421	7.40659
ENSG00000266302	RP11-219A15.1	25.7489	-2.02228	0.722539	-3.14463	0.00166295	0.0390925	47.0633	25.0188	69.2421	11.4703	1.69917	0
ENSG00000206478	IER3	9381.06	-2.02113	0.530799	-4.11936	3.79926e-05	0.00196178	6797.06	25818.3	13987.9	4104.22	5077.12	501.796
ENSG00000104177	MYEF2	384.12	-2.01915	0.460203	-4.41432	1.01327e-05	0.000664121	1048.95	318.421	531.172	248.762	92.6048	64.8077
ENSG00000117122	MFAP2	7157.63	-2.01691	0.396598	-5.08125	3.74956e-07	3.82798e-05	15834	9847.18	9640.78	2805.2	2087.43	2731.18
ENSG00000213316	LTC4S	163.568	-2.01554	0.631994	-4.22063	2.43625e-05	0.00139507	185.86	479.907	147.021	145.529	21.2396	1.85165
ENSG00000165495	PKNOX2	557.107	-2.01318	0.609002	-3.83938	0.000123345	0.00508934	879.046	730.095	1196.09	331.205	198.803	7.40659
ENSG00000138759	FRAS1	879.926	-2.00114	0.558562	-3.71798	0.000200822	0.00744374	2428.94	284.305	1692.16	680.332	151.226	42.5879
ENSG00000178531	CTXN1	74.0096	-1.99859	0.633703	-3.52982	0.000415836	0.0134834	253.663	76.1937	40.7864	62.3697	11.0446	0
ENSG00000165124	SVEP1	784.622	-1.99704	0.431288	-4.58735	4.48918e-06	0.000328736	2543.01	669.822	725.619	387.839	144.43	237.011
ENSG00000091622	PITPNM3	503.22	-1.99423	0.430388	-4.6203	3.83181e-06	0.000290081	705.949	573.159	1212.21	181.374	129.987	216.643
ENSG00000123610	TNFAIP6	52.0214	-1.99106	0.664595	-3.0929	0.00198212	0.0438274	39.0865	92.1148	145.124	19.3561	12.7438	3.70329
ENSG00000138944	KIAA1644	69.971	-1.98871	0.625595	-3.20397	0.00135546	0.0341561	130.82	37.5282	194.447	39.4291	10.195	7.40659
ENSG00000154721	JAM2	331.932	-1.98563	0.506926	-3.88457	0.00010251	0.00443448	520.887	233.13	934.294	93.9131	122.34	87.0274
ENSG00000162267	ITIH3	80.5106	-1.9837	0.609721	-3.42206	0.000621481	0.0183527	315.085	32.9794	55.9628	69.5387	7.64627	1.85165
ENSG00000119866	BCL11A	274.041	-1.98014	0.502762	-4.04256	5.28711e-05	0.00255296	461.858	401.438	483.746	93.1962	161.421	42.5879
ENSG00000188611	ASAH2	38.9734	-1.97877	0.694384	-3.16461	0.00155293	0.0374422	45.4679	110.31	52.1687	18.6392	1.69917	5.55494
ENSG00000106624	AEBP1	19548.8	-1.97864	0.386355	-5.12545	2.9683e-07	3.19468e-05	27257.6	26442.6	41710.3	6137.33	5764.44	9980.38
ENSG00000164100	NDST3	134.531	-1.97052	0.556865	-3.617	0.000298032	0.0103561	335.824	120.545	220.057	66.6711	49.276	14.8132
ENSG00000157680	DGKI	274.301	-1.96963	0.488256	-3.98775	6.67024e-05	0.0031115	180.276	558.375	639.304	73.1231	68.8164	125.912
ENSG00000040731	CDH10	31.2258	-1.96878	0.704902	-3.16017	0.00157675	0.0377611	78.1729	45.4888	40.7864	19.3561	1.69917	1.85165
ENSG00000154096	THY1	1454.7	-1.96599	0.403387	-4.86522	1.14331e-06	0.000102645	4471.01	1286.2	1384.84	958.487	340.684	287.005
ENSG00000129038	LOXL1	1633.87	-1.95207	0.401059	-4.87998	1.06097e-06	9.67106e-05	3413.28	2416.59	2106.67	906.153	510.601	449.95
ENSG00000124212	PTGIS	998.039	-1.95185	0.50275	-3.92378	8.71688e-05	0.00384533	1579.41	826.758	2593.26	441.606	391.659	155.538
ENSG00000198732	SMOC1	624.547	-1.95064	0.505004	-3.95814	7.55358e-05	0.0034339	481.003	1761.55	866.949	314.716	237.884	85.1758
ENSG00000115263	GCG	10.9498	-1.94699	0.730378	-3.31189	0.000926666	0.0252375	28.7166	11.3722	25.6101	0	0	0
ENSG00000198108	CHSY3	2862.24	-1.94683	0.507993	-3.76182	0.000168683	0.00655149	2776.73	1868.45	10111.2	789.3	1061.13	566.604
ENSG00000166482	MFAP4	19400.3	-1.94672	0.444123	-4.49843	6.84581e-06	0.000465047	36251.5	20591.6	35757.4	15532.9	4511.3	3756.99
ENSG00000070190	DAPP1	142.727	-1.94493	0.524095	-3.64076	0.000271835	0.00961704	241.698	84.1542	394.585	35.1278	32.2842	68.5109
ENSG00000197461	PDGFA	1872.72	-1.94168	0.408685	-4.74493	2.08581e-06	0.000172254	2059.62	3570.87	3534.19	630.149	835.992	605.489
ENSG00000125378	BMP4	364.112	-1.93988	0.469028	-4.09723	4.18121e-05	0.00212825	725.094	267.247	822.368	164.169	100.251	105.544
ENSG00000081277	PKP1	223.894	-1.93922	0.491277	-3.97901	6.92031e-05	0.00318473	267.224	458.299	377.512	84.5934	111.296	44.4395
ENSG00000149970	CNKSR2	249.625	-1.93566	0.529466	-3.67135	0.00024127	0.00869235	316.68	180.818	765.457	45.8812	112.995	75.9175
ENSG00000150054	MPP7	314.727	-1.93361	0.541238	-3.22048	0.00127977	0.032757	173.097	88.7031	1429.42	65.2373	46.7272	85.1758
ENSG00000174600	CMKLR1	674.76	-1.93304	0.466185	-4.17505	2.97921e-05	0.00164788	638.944	1192.94	1483.49	205.748	384.862	142.577
ENSG00000112208	BAG2	302.056	-1.93218	0.460892	-4.23897	2.24549e-05	0.00129832	597.464	234.267	635.51	184.959	41.6297	118.505
ENSG00000077942	FBLN1	6826.06	-1.92965	0.401524	-4.81581	1.46604e-06	0.000127767	13022.2	6470.78	13622.7	3947.93	1602.32	2290.49
ENSG00000179862	CITED4	780.802	-1.92726	0.48018	-3.75588	0.000172735	0.00665106	150.762	2637.21	1234.03	83.8765	275.266	303.67
ENSG00000122641	INHBA	2629.92	-1.92536	0.50381	-3.94334	8.03545e-05	0.00358903	2097.11	5415.44	5454	1230.19	323.692	1259.12
ENSG00000039560	RAI14	1464.16	-1.92528	0.447088	-4.35226	1.34742e-05	0.000850635	3781.02	1128.12	2201.52	1020.14	417.146	237.011
ENSG00000148204	CRB2	34.4134	-1.92392	0.698557	-3.0446	0.0023299	0.0496138	74.9822	65.9587	39.8379	17.2054	8.49585	0
ENSG00000088387	DOCK9	499.46	-1.92065	0.456939	-4.17024	3.04275e-05	0.00167329	1057.73	378.694	1039.58	225.105	151.226	144.428
ENSG00000165757	KIAA1462	845.952	-1.91729	0.5455	-3.49972	0.00046575	0.0146241	1474.12	377.557	2477.54	347.693	291.408	107.396
ENSG00000176788	BASP1	2294.63	-1.9155	0.412359	-4.67301	2.96822e-06	0.000232589	3682.9	3725.53	3667.93	1291.13	717.05	683.258
ENSG00000137809	ITGA11	5111.49	-1.91337	0.42175	-4.49135	7.07741e-06	0.000478958	12227.7	3652.75	9416.93	2003.72	1519.91	1847.94
ENSG00000130294	KIF1A	1042.61	-1.8977	0.451705	-4.16	3.18249e-05	0.00173349	2977.75	715.311	1491.08	468.848	350.879	251.824
ENSG00000134871	COL4A2	20889.1	-1.89432	0.425327	-4.44471	8.80122e-06	0.00058238	31548.4	18474.1	52260.7	10958.4	5532.5	6560.39
ENSG00000164574	GALNT10	4053.97	-1.89315	0.412307	-4.58562	4.52642e-06	0.000328736	6413.37	4534.09	8799.44	1800.12	1441.75	1335.04
ENSG00000183722	LHFP	1789.43	-1.89137	0.462498	-4.16418	3.12476e-05	0.00170725	3126.12	1808.18	3705.88	1214.42	550.531	331.445
ENSG00000014914	MTMR11	1567.6	-1.88487	0.406601	-4.62652	3.71861e-06	0.000283917	2173.69	1933.27	3508.58	506.844	598.108	685.109
ENSG00000185739	SRL	63.8413	-1.87988	0.662979	-3.21217	0.00131736	0.0334868	134.011	90.9775	99.5948	32.9771	25.4876	0
ENSG00000095713	CRTAC1	877.402	-1.87439	0.47906	-3.90975	9.23935e-05	0.00405578	780.931	2717.95	866	435.154	282.912	181.461
ENSG00000108691	CCL2	89.4487	-1.87188	0.563515	-3.41154	0.000645969	0.019013	261.64	118.271	57.8598	70.9725	18.6909	9.25824
ENSG00000163909	HEYL	183.377	-1.8714	0.528732	-3.76381	0.000167345	0.0065422	492.17	195.602	179.271	173.488	15.2925	44.4395
ENSG00000133056	PIK3C2B	315.033	-1.87129	0.552613	-3.64208	0.000270448	0.00958694	834.376	193.327	486.592	285.324	73.9139	16.6648
ENSG00000122176	FMOD	30761.7	-1.86662	0.482866	-3.83008	0.000128102	0.00519689	20463	37389.5	96137.4	7756.07	16104.7	6719.63
ENSG00000009694	TENM1	174.787	-1.86558	0.532659	-3.48778	0.000487051	0.0151597	488.182	131.917	255.152	62.3697	72.2148	38.8846
ENSG00000221866	PLXNA4	519.355	-1.8654	0.473022	-4.02021	5.81453e-05	0.0027702	721.903	826.758	953.265	322.602	186.059	105.544
ENSG00000181754	AMIGO1	97.9255	-1.86449	0.635466	-3.22138	0.00127575	0.032757	231.328	75.0565	185.91	64.5204	28.8859	1.85165
ENSG00000081041	CXCL2	179.453	-1.86327	0.595541	-3.83403	0.000126061	0.0051656	413.997	378.694	38.8894	228.689	12.7438	3.70329
ENSG00000139292	LGR5	120.027	-1.86258	0.568803	-3.42297	0.000619406	0.0183217	428.356	28.4305	118.565	129.758	7.64627	7.40659
ENSG00000167874	TMEM88	149.684	-1.85863	0.612218	-3.29361	0.000989105	0.0264146	89.3405	357.087	310.167	79.5752	52.6743	9.25824
ENSG00000172986	GXYLT2	1664.39	-1.85408	0.417957	-4.42009	9.86585e-06	0.000650418	2436.12	1791.12	3868.07	607.926	640.587	642.522
ENSG00000163739	CXCL1	92.5279	-1.85386	0.635253	-3.37574	0.000736179	0.0211117	260.842	167.171	18.9704	101.082	3.39834	3.70329
ENSG00000100036	SLC35E4	672.703	-1.84056	0.483454	-3.58671	0.000334875	0.0113527	152.357	1696.73	1550.83	102.516	324.542	209.236
ENSG00000088992	TESC	95.6983	-1.83895	0.575351	-3.24611	0.00116995	0.03047	122.843	230.856	120.462	25.0913	21.2396	53.6978
ENSG00000138316	ADAMTS14	198.234	-1.83852	0.539926	-3.30071	0.000964414	0.0259883	691.591	189.916	129.947	55.9177	53.5239	68.5109
ENSG00000174171	RP11-23P13.6	37.0146	-1.83829	0.694946	-3.10701	0.00188991	0.0426326	66.2077	84.1542	39.8379	25.0913	6.79668	0
ENSG00000166923	GREM1	3920.51	-1.8379	0.481471	-4.24183	2.21706e-05	0.00128604	8859.86	5946.52	2770.63	4482.02	1265.88	198.126
ENSG00000196154	S100A4	412.583	-1.83321	0.494263	-3.58162	0.000341467	0.0115306	211.386	487.867	1392.43	102.516	146.129	135.17
ENSG00000131389	SLC6A6	1444.41	-1.83039	0.493684	-3.75112	0.000176046	0.00673498	1553.89	1348.74	4191.52	899.701	355.976	316.632
ENSG00000120149	MSX2	950.151	-1.8258	0.488663	-4.13757	3.51001e-05	0.00188885	2125.82	1496.58	644.046	1099	285.461	49.9945
ENSG00000164983	TMEM65	737.095	-1.82277	0.521204	-3.67717	0.000235837	0.008552	1238	807.426	1505.3	445.191	352.578	74.0659
ENSG00000163359	COL6A3	10600.9	-1.82163	0.408241	-4.50392	6.67125e-06	0.000456661	14800.2	19610.2	15760.6	3951.52	6894.39	2588.6
ENSG00000184254	ALDH1A3	80.1323	-1.82092	0.587963	-3.05088	0.00228169	0.0487615	307.108	29.5677	65.448	60.2191	11.0446	7.40659
ENSG00000112175	BMP5	1233.86	-1.82076	0.450179	-4.12403	3.72305e-05	0.00195752	1406.31	1989	2447.19	314.716	931.146	314.78
ENSG00000135472	FAIM2	100.268	-1.82	0.545265	-3.37655	0.000734014	0.0210834	178.681	222.895	89.1611	50.1826	45.8776	14.8132
ENSG00000134013	LOXL2	8266.08	-1.81896	0.467557	-3.93029	8.48444e-05	0.00377083	6657.46	17989.7	15501.7	4358	3193.59	1896.09
ENSG00000145423	SFRP2	1558.07	-1.81784	0.466014	-4.06639	4.7747e-05	0.00234999	3339.9	1799.08	2137.97	1304.03	578.568	188.868
ENSG00000017483	SLC38A5	264.911	-1.8173	0.515457	-3.75188	0.00017551	0.0067289	285.57	550.414	410.71	25.0913	112.145	205.533
ENSG00000083857	FAT1	8438.77	-1.81382	0.451656	-4.10773	3.9956e-05	0.00204543	15751.8	9339.98	14867.1	5968.14	3244.57	1460.95
ENSG00000091428	RAPGEF4	294.131	-1.81137	0.537097	-3.38286	0.000717358	0.0207049	856.711	454.888	154.609	116.137	50.9751	131.467
ENSG00000139278	GLIPR1	1135.74	-1.80649	0.441622	-4.1221	3.75431e-05	0.00195752	1045.76	1074.67	3352.08	486.054	170.767	685.109
ENSG00000143816	WNT9A	281.483	-1.80551	0.575084	-3.60231	0.000315403	0.0108365	463.454	296.814	555.834	297.511	58.6214	16.6648
ENSG00000170382	LRRN2	195.777	-1.80353	0.505341	-3.71026	0.000207044	0.00764267	455.477	222.895	239.976	180.657	44.1784	31.478
ENSG00000133401	PDZD2	841.023	-1.80248	0.515405	-3.57055	0.000356236	0.0118547	1436.63	572.021	2118.05	229.406	491.91	198.126
ENSG00000145431	PDGFC	1103.07	-1.80082	0.438804	-4.17742	2.94834e-05	0.00163587	2270.21	1361.25	1566.01	791.451	423.943	205.533
ENSG00000114861	FOXP1	639.934	-1.8007	0.452063	-3.97029	7.1786e-05	0.00328012	1287.46	532.219	1282.4	331.922	225.99	179.61
ENSG00000138829	FBN2	31728	-1.79984	0.473964	-3.72832	0.000192759	0.00718964	53436	16809.2	87356	13978	10499.2	8289.82
ENSG00000102452	NALCN	492.708	-1.79783	0.467434	-3.85402	0.000116192	0.00487298	719.51	533.356	1135.38	173.488	246.38	148.132
ENSG00000109452	INPP4B	488.543	-1.79627	0.535641	-3.3156	0.000914463	0.0249813	514.505	226.307	1735.8	88.1779	218.343	148.132
ENSG00000143179	UCK2	690.835	-1.79508	0.524813	-3.54418	0.000393839	0.0129583	502.54	1441.99	1420.89	394.291	287.16	98.1373
ENSG00000173918	C1QTNF1	2138.78	-1.79318	0.445019	-4.13483	3.55212e-05	0.00190007	5020.62	1423.8	3464	2118.42	398.456	407.362
ENSG00000171476	HOPX	476.022	-1.79166	0.448802	-4.05077	5.10488e-05	0.00247836	1003.48	521.984	718.98	367.05	131.686	112.95
ENSG00000148848	ADAM12	1864.46	-1.78901	0.487443	-3.86553	0.000110846	0.00473775	2233.51	2431.37	4033.12	376.369	1695.77	416.621
ENSG00000180672	AC007362.1	136.652	-1.78624	0.536505	-3.43673	0.000588789	0.0176087	265.628	131.917	255.152	110.402	27.1867	29.6264
ENSG00000206376	EHMT2	205.332	-1.78074	0.630849	-3.57998	0.000343618	0.0115614	443.512	304.775	239.976	83.1597	160.572	0
ENSG00000137502	RAB30	443.309	-1.77977	0.58167	-3.48611	0.000490097	0.0151752	900.584	434.418	798.655	221.52	288.009	16.6648
ENSG00000184985	SORCS2	752.003	-1.77863	0.431872	-4.07222	4.65672e-05	0.00231103	2020.53	524.258	1106.93	407.196	212.396	240.714
ENSG00000145861	C1QTNF2	189.898	-1.77847	0.600787	-3.44848	0.000563748	0.0171	274.403	178.543	446.754	197.146	31.4347	11.1099
ENSG00000138449	SLC40A1	811.237	-1.77263	0.526298	-3.49151	0.000480302	0.0149757	2213.57	476.495	1270.07	354.862	446.882	105.544
ENSG00000129467	ADCY4	477.099	-1.76954	0.505061	-3.67206	0.000240607	0.00869235	934.884	758.525	552.988	146.246	86.6577	383.291
ENSG00000196083	IL1RAP	889.171	-1.76925	0.51413	-3.47601	0.000508927	0.0156767	1328.94	650.489	2389.33	343.392	456.227	166.648
ENSG00000145794	MEGF10	937.818	-1.76802	0.532094	-3.42999	0.000603601	0.0179135	1058.53	773.309	2763.04	250.196	624.445	157.39
ENSG00000183092	BEGAIN	82.7053	-1.76182	0.61071	-3.27845	0.00104381	0.027751	208.993	161.485	26.5586	74.5569	24.638	0
ENSG00000130635	COL5A1	53285.8	-1.7606	0.427751	-4.13173	3.60048e-05	0.00191841	88792.5	58513.3	106697	25490.6	25361.8	14859.5
ENSG00000163485	ADORA1	79.1957	-1.75507	0.572056	-3.05224	0.00227139	0.0485996	125.236	199.013	66.3965	37.2785	30.5851	16.6648
ENSG00000198795	ZNF521	1010.01	-1.75297	0.438967	-3.99877	6.36729e-05	0.00300153	1950.33	1000.75	1875.23	516.163	432.439	285.154
ENSG00000144810	COL8A1	15740.1	-1.75069	0.424171	-4.12053	3.78005e-05	0.00195752	17486.8	19142.8	38827.7	5061.99	8184.91	5736.4
ENSG00000074660	SCARF1	226.028	-1.74817	0.498946	-3.54986	0.000385434	0.0127286	421.177	311.598	347.159	50.8994	119.792	105.544
ENSG00000185760	KCNQ5	1338.52	-1.74781	0.4859	-3.76055	0.000169538	0.00655935	1926.4	1929.86	2393.12	536.236	1049.24	196.275
ENSG00000128342	LIF	4250.12	-1.74773	0.516206	-3.4951	0.000473877	0.0148271	1473.32	12948.4	5849.53	986.446	3920.84	322.187
ENSG00000102109	PCSK1N	430.629	-1.74733	0.46269	-3.862	0.000112461	0.00477253	619.8	609.55	775.891	105.383	123.19	349.961
ENSG00000175928	LRRN1	810.722	-1.73653	0.487717	-3.57921	0.000344639	0.0115739	2117.85	426.457	1350.7	597.889	245.53	125.912
ENSG00000115884	SDC1	2095.78	-1.73489	0.409117	-4.27805	1.88538e-05	0.00112281	4470.21	2742.97	2579.03	1452.43	850.435	479.577
ENSG00000183421	RIPK4	715.488	-1.73451	0.536061	-3.32433	0.000886308	0.024438	252.865	2068.6	1116.41	174.205	625.295	55.5494
ENSG00000148935	GAS2	1627.28	-1.73342	0.494951	-3.51722	0.000436087	0.0138632	2894.79	990.518	4041.65	431.57	858.931	546.236
ENSG00000138028	CGREF1	144.29	-1.72753	0.521162	-3.30914	0.000935817	0.025448	128.427	214.934	355.696	35.1278	81.5602	49.9945
ENSG00000184040	TMEM236	34.1283	-1.72684	0.729554	-3.83259	0.0001268	0.00518402	54.2424	72.782	51.2202	26.5251	0	0
ENSG00000147251	DOCK11	999.377	-1.7263	0.501331	-3.35914	0.000781851	0.0221021	1360.05	492.416	3124.43	308.981	399.305	311.077
ENSG00000175229	GAL3ST3	102.878	-1.72607	0.545608	-3.17363	0.00150546	0.0366437	185.062	121.682	191.601	53.767	37.3818	27.7747
ENSG00000184292	TACSTD2	114.145	-1.72549	0.584136	-3.17917	0.001477	0.0362971	324.657	57.9982	153.661	123.306	17.8413	7.40659
ENSG00000137877	SPTBN5	242.417	-1.72139	0.558016	-3.15175	0.00162293	0.0384042	199.421	642.529	344.313	98.9313	32.2842	137.022
ENSG00000223532	HLA-B	229.638	-1.72001	0.491046	-3.63914	0.000273552	0.00964687	511.315	195.602	357.593	190.694	26.3371	96.2857
ENSG00000119699	TGFB3	1695.03	-1.7197	0.490379	-3.55115	0.000383545	0.0126896	2789.5	1277.1	4055.88	1158.5	583.665	305.522
ENSG00000148288	GBGT1	325.536	-1.71514	0.487511	-3.52034	0.000430994	0.013823	804.064	386.655	374.666	98.9313	112.995	175.906
ENSG00000001617	SEMA3F	2235.37	-1.71314	0.402753	-4.24531	2.18293e-05	0.00127037	3528.15	2580.35	4459	911.889	921.8	1011
ENSG00000183196	CHST6	847.849	-1.70827	0.510275	-3.39074	0.000697054	0.0202497	1167.81	618.647	2328.62	249.479	511.45	211.088
ENSG00000135046	ANXA1	9352.25	-1.70735	0.489577	-3.52214	0.000428083	0.013823	7549.27	14084.5	23444.6	4616.08	4608.15	1810.91
ENSG00000132000	PODNL1	740.565	-1.70197	0.51546	-3.32282	0.000891126	0.0244936	1713.42	1485.21	404.07	300.378	158.872	381.439
ENSG00000168056	LTBP3	9973.88	-1.69677	0.417398	-4.12182	3.75893e-05	0.00195752	19212.2	11255.1	15690.4	4047.58	2288.78	7349.19
ENSG00000106034	CPED1	255.397	-1.69574	0.529298	-3.34289	0.000829118	0.0231453	537.638	163.76	490.386	250.196	55.2231	35.1813
ENSG00000197594	ENPP1	3433.7	-1.69041	0.429037	-4.00691	6.15192e-05	0.00290768	4068.18	6425.29	5357.25	1272.49	2695.73	783.247
ENSG00000142627	EPHA2	1066.52	-1.68944	0.477491	-3.48689	0.000488664	0.0151752	769.764	1217.96	3217.39	312.566	566.674	314.78
ENSG00000163430	FSTL1	46339.4	-1.68685	0.492241	-3.44145	0.000578598	0.0174027	74506.8	31817.1	117428	24369.4	20870.1	9045.3
ENSG00000118257	NRP2	1251.12	-1.68283	0.455388	-3.69865	0.000216753	0.00796811	2570.93	917.736	2446.24	819.409	446.882	305.522
ENSG00000198768	APCDD1L	560.297	-1.68128	0.49451	-3.26473	0.00109567	0.0288925	394.853	2114.09	303.527	227.972	215.795	105.544
ENSG00000117069	ST6GALNAC5	301.181	-1.67624	0.603071	-3.82974	0.000128279	0.00519689	793.694	313.873	176.425	491.072	4.24793	27.7747
ENSG00000126785	RHOJ	1864.57	-1.67606	0.431532	-3.89214	9.93639e-05	0.00434043	3544.1	1969.66	3271.45	717.61	1005.06	679.555
ENSG00000144152	FBLN7	996.724	-1.67385	0.490543	-3.18711	0.00143701	0.035559	226.542	2904.46	1824.01	205.032	525.893	294.412
ENSG00000116983	HPCAL4	29.9508	-1.67121	0.737776	-3.74699	0.000178968	0.00681757	18.3467	72.782	72.0877	16.4886	0	0
ENSG00000172061	LRRC15	1175.04	-1.67103	0.462392	-3.5201	0.000431392	0.013823	3936.56	1402.19	409.761	476.017	672.022	153.687
ENSG00000148516	ZEB1	1285.46	-1.67084	0.476396	-3.64302	0.000269453	0.00957066	2084.35	1758.14	2099.08	747.72	830.895	192.571
ENSG00000115363	EVA1A	84.0578	-1.67022	0.673066	-3.22957	0.00123976	0.0319157	95.7219	52.3121	264.638	83.8765	5.9471	1.85165
ENSG00000005059	CCDC109B	210.444	-1.66458	0.552731	-3.23998	0.0011954	0.0309522	303.917	332.068	349.056	146.963	112.145	18.5165
ENSG00000171988	JMJD1C	2926.81	-1.6607	0.467857	-3.47746	0.000506188	0.0156193	1971.87	3458.28	8856.35	1109.03	1219.16	946.192
ENSG00000126803	HSPA2	401.449	-1.65686	0.566087	-3.18202	0.00146253	0.0360407	361.35	719.86	824.266	235.858	239.583	27.7747
ENSG00000140859	KIFC3	1310.34	-1.65432	0.401457	-4.12139	3.76586e-05	0.00195752	2177.67	2029.94	1897.04	641.62	586.214	529.571
ENSG00000143333	RGS16	3397.32	-1.65075	0.416711	-3.9482	7.87401e-05	0.00356145	3540.91	7991.24	4481.77	1620.18	1566.64	1183.2
ENSG00000159200	RCAN1	4429.69	-1.65028	0.544982	-3.39919	0.000675866	0.0197304	4833.16	7471.53	8141.16	3630.35	2203.82	298.115
ENSG00000262102	DSEL	1358.22	-1.64784	0.4396	-3.76188	0.000168638	0.00655149	2375.5	1016.67	2953.7	1020.14	350.029	433.285
ENSG00000177119	ANO6	1663.98	-1.64685	0.478787	-3.4934	0.000476905	0.0148958	2720.1	1551.17	3573.08	785.715	987.218	366.626
ENSG00000171680	PLEKHG5	1036.6	-1.64049	0.434232	-3.7463	0.000179463	0.00682187	2718.5	1202.04	1006.38	452.36	488.512	351.813
ENSG00000008405	CRY1	1271.68	-1.63977	0.526355	-3.12849	0.00175706	0.0407154	812.839	1694.46	3653.71	444.474	828.346	196.275
ENSG00000169908	TM4SF1	5685	-1.63861	0.484979	-3.45545	0.000549384	0.0167496	4099.29	10187.2	12240.7	1896.18	4712.65	973.966
ENSG00000162337	LRP5	3415.28	-1.6366	0.422862	-3.87775	0.000105428	0.00453872	5787.19	3569.73	6596.97	1091.83	1753.54	1692.41
ENSG00000261577	JUP	463.304	-1.63546	0.490628	-3.24131	0.00118982	0.0308524	1754.1	376.42	89.1611	448.058	50.9751	61.1044
ENSG00000067057	PFKP	3132.37	-1.63405	0.423836	-3.85198	0.000117165	0.00488662	2816.62	4623.93	7238.17	949.167	1970.19	1196.16
ENSG00000189409	MMP23B	520.178	-1.62428	0.528373	-3.54206	0.000397011	0.0130147	1210.88	595.903	418.298	755.606	34.833	105.544
ENSG00000144749	LRIG1	1962.11	-1.62385	0.426064	-3.82573	0.000130386	0.00527031	2550.19	2483.69	4092.87	678.181	1203.01	764.73
ENSG00000038427	VCAN	5481.39	-1.62303	0.441232	-3.72054	0.000198793	0.00738387	13086	3794.9	8395.37	4758.74	1744.2	1109.14
ENSG00000111145	ELK3	3559.88	-1.62195	0.469153	-3.50897	0.000449851	0.0142249	3976.45	4639.85	8027.34	1551.36	2364.4	799.912
ENSG00000221890	NPTXR	504.752	-1.6213	0.504896	-3.35418	0.000796011	0.0223258	1194.93	421.908	719.928	397.159	235.335	59.2527
ENSG00000041982	TNC	5124.83	-1.618	0.407088	-3.9473	7.90359e-05	0.0035658	13016.6	2959.04	7966.64	3909.22	1242.09	1655.37
ENSG00000205208	C4orf46	176.232	-1.61655	0.528424	-3.09974	0.0019369	0.0432201	300.726	173.995	359.49	109.685	76.4627	37.0329
ENSG00000134775	FHOD3	285.493	-1.61255	0.473435	-3.53471	0.000408225	0.0132848	755.406	214.934	307.321	327.62	48.4264	59.2527
ENSG00000152377	SPOCK1	183.403	-1.61238	0.553095	-3.4049	0.000661881	0.0193855	414.795	115.996	253.255	276.004	14.443	25.9231
ENSG00000189143	CLDN4	460.759	-1.61109	0.631728	-3.42009	0.000625997	0.0184556	142.785	1148.59	902.044	465.981	66.2677	38.8846
ENSG00000157827	FMNL2	940.6	-1.60758	0.442256	-3.62561	0.000288279	0.010079	1833.08	788.093	1787.02	553.442	385.712	296.264
ENSG00000140937	CDH11	6203.14	-1.60208	0.492661	-3.35199	0.000802329	0.0224677	13279	4653.5	11034.2	3342.87	3852.02	1057.29
ENSG00000146674	IGFBP3	3700.12	-1.59994	0.442083	-3.74201	0.000182555	0.00689901	6107.86	5920.36	4602.23	3127.81	1803.67	638.818
ENSG00000197077	KIAA1671	831.969	-1.59826	0.481181	-3.36311	0.000770687	0.0218904	1450.19	692.567	1741.49	589.287	342.383	175.906
ENSG00000132003	ZSWIM4	261.99	-1.59677	0.486224	-3.25476	0.00113487	0.0296427	308.703	271.795	664.914	124.739	103.649	98.1373
ENSG00000028277	POU2F2	160.58	-1.59154	0.501071	-3.17492	0.00149878	0.036581	94.9243	75.0565	584.289	32.9771	16.9917	159.242
ENSG00000128045	RASL11B	431.323	-1.59056	0.496395	-3.16939	0.00152759	0.037031	1342.5	212.66	513.15	279.588	162.271	77.7692
ENSG00000215788	TNFRSF25	619.222	-1.5874	0.510898	-3.1803	0.00147122	0.036205	1675.13	759.662	483.746	200.013	148.677	448.099
ENSG00000197093	GAL3ST4	233.655	-1.5851	0.494198	-3.06488	0.00217759	0.0472147	761.787	299.089	75.8818	136.927	87.5073	40.7362
ENSG00000117724	CENPF	576.072	-1.58164	0.426784	-3.74152	0.000182908	0.00689901	1345.69	836.993	442.96	493.94	218.343	118.505
ENSG00000148841	ITPRIP	1588.7	-1.58011	0.450261	-3.57179	0.000354545	0.0118398	2592.47	1971.94	2713.72	957.77	937.093	359.22
ENSG00000112759	SLC29A1	2847.76	-1.57972	0.396082	-3.97994	6.89325e-05	0.00318441	3242.58	4208.85	5696.82	1146.31	1303.26	1488.72
ENSG00000147394	ZNF185	1061.54	-1.5796	0.470404	-3.30272	0.000957523	0.0259199	1845.84	635.706	2584.72	472.433	452.829	377.736
ENSG00000118292	C1orf54	171.718	-1.57951	0.533686	-3.12332	0.00178823	0.0409596	252.865	271.795	257.998	162.735	44.1784	40.7362
ENSG00000139200	PIANP	205.064	-1.57882	0.513325	-3.19792	0.00138424	0.0345885	316.68	329.794	292.145	91.7624	164.82	35.1813
ENSG00000162636	FAM102B	512.538	-1.56824	0.51391	-3.09986	0.00193612	0.0432201	698.77	474.22	1241.62	301.812	262.522	96.2857
ENSG00000198517	MAFK	4172.79	-1.56774	0.484984	-3.18894	0.00142796	0.0353841	1902.47	8529.14	9346.73	1359.23	2986.29	912.862
ENSG00000156466	GDF6	177.452	-1.55979	0.528216	-3.06227	0.00219668	0.0475131	558.378	181.955	65.448	210.767	20.3901	27.7747
ENSG00000164930	FZD6	301.406	-1.55941	0.49497	-3.21211	0.00131766	0.0334868	555.187	260.423	569.113	256.648	98.5519	68.5109
ENSG00000128203	ASPHD2	274.693	-1.54485	0.457346	-3.36903	0.000754334	0.0215631	236.912	262.698	772.097	63.8035	96.0032	216.643
ENSG00000122966	CIT	612.942	-1.54343	0.503275	-3.11555	0.00183599	0.0418391	1528.36	642.529	687.678	140.511	237.884	440.692
ENSG00000100285	NEFH	137.597	-1.5421	0.508736	-3.05468	0.00225303	0.0483224	313.489	200.151	123.308	101.082	56.0726	31.478
ENSG00000115461	IGFBP5	3818.6	-1.53108	0.506453	-3.57049	0.000356319	0.0118547	7175.95	3064.81	4975	6719.44	478.317	498.093
ENSG00000179388	EGR3	546.97	-1.52656	0.562178	-3.07643	0.00209497	0.0459813	746.631	584.531	1122.1	600.757	185.21	42.5879
ENSG00000250588	IQCJ-SCHIP1	679.739	-1.52644	0.452294	-3.29694	0.000977458	0.0262211	323.859	1208.86	1668.45	168.47	427.341	281.45
ENSG00000074590	NUAK1	1436.88	-1.52338	0.443753	-3.43037	0.000602757	0.0179135	2849.32	1198.63	2587.57	835.898	701.758	448.099
ENSG00000136235	GPNMB	1522.21	-1.51214	0.490553	-3.12583	0.00177306	0.0408214	1580.21	1414.7	4068.21	1191.48	463.874	414.769
ENSG00000112773	FAM46A	1702.96	-1.5119	0.406993	-3.69788	0.000217407	0.00797577	3184.35	1409.01	3207.9	1063.15	570.072	783.247
ENSG00000106333	PCOLCE	7825.58	-1.50869	0.395347	-3.83189	0.000127162	0.00518692	14512.2	10116.7	10687	5097.11	2513.07	4027.33
ENSG00000111674	ENO2	1498.85	-1.50211	0.413085	-3.66176	0.000250488	0.00896839	1335.32	3085.28	2312.5	455.944	1283.72	520.313
ENSG00000144485	HES6	309.879	-1.49521	0.486881	-3.1302	0.00174686	0.0405545	446.702	417.359	544.452	219.369	155.474	75.9175
ENSG00000115963	RND3	1567.87	-1.49484	0.447926	-3.33018	0.000867891	0.0240759	2353.16	1183.85	3676.47	1144.88	506.353	542.533
ENSG00000143061	IGSF3	1172.59	-1.49199	0.454393	-3.38704	0.000706499	0.0204245	2368.32	1369.21	1488.23	916.907	687.315	205.533
ENSG00000178026	FAM211B	502.508	-1.48986	0.474572	-3.13958	0.00169192	0.0395135	1458.16	495.828	382.254	303.963	104.499	270.34
ENSG00000148344	PTGES	361.708	-1.48352	0.614054	-3.15411	0.00160988	0.0381968	513.708	740.33	367.078	228.689	318.595	1.85165
ENSG00000169122	FAM110B	378.043	-1.47895	0.474533	-3.12733	0.001764	0.0407802	377.304	584.531	771.148	175.639	242.981	116.654
ENSG00000119669	IRF2BPL	2240.09	-1.47837	0.4976	-3.10224	0.00192062	0.0430536	3158.82	2539.41	4415.37	1425.18	1546.25	355.516
ENSG00000063180	CA11	231.08	-1.47217	0.470312	-3.14646	0.00165263	0.0390037	381.292	307.049	359.49	145.529	76.4627	116.654
ENSG00000140416	TPM1	8696.7	-1.46637	0.436544	-3.44348	0.000574269	0.0173602	14793	9481	13997.3	8436.4	3209.73	2262.71
ENSG00000231479	SLC44A4	25.987	-1.46592	0.730404	-3.0935	0.00197812	0.0438075	41.4795	54.5865	33.1983	25.8082	0.849585	0
ENSG00000106799	TGFBR1	3213.46	-1.45614	0.472131	-3.19889	0.00137956	0.0345199	4202.19	4560.25	5539.37	2192.26	2197.88	588.824
ENSG00000038295	TLL1	51.7879	-1.45581	0.695339	-3.19322	0.00140696	0.0351072	106.889	36.391	91.0581	73.84	2.54876	0
ENSG00000138623	SEMA7A	1964.31	-1.44769	0.40735	-3.54929	0.000386272	0.0127327	1754.1	4805.89	2307.75	799.336	1511.41	607.34
ENSG00000135842	FAM129A	858.62	-1.44619	0.442401	-3.20019	0.00137336	0.034413	1029.01	573.159	2401.66	355.579	321.993	470.318
ENSG00000166272	WBP1L	1378.34	-1.44455	0.402453	-3.59112	0.000329261	0.0112049	2629.96	1164.51	2388.38	794.318	387.411	905.455
ENSG00000104313	EYA1	361.336	-1.44378	0.46272	-3.09578	0.00196298	0.0436745	446.702	367.322	846.082	161.301	181.811	164.797
ENSG00000155893	ACPL2	1222.56	-1.43935	0.474971	-3.16418	0.00155523	0.037447	1341.7	2200.52	1836.34	649.506	1103.61	203.681
ENSG00000172985	SH3RF3	418.794	-1.43872	0.433922	-3.30596	0.000946531	0.0256612	1082.46	347.989	464.776	335.506	117.243	164.797
ENSG00000008441	NFIX	4238.81	-1.43868	0.421247	-3.44084	0.000579908	0.0174128	6531.43	5314.23	7102.53	2575.08	2550.46	1359.11
ENSG00000197183	C20orf112	1476.49	-1.43818	0.402135	-3.58117	0.000342058	0.0115306	1971.07	1962.84	2672.93	572.798	744.237	935.082
ENSG00000082781	ITGB5	4216.71	-1.43329	0.444952	-3.26471	0.00109576	0.0288925	5751.29	5236.89	7885.06	2413.06	2841.86	1172.09
ENSG00000165804	ZNF219	507.776	-1.43311	0.425826	-3.36758	0.000758302	0.0216419	970.78	600.452	708.546	319.735	186.059	261.082
ENSG00000261149	TMEM130	709.196	-1.43207	0.452533	-3.16767	0.00153663	0.0370993	1675.13	823.347	723.722	342.675	231.087	459.208
ENSG00000135723	FHOD1	1022.75	-1.43181	0.456524	-3.10766	0.00188575	0.0425927	715.521	1870.73	2109.51	478.168	601.507	361.071
ENSG00000175264	CHST1	1079.45	-1.43023	0.405997	-3.50306	0.000459944	0.0144944	555.187	2264.2	2046.91	210.05	737.44	662.89
ENSG00000146242	TPBG	1282.86	-1.42781	0.461761	-3.0673	0.00215999	0.0469639	1316.97	1246.39	3353.97	530.501	769.724	479.577
ENSG00000126603	GLIS2	1573.67	-1.42416	0.403821	-3.51886	0.000433399	0.013827	2058.02	1903.71	3109.25	715.46	781.619	873.977
ENSG00000161791	FMNL3	1832.41	-1.41829	0.402387	-3.51989	0.000431727	0.013823	3747.51	1843.43	2620.77	1050.97	644.835	1086.92
ENSG00000183114	FAM43B	360.531	-1.41769	0.44575	-3.2085	0.00133429	0.0337655	469.037	408.262	721.825	123.306	133.385	307.373
ENSG00000180581	SRP9P1	43.2669	-1.41699	0.700053	-3.05746	0.00223222	0.0479913	75.7799	100.075	23.713	56.6346	3.39834	0
ENSG00000054392	HHAT	258.851	-1.41424	0.458208	-3.0934	0.00197876	0.0438075	314.287	517.435	330.086	106.1	185.21	99.9889
ENSG00000090006	LTBP4	7923.09	-1.40885	0.425632	-3.32388	0.000887756	0.0244386	15794.1	10360.1	9294.57	3147.16	3485.85	5456.8
ENSG00000143387	CTSK	1360.21	-1.40734	0.434378	-3.23544	0.00121456	0.0313574	2736.85	1332.82	2065.88	586.419	798.61	640.67
ENSG00000182179	UBA7	1022.73	-1.40327	0.423444	-3.25814	0.00112146	0.0293784	2950.63	955.264	796.758	683.916	383.163	366.626
ENSG00000006327	TNFRSF12A	2411.91	-1.40295	0.443935	-3.10256	0.00191853	0.0430536	1336.12	5433.63	4306.29	965.656	1542.85	886.939
ENSG00000176887	SOX11	993.294	-1.39509	0.42205	-3.35538	0.000792565	0.0223258	1961.5	1327.13	1063.29	830.88	534.389	242.566
ENSG00000229215	HLA-A	359.357	-1.39076	0.555057	-3.45097	0.000558575	0.0169719	800.874	117.134	421.144	764.209	10.195	42.5879
ENSG00000121440	PDZRN3	609.171	-1.38874	0.471847	-3.06564	0.00217202	0.0471511	919.728	849.503	869.795	611.51	269.319	135.17
ENSG00000143341	HMCN1	1867.08	-1.38564	0.442636	-3.15656	0.0015964	0.0380961	3603.13	2015.15	2695.7	721.912	1370.38	796.208
ENSG00000138162	TACC2	693.048	-1.37673	0.430786	-3.18622	0.00144144	0.0356192	825.602	868.836	1410.45	351.995	375.517	325.89
ENSG00000153162	BMP6	388.19	-1.37515	0.452321	-3.0672	0.00216077	0.0469639	767.371	470.809	483.746	258.082	236.185	112.95
ENSG00000087245	MMP2	21619.4	-1.37309	0.418093	-3.28608	0.00101593	0.0270905	42069	21918.8	32366.4	10773.5	13573	9015.67
ENSG00000122877	EGR2	1134.96	-1.37176	0.533149	-3.0862	0.00202734	0.0447165	2562.16	1075.81	1028.2	1637.38	456.227	49.9945
ENSG00000148677	ANKRD1	274.429	-1.37097	0.552623	-3.11952	0.00181149	0.0413843	520.887	264.972	275.071	521.182	34.833	29.6264
ENSG00000141068	KSR1	588.466	-1.3703	0.422107	-3.23609	0.0012118	0.0313315	1208.49	566.335	847.979	399.31	232.786	275.895
ENSG00000157554	ERG	2861.25	-1.36609	0.448238	-3.09498	0.00196827	0.0437378	3990.01	3420.76	5212.13	2034.54	1721.26	788.802
ENSG00000156113	KCNMA1	4044.58	-1.36021	0.423761	-3.31635	0.00091203	0.024953	3146.06	5711.12	8520.57	624.414	3071.25	3194.09
ENSG00000166965	RCCD1	461.298	-1.35905	0.428406	-3.17247	0.0015115	0.0367407	769.764	581.119	692.421	281.022	206.449	237.011
ENSG00000177283	FZD8	2071.95	-1.35496	0.406912	-3.35599	0.000790815	0.0223202	3591.97	2814.62	2640.68	1619.46	1068.78	696.219
ENSG00000185340	GAS2L1	568.737	-1.35352	0.430369	-3.1523	0.00161989	0.0383831	634.956	885.894	990.257	268.118	227.689	405.511
ENSG00000069535	MAOB	522.362	-1.34915	0.436123	-3.10081	0.00192992	0.0432079	450.691	1131.53	724.671	205.032	442.634	179.61
ENSG00000071282	LMCD1	1072.42	-1.34869	0.441019	-3.08157	0.00205915	0.0453064	1225.24	1619.4	1890.4	655.958	689.863	353.665
ENSG00000166147	FBN1	23438.5	-1.3356	0.41224	-3.24186	0.00118751	0.0308372	46010.3	21540.1	35846.5	16679.2	12105.7	8449.07
ENSG00000144642	RBMS3	948.989	-1.33327	0.42874	-3.08518	0.00203428	0.0448143	1008.27	1055.34	2184.45	440.89	510.601	494.39
ENSG00000109089	CDR2L	899.74	-1.32984	0.428883	-3.12642	0.00176951	0.0407923	1100.8	1332.82	1494.87	389.273	719.599	361.071
ENSG00000146648	EGFR	1086.72	-1.32442	0.417567	-3.16819	0.00153392	0.0370839	1839.46	1047.38	1900.84	765.642	480.016	486.983
ENSG00000167123	CERCAM	2958.56	-1.32024	0.39666	-3.32977	0.000869192	0.0240759	5081.24	3749.41	4121.33	1796.54	1677.08	1325.78
ENSG00000071246	VASH1	1401.79	-1.30581	0.412729	-3.15442	0.00160816	0.0381968	2949.83	1615.99	1608.69	828.729	585.364	822.131
ENSG00000035862	TIMP2	8587.96	-1.29696	0.403985	-3.2101	0.00132689	0.0336736	13889.3	9034.07	14609.1	5720.81	4493.46	3781.06
ENSG00000185567	AHNAK2	3012.71	-1.29494	0.401016	-3.221	0.00127744	0.032757	3268.11	5526.89	4403.04	1604.41	1670.29	1603.53
ENSG00000273003	RP11-399J13.3	20.6996	-1.25329	0.728625	-3.07036	0.002138	0.0466393	50.254	0	65.448	0	8.49585	0
ENSG00000050165	DKK3	3455.21	-1.23082	0.396391	-3.09718	0.00195371	0.0435225	4853.1	3349.11	6718.38	2219.5	1424.75	2166.43
ENSG00000116774	OLFML3	3192.65	-1.22058	0.398204	-3.10296	0.00191594	0.0430536	7530.13	3442.36	2415.89	3718.53	1143.54	905.455
ENSG00000171724	VAT1L	101.568	-1.21588	0.670534	-3.04363	0.00233743	0.0496714	295.143	114.859	2.84557	195.712	0.849585	0
ENSG00000072110	ACTN1	6659.26	-1.20896	0.399455	-3.04537	0.00232394	0.0495459	12223.7	7829.75	8208.51	5457.71	3832.48	2403.44
ENSG00000245112	SMARCA5-AS1	26.0347	-1.19732	0.739454	-3.448	0.000564745	0.0171012	43.8726	22.7444	60.7054	0	28.8859	0
ENSG00000242384	TBC1D3H	31.978	-1.111	0.736478	-3.53924	0.000401275	0.0131304	33.5027	59.1354	54.0657	45.1643	0	0
ENSG00000136738	STAM	50.6066	-1.01785	0.732571	-4.07542	4.59317e-05	0.00230439	32.705	84.1542	104.337	82.4428	0	0
ENSG00000102854	MSLN	25.6404	-1.00322	0.739273	-3.18988	0.00142332	0.0353181	24.7282	26.156	66.3965	36.5616	0	0
ENSG00000170290	SLN	81.2873	-0.469205	0.699599	-3.11396	0.00184598	0.042013	137.201	65.9587	22.7645	260.949	0.849585	0
ENSG00000230624	DDX39B	320.642	-0.432004	0.599319	-3.20191	0.00136519	0.0342712	431.546	565.198	596.62	330.488	0	0
ENSG00000101443	WFDC2	129.719	0.972292	0.656713	3.09186	0.00198907	0.0439268	13.5606	321.833	1.89704	131.908	186.909	122.209
ENSG00000230034	PSMB8	35.8273	1.01874	0.733806	3.1618	0.00156797	0.0376071	2.39305	50.0376	0	101.799	14.443	46.2912
ENSG00000259006	RP11-566K11.4	41.7409	1.1178	0.732026	3.94617	7.94106e-05	0.00357368	0	63.6843	0	29.3926	51.8247	105.544
ENSG00000232541	COL11A2	4393.36	1.13125	0.677968	3.58616	0.000335579	0.011355	0	250.188	52.1687	441.606	159.722	25456.4
ENSG00000255831	AL139385.1	70.2069	1.17978	0.696811	3.46238	0.000535412	0.0164359	0	112.585	6.63965	30.8264	73.0643	198.126
ENSG00000160360	GPSM1	3030.92	1.2	0.392018	3.06051	0.00220958	0.0476767	1286.66	2081.11	1884.71	3122.79	5053.33	4756.88
ENSG00000100994	PYGB	5531.9	1.22468	0.394273	3.09418	0.00197359	0.0438015	1892.9	3642.51	3759.94	4337.92	11296.1	8262.05
ENSG00000153048	CARHSP1	2784.98	1.25656	0.398161	3.13986	0.00169028	0.0395135	986.734	1531.83	2031.73	2416.65	3326.98	6415.96
ENSG00000138796	HADH	1640.17	1.25997	0.406761	3.11285	0.00185292	0.0421174	668.458	1214.55	904.89	2263.23	2510.53	2279.38
ENSG00000163754	GYG1	989.31	1.26611	0.407941	3.10774	0.00188524	0.0425927	532.852	456.025	665.862	1302.6	1360.19	1618.34
ENSG00000102760	RGCC	3039.87	1.26888	0.430177	3.07259	0.00212209	0.0464055	472.228	3043.2	2002.33	2159.28	4679.52	5882.68
ENSG00000130821	SLC6A8	3147.84	1.27493	0.398926	3.22082	0.00127823	0.032757	1092.83	1587.56	2718.46	3457.58	4412.75	5617.9
ENSG00000184205	TSPYL2	4169.92	1.28874	0.406847	3.19194	0.00141318	0.0351815	1397.54	2536	3085.54	5469.18	5156.13	7375.11
ENSG00000137267	TUBB2A	7001.68	1.29229	0.425315	3.13355	0.00172705	0.0401765	1433.44	7928.69	3218.33	5173.1	11772.7	12483.8
ENSG00000010810	FYN	754.179	1.29879	0.415258	3.11225	0.00185669	0.0421457	273.605	483.318	450.548	619.396	1337.25	1360.96
ENSG00000131069	ACSS2	1386.91	1.29889	0.426861	3.06894	0.00214819	0.0468044	988.329	817.661	491.334	1776.46	2073.84	2173.83
ENSG00000244721	HLA-L	20.2762	1.29993	0.740247	3.30152	0.000961639	0.0259526	0	20.4699	0	39.4291	33.9834	27.7747
ENSG00000104812	GYS1	1516.32	1.30511	0.418965	3.11915	0.00181372	0.0413843	917.335	893.854	642.149	1699.75	2372.89	2571.94
ENSG00000156110	ADK	795.977	1.30788	0.411737	3.17515	0.00149761	0.036581	335.027	418.497	537.812	850.236	1234.45	1399.85
ENSG00000157869	RAB28	551.421	1.31144	0.429781	3.04996	0.00228869	0.0488528	246.484	326.382	311.115	815.108	976.174	633.263
ENSG00000235030	IER3	24.9586	1.32167	0.738994	3.05633	0.00224067	0.0481151	27.9189	0	0	73.1231	24.638	24.0714
ENSG00000109107	ALDOC	1429.82	1.32408	0.437167	3.0525	0.00226943	0.0485996	399.639	1381.72	556.782	974.258	2409.42	2857.09
ENSG00000117289	TXNIP	2587.6	1.33489	0.4076	3.30187	0.000960432	0.0259526	1661.57	809.7	1785.12	3474.78	3157.91	4636.52
ENSG00000182168	UNC5C	1592.32	1.33933	0.401008	3.34362	0.000826933	0.0231205	1069.69	1233.88	260.844	3266.88	2993.09	729.549
ENSG00000115325	DOK1	1900.5	1.34605	0.397516	3.38747	0.000705394	0.0204245	1130.32	1067.85	845.133	2792.3	3141.77	2425.66
ENSG00000188763	FZD9	1613.7	1.34885	0.440936	3.21431	0.00130759	0.0333258	248.079	2049.27	650.686	1078.21	3052.56	2603.42
ENSG00000260735	RP11-72I8.1	994.345	1.35059	0.425205	3.16958	0.00152659	0.037031	532.054	573.159	439.166	997.916	1649.89	1773.88
ENSG00000134324	LPIN1	2015.58	1.35177	0.412816	3.25082	0.00115072	0.0300127	904.572	1000.75	1180.91	1673.23	3584.4	3749.59
ENSG00000123989	CHPF	14826.2	1.35755	0.406483	3.31782	0.000907237	0.02486	5803.94	9634.52	7268.52	11930.5	23704.3	30615.1
ENSG00000129757	CDKN1C	9162.34	1.38373	0.436789	3.2095	0.00132965	0.0336957	2831.77	8497.3	3289.47	7739.58	13742	18873.8
ENSG00000162493	PDPN	4885.15	1.38944	0.438003	3.14804	0.00164369	0.0388442	2473.61	2041.31	2604.64	7092.23	11103.2	3995.85
ENSG00000070759	TESK2	387.071	1.39333	0.4386	3.20407	0.00135499	0.0341561	94.1266	189.916	327.24	316.15	580.267	814.725
ENSG00000170608	FOXA3	518.944	1.39354	0.551082	3.15979	0.00157884	0.0377611	15.9537	789.23	181.168	387.123	1242.09	498.093
ENSG00000105357	MYH14	1368.15	1.3965	0.461905	3.1918	0.00141388	0.0351815	200.218	1379.45	766.406	1528.42	2582.74	1751.66
ENSG00000153976	HS3ST3A1	533.591	1.3971	0.452346	3.06065	0.00220857	0.0476767	172.299	332.068	263.689	438.739	633.791	1360.96
ENSG00000151726	ACSL1	1589.4	1.39917	0.428367	3.26916	0.00107869	0.0285509	780.134	658.45	973.183	2908.44	2599.73	1616.49
ENSG00000119986	AVPI1	840.247	1.4068	0.441995	3.2974	0.000975852	0.0262174	134.011	657.313	605.157	751.304	1397.57	1496.13
ENSG00000231617	DAXX	53.1381	1.40866	0.721099	3.64385	0.000268592	0.0095591	0	0	62.6024	157	8.49585	90.7307
ENSG00000169071	ROR2	1144.23	1.41119	0.411023	3.45946	0.000541264	0.016587	650.909	841.542	312.064	1605.12	2263.3	1192.46
ENSG00000056998	GYG2	2011.82	1.42094	0.402241	3.55164	0.000382844	0.0126896	650.111	1324.86	1172.37	2439.59	3430.63	3053.37
ENSG00000124159	MATN4	30201.1	1.42255	0.48565	3.32431	0.000886366	0.024438	2010.16	35907.7	17247	21999.3	50170.6	53871.8
ENSG00000095739	BAMBI	3000.36	1.4278	0.444701	3.27883	0.00104237	0.027751	835.972	1424.94	2461.41	4471.27	5227.5	3581.09
ENSG00000249915	PDCD6	2421.74	1.43535	0.398129	3.59456	0.000324936	0.0110788	950.838	1449.95	1228.34	2329.19	4365.17	4206.94
ENSG00000152465	NMT2	841.466	1.44237	0.447253	3.16176	0.00156819	0.0376071	285.57	412.811	423.041	652.373	841.939	2433.06
ENSG00000102313	ITIH6	2032.26	1.44262	0.546432	3.12491	0.00177862	0.0408901	74.9822	2164.13	1069.93	1959.99	5361.73	1562.79
ENSG00000169764	UGP2	4687.3	1.44969	0.395812	3.66182	0.000250434	0.00896839	2089.13	3105.75	1872.38	7836.36	8342.93	4877.24
ENSG00000198682	PAPSS2	16070	1.45146	0.50213	3.06263	0.00219399	0.0475126	2135.4	10210	11701.9	21532.6	39346.9	11493.2
ENSG00000163710	PCOLCE2	1227.7	1.45254	0.461101	3.25868	0.0011193	0.0293784	279.987	1137.22	544.452	1927.73	1780.73	1696.11
ENSG00000142207	URB1	1324.18	1.4555	0.404333	3.60727	0.000309432	0.0106724	749.822	500.376	754.075	2116.99	1751.85	2071.99
ENSG00000141542	RAB40B	559.723	1.45818	0.434064	3.35441	0.000795348	0.0223258	300.726	341.166	171.682	637.318	1307.51	599.934
ENSG00000100427	MLC1	420.061	1.45859	0.460382	3.25858	0.00111973	0.0293784	275.201	307.049	76.8303	770.661	649.933	440.692
ENSG00000162496	DHRS3	1478.45	1.4625	0.406884	3.63841	0.000274329	0.00964794	262.438	773.309	1264.38	1040.93	2015.22	3514.43
ENSG00000179604	CDC42EP4	629.739	1.46741	0.441716	3.35937	0.000781195	0.0221021	203.409	275.207	475.209	815.825	1127.4	881.384
ENSG00000109576	AADAT	245.378	1.47215	0.475529	3.13004	0.00174784	0.0405545	157.144	135.329	70.1906	382.821	371.269	355.516
ENSG00000167996	FTH1	32887	1.48527	0.394217	3.76296	0.000167913	0.00655007	17410.2	14465.4	16289	42879.6	42218.5	64059.6
ENSG00000211448	DIO2	383.942	1.4944	0.523245	3.07302	0.00211907	0.0463962	74.9822	396.89	121.411	501.109	411.199	798.06
ENSG00000260630	SNAI3-AS1	261.684	1.4964	0.531242	3.12702	0.00176586	0.0407802	259.247	141.015	20.8675	429.419	462.174	257.379
ENSG00000065882	TBC1D1	3963.8	1.50535	0.4125	3.62227	0.000292028	0.0101703	1226.04	2213.03	2037.43	3267.6	5100.91	9937.79
ENSG00000164687	FABP5	1099.77	1.51079	0.420551	3.55539	0.000377412	0.0125332	595.869	599.315	307.321	2771.51	1548.79	775.84
ENSG00000073331	ALPK1	230.007	1.51107	0.479968	3.18452	0.00144993	0.0357797	151.56	117.134	63.551	370.634	356.826	320.335
ENSG00000105227	PRX	1096.76	1.5111	0.438143	3.51408	0.000441273	0.0140032	231.328	624.333	796.758	1363.53	1318.56	2246.05
ENSG00000206052	DOK6	425.634	1.51327	0.477738	3.17442	0.00150139	0.0365945	276.796	130.78	176.425	594.305	962.58	412.917
ENSG00000159307	SCUBE1	887.253	1.51445	0.466713	3.30609	0.000946081	0.0256612	620.597	200.151	468.57	1484.69	1601.47	948.043
ENSG00000160678	S100A1	6318.57	1.51568	0.603989	3.50303	0.000459999	0.0144944	86.1497	8109.51	2293.53	7758.94	9020.05	10643.3
ENSG00000073910	FRY	1087.46	1.51761	0.521675	3.31481	0.00091704	0.0250135	69.3984	1286.2	474.261	1246.68	2213.17	1235.05
ENSG00000162998	FRZB	1879.84	1.52177	0.406483	3.78368	0.000154524	0.0061078	1991.81	444.653	445.805	5185.29	1900.52	1310.97
ENSG00000230930	COL11A2	17047.5	1.52243	0.546034	3.21489	0.00130494	0.0333057	944.456	18197.8	7842.38	27543.1	29462.8	18294.3
ENSG00000198756	COLGALT2	2091.8	1.52429	0.436768	3.60101	0.000316979	0.0108531	343.004	1933.27	1001.64	2261.8	4552.08	2458.99
ENSG00000131149	GSE1	933.205	1.52438	0.428391	3.60091	0.000317102	0.0108531	682.019	262.698	444.857	1519.81	1306.66	1383.18
ENSG00000164066	INTU	436.356	1.53073	0.442864	3.44208	0.000577262	0.0173918	177.086	224.032	199.19	462.396	618.498	936.933
ENSG00000182118	FAM89A	594.538	1.53909	0.444905	3.49674	0.000470976	0.0147622	335.027	360.499	164.094	924.793	849.585	933.23
ENSG00000114790	ARHGEF26	346.772	1.54074	0.487875	3.19063	0.00141964	0.0352757	262.438	113.722	101.492	506.844	320.294	775.84
ENSG00000172349	IL16	768.73	1.54179	0.510256	3.436	0.000590373	0.0176087	63.8146	1036.01	233.336	516.163	1161.38	1601.67
ENSG00000198373	WWP2	28691.9	1.54206	0.413679	3.74341	0.000181543	0.0068863	6814.6	19963.9	14059.9	24007.3	39629.8	67675.9
ENSG00000165238	WNK2	419.633	1.54518	0.482738	3.26453	0.00109645	0.0288925	310.299	202.425	79.6758	934.829	372.118	618.45
ENSG00000260789	GPSM1	2248.25	1.54767	0.49372	3.07803	0.00208376	0.0457914	708.342	1275.96	657.326	1848.15	1787.53	7212.17
ENSG00000132031	MATN3	34729.2	1.55699	0.487442	3.31926	0.000902549	0.0247695	4642.51	31707.9	13901.5	57130	77238.4	23754.8
ENSG00000167995	BEST1	281.2	1.56013	0.454614	3.43611	0.000590132	0.0176087	168.311	111.447	110.029	506.844	351.728	438.84
ENSG00000124006	OBSL1	13086.6	1.56332	0.449538	3.50225	0.000461354	0.0145115	5100.38	9486.68	3477.28	11440.9	20949.1	28065.4
ENSG00000111077	TENC1	9563.63	1.5642	0.412403	3.79716	0.000146364	0.00581099	4510.1	5305.13	3524.71	11928.4	13243.3	18870.1
ENSG00000100767	PAPLN	255.725	1.56678	0.463431	3.38965	0.000699823	0.0202971	174.693	96.6636	81.5729	542.688	279.514	359.22
ENSG00000112280	COL9A1	90161.5	1.56811	0.430638	3.77279	0.000161429	0.00632476	12724.6	68350.3	58063.8	88515.6	175959	137355
ENSG00000198467	TPM2	13521	1.56881	0.426243	3.6713	0.000241319	0.00869235	5146.65	7905.95	5126.76	13751.5	17324.7	31870.6
ENSG00000134602	MST4	13250.4	1.56918	0.45626	3.52386	0.000425312	0.0137656	2232.71	8766.82	7725.71	16585.3	32487.3	11704.3
ENSG00000137941	TTLL7	260.125	1.57607	0.478227	3.29372	0.000988694	0.0264146	78.1729	143.29	123.308	389.99	576.019	249.972
ENSG00000100504	PYGL	3003.99	1.58077	0.406369	3.92508	8.67001e-05	0.00383412	1021.03	2321.06	1043.37	3967.29	5395.72	4275.45
ENSG00000262664	OVCA2	138.417	1.58183	0.647307	3.14586	0.001656	0.0390317	65.41	0	114.771	164.886	141.031	344.406
ENSG00000116704	SLC35D1	1837.67	1.58264	0.469653	3.3406	0.000835961	0.0233	522.482	838.131	913.427	2587.27	5007.46	1157.28
ENSG00000092445	TYRO3	981.693	1.58613	0.410127	3.8603	0.000113248	0.00479454	447.5	411.673	487.54	1436.65	1179.22	1927.56
ENSG00000091409	ITGA6	153.728	1.58799	0.503368	3.15613	0.00159877	0.0380961	76.5775	71.6448	53.1172	277.438	184.36	259.231
ENSG00000006534	ALDH3B1	316.496	1.59602	0.505106	3.25835	0.0011206	0.0293784	244.889	139.878	52.1687	630.866	301.603	529.571
ENSG00000165795	NDRG2	6847.32	1.59636	0.397316	4.03072	5.56059e-05	0.00266342	1644.02	4414.69	3551.27	5954.52	11152.5	14366.9
ENSG00000121104	FAM117A	269.322	1.59668	0.460514	3.45717	0.00054589	0.0166913	113.271	119.408	123.308	340.524	360.224	559.197
ENSG00000154743	TSEN2	268.559	1.61058	0.51466	3.14315	0.0016714	0.0392394	101.306	161.485	69.2421	288.908	301.603	688.813
ENSG00000141524	TMC6	531.417	1.6109	0.455784	3.59664	0.000322349	0.0110116	165.918	413.948	172.631	876.761	792.663	766.582
ENSG00000157110	RBPMS	415.035	1.61975	0.46527	3.51316	0.000442809	0.014027	285.57	160.348	113.823	708.291	442.634	779.543
ENSG00000049089	COL9A2	99003.8	1.62131	0.430255	3.83634	0.000124879	0.00512896	24312.6	75855.9	40979	126694	133926	192255
ENSG00000071991	CDH19	322.045	1.62136	0.584005	3.13715	0.00170597	0.0397897	14.3583	247.914	160.3	539.821	716.201	253.676
ENSG00000054938	CHRDL2	121.929	1.6261	0.654063	3.29917	0.000969723	0.026092	35.098	128.506	0	153.415	301.603	112.95
ENSG00000095637	SORBS1	2062.32	1.63207	0.455858	3.52011	0.000431367	0.013823	634.158	1066.71	773.994	3589.49	5178.22	1131.36
ENSG00000070371	CLTCL1	386.246	1.63301	0.507678	3.20775	0.00133776	0.0338053	212.981	152.387	93.9037	474.584	335.586	1048.03
ENSG00000116661	FBXO2	4534.42	1.63496	0.445213	3.77613	0.000159282	0.00626812	477.014	3829.02	2031.73	2269.69	6343.01	12256.1
ENSG00000110721	CHKA	906.879	1.64054	0.421032	3.86605	0.000110612	0.00473775	451.488	287.716	423.041	1616.6	714.501	1947.93
ENSG00000168079	SCARA5	59.7691	1.65303	0.699458	3.1618	0.00156797	0.0376071	0	50.0376	12.3308	116.854	84.9585	94.434
ENSG00000170006	TMEM154	186.519	1.65321	0.502242	3.40527	0.000660985	0.0193855	33.5027	170.583	58.8084	214.351	399.305	242.566
ENSG00000137285	TUBB2B	7783.51	1.65535	0.429747	3.95343	7.70396e-05	0.00349337	1201.31	7236.13	2922.4	5589.62	13677.5	16074.1
ENSG00000074410	CA12	779.671	1.65644	0.418081	3.99102	6.57887e-05	0.00307691	246.484	601.589	230.491	914.756	1694.07	990.631
ENSG00000136960	ENPP2	1308.31	1.65761	0.487277	3.52038	0.000430934	0.013823	898.989	191.053	664.914	2637.45	2244.6	1212.83
ENSG00000223745	RP4-717I23.3	553.491	1.65962	0.490967	3.39148	0.000695164	0.0202277	122.045	396.89	157.455	376.369	712.802	1555.38
ENSG00000119711	ALDH6A1	1917.71	1.66893	0.401334	4.14945	3.33281e-05	0.00180985	677.233	954.127	878.331	2038.13	3168.1	3790.32
ENSG00000164989	CCDC171	98.1036	1.67317	0.560815	3.12688	0.0017667	0.0407802	12.7629	75.0565	39.8379	106.1	182.661	172.203
ENSG00000126218	F10	193.681	1.68095	0.574919	3.37379	0.000741399	0.0212273	191.444	64.8215	3.79409	627.282	146.978	127.764
ENSG00000166436	TRIM66	394.815	1.68946	0.5193	3.14542	0.00165851	0.0390395	162.727	129.643	104.337	410.063	234.486	1327.63
ENSG00000116455	WDR77	820.508	1.69277	0.42743	3.96681	7.28399e-05	0.00331979	423.57	360.499	274.123	1015.84	1606.57	1242.46
ENSG00000176170	SPHK1	1257.97	1.70082	0.406968	4.21227	2.52817e-05	0.00143917	151.56	515.16	1007.33	666.711	1596.37	3610.71
ENSG00000167508	MVD	3863.7	1.70249	0.43248	3.99453	6.48231e-05	0.00303971	2053.24	2261.93	858.412	6653.49	5231.75	6123.4
ENSG00000131981	LGALS3	1466.96	1.71793	0.476646	3.82325	0.000131703	0.00529956	214.577	1492.03	460.033	2086.88	2479.94	2068.29
ENSG00000119938	PPP1R3C	2917.39	1.72196	0.466206	3.77522	0.000159866	0.00627729	500.945	1526.15	1671.3	4145.08	7037.12	2623.78
ENSG00000104044	OCA2	463.453	1.73339	0.475974	3.77632	0.000159163	0.00626812	402.83	151.25	84.4184	807.939	658.429	675.851
ENSG00000163040	CCDC74A	273.242	1.73413	0.473194	3.67701	0.000235987	0.008552	74.9822	173.995	88.2125	256.648	480.865	564.752
ENSG00000149451	ADAM33	386.328	1.73594	0.532573	3.54318	0.000395326	0.0129833	301.524	186.504	30.3527	669.579	541.186	588.824
ENSG00000172296	SPTLC3	789.17	1.74678	0.519381	3.12071	0.00180419	0.0412722	153.155	247.914	229.542	402.177	372.968	3329.26
ENSG00000140479	PCSK6	1109.39	1.75804	0.420819	4.16946	3.05325e-05	0.00167329	738.654	444.653	135.639	3598.81	1146.09	592.527
ENSG00000131831	RAI2	132.765	1.76024	0.531258	3.36451	0.000766804	0.0218496	80.566	36.391	39.8379	183.525	208.148	248.121
ENSG00000138207	RBP4	324.74	1.76729	0.553706	3.33962	0.000838939	0.0233465	43.0749	128.506	189.704	652.373	725.546	209.236
ENSG00000250305	KIAA1456	247.507	1.77123	0.478395	3.73029	0.000191261	0.00716367	97.3173	138.741	65.448	345.543	401.004	436.989
ENSG00000171517	LPAR3	105.711	1.77157	0.554704	3.17649	0.0014907	0.0365334	33.5027	46.626	32.2497	274.57	112.145	135.17
ENSG00000136883	KIF12	54.0811	1.78005	0.69124	3.40642	0.00065822	0.0193417	0.797683	52.3121	5.69113	68.8218	117.243	79.6208
ENSG00000066468	FGFR2	1960.22	1.783	0.411048	4.36301	1.28284e-05	0.000812737	449.095	1393.09	650.686	2534.22	4738.14	1996.08
ENSG00000153933	DGKE	632.423	1.78592	0.458334	3.88543	0.000102149	0.00442959	285.57	191.053	248.513	862.423	1549.64	657.335
ENSG00000125637	PSD4	1712.67	1.788	0.46066	3.87786	0.000105379	0.00453872	621.395	914.324	423.989	1392.92	2825.72	4097.7
ENSG00000250722	SEPP1	839.648	1.80311	0.457337	4.18686	2.82843e-05	0.0015841	1017.84	191.053	64.4995	2144.95	1193.67	425.879
ENSG00000233217	MROH3P	9.82398	1.80714	0.724434	3.13519	0.0017174	0.040004	0	0	0	9.31962	14.443	35.1813
ENSG00000127084	FGD3	77.7101	1.81093	0.648355	3.17714	0.00148737	0.0365019	11.9652	56.861	6.63965	98.9313	69.666	222.198
ENSG00000136653	RASSF5	684.492	1.81235	0.417798	4.34432	1.3971e-05	0.000875813	221.756	386.655	227.645	848.085	1372.93	1049.88
ENSG00000106804	C5	244.345	1.82924	0.536234	3.48456	0.000492939	0.0152368	91.7335	136.466	36.9924	250.913	350.029	599.934
ENSG00000125430	HS3ST3B1	964.308	1.83359	0.432085	4.28105	1.86017e-05	0.0011115	254.461	349.126	575.753	1399.38	1794.32	1412.81
ENSG00000162981	FAM84A	113.642	1.8336	0.597691	3.53586	0.000406449	0.0132625	115.664	18.1955	10.4337	175.639	217.494	144.428
ENSG00000116761	CTH	504.995	1.83592	0.530421	3.57454	0.000350844	0.0117381	52.6471	210.386	254.204	522.615	1706.82	283.302
ENSG00000111319	SCNN1A	250.474	1.83659	0.508921	3.57741	0.000347019	0.011632	70.9938	121.682	65.448	197.863	343.233	703.626
ENSG00000120162	MOB3B	131.997	1.84018	0.528576	3.5194	0.000432523	0.0138237	41.4795	73.9193	32.2497	180.657	208.148	255.527
ENSG00000151320	AKAP6	189.568	1.84454	0.487922	3.80612	0.000141164	0.00562953	43.8726	95.5264	79.6758	252.347	295.656	370.329
ENSG00000074211	PPP2R2C	65.1234	1.8541	0.603077	3.12444	0.00178142	0.0408901	33.5027	9.09775	20.8675	91.0455	60.3206	175.906
ENSG00000128298	BAIAP2L2	20.703	1.8588	0.735856	3.24422	0.00117774	0.030628	0	0	12.3308	14.3379	27.1867	70.3626
ENSG00000167107	ACSF2	1758.17	1.86866	0.454001	4.07912	4.52069e-05	0.00227619	512.112	774.446	535.915	1577.88	1997.38	5151.28
ENSG00000135929	CYP27A1	678.262	1.87055	0.458646	4.0596	4.91561e-05	0.00240609	200.218	309.324	214.366	711.158	788.415	1846.09
ENSG00000161267	BDH1	263.618	1.87184	0.499479	3.70763	0.000209207	0.00770657	78.1729	108.036	77.7788	251.63	293.957	772.137
ENSG00000221869	CEBPD	2068.47	1.87237	0.399476	4.69528	2.66241e-06	0.000213069	841.555	1000.75	618.436	3638.23	3419.58	2892.27
ENSG00000145721	LIX1	71.3118	1.88109	0.619186	3.36124	0.000775947	0.0220049	63.0169	9.09775	7.58818	136.927	142.73	68.5109
ENSG00000244693	CTAGE8	33.4151	1.89343	0.734445	4.19609	2.71568e-05	0.00152683	0	17.0583	0	91.0455	33.1338	59.2527
ENSG00000158473	CD1D	71.3059	1.89558	0.589932	3.29408	0.000987452	0.0264146	17.549	44.3516	12.3308	101.082	146.978	105.544
ENSG00000105889	STEAP1B	148.961	1.91007	0.505385	3.81908	0.000133949	0.00536575	27.1212	63.6843	73.9847	176.356	269.319	283.302
ENSG00000124772	CPNE5	444.999	1.91812	0.494404	3.98246	6.82059e-05	0.00316511	277.594	145.564	78.7273	590.72	662.677	914.714
ENSG00000083782	EPYC	10467.4	1.92584	0.565235	4.14556	3.38979e-05	0.00183521	214.577	10826.3	2867.38	13256.8	23248.1	12391.2
ENSG00000145002	FAM86B2	10.9971	1.92762	0.736187	3.07456	0.00210817	0.0462141	0	1.13722	0	17.9223	13.5934	33.3296
ENSG00000227801	COL11A2	36033.3	1.92888	0.574399	4.0627	4.85083e-05	0.00238091	1612.12	28051.8	8048.21	31431.5	19012.9	128043
ENSG00000178104	PDE4DIP	8077.14	1.93104	0.422299	4.62362	3.77102e-06	0.000286694	1745.33	3208.1	4512.12	13400.2	13000.4	12596.8
ENSG00000107611	CUBN	203.745	1.93187	0.535451	3.63319	0.00027994	0.00982596	57.4332	104.624	36.9924	189.26	278.664	555.494
ENSG00000066185	ZMYND12	59.7467	1.94015	0.613171	3.10242	0.00191944	0.0430536	7.97683	20.4699	19.919	40.8629	63.7189	205.533
ENSG00000129214	SHBG	18.1213	1.9439	0.73847	3.04353	0.00233816	0.0496714	4.7861	0	0.948522	16.4886	16.1421	70.3626
ENSG00000120645	IQSEC3	49.9005	1.94622	0.664285	3.43239	0.000598277	0.0178147	7.97683	0	40.7864	81.7259	26.3371	142.577
ENSG00000257261	RP11-96H19.1	69.4352	1.94742	0.593587	3.16839	0.00153284	0.0370839	14.3583	13.6466	27.5071	53.0501	54.3735	253.676
ENSG00000055813	CCDC85A	223.565	1.95049	0.511557	3.67973	0.000233485	0.0084958	102.103	52.3121	45.5291	701.839	352.578	87.0274
ENSG00000092758	COL9A3	144192	1.97063	0.466369	4.34765	1.37605e-05	0.000865655	22212.3	97508.6	41664.8	150601	169903	383263
ENSG00000073150	PANX2	375.392	1.97102	0.481345	4.05619	4.98801e-05	0.00243486	47.861	249.051	87.264	146.246	836.842	885.087
ENSG00000108387	2022-09-04	689.205	1.98147	0.553121	3.73637	0.000186693	0.007022	363.743	219.483	59.7569	729.081	757.83	2005.33
ENSG00000162542	TMCO4	118.635	1.98423	0.530872	3.75931	0.000170379	0.00657451	55.8378	38.6655	24.6616	241.593	152.925	198.126
ENSG00000188501	LCTL	159.945	1.98794	0.562957	3.80167	0.000143722	0.0057188	40.6818	115.996	16.1249	346.26	207.299	233.308
ENSG00000109906	ZBTB16	831.757	1.99338	0.433136	4.51767	6.25248e-06	0.000434657	145.976	191.053	426.835	577.816	606.604	3042.26
ENSG00000136457	CHAD	3506.44	2.00305	0.478334	4.34112	1.41755e-05	0.000884937	433.939	2108.4	1384.84	6643.45	5337.1	5130.91
ENSG00000058866	DGKG	81.3965	2.01071	0.648768	3.53563	0.000406798	0.0132625	46.2656	25.0188	0.948522	187.826	96.8527	131.467
ENSG00000185955	C7orf61	61.9705	2.01086	0.616703	3.11047	0.00186791	0.0422968	7.97683	13.6466	20.8675	39.4291	39.9305	249.972
ENSG00000145757	SPATA9	24.77	2.01322	0.731743	3.23225	0.00122819	0.0316635	10.3699	1.13722	0	53.767	20.3901	62.956
ENSG00000196358	NTNG2	61.6474	2.0148	0.62894	3.05767	0.00223068	0.0479913	16.7513	21.6072	3.79409	248.045	61.1702	18.5165
ENSG00000143512	HHIPL2	320.511	2.01554	0.625979	4.12221	3.75261e-05	0.00195752	1.59537	225.169	104.337	245.178	591.311	755.472
ENSG00000144115	THNSL2	211.26	2.02118	0.542068	3.6901	0.000224163	0.00817832	73.3868	62.5471	38.8894	212.917	192.856	686.961
ENSG00000080546	SESN1	1154.9	2.02287	0.44611	4.55951	5.12728e-06	0.000370866	267.224	392.341	541.606	2567.2	1492.72	1668.33
ENSG00000163075	PCDP1	39.2347	2.02586	0.718326	3.09962	0.00193772	0.0432201	3.98841	1.13722	10.4337	164.169	50.1255	5.55494
ENSG00000242375	RP11-498P14.3	11.2624	2.02717	0.732247	3.45685	0.000546535	0.0166913	0	0	0	23.6575	16.1421	27.7747
ENSG00000259417	RP11-2E17.1	22.5805	2.02974	0.72762	3.17513	0.00149771	0.036581	3.19073	7.96054	0	51.6163	35.6826	37.0329
ENSG00000173597	SULT1B1	20.7406	2.03129	0.730101	3.14066	0.00168569	0.0394711	0.797683	7.96054	0.948522	23.6575	37.3818	53.6978
ENSG00000198648	STK39	4363.04	2.03877	0.428058	4.84297	1.27916e-06	0.000113698	674.042	2180.05	2027.94	6160.27	8340.38	6795.55
ENSG00000166925	TSC22D4	4015.33	2.04918	0.44136	4.64475	3.40484e-06	0.000264482	739.452	1857.08	1311.81	3745.05	4563.97	11874.6
ENSG00000259172	RP11-299G20.2	89.4229	2.05425	0.561614	3.65241	0.000259793	0.00928293	41.4795	11.3722	26.5586	169.904	59.471	227.753
ENSG00000130822	PNCK	249.268	2.05546	0.494879	4.08769	4.35689e-05	0.00221137	75.7799	55.7237	82.5214	227.972	237.034	816.576
ENSG00000158022	TRIM63	68.1195	2.05771	0.590218	3.48628	0.000489788	0.0151752	23.9305	15.9211	18.0219	98.9313	153.775	98.1373
ENSG00000267645	POLR2J2	101.354	2.06961	0.647512	3.85162	0.000117338	0.00488662	50.254	35.2538	0	129.041	308.4	85.1758
ENSG00000146267	FAXC	294.238	2.07098	0.461085	4.47189	7.75311e-06	0.000518791	58.2308	127.369	99.5948	244.461	528.442	707.329
ENSG00000204282	TNRC6C-AS1	97.576	2.07305	0.56263	3.69524	0.000219679	0.00804259	21.5374	36.391	27.5071	217.219	108.747	174.055
ENSG00000189058	APOD	1756.58	2.07377	0.465399	4.65532	3.23476e-06	0.000252368	752.215	1094	142.278	2375.07	4181.66	1994.22
ENSG00000131386	GALNT15	61.4896	2.07816	0.612315	3.53166	0.000412964	0.0134146	9.57219	9.09775	36.0438	114.703	77.3123	122.209
ENSG00000187123	LYPD6	104.58	2.08343	0.608973	3.86473	0.000111211	0.00474198	72.5891	21.6072	4.74261	136.927	278.664	112.95
ENSG00000164050	PLXNB1	4728.95	2.08955	0.47704	4.36492	1.27167e-05	0.00080853	1693.48	1486.35	936.191	4499.22	5256.39	14502.1
ENSG00000145681	HAPLN1	86956.1	2.09213	0.483695	4.59643	4.29782e-06	0.000321275	5477.69	61515.6	30783.3	106077	225686	92197.2
ENSG00000091879	ANGPT2	155.995	2.09605	0.507401	4.07901	4.52283e-05	0.00227619	47.861	56.861	32.2497	220.803	448.581	129.615
ENSG00000118965	WDR35	568.231	2.10049	0.434111	4.82297	1.41436e-06	0.000123867	241.698	163.76	148.918	1189.33	1123.15	542.533
ENSG00000157322	CLEC18A	12436.5	2.10255	0.502227	4.26109	2.0343e-05	0.00118774	1665.56	8119.75	1800.29	6634.85	18154.8	38243.9
ENSG00000149403	GRIK4	264.572	2.1081	0.489059	4.29555	1.74259e-05	0.00105179	74.9822	102.35	62.6024	245.894	455.378	646.225
ENSG00000109705	NKX3-2	533.346	2.11165	0.471404	4.52587	6.01477e-06	0.000421412	144.381	259.286	115.72	795.752	681.368	1203.57
ENSG00000181577	C6orf223	157.021	2.11354	0.546155	4.07229	4.65533e-05	0.00231103	55.0401	88.7031	12.3308	326.187	250.628	209.236
ENSG00000188916	FAM196A	365.588	2.12233	0.552003	3.9261	8.63333e-05	0.00382737	98.9127	30.7049	176.425	206.465	890.366	790.653
ENSG00000141258	SGSM2	4900.92	2.12778	0.500861	4.13885	3.49048e-05	0.00188402	1336.12	1190.67	992.154	2549.27	5209.66	18127.6
ENSG00000173110	HSPA6	212.99	2.12995	0.531168	4.06857	4.73018e-05	0.00234098	16.7513	108.036	55.0143	110.402	248.929	738.807
ENSG00000156042	TTC18	126.662	2.13335	0.547389	3.92161	8.7958e-05	0.00387058	36.6934	48.9004	22.7645	170.621	169.917	311.077
ENSG00000131781	FMO5	143.749	2.13527	0.555224	3.84487	0.000120615	0.00499979	52.6471	36.391	24.6616	162.735	154.625	431.434
ENSG00000182600	C2orf82	2714.61	2.13716	0.590723	5.02529	5.02674e-07	5.04538e-05	106.889	3120.53	192.55	3618.16	3016.88	6232.64
ENSG00000129646	QRICH2	421.991	2.14204	0.540994	3.81796	0.000134558	0.00537809	84.5544	112.585	73.0362	340.524	225.14	1696.11
ENSG00000172348	RCAN2	119.419	2.14649	0.534755	3.98688	6.6948e-05	0.00311483	53.4447	21.6072	26.5586	337.657	180.962	96.2857
ENSG00000177335	C8orf31	37.8627	2.15195	0.669237	3.21638	0.00129819	0.033181	7.97683	10.235	4.74261	111.835	33.1338	59.2527
ENSG00000122574	WIPF3	69.1477	2.15396	0.618116	3.47373	0.000513285	0.0157837	18.3467	19.3327	9.48522	68.8218	84.109	214.791
ENSG00000136110	LECT1	8844.73	2.15692	0.512197	4.6986	2.61951e-06	0.000212728	319.073	6334.31	3399.5	9546.15	17261.9	16207.5
ENSG00000249307	LINC01088	232.096	2.16362	0.523968	4.10175	4.10042e-05	0.00209309	87.7451	51.1749	44.5805	293.926	191.157	723.994
ENSG00000135299	ANKRD6	2181.11	2.17738	0.46813	4.69349	2.68587e-06	0.000213069	667.661	1018.95	300.681	1630.93	5498.52	3969.93
ENSG00000172345	STARD5	132.305	2.18691	0.53474	4.12313	3.73763e-05	0.00195752	29.5143	57.9982	26.5586	171.338	204.75	303.67
ENSG00000234964	FABP5P7	501.809	2.1918	0.493033	4.55308	5.28654e-06	0.000374799	121.248	262.698	83.4699	1177.86	567.523	798.06
ENSG00000153898	MCOLN2	197.782	2.19894	0.549319	4.21216	2.52939e-05	0.00143917	39.8841	121.682	20.8675	263.817	301.603	438.84
ENSG00000185813	PCYT2	2546.98	2.1997	0.498101	4.47586	7.61056e-06	0.000511166	808.85	1000.75	329.137	2670.43	3242.02	7230.68
ENSG00000145920	CPLX2	14.9914	2.20247	0.740227	3.07058	0.00213644	0.0466393	0	0	1.89704	7.88583	4.24793	75.9175
ENSG00000160307	S100B	1995.76	2.22213	0.496772	4.96934	6.71816e-07	6.56907e-05	126.832	2181.19	253.255	1489.7	4390.66	3532.94
ENSG00000198753	PLXNB3	233.04	2.23309	0.520633	4.47024	7.81332e-06	0.000520868	132.415	70.5076	14.2278	663.127	253.176	264.786
ENSG00000124232	RBPJL	150.053	2.23586	0.588313	4.30178	1.69435e-05	0.00102963	3.98841	94.3892	32.2497	104.666	192.856	472.17
ENSG00000168913	ENHO	440.969	2.23947	0.540987	4.3405	1.42157e-05	0.000884937	34.3004	291.128	53.1172	214.351	625.295	1427.62
ENSG00000091129	NRCAM	382.53	2.25516	0.483401	4.87637	1.08055e-06	9.79956e-05	266.426	103.487	24.6616	968.523	580.267	351.813
ENSG00000224424	PRKAR2A-AS1	42.883	2.26109	0.692877	3.72967	0.000191731	0.00716626	0	14.7839	8.5367	41.5798	53.5239	138.874
ENSG00000183048	SLC25A10	361.799	2.27363	0.462266	4.93347	8.07799e-07	7.67667e-05	133.213	104.624	77.7788	545.556	541.186	768.434
ENSG00000166816	LDHD	279.988	2.28665	0.535357	4.41399	1.0148e-05	0.000664121	27.1212	166.034	38.8894	173.488	428.191	846.203
ENSG00000152763	WDR78	120.606	2.30104	0.550282	4.29932	1.71326e-05	0.0010376	45.4679	44.3516	9.48522	182.091	292.257	149.983
ENSG00000211445	GPX3	1254.22	2.30301	0.417177	5.52225	3.34686e-08	4.39669e-06	413.997	360.499	330.086	1630.93	2408.57	2381.22
ENSG00000160801	PTH1R	5613.4	2.30946	0.522677	4.31622	1.58724e-05	0.000974489	851.128	1601.2	795.81	3805.27	3494.35	23132.6
ENSG00000167703	SLC43A2	176.775	2.30959	0.49364	4.69914	2.61265e-06	0.000212728	60.6239	59.1354	29.4042	302.529	353.428	255.527
ENSG00000203883	SOX18	749.15	2.30993	0.452093	5.23487	1.65098e-07	1.91535e-05	99.7104	521.984	124.256	691.085	1745.05	1312.82
ENSG00000197249	SERPINA1	1881.78	2.31262	0.463694	5.29297	1.20345e-07	1.41453e-05	94.9243	1436.31	499.871	1495.44	4599.66	3164.47
ENSG00000119686	FLVCR2	94.8422	2.31373	0.573655	3.99643	6.43036e-05	0.00302328	25.5258	21.6072	17.0734	165.602	78.1619	261.082
ENSG00000184368	MAP7D2	114.414	2.32265	0.585879	3.85204	0.00011714	0.00488662	22.3351	28.4305	18.0219	45.1643	274.416	298.115
ENSG00000246082	NUDT16P1	73.2274	2.32852	0.595502	3.94409	8.01042e-05	0.00358682	11.1676	29.5677	10.4337	70.2556	140.182	177.758
ENSG00000162645	GBP2	190.801	2.33156	0.547792	4.3311	1.48364e-05	0.000920372	36.6934	78.4681	24.6616	222.954	230.238	551.791
ENSG00000188859	FAM78B	55.3804	2.33218	0.708123	3.20179	0.00136578	0.0342712	7.97683	4.54888	0.948522	8.60272	50.9751	259.231
ENSG00000100399	CHADL	2146.96	2.33795	0.533048	4.74431	2.09219e-06	0.000172254	172.299	1266.86	338.622	2234.56	1897.97	6971.45
ENSG00000169174	PCSK9	858.167	2.34105	0.441834	5.34056	9.26618e-08	1.14172e-05	417.986	241.09	35.0953	3302.73	852.134	299.967
ENSG00000087258	GNAO1	158.428	2.3466	0.546986	4.5185	6.22779e-06	0.000434632	99.7104	20.4699	18.9704	291.776	306.7	212.939
ENSG00000153930	ANKFN1	165.076	2.35172	0.551526	4.26975	1.95692e-05	0.00115769	44.6702	22.7444	45.5291	321.168	434.138	122.209
ENSG00000109193	SULT1E1	94.3666	2.35553	0.652048	4.38801	1.14392e-05	0.000743175	54.2424	3.41166	3.79409	113.269	84.109	307.373
ENSG00000126562	WNK4	777.995	2.35706	0.446749	5.32322	1.01945e-07	1.23064e-05	126.034	359.361	185.91	891.816	1242.09	1862.76
ENSG00000147408	CSGALNACT1	1504.76	2.35818	0.496901	4.81268	1.48919e-06	0.000129155	166.716	517.435	460.033	2963.64	3920.84	999.889
ENSG00000154359	LONRF1	1502.48	2.36385	0.401468	5.88371	4.01172e-09	6.69845e-07	310.299	511.749	466.673	1801.55	3411.94	2512.69
ENSG00000048540	LMO3	35.4701	2.37606	0.699339	3.68995	0.000224302	0.00817832	11.1676	0	5.69113	81.7259	47.5768	66.6593
ENSG00000065361	ERBB3	628.682	2.38125	0.451308	5.29392	1.19725e-07	1.41453e-05	183.467	216.072	112.874	721.195	1249.74	1288.75
ENSG00000175318	GRAMD2	380.867	2.40002	0.511948	4.94945	7.44249e-07	7.18743e-05	57.4332	249.051	40.7864	799.336	631.242	507.351
ENSG00000189280	GJB5	25.9592	2.41013	0.705258	3.45339	0.000553591	0.0168492	2.39305	1.13722	6.63965	22.9406	46.7272	75.9175
ENSG00000157150	TIMP4	2589.87	2.42357	0.429482	5.81566	6.0394e-09	9.3986e-07	135.606	976.871	1292.84	1701.19	4707.55	6725.18
ENSG00000147257	GPC3	4536.4	2.42854	0.467868	5.44008	5.32574e-08	6.8453e-06	2381.88	1539.79	268.432	10192.1	7349.76	5486.43
ENSG00000158008	EXTL1	3914.3	2.44511	0.495874	5.20708	1.91836e-07	2.15556e-05	206.6	2497.33	626.024	2018.06	5778.03	12359.7
ENSG00000130487	KLHDC7B	28.4595	2.45405	0.711894	3.61146	0.000304473	0.010541	2.39305	5.6861	0.948522	53.767	24.638	83.3241
ENSG00000112761	WISP3	187.298	2.46601	0.527655	4.55585	5.2173e-06	0.000374799	7.97683	90.9775	28.4557	33.694	486.812	475.873
ENSG00000070731	ST6GALNAC2	56.3073	2.49153	0.647081	3.78823	0.000151725	0.00601048	7.17915	3.41166	13.2793	228.689	29.7355	55.5494
ENSG00000039139	DNAH5	53.2993	2.50152	0.66135	4.12689	3.67701e-05	0.00194936	1.59537	19.3327	6.63965	73.1231	65.4181	153.687
ENSG00000158683	PKD1L1	70.3705	2.50752	0.621837	4.20002	2.66896e-05	0.00150897	2.39305	40.9399	3.79409	88.8948	256.575	29.6264
ENSG00000003096	KLHL13	554.021	2.54217	0.429283	5.8899	3.8643e-09	6.51317e-07	134.808	187.641	78.7273	1057.42	1434.1	431.434
ENSG00000198796	ALPK2	1491.66	2.54251	0.455789	5.61523	1.96305e-08	2.71218e-06	511.315	268.384	290.248	1699.75	2286.23	3894.01
ENSG00000107623	GDF10	1969.02	2.54769	0.409368	6.24949	4.118e-10	8.65555e-08	315.882	614.098	611.797	3061.85	3918.29	3292.23
ENSG00000163239	TDRD10	27.3307	2.55157	0.723657	3.43796	0.000586124	0.01757	2.39305	1.13722	0.948522	7.16894	35.6826	116.654
ENSG00000262943	ALOX12P2	92.2746	2.5565	0.595015	4.27496	1.91175e-05	0.00113473	21.5374	10.235	14.2278	74.5569	105.349	327.742
ENSG00000223417	TRIM49D1	17.9105	2.56733	0.738195	3.74729	0.000178758	0.00681757	0	0	1.89704	23.6575	46.7272	35.1813
ENSG00000132554	RGS22	105.142	2.57369	0.569383	4.37169	1.23289e-05	0.000789491	9.57219	21.6072	20.8675	47.315	133.385	398.104
ENSG00000145708	CRHBP	129.877	2.57626	0.635581	4.01002	6.07136e-05	0.00287721	26.3235	13.6466	4.74261	90.3286	73.9139	570.307
ENSG00000101347	SAMHD1	2035	2.58216	0.459029	5.62302	1.87652e-08	2.61921e-06	445.905	573.159	321.549	1884.71	3224.18	5760.47
ENSG00000157335	CLEC18C	703.673	2.58591	0.471477	5.61431	1.97349e-08	2.71218e-06	95.7219	352.538	98.6463	845.218	1272.68	1557.24
ENSG00000070808	CAMK2A	94.7422	2.58642	0.549231	4.69764	2.63189e-06	0.000212767	15.156	26.156	18.0219	125.456	202.201	181.461
ENSG00000170323	FABP4	39.7765	2.59032	0.664834	3.93028	8.4847e-05	0.00377083	6.38146	7.96054	2.84557	58.0684	67.1173	96.2857
ENSG00000095370	SH2D3C	130.563	2.59093	0.518696	4.98994	6.03966e-07	5.96158e-05	13.5606	42.0771	30.3527	113.269	289.709	294.412
ENSG00000196167	COLCA1	85.6332	2.59707	0.641803	3.88957	0.000100422	0.00437595	5.58378	15.9211	5.69113	35.1278	55.2231	396.252
ENSG00000166126	AMN	146.241	2.60148	0.630164	4.07484	4.60466e-05	0.00230439	28.7166	10.235	7.58818	65.2373	82.4098	683.258
ENSG00000137441	FGFBP2	6854.99	2.61026	0.613606	5.66327	1.48516e-08	2.15497e-06	27.9189	4543.19	738.899	9349.01	13342.7	13128.2
ENSG00000165863	C10orf82	52.8671	2.61578	0.633666	4.03875	5.37375e-05	0.0025878	6.38146	9.09775	7.58818	37.2785	88.3569	168.5
ENSG00000184481	FOXO4	2102.99	2.64567	0.430579	6.17913	6.44552e-10	1.27951e-07	165.918	668.685	601.363	1686.13	6988.69	2507.13
ENSG00000204128	C2orf72	157.486	2.65763	0.516765	5.21331	1.85502e-07	2.09759e-05	23.9305	62.5471	19.919	267.401	321.143	249.972
ENSG00000008394	MGST1	545.757	2.66909	0.42695	6.2512	4.07303e-10	8.65555e-08	119.652	108.036	150.815	1066.74	816.452	1012.85
ENSG00000147206	NXF3	26.8579	2.69863	0.708284	3.83827	0.000123903	0.00510058	2.39305	3.41166	0.948522	35.8447	40.7801	77.7692
ENSG00000139597	N4BP2L1	426.348	2.7039	0.463155	5.83465	5.39039e-09	8.52254e-07	68.6007	63.6843	138.484	377.086	956.633	953.598
ENSG00000215861	WI2-1896O14.1	140.721	2.70436	0.617266	4.89889	9.63795e-07	8.92184e-05	3.98841	54.5865	9.48522	99.6482	135.934	540.681
ENSG00000171174	RBKS	136.611	2.71066	0.531889	5.1526	2.56894e-07	2.81575e-05	31.9073	43.2143	8.5367	374.218	239.583	122.209
ENSG00000168309	FAM107A	76.3466	2.71601	0.583621	4.63033	3.65076e-06	0.000279934	9.57219	19.3327	10.4337	76.7076	160.572	181.461
ENSG00000176029	C11orf16	21.7903	2.71867	0.727901	3.82336	0.000131648	0.00529956	2.39305	1.13722	0	34.4109	59.471	33.3296
ENSG00000114812	VIPR1	81.8149	2.7193	0.601432	4.6094	4.03826e-06	0.00030442	25.5258	9.09775	6.63965	141.228	91.7552	216.643
ENSG00000174899	C3orf55	23.5115	2.73476	0.713258	3.81913	0.000133924	0.00536575	2.39305	1.13722	1.89704	50.1826	48.4264	37.0329
ENSG00000170374	SP7	189.934	2.73586	0.665487	4.20567	2.60309e-05	0.00147641	0.797683	25.0188	21.816	844.501	110.446	137.022
ENSG00000214226	C17orf67	161.629	2.74165	0.560243	4.87516	1.08721e-06	9.81016e-05	18.3467	42.0771	16.1249	113.986	220.043	559.197
ENSG00000170271	FAXDC2	704.288	2.74364	0.487252	5.69649	1.22298e-08	1.79097e-06	200.218	133.055	87.264	661.693	1595.52	1547.98
ENSG00000180071	ANKRD18A	128.903	2.75081	0.682354	3.1119	0.00185888	0.0421457	3.98841	9.09775	1.89704	7.16894	36.5322	714.736
ENSG00000257572	RP11-478B9.2	28.1463	2.76807	0.735607	3.33837	0.000842702	0.0234148	0	0	0.948522	1.43379	1.69917	164.797
ENSG00000157766	ACAN	167804	2.7703	0.489595	5.98576	2.15381e-09	3.73591e-07	6743.61	79200.5	28364.6	114563	225497	552454
ENSG00000255020	AF131216.5	19.98	2.7858	0.734975	3.97091	7.15975e-05	0.0032799	0	0	1.89704	23.6575	42.4793	51.8461
ENSG00000250033	SLC7A11-AS1	35.634	2.78878	0.692041	3.97978	6.89784e-05	0.00318441	5.58378	2.27444	0.948522	44.4474	140.182	20.3681
ENSG00000135678	CPM	2055.23	2.79979	0.400769	6.95968	3.41056e-12	1.24353e-09	260.842	649.352	358.541	1868.94	6434.76	2758.95
ENSG00000163884	KLF15	1220.58	2.81281	0.452224	6.37091	1.87911e-10	4.30412e-08	82.1613	446.927	313.012	1618.75	2442.56	2420.1
ENSG00000204323	SMIM5	243.696	2.83476	0.545458	5.45119	5.00334e-08	6.47751e-06	22.3351	94.3892	23.713	572.798	310.099	438.84
ENSG00000006747	SCIN	4503.86	2.83641	0.513052	6.08366	1.17472e-09	2.25673e-07	108.485	2465.49	796.758	5273.47	10085.4	8293.53
ENSG00000175899	A2M	6578.56	2.84502	0.506535	5.84407	5.09396e-09	8.12577e-07	702.759	2306.28	766.406	14975.2	5892.72	14828
ENSG00000196091	MYBPC1	123.918	2.90666	0.562582	5.21912	1.79774e-07	2.05888e-05	31.1096	20.4699	7.58818	317.584	122.34	244.417
ENSG00000148702	HABP2	70.1209	2.92825	0.617083	4.93032	8.20931e-07	7.74121e-05	2.39305	23.8816	5.69113	63.0866	157.173	168.5
ENSG00000174059	CD34	183.076	2.93388	0.490781	5.98143	2.21187e-09	3.79973e-07	22.3351	52.3121	25.6101	257.365	451.979	288.857
ENSG00000160867	FGFR4	617.522	2.94766	0.508849	5.99365	2.05187e-09	3.59399e-07	36.6934	221.758	103.389	1026.59	1203.86	1112.84
ENSG00000225164	PRRC2A	50.2839	2.94875	0.716198	3.27028	0.00107442	0.02848	0	0	4.74261	0	2.54876	294.412
ENSG00000196338	NLGN3	1166.28	2.96834	0.460551	6.67212	2.52126e-11	7.76635e-09	44.6702	543.591	177.374	747.003	2594.63	2890.42
ENSG00000168874	ATOH8	1284.12	2.96969	0.453538	6.51126	7.45239e-11	1.95801e-08	204.207	213.797	198.241	1189.33	1694.07	4205.09
ENSG00000181856	SLC2A4	403.156	2.97751	0.445184	6.69315	2.18421e-11	6.84616e-09	87.7451	79.6054	55.9628	701.839	758.68	735.104
ENSG00000105519	CAPS	745.66	3.00425	0.560391	6.04499	1.49419e-09	2.75207e-07	21.5374	330.931	44.5805	563.478	939.642	2573.79
ENSG00000004799	PDK4	484.285	3.01409	0.453636	6.56841	5.0857e-11	1.48953e-08	102.103	73.9193	49.3231	1669.65	673.721	337
ENSG00000224809	BEND3P2	20.0866	3.03356	0.738157	4.50243	6.71807e-06	0.000458111	0	0	0	27.9588	51.8247	40.7362
ENSG00000166091	CMTM5	202.737	3.06544	0.562826	5.93737	2.89627e-09	4.92808e-07	5.58378	93.252	14.2278	192.127	420.545	490.686
ENSG00000129159	KCNC1	66.0148	3.07003	0.630604	5.08575	3.66177e-07	3.75983e-05	1.59537	20.4699	3.79409	60.2191	156.324	153.687
ENSG00000197442	MAP3K5	273.211	3.07343	0.527961	5.85553	4.75501e-09	7.65343e-07	59.8262	29.5677	22.7645	362.748	271.867	892.494
ENSG00000166979	EVA1C	332.532	3.07478	0.493255	6.05009	1.44765e-09	2.69413e-07	28.7166	14.7839	71.1391	183.525	134.235	1562.79
ENSG00000100314	CABP7	43.1106	3.12336	0.664644	4.69374	2.68256e-06	0.000213069	2.39305	5.6861	2.84557	98.9313	54.3735	94.434
ENSG00000218422	AC016773.1	350.214	3.14768	0.458197	6.90357	5.07131e-12	1.81208e-09	29.5143	106.899	41.735	366.333	892.065	664.741
ENSG00000163993	S100P	918.171	3.1894	0.575871	6.51305	7.36396e-11	1.95801e-08	4.7861	302.5	112.874	817.976	1278.63	2992.26
ENSG00000233948	TRIM27	78.3485	3.19398	0.669999	4.03215	5.5268e-05	0.00265435	2.39305	0	7.58818	28.6757	0	431.434
ENSG00000114113	RBP2	51.4811	3.27404	0.72384	3.88767	0.000101213	0.00439968	0	0	0.948522	0.716894	1.69917	305.522
ENSG00000156219	ART3	146.255	3.28944	0.571829	5.87471	4.23585e-09	7.0072e-07	23.1328	22.7444	4.74261	335.506	167.368	324.038
ENSG00000183691	NOG	2302.51	3.3	0.40766	8.09651	5.65604e-16	3.48451e-13	272.01	429.869	340.519	4304.23	5448.39	3020.04
ENSG00000164434	FABP7	453.094	3.31968	0.516945	6.50717	7.65787e-11	1.98283e-08	20.7398	117.134	36.9924	1109.75	1146.94	287.005
ENSG00000214397	DKFZP779J2370	29.6561	3.34011	0.731293	4.55441	5.25326e-06	0.000374799	0	0	0	30.1095	3.39834	144.428
ENSG00000147588	PMP2	719.399	3.5014	0.588252	6.78307	1.17651e-11	3.89251e-09	1.59537	96.6636	128.05	757.757	2421.32	911.01
ENSG00000163661	PTX3	1021.57	3.50323	0.426515	8.23584	1.78301e-16	1.13769e-13	216.172	105.761	84.4184	2562.89	1254.84	1905.34
ENSG00000089356	FXYD3	59.9953	3.52898	0.655535	5.29542	1.18741e-07	1.41429e-05	1.59537	5.6861	1.89704	53.767	63.7189	233.308
ENSG00000166682	TMPRSS5	115.964	3.54399	0.627021	5.64661	1.63639e-08	2.3203e-06	9.57219	4.54888	3.79409	51.6163	150.377	475.873
ENSG00000127743	IL17B	140.096	3.58581	0.598473	6.18108	6.36661e-10	1.27804e-07	2.39305	11.3722	19.919	399.31	203.901	203.681
ENSG00000139209	SLC38A4	3110.3	3.59892	0.538928	7.1098	1.16215e-12	4.41766e-10	62.2193	347.989	558.679	7265	6959.8	3468.14
ENSG00000068078	FGFR3	11135.8	3.66236	0.4217	8.7984	1.38781e-18	1.37748e-15	638.944	2757.76	1012.07	17012.6	26801	18592.4
ENSG00000160862	AZGP1	59.5593	3.69283	0.649672	5.60408	2.09359e-08	2.85527e-06	0	6.82332	3.79409	47.315	140.182	159.242
ENSG00000162510	MATN1	2324.77	3.91484	0.423798	9.28116	1.67642e-20	2.30392e-17	120.45	297.951	268.432	3800.97	6088.98	3371.85
ENSG00000100033	PRODH	334.721	3.93835	0.60365	7.13819	9.45651e-13	3.75444e-10	36.6934	2.27444	10.4337	210.05	350.879	1397.99
ENSG00000182795	C1orf116	156.484	3.99343	0.526706	7.46704	8.2016e-14	3.85605e-11	7.17915	6.82332	19.919	147.68	268.469	488.835
ENSG00000225581	TRIM53AP	40.8645	4.06047	0.701643	5.10215	3.35818e-07	3.50861e-05	0	0	0.948522	25.8082	155.474	62.956
ENSG00000125798	FOXA2	392.911	4.10849	0.4843	8.49275	2.01802e-17	1.45658e-14	5.58378	31.8421	50.2717	277.438	464.723	1527.61
ENSG00000153902	LGI4	2833.92	4.12922	0.459983	8.94716	3.64758e-19	4.07298e-16	162.727	200.151	175.477	2880.48	2867.35	10717.3
ENSG00000159251	ACTC1	1423.89	4.28694	0.473544	9.15733	5.31963e-20	6.78861e-17	196.23	65.9587	36.9924	3989.51	1180.92	3073.73
ENSG00000144331	ZNF385B	1362.13	4.3872	0.599859	8.45746	2.73264e-17	1.87774e-14	3.19073	40.9399	126.153	2581.53	4185.91	1235.05
ENSG00000157734	SNX22	1766	4.42579	0.446763	9.93091	3.05446e-23	9.09516e-20	78.9706	164.897	79.6758	1873.96	3256.46	5142.02
ENSG00000175356	SCUBE2	8668.46	4.59959	0.414079	11.0659	1.83579e-28	8.19957e-25	298.333	566.335	524.533	6186.79	18737.6	25697.2
ENSG00000198598	MMP17	1337.62	4.79259	0.504883	9.39032	5.98163e-21	9.71525e-18	39.0865	29.5677	39.8379	729.081	1051.79	6136.36
ENSG00000224143	EHMT2	78.4046	4.88727	0.682986	6.48466	8.89343e-11	2.23789e-08	0	0	0	39.4291	25.4876	405.511
ENSG00000226788	RING1	210.159	6.42729	0.607707	8.00876	1.15871e-15	6.90052e-13	0	0	1.89704	622.981	319.444	316.632

## Sheet: supplemental file 2b
gene	symbol	baseMean	log2FoldChange	lfcSE	stat	pvalue	padj	RR2-8wT	RR4-8wT	RR22-8wT	RR2-8wB	RR4-8wB	RR22-8wB
ENSG00000000005	TNMD	19788.5	-6.34075	0.316247	-20.0474	2.12621e-89	1.87712e-85	27295.7	31390	58877.1	453.482	274.304	440.486
ENSG00000197859	ADAMTSL2	6289.58	-6.29616	0.291578	-21.5434	6.10433e-103	1.07784e-98	18518.6	6813.2	11998	216.944	90.006	100.712
ENSG00000169436	COL22A1	5063.45	-6.05547	0.408467	-14.8656	5.51563e-50	1.08211e-46	18167.5	4929.41	6979.14	109.172	143.581	51.8818
ENSG00000116690	PRG4	41066.9	-5.76529	0.448221	-13.2042	8.302e-40	6.10785e-37	55036.9	101600	86259.1	2330.39	572.181	602.235
ENSG00000139330	KERA	666.523	-5.70849	0.51447	-10.8185	2.81418e-27	9.938e-25	2670.9	1023.66	271.255	12.5967	7.5005	13.2248
ENSG00000138615	CILP	2160.47	-5.70681	0.296984	-19.1318	1.37368e-81	8.08502e-78	6268.4	2620.46	3865.72	93.0758	43.9315	71.2103
ENSG00000095596	CYP26A1	410.091	-5.54235	0.522669	-10.1199	4.50685e-24	1.20572e-21	1782.08	158.618	497.078	11.1971	7.5005	4.06916
ENSG00000204291	COL15A1	10489.5	-5.48178	0.37659	-14.6158	2.22806e-48	3.57644e-45	17749.7	13135	30956.5	592.746	253.945	249.236
ENSG00000078098	FAP	3375.65	-5.36358	0.407691	-13.3623	1.00435e-40	8.44467e-38	6690.59	7183.59	5938.22	295.323	94.292	51.8818
ENSG00000197959	DNM3	723.224	-5.33732	0.379548	-13.9737	2.2568e-44	2.34402e-41	1173.24	1444.73	1638.22	37.0904	25.716	20.3458
ENSG00000165621	OXGR1	94.4743	-5.31214	0.649402	-6.97947	2.96296e-12	2.05973e-10	77.7718	35.9752	450.31	0.699818	1.0715	1.01729
ENSG00000179954	SSC5D	9270.6	-5.30977	0.388948	-13.881	8.25734e-44	8.09999e-41	23307.1	13594.5	17339	1007.04	213.228	162.766
ENSG00000142661	MYOM3	736.527	-5.23915	0.457634	-11.4324	2.88051e-30	1.18282e-27	831.047	1301.65	2211.46	34.9909	26.7875	13.2248
ENSG00000272636	DOC2B	124.874	-5.2371	0.601684	-8.18493	2.72457e-16	3.06418e-14	326.641	175.788	237.849	4.89873	0	4.06916
ENSG00000163421	PROK2	271.294	-5.21447	0.505893	-9.96491	2.17065e-23	5.2503e-21	1051.03	238.744	315.351	6.99818	7.5005	8.13832
ENSG00000105664	COMP	79704.6	-5.03577	0.293123	-17.2091	2.2701e-66	8.01664e-63	175883	116542	172649	6733.65	2833.05	3585.95
ENSG00000133067	LGR6	414.641	-5.0342	0.408998	-12.1467	5.97379e-34	3.40255e-31	1471	506.923	448.974	41.9891	12.858	6.10374
ENSG00000232258	TMEM114	110.409	-4.9584	0.651174	-7.22736	4.92485e-13	3.86481e-11	92.2151	297.613	265.91	3.49909	3.2145	0
ENSG00000160161	CILP2	59812.1	-4.88944	0.275959	-17.7281	2.54657e-70	1.12412e-66	139489	87762.2	120842	5070.88	2820.19	2888.08
ENSG00000143768	LEFTY2	4183.61	-4.86489	0.484442	-10.6849	1.19776e-26	3.94921e-24	7876.06	6796.85	9600.83	672.525	55.718	99.6944
ENSG00000130812	ANGPTL6	868.869	-4.86237	0.371816	-13.0499	6.36696e-39	4.49686e-36	2788.67	1003.22	1273.43	86.7775	41.7885	19.3285
ENSG00000273018	CTD-2303H24.2	62.765	-4.7577	0.699094	-6.17043	6.81053e-10	3.46552e-08	117.769	99.7493	155.003	0	0	4.06916
ENSG00000113578	FGF1	2118.67	-4.74117	0.296999	-15.9184	4.71971e-57	1.38893e-53	5819.55	5742.94	734.928	207.846	185.369	21.3631
ENSG00000119681	LTBP2	22450.6	-4.73967	0.337885	-14.0528	7.40772e-45	8.71988e-42	38452.6	31328.6	60769.2	1979.09	1091.86	1082.4
ENSG00000172164	SNTB1	632.081	-4.59683	0.408243	-11.2006	4.05006e-29	1.55461e-26	1135.47	649.188	1896.11	51.0867	32.145	28.4841
ENSG00000082497	SERTAD4	1694.44	-4.59052	0.428713	-10.7261	7.67325e-27	2.60551e-24	1586.54	2188.76	6111.93	135.065	57.861	86.4696
ENSG00000261295	RP11-524D16__A.3	438.048	-4.53309	0.402584	-11.2229	3.14647e-29	1.2346e-26	506.628	926.36	1105.06	17.4955	50.3605	22.3804
ENSG00000164708	PGAM2	238.318	-4.49708	0.473936	-9.40876	5.02022e-21	9.53141e-19	489.962	591.955	304.661	11.1971	11.7865	20.3458
ENSG00000101074	R3HDML	84.7329	-4.48331	0.612184	-7.04942	1.79667e-12	1.27919e-10	154.433	237.927	105.562	6.29836	2.143	2.03458
ENSG00000106819	ASPN	19626.1	-4.48015	0.478379	-9.99369	1.62421e-23	4.03924e-21	37978.2	28271.6	46174.8	4389.96	467.174	475.074
ENSG00000100626	GALNT16	432.048	-4.40585	0.471352	-9.47558	2.65289e-21	5.20467e-19	844.379	962.335	689.496	62.9836	10.715	22.3804
ENSG00000154646	TMPRSS15	32.5658	-4.30154	0.761926	-5.2148	1.84017e-07	5.9618e-06	101.103	44.1513	49.4406	0.699818	0	0
ENSG00000162745	OLFML2B	1961.07	-4.27287	0.451096	-9.92618	3.20303e-23	7.64269e-21	4758.52	2995.75	3359.29	534.661	64.29	53.9163
ENSG00000188686	SCXA	1168.33	-4.22429	0.399166	-10.6824	1.23014e-26	3.94921e-24	1916.52	2012.97	2761.99	182.653	50.3605	85.4523
ENSG00000187955	COL14A1	14828.1	-4.12249	0.26495	-15.5718	1.13193e-54	2.85521e-51	40238	13739.2	30410	2180.63	647.186	1753.81
ENSG00000182492	BGN	111032	-4.09762	0.332222	-12.4293	1.8119e-35	1.1426e-32	252715	170081	206226	23073	6253.27	7841.27
ENSG00000206289	RXRB	108.174	-4.09691	0.593021	-6.70144	2.06382e-11	1.31082e-09	215.539	26.9814	387.507	11.8969	0	7.12103
ENSG00000138311	ZNF365	499.978	-4.08885	0.383959	-10.6474	1.79207e-26	5.45561e-24	786.606	1403.03	665.444	23.094	72.862	48.8299
ENSG00000005102	MEOX1	134.801	-4.0488	0.51517	-7.72225	1.14298e-14	1.10282e-12	498.85	142.265	134.959	22.3942	3.2145	7.12103
ENSG00000075223	SEMA3C	2515.82	-4.0487	0.285083	-14.1951	9.82524e-46	1.4457e-42	5651.79	4021.04	4634.05	310.019	259.303	218.717
ENSG00000248610	HSPA8P4	89.9237	-4.02625	0.608954	-6.68566	2.2988e-11	1.43936e-09	149.988	182.329	187.073	2.09945	15.001	3.05187
ENSG00000240583	AQP1	4468.15	-4.01762	0.301587	-13.3042	2.18772e-40	1.75584e-37	13617.8	6512.32	5328.89	601.144	321.45	427.262
ENSG00000197467	COL13A1	1141.14	-3.9921	0.419925	-9.77038	1.50885e-22	3.41561e-20	3237.53	1890.33	1274.77	352.708	39.6455	51.8818
ENSG00000115263	GCG	37.2224	-3.92853	0.762658	-4.75465	1.98787e-06	5.05033e-05	65.5505	153.712	2.67246	1.39964	0	0
ENSG00000171033	PKIA	210.139	-3.89477	0.599503	-7.20765	5.69244e-13	4.38914e-11	406.635	400.632	388.844	57.3851	4.286	3.05187
ENSG00000157680	DGKI	904.05	-3.8428	0.364784	-10.5943	3.16737e-26	9.47903e-24	3620.83	1052.27	390.18	300.222	35.3595	25.4322
ENSG00000149380	P4HA3	1045.62	-3.82207	0.425958	-8.98859	2.50415e-19	3.9834e-17	3558.61	1111.14	1289.46	83.2784	66.433	164.801
ENSG00000134198	TSPAN2	1381.79	-3.76333	0.313104	-11.9738	4.87533e-33	2.6086e-30	4116.35	2570.59	1122.44	213.445	168.225	99.6944
ENSG00000181291	TMEM132E	27.5858	-3.75409	0.764525	-4.55845	5.15319e-06	0.000119409	102.214	33.5223	28.0609	0.699818	0	1.01729
ENSG00000198759	EGFL6	2097.58	-3.72538	0.322675	-11.5977	4.23296e-31	1.86853e-28	4940.73	3031.72	3740.11	505.269	148.938	218.717
ENSG00000086570	FAT2	227.345	-3.70182	0.468855	-7.81153	5.64987e-15	5.63615e-13	994.368	220.757	68.1479	69.282	6.429	5.08645
ENSG00000123560	PLP1	92.953	-3.70074	0.549568	-6.67441	2.48229e-11	1.53788e-09	239.981	107.925	181.728	14.6962	3.2145	10.1729
ENSG00000077264	PAK3	190.343	-3.67207	0.440613	-8.3052	9.9655e-17	1.18892e-14	351.084	334.405	387.507	16.0958	21.43	31.536
ENSG00000251258	RFPL4B	27.174	-3.66678	0.782079	-4.47701	7.56952e-06	0.00016897	99.9923	53.9627	8.01739	0	1.0715	0
ENSG00000243649	CFB	302.083	-3.66296	0.496389	-7.30021	2.87327e-13	2.35969e-11	1129.91	273.902	324.704	21.6944	24.6445	37.6397
ENSG00000197614	MFAP5	6566.23	-3.646	0.733558	-5.03279	4.83388e-07	1.42968e-05	1842.08	15182.3	21566.8	322.616	187.512	296.031
ENSG00000235336	SLC44A4	42.9305	-3.6407	0.728372	-4.73066	2.23792e-06	5.60495e-05	182.208	38.428	32.0696	0.699818	2.143	2.03458
ENSG00000049323	LTBP1	17910.1	-3.63373	0.343468	-10.6498	1.74796e-26	5.41467e-24	33156.3	28746.6	37834.1	4332.57	1740.12	1651.06
ENSG00000017427	IGF1	753.111	-3.62021	0.413469	-8.85751	8.18192e-19	1.21402e-16	1487.66	1497.06	1223.99	84.678	49.289	175.991
ENSG00000175600	SUGCT	517.969	-3.61714	0.412377	-8.73751	2.38306e-18	3.3395e-16	656.616	639.377	1631.54	74.8806	52.5035	52.8991
ENSG00000086991	NOX4	147.128	-3.61423	0.504861	-7.10417	1.21048e-12	8.94286e-11	166.654	279.625	388.844	16.0958	20.3585	11.1902
ENSG00000111262	KCNA1	100.811	-3.60755	0.578312	-6.20444	5.48906e-10	2.85901e-08	182.208	297.613	96.2087	4.89873	10.715	13.2248
ENSG00000174946	GPR171	128.045	-3.60561	0.695973	-4.78543	1.70621e-06	4.40448e-05	8.8882	295.16	446.302	6.29836	8.572	3.05187
ENSG00000154096	THY1	2088.69	-3.60487	0.365302	-10.0353	1.0659e-23	2.68866e-21	6120.64	2717.76	2645.74	772.599	175.726	99.6944
ENSG00000156427	FGF18	618.551	-3.59289	0.482734	-7.79709	6.33496e-15	6.24896e-13	2003.18	829.064	590.615	230.94	10.715	46.7953
ENSG00000006283	CACNA1G	749.524	-3.58984	0.358789	-10.0673	7.70978e-24	2.00194e-21	2560.91	755.478	840.49	241.437	63.2185	35.6051
ENSG00000105088	OLFM2	1158.2	-3.58621	0.441571	-8.33456	7.7784e-17	9.34307e-15	3061.99	2438.13	915.319	412.193	50.3605	71.2103
ENSG00000143196	DPT	2111.31	-3.58194	0.374178	-9.83232	8.17129e-23	1.92374e-20	7263.88	1783.22	2417.24	1008.44	76.0765	119.023
ENSG00000220785	MTMR9LP	322.01	-3.56202	0.391078	-9.11993	7.51699e-20	1.26407e-17	777.718	483.212	534.493	76.2802	26.7875	33.5706
ENSG00000143126	CELSR2	239.832	-3.56059	0.424223	-8.38191	5.20759e-17	6.38544e-15	393.303	557.615	392.852	20.2947	33.2165	41.7089
ENSG00000140945	CDH13	399.012	-3.55726	0.367131	-9.66793	4.12637e-22	8.67372e-20	332.197	619.754	1278.77	20.9945	58.9325	83.4177
ENSG00000116194	ANGPTL1	131.104	-3.5562	0.604553	-6.29608	3.05261e-10	1.65772e-08	322.197	277.172	138.968	3.49909	40.717	4.06916
ENSG00000204262	COL5A2	54604.9	-3.55195	0.321019	-11.0427	2.37748e-28	8.93174e-26	134757	51957.1	118947	8387.32	6822.24	6757.85
ENSG00000165623	UCMA	1806.76	-3.54986	0.795549	-6.07036	1.27621e-09	6.2249e-08	1428.78	6368.42	2965.1	62.2838	13.9295	2.03458
ENSG00000185274	WBSCR17	776.737	-3.53059	0.363301	-9.7518	1.81223e-22	3.99982e-20	1572.1	1022.02	1721.07	69.282	85.72	190.233
ENSG00000113296	THBS4	1121.93	-3.52143	0.324721	-10.8335	2.38777e-27	8.60424e-25	2805.34	1676.93	1769.17	161.658	182.155	136.317
ENSG00000273003	RP11-399J13.3	21.6698	-3.5189	0.801139	-4.51295	6.39319e-06	0.00014491	13.3323	49.8747	66.8116	0	0	0
ENSG00000235531	RP11-383H13.1	257.601	-3.47569	0.564704	-6.63542	3.2357e-11	1.97691e-09	362.194	275.537	805.748	73.4809	3.2145	25.4322
ENSG00000091972	CD200	109.697	-3.45523	0.579247	-6.11099	9.90169e-10	4.97345e-08	203.318	201.951	212.461	2.79927	20.3585	17.2939
ENSG00000049192	ADAMTS6	2258.15	-3.45261	0.280595	-12.3064	8.3673e-35	4.92471e-32	3336.41	5029.98	4112.92	250.535	444.672	374.363
ENSG00000161681	SHANK1	112.865	-3.43905	0.580908	-6.02229	1.71963e-09	8.16226e-08	314.42	136.542	187.073	10.4973	23.573	5.08645
ENSG00000133110	POSTN	297903	-3.41205	0.332772	-10.2491	1.1944e-24	3.24455e-22	424238	366007	864875	33378.5	53682.1	45238.9
ENSG00000261321	FAM101B	3886.89	-3.40357	0.320623	-10.653	1.68902e-26	5.32554e-24	7261.66	7319.31	6806.77	988.843	456.459	488.299
ENSG00000102359	SRPX2	3459.91	-3.39337	0.42281	-8.1736	2.99311e-16	3.32386e-14	4686.3	6697.92	7731.44	939.856	461.816	242.115
ENSG00000137877	SPTBN5	399.655	-3.38265	0.376403	-8.9762	2.8029e-19	4.41882e-17	601.065	754.661	859.197	73.4809	53.575	55.9509
ENSG00000189320	FAM180A	1982.68	-3.36886	0.34441	-9.79788	1.14971e-22	2.6711e-20	2647.57	4117.52	4185.08	362.506	371.81	211.596
ENSG00000161381	PLXDC1	380.242	-3.3575	0.376999	-8.90688	5.24896e-19	8.05921e-17	1171.02	491.388	436.948	106.372	28.9305	46.7953
ENSG00000136928	GABBR2	19.9802	-3.34824	0.79698	-4.14798	3.35424e-05	0.000631405	48.8851	55.598	14.6986	0.699818	0	0
ENSG00000170571	EMB	371.123	-3.34808	0.461258	-7.29222	3.04878e-13	2.48076e-11	502.183	542.08	1024.89	75.5804	52.5035	29.5014
ENSG00000181195	PENK	105130	-3.33936	0.307513	-10.9003	1.14815e-27	4.22351e-25	206717	182336	186171	29219.5	12911.6	13425.2
ENSG00000132386	SERPINF1	6932.97	-3.3285	0.466152	-7.57786	3.51305e-14	3.13282e-12	14738.9	6636.6	16013.4	3447.3	416.813	344.861
ENSG00000170011	MYRIP	88.7081	-3.32545	0.581445	-5.48728	4.08172e-08	1.53998e-06	22.2205	90.7555	388.844	2.79927	3.2145	24.4149
ENSG00000138271	GPR87	58.3098	-3.30352	0.69183	-4.81444	1.47617e-06	3.86717e-05	38.8859	217.486	77.5015	4.19891	11.7865	0
ENSG00000148288	GBGT1	367.327	-3.29708	0.361697	-9.10197	8.87113e-20	1.45035e-17	614.397	684.346	722.902	52.4864	72.862	56.9682
ENSG00000166033	HTRA1	35299	-3.29421	0.343586	-9.69657	3.11794e-22	6.71383e-20	78591.7	48403.8	64251.4	13345.5	3459.87	3741.59
ENSG00000160224	AIRE	27.8157	-3.29363	0.772765	-4.12778	3.66279e-05	0.000682935	122.213	35.1575	6.68116	0.699818	2.143	0
ENSG00000196735	HLA-DQA1	66.4189	-3.24165	0.681372	-5.01125	5.40777e-07	1.57306e-05	153.321	161.071	64.1392	1.39964	5.3575	13.2248
ENSG00000145861	C1QTNF2	391.476	-3.22603	0.451454	-7.37349	1.66216e-13	1.39094e-11	897.708	600.949	614.667	174.955	31.0735	29.5014
ENSG00000196611	MMP1	1764.63	-3.22559	0.446301	-6.60881	3.8743e-11	2.34276e-09	9305.95	690.069	80.1739	421.99	62.147	27.4668
ENSG00000124212	PTGIS	1347.13	-3.22445	0.392171	-8.25481	1.52142e-16	1.76735e-14	2127.61	1349.07	3935.2	112.671	276.447	281.789
ENSG00000102755	FLT1	226.498	-3.22207	0.473916	-6.8328	8.32751e-12	5.44588e-10	484.407	282.078	485.052	22.3942	52.5035	32.5533
ENSG00000198108	CHSY3	4151.18	-3.21471	0.346366	-9.31564	1.21215e-20	2.20649e-18	7597.19	5742.13	9334.92	484.974	1028.64	719.224
ENSG00000111245	MYL2	27.2847	-3.19423	0.782216	-3.83314	0.000126516	0.00202178	5.55513	51.5099	104.226	1.39964	0	1.01729
ENSG00000174348	PODN	527.014	-3.19273	0.511087	-6.69477	2.16009e-11	1.36705e-09	872.155	811.076	1165.19	245.636	37.5025	30.5187
ENSG00000014914	MTMR11	1935.06	-3.18881	0.299278	-10.684	1.20948e-26	3.94921e-24	4990.73	2735.75	2751.3	647.332	220.729	264.495
ENSG00000214688	C10orf105	142.665	-3.15186	0.541344	-5.67423	1.39312e-08	5.8152e-07	48.8851	426.796	320.696	9.79746	39.6455	10.1729
ENSG00000106809	OGN	14878.4	-3.12538	0.300417	-10.467	1.22522e-25	3.4893e-23	39402.5	17557.5	22720	6131.81	1465.81	1992.87
ENSG00000188730	VWC2	18.5788	-3.11951	0.791761	-3.78038	0.000156589	0.00241533	27.7756	35.1575	46.7681	0.699818	1.0715	0
ENSG00000114646	CSPG5	180.609	-3.11826	0.553153	-6.06629	1.309e-09	6.34971e-08	381.082	259.185	335.394	88.1771	9.6435	10.1729
ENSG00000203710	CR1	28.7634	-3.11063	0.773059	-3.85228	0.000117021	0.00189043	137.767	13.8995	17.371	1.39964	2.143	0
ENSG00000255201	RP11-350N15.4	96.2532	-3.10587	0.65197	-5.1861	2.14742e-07	6.81961e-06	252.203	144.718	140.304	2.09945	31.0735	7.12103
ENSG00000102109	PCSK1N	386.114	-3.10328	0.397341	-7.87158	3.50192e-15	3.68055e-13	802.16	574.785	712.212	121.069	33.2165	73.2448
ENSG00000128512	DOCK4	480.206	-3.10045	0.363883	-8.50401	1.83153e-17	2.3955e-15	1388.78	632.836	597.296	111.971	96.435	53.9163
ENSG00000140092	FBLN5	11083.8	-3.09853	0.287654	-10.7846	4.0694e-27	1.40889e-24	20499.5	19819	19537.1	2873.45	2106.57	1667.34
ENSG00000164440	TXLNB	62.4656	-3.08083	0.642812	-4.74405	2.09486e-06	5.29171e-05	78.8828	39.2456	233.841	2.09945	7.5005	13.2248
ENSG00000165973	NELL1	33.2416	-3.07311	0.752933	-4.19978	2.6717e-05	0.000521263	119.991	33.5223	38.7507	2.09945	0	5.08645
ENSG00000143355	LHX9	39.1221	-3.07269	0.708841	-4.09036	4.30702e-05	0.000784011	144.433	65.4094	14.6986	2.79927	5.3575	2.03458
ENSG00000236841	AC007750.5	71.6131	-3.04307	0.601253	-4.8602	1.1727e-06	3.15645e-05	213.317	175.788	10.6899	20.2947	8.572	1.01729
ENSG00000171812	COL8A2	6055.91	-3.04239	0.347935	-8.88207	6.56293e-19	9.90441e-17	15022.2	7992.21	8971.46	3049.81	577.538	722.276
ENSG00000101938	CHRDL1	849.82	-3.03559	0.43066	-7.00128	2.53627e-12	1.7771e-10	3573.06	564.156	570.571	193.15	153.224	44.7607
ENSG00000109265	KIAA1211	692.508	-3.03376	0.34034	-8.92059	4.63796e-19	7.18356e-17	1062.14	1080.07	1595.46	92.376	170.368	154.628
ENSG00000167971	CASKIN1	59.1542	-3.0208	0.684405	-4.60043	4.21612e-06	9.96574e-05	187.763	53.1451	93.5363	3.49909	13.9295	3.05187
ENSG00000164929	BAALC	203.414	-2.98533	0.629225	-4.86415	1.14951e-06	3.10351e-05	58.8843	672.081	414.232	37.0904	31.0735	7.12103
ENSG00000106624	AEBP1	34756.3	-2.97635	0.284521	-10.4889	9.71861e-26	2.81314e-23	79648.3	47379.3	58158.2	12652	5196.77	5503.54
ENSG00000088992	TESC	103.855	-2.97403	0.571092	-5.32222	1.02508e-07	3.52823e-06	163.321	206.857	199.099	25.1935	23.573	5.08645
ENSG00000049540	ELN	67358.4	-2.9653	0.307924	-9.60095	7.92077e-22	1.62624e-19	199104	50427.4	114645	15014.6	7259.41	17700.8
ENSG00000141655	TNFRSF11A	65.2341	-2.95343	0.761994	-3.15779	0.00158971	0.0166092	269.979	109.561	0	5.59855	3.2145	3.05187
ENSG00000174171	RP11-23P13.6	98.4579	-2.94466	0.607918	-5.03336	4.8196e-07	1.42785e-05	164.432	168.429	208.452	19.5949	26.7875	3.05187
ENSG00000229108	AC005550.4	23.4529	-2.9433	0.749343	-3.86315	0.000111932	0.0018132	57.7733	28.6166	48.1044	2.09945	1.0715	3.05187
ENSG00000006210	CX3CL1	993.323	-2.93756	0.316946	-9.27831	1.7218e-20	3.10223e-18	2420.92	1291.84	1595.46	328.215	181.083	142.421
ENSG00000144057	ST6GAL2	500.265	-2.92583	0.427383	-6.69415	2.16923e-11	1.36793e-09	1838.75	708.874	207.116	126.667	63.2185	56.9682
ENSG00000132561	MATN2	3761.36	-2.92114	0.441013	-7.15253	8.51918e-13	6.34697e-11	10030.3	3863.24	5066.99	3140.78	218.586	248.219
ENSG00000221995	TIAF1	15.7798	-2.90926	0.811621	-3.96853	7.2316e-05	0.00124574	13.3323	46.6042	34.742	0	0	0
ENSG00000163347	CLDN1	992.096	-2.8973	0.757762	-3.84434	0.000120876	0.00194736	462.187	645.1	4654.1	114.07	36.431	40.6916
ENSG00000182379	NXPH4	1106.01	-2.88963	0.34474	-8.40258	4.36771e-17	5.39306e-15	2334.26	1719.45	1845.34	200.848	342.88	193.285
ENSG00000104881	PPP1R13L	839.856	-2.88901	0.324346	-8.9227	4.55068e-19	7.11074e-17	1685.43	1292.65	1489.9	275.728	148.938	146.49
ENSG00000143816	WNT9A	442.276	-2.8889	0.370235	-7.86536	3.68033e-15	3.84518e-13	1539.88	618.119	177.719	242.837	56.7895	18.3112
ENSG00000109625	CPZ	178.841	-2.88724	0.461345	-6.11078	9.91478e-10	4.97345e-08	648.839	270.631	60.1305	48.9873	34.288	10.1729
ENSG00000162105	SHANK2	76.9328	-2.88264	0.686406	-4.22245	2.41664e-05	0.000475174	157.766	251.008	24.0522	1.39964	18.2155	9.15561
ENSG00000164125	FAM198B	1746.34	-2.88196	0.313232	-9.2085	3.30723e-20	5.78175e-18	4805.18	2214.93	2291.64	556.356	393.24	216.683
ENSG00000115221	ITGB6	52.2858	-2.87538	0.668573	-3.83308	0.000126549	0.00202178	2.22205	250.191	41.4232	0.699818	17.144	2.03458
ENSG00000172733	PURG	110.709	-2.86913	0.531925	-5.46006	4.75982e-08	1.77308e-06	198.874	81.7617	315.351	9.79746	9.6435	48.8299
ENSG00000169181	GSG1L	156.713	-2.85167	0.549431	-5.46674	4.58397e-08	1.71481e-06	433.3	287.801	110.907	89.5767	7.5005	11.1902
ENSG00000203706	SERTAD4-AS1	148.765	-2.85001	0.555545	-5.31889	1.04403e-07	3.57255e-06	185.541	323.776	295.307	56.6853	15.001	16.2766
ENSG00000260463	MAPK15	47.6761	-2.84623	0.664993	-4.05134	5.09261e-05	0.000904773	198.874	43.3337	26.7246	7.698	5.3575	4.06916
ENSG00000073756	PTGS2	4784.75	-2.84611	0.322967	-8.77651	1.68631e-18	2.42074e-16	16132.1	6651.32	2957.08	1293.96	1259.01	415.054
ENSG00000100276	RASL10A	331.08	-2.84232	0.47355	-6.17919	6.44312e-10	3.30716e-08	713.278	869.127	169.702	178.454	39.6455	16.2766
ENSG00000171840	NINJ2	194.481	-2.83875	0.433732	-6.53819	6.22659e-11	3.68936e-09	269.979	427.614	346.084	45.4882	48.2175	29.5014
ENSG00000136999	NOV	1220.4	-2.82593	0.516191	-5.37706	7.57101e-08	2.68436e-06	5699.56	694.157	423.586	207.146	57.861	240.08
ENSG00000124225	PMEPA1	10476.4	-2.82081	0.280272	-10.0633	8.02849e-24	2.05448e-21	18137.5	15587.9	21806	2469.66	2566.24	2290.94
ENSG00000154175	ABI3BP	5002.83	-2.81611	0.386833	-7.29849	2.91007e-13	2.37885e-11	12690.1	4322.74	9754.5	1443.03	1204.37	602.235
ENSG00000122176	FMOD	72553.7	-2.81478	0.381388	-7.50473	6.1555e-14	5.40735e-12	104278	97917	180039	6046.43	25716	21326.5
ENSG00000166923	GREM1	6072.65	-2.81014	0.373791	-7.81399	5.54075e-15	5.5587e-13	21861.6	5702.06	3439.46	4431.95	819.697	181.078
ENSG00000138759	FRAS1	494.676	-2.80905	0.501499	-5.57596	2.46162e-08	9.81148e-07	1241.02	207.675	1232.01	191.75	60.004	35.6051
ENSG00000148848	ADAM12	1973.11	-2.80657	0.368273	-7.74367	9.65909e-15	9.3709e-13	2810.89	3961.36	3518.3	202.247	965.421	380.466
ENSG00000139200	PIANP	159.45	-2.79991	0.476121	-5.94911	2.69605e-09	1.24618e-07	233.315	255.097	360.783	13.9964	38.574	54.9336
ENSG00000125879	OTOR	22.0822	-2.79868	0.809953	-2.99552	0.00273976	0.0257593	124.435	7.35856	0	0.699818	0	0
ENSG00000176532	PRR15	42.2673	-2.79197	0.676478	-4.06077	4.89107e-05	0.00087234	38.8859	66.227	130.951	4.89873	8.572	4.06916
ENSG00000166482	MFAP4	24732.5	-2.78341	0.293926	-9.48427	2.44088e-21	4.84255e-19	53679.2	32404.6	44226.6	8618.96	5321.07	4144.44
ENSG00000116983	HPCAL4	21.1388	-2.78012	0.812539	-3.47463	0.000511554	0.00664155	34.4418	92.3907	0	0	0	0
ENSG00000156925	ZIC3	15.6902	-2.75878	0.809713	-3.45974	0.000540695	0.00698394	78.8828	6.54094	8.01739	0.699818	0	0
ENSG00000145936	KCNMB1	462.868	-2.75766	0.464389	-6.08263	1.18225e-09	5.81253e-08	759.941	596.861	1089.03	210.645	73.9335	46.7953
ENSG00000196878	LAMB3	1532.71	-2.74997	0.400278	-6.88249	5.88155e-12	3.93373e-10	1760.98	5361.93	1086.36	513.667	347.166	126.144
ENSG00000226812	RP5-881L22.5	14.147	-2.7451	0.810256	-3.5452	0.000392316	0.00531235	22.2205	39.2456	22.716	0.699818	0	0
ENSG00000180772	AGTR2	274.879	-2.74207	0.5914	-5.126	2.95958e-07	9.29844e-06	961.037	326.229	188.409	16.7956	143.581	13.2248
ENSG00000151023	ENKUR	64.9571	-2.73899	0.598317	-4.65862	3.18344e-06	7.71056e-05	106.658	138.177	105.562	5.59855	23.573	10.1729
ENSG00000099365	STX1B	89.8584	-2.73586	0.61561	-4.47271	7.72349e-06	0.000171539	278.867	91.5731	122.933	6.99818	22.5015	16.2766
ENSG00000223953	C1QTNF5	3521.47	-2.73558	0.46099	-6.52207	6.93417e-11	4.08122e-09	8598.22	4567.21	4227.84	3236.66	189.655	309.256
ENSG00000157613	CREB3L1	2412.08	-2.73035	0.339179	-8.14354	3.83896e-16	4.23653e-14	5902.88	2903.36	3649.25	1345.05	352.523	319.429
ENSG00000157168	NRG1	93.6635	-2.73022	0.646699	-4.30383	1.67873e-05	0.000342279	243.315	229.75	45.4319	10.4973	8.572	24.4149
ENSG00000260235	CTD-2026K11.3	14.2792	-2.72858	0.812654	-3.84026	0.000122902	0.0019764	18.8874	40.0632	26.7246	0	0	0
ENSG00000183722	LHFP	3195.7	-2.71447	0.307111	-8.87059	7.27618e-19	1.08878e-16	6856.14	4669.41	5147.17	1300.26	699.689	501.524
ENSG00000198626	RYR2	14.7344	-2.70849	0.809572	-3.57421	0.000351291	0.00484589	42.219	27.799	17.371	0	0	1.01729
ENSG00000164171	ITGA2	227.587	-2.70564	0.564657	-4.75235	2.01063e-06	5.10083e-05	839.935	233.839	175.046	18.8951	63.2185	34.5878
ENSG00000260121	RP5-1142A6.9	221.555	-2.69048	0.497695	-5.43714	5.4143e-08	1.98753e-06	585.51	353.211	245.867	25.1935	70.719	48.8299
ENSG00000136383	ALPK3	1509.55	-2.68747	0.324522	-8.26564	1.38949e-16	1.63561e-14	2935.33	3650.66	1366.97	289.025	532.535	282.806
ENSG00000126010	GRPR	13.4726	-2.67786	0.811278	-3.52488	0.000423676	0.0056716	33.3308	29.4342	17.371	0.699818	0	0
ENSG00000166348	USP54	2199	-2.67329	0.317631	-8.45025	2.9067e-17	3.69235e-15	7362.76	2374.36	1693.01	1220.48	223.943	319.429
ENSG00000196562	SULF2	4374.41	-2.65215	0.432202	-6.20469	5.48033e-10	2.85901e-08	5582.9	5291.62	12234.5	1722.95	873.272	541.198
ENSG00000259436	CTC-378H22.2	13.2705	-2.65073	0.811532	-3.50252	0.000460871	0.00610472	36.6638	15.5347	26.7246	0.699818	0	0
ENSG00000137809	ITGA11	6314.83	-2.64892	0.356381	-7.44354	9.80227e-14	8.36129e-12	14693.3	7033.14	11466.2	1314.96	2028.35	1353
ENSG00000262061	RP11-1260E13.4	49.127	-2.64727	0.709864	-4.17403	2.99259e-05	0.000574975	85.5489	71.9503	112.244	0.699818	18.2155	6.10374
ENSG00000172346	CSDC2	770.488	-2.64547	0.464616	-6.04677	1.47776e-09	7.07123e-08	1243.24	1945.93	762.989	456.282	177.869	36.6224
ENSG00000102996	MMP15	361.458	-2.6429	0.451781	-6.08509	1.16423e-09	5.74211e-08	965.481	305.789	569.235	260.332	35.3595	32.5533
ENSG00000165757	KIAA1462	1425.1	-2.62378	0.305637	-8.56661	1.06575e-17	1.41488e-15	2172.05	1659.76	3635.89	356.207	308.592	418.106
ENSG00000017373	SRCIN1	46.7919	-2.60505	0.666911	-3.94322	8.03947e-05	0.00136493	126.657	59.6861	69.4841	4.19891	7.5005	13.2248
ENSG00000117122	MFAP2	7932.28	-2.60186	0.276676	-9.41937	4.53788e-21	8.80499e-19	20402.9	10450	10139.3	3545.98	1298.66	1756.86
ENSG00000136404	TM6SF1	256.538	-2.60086	0.520771	-4.96469	6.88107e-07	1.94399e-05	201.096	224.027	963.424	79.0795	27.859	43.7434
ENSG00000189409	MMP23B	771.302	-2.59923	0.490527	-5.79759	6.72732e-09	2.98453e-07	2447.59	916.549	470.354	700.518	24.6445	68.1584
ENSG00000128655	PDE11A	124.445	-2.5931	0.585268	-4.58243	4.59597e-06	0.00010706	276.645	120.19	268.583	9.79746	45.003	26.4495
ENSG00000255690	AC005013.1	21.2258	-2.58914	0.797116	-3.71309	0.000204746	0.00303543	44.441	53.9627	24.0522	4.89873	0	0
ENSG00000087245	MMP2	23740.4	-2.58107	0.309869	-8.37992	5.2962e-17	6.44932e-15	57893.3	28374.6	35378.1	12436.5	4868.9	3491.34
ENSG00000133048	CHI3L1	1200.55	-2.57983	0.339612	-7.50261	6.25571e-14	5.46818e-12	2792.01	3100.4	446.302	303.721	448.958	111.902
ENSG00000077782	FGFR1	16015	-2.57871	0.330953	-7.81947	5.30472e-15	5.38307e-13	33784.1	20025.9	29153.9	5887.57	4677.1	2561.53
ENSG00000234836	AIF1	140.896	-2.57731	0.460069	-5.56567	2.61152e-08	1.03855e-06	182.208	475.036	86.8551	27.9927	61.0755	12.2075
ENSG00000184144	CNTN2	35.0308	-2.56606	0.702754	-3.76626	0.000165709	0.00254207	54.4402	57.2332	80.1739	3.49909	11.7865	3.05187
ENSG00000158125	XDH	67.5795	-2.56435	0.676789	-3.93233	8.41253e-05	0.00142144	192.207	56.4156	121.597	2.79927	18.2155	14.2421
ENSG00000077942	FBLN1	8532.62	-2.5611	0.303952	-8.43409	3.33779e-17	4.17981e-15	19184.1	9122.16	15819.7	3567.67	1842.98	1659.2
ENSG00000058085	LAMC2	2253.76	-2.5576	0.453504	-5.23246	1.67273e-07	5.46951e-06	5726.22	6190.18	261.902	811.789	390.026	142.421
ENSG00000028277	POU2F2	195.995	-2.54558	0.553901	-4.71659	2.39832e-06	5.99817e-05	451.076	420.255	168.365	13.9964	64.29	57.9855
ENSG00000137766	UNC13C	53.7913	-2.54524	0.627388	-3.9968	6.42038e-05	0.00111778	64.4395	64.5918	163.02	11.8969	9.6435	9.15561
ENSG00000239754	CFB	722.715	-2.54462	0.449112	-6.07158	1.2666e-09	6.19512e-08	1803.19	873.215	859.197	671.126	67.5045	62.0547
ENSG00000074660	SCARF1	308.888	-2.54158	0.407343	-6.17679	6.54179e-10	3.34807e-08	991.035	403.085	237.849	105.673	54.6465	61.0374
ENSG00000196083	IL1RAP	1618.26	-2.54092	0.439609	-5.75076	8.88419e-09	3.81167e-07	1867.63	1323.72	5417.09	283.426	518.606	299.083
ENSG00000149968	MMP3	560.203	-2.53452	0.431704	-5.87773	4.15921e-09	1.88305e-07	1883.19	932.084	40.087	438.786	58.9325	8.13832
ENSG00000262655	SPON1	522.701	-2.53394	0.791404	-3.49157	0.000480183	0.00631317	1996.51	555.162	461	6.29836	45.003	72.2276
ENSG00000170382	LRRN2	305.858	-2.5324	0.395701	-6.35414	2.09598e-10	1.16015e-08	933.261	283.713	391.516	95.8751	51.432	79.3486
ENSG00000138028	CGREF1	201.618	-2.50988	0.47079	-5.37468	7.672e-08	2.71472e-06	258.869	396.544	396.861	79.0795	40.717	37.6397
ENSG00000002587	HS3ST1	41.7042	-2.49755	0.645124	-3.85278	0.000116787	0.00188837	74.4387	85.8498	64.1392	6.99818	9.6435	9.15561
ENSG00000070729	CNGB1	13.8577	-2.49185	0.811317	-3.11193	0.00185867	0.0188288	45.552	33.5223	2.67246	1.39964	0	0
ENSG00000105976	MET	540.403	-2.48241	0.378885	-6.57279	4.93799e-11	2.96565e-09	799.938	1200.26	787.041	216.944	124.294	113.936
ENSG00000118257	NRP2	1881.45	-2.48161	0.317884	-7.80366	6.01351e-15	5.9652e-13	4996.28	1499.51	3181.57	918.861	336.451	356.051
ENSG00000226033	STK19	17.2868	-2.48015	0.811925	-3.1253	0.00177623	0.0180974	0	70.3151	33.4058	0	0	0
ENSG00000196990	FAM163B	52.3874	-2.47623	0.718592	-4.18416	2.86219e-05	0.00055475	216.65	31.8871	29.3971	36.3905	0	0
ENSG00000063180	CA11	182.587	-2.47618	0.459741	-5.42525	5.78734e-08	2.11567e-06	313.309	298.43	334.058	69.9818	27.859	51.8818
ENSG00000123700	KCNJ2	216.23	-2.47584	0.555504	-4.47307	7.71043e-06	0.000171465	498.85	68.6798	566.563	14.6962	21.43	127.161
ENSG00000151136	BTBD11	266.177	-2.47496	0.459922	-5.43913	5.35418e-08	1.96956e-06	555.513	473.4	350.093	34.9909	99.6495	83.4177
ENSG00000162407	PPAP2B	1967.74	-2.46455	0.410705	-6.0553	1.40158e-09	6.7802e-08	4008.58	1971.28	4187.75	337.312	812.197	489.316
ENSG00000151892	GFRA1	473.704	-2.46433	0.421053	-5.86982	4.36277e-09	1.96514e-07	278.867	518.369	1679.64	34.9909	175.726	154.628
ENSG00000255967	RP11-438L7.3	16.5187	-2.46033	0.803538	-3.21125	0.00132159	0.0143514	12.2213	44.9689	38.7507	2.09945	1.0715	0
ENSG00000144648	ACKR2	92.75	-2.45496	0.543601	-4.55687	5.1922e-06	0.000120156	66.6615	165.159	253.884	7.698	40.717	22.3804
ENSG00000163739	CXCL1	406.808	-2.44088	0.45657	-5.17162	2.32067e-07	7.35225e-06	1952.07	156.165	6.68116	310.019	12.858	3.05187
ENSG00000106366	SERPINE1	49151.6	-2.43956	0.413221	-6.11144	9.87391e-10	4.97345e-08	73357.7	102465	70038.6	33007.6	9918.87	6122.05
ENSG00000163909	HEYL	263.718	-2.43495	0.607007	-4.74947	2.03955e-06	5.16267e-05	232.204	296.795	837.818	174.255	10.715	30.5187
ENSG00000113070	HBEGF	2276.87	-2.43009	0.391636	-6.47119	9.72372e-11	5.64776e-09	5560.68	3517.39	1992.32	2009.88	403.955	177.008
ENSG00000187017	ESPN	31.0867	-2.4288	0.722337	-3.17884	0.00147867	0.0156998	82.2159	78.4913	10.6899	3.49909	8.572	3.05187
ENSG00000164694	FNDC1	5887.24	-2.42682	0.272483	-8.8981	5.68117e-19	8.64762e-17	11319.1	6763.33	12019.4	1935.7	1407.95	1877.92
ENSG00000108821	COL1A1	811994	-2.42558	0.790285	-3.37236	0.000745256	0.00899453	2.15069e+06	885434	1.55078e+06	196067	36034.5	52958.1
ENSG00000132000	PODNL1	973.875	-2.42166	0.32525	-7.44189	9.92533e-14	8.42556e-12	2336.49	1701.46	946.053	434.587	210.014	214.648
ENSG00000162267	ITIH3	35.1804	-2.42004	0.735885	-3.42901	0.000605791	0.00763487	88.882	78.4913	26.7246	1.39964	6.429	9.15561
ENSG00000163453	IGFBP7	13428.1	-2.41964	0.416435	-5.96869	2.39168e-09	1.12313e-07	16437.6	19468.3	32041.5	7666.51	1695.11	3259.4
ENSG00000117069	ST6GALNAC5	190.592	-2.41494	0.507543	-5.02168	5.12205e-07	1.50233e-05	378.86	343.399	236.513	136.465	30.002	18.3112
ENSG00000135472	FAIM2	85.17	-2.4146	0.627087	-4.02359	5.73174e-05	0.00100903	201.096	112.014	137.632	4.89873	28.9305	26.4495
ENSG00000141750	STAC2	824.279	-2.4049	0.505877	-5.04762	4.47349e-07	1.34106e-05	756.608	1314.73	2140.64	488.473	81.434	163.784
ENSG00000151240	DIP2C	3767.45	-2.39724	0.312769	-7.65056	2.00102e-14	1.84985e-12	8532.67	4040.66	6734.61	1028.73	1035.07	1232.95
ENSG00000169508	GPR183	148.747	-2.39696	0.530887	-4.57391	4.78696e-06	0.000111361	499.961	183.964	94.8725	34.9909	67.5045	11.1902
ENSG00000221866	PLXNA4	778.073	-2.39374	0.441593	-5.52232	3.34552e-08	1.28978e-06	2103.17	1494.6	311.342	604.643	81.434	73.2448
ENSG00000183196	CHST6	787.653	-2.39113	0.440954	-5.55838	2.72293e-08	1.07319e-06	1414.34	986.864	1602.14	83.9782	356.809	281.789
ENSG00000116701	NCF2	73.4473	-2.38915	0.573725	-4.12658	3.68196e-05	0.000685062	147.766	180.693	58.7942	27.2929	13.9295	12.2075
ENSG00000112210	RAB23	702.395	-2.387	0.311955	-7.64802	2.04105e-14	1.87703e-12	1236.57	813.529	1527.31	235.839	146.795	254.322
ENSG00000179292	TMEM151A	61.297	-2.38071	0.680491	-3.64905	0.000263208	0.00377843	56.6623	156.983	116.252	15.396	2.143	20.3458
ENSG00000101425	BPI	46.6012	-2.37417	0.694538	-3.71424	0.000203816	0.00302418	19.9985	129.184	98.8812	0.699818	6.429	24.4149
ENSG00000157827	FMNL2	738.693	-2.37299	0.327019	-7.25484	4.02141e-13	3.21295e-11	1509.88	889.568	1360.28	293.224	196.084	183.112
ENSG00000181754	AMIGO1	128.223	-2.37285	0.540251	-4.4617	8.13106e-06	0.000179463	194.429	118.555	354.102	12.5967	42.86	46.7953
ENSG00000144229	THSD7B	24.0745	-2.3721	0.757127	-3.29268	0.000992377	0.0113634	65.5505	16.3523	50.7768	7.698	0	4.06916
ENSG00000105767	CADM4	463.922	-2.37005	0.381865	-6.22367	4.85671e-10	2.55223e-08	863.267	578.055	923.337	196.649	129.651	92.5733
ENSG00000184254	ALDH1A3	139.308	-2.36962	0.520367	-4.67067	3.00217e-06	7.33185e-05	457.742	165.976	97.545	53.886	53.575	7.12103
ENSG00000178026	FAM211B	476.714	-2.3687	0.365297	-6.50348	7.84824e-11	4.60387e-09	1281.01	578.873	566.563	217.643	70.719	145.472
ENSG00000172986	GXYLT2	1657.77	-2.36686	0.312743	-7.577	3.5364e-14	3.1378e-12	3030.88	2278.7	3093.38	380.701	506.819	656.152
ENSG00000134256	CD101	53.7314	-2.36422	0.609937	-3.86678	0.00011028	0.00179271	112.214	143.901	26.7246	13.9964	22.5015	3.05187
ENSG00000106333	PCOLCE	10262.3	-2.36335	0.284498	-8.33549	7.71794e-17	9.33395e-15	22582.7	14368.8	14520.8	5518.77	2351.94	2230.92
ENSG00000144452	ABCA12	14.5813	-2.3627	0.793462	-2.98725	0.00281496	0.0262427	41.1079	20.4404	21.3797	1.39964	2.143	1.01729
ENSG00000239218	RPS20P22	121.8	-2.35524	0.483752	-4.86531	1.14279e-06	3.09007e-05	276.645	249.373	101.554	55.9855	28.9305	18.3112
ENSG00000156049	GNA14	41.5626	-2.35162	0.654638	-3.4888	0.000485197	0.00636488	18.8874	98.9317	104.226	3.49909	8.572	15.2593
ENSG00000186340	THBS2	10090.1	-2.35161	0.280444	-8.41465	3.94073e-17	4.90011e-15	26295.7	12572.5	11653.3	5870.78	2470.88	1677.51
ENSG00000128567	PODXL	410.066	-2.35155	0.418977	-5.68869	1.28014e-08	5.369e-07	676.614	596.043	800.403	219.743	95.3635	72.2276
ENSG00000169427	KCNK9	11.7715	-2.35134	0.812722	-3.11127	0.00186287	0.0188598	23.3315	40.8809	5.34493	0	1.0715	0
ENSG00000143603	KCNN3	103.437	-2.34917	0.670129	-4.70239	2.57135e-06	6.34996e-05	205.54	152.077	163.02	93.7756	2.143	4.06916
ENSG00000132872	SYT4	12.7634	-2.33958	0.8125	-2.82749	0.00469145	0.0390004	65.5505	8.99379	1.33623	0.699818	0	0
ENSG00000197872	FAM49A	203.774	-2.33703	0.449612	-5.18627	2.14546e-07	6.81961e-06	496.628	311.512	240.522	46.188	72.862	54.9336
ENSG00000182107	TMEM30B	1055.23	-2.33071	0.309297	-7.55296	4.25484e-14	3.75639e-12	1853.19	1452.09	2003.01	354.108	213.228	455.746
ENSG00000148935	GAS2	1654.71	-2.32885	0.380443	-6.17995	6.41223e-10	3.30089e-08	2943.11	2056.31	3352.61	256.833	683.617	635.806
ENSG00000145794	MEGF10	1009.51	-2.32526	0.435544	-5.4539	4.92767e-08	1.83174e-06	1173.24	1325.36	2597.64	166.557	598.968	195.32
ENSG00000164932	CTHRC1	2974.27	-2.32199	0.485554	-5.30709	1.11391e-07	3.78966e-06	5049.61	6573.64	2597.64	3039.31	331.093	254.322
ENSG00000142149	HUNK	129.872	-2.31542	0.553302	-4.06279	4.84887e-05	0.000866563	452.187	153.712	84.1826	26.5931	30.002	32.5533
ENSG00000183160	TMEM119	2791	-2.31527	0.450418	-5.60239	2.11419e-08	8.5229e-07	5886.21	3522.3	3706.71	3020.42	362.167	248.219
ENSG00000160447	PKN3	694.519	-2.31338	0.394688	-5.85539	4.75888e-09	2.1381e-07	732.166	1685.93	1134.46	241.437	156.439	216.683
ENSG00000173698	GPR64	349.671	-2.31286	0.413066	-5.51847	3.41954e-08	1.31258e-06	1177.69	282.896	359.447	121.069	85.72	71.2103
ENSG00000196154	S100A4	380.016	-2.30677	0.459371	-5.09035	3.57398e-07	1.09749e-05	411.079	882.209	644.064	184.052	80.3625	78.3313
ENSG00000017483	SLC38A5	380.946	-2.29881	0.479025	-5.08339	3.70764e-07	1.13459e-05	792.161	753.843	316.687	333.113	47.146	42.7262
ENSG00000158528	PPP1R9A	64.8223	-2.28885	0.577203	-3.90572	9.39442e-05	0.001559	181.097	98.1141	60.1305	20.2947	16.0725	13.2248
ENSG00000213901	SLC23A3	91.69	-2.28857	0.519275	-4.35742	1.31604e-05	0.000276965	236.648	72.7679	165.693	31.4918	16.0725	27.4668
ENSG00000139269	INHBE	596.634	-2.27966	0.570356	-3.49374	0.000476305	0.00626685	304.421	121.825	2866.22	170.056	46.0745	71.2103
ENSG00000105737	GRIK5	228.155	-2.27711	0.45479	-5.09533	3.48126e-07	1.07088e-05	494.406	209.31	439.62	148.361	38.574	38.657
ENSG00000100036	SLC35E4	1030.05	-2.26732	0.318394	-7.09694	1.27548e-12	9.3838e-11	1552.1	2797.89	869.887	369.504	399.669	191.25
ENSG00000185760	KCNQ5	1132.12	-2.2638	0.433451	-5.3792	7.48178e-08	2.67102e-06	1764.31	1439.01	2418.58	175.654	728.62	266.53
ENSG00000165495	PKNOX2	463.941	-2.26259	0.346383	-6.5432	6.02168e-11	3.59205e-09	911.041	632.836	783.032	161.658	101.792	193.285
ENSG00000111799	COL12A1	86938.2	-2.2542	0.298859	-7.58479	3.33039e-14	3.00024e-12	175719	119510	133956	51620	18670.9	22153.5
ENSG00000259159	MFRP	13.9332	-2.25169	0.79563	-2.81627	0.0048585	0.0400497	38.8859	27.799	12.0261	2.79927	1.0715	1.01729
ENSG00000067191	CACNB1	1383.01	-2.25127	0.294151	-7.666	1.77445e-14	1.67548e-12	2665.35	1766.05	2462.68	579.45	291.448	533.06
ENSG00000104177	MYEF2	446.727	-2.24882	0.349102	-6.45466	1.08463e-10	6.23819e-09	1037.7	674.534	522.467	233.039	100.721	111.902
ENSG00000101096	NFATC2	7915.64	-2.24828	0.290016	-7.77746	7.39974e-15	7.25874e-13	16225.4	19579.5	3551.71	4382.96	3106.28	648.013
ENSG00000150394	CDH8	30.2858	-2.24812	0.741861	-2.98182	0.00286537	0.0266283	96.6592	9.81141	58.7942	2.09945	2.143	12.2075
ENSG00000171476	HOPX	536.456	-2.24311	0.429551	-5.34226	9.17967e-08	3.17815e-06	881.043	617.301	1161.19	359.007	96.435	103.764
ENSG00000197584	KCNMB2	84.9873	-2.24173	0.605013	-3.74007	0.000183969	0.00277636	77.7718	108.743	259.229	34.9909	13.9295	15.2593
ENSG00000135842	FAM129A	2335	-2.23558	0.337448	-6.57029	5.02188e-11	3.00581e-09	3695.27	1678.57	6538.19	794.994	519.677	783.313
ENSG00000168542	COL3A1	426933	-2.23119	0.774418	-3.12632	0.0017701	0.0180676	938554	446184	957230	148521	28476.2	42634.6
ENSG00000164692	COL1A2	526488	-2.21999	0.768923	-3.03432	0.00241078	0.0231964	1.20836e+06	590885	1.08008e+06	169744	49433.6	60423.9
ENSG00000159733	ZFYVE28	76.2614	-2.20548	0.608949	-3.67284	0.000239872	0.00348307	108.88	62.1389	225.823	8.39782	28.9305	23.3977
ENSG00000107159	CA9	1630.65	-2.20536	0.35859	-6.3505	2.14612e-10	1.18419e-08	3208.64	3832.17	843.163	798.493	1020.07	81.3832
ENSG00000187605	TET3	144.58	-2.20259	0.590388	-4.04948	5.13324e-05	0.000910931	255.536	147.171	328.713	20.2947	96.435	19.3285
ENSG00000111432	FZD10	88.5809	-2.20124	0.654556	-3.3153	0.000915461	0.0106695	156.655	288.619	25.3884	6.29836	32.145	22.3804
ENSG00000039560	RAI14	1339.55	-2.20025	0.288729	-7.62512	2.43816e-14	2.20772e-12	2785.34	1788.95	2073.83	610.242	335.379	443.538
ENSG00000248429	RP11-597D13.9	50.102	-2.19909	0.657833	-3.45897	0.000542245	0.00699885	99.9923	62.1389	98.8812	4.19891	16.0725	19.3285
ENSG00000102678	FGF9	137.412	-2.19646	0.636652	-4.11312	3.90346e-05	0.000721216	247.759	74.4032	372.809	95.8751	1.0715	32.5533
ENSG00000113083	LOX	13288.4	-2.19459	0.348142	-6.33635	2.35279e-10	1.2822e-08	24541.4	16730.1	24741.7	3980.57	6536.15	3200.39
ENSG00000105929	ATP6V0A4	106.246	-2.18867	0.63328	-3.62534	0.000288582	0.00409605	52.2182	385.098	121.597	39.1898	34.288	5.08645
ENSG00000138829	FBN2	27126.9	-2.18624	0.285193	-7.66375	1.8058e-14	1.69601e-12	42093.4	33319.5	59487.7	7237.52	9480.63	11142.4
ENSG00000187498	COL4A1	10940.1	-2.18396	0.276535	-7.90327	2.71683e-15	2.87252e-13	19420.7	13677.1	21049.7	5032.39	2813.76	3646.98
ENSG00000140511	HAPLN3	3815.52	-2.17721	0.325655	-6.71408	1.89261e-11	1.20642e-09	7169.45	4110.98	7535.01	2214.22	900.06	963.373
ENSG00000237115	RP1-131F15.2	26.6016	-2.17683	0.757491	-3.23329	0.00122372	0.0134876	37.7749	76.0384	28.0609	0.699818	15.001	2.03458
ENSG00000120708	TGFBI	4479.61	-2.16616	0.276232	-7.83602	4.65055e-15	4.83028e-13	10969.2	8108.31	3101.4	2528.44	1436.88	733.466
ENSG00000161791	FMNL3	1933.52	-2.16588	0.302863	-7.15784	8.1956e-13	6.13176e-11	3153.09	3476.51	2938.38	646.632	562.537	824.004
ENSG00000171680	PLEKHG5	1181.65	-2.16513	0.402695	-5.35868	8.38336e-08	2.93119e-06	3828.59	1255.04	919.328	459.081	184.298	443.538
ENSG00000167972	ABCA3	238.376	-2.16408	0.585002	-4.33079	1.48575e-05	0.000307549	276.645	275.537	616.003	213.445	16.0725	32.5533
ENSG00000102174	PHEX	105.419	-2.15666	0.595039	-3.66721	0.000245212	0.00355324	63.3284	197.046	280.609	18.1953	62.147	11.1902
ENSG00000107281	NPDC1	1316.04	-2.15659	0.397317	-5.59836	2.16389e-08	8.70338e-07	2516.47	1799.58	1985.64	1104.31	279.661	210.579
ENSG00000050165	DKK3	4676.4	-2.14876	0.274286	-7.82974	4.88863e-15	5.04787e-13	10713.6	4885.26	7520.32	2326.2	1218.3	1394.7
ENSG00000006118	TMEM132A	604.569	-2.14156	0.368612	-5.95036	2.6756e-09	1.23998e-07	1782.08	537.992	553.2	585.748	91.0775	77.314
ENSG00000162337	LRP5	3266.6	-2.14037	0.335658	-6.38576	1.70551e-10	9.52979e-09	6997.24	4460.1	4726.25	847.48	1124	1444.55
ENSG00000106025	TSPAN12	402.863	-2.13936	0.406375	-5.26189	1.42584e-07	4.7682e-06	942.149	468.495	605.313	99.3742	135.009	166.835
ENSG00000187616	TMEM8C	9.83212	-2.13796	0.810771	-2.92226	0.00347505	0.0307564	34.4418	17.17	6.68116	0.699818	0	0
ENSG00000197705	KLHL14	17.0878	-2.13764	0.800907	-2.91199	0.00359133	0.031564	21.1095	45.7866	29.3971	4.19891	0	2.03458
ENSG00000189056	RELN	174.671	-2.13665	0.551036	-3.80525	0.000141659	0.00222137	574.4	209.31	122.933	27.9927	69.6475	43.7434
ENSG00000009694	TENM1	91.3431	-2.13645	0.641579	-3.29069	0.00099943	0.0114368	303.31	128.366	50.7768	10.4973	23.573	31.536
ENSG00000235098	ANKRD65	63.0537	-2.13533	0.657736	-3.59335	0.000326448	0.00454426	82.2159	150.442	89.5276	2.09945	22.5015	31.536
ENSG00000244701	RP5-894A10.2	17.9061	-2.13516	0.782034	-2.87133	0.00408744	0.0350179	37.7749	24.5285	36.0783	0.699818	4.286	4.06916
ENSG00000158270	COLEC12	437.82	-2.13315	0.469133	-4.62199	3.80071e-06	9.03218e-05	612.175	1107.05	466.345	259.633	72.862	108.85
ENSG00000184985	SORCS2	904.241	-2.1327	0.309201	-6.92052	4.49992e-12	3.05596e-10	2259.83	756.296	1409.73	582.949	152.153	264.495
ENSG00000178860	MSC	208.941	-2.13233	0.57843	-4.12982	3.63047e-05	0.000677624	555.513	104.655	350.093	212.745	22.5015	8.13832
ENSG00000133116	KL	40.4846	-2.12902	0.73459	-3.22954	0.00123989	0.0136191	85.5489	46.6042	82.8464	0.699818	15.001	12.2075
ENSG00000106823	ECM2	1105.13	-2.1281	0.393878	-5.49187	3.97691e-08	1.50687e-06	1558.77	1844.54	1995	710.316	247.516	274.668
ENSG00000153904	DDAH1	1316.84	-2.12768	0.300104	-7.0872	1.36855e-12	1.00267e-10	2298.71	1723.54	2478.71	414.292	462.888	522.887
ENSG00000172985	SH3RF3	431.048	-2.12566	0.396173	-5.37905	7.48799e-08	2.67102e-06	911.041	595.225	634.71	101.474	160.725	183.112
ENSG00000147251	DOCK11	878.112	-2.11892	0.386336	-5.49667	3.87023e-08	1.47277e-06	1775.42	921.455	1667.62	208.546	378.239	317.394
ENSG00000198542	ITGBL1	9916.15	-2.11856	0.2937	-7.21932	5.22467e-13	4.06396e-11	16209.9	12950.2	19619.9	2636.92	3873.47	4206.49
ENSG00000136295	TTYH3	4534.63	-2.11833	0.289906	-7.27816	3.38401e-13	2.74089e-11	12945.7	5186.96	4481.72	2137.94	1241.87	1213.63
ENSG00000083857	FAT1	8451.07	-2.11792	0.287253	-7.39617	1.40171e-13	1.18421e-11	17793.1	12133.4	11327.2	4606.9	3023.77	1821.97
ENSG00000182010	RTKN2	45.3524	-2.11282	0.651486	-3.41591	0.000635694	0.00793809	104.436	44.1513	82.8464	27.2929	3.2145	10.1729
ENSG00000140859	KIFC3	2153.12	-2.10987	0.310684	-6.75153	1.46294e-11	9.39315e-10	5188.49	4161.67	1376.32	1067.92	687.903	436.417
ENSG00000198795	ZNF521	1120.66	-2.10898	0.304679	-6.91418	4.70568e-12	3.18346e-10	2259.83	1359.7	1912.15	403.795	363.238	425.227
ENSG00000112175	BMP5	809.682	-2.1074	0.396234	-5.26057	1.43609e-07	4.79338e-06	462.187	2064.48	1548.69	202.947	400.741	179.043
ENSG00000112208	BAG2	375.969	-2.10635	0.355424	-5.93307	2.97331e-09	1.36363e-07	522.182	576.42	753.635	123.868	99.6495	180.06
ENSG00000164061	BSN	186.31	-2.10549	0.55344	-4.31068	1.62756e-05	0.000332614	154.433	331.953	412.896	6.29836	154.296	57.9855
ENSG00000145949	MYLK4	41.3426	-2.10399	0.666902	-2.93743	0.00330949	0.0296477	182.208	13.8995	24.0522	19.5949	3.2145	5.08645
ENSG00000160097	FNDC5	90.6162	-2.10264	0.513362	-4.07324	4.63627e-05	0.000832783	257.758	102.202	97.545	45.4882	20.3585	20.3458
ENSG00000095713	CRTAC1	1291.27	-2.09858	0.464572	-4.63111	3.63711e-06	8.70196e-05	1144.36	2021.15	3243.04	786.596	282.876	269.582
ENSG00000126838	PZP	22.7082	-2.0982	0.809879	-2.96094	0.003067	0.0279866	27.7756	3.27047	100.217	0.699818	4.286	0
ENSG00000130032	PRRG3	26.1214	-2.09456	0.78948	-3.26957	0.00107709	0.0121522	67.7725	40.8809	34.742	0	2.143	11.1902
ENSG00000134871	COL4A2	18112.5	-2.09016	0.273837	-7.64224	2.13471e-14	1.95298e-12	35980.6	19982.6	32409	9833.85	4444.58	6024.39
ENSG00000099889	ARVCF	378.245	-2.08997	0.434435	-4.94343	7.67617e-07	2.14459e-05	683.281	597.678	549.192	273.629	57.861	107.833
ENSG00000179431	FJX1	508.666	-2.08754	0.344489	-6.11673	9.55148e-10	4.83239e-08	1493.22	647.553	315.351	413.593	124.294	57.9855
ENSG00000127507	EMR2	39.1834	-2.08744	0.683743	-3.11306	0.00185157	0.0187784	48.8851	55.598	100.217	16.7956	7.5005	6.10374
ENSG00000169994	MYO7B	15.8631	-2.08552	0.794885	-2.75334	0.00589898	0.0467287	26.6646	48.2394	13.3623	0.699818	2.143	4.06916
ENSG00000174600	CMKLR1	1731.25	-2.08392	0.425424	-5.10972	3.22641e-07	1.00297e-05	3136.42	2652.35	2496.08	1244.98	685.76	171.922
ENSG00000139318	DUSP6	496.783	-2.07138	0.394503	-5.30655	1.11723e-07	3.79363e-06	882.154	742.396	796.395	129.466	301.091	129.196
ENSG00000161944	ASGR2	60.7179	-2.07116	0.649702	-2.99701	0.00272641	0.0256589	137.767	161.071	20.0435	11.8969	19.287	14.2421
ENSG00000159374	M1AP	61.2067	-2.06768	0.647006	-3.59019	0.000330442	0.00459419	67.7725	119.372	117.588	2.79927	13.9295	45.778
ENSG00000230630	DNM3OS	321.318	-2.06654	0.368228	-5.61547	1.96028e-08	7.98286e-07	512.183	532.269	533.157	97.9746	141.438	110.885
ENSG00000119699	TGFB3	1366.27	-2.06617	0.326442	-6.40064	1.54725e-10	8.67296e-09	3184.2	2091.46	1252.05	1070.72	382.525	216.683
ENSG00000165209	STRBP	762.524	-2.06254	0.363087	-5.7057	1.15865e-08	4.92973e-07	1094.36	1613.98	1022.22	181.953	268.946	393.691
ENSG00000163359	COL6A3	20704.6	-2.06253	0.327971	-6.36496	1.95345e-10	1.08465e-08	45105.4	27517.7	26517.5	14585.6	7138.33	3363.16
ENSG00000205476	CCDC85C	145.428	-2.05848	0.451183	-4.52334	6.08704e-06	0.000138504	387.748	224.027	114.916	69.282	46.0745	30.5187
ENSG00000095752	IL11	3350.09	-2.05768	0.364215	-5.69562	1.22926e-08	5.19259e-07	5637.34	9685.49	1032.91	2363.29	1166.86	214.648
ENSG00000149970	CNKSR2	206.471	-2.05387	0.406439	-5.07234	3.92945e-07	1.19419e-05	231.093	507.74	271.255	46.188	129.651	52.8991
ENSG00000198732	SMOC1	1143.32	-2.05345	0.535754	-4.71316	2.43901e-06	6.06558e-05	1862.08	1944.29	1276.1	1583.69	90.006	103.764
ENSG00000130635	COL5A1	78048.7	-2.04927	0.317332	-6.44135	1.18415e-10	6.7447e-09	186520	81539.3	116843	28365.7	29858.4	25165.7
ENSG00000169306	IL1RAPL1	34.2502	-2.04563	0.696099	-3.16091	0.00157279	0.0164737	92.2151	33.5223	49.4406	23.094	2.143	5.08645
ENSG00000150054	MPP7	244.201	-2.04543	0.421569	-4.78807	1.68397e-06	4.35341e-05	299.977	199.499	728.247	77.6798	62.147	97.6598
ENSG00000146242	TPBG	1776.64	-2.0427	0.29577	-6.89781	5.28118e-12	3.54562e-10	3143.09	1979.45	3570.41	606.742	583.967	776.192
ENSG00000228582	TAP2	14.6035	-2.04262	0.803449	-2.89968	0.00373541	0.032496	55.5513	0	32.0696	0	0	0
ENSG00000188487	INSC	237.107	-2.03857	0.627316	-4.31639	1.58599e-05	0.000325625	305.532	457.866	356.774	269.43	9.6435	23.3977
ENSG00000139364	TMEM132B	148.581	-2.03817	0.63712	-4.16472	3.1174e-05	0.000594427	135.545	185.599	396.861	4.19891	148.938	20.3458
ENSG00000138696	BMPR1B	416.853	-2.0365	0.413955	-4.94262	7.70788e-07	2.15005e-05	303.31	694.975	1046.27	70.6816	267.875	118.006
ENSG00000179772	FOXS1	55.6889	-2.03592	0.691831	-2.96835	0.002994	0.0274624	113.325	152.894	24.0522	31.4918	3.2145	9.15561
ENSG00000120820	GLT8D2	1860.85	-2.03538	0.282235	-7.21419	5.42572e-13	4.20184e-11	3394.18	3059.52	2589.62	874.773	639.685	607.322
ENSG00000187151	ANGPTL5	1212.42	-2.03003	0.42347	-4.71428	2.42566e-06	6.04087e-05	848.823	1526.49	3762.83	405.895	403.955	326.55
ENSG00000128849	CGNL1	437.602	-2.02367	0.445283	-4.45696	8.31295e-06	0.000183062	594.399	265.726	1353.6	195.249	99.6495	116.988
ENSG00000231784	DBIL5P	45.7159	-2.0205	0.627963	-3.15187	0.00162227	0.0168398	39.9969	53.1451	141.641	8.39782	11.7865	19.3285
ENSG00000272781	MDGA2	43.9858	-2.02029	0.742451	-3.2561	0.00112954	0.0126711	57.7733	72.7679	98.8812	0	18.2155	16.2766
ENSG00000053328	METTL24	14.0961	-2.01891	0.799377	-2.73983	0.00614718	0.0482618	18.8874	29.4342	29.3971	0.699818	1.0715	5.08645
ENSG00000212864	RNF208	41.8866	-2.01872	0.639134	-3.12705	0.00176571	0.0180423	94.4372	42.5161	77.5015	13.9964	9.6435	13.2248
ENSG00000168056	LTBP3	10393	-2.01746	0.271118	-7.455	8.98645e-14	7.74018e-12	25382.5	11350.2	13340.9	6831.63	2815.9	2636.81
ENSG00000249577	CTD-2195M15.1	9.0617	-2.01733	0.808922	-2.83845	0.00453333	0.037936	14.4433	24.5285	14.6986	0.699818	0	0
ENSG00000104219	ZDHHC2	290.194	-2.01646	0.400503	-4.99949	5.74811e-07	1.66112e-05	605.509	232.203	598.632	130.866	80.3625	93.5906
ENSG00000176658	MYO1D	5777.04	-2.00028	0.275686	-7.25122	4.13019e-13	3.28499e-11	7127.23	8861.34	12044.8	1795.73	2452.66	2380.46
ENSG00000231834	HLA-A	71.869	-1.9974	0.703641	-3.48742	0.000487706	0.00639304	187.763	125.095	54.7855	12.5967	2.143	48.8299
ENSG00000197594	ENPP1	6597.74	-1.99607	0.364697	-5.45103	5.00785e-08	1.84987e-06	14023.4	14049.9	4294.65	1570.39	3943.12	1704.98
ENSG00000131620	ANO1	208.747	-1.99368	0.500828	-4.34237	1.40953e-05	0.000294533	629.951	152.894	180.391	247.036	30.002	12.2075
ENSG00000122877	EGR2	1880.38	-1.99041	0.361969	-5.39205	6.96577e-08	2.52038e-06	1836.52	1089.07	6575.6	455.582	461.816	863.679
ENSG00000116991	SIPA1L2	498.062	-1.98818	0.332868	-5.96125	2.50313e-09	1.16925e-07	1038.81	967.241	418.241	214.144	241.087	108.85
ENSG00000114861	FOXP1	691.302	-1.98781	0.333115	-5.97517	2.29846e-09	1.08224e-07	1333.23	726.862	1285.46	393.998	187.512	220.752
ENSG00000112759	SLC29A1	3529.55	-1.98749	0.287067	-6.92425	4.38306e-12	2.9881e-10	5431.8	4814.13	6828.15	1128.81	1505.46	1468.97
ENSG00000140470	ADAMTS17	153.809	-1.9858	0.497871	-4.21559	2.49122e-05	0.00048875	379.971	184.781	160.348	150.461	30.002	17.2939
ENSG00000129038	LOXL1	1689.23	-1.98554	0.326335	-6.15069	7.71453e-10	3.91424e-08	3821.93	2228.01	1930.86	1370.94	368.596	415.054
ENSG00000236609	ZNF853	582.111	-1.9818	0.348027	-5.68179	1.33294e-08	5.5772e-07	885.487	654.911	1301.49	252.634	188.584	209.562
ENSG00000105650	PDE4C	129.944	-1.98093	0.646234	-3.3188	0.000904059	0.0105575	195.54	407.991	53.4493	3.49909	83.577	35.6051
ENSG00000081277	PKP1	265.063	-1.97992	0.421412	-4.67218	2.98023e-06	7.30843e-05	647.728	383.462	276.6	87.4773	96.435	98.6771
ENSG00000090006	LTBP4	8153.97	-1.97971	0.274405	-7.20142	5.959e-13	4.53526e-11	20863.9	9280.77	9493.93	4252.8	2269.44	2762.96
ENSG00000165124	SVEP1	543.251	-1.9762	0.37822	-5.21011	1.88728e-07	6.08098e-06	1306.57	720.321	636.047	179.153	187.512	229.907
ENSG00000122420	PTGFR	172.176	-1.97056	0.498036	-3.96857	7.23048e-05	0.00124574	377.749	165.159	308.67	36.3905	72.862	72.2276
ENSG00000164574	GALNT10	4051.29	-1.96697	0.286987	-6.85454	7.15426e-12	4.71354e-10	7336.1	5256.46	6949.74	1824.43	1609.39	1331.63
ENSG00000167604	NFKBID	186.727	-1.96696	0.528294	-3.59433	0.000325225	0.00453846	333.308	540.445	69.4841	107.072	37.5025	32.5533
ENSG00000205795	CYS1	607.009	-1.96604	0.36046	-5.46339	4.6713e-08	1.74379e-06	1236.57	869.945	833.809	197.349	197.156	307.221
ENSG00000187699	C2orf88	38.7813	-1.96556	0.709311	-2.77514	0.00551784	0.0441852	59.9954	20.4404	122.933	4.19891	13.9295	11.1902
ENSG00000143869	GDF7	45.1339	-1.96544	0.679274	-3.06172	0.00220067	0.0215395	106.658	27.799	93.5363	4.89873	5.3575	32.5533
ENSG00000069535	MAOB	565.735	-1.95757	0.353984	-5.51759	3.43674e-08	1.31632e-06	469.964	905.102	1377.66	123.168	295.734	222.786
ENSG00000128645	HOXD1	9.04578	-1.95728	0.808989	-2.83521	0.00457949	0.0382498	19.9985	17.17	16.0348	0	1.0715	0
ENSG00000152078	TMEM56	351.828	-1.95687	0.382002	-5.10247	3.3525e-07	1.04034e-05	387.748	459.501	873.896	99.3742	151.081	139.369
ENSG00000197457	STMN3	322.956	-1.95628	0.516002	-4.23734	2.26186e-05	0.00044723	568.845	584.596	322.032	378.602	45.003	38.657
ENSG00000088387	DOCK9	358.1	-1.95421	0.40397	-4.84061	1.29442e-06	3.4421e-05	731.055	407.991	605.313	109.871	168.225	126.144
ENSG00000166257	SCN3B	79.7014	-1.95071	0.643179	-3.31559	0.000914483	0.0106651	152.21	120.19	124.27	4.19891	40.717	36.6224
ENSG00000125378	BMP4	246.812	-1.95056	0.385387	-5.0725	3.92623e-07	1.19419e-05	339.974	277.99	574.58	83.9782	57.861	146.49
ENSG00000156466	GDF6	64.1191	-1.94993	0.634453	-2.9768	0.00291275	0.0269834	173.32	122.643	33.4058	14.6962	19.287	21.3631
ENSG00000107679	PLEKHA1	1327.31	-1.94981	0.293118	-6.65128	2.90557e-11	1.78138e-09	2077.62	1935.3	2375.82	483.574	562.537	528.991
ENSG00000102362	SYTL4	1790.97	-1.94273	0.309524	-6.26819	3.65275e-10	1.96039e-08	2072.06	3749.59	2838.16	726.411	733.977	625.633
ENSG00000117479	SLC19A2	988.948	-1.94168	0.360594	-5.39255	6.94665e-08	2.51862e-06	1875.41	1786.49	1121.1	298.822	369.667	482.195
ENSG00000099377	HSD3B7	140.888	-1.94109	0.485746	-4.11083	3.94235e-05	0.000726562	304.421	221.574	146.986	114.77	32.145	25.4322
ENSG00000115896	PLCL1	127.99	-1.93983	0.539155	-3.64809	0.000264193	0.00378948	138.878	143.901	351.429	73.4809	24.6445	35.6051
ENSG00000134013	LOXL2	10073.6	-1.93794	0.31314	-6.2288	4.70022e-10	2.48478e-08	14257.8	18156.8	15353.3	3516.59	6663.66	2493.38
ENSG00000235436	DPY19L2P4	53.5269	-1.9361	0.631898	-3.2447	0.00117574	0.0130896	63.3284	97.2965	104.226	4.19891	24.6445	27.4668
ENSG00000158715	SLC45A3	222.045	-1.93564	0.43579	-4.44563	8.76361e-06	0.000191746	473.297	327.865	280.609	66.4827	78.2195	105.798
ENSG00000153714	LURAP1L	277.327	-1.92722	0.417308	-4.54116	5.59445e-06	0.000128121	126.657	217.486	1040.93	29.3924	85.72	163.784
ENSG00000133056	PIK3C2B	240.318	-1.92153	0.426746	-4.41615	1.00473e-05	0.000216347	691.058	134.089	367.464	104.273	51.432	93.5906
ENSG00000180672	AC007362.1	239.717	-1.91897	0.532122	-4.17991	2.91619e-05	0.000564596	506.628	308.242	249.875	323.316	27.859	22.3804
ENSG00000214357	NEURL1B	231.793	-1.91852	0.438863	-4.44763	8.68242e-06	0.000190205	502.183	294.342	314.015	130.866	36.431	112.919
ENSG00000140398	NEIL1	296.235	-1.91759	0.480974	-3.94421	8.00651e-05	0.00136064	745.498	554.344	168.365	141.363	60.004	107.833
ENSG00000167100	SAMD14	203.072	-1.91347	0.463587	-4.02415	5.71806e-05	0.00100762	618.841	122.643	273.928	81.1789	55.718	66.1238
ENSG00000184828	ZBTB7C	54.4142	-1.90977	0.594222	-3.18436	0.00145076	0.0154874	131.101	49.8747	90.8638	24.4936	12.858	17.2939
ENSG00000240053	LY6G5B	221.132	-1.90778	0.608609	-3.54643	0.000390493	0.00529565	542.18	250.191	281.945	13.2965	183.226	55.9509
ENSG00000091622	PITPNM3	1004.17	-1.90349	0.434326	-4.47363	7.6902e-06	0.000171231	1032.14	1084.98	2711.22	684.422	172.511	339.775
ENSG00000129465	RIPK3	44.6462	-1.90217	0.648869	-3.01334	0.0025839	0.0245686	73.3277	84.2146	65.4754	6.29836	18.2155	20.3458
ENSG00000138944	KIAA1644	159.676	-1.89696	0.519252	-3.92248	8.76406e-05	0.00147238	368.86	236.291	134.959	172.155	20.3585	25.4322
ENSG00000127220	ABHD8	271.444	-1.89313	0.473928	-4.09395	4.24086e-05	0.000773563	446.632	294.342	561.218	39.8896	135.009	151.576
ENSG00000005059	CCDC109B	345.459	-1.88781	0.474116	-4.28518	1.82589e-05	0.000369723	642.173	618.936	334.058	310.719	141.438	25.4322
ENSG00000150630	VEGFC	72.3319	-1.88754	0.626433	-2.85037	0.00436678	0.0369096	182.208	161.888	24.0522	35.6907	12.858	17.2939
ENSG00000188158	NHS	132.183	-1.88541	0.687014	-3.29612	0.000980313	0.0112617	349.973	246.92	70.8203	4.89873	28.9305	91.5561
ENSG00000197971	MBP	350.71	-1.88331	0.362363	-5.1714	2.32347e-07	7.35225e-06	293.311	865.857	534.493	94.4755	196.084	120.04
ENSG00000241674	HLA-DMB	59.446	-1.88323	0.693842	-3.34969	0.000809022	0.00960939	96.6592	162.706	36.0783	44.0886	17.144	0
ENSG00000167123	CERCAM	2980.17	-1.88243	0.285307	-6.61495	3.71666e-11	2.25516e-09	5549.57	5080.67	3468.86	1459.12	1594.39	728.379
ENSG00000006611	USH1C	1908.16	-1.87806	0.324843	-5.77055	7.90137e-09	3.47051e-07	3060.87	2060.4	4046.11	826.485	771.48	683.619
ENSG00000185567	AHNAK2	4005.58	-1.87136	0.353853	-5.35409	8.59863e-08	2.99459e-06	5891.77	7307.05	5586.79	2928.04	1314.73	1005.08
ENSG00000108947	EFNB3	122.984	-1.86893	0.503965	-3.83147	0.00012738	0.00202991	225.538	255.097	105.562	88.1771	49.289	14.2421
ENSG00000147027	TMEM47	4762.18	-1.8674	0.355515	-5.20132	1.97882e-07	6.3412e-06	5126.27	3846.89	14355.1	1248.48	1877.27	2119.01
ENSG00000115267	IFIH1	32.3045	-1.86481	0.77129	-2.77803	0.005469	0.0438738	59.9954	31.0695	78.8377	17.4955	6.429	0
ENSG00000064692	SNCAIP	205.243	-1.86271	0.460385	-4.24203	2.21503e-05	0.000439447	502.183	161.888	288.626	190.351	18.2155	70.193
ENSG00000101134	DOK5	165.054	-1.86114	0.482611	-3.93073	8.46872e-05	0.00142866	204.429	201.951	384.835	26.5931	92.149	80.3659
ENSG00000102452	NALCN	703.625	-1.85958	0.466722	-4.2466	2.17044e-05	0.000432611	803.271	802.083	1683.65	56.6853	445.744	430.313
ENSG00000138449	SLC40A1	1104.49	-1.85859	0.413239	-4.55246	5.30231e-06	0.000122383	2152.06	1152.84	1961.59	266.631	687.903	405.899
ENSG00000129194	SOX15	45.5768	-1.85625	0.68139	-2.97498	0.00293009	0.0270486	74.4387	62.1389	89.5276	2.79927	16.0725	28.4841
ENSG00000176788	BASP1	2063.54	-1.85614	0.388207	-4.90399	9.39073e-07	2.57472e-05	4110.79	2642.54	2745.96	1899.31	400.741	581.89
ENSG00000146555	SDK1	302.071	-1.85083	0.588235	-3.51669	0.000436956	0.00584052	611.064	328.682	514.449	14.6962	195.013	148.524
ENSG00000112561	TFEB	239.349	-1.85038	0.404817	-4.5917	4.39651e-06	0.000102957	363.305	348.305	428.931	122.468	63.2185	109.867
ENSG00000029153	ARNTL2	73.9031	-1.83975	0.540954	-3.39637	0.00068285	0.00840214	89.993	103.02	167.029	18.8951	27.859	36.6224
ENSG00000121858	TNFSF10	71.7541	-1.83611	0.569847	-3.23561	0.00121385	0.0134208	122.213	72.7679	156.339	40.5895	19.287	19.3285
ENSG00000132003	ZSWIM4	543.506	-1.83462	0.417929	-4.42574	9.61121e-06	0.000207717	1182.13	984.411	412.896	406.594	107.15	167.853
ENSG00000198768	APCDD1L	391.405	-1.83459	0.441208	-4.26486	2.00029e-05	0.000400898	491.073	1005.67	354.102	284.126	157.51	55.9509
ENSG00000128203	ASPHD2	241.08	-1.83189	0.446751	-4.08204	4.46429e-05	0.000807644	312.198	261.638	594.623	114.77	90.006	73.2448
ENSG00000111261	MANSC1	133.322	-1.82768	0.541654	-3.61449	0.000300936	0.00425771	149.988	196.228	283.281	11.1971	91.0775	68.1584
ENSG00000176734	TRIL	45.7548	-1.82576	0.652282	-3.01103	0.00260361	0.0247427	99.9923	85.8498	37.4145	34.2911	13.9295	3.05187
ENSG00000215788	TNFRSF25	600.126	-1.82439	0.480946	-3.71958	0.000199553	0.00297092	1952.07	708.057	323.368	198.049	142.509	276.703
ENSG00000166289	PLEKHF1	187.63	-1.82386	0.523994	-3.43041	0.000602659	0.00760082	549.958	247.738	130.951	51.7866	57.861	87.4869
ENSG00000270580	RP11-1186N24.5	150.949	-1.82367	0.651543	-3.34508	0.000822584	0.00974789	258.869	266.543	205.78	2.79927	76.0765	95.6252
ENSG00000185633	NDUFA4L2	6911.55	-1.82083	0.265744	-6.8677	6.52434e-12	4.34718e-10	7646.08	20376.7	4258.57	1979.09	6100.05	1108.85
ENSG00000257093	KIAA1147	552.512	-1.81937	0.331225	-5.48976	4.02491e-08	1.52179e-06	1205.46	510.193	901.957	343.611	157.51	196.337
ENSG00000149489	ROM1	138.954	-1.81753	0.454527	-3.98305	6.80367e-05	0.00117661	221.094	133.272	314.015	46.188	42.86	76.2967
ENSG00000102221	JADE3	103.681	-1.81343	0.523071	-3.52576	0.000422277	0.00566146	142.211	134.089	221.815	60.8842	20.3585	42.7262
ENSG00000111674	ENO2	1506.74	-1.81177	0.329093	-5.54686	2.90846e-08	1.13869e-06	3296.41	2016.24	1727.75	918.861	780.052	301.118
ENSG00000145147	SLIT2	870.293	-1.81082	0.335055	-5.37794	7.5341e-08	2.67868e-06	1710.98	664.723	1781.2	481.475	250.731	332.654
ENSG00000108515	ENO3	132.889	-1.80926	0.481148	-3.79375	0.000148389	0.00231352	221.094	200.316	212.461	32.1916	61.0755	70.193
ENSG00000205644	CTD-2375G15.1	8.37446	-1.80629	0.794577	-2.91738	0.00352987	0.0311479	13.3323	15.5347	21.3797	0	0	0
ENSG00000124479	NDP	90.0109	-1.80556	0.66633	-2.84886	0.00438767	0.0370369	78.8828	275.537	98.8812	53.886	6.429	26.4495
ENSG00000196597	ZNF782	81.2264	-1.80452	0.587814	-3.27883	0.00104239	0.0118211	37.7749	215.851	134.959	4.89873	25.716	68.1584
ENSG00000101333	PLCB4	825.596	-1.80243	0.448232	-4.266	1.99009e-05	0.00039976	1331.01	1293.47	1099.72	878.972	129.651	220.752
ENSG00000075711	DLG1	2480.93	-1.79991	0.311749	-5.76162	8.33099e-09	3.63211e-07	2939.77	3311.35	5525.32	946.154	1150.79	1012.2
ENSG00000106511	MEOX2	347.532	-1.79981	0.367184	-4.95294	7.30993e-07	2.05201e-05	226.649	229.75	1158.51	46.8878	64.29	359.103
ENSG00000106034	CPED1	258.1	-1.79811	0.429273	-4.34732	1.3781e-05	0.000288992	651.061	225.662	293.971	284.126	43.9315	49.8472
ENSG00000157554	ERG	2959.85	-1.79784	0.361321	-5.02249	5.10069e-07	1.49855e-05	4567.42	4016.14	5267.43	1772.64	1451.88	683.619
ENSG00000255168	RP11-458D21.5	87.2139	-1.79777	0.69362	-3.10454	0.00190575	0.0191846	94.4372	44.1513	300.652	1.39964	45.003	37.6397
ENSG00000177409	SAMD9L	432.479	-1.79746	0.490548	-3.82699	0.000129722	0.00206058	485.518	393.274	1169.2	62.2838	328.95	155.645
ENSG00000089692	LAG3	131.945	-1.79614	0.496203	-3.64009	0.000272545	0.00389347	226.649	268.178	137.632	81.1789	34.288	43.7434
ENSG00000110660	SLC35F2	664.513	-1.79386	0.320833	-5.5884	2.29165e-08	9.19631e-07	1119.91	818.435	1195.93	255.434	265.732	331.636
ENSG00000263303	LAIR1	34.4744	-1.79224	0.678406	-2.75047	0.00595091	0.0469715	91.1041	37.6104	41.4232	25.1935	6.429	5.08645
ENSG00000082781	ITGB5	5246.65	-1.78979	0.277777	-6.43723	1.21676e-10	6.90815e-09	9912.57	5966.97	8829.82	2599.82	2047.64	2123.08
ENSG00000010404	IDS	4586.17	-1.78473	0.293384	-6.09137	1.11948e-09	5.55245e-08	6481.72	6678.3	8314.04	1582.99	2557.67	1902.33
ENSG00000125726	CD70	85.0971	-1.78459	0.683281	-3.19983	0.00137508	0.0148097	57.7733	242.832	117.588	73.4809	11.7865	7.12103
ENSG00000160013	PTGIR	88.7231	-1.78067	0.576948	-3.16003	0.00157753	0.0165014	149.988	101.385	177.719	48.2875	40.717	14.2421
ENSG00000095303	PTGS1	215.721	-1.77837	0.446411	-3.91756	8.94503e-05	0.00149863	644.395	210.128	196.426	94.4755	87.863	61.0374
ENSG00000122641	INHBA	4551.62	-1.77827	0.357567	-5.0679	4.02234e-07	1.21614e-05	8681.55	8323.34	3705.37	4426.35	1269.73	903.353
ENSG00000215616	AC002321.2	542.753	-1.77786	0.806541	-3.07942	0.00207402	0.0205967	1692.09	1153.66	299.316	95.1753	0	16.2766
ENSG00000130037	KCNA5	318.958	-1.777	0.398468	-4.50046	6.78075e-06	0.000152909	472.186	461.136	561.218	185.452	76.0765	157.68
ENSG00000189423	USP32P3	60.9013	-1.77316	0.675746	-2.96128	0.00306367	0.0279706	118.88	92.3907	85.5189	3.49909	20.3585	44.7607
ENSG00000176383	B3GNT4	40.272	-1.77155	0.69985	-2.85882	0.00425215	0.036131	28.8867	120.19	50.7768	1.39964	13.9295	26.4495
ENSG00000212664	RP11-592N21.1	54.6581	-1.77062	0.746477	-2.98409	0.0028442	0.0264734	59.9954	36.7928	183.064	0	25.716	22.3804
ENSG00000140937	CDH11	5461.39	-1.77037	0.330769	-5.37157	7.80532e-08	2.74539e-06	9614.81	6152.57	9761.18	3419.31	2283.37	1537.12
ENSG00000182575	NXPH3	162.544	-1.76777	0.59658	-2.94349	0.00324531	0.0291808	544.402	139.813	126.942	24.4936	45.003	94.6079
ENSG00000154319	FAM167A	16.2979	-1.76533	0.812737	-2.90083	0.00372173	0.0324197	69.9946	13.0819	9.35363	0	5.3575	0
ENSG00000183114	FAM43B	305.076	-1.76527	0.367291	-4.80423	1.55345e-06	4.05758e-05	412.19	479.941	545.183	132.965	115.722	144.455
ENSG00000164707	SLC13A4	105.375	-1.76453	0.528513	-3.44151	0.000578483	0.0073417	219.983	150.442	126.942	79.0795	17.144	38.657
ENSG00000234465	PINLYP	73.7156	-1.76271	0.713861	-2.94408	0.00323914	0.0291513	106.658	175.788	84.1826	21.6944	1.0715	52.8991
ENSG00000156113	KCNMA1	5297.63	-1.76256	0.27821	-6.34223	2.26456e-10	1.24178e-08	8363.8	9645.43	6681.16	2946.93	2451.59	1696.84
ENSG00000120149	MSX2	739.775	-1.75944	0.405148	-4.41309	1.01904e-05	0.000218453	1111.03	933.719	1392.35	554.256	275.375	171.922
ENSG00000158106	RHPN1	151.711	-1.75538	0.440994	-3.98708	6.68904e-05	0.00116248	212.206	221.574	283.281	46.188	70.719	76.2967
ENSG00000123610	TNFAIP6	263.726	-1.75524	0.532443	-3.95749	7.57424e-05	0.00129466	735.499	164.341	215.133	426.189	30.002	11.1902
ENSG00000126603	GLIS2	1788.71	-1.75268	0.319179	-5.51903	3.40874e-08	1.31129e-06	2759.79	2022.79	3511.62	1174.99	454.316	808.745
ENSG00000153266	FEZF2	17.6062	-1.74996	0.803344	-2.99687	0.00272763	0.0256589	45.552	58.0508	0	0	0	2.03458
ENSG00000165338	HECTD2	1981.24	-1.74705	0.28031	-6.23476	4.52474e-10	2.40643e-08	3530.84	3123.3	2574.92	965.749	1002.92	689.722
ENSG00000261373	VPS9D1-AS1	102.386	-1.74657	0.507124	-3.44356	0.000574113	0.00729814	204.429	136.542	148.322	34.9909	50.3605	39.6743
ENSG00000147394	ZNF185	1307.98	-1.74485	0.292442	-5.95694	2.57003e-09	1.19734e-07	2646.46	1093.15	2389.18	655.73	347.166	716.172
ENSG00000135083	CCNJL	192.102	-1.74327	0.539461	-3.25875	0.00111906	0.0125615	541.069	145.536	240.522	37.7902	50.3605	137.334
ENSG00000250909	RP11-843P14.2	8.01642	-1.74244	0.791224	-2.84755	0.00440574	0.0371072	12.2213	17.17	18.7073	0	0	0
ENSG00000230726	HLA-DRA	275.848	-1.73781	0.478154	-3.49784	0.000469051	0.00619448	442.188	784.913	128.278	114.77	96.435	88.5042
ENSG00000047365	ARAP2	167.166	-1.73773	0.524897	-3.16549	0.00154823	0.0162914	141.1	589.502	102.89	41.2893	61.0755	67.1411
ENSG00000177119	ANO6	1819.95	-1.73589	0.301232	-5.75286	8.7746e-09	3.79469e-07	3234.19	1969.64	3324.55	808.29	766.122	816.883
ENSG00000065413	ANKRD44	315.808	-1.73548	0.421489	-4.1512	3.30735e-05	0.000623243	439.966	290.254	749.626	64.3833	133.937	216.683
ENSG00000258225	RP11-136F16.1	145.018	-1.73534	0.523689	-3.17016	0.00152356	0.0161087	104.436	556.797	60.1305	20.2947	85.72	42.7262
ENSG00000164684	ZNF704	2491.85	-1.73497	0.346815	-5.04641	4.50188e-07	1.34728e-05	3008.66	3550.09	4968.11	1372.34	563.609	1488.29
ENSG00000134775	FHOD3	276.888	-1.73401	0.440614	-4.10893	3.975e-05	0.00073035	711.056	329.5	197.762	328.215	43.9315	50.8645
ENSG00000144749	LRIG1	2119.09	-1.73144	0.303199	-5.71267	1.11216e-08	4.74332e-07	3598.61	2675.24	3599.81	771.9	1021.14	1047.81
ENSG00000148948	LRRC4C	166.649	-1.73141	0.450317	-3.88939	0.000100496	0.00165346	308.865	188.87	280.609	122.468	48.2175	50.8645
ENSG00000144152	FBLN7	746.698	-1.73111	0.356323	-4.82927	1.37036e-06	3.62221e-05	628.84	1398.13	1509.94	299.522	297.877	345.878
ENSG00000181135	ZNF707	41.0758	-1.73064	0.787195	-4.1374	3.5127e-05	0.000659125	43.33	88.3027	76.1652	0	0	38.657
ENSG00000129467	ADCY4	375.888	-1.72761	0.405778	-4.43653	9.14219e-06	0.000198309	1065.47	305.789	291.299	472.377	47.146	73.2448
ENSG00000113805	CNTN3	245.747	-1.72622	0.487494	-3.7599	0.000169979	0.00259405	442.188	485.665	175.046	46.8878	285.019	39.6743
ENSG00000164983	TMEM65	781.875	-1.72474	0.319861	-5.38669	7.17681e-08	2.58087e-06	1016.59	1068.63	1570.07	369.504	304.306	362.155
ENSG00000104450	SPAG1	132.771	-1.72413	0.47949	-3.59819	0.000320441	0.00448693	255.536	152.077	221.815	41.2893	55.718	70.193
ENSG00000082482	KCNK2	174.462	-1.72263	0.499366	-3.65915	0.000253053	0.00365045	326.641	233.839	229.832	181.953	45.003	29.5014
ENSG00000145431	PDGFC	1294.64	-1.72146	0.307036	-5.61672	1.94613e-08	7.95437e-07	1999.85	2046.5	1953.57	757.203	473.603	537.129
ENSG00000102007	PLP2	2276.57	-1.7195	0.281677	-6.10939	1.0001e-09	5.00251e-08	3436.4	3943.37	3166.87	1140.7	1177.58	794.503
ENSG00000074855	ANO8	456.512	-1.71626	0.34495	-4.99185	5.98042e-07	1.71981e-05	837.713	599.313	677.47	300.922	163.939	159.714
ENSG00000123146	CD97	614.995	-1.71581	0.474751	-3.82122	0.000132794	0.00210367	1001.03	478.306	1297.48	678.824	127.508	106.815
ENSG00000094916	CBX5	3987.88	-1.71481	0.327915	-5.18675	2.13993e-07	6.81961e-06	2838.67	9033.04	7033.93	1411.53	2026.21	1583.92
ENSG00000144485	HES6	589.319	-1.71415	0.412864	-4.1383	3.49883e-05	0.000657222	594.399	660.635	1546.02	335.913	184.298	214.648
ENSG00000019582	CD74	2250.39	-1.71226	0.357094	-4.71502	2.41691e-06	6.0276e-05	4131.9	5451.87	1203.95	1140.7	927.919	645.979
ENSG00000073711	PPP2R3A	414.285	-1.71087	0.380694	-4.49322	7.01532e-06	0.000157997	667.726	830.699	442.293	133.665	207.871	203.458
ENSG00000161921	CXCL16	116.308	-1.70921	0.501593	-3.44804	0.000564676	0.00720175	194.429	233.839	118.925	82.5786	38.574	29.5014
ENSG00000139508	SLC46A3	124.832	-1.70568	0.580693	-3.19584	0.00139424	0.0150019	225.538	192.958	163.02	14.6962	43.9315	108.85
ENSG00000132510	KDM6B	15793.7	-1.7047	0.362721	-4.59979	4.2292e-06	9.9833e-05	46127.5	25836.7	3406.06	6348.75	11670.8	1372.32
ENSG00000111664	GNB3	201.952	-1.70286	0.522637	-3.2766	0.00105066	0.0118997	517.738	241.197	208.452	41.2893	92.149	110.885
ENSG00000133878	DUSP26	87.7132	-1.70065	0.634753	-3.0325	0.00242536	0.0232743	127.768	105.473	181.728	4.19891	46.0745	61.0374
ENSG00000135622	SEMA4F	451.915	-1.69651	0.401049	-4.20227	2.64253e-05	0.000516197	1152.13	471.765	518.458	179.153	228.229	161.749
ENSG00000007062	PROM1	220.771	-1.69633	0.440495	-3.81113	0.000138331	0.00217887	909.93	67.0446	80.1739	221.143	31.0735	15.2593
ENSG00000135362	PRR5L	106.673	-1.6901	0.485792	-3.47679	0.000507447	0.00659793	154.433	254.279	93.5363	36.3905	73.9335	27.4668
ENSG00000162894	FAIM3	67.6474	-1.6894	0.56727	-3.05015	0.00228724	0.0222022	143.322	104.655	70.8203	52.4864	20.3585	14.2421
ENSG00000163485	ADORA1	109.081	-1.68814	0.639715	-3.06409	0.00218332	0.0214153	85.5489	262.455	168.365	103.573	19.287	15.2593
ENSG00000130294	KIF1A	897.992	-1.68713	0.381954	-4.34564	1.3887e-05	0.00029087	2240.94	528.181	1520.63	451.383	318.235	328.585
ENSG00000126785	RHOJ	1315.42	-1.68469	0.292628	-5.75457	8.68615e-09	3.76834e-07	2257.6	1629.51	2198.1	580.149	548.608	678.532
ENSG00000237037	NDUFA6-AS1	108.314	-1.68195	0.51495	-3.28087	0.00103486	0.0117659	231.093	171.7	109.571	60.8842	26.7875	49.8472
ENSG00000115884	SDC1	2314.75	-1.68187	0.392741	-4.18624	2.83615e-05	0.000551518	7552.75	2188.76	1487.23	941.955	1137.93	579.855
ENSG00000150551	LYPD1	402.738	-1.68031	0.812659	-3.80093	0.000144155	0.00225452	1045.47	270.631	904.629	187.551	0	8.13832
ENSG00000165046	LETM2	300.435	-1.67911	0.45215	-3.66136	0.000250875	0.003622	568.845	666.358	199.099	114.07	118.936	135.3
ENSG00000237036	ZEB1-AS1	54.7039	-1.67658	0.70256	-2.91879	0.00351393	0.0310382	62.2174	98.9317	100.217	1.39964	47.146	18.3112
ENSG00000134259	NGF	587.426	-1.67512	0.345072	-4.9006	9.55428e-07	2.61146e-05	942.149	1331.08	390.18	212.045	544.322	104.781
ENSG00000100285	NEFH	145.257	-1.67364	0.462038	-3.65375	0.00025844	0.00371905	223.316	249.373	201.771	47.5876	99.6495	49.8472
ENSG00000250251	PKD1P6	1835.43	-1.67341	0.321094	-5.23844	1.61936e-07	5.32705e-06	2805.34	2353.92	3232.35	543.059	796.124	1281.78
ENSG00000166667	SPDYE6	25.9428	-1.67125	0.764639	-2.75567	0.00585715	0.0464599	13.3323	59.6861	56.1218	0	21.43	5.08645
ENSG00000198576	ARC	4784.83	-1.66876	0.481793	-3.30251	0.000958225	0.0110584	11113.6	10603.7	986.14	4476.74	721.119	807.728
ENSG00000099864	PALM	2045.42	-1.66835	0.282995	-5.90893	3.44328e-09	1.56999e-07	3978.58	2171.59	3205.62	1384.94	577.538	954.218
ENSG00000196517	SLC6A9	897.701	-1.66772	0.464426	-3.51801	0.000434791	0.00581599	1149.91	470.948	2725.91	250.535	452.173	336.723
ENSG00000120549	KIAA1217	785.765	-1.66532	0.43647	-4.01024	6.06575e-05	0.00106148	1924.3	1260.77	216.47	1116.21	130.723	66.1238
ENSG00000170017	ALCAM	15050.5	-1.66298	0.332169	-4.96523	6.8621e-07	1.94286e-05	12612.4	19780.6	38586.4	5697.22	7038.68	6587.97
ENSG00000053747	LAMA3	185.669	-1.6608	0.54146	-2.86818	0.00412841	0.0352997	739.943	132.454	56.1218	100.774	25.716	59.0028
ENSG00000011332	DPF1	57.8511	-1.66059	0.659474	-2.88782	0.00387922	0.0335269	87.771	111.196	70.8203	4.19891	57.861	15.2593
ENSG00000148516	ZEB1	1606.88	-1.65946	0.287068	-5.77792	7.56302e-09	3.33851e-07	1999.85	2516.63	2884.93	705.417	691.117	843.333
ENSG00000139915	MDGA2	75.6371	-1.65886	0.567852	-2.97423	0.00293723	0.0270823	96.6592	156.983	104.226	47.5876	31.0735	17.2939
ENSG00000071246	VASH1	869.393	-1.65219	0.304393	-5.41756	6.04179e-08	2.19959e-06	2029.84	999.946	991.484	546.558	311.806	336.723
ENSG00000139998	RAB15	673.48	-1.65204	0.387122	-4.37149	1.23402e-05	0.000260948	1215.46	928.813	872.56	614.44	274.304	135.3
ENSG00000103528	SYT17	77.9628	-1.65122	0.529359	-3.11344	0.00184919	0.018765	121.102	143.901	102.89	30.792	38.574	30.5187
ENSG00000186897	C1QL4	314.259	-1.65066	0.523903	-3.22985	0.00123855	0.0136191	433.3	762.837	281.945	226.041	47.146	134.282
ENSG00000139278	GLIPR1	687.889	-1.64756	0.344199	-4.79054	1.66335e-06	4.31275e-05	808.826	1129.13	1232.01	309.32	402.884	245.167
ENSG00000169169	CPT1C	280.655	-1.644	0.382502	-4.29261	1.76582e-05	0.000358793	391.081	375.286	534.493	130.166	132.866	120.04
ENSG00000204618	RNF39	20.9448	-1.63836	0.808673	-3.3913	0.000695631	0.00851882	41.1079	31.8871	37.4145	0	0	15.2593
ENSG00000131389	SLC6A6	1255.75	-1.63431	0.326188	-5.0403	4.64802e-07	1.38632e-05	2000.96	1779.95	1916.16	912.563	405.027	519.835
ENSG00000165804	ZNF219	483.252	-1.63108	0.332463	-4.91771	8.75632e-07	2.42717e-05	939.927	508.558	760.316	325.415	142.509	222.786
ENSG00000068305	MEF2A	5664.8	-1.63058	0.283353	-5.75571	8.62787e-09	3.75227e-07	7186.11	8035.54	10705.9	2147.74	3197.36	2716.16
ENSG00000262102	DSEL	1488.83	-1.62744	0.317842	-5.14733	2.64219e-07	8.33093e-06	2528.69	1931.21	2283.62	1113.41	558.251	517.8
ENSG00000112186	CAP2	458.223	-1.62715	0.516764	-3.44875	0.000563186	0.00719029	759.941	529.816	765.661	51.7866	446.815	195.32
ENSG00000150995	ITPR1	760.339	-1.6261	0.311446	-5.22164	1.77348e-07	5.75631e-06	1041.03	1234.6	1206.62	351.309	323.593	404.881
ENSG00000168961	LGALS9	113.656	-1.62549	0.545307	-3.10498	0.0019029	0.0191823	183.319	201.134	140.304	93.0758	20.3585	43.7434
ENSG00000074181	NOTCH3	663.915	-1.61695	0.456413	-3.63693	0.000275908	0.00393514	1377.67	511.011	1126.44	126.667	208.942	632.754
ENSG00000100968	NFATC4	1955.25	-1.61498	0.505416	-3.96126	7.45541e-05	0.00127682	3163.09	1823.29	2733.93	3524.98	159.653	326.55
ENSG00000139292	LGR5	90.2951	-1.61392	0.550669	-2.76926	0.00561833	0.0448476	339.974	69.4975	30.7333	67.1826	16.0725	18.3112
ENSG00000160219	GAB3	70.9062	-1.61046	0.548721	-2.95784	0.00309805	0.0281335	92.2151	101.385	137.632	21.6944	25.716	46.7953
ENSG00000268500	SIGLEC5	29.5802	-1.60557	0.801255	-3.30914	0.000935823	0.0108558	84.4379	41.6985	24.0522	27.2929	0	0
ENSG00000166922	SCG5	255.716	-1.60534	0.468957	-3.48438	0.000493272	0.00645163	273.312	520.822	382.162	191.75	88.9345	77.314
ENSG00000162738	VANGL2	256.514	-1.60197	0.384806	-4.1521	3.29432e-05	0.000621452	512.183	251.008	419.577	128.067	87.863	140.386
ENSG00000198113	TOR4A	671.842	-1.59922	0.331195	-4.83601	1.32469e-06	3.51576e-05	1494.33	859.316	708.203	480.775	203.585	284.841
ENSG00000074590	NUAK1	1257.97	-1.59534	0.304697	-5.24816	1.53625e-07	5.08923e-06	1968.74	1176.55	2561.56	808.99	331.093	700.912
ENSG00000221818	EBF2	768.558	-1.59347	0.34484	-4.65136	3.29757e-06	7.95425e-05	679.947	1587	1206.62	179.853	375.025	582.907
ENSG00000155893	ACPL2	1179.52	-1.59179	0.350706	-4.59635	4.29964e-06	0.00010109	1994.29	2132.35	1139.81	1061.62	448.958	300.1
ENSG00000244405	ETV5	601.112	-1.59172	0.330329	-4.83339	1.34231e-06	3.55339e-05	836.602	751.39	1134.46	205.047	253.945	425.227
ENSG00000072110	ACTN1	10051.5	-1.59135	0.276433	-5.75058	8.89397e-09	3.81167e-07	19459.6	10875.9	15504.3	5823.19	4379.22	4266.51
ENSG00000182240	BACE2	700.74	-1.5911	0.333334	-4.817	1.45729e-06	3.82339e-05	1353.23	693.339	1093.04	575.251	166.082	323.498
ENSG00000170500	LONRF2	92.4544	-1.58901	0.517804	-3.02508	0.00248565	0.0237624	234.426	73.5856	128.278	46.8878	26.7875	44.7607
ENSG00000121621	KIF18A	113.33	-1.58709	0.489702	-3.30975	0.000933784	0.0108401	225.538	197.046	94.8725	87.4773	55.718	19.3285
ENSG00000198805	PNP	4236.16	-1.58575	0.291316	-5.4925	3.96286e-08	1.50478e-06	6838.36	8892.41	3092.04	2177.83	3664.53	751.777
ENSG00000171819	ANGPTL7	24399.4	-1.58533	0.283119	-5.60532	2.07873e-08	8.41836e-07	19476.3	47146.3	43686.8	6662.97	18844.5	10579.8
ENSG00000176018	LYSMD3	750.457	-1.5812	0.344207	-4.63039	3.64972e-06	8.72031e-05	699.946	635.289	2056.46	312.819	133.937	664.29
ENSG00000143061	IGSF3	1034.28	-1.58094	0.355161	-4.48285	7.3653e-06	0.000165037	1402.11	1420.2	1846.67	380.701	770.408	385.553
ENSG00000174963	ZIC4	53.4036	-1.57628	0.724322	-2.73178	0.00629935	0.049171	59.9954	32.7047	168.365	1.39964	39.6455	18.3112
ENSG00000143387	CTSK	1464.28	-1.57319	0.335416	-4.66681	3.05905e-06	7.42965e-05	3385.29	1996.62	1364.29	660.628	812.197	566.63
ENSG00000172458	IL17D	413.641	-1.5726	0.478346	-3.54519	0.000392326	0.00531235	609.953	421.89	760.316	509.468	83.577	96.6425
ENSG00000075213	SEMA3A	1027.07	-1.56553	0.348063	-4.54515	5.48961e-06	0.000126211	1099.92	1803.66	1670.29	333.813	912.918	341.809
ENSG00000008405	CRY1	2233.72	-1.55346	0.370441	-4.13623	3.53055e-05	0.000661071	5681.78	3252.48	1475.2	889.469	1320.09	783.313
ENSG00000163430	FSTL1	45146.3	-1.55285	0.325135	-4.76571	1.88186e-06	4.80869e-05	71577.8	44296.9	90170.3	22800.1	23598.7	18434.3
ENSG00000179314	WSCD1	80.8084	-1.54885	0.63423	-2.8847	0.0039179	0.0337676	114.436	116.919	130.951	6.99818	92.149	23.3977
ENSG00000183496	MEX3B	489.295	-1.54452	0.36775	-4.2208	2.43433e-05	0.000478121	619.952	628.748	960.751	314.918	148.938	262.461
ENSG00000101680	LAMA1	397.965	-1.53984	0.374382	-4.12001	3.78859e-05	0.000703419	1328.79	244.468	243.194	399.596	56.7895	114.954
ENSG00000107819	SFXN3	1613	-1.53758	0.29114	-5.29736	1.17491e-07	3.97945e-06	3046.43	2331.84	1825.29	1198.79	762.908	512.714
ENSG00000113140	SPARC	507111	-1.53555	0.29388	-5.2369	1.63292e-07	5.3592e-06	636101	603621	1.03598e+06	156606	283024	327335
ENSG00000171988	JMJD1C	4069.8	-1.53399	0.297146	-5.12145	3.03187e-07	9.50867e-06	9553.71	6752.7	2349.1	2816.77	1838.69	1107.83
ENSG00000204060	FOXO6	198.723	-1.53258	0.41156	-3.74254	0.00018217	0.00275863	276.645	248.556	372.809	93.7756	63.2185	137.334
ENSG00000056661	PCGF2	944.799	-1.53193	0.314112	-4.8834	1.04272e-06	2.83252e-05	1316.56	1174.1	1757.15	339.412	486.461	595.114
ENSG00000166503	HDGFRP3	1108.37	-1.53183	0.32281	-4.76605	1.87872e-06	4.80761e-05	1729.87	1268.12	1957.58	821.587	366.453	506.61
ENSG00000173039	RELA	3879.22	-1.53132	0.372569	-4.11061	3.94616e-05	0.000726562	8058.27	6061	3546.36	1218.38	2406.59	1984.73
ENSG00000117525	F3	2521.15	-1.53019	0.32571	-4.8201	1.4349e-06	3.77024e-05	5390.69	4184.57	1356.28	2310.8	1619.04	265.513
ENSG00000146072	TNFRSF21	529.096	-1.5297	0.332882	-4.59242	4.38137e-06	0.000102738	1021.03	659.817	710.876	300.222	270.018	212.614
ENSG00000183092	BEGAIN	147.085	-1.52952	0.513552	-2.92997	0.00338995	0.0301847	434.411	210.945	16.0348	184.052	28.9305	8.13832
ENSG00000238056	PRRT1	156.327	-1.52903	0.606521	-3.03373	0.00241554	0.0232052	188.874	205.222	301.989	5.59855	85.72	150.559
ENSG00000143369	ECM1	343.34	-1.52755	0.493012	-3.38878	0.00070205	0.00857861	466.631	616.483	392.852	421.99	107.15	54.9336
ENSG00000114541	FRMD4B	1389.98	-1.52708	0.336708	-4.51165	6.43245e-06	0.000145613	1486.55	1555.11	3321.87	728.511	555.037	692.774
ENSG00000189184	PCDH18	964.603	-1.52194	0.353209	-4.24393	2.19635e-05	0.000436722	703.279	964.788	2830.14	372.303	332.165	584.941
ENSG00000155849	ELMO1	467.766	-1.52175	0.348296	-4.36161	1.29111e-05	0.000272367	918.818	673.717	526.476	255.434	197.156	234.994
ENSG00000160094	ZNF362	1342.86	-1.52027	0.329601	-4.62987	3.65887e-06	8.73036e-05	2154.28	1848.63	2007.02	460.48	840.056	746.69
ENSG00000142173	COL6A2	85093.5	-1.51694	0.258404	-5.87178	4.31147e-09	1.947e-07	140830	121818	118118	49771.8	42282.5	37741.4
ENSG00000173068	BNC2	271.539	-1.51654	0.386962	-3.93066	8.47144e-05	0.00142866	442.188	347.487	432.939	109.871	114.65	182.095
ENSG00000173641	HSPB7	2052.94	-1.5165	0.407986	-3.78676	0.000152626	0.0023702	3193.09	1944.29	3999.34	1864.32	829.341	487.282
ENSG00000258727	RP11-66N24.3	248.755	-1.51499	0.405304	-3.74835	0.000178004	0.00270018	422.19	356.481	344.748	90.9764	148.938	129.196
ENSG00000186891	TNFRSF18	155.623	-1.51394	0.528865	-3.14138	0.00168156	0.0173329	414.412	193.775	53.4493	236.539	19.287	16.2766
ENSG00000197776	KLHDC1	233.785	-1.50878	0.4713	-3.28672	0.00101361	0.0115765	321.086	248.556	481.044	47.5876	166.082	138.351
ENSG00000245848	CEBPA	259.121	-1.50688	0.460678	-3.07152	0.00212974	0.0210318	228.871	96.4788	930.018	104.273	55.718	139.369
ENSG00000156265	MAP3K7CL	207.499	-1.50549	0.557618	-3.10341	0.00191303	0.0192251	253.314	396.544	255.22	233.739	87.863	18.3112
ENSG00000011600	TYROBP	147.096	-1.50498	0.469786	-3.20365	0.00135697	0.0146455	226.649	345.034	100.217	108.472	69.6475	32.5533
ENSG00000102271	KLHL4	449.783	-1.50411	0.402641	-3.63961	0.00027305	0.00389753	1446.55	393.274	280.609	255.434	207.871	114.954
ENSG00000173926	MARCH3	358.675	-1.50325	0.406035	-3.72067	0.000198699	0.00296069	531.07	328.682	756.308	282.027	113.579	140.386
ENSG00000136010	ALDH1L2	1872.38	-1.50313	0.368222	-4.07722	4.55772e-05	0.00082126	2449.81	1412.02	4647.42	496.171	945.063	1283.82
ENSG00000196911	KPNA5	264.887	-1.50285	0.401102	-3.80276	0.000143095	0.00223992	218.872	500.382	455.655	53.1862	142.509	218.717
ENSG00000103522	IL21R	196.747	-1.50221	0.412526	-3.64464	0.000267767	0.00383141	448.854	303.336	134.959	165.157	80.3625	47.8126
ENSG00000166224	SGPL1	696.732	-1.50096	0.33147	-4.50834	6.53359e-06	0.000147713	1369.89	1152.02	634.71	363.206	368.596	291.962
ENSG00000132334	PTPRE	1012.45	-1.50065	0.294306	-5.09591	3.47067e-07	1.06949e-05	1563.21	2016.24	958.079	542.359	661.115	333.671
ENSG00000173918	C1QTNF1	2548.68	-1.49916	0.285882	-5.26411	1.4087e-07	4.71982e-06	6852.8	2559.96	1890.77	2444.47	1022.21	521.87
ENSG00000214940	NPIPA8	240.581	-1.49876	0.399593	-3.79364	0.000148452	0.00231352	322.197	269.814	475.699	94.4755	70.719	210.579
ENSG00000144596	GRIP2	238.312	-1.49669	0.394774	-3.83705	0.000124519	0.00199694	606.62	197.863	252.548	237.938	52.5035	82.4004
ENSG00000182871	COL18A1	2050.61	-1.49496	0.306771	-4.93006	8.22038e-07	2.28578e-05	4700.75	2452.85	1727.75	2244.32	683.617	494.403
ENSG00000150672	DLG2	93.903	-1.49348	0.516336	-2.82987	0.00465663	0.0388023	65.5505	240.379	130.951	27.2929	51.432	47.8126
ENSG00000143341	HMCN1	1593.14	-1.49257	0.376467	-3.975	7.03801e-05	0.00121476	3218.64	2757.82	1174.55	1318.46	439.315	650.048
ENSG00000164930	FZD6	340.683	-1.49101	0.475837	-3.29679	0.000977964	0.0112421	418.857	407.173	666.78	361.806	85.72	103.764
ENSG00000162065	TBC1D24	426.197	-1.49069	0.377287	-3.90677	9.35392e-05	0.0015552	968.814	313.147	670.789	219.743	163.939	220.752
ENSG00000125633	CCDC93	1009.62	-1.49045	0.384607	-3.87873	0.000105004	0.0017183	2183.16	1195.36	1185.24	351.309	487.532	655.134
ENSG00000128342	LIF	21157.7	-1.48664	0.382418	-3.58539	0.000336579	0.00467214	67810.3	31116.1	1439.12	10310.4	15375	895.215
ENSG00000137491	SLCO2B1	183.087	-1.48578	0.417627	-3.53101	0.000413978	0.0055671	391.081	328.682	112.244	125.267	97.5065	43.7434
ENSG00000174099	MSRB3	1384.16	-1.48478	0.303342	-4.90198	9.48741e-07	2.5972e-05	1958.74	2218.2	1984.31	881.071	687.903	574.769
ENSG00000183023	SLC8A1	102.54	-1.48462	0.518812	-2.94682	0.00321064	0.0289532	192.207	174.152	92.2	97.9746	34.288	24.4149
ENSG00000175264	CHST1	1702.18	-1.48327	0.299491	-4.96511	6.86607e-07	1.94286e-05	1986.51	2836.31	2721.91	656.43	1261.16	750.76
ENSG00000117877	CD3EAP	311.844	-1.48136	0.418839	-3.57291	0.000353034	0.00485855	503.294	572.332	315.351	86.0776	247.516	146.49
ENSG00000167851	CD300A	144.561	-1.47954	0.446652	-3.29953	0.000968476	0.0111476	277.756	231.386	146.986	72.7811	82.5055	55.9509
ENSG00000223561	AC003090.1	357.661	-1.47762	0.455936	-3.14676	0.00165092	0.0170569	149.988	547.804	960.751	82.5786	280.733	124.109
ENSG00000142303	ADAMTS10	1102.1	-1.47655	0.362582	-4.15567	3.24337e-05	0.000614415	2213.16	1376.87	1185.24	1123.91	247.516	465.919
ENSG00000151693	ASAP2	1718.95	-1.47483	0.294502	-5.01727	5.24101e-07	1.52707e-05	2137.61	3152.73	2333.06	599.044	1100.43	990.84
ENSG00000134757	DSG3	307.702	-1.47146	0.445286	-3.39932	0.000675533	0.00833535	455.52	488.117	414.232	64.3833	196.084	227.873
ENSG00000015133	CCDC88C	115.698	-1.4673	0.493333	-3.01907	0.0025355	0.0241605	193.318	188.052	137.632	93.7756	40.717	40.6916
ENSG00000173848	NET1	1624.04	-1.46516	0.311358	-4.67161	2.98844e-06	7.30843e-05	3377.52	1113.59	2856.86	886.67	541.107	968.46
ENSG00000108798	ABI3	110.491	-1.46305	0.498915	-2.89963	0.00373602	0.032496	196.651	217.486	92.2	63.6835	47.146	45.778
ENSG00000114993	RTKN	2914.35	-1.46228	0.312066	-4.71604	2.4048e-06	6.00588e-05	4085.24	4809.22	3883.09	972.747	2358.37	1377.41
ENSG00000145029	NICN1	478.966	-1.46181	0.37647	-3.8666	0.000110363	0.00179271	881.043	439.878	840.49	211.345	251.802	249.236
ENSG00000149948	HMGA2	437.595	-1.46029	0.35519	-4.07327	4.63567e-05	0.000832783	971.036	741.579	267.246	312.819	205.728	127.161
ENSG00000184194	GPR173	304.778	-1.45893	0.416463	-3.51481	0.000440076	0.00586889	586.621	442.331	336.731	106.372	212.157	144.455
ENSG00000115363	EVA1A	61.2615	-1.45674	0.694785	-2.95699	0.00310657	0.028173	114.436	47.4218	104.226	93.0758	5.3575	3.05187
ENSG00000171130	ATP6V0E2	133.121	-1.45669	0.545708	-2.83941	0.00451975	0.0378403	143.322	286.984	164.357	114.07	69.6475	20.3458
ENSG00000197077	KIAA1671	908.308	-1.45547	0.311755	-4.66893	3.02769e-06	7.37379e-05	1566.55	1061.27	1409.73	571.752	447.887	392.674
ENSG00000218336	TENM3	3266.38	-1.44789	0.398917	-3.66705	0.000245368	0.00355324	4256.34	2675.24	7665.97	813.189	2299.44	1888.09
ENSG00000167601	AXL	3503.79	-1.44702	0.290155	-4.99589	5.85655e-07	1.68693e-05	5926.21	4841.93	4691.51	1956.69	2254.44	1351.98
ENSG00000115009	CCL20	345.553	-1.43817	0.452109	-2.81375	0.00489675	0.040271	1139.91	479.941	33.4058	212.745	176.797	30.5187
ENSG00000138316	ADAMTS14	251.499	-1.43716	0.449176	-3.15391	0.00161097	0.016752	586.621	483.212	48.1044	286.226	81.434	23.3977
ENSG00000159189	C1QC	507.56	-1.43695	0.376729	-3.82802	0.000129176	0.00205483	829.936	1021.2	396.861	434.587	213.228	149.542
ENSG00000140577	CRTC3	491.766	-1.4362	0.466037	-3.29495	0.000984404	0.0112885	792.161	622.207	669.452	109.172	155.367	602.235
ENSG00000110719	TCIRG1	1138.72	-1.43579	0.309271	-4.65571	3.22867e-06	7.80939e-05	1916.52	1660.58	1429.77	843.281	452.173	530.008
ENSG00000130224	LRCH2	196.271	-1.43557	0.421636	-3.39107	0.000696191	0.00851882	239.981	237.109	406.215	87.4773	107.15	99.6944
ENSG00000118922	KLF12	1311.58	-1.43534	0.330041	-4.33182	1.47882e-05	0.000306474	1407.67	1577.18	2896.95	722.212	581.824	683.619
ENSG00000153071	DAB2	1112.66	-1.43423	0.321182	-4.48812	7.18555e-06	0.000161419	1816.53	1744.8	1312.18	520.665	885.059	396.743
ENSG00000181016	LSMEM1	96.8294	-1.43102	0.532792	-2.80298	0.00506324	0.0413009	101.103	116.102	209.788	37.0904	18.2155	98.6771
ENSG00000122694	GLIPR2	351.211	-1.43088	0.468562	-3.33655	0.000848261	0.0100052	616.619	417.802	411.56	503.869	95.3635	62.0547
ENSG00000151746	BICD1	358.089	-1.42998	0.366411	-3.90596	9.38533e-05	0.00155895	416.634	528.181	644.064	147.662	241.087	170.905
ENSG00000146151	HMGCLL1	137.909	-1.42876	0.601777	-2.87203	0.00407846	0.0349579	139.989	269.814	192.417	5.59855	98.578	121.057
ENSG00000108239	TBC1D12	435.194	-1.42639	0.336128	-4.24175	2.21779e-05	0.0004395	616.619	502.835	809.757	236.539	177.869	267.547
ENSG00000137094	DNAJB5	688.135	-1.42635	0.331571	-4.31288	1.61142e-05	0.000329696	1228.79	1476.62	328.713	572.451	409.313	112.919
ENSG00000100522	GNPNAT1	2568.21	-1.4232	0.291829	-4.90705	9.24559e-07	2.54282e-05	3728.6	4932.68	2478.71	1305.86	2253.36	710.068
ENSG00000131094	C1QL1	2890.56	-1.4221	0.300396	-4.73255	2.21716e-06	5.56086e-05	3756.38	6136.22	2891.61	1042.03	2078.71	1438.45
ENSG00000143590	EFNA3	134.633	-1.4221	0.453061	-3.1417	0.0016797	0.0173238	225.538	136.542	240.522	88.8769	47.146	69.1757
ENSG00000006327	TNFRSF12A	4410.86	-1.42149	0.273501	-5.19478	2.04958e-07	6.55607e-06	6935.02	8871.96	3627.87	2144.94	3444.87	1440.48
ENSG00000137404	NRM	142.969	-1.4204	0.45995	-3.09349	0.00197816	0.0197559	162.21	239.562	237.849	69.9818	94.292	53.9163
ENSG00000198081	ZBTB14	168.186	-1.4185	0.446689	-3.25893	0.00111831	0.0125611	155.544	232.203	343.412	34.9909	77.148	165.818
ENSG00000167065	DUSP18	233.39	-1.41604	0.487337	-2.822	0.00477251	0.0395439	358.861	615.666	94.8725	198.748	79.291	52.8991
ENSG00000160963	COL26A1	249.38	-1.41499	0.409971	-3.49488	0.000474282	0.00624489	918.818	138.995	53.4493	310.719	61.0755	13.2248
ENSG00000126822	PLEKHG3	514.757	-1.41292	0.344606	-4.11133	3.93395e-05	0.000725828	783.273	755.478	725.574	263.132	212.157	348.93
ENSG00000185339	TCN2	196.357	-1.40836	0.451279	-3.14796	0.00164412	0.0170166	252.203	246.103	372.809	75.5804	151.081	80.3659
ENSG00000101670	LIPG	440.577	-1.40123	0.344481	-4.0877	4.35671e-05	0.000790611	812.159	680.258	431.603	362.506	218.586	138.351
ENSG00000180233	ZNRF2	275.704	-1.39839	0.472425	-2.84601	0.00442707	0.0372232	142.211	732.585	403.542	119.669	117.865	138.351
ENSG00000181444	ZNF467	133.819	-1.39268	0.49072	-2.86083	0.00422528	0.0359199	206.651	127.548	261.902	38.49	69.6475	98.6771
ENSG00000128573	FOXP2	239.045	-1.39266	0.385931	-3.62108	0.000293375	0.00416075	506.628	264.908	279.273	198.049	85.72	99.6944
ENSG00000198517	MAFK	5473.91	-1.39195	0.305233	-4.54833	5.40721e-06	0.000124618	8960.42	10133.5	5111.09	3477.4	2559.81	2601.21
ENSG00000143320	CRABP2	1321.02	-1.38918	0.320285	-4.32106	1.55278e-05	0.000319179	2432.03	2268.89	1150.5	860.776	609.683	604.27
ENSG00000083642	PDS5B	1339.78	-1.38738	0.297617	-4.67185	2.985e-06	7.30843e-05	1864.3	1743.98	2231.51	743.207	521.82	933.872
ENSG00000008441	NFIX	5233.11	-1.38636	0.271339	-5.11087	3.20682e-07	9.98638e-06	7172.78	6707.73	8991.51	2333.19	2838.4	3355.02
ENSG00000070882	OSBPL3	123.762	-1.38598	0.478326	-2.9108	0.00360509	0.0315906	167.765	222.392	160.348	85.3778	57.861	48.8299
ENSG00000224712	NPIPA3	38.9467	-1.38179	0.79165	-3.19186	0.00141361	0.0151639	53.3292	31.8871	97.545	0	1.0715	49.8472
ENSG00000261149	TMEM130	480.474	-1.3779	0.398182	-3.43551	0.000591438	0.00748067	1111.03	663.088	376.818	287.625	175.726	268.564
ENSG00000167685	ZNF444	373.746	-1.3734	0.435094	-3.24609	0.00117	0.0130504	471.075	596.861	542.51	367.405	123.222	141.403
ENSG00000197969	VPS13A	1168.35	-1.37082	0.402262	-3.42063	0.000624759	0.00783477	1018.81	1707.18	2441.3	871.274	462.888	508.645
ENSG00000143772	ITPKB	510.312	-1.3708	0.423568	-3.21147	0.0013206	0.0143514	1485.44	537.992	272.591	431.788	108.221	225.838
ENSG00000142327	RNPEPL1	535.908	-1.36549	0.345259	-3.96261	7.4134e-05	0.00127209	717.722	845.416	777.687	344.311	227.158	303.152
ENSG00000140416	TPM1	7981.27	-1.3635	0.329571	-4.15759	3.21627e-05	0.000611959	9644.81	11621.6	13377	6177.3	3695.6	3371.3
ENSG00000018236	CNTN1	461.021	-1.3633	0.348917	-3.98537	6.73743e-05	0.00116859	1392.11	202.769	358.11	627.037	58.9325	127.161
ENSG00000263044	NSUN5P1	325.884	-1.36178	0.520895	-2.75217	0.00592009	0.0468539	649.95	289.437	485.052	50.3869	167.154	313.325
ENSG00000108823	SGCA	113.446	-1.35542	0.481671	-2.86246	0.0042036	0.0358219	81.1048	220.757	193.754	22.3942	98.578	64.0892
ENSG00000090971	NAT14	249.176	-1.35396	0.438458	-3.21503	0.00130432	0.0142075	456.631	350.758	240.522	301.622	81.434	64.0892
ENSG00000124593	PRICKLE4	354.499	-1.35087	0.35275	-3.8329	0.00012664	0.00202178	489.962	405.538	652.081	209.246	138.223	231.942
ENSG00000100739	BDKRB1	548.374	-1.35017	0.472858	-3.2748	0.00105736	0.0119678	1823.19	260.002	12.0261	1163.1	27.859	4.06916
ENSG00000132965	ALOX5AP	291.018	-1.34936	0.414761	-3.20166	0.00136637	0.0147289	583.288	532.269	187.073	191.75	129.651	122.075
ENSG00000173372	C1QA	184.225	-1.34811	0.446866	-2.95983	0.00307806	0.028044	316.642	403.903	105.562	132.266	90.006	56.9682
ENSG00000107779	BMPR1A	136.156	-1.34681	0.668528	-3.27943	0.00104019	0.0118107	56.6623	314.783	191.081	0	222.872	31.536
ENSG00000153879	CEBPG	2157.59	-1.34663	0.284297	-4.73931	2.14452e-06	5.394e-05	3281.97	2337.57	3741.45	1481.52	870.058	1232.95
ENSG00000122515	ZMIZ2	1164.79	-1.34097	0.308423	-4.33643	1.44818e-05	0.00030154	2364.26	1209.26	1527.31	683.722	517.534	686.67
ENSG00000139514	SLC7A1	3232.76	-1.34037	0.282069	-4.7427	2.10886e-06	5.31945e-05	6450.61	4105.26	3559.72	2001.48	1785.12	1494.4
ENSG00000151458	ANKRD50	1025.58	-1.33981	0.340569	-3.90797	9.30762e-05	0.00154896	1396.56	910.826	2228.84	512.967	533.607	570.699
ENSG00000166341	DCHS1	2935.83	-1.33785	0.292269	-4.58427	4.55575e-06	0.000106403	4572.98	3537.83	4579.27	1322.66	1467.95	2134.27
ENSG00000083720	OXCT1	1054.52	-1.33399	0.465277	-3.09028	0.00199965	0.0199254	1157.69	1468.44	1751.8	1340.15	355.738	253.305
ENSG00000165168	CYBB	455.799	-1.33271	0.373485	-3.52706	0.000420196	0.00564642	896.597	828.246	295.307	327.515	212.157	174.974
ENSG00000111145	ELK3	4498.01	-1.3322	0.287905	-4.63489	3.57123e-06	8.55593e-05	7683.85	6646.41	5076.35	2390.58	3350.58	1840.28
ENSG00000187764	SEMA4D	401.132	-1.32995	0.438762	-3.05747	0.00223216	0.0217633	691.058	349.94	716.221	118.969	273.232	257.374
ENSG00000159403	C1R	851.285	-1.32901	0.332287	-4.02217	5.76639e-05	0.0010135	2098.73	703.968	859.197	868.474	352.523	224.821
ENSG00000079337	RAPGEF3	559.646	-1.3282	0.444015	-2.99497	0.0027447	0.0257874	1418.78	757.114	295.307	507.368	117.865	261.443
ENSG00000188599	NPIPP1	1213.49	-1.32742	0.357379	-3.7445	0.000180757	0.00273959	1538.77	1985.17	1701.02	965.749	436.1	654.117
ENSG00000198901	PRC1	528.003	-1.32643	0.351344	-3.77753	0.000158391	0.0024404	753.275	919.819	622.684	357.607	238.944	275.685
ENSG00000185697	MYBL1	259.132	-1.3258	0.440497	-2.98948	0.00279457	0.0261354	285.534	592.773	272.591	171.455	110.364	122.075
ENSG00000213599	SLX1A-SULT1A3	402.286	-1.32418	0.446906	-2.92531	0.00344111	0.0305322	945.483	292.707	559.881	140.663	199.299	275.685
ENSG00000104611	SH2D4A	225.265	-1.32346	0.430467	-3.03929	0.00237136	0.0228554	178.875	264.09	561.218	115.47	80.3625	151.576
ENSG00000151694	ADAM17	988.61	-1.32215	0.296531	-4.45299	8.4681e-06	0.000185972	1605.43	1762.78	920.664	580.149	675.045	387.587
ENSG00000142949	PTPRF	2007.46	-1.32011	0.283621	-4.64665	3.37377e-06	8.12696e-05	3985.25	2298.32	2438.62	1321.26	950.42	1050.86
ENSG00000073050	XRCC1	22.6685	-1.31972	0.806526	-3.13294	0.00173066	0.0177149	12.2213	55.598	42.7594	0	0	25.4322
ENSG00000104856	RELB	985.322	-1.31941	0.356316	-3.73967	0.000184264	0.00277844	2690.9	1130.76	314.015	1381.44	243.23	151.576
ENSG00000139354	GAS2L3	125.83	-1.31901	0.489498	-2.74216	0.00610357	0.0480262	246.648	187.234	112.244	122.468	38.574	47.8126
ENSG00000213316	LTC4S	215.983	-1.31898	0.644076	-3.565	0.000363855	0.0049803	271.09	217.486	326.041	454.182	12.858	14.2421
ENSG00000143624	INTS3	76.1687	-1.31755	0.722399	-2.8776	0.00400719	0.034407	121.102	127.548	80.1739	18.8951	109.293	0
ENSG00000164828	SUN1	4572.06	-1.31638	0.282152	-4.67332	2.9637e-06	7.27817e-05	6540.61	6242.51	6864.23	2042.77	2485.88	3256.34
ENSG00000189060	H1F0	6659.23	-1.31562	0.346319	-3.78511	0.000153642	0.00237903	6088.42	9329.01	13767.2	3621.56	4356.72	2792.46
ENSG00000187796	CARD9	128.238	-1.31453	0.463132	-2.81056	0.00494554	0.0405778	291.089	158.618	118.925	84.678	63.2185	52.8991
ENSG00000141068	KSR1	668.804	-1.31431	0.384304	-3.42582	0.000612947	0.00769672	1029.92	594.408	1285.46	545.158	309.663	248.219
ENSG00000164764	SBSPON	531.111	-1.31414	0.340314	-3.84126	0.000122403	0.00197016	1608.76	354.028	375.481	536.061	121.079	191.25
ENSG00000250588	IQCJ-SCHIP1	1103.07	-1.3121	0.294795	-4.46185	8.12557e-06	0.000179463	1378.78	2272.16	1078.34	551.457	964.35	373.345
ENSG00000118263	KLF7	941.334	-1.31126	0.319596	-4.11561	3.86157e-05	0.000714714	1734.31	1125.86	1187.91	697.719	560.394	341.809
ENSG00000109452	INPP4B	525.035	-1.30907	0.434199	-3.1683	0.00153333	0.0161733	497.739	558.433	1162.52	78.3796	435.029	418.106
ENSG00000137942	FNBP1L	547.753	-1.30823	0.354209	-3.72473	0.000195527	0.0029233	904.375	694.975	741.609	456.981	186.441	302.135
ENSG00000055163	CYFIP2	302.177	-1.3068	0.480407	-2.96039	0.00307252	0.0280225	496.628	456.23	275.264	438.086	67.5045	79.3486
ENSG00000137478	FCHSD2	1770.22	-1.30436	0.298093	-4.3656	1.26776e-05	0.000267762	1780.97	2775.81	3124.11	920.261	961.135	1059
ENSG00000083444	PLOD1	12472.7	-1.30411	0.321329	-4.05565	4.99959e-05	0.000889897	25680.2	13739.2	14722.6	6646.87	8701.65	5345.86
ENSG00000119714	GPR68	414.441	-1.30337	0.390679	-3.2404	0.00119362	0.0132598	1044.36	638.559	179.055	247.036	265.732	111.902
ENSG00000158859	ADAMTS4	320.382	-1.30294	0.396514	-3.37482	0.000738637	0.00892074	853.267	329.5	146.986	456.282	79.291	56.9682
ENSG00000124201	ZNFX1	2127.22	-1.3016	0.290691	-4.46264	8.09569e-06	0.00017913	3277.52	4088.9	1876.07	1150.5	1428.31	942.01
ENSG00000169919	GUSB	1538.59	-1.30065	0.293891	-4.42153	9.80025e-06	0.000211286	2282.05	1556.74	2807.42	1032.23	657.901	895.215
ENSG00000205336	GPR56	1152.13	-1.29919	0.380076	-3.37646	0.000734242	0.00889198	2946.44	1484.79	673.461	902.766	361.095	544.25
ENSG00000139154	AEBP2	1213.67	-1.29853	0.295888	-4.38887	1.13941e-05	0.000242393	1713.2	1386.68	2124.61	573.151	626.827	857.575
ENSG00000151414	NEK7	1525.19	-1.29825	0.3111	-4.15637	3.23343e-05	0.000613899	1468.78	1996.62	3180.23	691.42	930.062	884.025
ENSG00000140403	DNAJA4	710.363	-1.2969	0.348536	-3.74035	0.000183763	0.00277636	1484.33	811.894	757.644	547.258	217.514	443.538
ENSG00000010818	HIVEP2	1896.12	-1.29524	0.291716	-4.43407	9.24695e-06	0.00020009	4139.68	3148.64	859.197	1859.42	995.423	374.363
ENSG00000106683	LIMK1	1099.73	-1.29408	0.308506	-4.17748	2.9476e-05	0.000569429	2379.82	1245.23	1163.86	722.912	544.322	542.215
ENSG00000167874	TMEM88	457.741	-1.29364	0.390607	-3.14693	0.00164997	0.0170569	1389.89	586.232	97.545	420.591	178.94	73.2448
ENSG00000241534	CFB	40.8517	-1.29268	0.746712	-2.86116	0.00422092	0.0359057	149.988	21.258	6.68116	67.1826	0	0
ENSG00000204344	STK19	242.65	-1.29087	0.463803	-2.94907	0.00318732	0.028787	235.537	203.587	570.571	34.9909	105.007	306.204
ENSG00000019505	SYT13	1138.43	-1.28737	0.390757	-3.35095	0.000805343	0.00957572	1536.55	887.932	2413.24	265.931	574.324	1152.59
ENSG00000159164	SV2A	735.63	-1.28725	0.348644	-3.69183	0.000222644	0.00327603	1078.81	804.535	1296.15	379.301	491.818	363.172
ENSG00000035862	TIMP2	12438.6	-1.28693	0.281628	-4.59365	4.3555e-06	0.000102267	22672.7	13825.9	16005.4	11831.1	4877.47	5419.1
ENSG00000160223	ICOSLG	379.437	-1.28437	0.370861	-3.40987	0.000649939	0.00808167	1293.23	245.285	140.304	438.086	80.3625	79.3486
ENSG00000170266	GLB1	2551.28	-1.28319	0.343432	-3.72524	0.000195132	0.00291988	3148.65	2250.9	5709.72	958.051	1614.75	1625.63
ENSG00000184500	PROS1	1512.08	-1.28232	0.416508	-3.07008	0.00214002	0.0211214	1497.66	1524.86	3619.85	1168.7	723.262	538.146
ENSG00000108639	SYNGR2	544.092	-1.28208	0.35991	-3.59432	0.000325238	0.00453846	855.489	646.735	809.757	489.173	251.802	211.596
ENSG00000162804	SNED1	985.406	-1.28015	0.34247	-3.7391	0.000184682	0.00278236	1655.43	1030.2	1562.06	423.39	608.612	632.754
ENSG00000152689	RASGRP3	341.463	-1.27899	0.358324	-3.57189	0.000354414	0.00487374	466.631	504.47	498.415	214.144	199.299	165.818
ENSG00000120458	MSANTD2	450.401	-1.2776	0.38851	-3.30103	0.000963322	0.0111027	547.735	933.719	462.336	153.26	282.876	322.481
ENSG00000144810	COL8A1	13901.2	-1.27753	0.360599	-3.61785	0.000297061	0.00420963	17893.1	17094.7	23028.6	14636	4544.23	6210.55
ENSG00000250067	YJEFN3	432.62	-1.27466	0.46311	-2.88236	0.00394702	0.0339489	696.613	561.703	565.226	88.1771	268.946	415.054
ENSG00000143147	GPR161	206.418	-1.27462	0.40999	-3.12253	0.00179303	0.0182371	288.867	292.707	305.997	92.376	103.935	154.628
ENSG00000151967	SCHIP1	191.494	-1.27368	0.409524	-3.10491	0.00190334	0.0191823	431.078	269.814	129.615	153.96	114.65	49.8472
ENSG00000170113	NIPA1	619.49	-1.27243	0.341395	-3.73315	0.000189101	0.00284408	975.48	765.29	915.319	322.616	436.1	302.135
ENSG00000158792	SPATA2L	250.175	-1.271	0.491799	-2.80293	0.00506408	0.0413009	339.974	393.274	291.299	335.213	78.2195	63.0719
ENSG00000020181	GPR124	4338.15	-1.27091	0.314535	-4.04116	5.31878e-05	0.000941018	4819.63	6096.97	7716.74	2974.23	2215.86	2205.48
ENSG00000159335	PTMS	4193.4	-1.26864	0.358028	-3.59762	0.000321137	0.00449312	6460.61	3785.57	7325.23	4530.62	1535.46	1522.88
ENSG00000197461	PDGFA	3461.05	-1.26403	0.336135	-3.76239	0.000168299	0.00257508	6296.18	5754.39	2779.36	3019.72	1308.3	1608.33
ENSG00000225489	RP11-390F4.3	169.947	-1.26298	0.432133	-2.94475	0.00323214	0.0291173	286.645	278.807	163.02	91.6762	143.581	55.9509
ENSG00000139263	LRIG3	1600.99	-1.2602	0.290514	-4.3399	1.42549e-05	0.000297516	2060.95	1824.92	2943.72	704.017	866.843	1205.49
ENSG00000136848	DAB2IP	795.046	-1.25874	0.356078	-3.6044	0.000312877	0.00440548	1403.22	738.308	1149.16	916.762	246.445	316.377
ENSG00000230445	LRRC37A6P	163.71	-1.25851	0.434407	-2.91179	0.00359368	0.0315689	202.207	257.549	243.194	71.3815	128.58	79.3486
ENSG00000137309	HMGA1	5477.82	-1.25493	0.277471	-4.53923	5.64602e-06	0.000129134	10104.8	9118.07	3915.16	3721.63	4588.16	1419.12
ENSG00000089327	FXYD5	2116.76	-1.25477	0.290098	-4.32193	1.54671e-05	0.000318301	2685.35	3702.17	2665.78	1132.31	1210.79	1304.17
ENSG00000064042	LIMCH1	2395.81	-1.2539	0.281876	-4.44516	8.78247e-06	0.000191921	4088.57	2864.93	3283.12	1398.94	1281.51	1457.78
ENSG00000222009	BTBD19	1029.88	-1.25324	0.341478	-3.6631	0.000249177	0.00360042	2268.71	1318.82	849.844	594.846	796.124	350.965
ENSG00000177363	LRRN4CL	409.389	-1.25252	0.449601	-2.92838	0.00340736	0.0303092	535.514	433.337	721.566	502.47	120.008	143.438
ENSG00000005379	BZRAP1	706.619	-1.25123	0.341183	-3.66346	0.000248828	0.00359832	1218.79	1180.64	629.365	561.954	320.378	328.585
ENSG00000228253	MT-ATP8	27127.2	-1.25114	0.280181	-4.44392	8.83342e-06	0.00019232	22957.1	63088.2	31373.4	10558.9	19657.7	15128.1
ENSG00000198315	ZKSCAN8	314.878	-1.2488	0.474845	-2.80112	0.00509252	0.0414945	293.311	288.619	744.281	42.6889	251.802	268.564
ENSG00000135862	LAMC1	5420.44	-1.2484	0.267029	-4.67536	2.93438e-06	7.21621e-05	9394.83	6067.54	7588.46	3989.66	2653.03	2829.08
ENSG00000081041	CXCL2	746.193	-1.24673	0.402588	-3.56502	0.000363823	0.0049803	2529.8	138.995	74.829	1685.16	31.0735	17.2939
ENSG00000100234	TIMP3	27006.4	-1.2454	0.408966	-2.99428	0.0027509	0.0258228	21911.6	27279	70541	17627.7	14449.2	10229.9
ENSG00000088881	EBF4	416.306	-1.24444	0.345208	-3.63321	0.000279915	0.00398907	946.594	317.235	494.406	419.891	106.078	213.631
ENSG00000146416	AIG1	356.68	-1.24289	0.41769	-2.94757	0.00320281	0.0288973	266.646	655.729	633.374	207.846	222.872	153.611
ENSG00000213626	LBH	3393.43	-1.24266	0.370174	-3.36808	0.000756942	0.00911065	6366.17	3094.68	5079.02	1639.67	2673.39	1507.62
ENSG00000119403	PHF19	1390.07	-1.24115	0.297244	-4.17542	2.97437e-05	0.000572097	1563.21	2236.18	2116.59	706.816	732.906	984.736
ENSG00000104998	IL27RA	282.418	-1.24113	0.427899	-2.90304	0.00369559	0.0322715	471.075	481.577	265.91	136.465	135.009	204.475
ENSG00000008256	CYTH3	1144.29	-1.23708	0.317631	-3.88651	0.000101697	0.00166883	2366.48	1258.31	1281.45	744.607	487.532	727.362
ENSG00000136826	KLF4	10621.5	-1.23664	0.303935	-4.06499	4.80345e-05	0.000859317	15704.3	9372.35	20235.9	8497.89	4398.51	5519.81
ENSG00000260374	ARHGAP23	162.725	-1.23588	0.424649	-2.9109	0.0036039	0.0315906	217.761	188.87	292.635	92.376	71.7905	112.919
ENSG00000140199	SLC12A6	163.529	-1.23296	0.431631	-2.84267	0.00447375	0.0375264	163.321	360.569	183.064	61.584	121.079	91.5561
ENSG00000163131	CTSS	203.588	-1.23141	0.45239	-2.81928	0.00481315	0.0397874	308.865	311.512	228.496	216.944	101.792	53.9163
ENSG00000109685	WHSC1	1268	-1.22954	0.294764	-4.16587	3.1017e-05	0.000592073	2240.94	1458.63	1702.36	786.596	691.117	728.379
ENSG00000145423	SFRP2	842.619	-1.22889	0.34651	-3.55602	0.000376509	0.00512569	1508.77	1441.46	613.331	830.684	366.453	295.014
ENSG00000154277	UCHL1	2235.74	-1.22591	0.366953	-3.40546	0.000660533	0.00817311	3131.98	2622.92	3512.96	2351.39	1039.35	755.846
ENSG00000179981	TSHZ1	304.912	-1.22374	0.423788	-2.87844	0.00399644	0.0343382	635.506	311.512	370.136	139.264	215.371	157.68
ENSG00000092871	RFFL	1586.28	-1.22154	0.326329	-3.76448	0.000166896	0.00255805	2076.51	2276.25	2318.36	1029.43	1211.87	605.287
ENSG00000018408	WWTR1	3584.99	-1.22152	0.300724	-4.08209	4.46329e-05	0.000807644	5036.28	5377.47	4622.03	2710.4	2408.73	1355.03
ENSG00000182013	PNMAL1	634.07	-1.22121	0.359006	-3.41776	0.000631384	0.00790103	878.821	712.962	1093.04	242.837	459.673	417.089
ENSG00000175414	ARL10	1122.62	-1.22014	0.445235	-2.79819	0.00513895	0.0417773	2050.95	848.687	1881.42	517.166	1046.86	390.639
ENSG00000173442	EHBP1L1	1871.36	-1.21931	0.333768	-3.67754	0.00023549	0.00343073	2766.45	3046.44	2039.09	1706.16	776.837	893.18
ENSG00000165943	MOAP1	604.779	-1.21888	0.325377	-3.73267	0.000189463	0.0028471	889.931	551.892	1145.15	373.703	274.304	393.691
ENSG00000173040	EVC2	324.865	-1.21849	0.37995	-3.21321	0.00131261	0.0142802	373.304	322.141	688.16	112.671	185.369	267.547
ENSG00000182197	EXT1	1243.89	-1.21472	0.297966	-4.06912	4.71905e-05	0.000845931	2320.93	1460.26	1511.28	795.693	699.689	675.48
ENSG00000168077	SCARA3	697.997	-1.21349	0.392739	-3.06024	0.00221162	0.0216227	1446.55	1123.41	448.974	548.658	258.231	362.155
ENSG00000165633	VSTM4	331.106	-1.21313	0.385159	-3.16953	0.00152684	0.0161219	438.855	403.903	557.209	123.868	240.016	222.786
ENSG00000249072	RP11-777B9.5	400.893	-1.21311	0.358255	-3.38425	0.000713724	0.00870319	377.749	689.251	637.383	175.654	208.942	316.377
ENSG00000164402	SEPT8	1769.99	-1.21286	0.308421	-3.92819	8.55877e-05	0.00144063	3326.41	1683.47	2509.44	1343.65	967.564	789.417
ENSG00000169231	THBS3	4843.73	-1.21086	0.351258	-3.44211	0.000577195	0.00733204	10257	5763.38	4684.83	2228.22	3876.69	2252.28
ENSG00000175592	FOSL1	5282.03	-1.21056	0.296203	-4.02479	5.70257e-05	0.0010059	8530.45	12364	2076.51	3053.31	4414.58	1253.3
ENSG00000139266	MARCH9	288.311	-1.20984	0.3948	-3.07756	0.00208704	0.0206911	391.081	464.407	367.464	219.743	126.437	160.732
ENSG00000176887	SOX11	886.588	-1.20967	0.309261	-3.88654	0.000101682	0.00166883	2242.05	817.617	756.308	769.1	381.454	352.999
ENSG00000204590	GNL1	910.46	-1.20605	0.370207	-3.24961	0.00115564	0.0129064	806.604	1460.26	1630.2	618.639	521.82	425.227
ENSG00000164164	OTUD4	1636.43	-1.20449	0.321469	-3.71473	0.000203424	0.00302345	3451.96	2402.16	1194.59	1163.1	833.627	773.14
ENSG00000167987	VPS37C	448.803	-1.20318	0.353788	-3.41618	0.000635061	0.00793809	613.286	534.722	740.273	181.953	261.446	361.138
ENSG00000125648	SLC25A23	646.005	-1.20199	0.327947	-3.67536	0.000237517	0.0034574	1038.81	806.171	873.896	406.594	277.518	473.04
ENSG00000166833	NAV2	2008.79	-1.20156	0.278019	-4.32286	1.54017e-05	0.000317325	1939.85	2992.48	3528.99	798.493	1376.88	1416.07
ENSG00000086015	MAST2	2802.24	-1.1995	0.326455	-3.6669	0.000245509	0.00355324	4949.62	4312.93	2655.09	1324.76	1877.27	1693.79
ENSG00000176853	FAM91A1	1193.79	-1.19919	0.373588	-3.26126	0.00110917	0.0124902	1695.42	1407.12	1864.04	404.495	1110.07	681.584
ENSG00000172572	PDE3A	1021.08	-1.19576	0.41655	-2.88234	0.00394728	0.0339489	2239.83	978.688	1145.15	398.896	879.701	484.23
ENSG00000197769	MAP1LC3C	155.302	-1.19492	0.434803	-2.75964	0.00578643	0.0460229	278.867	205.222	175.046	128.767	69.6475	74.2621
ENSG00000179163	FUCA1	651.965	-1.19387	0.323645	-3.69329	0.000221375	0.00326006	1051.03	904.285	789.713	378.602	477.889	310.273
ENSG00000142733	MAP3K6	1641.76	-1.19249	0.286672	-4.16138	3.16331e-05	0.00060253	2218.72	2169.14	2516.13	1101.51	858.271	986.771
ENSG00000147854	UHRF2	1300.12	-1.19049	0.307803	-3.85559	0.000115449	0.00186845	2203.16	2096.37	1218.64	741.807	856.128	684.636
ENSG00000109089	CDR2L	1258.43	-1.18953	0.298318	-3.98273	6.81295e-05	0.00117707	2116.5	1770.96	1427.1	755.804	745.764	734.483
ENSG00000183458	RP11-958N24.1	2033.09	-1.18945	0.382053	-3.15754	0.00159107	0.0166135	3074.21	1766.05	3651.92	572.451	1239.73	1894.19
ENSG00000099814	CEP170B	1660.81	-1.18789	0.365719	-3.23646	0.00121024	0.013406	3127.54	2560.78	1401.71	713.115	1105.79	1055.95
ENSG00000110171	TRIM3	428.043	-1.18691	0.339815	-3.49628	0.000471792	0.00622603	761.052	602.584	438.284	351.309	220.729	194.302
ENSG00000129116	PALLD	9123.24	-1.18659	0.27642	-4.28847	1.79907e-05	0.00036471	11592.4	10839.2	16033.5	5802.19	4970.69	5501.5
ENSG00000085276	MECOM	380.359	-1.1846	0.360321	-3.30638	0.000945108	0.0109285	419.968	627.112	545.183	141.363	245.373	303.152
ENSG00000185340	GAS2L1	539.133	-1.18438	0.330641	-3.59419	0.000325406	0.00453846	929.928	643.465	684.151	442.985	225.015	309.256
ENSG00000129675	ARHGEF6	537.082	-1.18437	0.376943	-3.1558	0.0016006	0.0166736	774.385	584.596	904.629	248.435	429.671	280.772
ENSG00000125354	SEPT6	1556.43	-1.18408	0.31079	-3.81198	0.000137855	0.00217331	2437.59	2339.2	1770.51	746.706	1061.86	982.702
ENSG00000145247	OCIAD2	410.69	-1.18376	0.409289	-2.90828	0.00363422	0.031767	758.83	457.048	521.131	157.459	241.087	328.585
ENSG00000154642	C21orf91	290.503	-1.18364	0.380801	-3.09546	0.00196509	0.019681	458.853	277.172	501.087	158.159	157.51	190.233
ENSG00000160991	ORAI2	2305.65	-1.18238	0.390637	-3.05983	0.0022146	0.0216398	4261.89	2336.75	3089.37	829.984	2021.92	1293.99
ENSG00000143179	UCK2	813.285	-1.18169	0.313781	-3.78121	0.00015607	0.00241097	1071.03	1409.57	911.311	504.569	673.973	309.256
ENSG00000182578	CSF1R	407.228	-1.17752	0.398124	-2.9868	0.00281917	0.0262681	559.957	789.818	355.438	399.596	197.156	141.403
ENSG00000084636	COL16A1	19676.8	-1.17626	0.275144	-4.29865	1.71844e-05	0.000349568	38046	20787.9	22160.1	20653	8119.83	8293.96
ENSG00000105520	DKFZP761J1410	1459.72	-1.1739	0.284138	-4.13066	3.61731e-05	0.000675882	2233.16	1951.65	1936.2	897.867	881.844	857.575
ENSG00000176971	FIBIN	6659.86	-1.17328	0.359431	-3.26046	0.00111231	0.0125176	5745.11	7718.31	14798.8	2664.91	5822.53	3209.55
ENSG00000071243	ING3	312.682	-1.17085	0.432747	-2.80506	0.00503068	0.0411425	404.413	470.13	404.878	81.1789	336.451	179.043
ENSG00000146648	EGFR	1011.55	-1.17059	0.31665	-3.69032	0.000223971	0.00329006	1261.01	1098.88	1908.14	494.072	642.9	664.29
ENSG00000257365	FNTB	245.492	-1.17007	0.409751	-2.91104	0.00360229	0.0315906	245.537	396.544	374.145	67.1826	219.657	169.887
ENSG00000182809	CRIP2	3463.95	-1.16995	0.377966	-3.18283	0.00145844	0.0155412	4365.22	4655.51	5046.95	3957.47	1581.53	1177
ENSG00000170004	CHD3	4034.76	-1.16916	0.302819	-3.87068	0.000108533	0.00176787	8741.55	4990.74	3055.96	4256.99	1478.67	1684.63
ENSG00000153234	NR4A2	2104.01	-1.16893	0.382492	-3.05139	0.00227781	0.022135	1922.07	2725.94	4304	1522.1	1295.44	854.523
ENSG00000214022	REPIN1	918.213	-1.16461	0.298757	-3.89451	9.83963e-05	0.00162578	1461	816.8	1575.42	585.048	378.239	692.774
ENSG00000071282	LMCD1	1204.98	-1.16451	0.435705	-2.84535	0.00443621	0.0372646	1427.67	1542.84	1830.64	1622.18	459.673	346.896
ENSG00000154783	FGD5	174.452	-1.16038	0.421527	-2.76113	0.00576012	0.0458344	151.099	296.795	285.954	60.1844	108.221	144.455
ENSG00000066739	ATG2B	925.6	-1.16014	0.348271	-3.36283	0.000771466	0.00925392	1151.02	1456.18	1218.64	386.3	475.746	865.713
ENSG00000102879	CORO1A	541.894	-1.15526	0.363343	-3.15234	0.00161969	0.0168328	1021.03	950.071	326.041	495.471	260.374	198.371
ENSG00000159200	RCAN1	7844.64	-1.15414	0.276416	-4.17217	3.01706e-05	0.000578418	20923.9	9331.47	2774.02	7829.57	5053.19	1155.64
ENSG00000151176	PLBD2	845.873	-1.1534	0.368511	-3.17565	0.00149503	0.015845	1245.46	1093.15	1139.81	338.712	838.984	419.123
ENSG00000150051	MKX	1234.95	-1.15274	0.34643	-3.30483	0.000950347	0.0109819	1092.14	1020.39	3166.87	393.998	759.693	976.598
ENSG00000091428	RAPGEF4	212.925	-1.14925	0.401951	-2.86411	0.0041818	0.0356878	429.967	363.022	101.554	162.358	178.94	41.7089
ENSG00000130559	CAMSAP1	786.969	-1.1483	0.304254	-3.77472	0.000160189	0.00246596	1206.57	1112.78	963.424	553.556	451.101	434.383
ENSG00000183087	GAS6	3891.38	-1.14784	0.287735	-3.98449	6.76262e-05	0.00117181	8221.59	4146.14	3940.55	3179.97	1577.25	2282.8
ENSG00000130592	LSP1	784.057	-1.14772	0.379115	-3.15072	0.00162867	0.0168963	1286.57	1181.46	669.452	874.073	543.25	149.542
ENSG00000197321	SVIL	1686.98	-1.14636	0.395854	-2.89494	0.00379226	0.0328945	2052.06	1201.9	3916.5	545.858	1239.73	1165.81
ENSG00000179820	MYADM	8523.65	-1.14088	0.270596	-4.22912	2.34606e-05	0.000462326	14868.9	11516.1	8717.58	7787.58	4816.39	3435.39
ENSG00000178498	DTX3	910.991	-1.13904	0.303994	-3.75625	0.000172476	0.00262351	1654.32	1116.87	999.502	819.487	420.028	455.746
ENSG00000176973	FAM89B	1222.24	-1.13757	0.300876	-3.7911	0.000149983	0.00233531	1854.3	1638.5	1562.06	1012.64	611.826	654.117
ENSG00000123572	NRK	7387.75	-1.13597	0.289453	-3.96587	7.31298e-05	0.00125608	7701.63	15019.6	7090.05	3231.06	8854.87	2429.29
ENSG00000019485	PRDM11	426.253	-1.13478	0.339296	-3.33718	0.000846333	0.00998911	516.627	461.136	808.421	224.642	229.301	317.394
ENSG00000006459	KDM7A	1127.13	-1.13214	0.37198	-3.05554	0.00224656	0.0218674	2178.72	1022.02	1511.28	748.106	875.415	427.262
ENSG00000134508	CABLES1	400.202	-1.13067	0.342783	-3.2949	0.000984556	0.0112885	725.5	393.274	553.2	315.618	192.87	220.752
ENSG00000080822	CLDND1	1892.96	-1.12957	0.327571	-3.46948	0.000521471	0.00675541	2818.67	2324.49	2660.44	1250.58	1536.53	767.036
ENSG00000158747	NBL1	2153.96	-1.12762	0.308058	-3.72677	0.000193951	0.00290465	4791.85	2010.52	1738.44	3017.62	726.477	638.858
ENSG00000148341	SH3GLB2	744.221	-1.12488	0.330556	-3.40763	0.00065529	0.00813674	1168.8	878.121	1043.6	467.479	541.107	366.224
ENSG00000258430	RP11-982M15.2	57.6406	-1.1242	0.766586	-3.596	0.000323154	0.00451776	69.9946	154.53	12.0261	0	109.293	0
ENSG00000221890	NPTXR	504.167	-1.12337	0.332166	-3.39847	0.00067764	0.0083555	928.817	525.728	621.348	486.374	218.586	244.149
ENSG00000144642	RBMS3	872.424	-1.12275	0.346699	-3.25356	0.00113968	0.0127605	928.817	1410.39	1270.76	578.05	698.618	347.913
ENSG00000137962	ARHGAP29	361.666	-1.12262	0.350828	-3.20968	0.00132885	0.0144154	386.637	520.005	590.615	150.461	229.301	292.979
ENSG00000205560	CPT1B	495.218	-1.12213	0.381551	-2.98862	0.00280238	0.0261909	717.722	573.967	729.583	187.551	251.802	510.679
ENSG00000136052	SLC41A2	460.586	-1.12016	0.385204	-2.93243	0.00336318	0.0300102	682.17	528.998	693.505	198.748	399.669	260.426
ENSG00000198964	SGMS1	379.672	-1.11912	0.419841	-2.73891	0.00616426	0.0483529	518.849	493.023	538.502	105.673	330.022	291.962
ENSG00000165434	PGM2L1	598.494	-1.11866	0.318483	-3.51549	0.000438943	0.00586264	931.039	775.919	772.342	440.186	363.238	308.239
ENSG00000173275	ZNF449	307.636	-1.1175	0.402318	-2.7787	0.00545776	0.0438118	187.763	240.379	873.896	60.8842	174.654	308.239
ENSG00000047644	WWC3	1681.21	-1.11691	0.294734	-3.79452	0.000147931	0.00231152	2248.72	2140.52	2554.88	823.686	1187.22	1132.24
ENSG00000138639	ARHGAP24	475.61	-1.11629	0.331957	-3.36411	0.000767914	0.00923013	837.713	628.748	506.432	389.099	247.516	244.149
ENSG00000106799	TGFBR1	5073.97	-1.11568	0.354397	-3.245	0.0011745	0.013084	7481.64	7110.82	5483.9	6346.65	2542.67	1478.12
ENSG00000184271	POU6F1	535.13	-1.11536	0.342631	-3.23363	0.00122228	0.0134876	456.631	1021.2	772.342	277.828	365.381	317.394
ENSG00000188517	COL25A1	1265.84	-1.11507	0.395749	-2.86634	0.00415246	0.0354717	1096.58	1112.78	3049.28	303.021	1121.86	911.491
ENSG00000105738	SIPA1L3	441.663	-1.11381	0.365204	-3.04886	0.00229708	0.0222855	756.608	585.414	498.415	221.143	309.663	278.737
ENSG00000205730	ITPRIPL2	3199.99	-1.11284	0.314007	-3.56022	0.000370549	0.00506016	4363	3867.33	4924.02	1365.35	2568.38	2111.89
ENSG00000168487	BMP1	2639.43	-1.11238	0.294389	-3.80334	0.000142756	0.0022366	4230.78	3765.13	2757.98	2454.26	1664.04	964.39
ENSG00000175265	GOLGA8A	8291.29	-1.11228	0.300657	-3.71726	0.000201395	0.00299581	13514.5	13906	6455.34	4270.29	8653.43	2948.1
ENSG00000196639	HRH1	1142.62	-1.11186	0.292957	-3.80964	0.000139168	0.00219009	2370.93	1610.71	709.539	1114.81	761.836	287.893
ENSG00000112624	GLTSCR1L	315.354	-1.11002	0.377058	-2.95553	0.0031213	0.0282775	349.973	527.363	427.594	137.164	188.584	261.443
ENSG00000261258	FKBP10	22903.6	-1.1097	0.314486	-3.5251	0.000423323	0.00567118	41764.6	27219.3	26299.7	11521.1	14833.8	15783.2
ENSG00000197183	C20orf112	1486.2	-1.10894	0.305026	-3.63286	0.000280292	0.00399123	2370.93	2184.67	1608.82	971.348	806.839	974.563
ENSG00000001617	SEMA3F	1492.68	-1.10842	0.28461	-3.88921	0.000100573	0.00165346	2414.26	1395.67	2379.83	1047.63	693.26	1025.43
ENSG00000185559	DLK1	16592.6	-1.10733	0.396132	-2.78474	0.00535706	0.0432509	10041.4	39611.9	20620.7	11537.2	12656.6	5087.46
ENSG00000205542	TMSB4X	11150.1	-1.10725	0.406703	-2.85259	0.00433641	0.0366881	12223.5	14829.9	17118.5	14425.4	4110.27	4193.27
ENSG00000205923	CEMP1	38.441	-1.10477	0.795637	-3.67509	0.000237769	0.00345823	61.1064	56.4156	49.4406	63.6835	0	0
ENSG00000243749	ZMYM6NB	291.008	-1.10276	0.40296	-2.73609	0.0062175	0.0486624	442.188	288.619	483.716	138.564	206.799	186.164
ENSG00000184489	PTP4A3	369.924	-1.09891	0.362618	-3.08116	0.00206196	0.0205	794.383	349.123	346.084	464.679	136.08	129.196
ENSG00000164985	PSIP1	1595.28	-1.09798	0.341667	-3.19338	0.00140617	0.0150935	1501	1638.5	3571.75	1119.01	700.761	1040.69
ENSG00000123094	RASSF8	1412.94	-1.0976	0.351101	-3.18467	0.00144917	0.0154797	1980.96	1758.69	1934.86	1562.69	529.321	711.085
ENSG00000163071	SPATA18	321.998	-1.0961	0.384065	-2.81662	0.00485326	0.0400252	595.51	224.845	539.838	205.047	151.081	215.665
ENSG00000166261	ZNF202	330.137	-1.09594	0.388799	-2.80261	0.00506913	0.041323	443.299	626.295	314.015	187.551	195.013	214.648
ENSG00000183474	GTF2H2C	409.435	-1.09581	0.347847	-3.16572	0.00154698	0.016288	433.3	636.924	609.322	161.658	340.737	274.668
ENSG00000166073	GPR176	981.269	-1.09387	0.321464	-3.41024	0.000649048	0.00808109	1567.66	1125.86	1344.25	722.912	679.331	447.607
ENSG00000108797	CNTNAP1	1085.36	-1.09348	0.412748	-2.75883	0.00580093	0.0460968	1915.41	1195.36	1228	552.157	1300.8	320.446
ENSG00000160216	AGPAT3	475.058	-1.09242	0.384638	-2.89138	0.00383551	0.0332304	715.5	467.677	738.937	529.762	195.013	203.458
ENSG00000066697	MSANTD3	913.578	-1.09011	0.324067	-3.34278	0.000829427	0.00981581	1889.85	1078.44	855.189	627.737	517.534	512.714
ENSG00000158711	ELK4	1082.4	-1.08974	0.294281	-3.70179	0.000214083	0.00316058	1724.31	1323.72	1412.4	715.214	609.683	709.051
ENSG00000140743	CDR2	1949.11	-1.08901	0.314885	-3.48033	0.000500804	0.00652597	2838.67	2319.58	2768.67	958.051	964.35	1845.36
ENSG00000153208	MERTK	565.701	-1.08689	0.324457	-3.34073	0.000835571	0.00987529	1155.47	476.671	716.221	453.482	227.158	365.207
ENSG00000130508	PXDN	11936.4	-1.08529	0.320262	-3.37943	0.00072636	0.00883288	22452.7	11873.4	15271.8	6439.03	8281.62	7300.07
ENSG00000108854	SMURF2	667.618	-1.08406	0.3115	-3.48081	0.000499909	0.00652394	915.485	911.643	919.328	422.69	388.954	447.607
ENSG00000163069	SGCB	2379.29	-1.08293	0.290265	-3.72984	0.000191603	0.00287442	3578.61	2703.86	3507.61	1587.19	1572.96	1325.53
ENSG00000115904	SOS1	1074.39	-1.08078	0.355833	-3.0562	0.00224159	0.0218311	1456.55	1062.08	1888.1	403.795	804.696	831.126
ENSG00000253305	PCDHGB6	1442.35	-1.07622	0.320208	-3.36501	0.000765408	0.00920627	2052.06	1605.8	2266.25	1065.82	963.278	700.912
ENSG00000089639	GMIP	510.914	-1.0747	0.389157	-2.74592	0.00603418	0.0475862	1049.92	559.25	526.476	259.633	297.877	372.328
ENSG00000099381	SETD1A	710.607	-1.07456	0.320416	-3.37511	0.000737859	0.00891743	717.722	883.844	1276.1	306.52	343.951	735.5
ENSG00000111737	RAB35	1220.8	-1.07422	0.34937	-3.0646	0.00217962	0.0214047	2256.49	1667.94	1143.81	609.542	844.342	802.641
ENSG00000170624	SGCD	1584.47	-1.07237	0.38038	-2.82765	0.00468909	0.0389992	2078.73	1401.4	3073.33	726.411	1369.38	857.575
ENSG00000164305	CASP3	762.726	-1.07171	0.356961	-3.04235	0.00234741	0.0226865	1023.25	993.405	1060.97	782.397	345.023	371.311
ENSG00000142552	RCN3	9500.36	-1.06928	0.30176	-3.53924	0.000401274	0.00542104	16505.4	12597	10021.7	5623.74	5468.93	6785.32
ENSG00000196923	PDLIM7	3148.1	-1.06921	0.289339	-3.70712	0.000209626	0.00310257	3811.93	5773.2	3233.68	2262.51	2604.82	1202.44
ENSG00000111711	GOLT1B	2069.33	-1.06908	0.308051	-3.47345	0.000513807	0.0066659	3454.18	2140.52	2882.25	1125.31	1083.29	1730.41
ENSG00000213398	LCAT	729.195	-1.06869	0.387895	-2.75762	0.00582239	0.0462257	1273.23	1089.88	654.754	326.815	461.816	568.665
ENSG00000177283	FZD8	2516.38	-1.06661	0.277242	-3.84522	0.000120444	0.00194217	3747.49	2344.93	4214.48	1536.1	1185.08	2070.18
ENSG00000244257	PKD1P1	1325.29	-1.06589	0.389823	-2.78435	0.00536348	0.0432829	1872.08	923.09	2544.19	370.904	651.472	1590.02
ENSG00000100345	MYH9	12742.7	-1.06521	0.30466	-3.53124	0.000413614	0.00556645	19140.7	17456.9	14419.3	13514.9	6614.37	5310.25
ENSG00000112715	VEGFA	14323.3	-1.06516	0.27317	-3.88936	0.000100508	0.00165346	31709.8	15982	11447.5	12451.9	9070.25	5278.72
ENSG00000206478	IER3	16862.2	-1.06389	0.301665	-3.45025	0.00056007	0.00716606	43919.9	22442	4837.16	18550.8	8007.32	3416.06
ENSG00000142156	COL6A1	45884.1	-1.06278	0.258218	-4.11701	3.83824e-05	0.000711888	61973	70725.5	54484.9	29879.4	33793	24448.5
ENSG00000104081	BMF	737.842	-1.06172	0.351712	-2.99754	0.00272168	0.0256589	1506.55	668.811	897.948	430.388	395.383	527.973
ENSG00000153815	CMIP	2904.9	-1.06147	0.362792	-2.84867	0.00439022	0.0370369	6203.97	4839.48	1272.09	1471.02	2632.67	1010.17
ENSG00000073921	PICALM	4232.87	-1.06092	0.271897	-3.90491	9.42624e-05	0.00156281	5590.68	5937.54	5723.08	2402.48	3194.14	2549.33
ENSG00000104365	IKBKB	601.877	-1.06013	0.31648	-3.3548	0.00079421	0.00946885	1247.68	540.445	670.789	592.046	236.801	323.498
ENSG00000085832	EPS15	1636.2	-1.05571	0.334227	-3.11705	0.00182674	0.0185585	1536.55	1483.98	3876.41	946.154	875.415	1098.67
ENSG00000168615	ADAM9	2024.92	-1.05554	0.338612	-3.13828	0.00169941	0.0174849	2870.89	1917.31	3415.41	2046.27	952.563	947.097
ENSG00000112149	CD83	1006.37	-1.05354	0.303195	-3.50818	0.000451181	0.00599888	2505.36	816.8	689.496	1387.04	335.379	304.17
ENSG00000119771	KLHL29	1492.61	-1.05336	0.30703	-3.44774	0.000565307	0.00720175	1817.64	2035.05	2186.08	629.836	1210.79	1076.29
ENSG00000054392	HHAT	294.493	-1.05302	0.389204	-2.74046	0.00613533	0.0482117	357.75	548.621	288.626	223.242	257.16	91.5561
ENSG00000079308	TNS1	3380.48	-1.05068	0.331775	-3.1937	0.0014046	0.0150858	4977.39	4171.48	4489.74	1492.01	3190.93	1961.33
ENSG00000179397	C1orf101	18.27	-1.04882	0.812601	-2.96401	0.00303654	0.0277517	43.33	25.3461	17.371	0	23.573	0
ENSG00000130176	CNN1	386.244	-1.04853	0.374105	-2.77898	0.00545305	0.0438055	747.72	533.086	324.704	264.531	217.514	229.907
ENSG00000176490	DIRAS1	492.582	-1.04824	0.36687	-2.89488	0.00379301	0.0328945	693.28	641.012	646.736	501.77	214.3	258.392
ENSG00000140367	UBE2Q2	1919.91	-1.0463	0.282134	-3.70758	0.00020925	0.0030996	2003.18	3065.25	2755.31	1031.53	1526.89	1137.33
ENSG00000174373	RALGAPA1	693.844	-1.04471	0.318176	-3.28594	0.00101642	0.0115936	762.163	1022.02	1042.26	372.303	561.466	402.847
ENSG00000169756	LIMS1	2374.37	-1.04465	0.275202	-3.79388	0.000148309	0.00231352	3814.15	2871.47	2994.5	1661.37	1414.38	1490.33
ENSG00000148700	ADD3	1312.34	-1.04412	0.296025	-3.53275	0.000411265	0.00553905	1939.85	1627.88	1761.15	868.474	667.544	1009.15
ENSG00000119865	CNRIP1	725.298	-1.04227	0.307497	-3.39071	0.000697128	0.00852436	867.711	1003.22	1082.35	389.099	507.891	501.524
ENSG00000137166	FOXP4	5028.52	-1.04221	0.3315	-3.18073	0.00146905	0.0156299	6543.94	4777.34	8799.09	1735.55	2953.05	5362.13
ENSG00000213977	TAX1BP3	1172.28	-1.04103	0.344642	-3.06693	0.00216269	0.0212978	1639.87	1643.41	1383	1285.57	591.468	490.334
ENSG00000070081	NUCB2	2527.44	-1.04058	0.316761	-3.28783	0.00100962	0.0115385	2967.55	4231.17	3106.74	1976.99	1330.8	1551.37
ENSG00000103811	CTSH	293.399	-1.03853	0.363869	-2.85307	0.00432995	0.036651	505.517	362.204	332.722	229.54	176.797	153.611
ENSG00000134247	PTGFRN	1953.91	-1.03821	0.368636	-2.94408	0.00323921	0.0291513	4043.02	1248.5	2113.92	3213.57	617.184	487.282
ENSG00000163961	RNF168	728.455	-1.03576	0.340266	-3.06402	0.00218383	0.0214153	1053.25	1010.57	876.568	652.231	319.307	458.798
ENSG00000114933	INO80D	755.775	-1.03509	0.350594	-2.99125	0.0027784	0.0260118	878.821	895.291	1254.72	254.034	573.252	678.532
ENSG00000049860	HEXB	2769.49	-1.03499	0.338729	-3.07477	0.00210664	0.020862	3207.53	2949.15	5050.96	2627.82	1190.44	1591.04
ENSG00000196159	FAT4	1634.74	-1.03322	0.339537	-3.07371	0.00211416	0.0209013	2147.61	1998.26	2413.24	708.216	1586.89	954.218
ENSG00000187105	HEATR4	31.9638	-1.03235	0.789448	-2.76201	0.00574468	0.0457321	35.5528	85.8498	18.7073	0.699818	2.143	48.8299
ENSG00000080603	SRCAP	1619.61	-1.02754	0.345521	-3.00489	0.00265676	0.0251665	2336.49	1882.15	2280.95	618.639	1131.5	1467.95
ENSG00000095319	NUP188	962.791	-1.02716	0.299848	-3.41368	0.000640909	0.00799755	1915.41	759.566	1266.75	824.386	411.456	599.184
ENSG00000075407	ZNF37A	563.296	-1.02442	0.327771	-3.1263	0.00177023	0.0180676	643.284	640.194	1006.18	266.631	371.81	451.677
ENSG00000115504	EHBP1	666.893	-1.02405	0.366543	-2.76533	0.0056865	0.0453098	1383.23	567.426	817.774	402.395	430.743	399.795
ENSG00000105329	TGFB1	4269.29	-1.02368	0.271829	-3.76677	0.000165374	0.00253914	7230.55	5303.07	4747.63	3514.49	2253.36	2566.62
ENSG00000102302	FGD1	1111.59	-1.02366	0.31027	-3.30806	0.000939461	0.0108774	1546.55	1439.01	1501.93	576.65	685.76	919.63
ENSG00000105559	PLEKHA4	752.219	-1.0233	0.341131	-3.06761	0.00215775	0.0212826	1578.77	744.849	602.641	1067.92	247.516	271.616
ENSG00000159842	ABR	3188.35	-1.01815	0.291432	-3.5046	0.000457302	0.00607111	4353	4210.73	4251.89	2770.58	1661.9	1881.99
ENSG00000135720	DYNC1LI2	3278.16	-1.01724	0.37509	-2.73346	0.00626732	0.0489872	5140.71	2900.91	5246.05	1292.56	2839.47	2249.23
ENSG00000109079	TNFAIP1	1140.66	-1.01574	0.319767	-3.17135	0.00151734	0.0160622	2045.4	1332.72	1268.08	706.816	857.2	633.771
ENSG00000070404	FSTL3	2564.06	-1.01571	0.300872	-3.35506	0.000793471	0.00946885	7481.64	1795.49	1268.08	3297.54	691.117	850.454
ENSG00000152484	USP12	1589.3	-1.01371	0.286539	-3.5371	0.000404552	0.00545698	2693.13	2208.38	1525.98	1373.74	926.847	807.728
ENSG00000166965	RCCD1	435.562	-1.0132	0.341686	-2.97934	0.00288866	0.0268165	728.833	471.765	553.2	398.197	191.798	269.582
ENSG00000130340	SNX9	1552.15	-1.0131	0.293314	-3.45411	0.000552106	0.00708469	2372.04	1964.73	1942.88	952.453	953.635	1127.16
ENSG00000004660	CAMKK1	1396.78	-1.01272	0.303208	-3.33339	0.000857952	0.0100791	1568.77	1642.59	2473.37	955.252	806.839	933.872
ENSG00000068971	PPP2R5B	505.888	-1.01149	0.326153	-3.105	0.00190281	0.0191823	566.623	744.032	733.592	249.835	375.025	366.224
ENSG00000136205	TNS3	6676.69	-1.011	0.308764	-3.29594	0.000980942	0.0112617	10148.1	8082.15	8475.72	5093.98	5525.72	2734.47
ENSG00000181045	SLC26A11	974.479	-1.01076	0.352584	-2.86818	0.00412841	0.0352997	1217.68	834.787	1914.82	389.799	672.902	816.883
ENSG00000219438	FAM19A5	913.836	-1.00881	0.344363	-2.9602	0.00307438	0.028025	1141.02	1430.01	1078.34	862.876	608.612	362.155
ENSG00000162734	PEA15	4553.94	-1.00835	0.298364	-3.39271	0.000692055	0.00849572	6375.06	5693.89	6196.11	3675.45	3290.58	2092.56
ENSG00000127334	DYRK2	1219.18	-1.00802	0.306002	-3.30006	0.000966629	0.0111336	1708.76	1552.66	1650.25	720.813	985.78	696.843
ENSG00000139725	RHOF	433.975	-1.00759	0.357544	-2.83236	0.00462054	0.038538	537.736	648.37	561.218	211.345	265.732	379.449
ENSG00000116266	STXBP3	869.388	-1.0072	0.314024	-3.21576	0.00130101	0.0141889	1137.69	1178.19	1181.23	471.678	730.763	516.783
ENSG00000197724	PHF2	1372.01	-1.00558	0.289075	-3.4823	0.000497118	0.00649231	1863.19	1674.48	1985.64	829.984	781.123	1097.66
ENSG00000089820	ARHGAP4	505.079	-1.00467	0.354201	-2.85636	0.00428526	0.0363948	791.05	760.384	471.69	519.265	257.16	230.925
ENSG00000205746	RP11-1212A22.1	2218.78	-1.00449	0.349601	-2.93687	0.00331544	0.029686	2783.12	2036.68	3847.01	717.314	1142.22	2786.36
ENSG00000053254	FOXN3	2331.47	-1.00287	0.290202	-3.47256	0.000515525	0.00668328	3620.83	2387.44	3287.13	2249.92	1005.07	1438.45
ENSG00000161671	EMC10	1812.72	-1.00199	0.298245	-3.35945	0.00078099	0.00935545	2446.48	3311.35	1566.06	1523.5	1275.08	753.812
ENSG00000107331	ABCA2	1355.49	-1.00092	0.325489	-3.12321	0.0017889	0.018216	2249.83	1595.99	1465.85	1599.78	718.976	502.541
ENSG00000072071	LPHN1	1736.56	-0.998304	0.279084	-3.57705	0.000347498	0.00480484	2579.8	2080.02	2334.4	1229.58	1010.42	1185.14
ENSG00000104870	FCGRT	2341.71	-0.998224	0.273693	-3.64725	0.000265061	0.00379885	3638.61	2610.65	3178.9	1815.33	1308.3	1498.47
ENSG00000143157	POGK	862.272	-0.996201	0.360109	-2.7694	0.00561597	0.0448476	1372.12	826.611	1294.81	411.493	664.33	604.27
ENSG00000114544	SLC41A3	1405.43	-0.995568	0.323961	-3.04518	0.0023254	0.0225231	1169.91	1674.48	2939.71	746.706	953.635	948.114
ENSG00000145685	LHFPL2	1216.37	-0.995516	0.289884	-3.44137	0.000578787	0.0073417	2129.84	1777.5	970.105	1049.03	933.276	438.452
ENSG00000165359	DDX26B	775.906	-0.994941	0.349934	-2.84746	0.00440697	0.0371072	1419.89	1165.1	534.493	853.078	347.166	335.706
ENSG00000182796	TMEM198B	443.303	-0.994246	0.337032	-2.94792	0.00319921	0.0288796	569.956	753.843	467.681	245.636	364.31	258.392
ENSG00000198727	MT-CYB	76721.2	-0.993543	0.295541	-3.35251	0.000800812	0.00952826	78820.6	138513	94161.6	53072.8	48140.3	47619.3
ENSG00000135046	ANXA1	16561.4	-0.993035	0.263169	-3.7591	0.000170528	0.00260019	34548.4	23108.3	9544.71	15960.1	10932.5	5274.65
ENSG00000143862	ARL8A	887.881	-0.992278	0.328324	-3.01848	0.00254049	0.024195	1473.22	946.801	1174.55	531.162	646.114	555.44
ENSG00000126003	PLAGL2	394.431	-0.991423	0.349036	-2.84649	0.00442044	0.0371852	562.179	439.878	585.27	226.041	217.514	335.706
ENSG00000138080	EMILIN1	7325.8	-0.989378	0.302076	-3.23728	0.00120677	0.0133759	14460	11305.2	4388.19	6210.19	4367.43	3223.79
ENSG00000215700	PNRC2	1799.54	-0.989012	0.306349	-3.23595	0.00121239	0.013413	2660.91	2402.98	2150	1194.59	927.919	1460.83
ENSG00000227460	SYNGAP1	755.637	-0.988153	0.31677	-3.13647	0.00170994	0.0175537	1118.8	660.635	1230.67	477.276	294.662	751.777
ENSG00000158079	PTPDC1	832.546	-0.987939	0.301052	-3.28293	0.00102735	0.0116956	1001.03	1143.03	1201.27	472.377	553.965	623.598
ENSG00000137070	IL11RA	1881.07	-0.986859	0.283309	-3.48292	0.000495985	0.00648232	3823.04	1940.21	1801.24	1851.72	852.914	1017.29
ENSG00000154240	CEP112	415.451	-0.98615	0.344554	-2.86229	0.00420589	0.0358241	531.07	624.66	519.794	303.721	256.088	257.374
ENSG00000110651	CD81	11221.8	-0.984792	0.284685	-3.48544	0.00049133	0.00643576	19238.5	11885.7	13018.9	12523.2	4906.4	5757.86
ENSG00000152952	PLOD2	15841.6	-0.984615	0.341726	-2.95425	0.00313431	0.0283662	17776.4	22234.3	21084.4	6316.56	20347.8	7289.9
ENSG00000181852	RNF41	1098.49	-0.983759	0.326648	-3.03164	0.00243231	0.0233283	1242.13	1143.85	1992.32	417.092	765.051	1030.51
ENSG00000182919	C11orf54	371.918	-0.983621	0.36061	-2.72826	0.006367	0.0496022	424.412	494.658	582.597	275.728	208.942	245.167
ENSG00000145555	MYO10	1571.23	-0.982324	0.358877	-2.81455	0.00488456	0.0402083	2582.02	1874.8	1622.19	1981.19	482.175	885.042
ENSG00000138709	LARP1B	604.666	-0.981378	0.332413	-2.95785	0.00309797	0.0281335	724.388	835.605	867.215	442.285	313.949	444.556
ENSG00000100815	TRIP11	1323.51	-0.980261	0.339949	-2.90885	0.00362765	0.0317411	1816.53	1523.22	1922.84	531.862	1027.57	1119.02
ENSG00000143162	CREG1	1069.89	-0.979798	0.339991	-2.89236	0.00382358	0.0331433	1166.58	1601.71	1520.63	925.16	638.614	566.63
ENSG00000185551	NR2F2	659.065	-0.976825	0.3261	-2.99947	0.00270451	0.025523	666.615	538.81	1448.48	423.39	225.015	652.083
ENSG00000079819	EPB41L2	2694.07	-0.97594	0.306113	-3.18746	0.00143527	0.0153405	4964.06	2831.41	3045.27	2007.78	2042.28	1273.65
ENSG00000182287	AP1S2	980.986	-0.974745	0.330182	-2.95735	0.00310294	0.0281545	1293.23	1126.68	1513.95	618.639	799.339	534.077
ENSG00000136603	SKIL	6933.79	-0.97443	0.307779	-3.18876	0.00142886	0.0152899	8387.13	10095.1	8968.79	5160.46	6121.48	2869.77
ENSG00000162520	SYNC	526.703	-0.973637	0.333828	-2.91712	0.00353277	0.0311579	692.169	811.894	611.994	407.294	322.521	314.342
ENSG00000058091	CDK14	570.965	-0.972945	0.343166	-2.81758	0.00483876	0.0399616	1139.91	493.841	689.496	458.381	346.094	298.066
ENSG00000175866	BAIAP2	933.288	-0.97218	0.344164	-2.86861	0.00412274	0.0352861	1600.99	1407.12	633.374	1199.49	459.673	299.083
ENSG00000130024	PHF10	1580.25	-0.971976	0.281097	-3.45694	0.000546356	0.00703648	2215.38	1694.92	2419.92	1121.81	863.629	1165.81
ENSG00000184402	SS18L1	924.099	-0.970239	0.324007	-2.98339	0.00285072	0.0265112	1014.37	1815.93	911.311	681.623	669.687	451.677
ENSG00000140836	ZFHX3	2214.51	-0.970154	0.349102	-2.83313	0.00460941	0.0384633	2887.55	3005.56	2737.94	2585.13	979.351	1091.55
ENSG00000159433	STARD9	825.162	-0.970026	0.327681	-2.98949	0.00279441	0.0261354	1274.35	952.524	1022.22	881.071	379.311	441.504
ENSG00000112773	FAM46A	2041.49	-0.969614	0.298576	-3.25047	0.00115216	0.0128757	2854.22	1828.19	3482.22	1831.42	916.132	1336.72
ENSG00000102409	BEX4	1217.74	-0.967503	0.291798	-3.314	0.000919703	0.0107035	1467.66	1551.02	1860.04	765.601	842.199	819.935
ENSG00000162980	ARL5A	1825.43	-0.959885	0.30414	-3.14763	0.00164598	0.0170258	1616.54	1861.71	3885.76	738.308	1282.59	1567.64
ENSG00000165458	INPPL1	4484.93	-0.957421	0.323011	-2.98333	0.00285126	0.0265112	6530.61	5323.51	5903.47	1957.39	3323.79	3870.79
ENSG00000077150	NFKB2	3278.61	-0.950762	0.305945	-3.11468	0.00184142	0.0186969	7337.21	3659.65	1962.93	4175.12	1260.08	1276.7
ENSG00000196588	MKL1	925.33	-0.950634	0.317284	-2.99179	0.00277349	0.0259934	1546.55	1062.08	1098.38	582.249	588.253	674.463
ENSG00000169641	LUZP1	1232.31	-0.949784	0.300525	-3.17089	0.00151972	0.0160777	1717.65	1712.91	1448.48	1002.14	924.704	587.993
ENSG00000115641	FHL2	1712.84	-0.948756	0.281756	-3.37538	0.000737138	0.00891482	2286.49	3375.94	1125.11	1249.18	1714.4	525.939
ENSG00000010327	STAB1	731.465	-0.948682	0.311519	-3.06395	0.00218434	0.0214153	1469.89	890.385	518.458	848.88	421.099	240.08
ENSG00000150093	ITGB1	17169.4	-0.947727	0.281731	-3.36364	0.000769224	0.00923959	24454.8	18720.2	25220.1	12808.1	11930.1	9882.97
ENSG00000169967	MAP3K2	2425.77	-0.945051	0.329511	-2.86803	0.00413033	0.0352997	3086.43	2187.94	4433.62	1106.41	1822.62	1917.59
ENSG00000198160	MIER1	894.444	-0.93938	0.304724	-3.08737	0.00201937	0.0201105	1123.25	1114.41	1308.17	482.175	621.47	717.189
ENSG00000120063	GNA13	1571.78	-0.935803	0.293325	-3.19169	0.00141445	0.0151639	2005.4	1967.19	2264.91	1065.12	1184.01	944.045
ENSG00000237825	RGL2	1099.66	-0.934234	0.292438	-3.1938	0.00140412	0.0150858	1754.31	1180.64	1433.78	835.583	602.183	791.451
ENSG00000113273	ARSB	1000.14	-0.933337	0.320227	-2.92499	0.00344468	0.0305335	1441	1356.43	1151.83	539.56	910.775	601.218
ENSG00000104447	TRPS1	3821.73	-0.932837	0.334421	-2.83611	0.00456671	0.0381792	4877.4	5258.1	4658.11	1485.01	4257.07	2394.7
ENSG00000155760	FZD7	1381.11	-0.932523	0.294189	-3.16349	0.00155891	0.0163679	1666.54	1459.45	2383.84	965.049	803.625	1008.13
ENSG00000196850	PPTC7	838.901	-0.930736	0.309488	-2.9996	0.0027033	0.025523	1431	829.882	1089.03	606.043	485.389	592.062
ENSG00000133226	SRRM1	3980.61	-0.930568	0.315478	-2.98826	0.0028057	0.0261911	5639.56	4070.92	5693.69	2266.71	1652.25	4560.51
ENSG00000138162	TACC2	1119.92	-0.929074	0.310758	-3.00455	0.00265973	0.0251811	1625.43	1622.15	1151.83	1101.51	681.474	537.129
ENSG00000139793	MBNL2	1969.14	-0.928877	0.305515	-3.03044	0.00244196	0.0234081	2205.39	2106.18	3567.74	1424.13	1201.15	1310.27
ENSG00000106723	SPIN1	2359.19	-0.928807	0.296398	-3.13327	0.00172872	0.0177053	2558.69	2781.53	4027.4	1237.98	1894.41	1655.13
ENSG00000116132	PRRX1	5182.67	-0.925614	0.2779	-3.33489	0.00085333	0.0100448	6511.72	6759.24	7179.58	3194.67	4286	3164.79
ENSG00000116731	PRDM2	995.611	-0.923128	0.305863	-3.0179	0.0025453	0.0242277	1413.22	1113.59	1419.08	593.446	682.545	751.777
ENSG00000162458	FBLIM1	1462.93	-0.921535	0.28776	-3.21533	0.00130293	0.0142011	2790.9	1345.8	1590.12	1635.48	668.616	746.69
ENSG00000100106	TRIOBP	1498.67	-0.920614	0.32018	-2.88786	0.00387872	0.0335269	1686.54	2042.41	2166.03	977.646	1374.73	744.656
ENSG00000198786	MT-ND5	91886.8	-0.919435	0.290801	-3.14601	0.00165517	0.0170909	69019.1	175735	123039	41858.2	64028.5	77640.6
ENSG00000108819	PPP1R9B	1532.81	-0.918884	0.31856	-2.88298	0.00393938	0.033914	2564.25	1835.55	1686.33	939.156	938.634	1232.95
ENSG00000138119	MYOF	3019.47	-0.918107	0.284883	-3.22945	0.00124027	0.0136191	4246.34	4222.18	3403.38	1825.13	2707.68	1712.1
ENSG00000106665	CLIP2	1077.58	-0.917832	0.301319	-3.04697	0.00231164	0.0224021	1846.52	910.826	1505.93	808.29	467.174	926.751
ENSG00000120256	LRP11	1382.53	-0.916759	0.329691	-2.80747	0.00499319	0.0409118	1715.42	1748.88	1926.85	610.242	1362.95	930.82
ENSG00000158604	TMED4	1771.24	-0.911751	0.297266	-3.06186	0.00219964	0.0215395	2440.92	1810.2	2774.02	1279.97	1184.01	1138.35
ENSG00000151835	SACS	1546.26	-0.91027	0.313559	-2.90795	0.00363806	0.0317849	1983.18	2412.79	1698.35	1363.25	886.13	933.872
ENSG00000142627	EPHA2	1998.67	-0.909776	0.277454	-3.27187	0.0010684	0.0120773	3725.27	3154.37	1031.57	1941.3	1571.89	567.648
ENSG00000205903	ZNF316	837.576	-0.908043	0.319682	-2.85369	0.00432141	0.0366489	1277.68	894.473	1110.41	581.549	394.312	767.036
ENSG00000167775	CD320	736.718	-0.907073	0.328507	-2.77623	0.00549936	0.0440772	985.479	1007.3	891.267	701.218	439.315	395.726
ENSG00000105443	CYTH2	3201.46	-0.906666	0.27947	-3.25122	0.0011491	0.0128578	4995.17	4075	3471.53	3008.52	1776.55	1881.99
ENSG00000019144	PHLDB1	7591.11	-0.903126	0.269299	-3.34418	0.000825263	0.00977309	11480.2	13078.6	5495.92	5264.03	6937.96	3289.91
ENSG00000109320	NFKB1	2063.67	-0.902333	0.278472	-3.2505	0.00115204	0.0128757	5751.78	1448.82	841.826	3186.97	705.047	447.607
ENSG00000127483	HP1BP3	4310.94	-0.902268	0.272676	-3.31376	0.000920514	0.0107035	5034.06	5529.55	6335.08	2282.11	3222	3462.85
ENSG00000166886	NAB2	2224.63	-0.901778	0.296235	-3.04298	0.00234249	0.0226513	2888.67	3478.14	2409.23	1312.16	1571.89	1687.68
ENSG00000151208	DLG5	2038.42	-0.90149	0.278768	-3.23404	0.00122051	0.0134775	3044.21	2106.18	2868.89	1703.36	1150.79	1357.06
ENSG00000261992	GATAD2B	974.777	-0.899869	0.30728	-2.93128	0.00337566	0.0300878	1324.34	892.02	1614.17	552.157	523.963	942.01
ENSG00000168675	LDLRAD4	2972.57	-0.899742	0.317618	-2.86279	0.00419935	0.035803	3596.39	3923.75	3968.61	1384.24	3179.14	1783.31
ENSG00000205339	IPO7	5020.83	-0.896469	0.285574	-3.13779	0.00170225	0.0174849	6408.39	5252.37	8114.94	2818.17	3621.67	3909.44
ENSG00000183426	NPIPA1	3204.29	-0.894734	0.271423	-3.29851	0.000971978	0.0111806	4398.55	3879.59	4283.96	2442.37	1880.48	2340.78
ENSG00000067113	PPAP2A	1624.1	-0.894606	0.30196	-2.97493	0.00293051	0.0270486	2365.37	1662.22	2303.66	1612.38	851.842	949.131
ENSG00000138448	ITGAV	5710.96	-0.894503	0.302982	-2.95575	0.00311908	0.0282719	8715.99	6237.6	7482.9	3534.78	4835.68	3458.78
ENSG00000139926	FRMD6	3078.06	-0.894432	0.321036	-2.78724	0.00531598	0.0429389	6638.38	3837.08	1694.34	2356.99	3088.06	853.506
ENSG00000133131	MORC4	1227.15	-0.893694	0.313425	-2.84877	0.00438888	0.0370369	1852.08	1280.39	1709.04	765.601	923.633	832.143
ENSG00000198899	MT-ATP6	61641.3	-0.892822	0.320572	-2.7642	0.00570619	0.0454462	55802.4	124372	66719.4	46015.8	41069.5	35868.6
ENSG00000104368	PLAT	1112.41	-0.892573	0.30243	-2.91122	0.00360016	0.0315906	2085.39	1959.01	416.905	1010.54	928.99	273.651
ENSG00000061273	HDAC7	1400.88	-0.890876	0.308797	-2.88465	0.00391855	0.0337676	2123.17	1281.21	2104.57	1286.97	804.696	804.676
ENSG00000139044	B4GALNT3	3307.16	-0.890855	0.284185	-3.14576	0.00165657	0.0170953	4270.78	4852.56	3744.12	1900.71	3208.07	1866.73
ENSG00000185634	SHC4	714.561	-0.888489	0.326989	-2.72818	0.00636847	0.0496022	516.627	1205.17	1060.97	279.927	801.482	423.192
ENSG00000161638	ITGA5	14634.8	-0.886478	0.286056	-3.06693	0.00216271	0.0212978	11242.5	37312.8	10526.8	7867.36	15277.4	5581.87
ENSG00000104067	TJP1	1402.37	-0.885537	0.298221	-2.96466	0.0030302	0.0277095	2268.71	1836.37	1417.74	949.653	1100.43	841.298
ENSG00000144233	AMMECR1L	939.266	-0.881605	0.303058	-2.91485	0.00355857	0.0313541	981.035	1530.58	1153.17	550.757	903.274	516.783
ENSG00000135269	TES	1526.92	-0.877118	0.301448	-2.91428	0.00356515	0.0313964	1952.07	2322.85	1687.66	807.59	1261.16	1130.21
ENSG00000115414	FN1	340035	-0.876838	0.282764	-3.08049	0.00206662	0.0205347	296524	688632	368667	200175	277356	208856
ENSG00000133794	ARNTL	686.299	-0.875541	0.314231	-2.7822	0.00539917	0.0434914	726.611	1095.61	873.896	451.383	538.964	431.331
ENSG00000096717	SIRT1	1042.42	-0.873726	0.319349	-2.73686	0.00620278	0.0485688	1702.09	1135.67	1246.7	674.625	603.254	892.163
ENSG00000108510	MED13	1476.27	-0.873277	0.295358	-2.95382	0.00313863	0.0283907	2034.29	1525.67	2227.5	914.662	1002.92	1152.59
ENSG00000140931	CMTM3	978.031	-0.873234	0.304794	-2.8775	0.00400834	0.034407	1471	1409.57	912.647	955.952	683.617	435.4
ENSG00000020577	SAMD4A	6310.6	-0.872008	0.266994	-3.26503	0.00109452	0.012341	9464.82	7166.42	8028.08	4577.51	3903.47	4723.28
ENSG00000131669	NINJ1	2213.26	-0.871756	0.292092	-2.99158	0.00277537	0.0259972	2932	2546.06	3129.46	2001.48	1290.09	1380.46
ENSG00000157933	SKI	6079.94	-0.869442	0.2695	-3.23153	0.00123128	0.0135625	7093.9	8899.76	7619.2	3441.01	5441.08	3984.72
ENSG00000100097	LGALS1	7115.45	-0.867552	0.289913	-3.00333	0.00267046	0.0252556	13192.3	8633.22	5677.65	8249.46	3360.22	3579.84
ENSG00000116157	GPX7	1533.1	-0.86526	0.290254	-2.97601	0.00292026	0.0270105	2384.26	2081.65	1539.34	1082.62	1163.65	947.097
ENSG00000158805	ZNF276	1208.8	-0.862988	0.288249	-2.99249	0.00276712	0.0259562	1810.97	1565.74	1341.58	930.758	853.985	749.742
ENSG00000197119	SLC25A29	838.423	-0.862956	0.308964	-2.79031	0.00526583	0.0426053	1197.69	722.774	1357.61	533.961	438.243	780.261
ENSG00000154978	VOPP1	2090.76	-0.861944	0.281108	-3.06654	0.00216553	0.0213137	2793.12	2517.44	2835.49	1361.15	1563.32	1474.05
ENSG00000178202	KDELC2	3458.39	-0.854382	0.288299	-2.97605	0.00291987	0.0270105	3811.93	4814.13	4698.19	1838.42	3412.73	2174.96
ENSG00000180340	FZD2	162.502	-0.850189	0.730881	-3.35668	0.000788836	0.00943664	194.429	371.198	339.403	69.9818	0	0
ENSG00000151348	EXT2	3551.55	-0.846509	0.301343	-2.81556	0.00486918	0.040119	4067.46	4348.91	5330.23	2204.43	3241.29	2116.98
ENSG00000141556	TBCD	1850.29	-0.844526	0.287837	-2.94983	0.00317951	0.0287311	3379.74	1956.56	1749.13	2156.14	895.774	964.39
ENSG00000184232	OAF	5374.9	-0.841759	0.266604	-3.16343	0.0015592	0.0163679	7176.11	8578.44	4968.11	4080.64	4956.76	2489.31
ENSG00000196776	CD47	1844.26	-0.840858	0.295357	-2.84367	0.00445973	0.0374444	2180.94	2075.11	2921	1415.03	1235.44	1238.04
ENSG00000008710	PKD1	10899.8	-0.838485	0.300181	-2.79737	0.00515211	0.0418257	17618.6	12183.3	12394.9	7161.94	6176.12	9863.64
ENSG00000131899	LLGL1	1338.49	-0.836871	0.298242	-2.7991	0.0051246	0.0417367	2190.94	1367.06	1659.6	981.145	905.417	926.751
ENSG00000112941	PAPD7	1413.61	-0.83575	0.302116	-2.7668	0.0056609	0.0451466	2153.17	1707.18	1619.51	972.747	876.487	1152.59
ENSG00000011028	MRC2	22328	-0.835192	0.262691	-3.17487	0.00149904	0.0158779	39898	19535.3	27228.4	21413.7	12047.9	13844.3
ENSG00000012061	ERCC1	1839.34	-0.832646	0.279661	-2.97507	0.00292918	0.0270486	2676.46	2841.22	1606.15	1356.95	1625.47	929.803
ENSG00000184216	IRAK1	3003.61	-0.81498	0.294895	-2.77078	0.00559222	0.0446998	4094.13	3552.55	3872.4	2168.74	2638.03	1695.82
ENSG00000196141	SPATS2L	4608.76	-0.81177	0.268911	-3.01968	0.0025304	0.0241249	5980.65	5887.66	5839.34	3003.62	3465.23	3476.08
ENSG00000153250	RBMS1	4401.09	-0.811211	0.27859	-2.91604	0.00354505	0.0312506	5836.22	5202.5	5835.33	3832.2	3024.84	2675.47
ENSG00000108669	CYTH1	1022.53	-0.805406	0.294079	-2.73809	0.00617966	0.0484521	1379.89	1185.55	1366.97	769.1	710.404	723.293
ENSG00000135631	RAB11FIP5	2549.93	-0.804539	0.28825	-2.79597	0.00517447	0.0419686	3058.65	3084.05	3619.85	1479.42	2204.08	1853.5
ENSG00000169908	TM4SF1	10614.9	-0.803937	0.270503	-2.98422	0.00284307	0.0264734	18057.5	18017.8	4302.67	8954.17	12053.3	2304.16
ENSG00000072195	SPEG	1833.7	-0.799046	0.291308	-2.75142	0.00593375	0.0469221	2459.81	2171.59	2358.45	1733.45	1089.72	1189.21
ENSG00000105223	PLD3	20294.6	-0.795289	0.281168	-2.82068	0.00479217	0.0396719	33140.8	19524.7	25637	14305.7	13445.2	15714.1
ENSG00000254681	PKD1P5	2434.85	-0.789573	0.279791	-2.8264	0.00470751	0.0390787	3021.99	2619.65	3643.91	1990.28	1319.02	2014.23
ENSG00000176915	ANKLE2	3939.79	-0.769093	0.271371	-2.82879	0.0046724	0.0388971	6572.83	4308.84	4178.4	3356.33	2645.53	2576.79
ENSG00000183889	NPIPA7	2690	-0.760343	0.271853	-2.79806	0.005141	0.0417773	4114.13	2598.39	3484.89	2490.65	1514.03	1937.94
ENSG00000251634	RP11-1280N14.3	83.9407	-0.734882	0.741443	-2.96464	0.00303036	0.0277095	153.321	196.228	85.5189	0	68.576	0
ENSG00000229058	AGER	37.3394	-0.676987	0.805583	-3.64991	0.000262335	0.00376896	53.3292	49.8747	37.4145	0	0	83.4177
ENSG00000256005	AC093734.1	415.157	-0.594578	0.694589	-3.42645	0.000611528	0.00768523	794.383	914.914	462.336	0	319.307	0
ENSG00000231115	RING1	584.338	-0.453042	0.675622	-3.45296	0.000554476	0.00710993	1144.36	742.396	983.467	0	0	635.806
ENSG00000170835	CEL	27.3388	-0.439691	0.810725	-3.15205	0.00162127	0.0168393	36.6638	29.4342	26.7246	0	0	71.2103
ENSG00000270671	AC245884.2	231.896	-0.359372	0.595766	-3.16228	0.0015654	0.0164135	495.517	709.692	0	0	0	186.164
ENSG00000206492	GNL1	413.42	-0.326372	0.681001	-3.15648	0.00159685	0.0166542	917.707	260.002	629.365	0	0	673.446
ENSG00000236575	ZNF26	154.429	-0.211899	0.696355	-2.78998	0.0052711	0.0426153	187.763	239.562	156.339	342.911	0	0
ENSG00000257026	AC040173.1	39.6008	0.153191	0.803389	-2.73491	0.00623966	0.0488142	37.7749	27.799	17.371	154.66	0	0
ENSG00000257413	YTHDC1	222.915	0.165438	0.595769	2.98818	0.00280645	0.0261911	434.411	0	0	0	416.813	486.264
ENSG00000100075	SLC25A1	2441.98	0.760562	0.276901	2.74549	0.00604203	0.0476268	1785.42	1825.74	1761.15	3463.4	2901.62	2914.53
ENSG00000171105	INSR	2089.91	0.767873	0.280611	2.72665	0.00639809	0.0498109	1109.91	1462.72	1953.57	1676.06	2643.39	3693.78
ENSG00000267645	POLR2J2	116.43	0.771991	0.722626	3.09489	0.00196889	0.0197076	0	58.0508	0	291.124	69.6475	279.755
ENSG00000164880	INTS1	3216.3	0.796565	0.273625	2.9092	0.00362351	0.0317205	2960.88	1790.58	2199.44	5545.36	3377.37	3424.2
ENSG00000067064	IDI1	7079.23	0.799275	0.284452	2.80591	0.00501743	0.0410532	3985.25	5931.81	5283.46	8078	12136.9	7059.99
ENSG00000173852	DPY19L1	1530.35	0.80784	0.288588	2.79686	0.00516017	0.0418718	711.056	1401.4	1165.19	1312.86	2806.26	1785.34
ENSG00000125912	NCLN	1980.97	0.812884	0.286834	2.82733	0.00469381	0.0390017	1404.34	1654.86	1161.19	3009.22	2876.98	1779.24
ENSG00000112972	HMGCS1	11256.3	0.816622	0.274656	2.99741	0.00272288	0.0256589	7341.66	13432.6	4267.93	13381.2	19878.5	9235.97
ENSG00000157593	SLC35B2	2525.87	0.83207	0.273434	3.04118	0.00235655	0.0227375	1600.99	2013.79	1759.82	2710.4	3801.68	3268.55
ENSG00000119138	KLF9	3492.64	0.842634	0.28134	3.00876	0.00262317	0.0248884	3355.3	2712.04	1468.52	5879.17	4235.64	3305.17
ENSG00000235941	HSPA1A	9049.09	0.843698	0.308632	2.82038	0.00479667	0.0396883	7299.44	1748.88	11773.5	13545	4826.04	15101.7
ENSG00000140443	IGF1R	2097.05	0.847151	0.28739	2.93808	0.00330249	0.0296001	1249.9	1589.45	1535.33	1912.6	3499.52	2795.51
ENSG00000163931	TKT	4778.33	0.847246	0.276215	3.05227	0.00227121	0.022083	2589.8	2933.61	4345.43	4229	4936.4	9635.77
ENSG00000122729	ACO1	1165.02	0.847561	0.299257	2.82778	0.00468718	0.0389992	951.038	829.882	665.444	1569.69	1860.12	1113.93
ENSG00000198832	SELM	3003.8	0.847736	0.287488	2.95036	0.00317406	0.0286965	1898.74	2443.86	2021.72	4353.57	3614.17	3690.73
ENSG00000145675	PIK3R1	1403.95	0.850066	0.298467	2.83661	0.00455956	0.0381374	907.708	876.486	1127.78	1354.85	1613.68	2543.22
ENSG00000169217	CD2BP2	1497.09	0.852897	0.304914	2.80321	0.00505974	0.0413009	1199.91	755.478	1218.64	2391.28	1732.62	1684.63
ENSG00000165912	PACSIN3	1034.32	0.856491	0.304128	2.8095	0.00496188	0.040674	662.171	650.006	843.163	989.543	1367.23	1693.79
ENSG00000074800	ENO1	40704.1	0.860301	0.297019	2.88707	0.00388847	0.0335904	29302.2	35626.9	18949.1	36744.7	82239.8	41362
ENSG00000138942	RNF185	920.299	0.861262	0.304217	2.83589	0.00456986	0.0381874	528.848	572.332	844.499	1167.3	1002.92	1405.89
ENSG00000093167	LRRFIP2	1856.58	0.862395	0.28329	3.04797	0.00230393	0.0223396	1135.47	1096.42	1695.68	2411.57	1985.49	2814.84
ENSG00000063660	GPC1	9761.62	0.863641	0.287082	3.02128	0.00251711	0.0240241	5490.69	10034.6	5371.65	13391.7	14344.2	9936.88
ENSG00000253729	PRKDC	3234.5	0.867748	0.297727	2.90244	0.00370263	0.0323011	2275.38	2259.89	2104.57	5876.37	3391.3	3499.48
ENSG00000105254	TBCB	1181.17	0.869873	0.301666	2.89047	0.00384663	0.0333104	726.611	1124.22	642.728	1662.07	1740.12	1191.25
ENSG00000168872	DDX19A	1172.72	0.870394	0.319955	2.73447	0.00624801	0.0488579	1043.25	480.759	954.07	2087.56	1200.08	1270.59
ENSG00000087053	MTMR2	2099.86	0.871262	0.296407	2.92454	0.00344961	0.0305618	1201.02	1486.43	1612.83	1738.35	3519.88	3040.68
ENSG00000260245	ACLY	4643.36	0.871474	0.277491	3.15604	0.00159928	0.0166697	2634.24	5684.08	1670.29	5840.68	8875.23	3155.63
ENSG00000026025	VIM	125026	0.873179	0.281721	3.09361	0.00197737	0.0197559	76148.6	102544	80441.2	118205	171873	200947
ENSG00000198756	COLGALT2	2668.69	0.875167	0.272256	3.20908	0.00133162	0.0144159	881.043	3119.21	1533.99	1574.59	6012.19	2891.14
ENSG00000170421	KRT8	2248.89	0.87619	0.283184	3.10598	0.00189648	0.0191569	1927.63	1887.88	951.397	3569.77	3056.99	2099.69
ENSG00000225737	SKIV2L	685.535	0.879859	0.312722	2.80726	0.00499649	0.0409197	624.396	340.129	451.647	1171.5	575.395	950.148
ENSG00000001630	CYP51A1	5128.87	0.882121	0.274706	3.21785	0.00129155	0.0141119	2955.33	4607.27	3239.03	6415.93	7284.06	6271.59
ENSG00000262057	MCCC2	720.163	0.884897	0.31994	2.77596	0.00550383	0.0440931	473.297	648.37	388.844	951.053	981.494	877.921
ENSG00000184640	SEPT9	4879.8	0.886395	0.299856	2.94272	0.00325339	0.0292341	3271.97	3431.54	3224.33	4263.29	7988.03	7099.66
ENSG00000159210	SNF8	1300.68	0.888958	0.299005	2.96936	0.00298424	0.0274288	902.153	1018.75	758.98	2126.05	1652.25	1345.87
ENSG00000177000	MTHFR	765.096	0.89011	0.326653	2.72844	0.00636354	0.0496022	623.285	429.249	533.157	1004.94	1125.07	874.869
ENSG00000178980	SEPW1	1524.01	0.897334	0.290399	3.09136	0.0019924	0.0198756	1032.14	1214.98	907.302	2254.81	1957.63	1777.2
ENSG00000121766	ZCCHC17	854.549	0.898377	0.304727	2.94501	0.00322941	0.0291076	511.072	708.874	534.493	853.778	1372.59	1146.49
ENSG00000204389	HSPA1A	10145.8	0.898936	0.323883	2.89673	0.00377074	0.0327335	8502.68	1603.35	13047	15720.7	5172.13	16829
ENSG00000269190	FBXO17	2021.53	0.902498	0.287964	3.13386	0.00172524	0.01768	1523.22	1184.73	1456.49	2358.39	2474.09	3132.23
ENSG00000113161	HMGCR	5489.25	0.904274	0.2941	3.03912	0.00237268	0.0228557	2705.35	5140.36	2838.16	3815.41	12987.6	5448.6
ENSG00000153443	UBALD1	726.156	0.90496	0.316268	2.85321	0.00432802	0.036651	425.523	525.728	522.467	711.015	1232.22	939.975
ENSG00000170522	ELOVL6	886.964	0.906732	0.326279	2.77149	0.00558003	0.0446428	465.52	932.084	400.87	652.231	1835.48	1035.6
ENSG00000148834	GSTO1	1196.87	0.90772	0.305232	2.96702	0.00300702	0.0275388	924.373	856.045	648.073	2168.74	1287.94	1296.03
ENSG00000132463	GRSF1	1672.76	0.907836	0.299023	3.04424	0.0023327	0.0225814	977.702	1017.12	1480.55	2222.62	2168.72	2169.88
ENSG00000221968	FADS3	1786.78	0.910371	0.329395	2.73942	0.0061547	0.0482994	1329.9	1051.46	1154.5	3280.05	2541.6	1363.17
ENSG00000127922	SHFM1	1285.78	0.91768	0.321981	2.82966	0.00465979	0.0388103	922.151	810.259	817.774	2323.4	1061.86	1779.24
ENSG00000166681	NGFRAP1	2432.04	0.918167	0.309808	2.96666	0.00301059	0.0275572	1808.75	2089.01	1059.63	4560.02	2766.61	2308.23
ENSG00000146540	C7orf50	1478.44	0.919027	0.333654	2.73692	0.00620166	0.0485688	874.377	930.448	1130.45	2725.09	1281.51	1928.78
ENSG00000102144	PGK1	7915.47	0.922129	0.276021	3.33519	0.000852425	0.0100409	5965.09	6858.99	3165.53	9433.55	15835.7	6233.95
ENSG00000130204	TOMM40	1123.42	0.923077	0.29146	3.16723	0.00153899	0.0162232	797.716	817.617	678.806	1629.18	1474.38	1342.82
ENSG00000155508	CNOT8	1432.14	0.923855	0.294916	3.12849	0.00175708	0.0179645	832.158	814.347	1258.73	1338.05	1882.63	2466.93
ENSG00000087842	PIR	532.544	0.925297	0.341848	2.72846	0.006363	0.0496022	263.313	300.883	545.183	642.433	641.828	801.624
ENSG00000006042	TMEM98	1859.49	0.926618	0.33021	2.81964	0.00480771	0.039761	1481	1508.5	824.455	1899.31	2958.41	2485.24
ENSG00000156709	AIFM1	565.21	0.929341	0.321388	2.88954	0.00385809	0.0333933	411.079	367.928	364.791	832.784	776.837	637.841
ENSG00000131459	GFPT2	3681.68	0.929516	0.314979	2.92156	0.00348278	0.0308093	2257.6	2771.72	2120.6	2893.05	7688.01	4359.09
ENSG00000136830	FAM129B	12625.8	0.930147	0.271873	3.43614	0.000590077	0.00746881	9111.52	11990.4	5192.6	17997.9	19533.4	11928.7
ENSG00000125772	GPCPD1	2716.14	0.930638	0.274907	3.39119	0.000695902	0.00851882	1722.09	2537.88	1322.87	3182.77	4649.24	2881.98
ENSG00000225614	ZNF469	2591.49	0.932783	0.334032	2.76597	0.00567541	0.0452419	1312.12	2859.21	843.163	1500.41	6705.45	2328.58
ENSG00000131471	AOC3	650.002	0.933304	0.325213	2.86356	0.00418914	0.0357332	367.749	598.496	339.403	899.266	1151.86	543.233
ENSG00000139921	TMX1	1749.75	0.935072	0.338469	2.74464	0.00605765	0.0477148	959.926	1008.12	1473.86	1446.52	3392.37	2217.69
ENSG00000174807	CD248	605.531	0.937282	0.334498	2.82679	0.0047017	0.0390489	644.395	428.431	168.365	1307.96	655.758	428.279
ENSG00000197358	BNIP3P1	1085.87	0.941315	0.294515	3.18334	0.00145585	0.0155229	458.853	1306.55	379.49	841.881	2804.11	724.31
ENSG00000214856	KRT16P1	174.796	0.944943	0.782075	2.87859	0.00399455	0.0343382	0	141.448	0	202.947	671.83	32.5533
ENSG00000118418	HMGN3	873.051	0.946892	0.299806	3.15684	0.00159491	0.0166438	617.73	651.641	487.725	1301.66	1256.87	922.682
ENSG00000090013	BLVRB	621.085	0.950071	0.327415	2.91284	0.0035816	0.0315099	403.302	312.33	549.192	826.485	752.193	883.007
ENSG00000110092	CCND1	6824.58	0.953259	0.312222	3.061	0.00220601	0.0215798	5785.11	4714.38	3272.43	7286.51	11581.8	8307.19
ENSG00000128585	MKLN1	1642.18	0.953449	0.337034	2.82468	0.00473274	0.0392513	956.593	950.889	1342.91	1879.01	3003.41	1720.24
ENSG00000105926	MPP6	918.951	0.954427	0.314713	3.03348	0.00241751	0.0232115	518.849	692.522	632.038	1340.85	1304.02	1025.43
ENSG00000084090	STARD7	1506.05	0.955918	0.325769	2.93042	0.00338501	0.030156	1007.7	856.045	1126.44	2254.81	2329.44	1461.84
ENSG00000150867	PIP4K2A	1034.91	0.956561	0.306441	3.11234	0.00185608	0.0188133	667.726	758.749	622.684	1502.51	1681.18	976.598
ENSG00000011201	KAL1	745.473	0.956765	0.309504	3.07872	0.00207894	0.020634	705.501	421.073	339.403	1588.59	787.552	630.719
ENSG00000188763	FZD9	1235.03	0.957594	0.303235	3.13547	0.00171576	0.017593	432.189	1096.42	883.25	706.816	2081.92	2209.55
ENSG00000174227	PIGG	1613.1	0.958511	0.295912	3.23617	0.00121144	0.0134109	1013.26	994.223	1213.3	1714.55	2506.24	2237.02
ENSG00000104723	TUSC3	1380.68	0.958704	0.291703	3.29036	0.00100058	0.0114425	839.935	1113.59	832.473	1879.71	1887.98	1730.41
ENSG00000186575	NF2	1260.77	0.959946	0.296463	3.23338	0.00122333	0.0134876	899.93	811.894	799.067	1898.61	1839.77	1315.36
ENSG00000118960	HS1BP3	452.143	0.961771	0.34984	2.74059	0.00613281	0.0482117	282.2	272.267	335.394	763.502	452.173	607.322
ENSG00000176720	BOK	949.418	0.962832	0.302906	3.16973	0.00152582	0.0161219	658.838	520.005	697.513	1297.46	901.131	1621.56
ENSG00000010704	HFE	760.41	0.965908	0.342172	2.83986	0.00451329	0.0378041	529.959	685.981	319.36	792.894	1252.58	981.684
ENSG00000230055	CISD3	534.005	0.968244	0.329632	2.93402	0.00334599	0.0299022	352.195	331.135	374.145	853.078	633.256	660.221
ENSG00000129422	MTUS1	581.956	0.969965	0.327742	2.97209	0.00295777	0.0272433	273.312	350.758	551.864	669.026	679.331	967.442
ENSG00000148498	PARD3	777.135	0.972452	0.33391	2.89965	0.00373585	0.032496	498.85	440.696	573.244	1458.42	781.123	910.474
ENSG00000171612	SLC25A33	703.685	0.972553	0.342206	2.84212	0.00448143	0.037573	465.52	565.791	356.774	1252.67	773.623	807.728
ENSG00000166797	FAM96A	661.918	0.973187	0.32392	3.00084	0.00269233	0.0254353	355.528	493.023	456.991	714.514	810.054	1141.4
ENSG00000131873	CHSY1	4629.96	0.973917	0.300514	3.20192	0.00136513	0.0147246	2573.13	3925.38	2136.64	4136.63	11338.6	3669.36
ENSG00000047457	CP	81.0952	0.974671	0.750934	3.18957	0.00142486	0.0152569	31.1087	0	0	83.2784	198.227	173.957
ENSG00000139117	CPNE8	565.666	0.974899	0.338131	2.90214	0.00370623	0.0323165	238.87	468.495	435.612	642.433	829.341	779.244
ENSG00000169139	UBE2V2	1082.36	0.976571	0.300935	3.24088	0.0011916	0.0132494	734.388	645.918	757.644	1789.44	1230.08	1336.72
ENSG00000114107	CEP70	351.284	0.978235	0.351462	2.77907	0.00545145	0.0438055	207.762	260.82	220.478	398.896	591.468	428.279
ENSG00000103363	TCEB2	1807.74	0.978774	0.333696	2.93376	0.00334887	0.0299095	1114.36	1455.36	988.812	2980.53	1773.33	2534.07
ENSG00000100325	ASCC2	1407.62	0.980074	0.28639	3.42749	0.000609185	0.00766124	854.378	1288.56	676.134	1652.27	2469.81	1504.57
ENSG00000029993	HMGB3	960.179	0.981035	0.330912	2.9546	0.00313075	0.0283485	662.171	549.439	657.426	1624.98	1377.95	889.111
ENSG00000257727	CNPY2	2441.66	0.982712	0.310765	3.18262	0.00145949	0.0155429	1534.33	2367.82	1050.28	3899.39	3249.86	2548.31
ENSG00000126391	FRMD8	1246.45	0.983424	0.356852	2.75623	0.00584717	0.0464016	1237.68	693.339	509.105	1581.59	2497.67	959.304
ENSG00000090776	EFNB1	873.301	0.984612	0.342939	2.89858	0.00374856	0.0325891	733.277	707.239	320.696	995.142	1512.96	970.494
ENSG00000166337	TAF10	1243.87	0.985662	0.294403	3.34556	0.000821166	0.00973763	812.159	823.341	819.11	1941.3	1571.89	1495.42
ENSG00000182923	CEP63	1009.53	0.985789	0.311331	3.17682	0.00148899	0.0157999	522.182	566.609	936.699	1375.84	1100.43	1555.44
ENSG00000116016	EPAS1	1742.98	0.986684	0.292513	3.34624	0.000819163	0.0097204	661.06	2391.53	315.351	1566.19	5003.9	519.835
ENSG00000125611	CHCHD5	427.191	0.98786	0.358448	2.7426	0.00609553	0.0479843	277.756	259.185	285.954	794.994	486.461	458.798
ENSG00000177700	POLR2L	623.011	0.988944	0.323308	3.05722	0.00223401	0.0217693	392.192	440.696	391.516	971.348	766.122	776.192
ENSG00000204103	MAFB	1211.4	0.989456	0.323282	3.0581	0.00222742	0.021741	919.929	627.93	825.792	1937.1	1777.62	1180.06
ENSG00000188483	IER5L	2159.54	0.991874	0.367103	2.82477	0.00473152	0.0392513	729.944	837.24	3256.4	2368.18	2381.94	3383.5
ENSG00000056972	TRAF3IP2	1935.34	0.994515	0.295646	3.40637	0.000658323	0.00816293	1569.88	1984.36	436.948	3199.57	3279.86	1141.4
ENSG00000072310	SREBF1	3799.4	0.996425	0.285155	3.49855	0.000467801	0.00618261	2983.1	2526.44	2025.73	5414.49	4509.94	5336.7
ENSG00000241978	AKAP2	2613.45	0.996995	0.348963	2.81188	0.00492523	0.04043	2144.28	1539.57	1135.8	3258.35	5921.11	1681.58
ENSG00000136810	TXN	2155.46	0.999281	0.340492	2.94112	0.00327029	0.0293561	1048.81	1972.09	1209.29	3789.52	2806.26	2106.81
ENSG00000003989	SLC7A2	4103.41	1.00034	0.307281	3.28375	0.00102437	0.0116767	2073.17	1803.66	4508.45	4102.33	5421.79	6711.06
ENSG00000136542	GALNT5	1732.72	1.00122	0.301218	3.30754	0.000941205	0.0108905	1008.81	1266.49	1039.59	1629.88	3396.65	2054.92
ENSG00000028528	SNX1	2293.65	1.00383	0.283766	3.53512	0.000407593	0.00549379	1082.14	1622.97	1783.87	2165.24	3959.19	3148.51
ENSG00000008513	ST3GAL1	1768.34	1.00521	0.343303	2.89793	0.00375629	0.0326401	967.703	1359.7	990.148	3312.24	2706.61	1273.65
ENSG00000148154	UGCG	1633.36	1.00701	0.303869	3.32317	0.000890022	0.0104176	1304.34	1223.16	698.85	1991.68	2840.55	1741.6
ENSG00000153048	CARHSP1	2189.21	1.01178	0.319792	3.14902	0.00163817	0.0169762	1219.91	1234.6	1723.74	1846.82	3928.12	3182.08
ENSG00000064393	HIPK2	1945.37	1.0129	0.339135	2.96219	0.00305455	0.0279018	1251.01	1245.23	1155.84	1515.81	3011.99	3492.35
ENSG00000138768	USO1	2604.69	1.0133	0.324361	3.16086	0.00157301	0.0164737	1185.46	2832.23	1293.47	3581.67	3756.68	2978.62
ENSG00000122863	CHST3	11367.5	1.0141	0.281801	3.59912	0.000319296	0.00447664	3228.64	9974.93	8847.19	7175.94	24975.6	14003
ENSG00000178057	NDUFAF3	791.905	1.01472	0.339648	2.97766	0.00290454	0.0269215	471.075	551.074	490.397	1441.63	818.626	978.632
ENSG00000165030	NFIL3	2233.31	1.0175	0.274869	3.70234	0.00021362	0.00315903	1374.34	1887.88	1109.07	2984.03	3796.32	2248.21
ENSG00000151491	EPS8	2020.18	1.02056	0.286455	3.55855	0.000372901	0.00508442	1272.12	1320.45	1318.86	2237.32	3254.14	2718.2
ENSG00000109107	ALDOC	1315.03	1.02181	0.361267	2.81248	0.00491616	0.0403742	569.956	1480.7	454.319	706.816	2973.41	1704.98
ENSG00000117262	GPR89A	404.517	1.02803	0.34519	2.97893	0.0028926	0.026839	281.089	215.033	284.618	638.234	502.533	505.593
ENSG00000124006	OBSL1	9597.1	1.02953	0.296728	3.44981	0.000560972	0.0071724	4917.4	8866.24	4246.55	7083.56	21454.6	11014.2
ENSG00000070759	TESK2	469.911	1.02996	0.33189	3.09323	0.00197987	0.0197618	133.323	331.135	428.931	261.032	698.618	966.425
ENSG00000178719	GRINA	661.171	1.03196	0.36685	2.79403	0.00520564	0.042202	394.414	286.984	553.2	488.473	901.131	1342.82
ENSG00000099977	DDT	918.756	1.03201	0.368141	2.81468	0.00488262	0.0402083	394.414	710.509	664.108	1575.99	1019	1148.52
ENSG00000067182	TNFRSF1A	4665.6	1.03227	0.279562	3.68386	0.000229724	0.00336617	2413.15	3492.86	3003.85	4963.81	8906.31	5213.61
ENSG00000106605	BLVRA	539.24	1.03368	0.344222	2.99239	0.00276805	0.0259562	391.081	381.827	244.531	1088.92	601.111	527.973
ENSG00000142207	URB1	1632.33	1.03373	0.358066	2.88809	0.00387589	0.0335269	787.717	577.238	1778.53	1037.13	2271.58	3341.8
ENSG00000123989	CHPF	15345.3	1.03644	0.296446	3.48508	0.000491998	0.00643973	9562.59	11340.4	8205.8	13784.3	27602.9	21575.7
ENSG00000137513	NARS2	458.607	1.03731	0.353336	2.92766	0.00341523	0.0303639	261.091	251.826	356.774	424.79	731.834	725.327
ENSG00000111684	LPCAT3	1245.43	1.0375	0.295427	3.50345	0.000459274	0.00608814	776.607	967.241	626.693	1426.23	2399.09	1276.7
ENSG00000176171	BNIP3	3767.91	1.03838	0.326283	3.10563	0.00189874	0.0191687	1619.87	3295	1524.64	2196.03	10906.8	3065.09
ENSG00000184076	UQCR10	477.025	1.0411	0.341118	3.0541	0.00225736	0.0219604	272.201	370.381	272.591	547.258	662.187	737.535
ENSG00000156299	TIAM1	1456.65	1.04132	0.305858	3.42566	0.000613314	0.00769672	523.293	1428.38	928.682	1264.57	2249.08	2345.87
ENSG00000124145	SDC4	11380.4	1.04149	0.29177	3.60534	0.000311744	0.00439303	12356.8	7580.13	3039.93	18646.7	18912	7746.66
ENSG00000054654	SYNE2	1987.6	1.04266	0.326948	3.17937	0.00147594	0.0156803	1433.22	1337.62	975.45	3667.05	1760.47	2751.77
ENSG00000133639	BTG1	10954.7	1.04271	0.307638	3.37907	0.000727304	0.00883827	5943.99	7280.06	7457.51	15023	19869.9	10153.6
ENSG00000087111	PIGS	772.559	1.04296	0.318266	3.28148	0.00103266	0.0117485	556.624	402.268	533.157	1051.13	1098.29	993.892
ENSG00000096401	CDC5L	1352.12	1.04365	0.293871	3.54343	0.000394961	0.00533984	699.946	920.637	952.734	1284.17	2311.23	1944.04
ENSG00000143457	GOLPH3L	270.707	1.04412	0.372126	2.80314	0.00506071	0.0413009	159.988	190.505	163.02	318.417	439.315	352.999
ENSG00000129596	CDO1	3186.71	1.04608	0.269866	3.87219	0.000107861	0.00175854	1172.13	1949.2	2982.47	2412.97	4006.34	6597.12
ENSG00000113716	HMGXB3	1573.07	1.04641	0.299138	3.51512	0.000439549	0.0058663	869.933	1512.59	716.221	1949.69	2581.24	1808.74
ENSG00000104884	ERCC2	552.774	1.04723	0.327107	3.20957	0.00132933	0.0144154	411.079	251.008	407.551	844.681	633.256	769.071
ENSG00000182195	LDOC1	883.043	1.04903	0.303916	3.45529	0.0005497	0.00706409	499.961	697.428	505.096	1053.23	1313.66	1228.89
ENSG00000173599	PC	585.131	1.05174	0.357258	2.96768	0.00300059	0.0275085	265.535	548.621	326.041	865.675	811.125	693.791
ENSG00000112699	GMDS	952.338	1.05237	0.364765	2.8866	0.00389423	0.0336237	513.294	784.095	497.078	1783.84	953.635	1182.09
ENSG00000244716	RP11-20O24.4	420.031	1.05242	0.359058	2.91117	0.00360077	0.0315906	295.533	137.36	347.42	878.972	266.803	594.097
ENSG00000157216	SSBP3	1203.36	1.0525	0.292216	3.59904	0.000319392	0.00447664	634.395	908.373	756.308	1230.98	1877.27	1812.81
ENSG00000157557	ETS2	8558.11	1.05519	0.314867	3.33571	0.000850805	0.0100285	4552.98	5440.43	5902.14	10056.4	17213.6	8183.08
ENSG00000138413	IDH1	2160.24	1.05619	0.309556	3.4182	0.000630368	0.00789391	1156.58	1229.7	1766.5	2672.61	3494.16	2641.9
ENSG00000104369	JPH1	1083.19	1.05663	0.372772	2.93163	0.0033719	0.0300695	337.752	527.363	1399.04	1145.6	1505.46	1583.92
ENSG00000088386	SLC15A1	18.831	1.05989	0.791941	2.7529	0.00590692	0.0467706	11.1103	0	0	0	63.2185	38.657
ENSG00000170962	PDGFD	859.646	1.0626	0.370639	2.85324	0.00432758	0.036651	619.952	484.847	479.707	712.415	1394.02	1466.93
ENSG00000176871	WSB2	1983.32	1.063	0.297272	3.58281	0.00033992	0.00471482	1529.88	968.876	1317.53	2900.05	2764.47	2419.11
ENSG00000069399	BCL3	968.308	1.06368	0.358349	3.02449	0.0024905	0.0237959	888.82	788.183	207.116	2215.62	1006.14	703.964
ENSG00000150403	TMCO3	7191.29	1.06731	0.300005	3.56247	0.000367386	0.00502085	3456.4	3449.53	6894.96	6170.3	10931.4	12245.1
ENSG00000105552	BCAT2	680.349	1.07517	0.348517	3.07453	0.00210838	0.0208675	435.522	446.419	375.481	791.494	756.479	1276.7
ENSG00000259006	RP11-566K11.4	45.5226	1.07609	0.795603	3.78496	0.000153734	0.00237903	74.4387	0	0	58.0849	105.007	35.6051
ENSG00000166575	TMEM135	513.707	1.07957	0.37651	2.86201	0.00420968	0.0358391	395.525	294.342	256.557	527.663	1001.85	606.305
ENSG00000135048	TMEM2	2294.04	1.0798	0.349605	3.21141	0.00132085	0.0143514	2696.46	1676.12	422.249	3755.92	3496.3	1717.18
ENSG00000104093	DMXL2	363.978	1.08004	0.392064	2.78834	0.00529795	0.0428127	198.874	344.217	155.003	561.254	458.602	465.919
ENSG00000145990	GFOD1	620.068	1.08133	0.352812	3.09472	0.00196998	0.0197076	414.412	560.885	220.478	697.719	1062.93	763.984
ENSG00000164096	C4orf3	2622.05	1.08267	0.277891	3.89442	9.84349e-05	0.00162578	1594.32	1707.18	1650.25	3798.61	3886.33	3095.61
ENSG00000020633	RUNX3	773.766	1.08314	0.385634	2.9324	0.00336355	0.0300102	823.27	606.672	155.003	1242.88	1084.36	730.414
ENSG00000160877	NACC1	918.056	1.08333	0.305914	3.53882	0.000401923	0.00542565	636.617	679.44	404.878	1166.6	1714.4	906.405
ENSG00000136802	LRRC8A	2728.2	1.08404	0.279612	3.87739	0.000105582	0.00172457	1894.3	2053.04	1211.96	4713.98	3811.32	2684.63
ENSG00000149131	SERPING1	901.982	1.08439	0.339356	3.21341	0.00131171	0.0142791	1012.14	495.476	156.339	2570.43	713.619	463.884
ENSG00000116691	MIIP	677.977	1.08639	0.325842	3.33404	0.000855934	0.0100688	369.971	427.614	474.363	1062.32	806.839	926.751
ENSG00000197535	MYO5A	561.643	1.09025	0.341691	3.22057	0.00127938	0.0140049	541.069	347.487	197.762	939.856	781.123	562.561
ENSG00000198585	NUDT16	1117.96	1.09123	0.30605	3.55892	0.000372381	0.00508124	713.278	530.634	831.137	1222.58	1250.44	2159.71
ENSG00000110841	PPFIBP1	2858.33	1.09199	0.304116	3.57833	0.000345801	0.00478887	1179.91	1597.62	2513.45	2080.56	5031.76	4746.67
ENSG00000151552	QDPR	397.918	1.09355	0.402198	2.75087	0.00594365	0.0469562	357.75	152.894	243.194	512.967	636.471	484.23
ENSG00000165655	ZNF503	1071.79	1.09381	0.318355	3.45605	0.000548154	0.00705367	396.636	1192.9	475.699	1230.28	2250.15	885.042
ENSG00000175895	PLEKHF2	388.892	1.09402	0.348629	3.13572	0.00171433	0.0175885	157.766	269.814	293.971	342.211	703.975	565.613
ENSG00000110881	ASIC1	338.72	1.09441	0.389086	2.84157	0.00448914	0.0376197	288.867	254.279	89.5276	754.404	367.524	277.72
ENSG00000149289	ZC3H12C	647.576	1.09497	0.352607	3.09823	0.00194679	0.0195309	513.294	346.67	331.386	871.974	1209.72	612.408
ENSG00000242265	PEG10	4248.2	1.09583	0.413688	2.8532	0.00432817	0.036651	2129.84	6155.84	773.679	8043.71	5199.99	3186.15
ENSG00000116459	ATP5F1	2664.16	1.09729	0.366753	2.96905	0.00298724	0.0274288	1258.79	1798.76	1693.01	5746.21	2451.59	3036.61
ENSG00000169715	MT1E	1744	1.09904	0.323561	3.39378	0.000689351	0.00847034	806.604	1689.2	758.98	2779.68	3141.64	1287.89
ENSG00000164169	PRMT10	308.675	1.09971	0.393573	2.78247	0.00539463	0.0434747	166.654	217.486	175.046	589.947	381.454	321.463
ENSG00000260189	EXOSC4	305.561	1.10039	0.38471	2.86111	0.00422157	0.0359057	174.431	155.347	233.841	535.361	360.024	374.363
ENSG00000109472	CPE	5475.86	1.10281	0.323988	3.41032	0.000648868	0.00808109	2492.03	3759.4	3976.63	9263.49	7007.61	6356.02
ENSG00000072401	UBE2D1	436.118	1.10638	0.386151	2.85193	0.00434543	0.0367468	225.538	253.461	305.997	575.95	852.914	402.847
ENSG00000241685	ARPC1A	1379.58	1.10748	0.338363	3.28351	0.00102523	0.011679	746.609	1202.71	628.029	2522.84	1695.11	1482.19
ENSG00000119508	NR4A3	1357.73	1.10948	0.293063	3.78742	0.000152217	0.00236593	1134.36	1012.21	384.835	2168.74	2587.67	858.592
ENSG00000014641	MDH1	1917.04	1.11064	0.328306	3.37566	0.000736393	0.00891192	1001.03	1370.33	1130.45	3618.76	2296.22	2085.44
ENSG00000228300	C19orf24	433.977	1.11112	0.351938	3.14842	0.00164157	0.0170001	257.758	246.92	287.29	776.798	472.531	562.561
ENSG00000149541	B3GAT3	1195.33	1.11781	0.288464	3.8738	0.00010715	0.00174857	862.156	718.686	637.383	1972.79	1594.39	1386.57
ENSG00000262666	FAM189B	972.961	1.11957	0.332638	3.37173	0.000746971	0.00900906	457.742	712.962	632.038	1570.39	1301.87	1162.76
ENSG00000159228	CBR1	310.32	1.11969	0.374783	2.99486	0.00274568	0.0257874	127.768	152.894	293.971	261.732	465.031	560.527
ENSG00000138764	CCNG2	1639.04	1.12199	0.313913	3.57353	0.000352202	0.00485245	699.946	771.831	1566.06	1265.97	2522.31	3008.13
ENSG00000177556	ATOX1	415.647	1.12752	0.407865	2.7715	0.00557986	0.0446428	187.763	355.664	207.116	821.587	484.318	437.434
ENSG00000215126	CBWD7	391.252	1.12999	0.370677	2.99716	0.00272509	0.0256589	304.421	171.7	188.409	1015.44	325.736	341.809
ENSG00000150347	ARID5B	1828.06	1.13023	0.295271	3.83206	0.000127075	0.00202689	1413.22	1398.94	559.881	2489.95	3751.32	1355.03
ENSG00000115594	IL1R1	9876.84	1.13103	0.318158	3.57344	0.000352316	0.00485245	7262.77	8248.94	2719.23	10034.7	22633.3	8362.12
ENSG00000176170	SPHK1	2136.82	1.13201	0.406092	2.88407	0.00392569	0.0338127	2470.92	908.373	792.386	2255.51	3238.07	3155.63
ENSG00000120875	DUSP4	709.832	1.13506	0.355935	3.23921	0.00119863	0.0132941	276.645	888.75	211.125	527.663	1544.03	810.78
ENSG00000163710	PCOLCE2	2916.85	1.13665	0.305112	3.72073	0.000198645	0.00296069	1673.2	1599.26	2031.07	5297.62	3532.73	3367.23
ENSG00000261011	RP11-96C23.11	22.0157	1.13667	0.804958	2.817	0.00484746	0.0400094	0	31.8871	0	29.3924	52.5035	18.3112
ENSG00000111199	TRPV4	2785.04	1.13762	0.344256	3.40765	0.000655248	0.00813674	551.069	2194.48	2820.79	2282.11	4728.53	4133.25
ENSG00000179295	PTPN11	6211.15	1.1388	0.31795	3.56821	0.000359423	0.0049311	3911.92	3366.95	3837.66	5555.86	10888.6	9705.96
ENSG00000039319	ZFYVE16	2219.62	1.1399	0.302548	3.76176	0.000168724	0.00257713	1444.33	1232.15	1352.27	3145.68	3797.4	2345.87
ENSG00000103485	QPRT	2222.79	1.14022	0.279105	4.09051	4.30425e-05	0.000784011	1889.85	1078.44	1161.19	3836.4	2424.8	2946.07
ENSG00000114923	SLC4A3	553	1.14219	0.388236	2.93975	0.00328477	0.0294711	349.973	431.702	203.107	443.685	1114.36	775.175
ENSG00000133059	DSTYK	1739.36	1.1445	0.312677	3.66748	0.000244953	0.00355324	822.159	1437.37	946.053	2732.79	2641.25	1856.55
ENSG00000111716	LDHB	8954.25	1.14511	0.270399	4.23691	2.26621e-05	0.000447588	5627.34	4747.9	6129.3	13344.1	12145.5	11731.4
ENSG00000183311	TUBB	13087.4	1.14563	0.274939	4.16867	3.06377e-05	0.000585465	7689.41	9485.18	6910.99	15566.1	19224.8	19647.9
ENSG00000171310	CHST11	3853.47	1.14776	0.351895	3.1694	0.00152755	0.0161219	1482.11	3313.8	1421.75	1715.25	11034.3	4153.59
ENSG00000160588	MPZL3	505.876	1.1531	0.350643	3.34174	0.000832559	0.00984628	147.766	596.861	231.168	407.994	993.28	658.186
ENSG00000111077	TENC1	6718.42	1.15974	0.292967	3.94473	7.98891e-05	0.00135896	3103.09	5639.11	3243.04	5236.74	13294.1	9794.46
ENSG00000101190	TCFL5	622.443	1.16114	0.330536	3.52636	0.000421308	0.00565707	289.978	511.828	342.076	826.485	931.133	833.16
ENSG00000225697	SLC26A6	1015.75	1.16139	0.315402	3.6817	0.000231685	0.00338087	459.964	537.992	841.826	933.558	1683.33	1637.84
ENSG00000135900	MRPL44	525.308	1.16171	0.360661	3.23408	0.00122037	0.0134775	225.538	323.776	406.215	827.185	640.757	728.379
ENSG00000101104	PABPC1L	531.157	1.16344	0.405341	2.90257	0.00370111	0.0323011	193.318	302.518	470.354	940.556	632.185	648.013
ENSG00000121578	B4GALT4	1788.8	1.16416	0.283476	4.10437	4.0542e-05	0.000742727	1049.92	1097.24	1091.7	2107.85	2705.54	2680.56
ENSG00000110693	SOX6	2045.53	1.16686	0.292973	3.96729	7.26949e-05	0.00125105	705.501	1541.21	1358.95	1515.81	4527.09	2624.61
ENSG00000122862	SRGN	417.978	1.16775	0.348435	3.37946	0.000726274	0.00883288	371.082	280.443	120.261	713.815	681.474	340.792
ENSG00000120899	PTK2B	371.471	1.16806	0.36838	3.19974	0.00137554	0.0148097	203.318	344.217	137.632	461.18	645.043	437.434
ENSG00000161714	PLCD3	1830.46	1.16841	0.367486	3.18008	0.00147232	0.0156513	1003.26	792.271	1441.79	2022.47	3693.46	2029.49
ENSG00000162878	PKDCC	1966.16	1.1711	0.295354	3.96594	7.31064e-05	0.00125608	1099.92	1403.03	1051.61	2329.69	2738.75	3173.94
ENSG00000180822	PSMG4	545.518	1.17685	0.352702	3.33352	0.000857559	0.0100791	273.312	434.972	260.565	962.95	834.698	506.61
ENSG00000018625	ATP1A2	384.685	1.17958	0.444564	2.93593	0.00332552	0.0297461	719.944	46.6042	81.5102	973.447	288.233	198.371
ENSG00000161981	SNRNP25	512.893	1.17979	0.362279	3.27933	0.00104054	0.0118107	416.634	310.695	205.78	669.726	753.264	721.258
ENSG00000172296	SPTLC3	637.91	1.18028	0.320853	3.69049	0.000223825	0.00329006	186.652	480.759	487.725	484.974	1230.08	957.269
ENSG00000173175	ADCY5	490.044	1.18365	0.437988	2.79834	0.00513653	0.0417773	516.627	143.901	255.22	549.357	745.764	729.397
ENSG00000055118	KCNH2	591.166	1.18389	0.501989	2.79789	0.00514379	0.0417773	1003.26	230.568	64.1392	895.767	688.974	664.29
ENSG00000124216	SNAI1	2267.08	1.18761	0.27602	4.30236	1.68992e-05	0.000344163	872.155	1781.59	1415.07	2091.76	4392.08	3049.83
ENSG00000130309	COLGALT1	7160.51	1.18811	0.279884	4.23531	2.28238e-05	0.000450278	3666.38	5087.21	3909.82	6716.16	12841.9	10741.6
ENSG00000164309	CMYA5	631.307	1.18875	0.319813	3.72348	0.000196496	0.0029353	402.191	448.054	285.954	888.069	977.208	786.365
ENSG00000146373	RNF217	1106.84	1.19192	0.351686	3.4022	0.000668449	0.00825371	466.631	669.629	843.163	1858.02	1526.89	1276.7
ENSG00000089220	PEBP1	5264.59	1.19347	0.292425	4.08817	4.34796e-05	0.000789834	2810.89	4001.42	2683.15	8301.24	6885.46	6905.36
ENSG00000188677	PARVB	755.474	1.19421	0.33534	3.55773	0.00037407	0.00509641	385.526	459.501	486.389	1338.05	898.988	964.39
ENSG00000125637	PSD4	1679.45	1.19453	0.377413	3.09882	0.00194293	0.0195033	775.496	1264.85	710.876	878.272	3550.95	2896.22
ENSG00000136490	LIMD2	315.937	1.19523	0.412674	2.95949	0.00308146	0.0280605	286.645	208.492	84.1826	559.155	367.524	389.622
ENSG00000137332	DDR1	332.364	1.19713	0.379403	3.1256	0.0017744	0.0180974	106.658	253.461	196.426	248.435	844.342	344.861
ENSG00000185033	SEMA4B	792.124	1.20101	0.357046	3.35345	0.000798104	0.00950244	769.941	342.582	277.936	1471.72	1396.16	494.403
ENSG00000067533	RRP15	691.059	1.20215	0.33698	3.54371	0.000394544	0.00533828	417.746	424.343	342.076	1156.8	1240.8	564.596
ENSG00000156313	RPGR	410.078	1.20343	0.349366	3.44752	0.000565769	0.00720244	169.987	380.192	175.046	349.909	860.414	524.921
ENSG00000070159	PTPN3	559.499	1.20541	0.381053	3.17593	0.00149355	0.0158388	233.315	271.449	483.716	1025.93	558.251	784.33
ENSG00000117632	STMN1	3400.54	1.20739	0.311218	3.91062	9.20611e-05	0.00153641	1324.34	3173.99	1777.19	4447.35	5164.63	4515.75
ENSG00000171791	BCL2	633.392	1.20769	0.367044	3.30355	0.000954685	0.0110248	487.74	260.82	370.136	688.621	867.915	1125.12
ENSG00000173041	ZNF680	232.523	1.21141	0.386897	3.13877	0.0016966	0.0174675	82.2159	143.901	181.728	216.244	340.737	430.313
ENSG00000166171	DPCD	339.389	1.21199	0.371348	3.28645	0.00101458	0.0115802	196.651	282.078	128.278	456.981	559.323	413.02
ENSG00000070214	SLC44A1	2951.67	1.21293	0.322088	3.76413	0.00016713	0.00255942	1973.18	1421.84	1767.84	3081.3	5086.41	4379.43
ENSG00000138442	WDR12	395.869	1.213	0.360901	3.37768	0.000731008	0.00886498	163.321	213.398	330.049	547.958	471.46	649.031
ENSG00000086200	IPO11	448.726	1.21352	0.350796	3.45114	0.000558228	0.00714767	263.313	288.619	224.487	848.88	561.466	505.593
ENSG00000051523	CYBA	976.242	1.21415	0.404453	3.09393	0.00197523	0.0197489	674.392	891.203	232.504	1811.13	1045.78	1202.44
ENSG00000165175	MID1IP1	1861.16	1.21526	0.286854	4.24097	2.22556e-05	0.000440545	913.263	1081.71	1322.87	2438.17	2775.18	2635.8
ENSG00000136717	BIN1	3338.65	1.2171	0.298268	4.0781	4.54043e-05	0.000819737	1685.43	1904.23	2271.6	5626.54	3637.74	4906.39
ENSG00000079459	FDFT1	4759.39	1.21766	0.295232	4.11304	3.90487e-05	0.000721216	2649.8	3212.42	2378.49	4512.43	9040.24	6762.94
ENSG00000204580	DDR1	993.933	1.22162	0.421689	2.97105	0.00296786	0.0273219	859.934	665.54	227.16	841.881	2288.72	1080.36
ENSG00000243927	MRPS6	3219.73	1.22315	0.31107	3.95169	7.76016e-05	0.0013226	1388.78	1646.68	2767.34	4867.24	3948.48	4699.88
ENSG00000086544	ITPKC	8861.92	1.22585	0.320553	3.94575	7.95491e-05	0.00135448	8037.16	8037.18	1072.99	13988.7	17634.7	4400.79
ENSG00000163251	FZD5	181.083	1.231	0.456567	2.74031	0.00613818	0.0482125	64.4395	94.8436	157.675	251.235	291.448	226.856
ENSG00000103175	WFDC1	558.715	1.23179	0.363865	3.41008	0.000649435	0.00808109	383.304	416.167	187.073	628.437	1021.14	716.172
ENSG00000125534	PPDPF	3516.64	1.23206	0.295459	4.18488	2.85316e-05	0.000553607	1527.66	2924.62	1844	4196.81	5157.13	5449.62
ENSG00000168916	ZNF608	442.735	1.23232	0.344202	3.56794	0.000359797	0.00493241	394.414	210.945	146.986	1096.62	416.813	390.639
ENSG00000161542	PRPSAP1	1504.37	1.23258	0.330802	3.76181	0.000168691	0.00257713	882.154	504.47	1346.92	1852.42	1986.56	2453.7
ENSG00000148175	STOM	2184.76	1.23333	0.327826	3.74011	0.000183942	0.00277636	1505.44	1121.77	1055.62	3226.16	4387.79	1811.79
ENSG00000158716	DUSP23	216.412	1.23433	0.424417	2.93399	0.00334637	0.0299022	113.325	174.97	88.1913	324.716	283.947	313.325
ENSG00000102554	KLF5	984.705	1.23703	0.340598	3.61696	0.000298087	0.00422079	857.712	298.43	498.415	2528.44	963.278	761.95
ENSG00000184602	SNN	442.429	1.23712	0.387474	3.18066	0.00146942	0.0156299	197.763	284.531	263.238	804.091	707.19	397.76
ENSG00000109576	AADAT	247.876	1.24079	0.433015	2.92609	0.00343256	0.030472	69.9946	206.857	163.02	343.611	378.239	325.533
ENSG00000154743	TSEN2	259.82	1.24123	0.38866	3.20437	0.00135357	0.0146267	126.657	218.304	105.562	411.493	443.601	253.305
ENSG00000004399	PLXND1	3006.26	1.24227	0.30268	4.12205	3.75514e-05	0.000697941	2239.83	2006.43	1101.06	5141.56	3748.11	3800.59
ENSG00000007237	GAS7	1471.95	1.24279	0.377062	3.31367	0.000920802	0.0107035	1166.58	777.554	597.296	1398.24	2470.88	2421.15
ENSG00000261737	RP4-612B15.3	17.9868	1.24315	0.812734	3.10219	0.00192093	0.0192934	0	0	16.0348	47.5876	31.0735	13.2248
ENSG00000120693	SMAD9	1181.64	1.24341	0.396613	3.10378	0.00191066	0.0192122	759.941	589.502	574.58	813.889	2351.94	1999.99
ENSG00000198954	KIAA1279	1514.22	1.24419	0.341745	3.6447	0.000267709	0.00383141	625.507	829.882	1150.5	1736.25	3047.35	1695.82
ENSG00000050327	ARHGEF5	487.647	1.24665	0.341177	3.68345	0.000230098	0.00336885	148.877	491.388	233.841	405.895	963.278	682.601
ENSG00000100600	LGMN	3249.55	1.24671	0.280494	4.43732	9.10869e-06	0.000197825	2075.4	1945.11	1571.41	6166.8	4203.49	3535.08
ENSG00000165410	CFL2	1014.18	1.24967	0.444551	2.90102	0.00371948	0.032416	245.537	578.873	968.769	1913.3	1230.08	1148.52
ENSG00000101474	APMAP	2193.29	1.25011	0.283327	4.40685	1.04884e-05	0.000224478	1332.12	1346.62	1103.73	3870.69	3096.63	2409.96
ENSG00000010810	FYN	646.02	1.25325	0.374434	3.33814	0.000843415	0.00996132	287.756	385.915	408.887	1303.06	787.552	702.947
ENSG00000005513	SOX8	4666.56	1.25357	0.293206	4.29076	1.78059e-05	0.000361378	1775.42	3348.14	3129.46	5805.69	6247.92	7692.74
ENSG00000137507	LRRC32	212.952	1.25627	0.477496	2.93665	0.00331781	0.0296922	338.863	75.2208	20.0435	475.177	244.302	124.109
ENSG00000115687	PASK	201.384	1.25658	0.427326	2.94172	0.00326393	0.029314	137.767	130.819	66.8116	443.685	219.657	209.562
ENSG00000260383	MROH1	371.625	1.25707	0.365446	3.45588	0.00054849	0.00705367	271.09	147.171	228.496	543.059	507.891	532.042
ENSG00000125967	NECAB3	566.046	1.25812	0.366101	3.44782	0.000565131	0.00720175	397.747	231.386	344.748	642.433	898.988	880.973
ENSG00000183779	ZNF703	1929.89	1.25989	0.346945	3.60793	0.000308645	0.00435632	966.592	683.528	1533.99	1344.35	2554.46	4496.42
ENSG00000124406	ATP8A1	571.894	1.26379	0.352545	3.56952	0.000357643	0.0049105	208.873	425.161	319.36	452.782	819.697	1205.49
ENSG00000139946	PELI2	133.655	1.26687	0.45692	2.75793	0.00581685	0.0462025	56.6623	82.5793	78.8377	133.665	272.161	178.026
ENSG00000196781	TLE1	1083.92	1.2678	0.345533	3.68459	0.000229069	0.00335936	485.518	518.369	872.56	1893.71	1345.8	1387.58
ENSG00000100994	PYGB	7114.23	1.26817	0.279735	4.54475	5.50015e-06	0.000126289	2760.9	4052.93	5673.64	7601.43	11571.1	11025.4
ENSG00000136457	CHAD	6841.59	1.26839	0.327122	3.91645	8.98606e-05	0.00150395	2243.16	5942.44	4050.12	9657.49	10410.7	8745.64
ENSG00000137267	TUBB2A	9384.33	1.26967	0.336768	3.81454	0.000136437	0.00215673	6032.87	8081.33	2580.26	9849.24	18045.1	11717.1
ENSG00000225840	AC010970.2	7058.22	1.27009	0.378535	3.27843	0.00104387	0.0118303	3965.25	3366.95	3400.71	8460.1	18614.1	4542.2
ENSG00000176678	FOXL1	951.676	1.27337	0.374795	3.4326	0.000597824	0.00755063	254.425	1117.68	318.023	1291.86	2165.5	562.561
ENSG00000158445	KCNB1	23.6848	1.27599	0.809833	2.8853	0.00391043	0.0337306	0	0	22.716	87.4773	7.5005	24.4149
ENSG00000117318	ID3	4635.72	1.27636	0.28652	4.46971	7.8327e-06	0.000173746	1928.74	2452.85	3760.16	5751.81	6760.09	7160.7
ENSG00000071991	CDH19	544.393	1.27657	0.487702	2.97617	0.00291873	0.0270105	39.9969	545.351	444.965	468.178	1162.58	605.287
ENSG00000198682	PAPSS2	21670.5	1.27657	0.3795	3.19526	0.00139703	0.0150227	5697.34	12395.1	11518.3	8216.57	71313.7	20881.9
ENSG00000114268	PFKFB4	266.569	1.27717	0.442497	2.85371	0.00432114	0.0366489	81.1048	241.197	106.899	394.697	630.042	145.472
ENSG00000136110	LECT1	10003.7	1.2775	0.421983	3.44521	0.000570615	0.00725889	642.173	14753.9	5747.14	5487.27	19325.6	14066.1
ENSG00000096968	JAK2	1103.83	1.27813	0.293261	4.36031	1.29881e-05	0.000273664	528.848	684.346	684.151	1432.53	1691.9	1601.21
ENSG00000156928	MALSU1	643.073	1.27974	0.32588	3.93633	8.27357e-05	0.0014003	329.975	298.43	481.044	867.775	909.703	971.511
ENSG00000163399	ATP1A1	18436.5	1.28037	0.281188	4.5481	5.41328e-06	0.000124618	10171.4	9167.12	11948.6	19347.2	27757.2	32227.7
ENSG00000085491	SLC25A24	804.834	1.28042	0.366711	3.47546	0.000509973	0.00662589	494.406	394.909	431.603	704.717	1522.6	1280.77
ENSG00000104524	PYCRL	325.082	1.28048	0.42153	3.00236	0.00267898	0.0253227	159.988	172.517	185.736	587.847	604.326	240.08
ENSG00000217930	PAM16	178.793	1.28112	0.418154	3.0596	0.00221634	0.0216449	107.769	100.567	88.1913	309.32	220.729	246.184
ENSG00000133835	HSD17B4	2853.64	1.28174	0.28631	4.4767	7.58069e-06	0.000169005	1524.33	1814.29	1539.34	3895.89	3662.39	4685.64
ENSG00000167157	PRRX2	1378.37	1.28197	0.355422	3.59909	0.000319337	0.00447664	719.944	1060.45	495.742	3149.18	1620.11	1224.82
ENSG00000101230	ISM1	497.483	1.28323	0.470499	2.92742	0.00341784	0.0303679	607.731	213.398	106.899	578.05	777.909	700.912
ENSG00000164066	INTU	581.632	1.28467	0.368769	3.49913	0.000466771	0.00617362	235.537	460.319	295.307	1016.84	816.483	665.307
ENSG00000008283	CYB561	256.383	1.2867	0.408604	3.20395	0.00135556	0.0146392	256.647	127.548	64.1392	547.258	271.089	271.616
ENSG00000182511	FES	262.493	1.28989	0.400103	3.22978	0.00123884	0.0136191	178.875	140.63	118.925	322.616	383.597	430.313
ENSG00000184898	RBM43	159.045	1.29015	0.438489	2.9227	0.00347013	0.0307283	72.2166	87.485	96.2087	168.656	195.013	334.688
ENSG00000131437	KIF3A	768.15	1.29195	0.407973	3.07297	0.00211941	0.0209415	378.86	322.959	419.577	2238.72	574.324	674.463
ENSG00000163293	NIPAL1	235.02	1.29246	0.421983	3.05032	0.00228594	0.0222018	102.214	205.222	77.5015	440.886	429.671	154.628
ENSG00000105889	STEAP1B	131.568	1.29818	0.476332	2.81888	0.00481912	0.0398181	24.4426	116.102	85.5189	107.772	237.873	217.7
ENSG00000157502	MUM1L1	173.515	1.29944	0.432364	3.02393	0.00249512	0.0238271	66.6615	94.026	129.615	235.139	238.944	276.703
ENSG00000138363	ATIC	911.686	1.29966	0.354146	3.62833	0.000285263	0.00405547	522.182	434.155	474.363	2242.22	978.279	818.918
ENSG00000168404	MLKL	175.103	1.30022	0.460692	2.7511	0.00593962	0.0469453	95.5482	128.366	32.0696	158.159	556.108	80.3659
ENSG00000011465	DCN	53680.6	1.30135	0.307523	4.26092	2.03583e-05	0.000407558	17568.6	34621.2	41625	70969.3	68328.5	88971.1
ENSG00000170412	GPRC5C	1766.39	1.30184	0.289276	4.51784	6.24738e-06	0.000141787	562.179	1227.24	1272.09	1743.95	2783.76	3009.14
ENSG00000003436	TFPI	909.581	1.3031	0.427718	3.11111	0.00186387	0.0188598	685.503	632.836	225.823	1071.42	1158.29	1683.61
ENSG00000153976	HS3ST3A1	667.84	1.30546	0.318447	4.08409	4.42494e-05	0.000802169	247.759	436.608	415.568	533.262	1156.15	1217.7
ENSG00000110315	RNF141	434.322	1.30873	0.346622	3.78515	0.000153619	0.00237903	293.311	169.247	271.255	610.242	531.464	730.414
ENSG00000138166	DUSP5	2088.36	1.31246	0.342681	3.72297	0.000196895	0.00293879	1179.91	1386.68	547.855	3754.52	4886.04	775.175
ENSG00000162645	GBP2	197.368	1.31247	0.49836	2.85007	0.00437093	0.036927	263.313	74.4032	29.3971	410.093	222.872	184.129
ENSG00000165152	TMEM246	361.876	1.31395	0.372954	3.51199	0.000444772	0.00592704	202.207	185.599	201.771	366.005	623.613	592.062
ENSG00000186193	SAPCD2	240.99	1.31553	0.405696	3.2715	0.00106979	0.0120776	153.321	174.152	77.5015	407.994	346.094	286.876
ENSG00000187837	HIST1H1C	298.41	1.31781	0.395953	3.36016	0.000778965	0.00933753	98.8813	224.027	181.728	417.092	461.816	406.916
ENSG00000116574	RHOU	751.703	1.32289	0.414488	3.16657	0.00154249	0.0162505	276.645	412.079	479.707	1789.44	723.262	829.091
ENSG00000176834	VSIG10	214.107	1.32313	0.421986	3.0955	0.00196481	0.019681	143.322	88.3027	100.217	520.665	257.16	174.974
ENSG00000105607	GCDH	376.745	1.3235	0.350244	3.78236	0.000155347	0.0024019	194.429	247.738	184.4	555.656	561.466	516.783
ENSG00000119013	NDUFB3	465.996	1.32508	0.424823	3.03632	0.00239482	0.0230564	213.317	266.543	200.435	1276.47	521.82	317.394
ENSG00000151692	RNF144A	783.029	1.32546	0.368315	3.57604	0.000348837	0.0048158	442.188	477.488	322.032	634.735	1684.4	1137.33
ENSG00000184838	PRR16	449.836	1.32602	0.415874	3.27158	0.00106948	0.0120776	452.187	191.322	142.977	588.547	693.26	630.719
ENSG00000159248	GJD2	66.092	1.32606	0.766817	3.31442	0.000918348	0.0106961	5.55513	0	0	22.3942	207.871	160.732
ENSG00000170379	FAM115C	271.173	1.33031	0.412636	3.24656	0.00116809	0.0130373	175.542	181.511	89.5276	306.52	484.318	389.622
ENSG00000026559	KCNG1	668.192	1.33042	0.411345	3.3247	0.000885135	0.0103777	532.181	152.077	475.699	838.382	957.921	1052.89
ENSG00000138660	AP1AR	611.813	1.33257	0.41302	3.3088	0.000936981	0.0108558	344.418	156.983	553.2	1110.61	805.768	699.895
ENSG00000068079	IFI35	164.912	1.33359	0.427291	3.12277	0.00179159	0.0182329	78.8828	99.7493	88.1913	240.737	235.73	246.184
ENSG00000105173	CCNE1	209.554	1.33379	0.42168	3.16488	0.00155147	0.0163061	89.993	126.731	121.597	369.504	264.66	284.841
ENSG00000141179	PCTP	216.015	1.3352	0.432911	3.1086	0.00187976	0.0190097	84.4379	99.7493	171.038	371.603	273.232	296.031
ENSG00000096060	FKBP5	18970.5	1.33749	0.264048	5.05629	4.27481e-07	1.28391e-05	6477.28	9593.92	15172.9	14824.3	27225.7	40528.8
ENSG00000196136	SERPINA3	10114.7	1.33798	0.358734	3.7143	0.00020377	0.00302418	3004.21	8667.56	4520.47	14802.6	23400.5	6292.95
ENSG00000134815	DHX34	760.543	1.33912	0.316075	4.22525	2.3868e-05	0.00046983	424.412	352.393	461	1289.77	745.764	1289.92
ENSG00000145725	PPIP5K2	2572.67	1.33972	0.38364	3.39723	0.000680723	0.00838181	971.036	1312.28	1348.26	1958.09	7781.23	2065.1
ENSG00000172197	MBOAT1	1106.73	1.34055	0.308372	4.35362	1.33909e-05	0.000281146	623.285	734.22	487.725	1504.61	1621.18	1669.37
ENSG00000116661	FBXO2	5197.05	1.34125	0.277719	4.84981	1.23582e-06	3.3012e-05	1550.99	4063.56	3279.11	4948.41	8998.46	8341.77
ENSG00000005469	CROT	470.659	1.34305	0.391888	3.38054	0.000723444	0.00880956	223.316	236.291	256.557	369.504	1120.79	617.495
ENSG00000135899	SP110	190.212	1.34907	0.419198	3.24519	0.00117373	0.0130836	83.3269	163.523	66.8116	279.927	349.309	198.371
ENSG00000106853	PTGR1	435.258	1.35034	0.345097	3.9138	9.08554e-05	0.00151772	206.651	263.273	241.858	690.021	647.186	562.561
ENSG00000129951	LPPR3	275.356	1.35118	0.455214	2.81405	0.00489223	0.0402526	297.755	48.2394	34.742	1065.12	55.718	150.559
ENSG00000103657	HERC1	2616.1	1.35257	0.393948	3.35825	0.000784368	0.00938955	1177.69	1041.64	1648.91	1394.74	5716.45	4717.17
ENSG00000148702	HABP2	26.92	1.35521	0.800639	2.75031	0.00595393	0.0469743	0	30.2518	1.33623	40.5895	56.7895	32.5533
ENSG00000137941	TTLL7	200.94	1.35783	0.43638	3.08561	0.00203136	0.0202186	141.1	90.7555	78.8377	328.915	410.384	155.645
ENSG00000168101	NUDT16L1	715.682	1.36096	0.325883	4.17325	3.0028e-05	0.000576309	384.415	349.123	427.594	844.681	1234.37	1053.91
ENSG00000118804	FAM47E-STBD1	196.331	1.36232	0.440773	3.10383	0.0019103	0.0192122	69.9946	100.567	142.977	335.913	212.157	316.377
ENSG00000160886	LY6K	114.706	1.36581	0.51786	2.8317	0.00463016	0.0386	116.658	65.4094	9.35363	280.627	151.081	65.1065
ENSG00000174628	IQCK	122.096	1.36837	0.481872	2.84582	0.00442968	0.0372274	43.33	86.6674	60.1305	184.752	233.587	124.109
ENSG00000180817	PPA1	1932	1.36974	0.305526	4.47859	7.51391e-06	0.000168154	937.705	971.329	1210.63	3521.49	2145.14	2805.68
ENSG00000050767	COL23A1	1019.46	1.37094	0.447939	3.07693	0.00209144	0.0207231	757.719	478.306	331.386	677.424	2093.71	1778.22
ENSG00000059691	PET112	253.86	1.37502	0.466471	2.88629	0.00389811	0.0336408	116.658	147.989	97.545	696.319	196.084	268.564
ENSG00000167508	MVD	3745.2	1.3792	0.278014	4.97694	6.45968e-07	1.84263e-05	1724.31	3258.2	1294.81	5164.66	7254.05	3775.16
ENSG00000181274	FRAT2	219.142	1.37999	0.404603	3.43119	0.000600949	0.00758467	79.9938	104.655	171.038	264.531	318.235	376.397
ENSG00000121060	TRIM25	899.026	1.38034	0.348914	3.93616	8.27952e-05	0.0014003	577.733	414.532	408.887	1360.45	1846.19	786.365
ENSG00000103319	EEF2K	1442.33	1.38166	0.341068	4.06247	4.85565e-05	0.000866898	797.716	530.634	1011.53	1594.19	2467.66	2252.28
ENSG00000158006	PAFAH2	399.584	1.38507	0.356821	3.91014	9.22431e-05	0.001538	103.325	272.267	280.609	361.106	778.98	601.218
ENSG00000172216	CEBPB	7014.67	1.38723	0.366283	3.80931	0.000139353	0.00219106	3756.38	2182.22	5268.76	15531.1	8599.86	6749.72
ENSG00000171914	TLN2	1615.72	1.38878	0.414654	3.3129	0.000923355	0.0107261	993.257	740.761	648.073	1038.53	3781.32	2492.36
ENSG00000150967	ABCB9	386.72	1.3891	0.351541	3.96221	7.42583e-05	0.00127299	191.096	297.613	136.296	461.88	773.623	459.815
ENSG00000189171	S100A13	1689.24	1.38923	0.457072	3.06463	0.00217941	0.0214047	383.304	1205.99	979.458	4042.85	1929.77	1594.09
ENSG00000167996	FTH1	43193.3	1.3928	0.327672	4.26648	1.98581e-05	0.000399357	28193.4	14554.4	27183	45628.9	62264.9	81335.3
ENSG00000198736	MSRB1	529.685	1.39397	0.347337	4.02712	5.64654e-05	0.000997009	183.319	434.972	240.522	715.914	1068.29	535.094
ENSG00000118965	WDR35	496.761	1.39505	0.381062	3.63229	0.000280913	0.00399684	148.877	327.047	267.246	481.475	1328.66	427.262
ENSG00000147202	DIAPH2	411.497	1.39553	0.426835	3.33236	0.000861142	0.0101098	121.102	369.563	183.064	739.008	568.966	487.282
ENSG00000136068	FLNB	4945.78	1.3989	0.281345	4.96975	6.70405e-07	1.90311e-05	2599.8	3120.85	2208.79	5604.14	9024.17	7116.96
ENSG00000160307	S100B	1577.45	1.39998	0.451006	3.50216	0.000461496	0.00610842	188.874	2579.58	485.052	1528.4	2698.04	1984.73
ENSG00000163577	EIF5A2	269.596	1.40048	0.398587	3.49101	0.000481197	0.00632059	141.1	121.007	148.322	591.346	288.233	327.567
ENSG00000223687	ZNF311	24.3722	1.40054	0.807814	3.21738	0.00129365	0.014122	0	0	22.716	76.98	15.001	31.536
ENSG00000167995	BEST1	440.5	1.40261	0.488834	3.05788	0.0022291	0.0217455	186.652	82.5793	465.009	994.442	498.247	416.071
ENSG00000150540	HNMT	172.621	1.40316	0.503213	2.81689	0.00484907	0.0400094	82.2159	124.278	53.4493	272.229	160.725	342.827
ENSG00000106617	PRKAG2	414.641	1.4042	0.461252	2.96724	0.00300489	0.0275336	202.207	234.656	145.649	228.141	697.546	979.65
ENSG00000106804	C5	345.58	1.40445	0.380694	3.68263	0.000230837	0.00337687	131.101	143.901	265.91	286.226	606.469	639.875
ENSG00000171174	RBKS	129.718	1.40571	0.527534	2.75374	0.00589183	0.0467061	23.3315	119.372	60.1305	186.851	281.804	106.815
ENSG00000137269	LRRC1	1052.06	1.40613	0.395145	3.58181	0.000341224	0.0047292	351.084	551.892	754.971	1853.12	1803.33	997.961
ENSG00000173566	NUDT18	226.585	1.40613	0.389328	3.61352	0.00030207	0.00427034	101.103	149.624	105.562	291.824	408.241	303.152
ENSG00000102763	VWA8	518.554	1.40642	0.417461	3.3696	0.000752772	0.00906665	472.186	98.1141	216.47	1505.31	529.321	289.928
ENSG00000156042	TTC18	172.557	1.40779	0.538236	2.96924	0.00298539	0.0274288	36.6638	247.738	33.4058	251.235	268.946	197.354
ENSG00000156398	SFXN2	176.488	1.40977	0.426851	3.27352	0.00106217	0.0120145	74.4387	117.737	70.8203	195.249	431.814	168.87
ENSG00000141540	TTYH2	289.978	1.4101	0.447526	3.03988	0.00236671	0.0228231	154.433	130.001	101.554	905.565	195.013	253.305
ENSG00000188549	C15orf52	220.943	1.41015	0.395289	3.57045	0.000356368	0.00489679	203.318	91.5731	50.7768	567.553	270.018	142.421
ENSG00000137834	SMAD6	968.983	1.41093	0.320499	4.41565	1.00707e-05	0.000216588	596.621	607.49	360.783	1330.35	1529.03	1389.62
ENSG00000101247	NDUFAF5	224.713	1.41851	0.415281	3.42794	0.000608184	0.00765481	81.1048	138.177	130.951	331.014	275.375	391.656
ENSG00000124159	MATN4	16279.9	1.41993	0.451859	3.39258	0.000692379	0.00849572	1799.86	14518.4	11970	21620.9	30067.4	17702.9
ENSG00000187091	PLCD1	2174.86	1.42439	0.466363	3.16066	0.00157412	0.0164755	419.968	2019.51	1004.85	4827.35	2479.45	2298.06
ENSG00000132329	RAMP1	374.711	1.42464	0.433729	3.21893	0.0012867	0.0140676	183.319	210.128	125.606	1081.92	307.52	339.775
ENSG00000126106	TMEM53	139.284	1.42482	0.478142	3.00963	0.00261564	0.0248303	43.33	89.1203	81.5102	228.141	199.299	194.302
ENSG00000156535	CD109	9268.29	1.42486	0.32714	4.30817	1.64613e-05	0.00033602	3223.08	4463.37	6015.72	5806.39	20642.4	15458.7
ENSG00000189129	PLAC9	1538.23	1.42676	0.341552	4.15685	3.22666e-05	0.000613274	763.274	915.731	641.392	3566.27	1706.9	1635.8
ENSG00000011566	MAP4K3	1140.59	1.43014	0.314058	4.54253	5.55833e-06	0.000127459	558.846	596.861	606.65	1261.07	2275.87	1544.25
ENSG00000259885	SH2B2	180.892	1.43048	0.44152	3.21931	0.00128502	0.014058	63.3284	108.743	94.8725	212.745	429.671	175.991
ENSG00000260533	NRBP2	1901.98	1.43123	0.386675	3.69806	0.000217257	0.00320477	1308.79	811.076	746.954	1834.22	2347.66	4363.15
ENSG00000137038	TMEM261	771.299	1.43202	0.423176	3.3158	0.000913827	0.0106645	329.975	270.631	459.664	2251.32	680.402	635.806
ENSG00000095637	SORBS1	2346.76	1.43286	0.357063	3.91542	9.02483e-05	0.00150901	619.952	1130.76	1540.68	990.943	5723.95	4074.24
ENSG00000137936	BCAR3	446.054	1.4329	0.489967	2.7934	0.00521564	0.0422636	128.879	161.888	292.635	1300.96	211.085	580.872
ENSG00000127955	GNAI1	601.314	1.43321	0.346442	4.10432	4.05498e-05	0.000742727	394.414	242.015	257.893	1475.92	736.12	501.524
ENSG00000091947	TMEM101	791.627	1.43693	0.314668	4.56274	5.049e-06	0.000117303	368.86	431.702	434.276	1091.72	985.78	1437.43
ENSG00000154237	LRRK1	663.391	1.44018	0.475535	3.03392	0.00241396	0.0232027	477.741	197.863	275.264	470.278	1662.97	896.232
ENSG00000128311	TST	278.482	1.44365	0.411841	3.50391	0.000458483	0.00608222	108.88	156.165	156.339	545.858	355.738	347.913
ENSG00000240764	PCDHGC5	106.407	1.44487	0.520685	2.79021	0.00526745	0.0426053	91.1041	16.3523	45.4319	324.716	82.5055	78.3313
ENSG00000213853	EMP2	4900.89	1.44624	0.311392	4.66491	3.08749e-06	7.48843e-05	2555.36	3638.4	1662.27	5878.47	8294.48	7376.37
ENSG00000182568	SATB1	1371.6	1.44827	0.285722	5.06621	4.05812e-07	1.22277e-05	586.621	820.888	737.6	1556.4	2375.52	2152.58
ENSG00000153551	CMTM7	182.141	1.44864	0.470594	2.9691	0.00298675	0.0274288	92.2151	93.2084	56.1218	527.663	223.943	99.6944
ENSG00000131089	ARHGEF9	1101.75	1.44923	0.297219	4.87311	1.09854e-06	2.97498e-05	581.066	537.992	598.632	1916.1	1429.38	1547.3
ENSG00000228960	OR2A9P	166.28	1.45147	0.533996	2.75065	0.00594767	0.0469669	34.4418	93.2084	110.907	324.716	121.079	313.325
ENSG00000068383	INPP5A	964.347	1.45245	0.328045	4.45657	8.32809e-06	0.000183125	589.954	286.984	674.797	1502.51	1174.36	1557.47
ENSG00000116285	ERRFI1	15640.6	1.45467	0.312519	4.60819	4.06186e-06	9.61397e-05	8863.76	9261.97	4361.46	19333.2	42041.4	9981.64
ENSG00000137285	TUBB2B	6435.26	1.45482	0.265683	5.47772	4.30834e-08	1.61856e-06	1853.19	4144.5	4128.96	5362.01	12464.8	10658.1
ENSG00000144366	GULP1	568.177	1.45514	0.378756	3.88959	0.000100412	0.00165346	156.655	260.002	494.406	568.952	1111.15	817.901
ENSG00000135821	GLUL	14790.4	1.45671	0.45936	2.9885	0.00280346	0.0261909	5241.82	4327.65	8666.8	5811.29	46236.3	18458.7
ENSG00000165238	WNK2	275.25	1.45678	0.37179	3.91754	8.9458e-05	0.00149863	149.988	137.36	134.959	405.895	408.241	415.054
ENSG00000171119	NRTN	82.7192	1.45739	0.52861	2.73164	0.00630198	0.049171	37.7749	35.9752	42.7594	93.7756	103.935	182.095
ENSG00000163590	PPM1L	227.124	1.45739	0.410317	3.56406	0.000365165	0.00499435	155.544	58.8684	132.287	321.217	201.442	493.385
ENSG00000144824	PHLDB2	277.975	1.4574	0.431964	3.42791	0.00060824	0.00765481	299.977	102.202	41.4232	543.759	561.466	119.023
ENSG00000135932	CAB39	3739.86	1.46162	0.269478	5.41788	6.03108e-08	2.19959e-06	1436.56	2712.04	1631.54	3801.41	8246.26	4611.37
ENSG00000072133	RPS6KA6	164.33	1.46552	0.498084	2.91206	0.00359049	0.031564	77.7718	51.5099	101.554	118.269	342.88	293.997
ENSG00000183044	ABAT	507.269	1.4687	0.411314	3.48039	0.000500681	0.00652597	191.096	234.656	261.902	281.327	1294.37	780.261
ENSG00000137273	FOXF2	169.579	1.46932	0.500669	2.92128	0.00348594	0.0308192	55.5513	74.4032	108.235	411.493	191.798	175.991
ENSG00000065361	ERBB3	218.121	1.4699	0.427712	3.40239	0.000668003	0.00825371	115.547	105.473	90.8638	513.667	200.37	282.806
ENSG00000103932	RPAP1	612.765	1.47095	0.390733	3.74066	0.000183541	0.00277636	261.091	337.676	289.962	1366.75	542.179	878.938
ENSG00000157514	TSC22D3	55544	1.47252	0.2956	5.01031	5.4342e-07	1.57815e-05	18356.4	15647.6	56662.9	76712.7	41469.2	124416
ENSG00000160285	LSS	5861.15	1.47309	0.278585	5.28477	1.25863e-07	4.24116e-06	2939.77	2969.59	3124.11	8283.05	10435.3	7415.02
ENSG00000145194	ECE2	162.864	1.47318	0.431149	3.41917	0.000628118	0.00787132	68.8836	97.2965	77.5015	254.034	267.875	211.596
ENSG00000185008	ROBO2	81.4299	1.47689	0.657007	2.98772	0.00281065	0.0262164	128.879	8.17617	0	277.128	42.86	31.536
ENSG00000132423	COQ3	108.09	1.47767	0.523059	2.79794	0.00514291	0.0417773	39.9969	55.598	53.4493	254.034	126.437	119.023
ENSG00000100596	SPTLC2	2022.46	1.47768	0.334017	4.38895	1.13901e-05	0.000242393	1031.03	986.046	889.931	5034.49	2131.21	2062.05
ENSG00000197903	HIST1H2BK	481.639	1.47787	0.358085	4.12705	3.67451e-05	0.000684398	196.651	223.21	310.006	554.956	939.705	665.307
ENSG00000039139	DNAH5	86.6169	1.48158	0.638675	2.83431	0.00459251	0.0383404	1.11103	124.278	12.0261	9.09764	177.869	195.32
ENSG00000134308	YWHAQ	14825.5	1.48202	0.291394	5.06686	4.04425e-07	1.22067e-05	6251.74	8080.51	7696.7	14305	32647.5	19971.4
ENSG00000141401	IMPA2	353.523	1.48271	0.371079	3.99662	6.42546e-05	0.00111778	157.766	166.794	209.788	622.138	507.891	456.763
ENSG00000205352	PRR13	1916.28	1.48662	0.323958	4.59887	4.24791e-06	0.000100141	687.725	1024.47	1230.67	2613.12	3653.81	2287.88
ENSG00000171302	CANT1	2136.32	1.48687	0.292561	5.07027	3.97261e-07	1.20316e-05	1043.25	1210.89	952.734	2610.32	4518.51	2482.19
ENSG00000130021	HDHD1	310.518	1.48776	0.403827	3.67977	0.000233448	0.0034038	159.988	121.825	176.383	370.204	625.756	408.95
ENSG00000085871	MGST2	126.194	1.48805	0.46096	3.22865	0.00124377	0.0136405	82.2159	62.1389	40.087	265.931	172.511	134.282
ENSG00000111321	LTBR	3012.19	1.48833	0.299824	4.97948	6.37538e-07	1.82744e-05	1567.66	2050.58	1093.04	4839.24	4358.86	4163.77
ENSG00000154153	FAM134B	159.095	1.48949	0.450689	3.33178	0.000862919	0.010124	68.8836	113.649	56.1218	262.432	236.801	216.683
ENSG00000106868	SUSD1	247.683	1.49032	0.39477	3.75031	0.000176615	0.00268143	169.987	102.202	88.1913	564.054	364.31	197.354
ENSG00000187231	SESTD1	2088.24	1.49034	0.316284	4.70417	2.54895e-06	6.30348e-05	814.382	786.548	1555.37	3571.17	1716.54	4085.43
ENSG00000204959	ARHGEF34P	297.107	1.49234	0.466646	3.15521	0.0016038	0.0166971	113.325	223.21	77.5015	160.258	639.685	568.665
ENSG00000119711	ALDH6A1	2529.85	1.49296	0.341425	4.332	1.47762e-05	0.000306474	1092.14	1065.36	1452.48	1780.34	4271	5517.78
ENSG00000065675	PRKCQ	111.175	1.49303	0.526814	2.74083	0.00612844	0.0482004	39.9969	35.9752	69.4841	58.0849	173.583	289.928
ENSG00000160606	TLCD1	122.885	1.49408	0.473673	3.13807	0.00170065	0.0174849	52.2182	71.1327	52.1131	207.146	234.658	120.04
ENSG00000023697	DERA	751.651	1.49423	0.313672	4.763	1.90732e-06	4.8667e-05	316.642	407.173	419.577	980.445	1357.59	1028.48
ENSG00000157150	TIMP4	3931.16	1.495	0.398947	4.00141	6.29671e-05	0.00109971	353.306	2706.31	3789.56	2699.9	8330.91	5706.99
ENSG00000127241	MASP1	47.6919	1.50011	0.694147	2.79838	0.00513593	0.0417773	68.8836	3.27047	2.67246	120.369	68.576	22.3804
ENSG00000183971	NPW	247.797	1.50042	0.490688	2.92916	0.00339875	0.0302478	135.545	113.649	44.0957	906.964	133.937	152.593
ENSG00000072952	MRVI1	89.4163	1.50201	0.535528	2.759	0.00579788	0.0460933	42.219	45.7866	30.7333	231.64	99.6495	86.4696
ENSG00000169299	PGM2	1139.55	1.50538	0.337042	4.45003	8.58584e-06	0.000188323	572.178	632.018	461	1058.13	2414.09	1699.89
ENSG00000109084	TMEM97	1199.81	1.50635	0.310763	4.84079	1.29325e-06	3.4421e-05	579.955	694.157	521.131	1282.07	2201.93	1919.63
ENSG00000241935	HOGA1	133.27	1.50646	0.50664	3.01052	0.00260798	0.0247709	79.9938	77.6736	33.4058	137.864	255.017	215.665
ENSG00000206290	COL11A2	63574.1	1.51101	0.280645	5.32075	1.03339e-07	3.54788e-06	8872.65	47435.7	32979.6	19734.2	171590	100833
ENSG00000170356	OR2A20P	111.475	1.51441	0.598323	2.80323	0.00505933	0.0413009	16.6654	110.378	37.4145	181.253	113.579	209.562
ENSG00000100505	TRIM9	143.646	1.51557	0.458309	3.35588	0.000791127	0.00945763	98.8813	89.1203	24.0522	329.614	216.443	103.764
ENSG00000130540	SULT4A1	75.6642	1.51809	0.537004	2.80967	0.00495922	0.0406711	44.441	37.6104	21.3797	156.759	130.723	63.0719
ENSG00000131016	AKAP12	1978.69	1.51961	0.313038	4.79394	1.63537e-06	4.24644e-05	689.947	1420.2	561.218	1800.63	6120.41	1279.75
ENSG00000184557	SOCS3	7508.89	1.51966	0.302647	5.05626	4.27557e-07	1.28391e-05	2716.46	2802.79	6409.91	10068.3	10175	12880.9
ENSG00000006740	ARHGAP44	420.418	1.5223	0.347566	4.37719	1.20221e-05	0.000255136	204.429	228.933	189.745	520.665	669.687	709.051
ENSG00000165795	NDRG2	8142.26	1.52385	0.289459	5.22831	1.71064e-07	5.58313e-06	2379.82	4511.61	4740.95	5182.85	14332.4	17705.9
ENSG00000131981	LGALS3	2203.26	1.52398	0.361615	4.2733	1.92601e-05	0.00038853	571.067	1864.17	1030.24	3498.39	3667.74	2587.98
ENSG00000114859	CLCN2	312.791	1.52601	0.416986	3.68176	0.000231629	0.00338087	135.545	222.392	102.89	366.705	450.03	599.184
ENSG00000180354	MTURN	1868.22	1.52602	0.32086	4.77321	1.81309e-06	4.65315e-05	634.395	1120.95	1090.37	2971.43	2765.54	2626.64
ENSG00000125868	DSTN	27021.2	1.52658	0.278906	5.48435	4.15001e-08	1.5624e-06	9455.94	16219.1	15692.7	36172.2	46643.5	37943.9
ENSG00000130203	APOE	1987.95	1.52714	0.375664	3.99762	6.39834e-05	0.00111526	1026.59	862.586	766.997	5184.95	1229.01	2857.57
ENSG00000260789	GPSM1	1833.57	1.52798	0.385399	4.05753	4.95937e-05	0.000883629	832.158	1648.32	446.302	2835.66	2492.31	2746.68
ENSG00000076604	TRAF4	1783.61	1.53024	0.286008	5.34584	8.99997e-08	3.1282e-06	834.38	963.153	861.87	2123.95	3192	2726.34
ENSG00000147155	EBP	871.879	1.53239	0.368153	4.20224	2.64282e-05	0.000516197	405.524	656.547	267.246	1579.49	1105.79	1216.68
ENSG00000158373	HIST1H2BD	103.35	1.53433	0.5026	3.09557	0.00196432	0.019681	31.1087	36.7928	82.8464	135.065	132.866	201.423
ENSG00000034510	TMSB10	10208.8	1.53471	0.312159	4.90917	9.14616e-07	2.52334e-05	5938.43	5584.33	3339.24	23786.1	10611.1	11993.8
ENSG00000060656	PTPRU	1712.33	1.53497	0.308568	4.97905	6.38968e-07	1.82857e-05	1035.48	792.271	736.264	2275.81	2509.45	2924.71
ENSG00000168913	ENHO	324.96	1.53652	0.372405	4.18889	2.80318e-05	0.000545708	45.552	272.267	183.064	189.651	740.406	518.818
ENSG00000111412	C12orf49	666.929	1.53678	0.348571	4.44429	8.81809e-06	0.000192223	184.43	474.218	364.791	883.87	1179.72	914.543
ENSG00000267272	LINC01140	88.3972	1.53913	0.522557	2.95774	0.00309904	0.0281335	31.1087	40.0632	52.1131	136.465	141.438	129.196
ENSG00000163689	C3orf67	111.634	1.54043	0.517615	3.13157	0.00173875	0.0177875	15.5544	114.466	41.4232	107.772	260.374	130.213
ENSG00000092445	TYRO3	847.825	1.54173	0.314705	4.89187	9.98812e-07	2.72581e-05	356.639	476.671	410.223	924.46	1334.02	1584.94
ENSG00000103876	FAH	659.259	1.54514	0.368111	4.13703	3.51826e-05	0.000659468	344.418	241.197	292.635	1825.13	520.749	731.431
ENSG00000163754	GYG1	1475.17	1.54528	0.323818	4.74934	2.04086e-06	5.16267e-05	696.613	610.76	784.368	1452.12	1889.05	3418.09
ENSG00000101439	CST3	15114.9	1.54655	0.320856	4.80388	1.5562e-06	4.05877e-05	5702.89	8432.9	7392.04	17221.1	16425	35515.6
ENSG00000049089	COL9A2	111203	1.54702	0.299044	5.21353	1.85279e-07	5.98323e-06	29131.1	86994.5	58257.1	130473	195002	167359
ENSG00000237424	FOXD2-AS1	101.861	1.5479	0.505854	3.04195	0.00235053	0.0227043	47.7741	47.4218	42.7594	136.465	121.079	215.665
ENSG00000120437	ACAT2	1761.27	1.54871	0.389516	4.07471	4.60719e-05	0.000829247	633.284	1727.63	435.612	3494.89	2444.09	1832.14
ENSG00000160752	FDPS	5274.17	1.54884	0.334442	4.63658	3.5422e-06	8.49791e-05	2408.7	3711.98	1594.13	12041.8	6844.74	5043.72
ENSG00000183628	DGCR6	444.415	1.55307	0.397143	3.8973	9.72722e-05	0.0016112	169.987	238.744	215.133	780.297	399.669	862.661
ENSG00000103260	METRN	590.17	1.5581	0.350809	4.41301	1.01946e-05	0.000218453	332.197	257.549	232.504	1411.53	543.25	763.984
ENSG00000164687	FABP5	888.332	1.55942	0.319782	4.85685	1.1927e-06	3.19567e-05	443.299	487.3	336.731	1720.15	1562.25	780.261
ENSG00000182685	BRICD5	474.014	1.5607	0.474513	2.8973	0.00376384	0.0326897	231.093	110.378	85.5189	2095.26	168.225	153.611
ENSG00000176049	JAKMIP2	85.6994	1.56308	0.556242	2.73791	0.00618308	0.0484575	42.219	44.1513	17.371	268.73	86.7915	54.9336
ENSG00000092068	SLC7A8	708.899	1.56338	0.437716	3.76819	0.000164433	0.00252688	921.04	165.159	117.588	1303.76	1310.44	435.4
ENSG00000164241	C5orf63	573.21	1.5657	0.378133	4.11579	3.85857e-05	0.000714714	249.981	289.437	251.212	1330.35	560.394	757.881
ENSG00000173714	WFIKKN2	87.2661	1.56908	0.585261	2.87712	0.0040132	0.034432	84.4379	13.0819	29.3971	150.461	141.438	104.781
ENSG00000114638	UPK1B	97.6761	1.56954	0.513496	3.04315	0.00234115	0.0226508	41.1079	50.6923	38.7507	209.246	122.151	124.109
ENSG00000137710	RDX	5255	1.56977	0.285441	5.50205	3.75405e-08	1.43165e-06	2307.6	2310.59	3132.13	6847.72	9173.11	7758.87
ENSG00000169738	DCXR	919.977	1.56991	0.307318	5.11234	3.18192e-07	9.92634e-06	392.192	425.161	538.502	1355.55	1442.24	1366.22
ENSG00000175318	GRAMD2	353.561	1.57012	0.493314	3.50583	0.000455179	0.00604748	31.1087	394.092	160.348	404.495	665.401	465.919
ENSG00000164114	MAP9	1303.3	1.57045	0.403337	4.0892	4.32867e-05	0.00078714	264.424	1616.43	374.145	1570.39	2282.29	1712.1
ENSG00000047249	ATP6V1H	927.032	1.5725	0.37565	4.17167	3.02382e-05	0.000579084	389.97	551.892	340.739	2238.72	988.994	1051.88
ENSG00000166265	CYYR1	203.174	1.57323	0.453045	3.58991	0.000330797	0.00459551	164.432	112.831	30.7333	410.093	290.376	210.579
ENSG00000105835	NAMPT	6082.35	1.57463	0.363776	4.28067	1.86335e-05	0.000376875	3524.17	2343.29	2251.55	8565.78	15414.6	4394.69
ENSG00000153933	DGKE	524.483	1.5749	0.414286	3.81208	0.0001378	0.00217331	264.424	152.077	322.032	531.162	1091.86	785.347
ENSG00000117289	TXNIP	4391.58	1.57925	0.35724	4.59742	4.2776e-06	0.000100706	879.932	932.084	6063.82	4449.44	4018.12	10006.1
ENSG00000172201	ID4	3243.94	1.58002	0.31852	5.01749	5.2352e-07	1.52707e-05	1104.36	895.291	3128.12	3600.56	4178.85	6556.43
ENSG00000167323	STIM1	1869.32	1.5822	0.325054	4.88736	1.02198e-06	2.78044e-05	931.039	591.955	1246.7	2316.4	2969.13	3160.72
ENSG00000187688	TRPV2	180.889	1.58423	0.459957	3.4125	0.000643695	0.00802664	99.9923	109.561	24.0522	547.258	227.158	77.314
ENSG00000168884	TNIP2	1812.82	1.58463	0.294613	5.36018	8.31369e-08	2.9126e-06	971.036	955.795	638.719	3530.58	3227.36	1553.4
ENSG00000164292	RHOBTB3	6122.42	1.58787	0.358511	4.4146	1.01197e-05	0.000217376	3387.52	2831.41	2212.8	5253.54	13925.2	9124.07
ENSG00000130821	SLC6A8	5011.25	1.58888	0.349928	4.53455	5.77266e-06	0.00013169	2450.92	1690.83	2896.95	4581.71	9903.87	8543.2
ENSG00000144426	NBEAL1	446.177	1.59089	0.413231	3.73857	0.000185073	0.00278588	215.539	208.492	136.296	898.567	1014.71	203.458
ENSG00000100100	PIK3IP1	354.413	1.59182	0.360042	4.43597	9.1659e-06	0.00019858	253.314	150.442	112.244	713.115	444.672	452.694
ENSG00000132639	SNAP25	126.355	1.59203	0.469623	3.39545	0.000685162	0.00842473	76.6607	57.2332	40.087	251.935	152.153	180.06
ENSG00000126562	WNK4	528.418	1.59448	0.394874	4.0416	5.3087e-05	0.000940177	118.88	416.167	205.78	344.311	822.912	1262.46
ENSG00000215018	COL28A1	143.401	1.59731	0.545866	2.91308	0.00357879	0.0315008	51.1072	25.3461	108.235	73.4809	261.446	340.792
ENSG00000187634	SAMD11	1376.13	1.59897	0.314742	5.08386	3.69833e-07	1.1337e-05	789.939	612.395	581.261	1757.24	2255.51	2260.42
ENSG00000125848	FLRT3	426.723	1.59993	0.456829	3.61179	0.000304086	0.00429539	47.7741	394.092	171.038	435.987	1241.87	269.582
ENSG00000226091	LINC00937	377.873	1.60008	0.417303	3.86355	0.000111749	0.0018119	188.874	241.197	101.554	808.99	399.669	526.956
ENSG00000138796	HADH	1996.39	1.6008	0.277325	5.76961	7.94548e-09	3.48123e-07	777.718	1156.93	946.053	2315.7	3773.82	3008.13
ENSG00000145681	HAPLN1	91425.3	1.60084	0.28406	5.69673	1.22129e-08	5.17131e-07	13457.8	91107.1	39573.9	56647.5	224542	123223
ENSG00000159267	HLCS	583.219	1.60159	0.462378	3.65725	0.000254936	0.00367462	148.877	153.712	614.667	902.066	973.993	705.999
ENSG00000034053	APBA2	196.929	1.6036	0.477943	3.46476	0.000530713	0.00686003	159.988	93.2084	36.0783	338.012	298.948	255.34
ENSG00000231312	AC007246.3	171.203	1.60732	0.466622	3.45423	0.00055187	0.00708469	54.4402	80.9441	97.545	338.012	251.802	204.475
ENSG00000257524	RP11-203J24.9	179.544	1.61285	0.477895	3.41609	0.000635274	0.00793809	123.324	81.7617	42.7594	305.821	195.013	328.585
ENSG00000177156	TALDO1	2729	1.61301	0.318036	5.07054	3.96685e-07	1.20316e-05	1114.36	1555.11	1187.91	5466.98	3555.24	3494.39
ENSG00000135047	CTSL	4424.86	1.61354	0.337635	4.75933	1.94241e-06	4.94195e-05	1723.2	2214.93	2112.58	8058.41	8658.79	3781.27
ENSG00000187186	RP11-195F19.5	120.754	1.61354	0.550756	2.8541	0.00431588	0.0366373	49.9961	20.4404	68.1479	414.292	75.005	96.6425
ENSG00000100399	CHADL	3007.34	1.61372	0.470419	3.70189	0.000214002	0.00316058	345.529	3069.34	1349.59	5016.3	4279.57	3983.71
ENSG00000129757	CDKN1C	6908.22	1.61372	0.280208	5.7731	7.7828e-09	3.42695e-07	2170.94	3821.54	4150.34	8815.61	10388.2	12102.7
ENSG00000077684	JADE1	1182.2	1.61438	0.316425	5.09679	3.45468e-07	1.06642e-05	595.51	493.023	578.589	1354.85	1850.48	2220.74
ENSG00000243244	STON1	594.36	1.61474	0.322798	5.00766	5.50956e-07	1.59479e-05	369.971	224.027	260.565	1020.34	754.336	936.924
ENSG00000131069	ACSS2	1392.39	1.61707	0.334861	4.85746	1.18899e-06	3.19056e-05	698.835	919.819	416.905	2026.67	2114.07	2178.02
ENSG00000170425	ADORA2B	81.5194	1.61944	0.533637	3.03417	0.002412	0.0231964	28.8867	49.057	28.0609	85.3778	154.296	143.438
ENSG00000151062	CACNA2D4	123.378	1.62085	0.497749	3.20939	0.00133016	0.0144154	71.1056	55.598	25.3884	377.902	114.65	95.6252
ENSG00000138744	NAAA	386.178	1.62686	0.389026	4.20252	2.63962e-05	0.000516197	194.429	116.102	235.177	487.773	658.972	624.616
ENSG00000125746	EML2	533.745	1.62778	0.349759	4.65491	3.24115e-06	7.82886e-05	211.095	300.066	235.177	736.209	697.546	1022.38
ENSG00000196730	DAPK1	611.664	1.63029	0.348178	4.6842	2.81049e-06	6.92118e-05	232.204	341.764	281.945	1142.1	895.774	776.192
ENSG00000138356	AOX1	274.138	1.63652	0.490344	3.52599	0.000421903	0.00566075	42.219	104.655	256.557	292.524	618.255	330.619
ENSG00000115255	REEP6	154.735	1.64773	0.47745	3.40681	0.000657276	0.00815567	64.4395	53.9627	76.1652	118.269	263.589	351.982
ENSG00000115041	KCNIP3	556.161	1.64889	0.337146	4.88165	1.05203e-06	2.85341e-05	332.197	169.247	263.238	920.961	507.891	1143.43
ENSG00000178882	FAM101A	2950.58	1.65061	0.324699	5.02103	5.13949e-07	1.50494e-05	857.712	1797.94	1012.86	2641.81	9179.54	2213.62
ENSG00000169764	UGP2	6201.28	1.6531	0.315233	5.23355	1.66284e-07	5.44727e-06	1932.07	3384.94	3088.03	7509.05	14933.5	6360.09
ENSG00000117266	CDK18	163.905	1.65368	0.583127	3.02969	0.00244802	0.0234534	97.7702	99.7493	14.6986	179.853	247.516	343.844
ENSG00000111666	CHPT1	1561.35	1.65372	0.292753	5.64935	1.61057e-08	6.69126e-07	669.948	807.806	713.548	2654.41	2263.01	2259.4
ENSG00000135744	AGT	936.621	1.65463	0.344381	4.82589	1.3938e-06	3.67319e-05	354.417	342.582	630.702	1669.77	1300.8	1321.46
ENSG00000000971	CFH	621.251	1.65698	0.396467	4.37533	1.2125e-05	0.000257013	724.388	212.58	50.7768	1764.24	581.824	393.691
ENSG00000158022	TRIM63	52.4354	1.65719	0.732473	2.96885	0.00298921	0.0274327	36.6638	0	18.7073	53.886	37.5025	167.853
ENSG00000100784	RPS6KA5	256.616	1.65941	0.394504	4.24261	2.20934e-05	0.00043881	126.657	173.335	61.4667	421.99	470.388	285.858
ENSG00000164050	PLXNB1	4281.98	1.66074	0.379305	4.37238	1.22901e-05	0.0002602	1869.86	2587.76	1232.01	3674.05	6870.46	9457.74
ENSG00000150907	FOXO1	1191.53	1.66284	0.325473	5.07397	3.89607e-07	1.18813e-05	406.635	588.684	573.244	897.167	2269.44	2414.03
ENSG00000162496	DHRS3	1495.57	1.665	0.302818	5.53599	3.0948e-08	1.20099e-06	283.311	698.245	1211.96	1132.31	2566.24	3081.37
ENSG00000173868	PHOSPHO1	629.685	1.66603	0.395322	4.17574	2.97016e-05	0.00057191	235.537	257.549	303.325	1645.97	643.971	691.757
ENSG00000103253	HAGHL	319.093	1.66828	0.36971	4.4869	7.22662e-06	0.000162135	177.764	97.2965	148.322	632.636	260.374	598.166
ENSG00000107611	CUBN	203.999	1.66999	0.430488	3.86504	0.000111069	0.00180253	85.5489	81.7617	98.8812	265.931	444.672	247.201
ENSG00000260549	MT1L	105.073	1.67018	0.574883	2.87039	0.00409965	0.0351055	48.8851	51.5099	16.0348	60.8842	350.38	102.746
ENSG00000052802	MSMO1	9897.76	1.67082	0.295311	5.69337	1.24554e-08	5.24879e-07	3185.31	8088.69	3304.5	12485.5	18825.2	13497.4
ENSG00000111670	GNPTAB	944.091	1.67109	0.323282	5.19119	2.0895e-07	6.67167e-06	495.517	575.603	265.91	1340.85	1727.26	1259.4
ENSG00000016391	CHDH	192.528	1.67287	0.470336	3.55451	0.000378687	0.00514741	58.8843	106.29	80.1739	284.126	182.155	443.538
ENSG00000164418	GRIK2	178.399	1.67317	0.528829	3.26329	0.00110126	0.012409	113.325	89.1203	29.3971	163.058	362.167	313.325
ENSG00000087258	GNAO1	130.846	1.67385	0.633538	3.10471	0.00190468	0.0191846	14.4433	26.1638	128.278	163.757	356.809	95.6252
ENSG00000188672	RHCE	140.516	1.67686	0.489563	3.39735	0.000680412	0.00838181	44.441	53.9627	77.5015	296.023	117.865	253.305
ENSG00000186847	KRT14	72.2699	1.67694	0.781419	2.76979	0.00560929	0.0448159	5.55513	31.8871	0	380.701	4.286	11.1902
ENSG00000043143	JADE2	1258.47	1.68151	0.314934	5.38595	7.20627e-08	2.5862e-06	213.317	591.955	1031.57	882.471	2319.8	2511.69
ENSG00000184588	PDE4B	1262.24	1.68331	0.421931	4.33877	1.43285e-05	0.000298699	578.844	1313.91	45.4319	1205.09	3918.47	511.697
ENSG00000115112	TFCP2L1	161.595	1.68464	0.503591	3.4055	0.000660423	0.00817311	39.9969	121.825	50.7768	349.209	237.873	169.887
ENSG00000136261	BZW2	1027.23	1.685	0.29707	5.67065	1.42253e-08	5.92398e-07	481.074	466.042	466.345	1497.61	1749.76	1502.54
ENSG00000124253	PCK1	27.1685	1.68696	0.771228	2.79222	0.0052347	0.0423987	2.22205	22.8933	0	78.3796	50.3605	9.15561
ENSG00000166816	LDHD	228.679	1.6958	0.535382	2.82412	0.00474105	0.0393017	46.6631	115.284	70.8203	41.2893	489.675	608.339
ENSG00000116761	CTH	736.794	1.69651	0.43481	3.81699	0.00013509	0.00213734	158.877	246.103	450.31	393.298	2317.65	854.523
ENSG00000197565	COL4A6	379.147	1.69901	0.505387	3.83365	0.000126257	0.00202114	551.069	52.3275	57.458	684.422	538.964	390.639
ENSG00000133195	SLC39A11	493.992	1.70074	0.381756	4.46843	7.87951e-06	0.000174565	293.311	188.87	180.391	585.048	867.915	848.419
ENSG00000154040	CABYR	156.748	1.70252	0.435649	3.88539	0.000102166	0.00167497	101.103	40.8809	58.7942	388.399	127.508	223.804
ENSG00000163040	CCDC74A	204.646	1.7035	0.426767	4.04677	5.19287e-05	0.000920588	43.33	152.894	85.5189	205.047	371.81	369.276
ENSG00000189058	APOD	3428.4	1.70565	0.459688	4.06875	4.72663e-05	0.000846432	747.72	4406.96	569.235	6012.14	4709.24	4125.11
ENSG00000254531	AP001816.1	95.7366	1.70812	0.52043	3.35545	0.000792349	0.00946584	16.6654	43.3337	65.4754	97.9746	181.083	169.887
ENSG00000152503	TRIM36	109.205	1.70857	0.607262	2.9184	0.00351838	0.031062	56.6623	58.0508	12.0261	81.1789	215.371	231.942
ENSG00000166924	NYAP1	315.851	1.70963	0.511592	3.40563	0.000660124	0.00817311	61.1064	194.593	134.959	596.245	216.443	691.757
ENSG00000112837	TBX18	212.091	1.71133	0.537748	3.25526	0.00113287	0.0126923	156.655	48.2394	53.4493	202.947	592.539	218.717
ENSG00000177820	AC004917.1	31.434	1.71435	0.78979	3.38234	0.000718705	0.00875788	29.9977	0	0	99.3742	24.6445	34.5878
ENSG00000104044	OCA2	332.294	1.71611	0.408776	4.26535	1.99588e-05	0.000400468	256.647	131.636	74.829	523.464	624.684	382.501
ENSG00000152076	CCDC74B	150.134	1.71636	0.452214	3.80681	0.000140773	0.00221007	59.9954	94.026	40.087	170.056	332.165	204.475
ENSG00000003249	DBNDD1	64.5846	1.71989	0.577472	3.02587	0.00247917	0.0237132	25.5536	45.7866	5.34493	89.5767	190.727	30.5187
ENSG00000021762	OSBPL5	1609.79	1.72091	0.312338	5.52802	3.23858e-08	1.25128e-06	1046.59	655.729	519.794	2748.89	2152.64	2535.09
ENSG00000148660	CAMK2G	1386.53	1.72128	0.307842	5.58265	2.36881e-08	9.48438e-07	604.398	590.32	642.728	1531.9	2387.3	2562.55
ENSG00000115380	EFEMP1	1108.84	1.72558	0.340322	5.11254	3.17858e-07	9.92634e-06	632.173	658.999	249.875	1534	2175.14	1402.84
ENSG00000186222	BLOC1S4	452.666	1.72729	0.366711	4.70774	2.50477e-06	6.21163e-05	169.987	183.146	239.186	607.442	934.348	581.89
ENSG00000099194	SCD	30548.8	1.73029	0.269067	6.4425	1.17522e-10	6.71548e-09	13436.7	19302.3	9424.45	44294.3	57929.6	38905.2
ENSG00000139219	COL2A1	951104	1.7338	0.323222	5.45206	4.97896e-08	1.84692e-06	135713	650594	593321	813017	2.11321e+06	1.40077e+06
ENSG00000164106	SCRG1	16003.9	1.73617	0.308147	5.636	1.74041e-08	7.17999e-07	6822.81	8426.36	6009.04	30050.2	18762	25953.1
ENSG00000116791	CRYZ	814.665	1.73708	0.353945	4.91341	8.95047e-07	2.47709e-05	275.534	363.84	432.939	1448.62	1424.02	943.027
ENSG00000101400	SNTA1	875.585	1.74139	0.348008	4.99692	5.82536e-07	1.68069e-05	371.082	429.249	331.386	1748.15	931.133	1442.52
ENSG00000153132	CLGN	187.931	1.74216	0.558579	3.22479	0.00126063	0.0138168	23.3315	100.567	101.554	450.683	236.801	214.648
ENSG00000244119	PDCL3P4	26.3737	1.7426	0.777082	2.78282	0.00538881	0.0434562	4.4441	17.9876	0	50.3869	39.6455	45.778
ENSG00000167191	GPRC5B	475.43	1.7439	0.375194	4.67014	3.00988e-06	7.34054e-05	159.988	294.342	177.719	836.283	657.901	726.345
ENSG00000147872	PLIN2	1793.6	1.74597	0.327775	5.36113	8.27023e-08	2.90313e-06	554.402	516.734	1424.42	3037.91	1774.4	3453.7
ENSG00000162722	TRIM58	74.4666	1.74848	0.568418	3.13958	0.00169189	0.0174292	47.7741	29.4342	13.3623	151.161	92.149	112.919
ENSG00000188921	PTPLAD2	471.059	1.74894	0.416114	4.15544	3.24658e-05	0.000614415	185.541	226.48	152.33	321.217	961.135	979.65
ENSG00000183696	UPP1	1045.9	1.7498	0.377892	4.58373	4.56746e-06	0.000106536	323.308	621.389	335.394	2135.85	2209.43	650.048
ENSG00000178055	PRSS42	80.3652	1.75145	0.568306	3.06527	0.00217473	0.0213804	37.7749	35.1575	17.371	213.445	68.576	109.867
ENSG00000153930	ANKFN1	76.4206	1.75181	0.58039	2.92516	0.0034428	0.0305322	25.5536	30.2518	25.3884	208.546	118.936	49.8472
ENSG00000177301	KCNA2	8.25985	1.75374	0.792942	2.78119	0.00541608	0.0435879	0	0	0	24.4936	12.858	12.2075
ENSG00000099869	IGF2-AS	171.949	1.75445	0.478859	3.60272	0.0003149	0.0044269	62.2174	77.6736	56.1218	483.574	203.585	148.524
ENSG00000136960	ENPP2	3289.54	1.75761	0.467538	4.02208	5.76864e-05	0.0010135	3310.86	568.244	927.345	3551.58	5867.53	5511.67
ENSG00000069712	KIAA1107	87.3369	1.75813	0.524071	3.40482	0.000662085	0.00818658	23.3315	22.0757	65.4754	108.472	110.364	194.302
ENSG00000066468	FGFR2	1618.54	1.75841	0.333618	5.2805	1.28834e-07	4.32941e-06	457.742	955.795	717.557	2585.13	3279.86	1715.15
ENSG00000229644	NAMPTL	255.279	1.75939	0.447034	3.94172	8.0901e-05	0.00137221	197.763	52.3275	73.4928	644.533	401.812	161.749
ENSG00000021355	SERPINB1	1209.17	1.76024	0.295493	5.94422	2.77775e-09	1.28059e-07	484.407	789.818	295.307	1916.8	2868.4	900.301
ENSG00000215218	UBE2QL1	184.829	1.76111	0.420886	4.15602	3.23839e-05	0.00061418	126.657	66.227	34.742	504.569	268.946	107.833
ENSG00000146678	IGFBP1	20.5875	1.76167	0.805322	3.13793	0.00170146	0.0174849	0	13.0819	0	52.4864	39.6455	18.3112
ENSG00000141524	TMC6	518.876	1.76177	0.337599	5.22722	1.72074e-07	5.60574e-06	219.983	305.789	159.012	672.525	1027.57	728.379
ENSG00000106236	NPTX2	341.2	1.76312	0.411918	4.2688	1.96527e-05	0.000395677	176.653	130.001	114.916	430.388	400.741	794.503
ENSG00000134363	FST	2022.46	1.76381	0.793552	2.79117	0.00525179	0.0425176	893.264	529.816	21.3797	3338.83	3328.08	4023.38
ENSG00000109854	HTATIP2	987.605	1.76394	0.313019	5.64756	1.62742e-08	6.74538e-07	292.2	532.269	493.07	1303.06	1485.1	1819.93
ENSG00000130584	ZBTB46	581.697	1.77018	0.440429	3.92647	8.62027e-05	0.0014496	191.096	186.417	251.212	1860.82	515.391	485.247
ENSG00000125812	GZF1	1365.6	1.77221	0.413989	4.33029	1.48915e-05	0.000307892	334.419	357.299	1089.03	1119.71	3321.65	1971.51
ENSG00000163686	ABHD6	191.651	1.77432	0.439256	4.00001	6.33395e-05	0.00110512	79.9938	64.5918	82.8464	485.674	188.584	248.219
ENSG00000013297	CLDN11	189.36	1.77705	0.551976	3.18859	0.00142967	0.0152899	76.6607	94.8436	32.0696	125.967	279.661	526.956
ENSG00000139597	N4BP2L1	433.852	1.77782	0.445164	3.93774	8.22525e-05	0.00139379	185.541	132.454	177.719	269.43	758.622	1079.34
ENSG00000180573	HIST1H2AC	166.412	1.77815	0.443914	4.0109	6.04888e-05	0.00105957	78.8828	45.7866	82.8464	208.546	231.444	350.965
ENSG00000130066	SAT1	18705.7	1.7785	0.323706	5.47358	4.41034e-08	1.65336e-06	9417.05	6567.1	7393.37	37068.7	35769.9	16018.2
ENSG00000185924	RTN4RL1	146.134	1.78515	0.471886	3.75451	0.000173682	0.00263916	55.5513	61.3213	54.7855	349.209	158.582	197.354
ENSG00000186350	RXRA	5482.73	1.78538	0.354899	4.97304	6.59123e-07	1.87409e-05	1935.41	2088.19	2434.62	3491.39	11275.4	11671.4
ENSG00000249915	PDCD6	2748.37	1.78661	0.273675	6.52621	6.74559e-11	3.98351e-09	1133.25	1282.84	1170.54	3740.53	4933.19	4229.89
ENSG00000164442	CITED2	2322.16	1.79554	0.415361	4.38802	1.14389e-05	0.000243053	714.389	520.005	1778.53	2310.8	5326.43	3282.79
ENSG00000171408	PDE7B	262.598	1.79717	0.807551	3.01351	0.00258248	0.0245683	0	80.1265	65.4754	153.26	563.609	713.12
ENSG00000157766	ACAN	144467	1.79751	0.325993	5.5588	2.71632e-08	1.07298e-06	31932	118971	46920.5	121318	268326	279335
ENSG00000140284	SLC27A2	43.9303	1.79788	0.637516	2.84815	0.00439748	0.0370804	16.6654	22.0757	8.01739	97.2747	70.719	48.8299
ENSG00000165730	STOX1	57.8865	1.79812	0.59506	3.10714	0.0018891	0.0190932	9.99923	9.81141	49.4406	46.8878	65.3615	165.818
ENSG00000226958	CTD-2328D6.1	7857.11	1.79852	0.30201	5.95489	2.60242e-09	1.20923e-07	3721.93	2804.43	3554.38	12458.2	14951.7	9652.04
ENSG00000213214	ARHGEF35	207.98	1.80189	0.445295	3.9552	7.64702e-05	0.00130457	53.3292	94.026	85.5189	110.571	443.601	460.832
ENSG00000119938	PPP1R3C	4015.08	1.8029	0.395196	4.70425	2.54799e-06	6.30348e-05	903.264	1031.02	3839	4592.91	7561.57	6162.74
ENSG00000198719	DLL1	95.0968	1.80534	0.630874	2.97452	0.00293449	0.0270712	64.4395	13.8995	20.0435	88.1771	291.448	92.5733
ENSG00000111058	ACSS3	149.119	1.80544	0.48168	3.82113	0.000132842	0.00210367	81.1048	81.7617	22.716	349.209	197.156	162.766
ENSG00000126218	F10	179.955	1.8069	0.465551	4.02159	5.78077e-05	0.00101462	152.21	68.6798	13.3623	533.262	199.299	112.919
ENSG00000151726	ACSL1	3145.28	1.80729	0.270569	6.67828	2.41759e-11	1.50307e-09	1229.91	1337.62	1499.25	4219.9	5069.27	5515.74
ENSG00000204136	GGTA1P	263.538	1.81566	0.469252	3.98654	6.70434e-05	0.001164	47.7741	192.14	101.554	426.189	356.809	456.763
ENSG00000110721	CHKA	942.904	1.8176	0.342448	5.34351	9.11617e-08	3.16236e-06	345.529	633.653	264.574	1625.68	1500.1	1287.89
ENSG00000132170	PPARG	102.108	1.81882	0.518673	3.38653	0.000707817	0.00864311	62.2174	15.5347	33.4058	266.631	37.5025	197.354
ENSG00000064225	ST3GAL6	121.369	1.81905	0.576893	2.9786	0.00289571	0.0268538	29.9977	43.3337	36.0783	441.585	84.6485	92.5733
ENSG00000167701	GPT	81.5071	1.83156	0.571553	3.15815	0.00158775	0.0165985	26.6646	35.9752	21.3797	235.139	80.3625	89.5215
ENSG00000167107	ACSF2	1477.19	1.83175	0.32485	5.60695	2.05928e-08	8.35877e-07	481.074	609.125	680.142	1188.99	3125.56	2778.22
ENSG00000073331	ALPK1	389.14	1.83667	0.48263	3.78549	0.000153403	0.00237903	96.6592	113.649	213.797	1152.6	407.17	350.965
ENSG00000159247	TUBBP5	20.0189	1.83886	0.806272	2.92115	0.00348739	0.0308192	1.11103	8.17617	0	57.3851	10.715	42.7262
ENSG00000182168	UNC5C	1600.2	1.84107	0.330466	5.53764	3.0657e-08	1.19232e-06	509.961	930.448	447.638	1191.09	4347.07	2174.96
ENSG00000163406	SLC15A2	102.382	1.8421	0.636946	3.1902	0.00142174	0.0152328	104.436	9.81141	0	436.687	25.716	37.6397
ENSG00000226416	MRPL23-AS1	73.1368	1.84476	0.559178	3.30882	0.000936899	0.0108558	17.7764	42.5161	21.3797	125.267	159.653	72.2276
ENSG00000163659	TIPARP	3084.76	1.84865	0.293789	6.27157	3.57417e-10	1.92406e-08	964.37	1662.22	1090.37	3704.84	7969.82	3116.97
ENSG00000144063	MALL	1374.8	1.85348	0.350523	5.40898	6.33857e-08	2.30288e-06	242.204	1413.66	338.067	1459.12	3242.36	1553.4
ENSG00000118690	ARMC2	80.3989	1.85936	0.544665	3.43307	0.000596793	0.00754301	21.1095	40.0632	29.3971	135.065	128.58	128.178
ENSG00000258655	ARHGAP5-AS1	120.956	1.8628	0.492884	3.81231	0.000137676	0.00217331	32.2197	68.6798	41.4232	191.75	181.083	210.579
ENSG00000183578	TNFAIP8L3	436.375	1.86403	0.416969	4.50276	6.70765e-06	0.000151454	107.769	155.347	268.583	918.861	519.677	648.013
ENSG00000109339	MAPK10	229.346	1.8645	0.506462	3.83875	0.000123662	0.001985	97.7702	160.253	25.3884	252.634	457.53	382.501
ENSG00000214226	C17orf67	170.406	1.86477	0.485773	3.95685	7.59453e-05	0.00129687	26.6646	135.724	53.4493	255.434	357.881	193.285
ENSG00000187479	C11orf96	8274.93	1.86536	0.35873	5.22357	1.75502e-07	5.70687e-06	3297.52	5677.53	1101.06	23412.4	11549.7	4611.37
ENSG00000141258	SGSM2	2779.69	1.86737	0.305889	6.10547	1.02498e-09	5.09807e-08	1233.24	1289.38	911.311	3339.53	5214.99	4689.7
ENSG00000171385	KCND3	76.0837	1.86845	0.609879	2.94345	0.0032458	0.0291808	23.3315	32.7047	14.6986	33.5913	225.015	127.161
ENSG00000145002	FAM86B2	15.8601	1.8686	0.811591	3.12534	0.00177597	0.0180974	0	0	6.68116	42.6889	20.3585	25.4322
ENSG00000145040	UCN2	66.1219	1.87148	0.635585	3.0415	0.00235403	0.0227256	14.4433	51.5099	1.33623	193.85	126.437	9.15561
ENSG00000095739	BAMBI	4287.77	1.87569	0.401271	4.64229	3.44572e-06	8.27769e-05	1234.35	1019.57	2612.33	2709.7	10559.6	7591.01
ENSG00000159307	SCUBE1	2277.22	1.87884	0.42237	4.51926	6.2056e-06	0.00014102	1176.58	387.551	1194.59	2048.37	4156.35	4699.88
ENSG00000171798	KNDC1	132.935	1.87891	0.607192	3.32376	0.000888124	0.0104058	89.993	42.5161	12.0261	129.466	215.371	308.239
ENSG00000188916	FAM196A	380.511	1.88074	0.517679	3.44931	0.000562014	0.00718052	98.8813	65.4094	203.107	99.3742	692.189	1124.1
ENSG00000166682	TMPRSS5	126.773	1.88178	0.609325	3.57683	0.00034779	0.00480511	9.99923	121.825	26.7246	202.247	161.796	238.046
ENSG00000076944	STXBP2	265.298	1.88205	0.454458	4.17096	3.03323e-05	0.000580257	151.099	100.567	58.7942	405.195	306.449	569.682
ENSG00000170745	KCNS3	277.461	1.88214	0.379307	4.9554	7.21807e-07	2.02945e-05	35.5528	159.435	133.623	134.365	590.396	611.391
ENSG00000146021	KLHL3	70.8879	1.88554	0.573664	3.25983	0.00111478	0.0125374	29.9977	28.6166	13.3623	205.047	76.0765	72.2276
ENSG00000141447	OSBPL1A	930.417	1.88647	0.338445	5.58152	2.38428e-08	9.52472e-07	416.634	441.513	276.6	1172.9	1612.61	1662.25
ENSG00000173349	SFT2D3	167.935	1.88812	0.492598	3.87929	0.000104763	0.00171596	81.1048	28.6166	82.8464	415.692	232.515	166.835
ENSG00000179348	GATA2	268.854	1.89348	0.379505	4.97482	6.53072e-07	1.85989e-05	128.879	91.5731	94.8725	607.442	334.308	356.051
ENSG00000130147	SH3BP4	2237.69	1.8946	0.312489	6.04877	1.45952e-09	7.00558e-08	797.716	1008.12	849.844	3998.76	4536.73	2234.99
ENSG00000154016	GRAP	25.9607	1.89517	0.806154	2.77942	0.00544555	0.0438051	1.11103	7.35856	0	128.767	4.286	14.2421
ENSG00000198915	RASGEF1A	61.1076	1.89531	0.617485	3.06321	0.00218974	0.0214562	13.3323	30.2518	16.0348	162.358	84.6485	60.0201
ENSG00000111452	GPR133	254.723	1.89841	0.510042	4.00246	6.26877e-05	0.00109592	156.655	144.718	14.6986	666.227	296.805	249.236
ENSG00000164683	HEY1	176.666	1.89861	0.432668	4.40274	1.06894e-05	0.000228502	46.6631	66.227	96.2087	272.229	237.873	340.792
ENSG00000085231	TAF9	139.135	1.9047	0.544278	3.15411	0.0016099	0.0167508	49.9961	57.2332	10.6899	518.565	180.012	18.3112
ENSG00000164530	PI16	202.167	1.90566	0.510023	3.49086	0.000481463	0.00632059	154.433	9.81141	1.33623	1016.84	21.43	9.15561
ENSG00000162009	SSTR5	388.097	1.90578	0.397689	4.86062	1.17017e-06	3.15445e-05	64.4395	256.732	161.684	383.5	610.755	851.471
ENSG00000154556	SORBS2	1041.7	1.90672	0.30748	6.172	6.74326e-10	3.4412e-08	217.761	471.765	519.794	690.021	1887.98	2462.86
ENSG00000162542	TMCO4	202.407	1.91335	0.459244	4.14056	3.46464e-05	0.000651493	67.7725	105.473	48.1044	153.96	480.032	359.103
ENSG00000109906	ZBTB16	926.46	1.92004	0.31661	6.10656	1.01801e-09	5.07768e-08	157.766	277.99	756.308	711.715	1324.37	2330.61
ENSG00000164105	SAP30	477.91	1.9238	0.348265	5.54574	2.92714e-08	1.14346e-06	118.88	180.693	284.618	654.33	668.616	960.321
ENSG00000002745	WNT16	63.9027	1.92385	0.594795	3.32308	0.000890308	0.0104176	7.77718	54.7804	6.68116	33.5913	217.514	63.0719
ENSG00000074211	PPP2R2C	103.687	1.92791	0.518103	3.65379	0.000258395	0.00371905	24.4426	33.5223	45.4319	111.271	91.0775	316.377
ENSG00000160360	GPSM1	5367.26	1.93047	0.358365	5.37357	7.7194e-08	2.72603e-06	2360.93	1722.72	1989.65	4698.58	10424.6	11007.1
ENSG00000159674	SPON2	986.302	1.9327	0.376972	5.20767	1.91231e-07	6.15038e-06	686.614	384.28	176.383	1861.52	1312.59	1496.43
ENSG00000155850	SLC26A2	6814.7	1.93311	0.315363	6.05256	1.42565e-09	6.87778e-08	951.038	3649.03	2460	3040.71	23228	7559.48
ENSG00000182183	FAM159A	61.6125	1.935	0.711385	2.77863	0.00545879	0.0438118	25.5536	5.72332	13.3623	16.0958	94.292	214.648
ENSG00000173559	NABP1	482.209	1.93563	0.430263	4.39699	1.09762e-05	0.000234066	143.322	188.87	148.322	739.008	1413.31	260.426
ENSG00000058866	DGKG	64.364	1.94206	0.681586	3.07798	0.00208409	0.0206735	24.4426	31.0695	2.67246	111.971	67.5045	148.524
ENSG00000141542	RAB40B	619.437	1.94862	0.368558	5.25274	1.49857e-07	4.9831e-06	176.653	229.75	269.919	564.054	1631.89	844.35
ENSG00000119986	AVPI1	922.839	1.94882	0.301827	6.46598	1.00643e-10	5.80737e-09	228.871	356.481	526.476	1048.33	1397.24	1979.65
ENSG00000130528	HRC	70.5801	1.94909	0.555783	3.4958	0.000472643	0.0062326	42.219	10.629	20.0435	211.345	57.861	81.3832
ENSG00000198948	MFAP3L	1024.27	1.94917	0.380471	5.11586	3.12317e-07	9.77764e-06	289.978	253.461	621.348	775.399	2170.86	2034.58
ENSG00000132702	HAPLN2	39.0082	1.94932	0.688101	3.02704	0.00246963	0.0236348	31.1087	0.817617	5.34493	149.061	18.2155	29.5014
ENSG00000149403	GRIK4	204.187	1.95014	0.549179	3.68186	0.000231534	0.00338087	137.767	43.3337	33.4058	190.351	609.683	210.579
ENSG00000021645	NRXN3	164.891	1.95367	0.437959	4.4436	8.84652e-06	0.000192368	18.8874	77.6736	82.8464	77.6798	297.877	434.383
ENSG00000259954	IL21R-AS1	39.8087	1.95421	0.734878	2.77673	0.00549092	0.0440296	17.7764	0	9.35363	180.553	12.858	18.3112
ENSG00000180318	ALX1	33.1955	1.95869	0.710517	3.066	0.00216945	0.0213404	3.33308	3.27047	25.3884	48.9873	43.9315	74.2621
ENSG00000259075	POC1B-GALNT4	23.3801	1.9634	0.763279	2.73235	0.00628837	0.0491082	5.55513	0	10.6899	74.8806	6.429	42.7262
ENSG00000112297	AIM1	304.487	1.9637	0.386096	5.13326	2.84764e-07	8.96271e-06	63.3284	237.109	69.4841	379.301	791.838	285.858
ENSG00000072210	ALDH3A2	968.65	1.96591	0.333906	5.90862	3.44993e-09	1.56999e-07	313.309	300.066	543.847	1603.28	1559.03	1492.36
ENSG00000183943	PRKX	948.384	1.96723	0.391251	4.9475	7.5173e-07	2.10353e-05	262.202	394.092	308.67	557.755	1664.04	2503.55
ENSG00000253958	CLDN23	65.3608	1.96748	0.601356	3.25562	0.00113144	0.0126843	14.4433	10.629	38.7507	40.5895	117.865	169.887
ENSG00000170006	TMEM154	422.048	1.97042	0.382868	5.15772	2.49972e-07	7.8958e-06	73.3277	183.964	219.142	360.406	1118.65	576.803
ENSG00000107796	ACTA2	1382.88	1.9753	0.450568	4.613	3.96903e-06	9.41952e-05	809.937	682.71	74.829	4753.87	1072.57	903.353
ENSG00000153446	C16orf89	28.7551	1.97697	0.710081	2.86463	0.00417495	0.0356465	6.66615	14.7171	2.67246	52.4864	67.5045	28.4841
ENSG00000104228	TRIM35	754.278	1.97829	0.401987	4.78031	1.75022e-06	4.5049e-05	167.765	206.04	331.386	327.515	977.208	2515.76
ENSG00000197409	HIST1H3D	23.9859	1.9878	0.742194	2.75365	0.00589348	0.0467061	13.3323	0.817617	4.0087	85.3778	13.9295	26.4495
ENSG00000180998	GPR137C	96.8099	1.99122	0.527223	3.7711	0.000162529	0.00249981	24.4426	30.2518	44.0957	118.269	233.587	130.213
ENSG00000100504	PYGL	3378.94	1.99133	0.323893	6.18864	6.06871e-10	3.1332e-08	823.27	2206.75	1072.99	5518.07	6284.35	4368.24
ENSG00000067141	NEO1	985.062	1.99279	0.405149	5.07767	3.82089e-07	1.16722e-05	715.5	419.438	110.907	2051.17	1366.16	1247.2
ENSG00000183876	ARSI	1381.57	1.99365	0.344185	5.75062	8.89177e-09	3.81167e-07	428.856	820.888	150.994	1087.52	5078.91	722.276
ENSG00000216588	IGSF23	9.98892	1.99627	0.803592	2.90853	0.00363135	0.0317577	0	0	0	41.9891	12.858	5.08645
ENSG00000133800	LYVE1	295.803	1.99826	0.378483	5.25217	1.50316e-07	4.98895e-06	75.5497	210.128	30.7333	326.815	1012.57	119.023
ENSG00000230930	COL11A2	19248	1.99836	0.353447	5.80449	6.45624e-09	2.87873e-07	1876.52	12126.9	10775.4	16892.2	43463.2	30353.9
ENSG00000134668	SPOCD1	29.5046	1.99918	0.770381	2.84346	0.00446263	0.0374509	13.3323	1.63523	1.33623	24.4936	118.936	17.2939
ENSG00000140600	SH3GL3	31.0278	1.99977	0.708988	2.84754	0.00440589	0.0371072	8.8882	12.2643	2.67246	95.1753	40.717	26.4495
ENSG00000146352	CLVS2	9.68544	2.00049	0.803408	3.06748	0.00215875	0.0212826	0	0	0	21.6944	16.0725	20.3458
ENSG00000130558	OLFM1	214.21	2.00078	0.426501	4.77635	1.78509e-06	4.58797e-05	177.764	54.7804	20.0435	671.826	215.371	145.472
ENSG00000066185	ZMYND12	70.5365	2.00323	0.624805	3.43621	0.000589914	0.00746881	7.77718	13.8995	52.1131	141.363	91.0775	116.988
ENSG00000205364	MT1M	120.067	2.00588	0.472405	4.24656	2.17077e-05	0.000432611	37.7749	64.5918	25.3884	162.358	301.091	129.196
ENSG00000073150	PANX2	466.689	2.00673	0.368222	5.44623	5.14491e-08	1.89653e-06	101.103	230.568	181.728	442.285	685.76	1158.69
ENSG00000198538	ZNF28	517.395	2.00835	0.585238	2.99699	0.00272659	0.0256589	58.8843	125.913	129.615	2336.69	232.515	220.752
ENSG00000234078	DDR1	624.682	2.00863	0.33384	6.03866	1.55399e-09	7.41588e-08	269.979	352.393	96.2087	897.867	1616.89	514.748
ENSG00000141338	ABCA8	57.9339	2.01381	0.59851	3.3782	0.000729624	0.00886037	38.8859	8.17617	9.35363	186.152	65.3615	39.6743
ENSG00000198417	MT1F	130.028	2.01416	0.552749	3.98408	6.77417e-05	0.00117266	29.9977	122.643	6.68116	155.36	333.236	132.248
ENSG00000227619	RP11-492E3.2	174.474	2.01604	0.507446	3.86666	0.000110337	0.00179271	21.1095	137.36	17.371	224.642	610.755	35.6051
ENSG00000170323	FABP4	57.5541	2.01681	0.65203	3.20642	0.00134396	0.0145407	27.7756	18.8052	1.33623	219.743	47.146	30.5187
ENSG00000106537	TSPAN13	1443.03	2.01813	0.306516	6.59288	4.3139e-11	2.59968e-09	337.752	652.459	662.771	1731.35	2075.5	3198.36
ENSG00000165309	ARMC3	17.5859	2.02009	0.805183	2.81269	0.00491286	0.0403659	1.11103	4.9057	0	71.3815	12.858	15.2593
ENSG00000116704	SLC35D1	2955.76	2.02114	0.353413	5.64693	1.63342e-08	6.75441e-07	834.38	1213.34	873.896	1956.69	8862.37	3993.88
ENSG00000143499	SMYD2	473.748	2.02141	0.343303	5.90411	3.54556e-09	1.60936e-07	146.655	264.09	133.623	668.326	926.847	702.947
ENSG00000205918	PDPK2	139.893	2.02646	0.462063	4.35396	1.33703e-05	0.000281047	47.7741	55.598	40.087	256.133	307.52	132.248
ENSG00000162757	C1orf74	52.0834	2.02741	0.603491	3.35487	0.000794027	0.00946885	16.6654	18.8052	13.3623	94.4755	86.7915	82.4004
ENSG00000152939	MARVELD2	11.0367	2.02849	0.804843	2.73301	0.0062758	0.0490318	0	0	0	56.6853	7.5005	2.03458
ENSG00000056998	GYG2	2118.8	2.03217	0.279471	7.26856	3.63342e-13	2.91615e-11	603.287	995.04	800.403	2396.88	4094.2	3822.97
ENSG00000166091	CMTM5	83.762	2.03882	0.543918	3.75621	0.000172504	0.00262351	16.6654	43.3337	22.716	78.3796	154.296	187.181
ENSG00000008323	PLEKHG6	39.001	2.04586	0.730042	2.98085	0.00287453	0.0266994	15.5544	10.629	1.33623	37.0904	70.719	98.6771
ENSG00000163017	ACTG2	422.627	2.04612	0.559864	3.67377	0.000239	0.00347327	97.7702	195.411	10.6899	1951.79	207.871	72.2276
ENSG00000144488	ESPNL	30.0239	2.04704	0.730929	2.80466	0.00503702	0.0411753	12.2213	4.9057	2.67246	34.9909	105.007	20.3458
ENSG00000181013	C17orf47	37.1564	2.04708	0.742164	3.149	0.0016383	0.0169762	17.7764	9.81141	0	55.9855	80.3625	59.0028
ENSG00000227295	ELL2P1	10.516	2.04909	0.811929	2.91027	0.0036112	0.0316285	0	0	1.33623	32.1916	21.43	8.13832
ENSG00000260879	RP11-483I13.5	22.7854	2.05578	0.736295	2.78276	0.00538988	0.0434562	7.77718	4.08809	4.0087	55.2856	28.9305	36.6224
ENSG00000163431	LMOD1	279.542	2.05688	0.407756	5.02409	5.05814e-07	1.48853e-05	132.212	82.5793	76.1652	585.048	253.945	547.302
ENSG00000041353	RAB27B	106.331	2.0585	0.587835	3.55462	0.000378522	0.00514741	47.7741	14.7171	33.4058	75.5804	172.511	293.997
ENSG00000050628	PTGER3	135.36	2.05864	0.567592	3.82689	0.000129771	0.00206058	43.33	80.9441	13.3623	312.119	145.724	216.683
ENSG00000166925	TSC22D4	3858.88	2.06305	0.292238	7.06801	1.5717e-12	1.13272e-10	696.613	1889.51	1725.08	3364.73	6179.34	9298.03
ENSG00000139132	FGD4	189.677	2.0635	0.485263	4.32851	1.50124e-05	0.000310028	38.8859	115.284	48.1044	401.696	281.804	252.288
ENSG00000151320	AKAP6	232.152	2.06442	0.511606	3.90936	9.25428e-05	0.00154154	58.8843	62.1389	73.4928	786.596	277.518	134.282
ENSG00000134602	MST4	17506.8	2.06483	0.271303	7.58017	3.45096e-14	3.09307e-12	2697.57	8941.46	7020.57	9638.6	44581.9	32160.6
ENSG00000183979	NPB	49.4492	2.06511	0.687498	2.92731	0.00341912	0.0303679	6.66615	18.8052	8.01739	182.653	43.9315	36.6224
ENSG00000156110	ADK	1643.06	2.06762	0.282974	7.30925	2.68646e-13	2.21658e-11	477.741	761.202	599.968	2177.83	3082.7	2758.89
ENSG00000162493	PDPN	11160	2.06927	0.427653	4.90802	9.19988e-07	2.5342e-05	6437.28	2418.51	2986.48	10444.8	27215	17457.7
ENSG00000198865	CCDC152	40.4524	2.06973	0.681533	3.18388	0.00145314	0.0155034	32.2197	2.45285	1.33623	163.058	18.2155	25.4322
ENSG00000134548	C12orf39	33.8019	2.07379	0.677022	3.02916	0.00245236	0.0234823	9.99923	4.9057	12.0261	55.2856	31.0735	89.5215
ENSG00000124107	SLPI	476.379	2.07469	0.455747	4.45691	8.31488e-06	0.000183062	119.991	112.831	187.073	1594.89	345.023	498.472
ENSG00000167332	OR51E2	26.4895	2.07521	0.748742	2.77909	0.00545114	0.0438055	15.5544	1.63523	0	121.768	12.858	7.12103
ENSG00000261380	FAM83H	112.515	2.07548	0.556171	3.78757	0.000152128	0.00236593	38.8859	53.9627	8.01739	391.198	118.936	64.0892
ENSG00000141052	MYOCD	50.2879	2.08512	0.6334	3.45728	0.000545661	0.00703265	39.9969	4.08809	5.34493	165.857	39.6455	46.7953
ENSG00000185920	PTCH1	1109.25	2.08517	0.298262	6.98756	2.79712e-12	1.95212e-10	392.192	479.941	336.731	1499.01	2323.01	1624.61
ENSG00000116455	WDR77	1201.83	2.08896	0.369401	5.60471	2.08606e-08	8.42873e-07	391.081	443.966	331.386	955.952	3440.59	1648.01
ENSG00000107438	PDLIM1	342.797	2.0899	0.450027	4.82539	1.39727e-06	3.67683e-05	183.319	179.058	26.7246	850.979	478.96	337.74
ENSG00000110042	DTX4	131.066	2.09037	0.459218	4.53801	5.67866e-06	0.000129713	61.1064	35.1575	36.0783	315.618	174.654	163.784
ENSG00000101017	CD40	140.895	2.09094	0.494925	4.10481	4.04649e-05	0.000742713	58.8843	31.8871	30.7333	483.574	84.6485	155.645
ENSG00000160678	S100A1	7008.24	2.09102	0.470801	4.79622	1.61685e-06	4.20665e-05	547.735	6406.85	1925.51	11917.9	12472.3	8779.21
ENSG00000140090	SLC24A4	243.531	2.09419	0.620487	3.22244	0.00127103	0.0139222	75.5497	70.3151	30.7333	41.9891	693.26	549.336
ENSG00000174059	CD34	109.991	2.09961	0.568945	3.45839	0.000543414	0.00700881	21.1095	34.3399	30.7333	33.5913	241.087	299.083
ENSG00000119283	TRIM67	38.5254	2.10077	0.739168	3.23109	0.00123318	0.013575	18.8874	8.99379	0	66.4827	69.6475	67.1411
ENSG00000134323	MYCN	53.8987	2.10425	0.70374	2.93855	0.00329755	0.0295708	17.7764	7.35856	9.35363	18.8951	169.297	100.712
ENSG00000176842	IRX5	277.121	2.10642	0.431142	4.88897	1.01368e-06	2.76211e-05	75.5497	83.397	121.597	613.741	450.03	318.412
ENSG00000092758	COL9A3	183496	2.10774	0.32896	6.4682	9.91771e-11	5.74154e-09	34217.4	109580	67422.3	255269	301881	332609
ENSG00000164330	EBF1	368.836	2.10872	0.371222	5.6899	1.2711e-08	5.34377e-07	128.879	175.788	86.8551	776.098	595.754	449.642
ENSG00000138741	TRPC3	18.0721	2.11006	0.798315	3.01997	0.00252797	0.0241148	0	6.54094	1.33623	26.5931	34.288	39.6743
ENSG00000243509	TNFRSF6B	103.85	2.11038	0.588632	3.27926	0.0010408	0.0118107	69.9946	12.2643	0	460.48	80.3625	0
ENSG00000133169	BEX1	184.394	2.11121	0.590765	2.95805	0.00309595	0.0281335	45.552	40.0632	6.68116	933.558	63.2185	17.2939
ENSG00000106123	EPHB6	224.331	2.11672	0.550995	4.09764	4.17382e-05	0.000762121	144.433	58.0508	4.0087	902.766	114.65	122.075
ENSG00000272414	FAM47E-STBD1	60.6462	2.11841	0.71008	2.95798	0.00309659	0.0281335	8.8882	20.4404	2.67246	279.927	21.43	30.5187
ENSG00000204282	TNRC6C-AS1	142.997	2.12026	0.510481	4.15484	3.25515e-05	0.000615377	27.7756	68.6798	38.7507	340.811	250.731	131.23
ENSG00000169710	FASN	29621.2	2.1275	0.337029	6.3378	2.33064e-10	1.27406e-08	11656.9	14115.3	5974.3	32854.4	64093.9	49032.3
ENSG00000142910	TINAGL1	287.21	2.12836	0.54005	4.15322	3.27835e-05	0.000619101	151.099	116.919	20.0435	499.67	334.308	601.218
ENSG00000135929	CYP27A1	958.152	2.12959	0.297137	7.16486	7.78634e-13	5.87536e-11	304.421	288.619	430.267	1366.05	1356.52	2003.04
ENSG00000170608	FOXA3	654.617	2.13043	0.388476	5.61531	1.96215e-08	7.98286e-07	65.5505	555.162	153.667	661.328	1902.98	589.011
ENSG00000229314	ORM1	110.858	2.13085	0.513924	4.07166	4.66783e-05	0.000837601	37.7749	31.8871	26.7246	342.211	114.65	111.902
ENSG00000130208	APOC1	80.9643	2.13124	0.593964	3.60766	0.000308976	0.00435749	14.4433	20.4404	34.742	210.645	121.079	84.435
ENSG00000189221	MAOA	209.707	2.13697	0.590942	3.72983	0.000191607	0.00287442	38.8859	101.385	32.0696	617.94	100.721	367.242
ENSG00000114948	ADAM23	265.452	2.13964	0.400816	5.2803	1.28973e-07	4.32941e-06	138.878	61.3213	46.7681	903.465	216.443	225.838
ENSG00000162998	FRZB	3395.78	2.14136	0.456851	4.93382	8.0637e-07	2.24575e-05	2577.58	1006.49	340.739	5324.22	4656.74	6468.94
ENSG00000142606	MMEL1	32.6406	2.14172	0.76335	2.7708	0.00559191	0.0446998	13.3323	4.08809	0	132.266	7.5005	38.657
ENSG00000164136	IL15	89.1152	2.14405	0.60199	3.50856	0.000450548	0.00599497	21.1095	8.99379	37.4145	335.213	54.6465	77.314
ENSG00000007350	TKTL1	13.6774	2.14677	0.811537	2.95872	0.00308917	0.0281162	3.33308	0	0	33.5913	7.5005	37.6397
ENSG00000107859	PITX3	60.7347	2.1558	0.662722	2.7514	0.00593403	0.0469221	16.6654	13.0819	5.34493	256.833	65.3615	7.12103
ENSG00000132549	VPS13B	2583.88	2.15799	0.345742	6.24701	4.18385e-10	2.23185e-08	936.594	1118.5	586.606	2650.21	5445.36	4766
ENSG00000187123	LYPD6	65.1191	2.15806	0.648475	3.46768	0.000524977	0.00679584	31.1087	13.8995	6.68116	58.0849	184.298	96.6425
ENSG00000166510	CCDC68	25.3959	2.15899	0.757576	3.09086	0.00199576	0.0198979	4.4441	0.817617	10.6899	44.7884	41.7885	49.8472
ENSG00000214694	ARHGEF33	63.8713	2.15945	0.645299	3.3207	0.000897926	0.0104928	17.7764	23.7109	5.34493	33.5913	214.3	88.5042
ENSG00000145569	FAM105A	260.907	2.16104	0.52327	4.25617	2.07961e-05	0.00041585	97.7702	120.19	26.7246	679.524	207.871	433.365
ENSG00000100314	CABP7	31.9802	2.17051	0.795452	3.6425	0.000270005	0.00386031	0	12.2643	0	121.768	37.5025	20.3458
ENSG00000154380	ENAH	8521.05	2.17096	0.377491	5.74048	9.44097e-09	4.0363e-07	3291.97	2155.24	2767.34	7042.97	17819	18049.8
ENSG00000102760	RGCC	5585.97	2.17279	0.343408	6.37836	1.78996e-10	9.97011e-09	2620.91	2388.26	1006.18	9971.71	8200.19	9328.54
ENSG00000230306	BANF1P2	14.6386	2.17582	0.801387	2.7691	0.00562119	0.0448501	4.4441	0.817617	0	59.4846	13.9295	9.15561
ENSG00000196550	FAM72A	233.862	2.17661	0.511701	4.10965	3.96265e-05	0.000728839	72.2166	56.4156	45.4319	167.257	880.773	181.078
ENSG00000124772	CPNE5	620.254	2.18168	0.480154	4.80433	1.55268e-06	4.05758e-05	486.629	119.372	84.1826	801.992	1436.88	792.469
ENSG00000154655	L3MBTL4	126.69	2.18634	0.480784	4.5339	5.79056e-06	0.000131928	91.1041	16.3523	10.6899	490.573	97.5065	53.9163
ENSG00000181577	C6orf223	230.22	2.1865	0.529972	4.31313	1.60958e-05	0.000329696	27.7756	196.228	16.0348	576.65	483.246	81.3832
ENSG00000166165	CKB	16811.8	2.18839	0.351186	6.20689	5.4043e-10	2.83156e-08	5368.47	4402.05	6144	45765.3	23306.2	15885
ENSG00000105357	MYH14	1749.11	2.18938	0.311878	7.07261	1.52048e-12	1.10029e-10	231.093	908.373	773.679	1586.49	3320.58	3674.45
ENSG00000186439	TRDN	39.3244	2.18972	0.719876	2.78192	0.00540386	0.0435093	22.2205	0.817617	0	202.247	9.6435	1.01729
ENSG00000259417	RP11-2E17.1	31.0074	2.19595	0.736468	3.24365	0.00118009	0.0131297	2.22205	3.27047	14.6986	46.8878	79.291	39.6743
ENSG00000167103	PIP5KL1	79.5546	2.2017	0.609754	3.626	0.000287848	0.00408892	48.8851	12.2643	5.34493	255.434	35.3595	120.04
ENSG00000163884	KLF15	1267.85	2.20729	0.295294	7.45255	9.15518e-14	7.84723e-12	148.877	385.098	704.194	666.927	1750.83	3951.15
ENSG00000255390	RP11-732A19.5	15.9714	2.20732	0.808351	2.9739	0.00294042	0.0270976	0	0	0	63.6835	32.145	0
ENSG00000248485	PCP4L1	13.2945	2.21172	0.809307	2.80596	0.00501663	0.0410532	0	1.63523	1.33623	39.8896	25.716	11.1902
ENSG00000253330	RP11-697N18.3	32.197	2.21422	0.692368	3.20519	0.00134975	0.0145943	11.1103	7.35856	4.0087	76.98	42.86	50.8645
ENSG00000154856	APCDD1	297.304	2.21711	0.427914	5.24537	1.55967e-07	5.15713e-06	135.545	121.007	44.0957	539.56	514.32	429.296
ENSG00000163975	MFI2	3532.97	2.21751	0.421188	5.31543	1.06407e-07	3.63411e-06	934.372	1739.07	680.142	9416.05	3155.57	5272.61
ENSG00000164867	NOS3	148.119	2.21852	0.581673	3.45228	0.000555864	0.00712256	37.7749	22.0757	26.7246	646.632	117.865	37.6397
ENSG00000134755	DSC2	541.221	2.22059	0.366211	6.03098	1.62968e-09	7.75615e-08	147.766	215.851	142.977	459.781	1330.8	950.148
ENSG00000119632	IFI27L2	573.381	2.22682	0.425753	5.29664	1.17953e-07	3.98221e-06	139.989	310.695	113.58	1373.04	712.547	790.434
ENSG00000244693	CTAGE8	137.215	2.2292	0.582811	4.17822	2.93803e-05	0.000568201	8.8882	117.737	14.6986	272.229	317.164	92.5733
ENSG00000182909	LENG9	263.662	2.23105	0.467293	4.91042	9.08795e-07	2.5112e-05	52.2182	44.9689	176.383	536.061	346.094	426.244
ENSG00000108179	PPIF	2199.3	2.23139	0.336359	6.6514	2.90313e-11	1.78138e-09	966.592	542.08	697.513	2895.15	3998.84	4095.61
ENSG00000177675	CD163L1	91.0613	2.23441	0.555617	4.17657	2.95942e-05	0.000570463	75.5497	8.99379	4.0087	347.11	56.7895	53.9163
ENSG00000183048	SLC25A10	460.127	2.23623	0.344682	6.4772	9.34405e-11	5.44514e-09	116.658	212.58	117.588	480.775	1126.15	707.016
ENSG00000205358	MT1H	18.9624	2.2376	0.811384	3.0739	0.00211278	0.0208994	0	0	2.67246	9.79746	92.149	9.15561
ENSG00000125675	GRIA3	284.543	2.23948	0.420667	5.25873	1.45057e-07	4.8326e-06	73.3277	97.2965	73.4928	239.338	864.7	359.103
ENSG00000226065	ZBTB45P2	17.7722	2.24251	0.806869	3.30201	0.000959953	0.0110711	0	4.9057	0	25.8933	31.0735	44.7607
ENSG00000110628	SLC22A18	307.5	2.24734	0.398954	5.63125	1.78904e-08	7.36341e-07	91.1041	120.19	78.8377	690.721	411.456	452.694
ENSG00000061918	GUCY1B3	88.9377	2.24932	0.635895	3.82807	0.000129152	0.00205483	48.8851	21.258	4.0087	128.767	142.509	188.199
ENSG00000154359	LONRF1	2165.36	2.25025	0.320931	7.02384	2.15851e-12	1.53064e-10	556.624	1073.53	535.829	2425.57	4139.2	4261.43
ENSG00000148600	CDHR1	408.366	2.25283	0.350787	6.43125	1.26555e-10	7.16212e-09	129.99	177.423	96.2087	695.619	763.979	586.976
ENSG00000108551	RASD1	2583.19	2.25674	0.426681	5.24225	1.5863e-07	5.23537e-06	458.853	1082.53	662.771	6947.1	4766.03	1581.89
ENSG00000100427	MLC1	473.39	2.25798	0.440355	5.29712	1.17646e-07	3.97945e-06	234.426	214.216	41.4232	719.413	1008.28	622.581
ENSG00000119698	PPP4R4	45.7977	2.25844	0.796979	3.12139	0.00179999	0.0182974	1.11103	0	8.01739	254.034	8.572	3.05187
ENSG00000175175	PPM1E	24.2116	2.26174	0.798738	3.29319	0.000990573	0.0113501	7.77718	0	0	38.49	6.429	92.5733
ENSG00000178104	PDE4DIP	8991.8	2.26232	0.275851	8.19583	2.4887e-16	2.83503e-14	2414.26	3223.86	3178.9	11674.4	19961	13498.4
ENSG00000138669	PRKG2	224.117	2.26593	0.445487	5.03523	4.77274e-07	1.41634e-05	49.9961	91.5731	52.1131	157.459	496.104	497.455
ENSG00000261147	RP11-697E2.6	16.0924	2.26722	0.784449	2.82066	0.00479244	0.0396719	3.33308	1.63523	1.33623	53.886	15.001	21.3631
ENSG00000092607	TBX15	277.648	2.26834	0.393051	5.76353	8.23746e-09	3.60022e-07	71.1056	102.202	86.8551	508.768	557.18	339.775
ENSG00000249852	AC145676.2	84.9561	2.26887	0.573502	3.89496	9.8215e-05	0.00162529	9.99923	35.9752	18.7073	109.172	285.019	50.8645
ENSG00000112796	ENPP5	97.24	2.27226	0.524472	4.2558	2.08307e-05	0.000416072	14.4433	30.2518	33.4058	60.1844	273.232	171.922
ENSG00000235017	C2	40.9523	2.27333	0.667568	3.35412	0.000796168	0.00948579	23.3315	2.45285	2.67246	173.555	19.287	24.4149
ENSG00000257718	RP11-396F22.1	40.3262	2.27623	0.651072	3.46726	0.000525788	0.00680135	13.3323	8.99379	6.68116	93.0758	77.148	42.7262
ENSG00000178233	TMEM151B	23.4088	2.27898	0.761595	3.16494	0.00155113	0.0163061	8.8882	0.817617	2.67246	47.5876	22.5015	57.9855
ENSG00000143512	HHIPL2	328.594	2.28659	0.540985	4.74081	2.12868e-06	5.36179e-05	21.1095	308.242	42.7594	612.341	630.042	357.069
ENSG00000226015	CCT8P1	51.1377	2.28876	0.632656	3.57761	0.00034675	0.00479825	14.4433	12.2643	9.35363	73.4809	58.9325	138.351
ENSG00000233214	AC002511.2	12.9262	2.28924	0.812662	2.84666	0.00441805	0.0371828	0	0.817617	0	60.8842	11.7865	4.06916
ENSG00000147234	FRMPD3	97.8644	2.28956	0.600021	4.10046	4.12333e-05	0.000754463	44.441	35.9752	1.33623	312.819	127.508	65.1065
ENSG00000204086	RPA4	13.084	2.2939	0.811709	3.00358	0.0026682	0.0252478	2.22205	0	0	55.2856	12.858	8.13832
ENSG00000070808	CAMK2A	147.518	2.29447	0.463782	4.98091	6.32852e-07	1.81695e-05	36.6638	72.7679	26.7246	276.428	291.448	181.078
ENSG00000171227	TMEM37	25.4918	2.31113	0.760435	3.22921	0.00124132	0.0136221	12.2213	1.63523	0	95.1753	23.573	20.3458
ENSG00000114812	VIPR1	109.42	2.31199	0.737498	3.16235	0.00156503	0.0164135	25.5536	20.4404	1.33623	14.6962	208.942	385.553
ENSG00000113231	PDE8B	274.418	2.31295	0.486023	4.91988	8.65984e-07	2.4042e-05	172.209	42.5161	49.4406	393.998	372.882	615.46
ENSG00000231920	NEBL-AS1	16.7281	2.32091	0.811751	3.00716	0.00263701	0.0250062	0	1.63523	0	79.0795	6.429	13.2248
ENSG00000103056	SMPD3	517.333	2.32166	0.491667	4.8358	1.3261e-06	3.51576e-05	246.648	129.184	72.1566	420.591	1215.08	1020.34
ENSG00000253159	PCDHGA12	77.3818	2.32252	0.576254	3.83976	0.000123154	0.00197864	32.2197	12.2643	8.01739	297.423	88.9345	25.4322
ENSG00000129354	AP1M2	32.555	2.32561	0.69007	3.36311	0.000770708	0.00925111	8.8882	6.54094	5.34493	54.5858	58.9325	61.0374
ENSG00000124191	TOX2	64.2429	2.32593	0.717008	3.47785	0.000505449	0.00657679	16.6654	15.5347	0	282.727	26.7875	43.7434
ENSG00000159423	ALDH4A1	76.151	2.33211	0.723686	3.75762	0.00017154	0.00261335	16.6654	0	30.7333	123.168	170.368	115.971
ENSG00000165507	C10orf10	1970.08	2.33263	0.324454	7.23045	4.81402e-13	3.81171e-11	1044.36	406.356	509.105	3692.94	3114.85	3052.89
ENSG00000115290	GRB14	127.327	2.34112	0.51092	4.5878	4.47943e-06	0.000104759	22.2205	35.9752	46.7681	291.124	153.224	214.648
ENSG00000121104	FAM117A	276.501	2.34407	0.391852	5.99032	2.09432e-09	9.88755e-08	108.88	62.9565	81.5102	475.876	482.175	447.607
ENSG00000198648	STK39	6474.97	2.35217	0.288672	8.18356	2.75579e-16	3.07969e-14	983.257	3200.97	2227.5	6974.39	13390.5	12073.2
ENSG00000129353	SLC44A2	16768.3	2.35522	0.270194	8.7101	3.03619e-18	4.22126e-16	4649.64	5231.93	5676.32	21209.4	27904	35938.8
[truncated: 269 more rows]

## Sheet: supplemental file 2c
gene	symbol	baseMean	log2FoldChange	lfcSE	stat	pvalue	padj	RR2-12wT	RR22-12wT	RR2-12wB	RR4-12wB	RR22-12wB
ENSG00000171033	PKIA	538.399	-6.60413	0.465963	-12.9533	2.25152e-38	2.06476e-35	943.056	1718.69	3.3115	9.0488	17.8932
ENSG00000169436	COL22A1	2666.46	-6.28209	0.329675	-18.4038	1.22543e-75	2.24757e-71	7968.72	5108.73	86.0991	121.028	47.7151
ENSG00000116690	PRG4	42019.8	-6.2755	0.368388	-16.077	3.69735e-58	1.35626e-54	68937.6	138486	1365.17	442.26	868.416
ENSG00000000005	TNMD	23669.2	-6.17905	0.324991	-18.1046	2.93273e-73	2.68946e-69	32560.6	84178.1	559.644	281.644	765.828
ENSG00000204291	COL15A1	10916.1	-6.16995	0.381465	-15.3883	1.96243e-53	5.14186e-50	24552	29180.1	511.213	164.01	172.967
ENSG00000113578	FGF1	6582.3	-6.03666	0.35144	-16.3979	1.97863e-60	9.07253e-57	16036.2	16299	135.358	115.372	325.656
ENSG00000105664	COMP	118677	-5.9815	0.372347	-15.3704	2.58566e-53	5.92795e-50	213263	369793	5010.72	2706.72	2610.02
ENSG00000139330	KERA	652.323	-5.69397	0.506188	-10.0298	1.12762e-23	4.13635e-21	2415.4	794.872	14.4878	2.2622	34.5935
ENSG00000197859	ADAMTSL2	4401.15	-5.62947	0.374627	-14.386	6.33157e-47	1.2903e-43	10014.5	11467.7	279.408	137.994	106.166
ENSG00000100626	GALNT16	673.682	-5.56124	0.411268	-12.6844	7.22056e-37	5.29729e-34	1086.93	2206.71	24.8363	24.8842	25.0504
ENSG00000138615	CILP	2250.5	-5.44515	0.362775	-14.1215	2.7978e-45	4.66495e-42	4649.12	6334.49	141.153	41.8507	85.8873
ENSG00000105929	ATP6V0A4	340.87	-5.43937	0.571125	-9.25658	2.11082e-20	5.53066e-18	832.788	832.412	1.65575	12.4421	25.0504
ENSG00000196878	LAMB3	4266.31	-5.37066	0.382442	-13.7306	6.6575e-43	8.7218e-40	8972.69	11629.3	286.031	331.412	112.131
ENSG00000005059	CCDC109B	862.403	-5.27751	0.396851	-12.7545	2.94218e-37	2.45284e-34	1617.27	2551.1	44.7053	66.7349	32.2077
ENSG00000232258	TMEM114	79.3008	-5.25468	0.732858	-5.37963	7.46375e-08	3.13255e-06	27.3045	367.241	0.827876	1.1311	0
ENSG00000160161	CILP2	46706.3	-5.22697	0.392683	-12.7338	3.83569e-37	2.93127e-34	83572.8	142935	3645.14	1868.58	1510.18
ENSG00000143768	LEFTY2	4048.3	-5.14497	0.434378	-10.9785	4.84876e-28	2.40354e-25	5879.92	13809.9	334.462	84.8325	132.41
ENSG00000078098	FAP	2891.23	-5.07107	0.384084	-12.7351	3.77457e-37	2.93127e-34	6365.1	7553.73	260.781	178.714	97.816
ENSG00000163421	PROK2	156.576	-5.06823	0.619768	-7.47611	7.65573e-14	8.16359e-12	533.488	231.77	2.48363	6.7866	8.35015
ENSG00000130812	ANGPTL6	507.539	-4.97246	0.425135	-10.9038	1.10516e-27	5.19738e-25	1401.98	1049.49	46.775	20.3598	19.0861
ENSG00000179954	SSC5D	6840.55	-4.85552	0.408872	-11.4032	4.02959e-30	2.17373e-27	13743.6	19062.2	793.105	367.608	236.19
ENSG00000259436	CTC-378H22.2	50.0172	-4.78097	0.769423	-5.10831	3.25045e-07	1.18522e-05	100.817	146.896	1.24181	1.1311	0
ENSG00000095596	CYP26A1	85.104	-4.74413	0.659802	-6.54503	5.94843e-11	4.18008e-09	235.239	177.908	2.06969	7.9177	2.38576
ENSG00000131620	ANO1	1278.3	-4.73784	0.381999	-11.304	1.25342e-29	6.56828e-27	3484.48	2642.5	193.309	6.7866	64.4154
ENSG00000113296	THBS4	2201.44	-4.70504	0.386168	-11.9411	7.22201e-33	4.41529e-30	7079.22	3319.86	117.558	322.364	168.196
ENSG00000143603	KCNN3	138.847	-4.67466	0.587573	-7.24561	4.30492e-13	4.22227e-11	353.909	316.643	4.96725	6.7866	11.9288
ENSG00000134198	TSPAN2	1799.25	-4.64891	0.331634	-13.5988	4.06794e-42	4.38883e-39	3854.14	4658.24	120.87	190.025	172.967
ENSG00000138311	ZNF365	567.802	-4.50023	0.480715	-8.88131	6.60764e-19	1.37717e-16	826.487	1885.17	57.1234	46.3751	23.8576
ENSG00000157680	DGKI	1380.56	-4.43193	0.3811	-10.9197	9.28341e-28	4.48071e-25	3747.02	2792.66	237.186	53.1617	72.7656
ENSG00000119681	LTBP2	22000.8	-4.28596	0.414945	-9.65837	4.53009e-22	1.3401e-19	30071.7	74254.4	3054.86	1179.74	1443.38
ENSG00000240583	AQP1	5474.48	-4.25377	0.308895	-13.0976	3.39629e-39	3.46063e-36	13638.6	12174.4	765.371	248.842	545.145
ENSG00000196562	SULF2	7269.18	-4.17951	0.430957	-9.20123	3.53883e-20	8.8912e-18	9025.2	25261.3	986	614.188	459.258
ENSG00000172164	SNTB1	608.266	-4.14722	0.412788	-9.32739	1.08515e-20	2.88445e-18	1440.84	1420	95.2057	32.8019	52.4867
ENSG00000150551	LYPD1	683.897	-4.11872	0.480209	-7.75238	9.0188e-15	1.09546e-12	1661.38	1545.68	157.296	16.9665	38.1721
ENSG00000159261	CLDN14	50.1194	-4.0907	0.754184	-4.97249	6.60979e-07	2.22033e-05	184.831	58.7585	2.48363	4.5244	0
ENSG00000149380	P4HA3	1230.84	-4.08541	0.368724	-10.5123	7.57877e-26	3.02179e-23	3943.4	1816.62	148.604	111.979	133.602
ENSG00000262655	SPON1	507.721	-4.08409	0.414417	-8.95473	3.40581e-19	7.62289e-17	1795.8	587.585	118.8	10.1799	26.2433
ENSG00000101074	R3HDML	64.5775	-4.03683	0.730597	-4.95499	7.23326e-07	2.41649e-05	208.985	102.827	1.65575	2.2622	7.15727
ENSG00000215183	MSMP	30.2297	-4.02659	0.823569	-4.03037	5.56884e-05	0.00113235	92.4153	57.1263	0.413938	0	1.19288
ENSG00000100276	RASL10A	326.952	-4.01696	0.442663	-8.62876	6.20189e-18	1.12623e-15	635.355	881.378	32.2872	46.3751	39.365
ENSG00000154096	THY1	3214.41	-4.00631	0.400867	-9.66935	4.06954e-22	1.24399e-19	8755.3	6026.01	857.679	282.775	150.303
ENSG00000133048	CHI3L1	1741.4	-3.96159	0.372185	-10.1619	2.933e-24	1.12071e-21	6131.97	1966.78	222.699	213.778	171.775
ENSG00000161381	PLXDC1	546.149	-3.90458	0.407023	-9.06943	1.19641e-19	2.8873e-17	1718.08	806.297	120.87	50.8995	34.5935
ENSG00000188686	SCXA	776.287	-3.88054	0.50879	-7.63248	2.30288e-14	2.60723e-12	1483.9	2089.19	179.235	104.061	25.0504
ENSG00000182492	BGN	105244	-3.87294	0.411899	-8.9305	4.24075e-19	9.15055e-17	240461	241419	31455.5	6740.23	6144.52
ENSG00000160447	PKN3	1168.94	-3.76684	0.360875	-10.1419	3.60162e-24	1.34811e-21	2246.32	3037.49	181.305	235.269	144.338
ENSG00000262277	DIXDC1	1977.67	-3.71411	0.395441	-9.67506	3.84865e-22	1.19641e-19	3052.86	5487.39	86.9269	737.478	523.674
ENSG00000049323	LTBP1	16967	-3.70285	0.377087	-9.40075	5.41753e-21	1.46122e-18	28425.1	48962.2	3521.37	2150.22	1776.2
ENSG00000143196	DPT	3852.97	-3.67803	0.413092	-8.2372	1.76289e-16	2.78734e-14	9979.8	7385.62	1515.84	140.256	243.347
ENSG00000108821	COL1A1	759999	-3.65511	0.387783	-8.73997	2.33164e-18	4.64832e-16	1.74868e+06	1.69391e+06	259233	34634.3	63539.9
ENSG00000156427	FGF18	288.407	-3.65021	0.50687	-6.72615	1.74216e-11	1.37728e-09	814.935	502.712	88.5827	21.4909	14.3145
ENSG00000164708	PGAM2	307.566	-3.64149	0.464285	-6.91664	4.62479e-12	4.02006e-10	751.925	662.666	79.4761	6.7866	36.9792
ENSG00000082497	SERTAD4	602.788	-3.6287	0.395128	-8.68205	3.88699e-18	7.50435e-16	1133.14	1612.59	101.829	76.9148	89.4659
ENSG00000212664	RP11-592N21.1	29.3793	-3.61631	0.852	-2.9335	0.00335158	0.0339809	0	146.896	0	0	0
ENSG00000181135	ZNF707	22.2307	-3.61533	0.851843	-4.02621	5.6682e-05	0.00114747	55.6592	55.4942	0	0	0
ENSG00000165621	OXGR1	32.3918	-3.59081	0.814922	-3.9052	9.41481e-05	0.00177469	86.1143	71.816	2.89756	1.1311	0
ENSG00000145861	C1QTNF2	342.95	-3.56492	0.52512	-5.98024	2.2281e-09	1.23101e-07	533.488	1042.96	96.0336	12.4421	29.822
ENSG00000058085	LAMC2	6508.46	-3.5425	0.302597	-11.2672	1.90539e-29	9.70745e-27	10648.8	18737.4	894.106	803.081	1458.89
ENSG00000164929	BAALC	180.12	-3.5285	0.624006	-5.9423	2.81045e-09	1.51163e-07	153.325	670.826	17.3854	54.2928	4.77151
ENSG00000028277	POU2F2	380.789	-3.52321	0.494877	-6.03179	1.62153e-09	9.12287e-08	922.053	799.769	141.567	0	40.5579
ENSG00000123560	PLP1	83.3391	-3.51668	0.655023	-5.28374	1.26576e-07	5.04681e-06	187.981	195.862	11.1763	18.0976	3.57864
ENSG00000086991	NOX4	210.026	-3.51369	0.551477	-6.36369	1.96966e-10	1.26313e-08	269.895	675.723	5.79513	27.1464	71.5727
ENSG00000125726	CD70	136.495	-3.51346	0.578622	-5.49384	3.93283e-08	1.72979e-06	154.376	478.229	16.1436	15.8354	17.8932
ENSG00000102755	FLT1	564.711	-3.50452	0.410782	-7.89496	2.90408e-15	3.83381e-13	1049.12	1519.56	119.214	49.7684	85.8873
ENSG00000197467	COL13A1	861.368	-3.49448	0.380902	-8.42281	3.67558e-17	6.18475e-15	1771.64	2144.69	208.211	47.5062	134.795
ENSG00000105976	MET	1790.58	-3.483	0.346627	-9.78123	1.35558e-22	4.36186e-20	3049.71	4878.59	312.937	424.163	287.484
ENSG00000128512	DOCK4	591	-3.45909	0.454129	-6.64506	3.03098e-11	2.25981e-09	1650.87	1026.64	77.8203	13.5732	186.089
ENSG00000086570	FAT2	200.365	-3.4218	0.524202	-5.83819	5.27714e-09	2.70358e-07	612.251	295.425	70.7834	9.0488	14.3145
ENSG00000204262	COL5A2	55134.3	-3.41808	0.304838	-10.843	2.15245e-27	9.39957e-25	122453	122686	12895.8	8787.52	8848.77
ENSG00000197614	MFAP5	7303.82	-3.40372	0.80046	-3.56545	0.000363238	0.00542963	3109.57	32212.7	403.589	416.245	376.95
ENSG00000143355	LHX9	61.288	-3.39807	0.781344	-3.27744	0.00104755	0.0132687	279.346	16.3218	2.48363	1.1311	7.15727
ENSG00000148848	ADAM12	1910.58	-3.39111	0.363047	-9.17642	4.45654e-20	1.10456e-17	3301.75	5022.22	176.338	450.178	602.404
ENSG00000159871	LYPD5	85.4963	-3.37971	0.64534	-4.70038	2.59684e-06	7.54811e-05	143.874	251.356	13.6599	9.0488	9.54303
ENSG00000154175	ABI3BP	7816.29	-3.37374	0.336629	-9.68253	3.57744e-22	1.13127e-19	17166.1	17361.5	2155.79	1348.27	1049.73
ENSG00000075223	SEMA3C	2238.03	-3.3651	0.39571	-8.0962	5.67018e-16	7.96414e-14	5267.67	4651.72	761.232	280.513	229.033
ENSG00000174348	PODN	443.512	-3.3601	0.472761	-6.46272	1.02836e-10	6.83372e-09	689.964	1317.17	115.903	38.4574	56.0653
ENSG00000229108	AC005550.4	25.2548	-3.32995	0.833386	-3.79394	0.000148277	0.00261747	64.0606	58.7585	0	2.2622	1.19288
ENSG00000123689	G0S2	924.732	-3.29448	0.376533	-8.42773	3.52442e-17	5.98531e-15	2036.29	2022.27	245.051	190.025	130.024
ENSG00000053747	LAMA3	552.076	-3.26918	0.39667	-7.81462	5.51294e-15	6.92554e-13	2090.9	373.769	175.096	84.8325	35.7864
ENSG00000106624	AEBP1	38307.8	-3.26656	0.3544	-8.86243	7.82879e-19	1.61335e-16	83229.4	84640	12830	6027.63	4812.07
ENSG00000049540	ELN	55623.3	-3.24615	0.368831	-8.50692	1.78608e-17	3.11985e-15	101933	141128	16815.8	10937.7	7301.61
ENSG00000198108	CHSY3	3694.57	-3.24446	0.33098	-9.47528	2.66055e-21	7.50725e-19	4866.51	11361.6	617.181	799.688	827.858
ENSG00000179431	FJX1	666.057	-3.24226	0.375932	-8.2021	2.36233e-16	3.61062e-14	1694.98	1240.46	168.473	114.241	112.131
ENSG00000185760	KCNQ5	908.488	-3.23747	0.36565	-8.77325	1.73584e-18	3.49858e-16	1542.71	2303.01	109.28	339.33	248.119
ENSG00000261321	FAM101B	4637.38	-3.23719	0.345137	-8.93873	3.93652e-19	8.59519e-17	8094.74	12393.2	1175.58	696.758	826.665
ENSG00000077942	FBLN1	11044.5	-3.23653	0.361708	-8.56828	1.05045e-17	1.85253e-15	25189.5	23103.5	4059.9	1556.39	1313.36
ENSG00000196872	KIAA1211L	411.999	-3.22032	0.512914	-5.69284	1.24944e-08	5.87591e-07	393.815	1473.86	88.9966	52.0306	51.2938
ENSG00000108688	CCL7	77.0493	-3.21549	0.658531	-4.04219	5.29533e-05	0.00108759	287.748	66.9194	22.3526	2.2622	5.96439
ENSG00000203706	SERTAD4-AS1	97.3872	-3.21493	0.6161	-5.04373	4.56547e-07	1.6134e-05	178.53	257.885	14.9018	24.8842	10.7359
ENSG00000144057	ST6GAL2	411.08	-3.21472	0.416633	-7.67304	1.67966e-14	1.97479e-12	1162.54	572.896	87.7548	182.107	50.1009
ENSG00000115008	IL1A	53.3063	-3.21294	0.741669	-4.02885	5.60502e-05	0.00113845	246.791	4.89654	5.79513	9.0488	0
ENSG00000149968	MMP3	3620.49	-3.21031	0.331591	-9.03171	1.69006e-19	4.02562e-17	12456.1	3802.98	1012.49	294.086	536.795
ENSG00000049192	ADAMTS6	1206.26	-3.2011	0.342799	-8.99188	2.4303e-19	5.57177e-17	2935.24	2325.86	271.129	253.367	245.733
ENSG00000187955	COL14A1	11576.9	-3.19838	0.341934	-8.70219	3.25541e-18	6.35186e-16	23553.3	27701.4	3810.71	846.063	1973.02
ENSG00000183722	LHFP	3213.19	-3.19345	0.320121	-9.57773	9.92024e-22	2.88805e-19	6287.39	7798.56	759.576	544.059	676.362
ENSG00000243649	CFB	334.73	-3.18613	0.45788	-6.93084	4.18346e-12	3.65375e-10	866.394	556.574	45.9471	139.125	65.6083
ENSG00000100036	SLC35E4	1525.99	-3.18568	0.343781	-8.94221	3.81474e-19	8.42965e-17	2800.81	3838.89	343.154	339.33	307.763
ENSG00000197959	DNM3	323.622	-3.1856	0.562343	-5.68045	1.34342e-08	6.28564e-07	509.334	923.814	102.657	65.6038	16.7003
ENSG00000111863	ADTRP	184.627	-3.17335	0.520045	-5.75356	8.73828e-09	4.28526e-07	367.561	447.218	21.9387	33.933	52.4867
ENSG00000248610	HSPA8P4	91.6462	-3.14132	0.647936	-4.04427	5.24874e-05	0.00108165	131.272	287.264	23.1805	3.3933	13.1217
ENSG00000079337	RAPGEF3	689.836	-3.13597	0.483601	-6.4572	1.06658e-10	7.06213e-09	2021.59	964.619	63.7464	203.598	195.632
ENSG00000170571	EMB	332.817	-3.12558	0.442673	-6.49153	8.49664e-11	5.81481e-09	637.456	834.045	81.5458	41.8507	69.187
ENSG00000111262	KCNA1	105.765	-3.11511	0.620623	-4.46	8.19597e-06	0.00021232	84.0139	398.252	12.8321	15.8354	17.8932
ENSG00000116991	SIPA1L2	1030.64	-3.10757	0.35027	-8.49823	1.92509e-17	3.33096e-15	2110.85	2361.77	242.154	206.991	231.418
ENSG00000162745	OLFML2B	1862.63	-3.10576	0.46882	-6.31913	2.63033e-10	1.62434e-08	3243.99	4834.52	840.708	235.269	158.653
ENSG00000182379	NXPH4	694.641	-3.09749	0.411898	-7.00642	2.44491e-12	2.19814e-10	1452.39	1586.48	243.395	85.9636	104.973
ENSG00000105088	OLFM2	1194.65	-3.09053	0.429963	-6.68144	2.36599e-11	1.82331e-09	2586.58	2588.64	557.16	110.848	130.024
ENSG00000151892	GFRA1	563.981	-3.08434	0.517483	-6.0794	1.20633e-09	6.91417e-08	1127.89	1287.79	35.1847	144.781	224.261
ENSG00000164692	COL1A2	500337	-3.07472	0.393417	-7.3424	2.0979e-13	2.11204e-11	1.00747e+06	1.15412e+06	224576	54299.6	61224.5
ENSG00000102678	FGF9	56.7904	-3.06155	0.74142	-3.94626	7.93805e-05	0.00153254	208.985	52.2298	18.2133	4.5244	0
ENSG00000006210	CX3CL1	1847.12	-3.05888	0.373259	-7.9509	1.85155e-15	2.5155e-13	3726.02	4163.69	614.698	459.227	271.976
ENSG00000144229	THSD7B	22.2952	-3.05537	0.833176	-3.42638	0.000611682	0.00844794	59.8599	47.3333	0.827876	2.2622	1.19288
ENSG00000166348	USP54	1892.14	-3.05195	0.37673	-7.8949	2.90551e-15	3.83381e-13	5869.42	2218.13	374.2	624.368	374.564
ENSG00000181291	TMEM132E	16.9032	-3.04801	0.854173	-3.27187	0.00106838	0.013486	51.4585	32.6436	0.413938	0	0
ENSG00000183196	CHST6	651.989	-3.01861	0.38037	-7.85675	3.94227e-15	5.12803e-13	1221.35	1477.12	106.796	280.513	174.16
ENSG00000101825	MXRA5	3463.63	-3.01125	0.348233	-8.39052	4.84008e-17	7.99748e-15	6832.43	7870.38	516.18	813.261	1285.92
ENSG00000262061	RP11-1260E13.4	51.0424	-3.00248	0.766175	-4.28177	1.85415e-05	0.000435986	78.7631	155.057	0.413938	9.0488	11.9288
ENSG00000169862	CTNND2	31.6671	-2.99596	0.826433	-2.84306	0.00446832	0.0428852	132.322	19.5862	1.65575	0	4.77151
ENSG00000102109	PCSK1N	180.723	-2.99013	0.537785	-5.17569	2.27066e-07	8.69438e-06	285.647	507.608	45.5332	36.1952	28.6291
ENSG00000166482	MFAP4	18411.8	-2.97981	0.386723	-7.48038	7.41101e-14	7.94885e-12	32137.4	46022.6	6837.84	4487.08	2574.23
ENSG00000143816	WNT9A	773.407	-2.97949	0.397718	-7.13302	9.81925e-13	9.14187e-11	2285.18	1020.11	374.614	111.979	75.1513
ENSG00000140092	FBLN5	8704.43	-2.9775	0.348593	-8.23996	1.72274e-16	2.74754e-14	14339.1	22832.6	2566.41	2091.4	1692.69
ENSG00000189320	FAM180A	2513.32	-2.97095	0.443262	-6.47042	9.77293e-11	6.56576e-09	3659.86	7121.21	938.811	549.715	297.027
ENSG00000173698	GPR64	508.296	-2.96978	0.419286	-6.67435	2.48333e-11	1.90572e-09	1456.59	742.642	114.247	106.323	121.674
ENSG00000140945	CDH13	480.16	-2.96131	0.425416	-6.52078	6.9941e-11	4.85904e-09	740.373	1318.8	57.5374	62.2105	221.875
ENSG00000236841	AC007750.5	34.7853	-2.95794	0.778264	-3.54239	0.000396522	0.00587923	92.4153	68.5516	3.72544	5.6555	3.57864
ENSG00000137809	ITGA11	6784.42	-2.95534	0.349786	-8.22383	1.97106e-16	3.06365e-14	14157.4	14395.8	1048.92	1758.86	2561.11
ENSG00000205795	CYS1	563.809	-2.94419	0.418553	-7.03072	2.05467e-12	1.86558e-10	1065.93	1253.52	69.9555	236.4	193.246
ENSG00000101938	CHRDL1	1004.72	-2.94285	0.472246	-5.78203	7.38052e-09	3.65854e-07	2421.7	1805.19	646.571	68.9971	81.1157
ENSG00000255967	RP11-438L7.3	16.3844	-2.94016	0.854315	-2.96511	0.00302574	0.0313177	17.853	63.6551	0.413938	0	0
ENSG00000184731	FAM110C	490.724	-2.93775	0.417038	-6.66371	2.66999e-11	2.03197e-09	624.854	1493.45	99.3451	113.11	122.866
ENSG00000137877	SPTBN5	672.354	-2.92138	0.387632	-7.53325	4.94922e-14	5.43554e-12	1335.82	1380.83	115.489	349.51	180.125
ENSG00000234196	ZBTB12	16.375	-2.92013	0.852918	-3.48446	0.000493122	0.00708806	37.8063	44.0689	0	0	0
ENSG00000117069	ST6GALNAC5	351.964	-2.9195	0.526692	-4.80532	1.54502e-06	4.8357e-05	716.219	778.55	220.215	9.0488	35.7864
ENSG00000259091	LINC00517	26.142	-2.91723	0.829066	-3.46432	0.000531582	0.0074998	13.6523	110.988	0.413938	5.6555	0
ENSG00000166923	GREM1	5807.87	-2.90107	0.340894	-8.19114	2.58764e-16	3.85853e-14	20467.9	4010.27	3642.24	581.386	337.585
ENSG00000189409	MMP23B	528.317	-2.90055	0.507668	-5.00527	5.5783e-07	1.91595e-05	1258.11	976.044	334.462	18.0976	54.8724
ENSG00000157168	NRG1	109.37	-2.89989	0.681681	-4.2755	1.90712e-05	0.000445018	217.386	262.781	4.13938	12.4421	50.1009
ENSG00000124212	PTGIS	1248.39	-2.89643	0.344544	-8.11399	4.89842e-16	7.07417e-14	1984.83	3282.32	211.108	300.873	462.837
ENSG00000178860	MSC	384.22	-2.87426	0.428666	-6.26705	3.67949e-10	2.24204e-08	1134.19	510.873	165.989	59.9483	50.1009
ENSG00000172346	CSDC2	747.923	-2.86794	0.408284	-6.69411	2.16992e-11	1.67927e-09	1270.71	1906.39	242.982	177.583	141.953
ENSG00000151136	BTBD11	379.956	-2.86691	0.455914	-5.93518	2.93524e-09	1.56954e-07	534.539	1095.19	99.759	92.7502	77.5371
ENSG00000181195	PENK	46005.8	-2.85902	0.390191	-6.83088	8.43973e-12	6.97266e-10	65369.1	132293	16962.8	6855.6	8548.17
ENSG00000185245	GP1BA	15.9803	-2.85627	0.852205	-3.44105	0.000579469	0.00808216	47.2578	32.6436	0	0	0
ENSG00000146242	TPBG	2897.24	-2.85039	0.317611	-8.66748	4.41781e-18	8.35331e-16	5102.8	7082.03	589.861	682.054	1029.45
ENSG00000006283	CACNA1G	598.896	-2.84934	0.426129	-6.0909	1.12279e-09	6.47583e-08	1509.1	1033.17	322.458	48.6373	81.1157
ENSG00000140859	KIFC3	2450.97	-2.84768	0.31775	-8.73037	2.53837e-18	5.00604e-16	5488.21	4702.31	719.838	762.362	582.125
ENSG00000171812	COL8A2	4966.14	-2.84026	0.460464	-5.91419	3.33518e-09	1.77821e-07	11541.4	9177.75	2938.13	705.807	467.608
ENSG00000182107	TMEM30B	964.437	-2.8358	0.374572	-7.34181	2.10732e-13	2.11204e-11	1595.21	2428.69	269.06	313.315	215.911
ENSG00000175600	SUGCT	538.983	-2.8309	0.51761	-4.80698	1.53227e-06	4.804e-05	306.651	2092.46	114.661	90.488	90.6588
ENSG00000197584	KCNMB2	116.625	-2.82775	0.581288	-4.20923	2.56238e-05	0.000579491	101.867	412.942	15.3157	12.4421	40.5579
ENSG00000160282	FTCD	165.985	-2.82628	0.528201	-4.9674	6.7856e-07	2.27107e-05	482.03	233.402	42.6356	38.4574	33.4006
ENSG00000234836	AIF1	70.7852	-2.82442	0.757083	-4.04303	5.27642e-05	0.00108492	193.232	125.678	24.8363	10.1799	0
ENSG00000198113	TOR4A	1008.72	-2.8116	0.353502	-7.74665	9.43461e-15	1.13842e-12	2895.33	1289.42	405.659	307.659	145.531
ENSG00000165757	KIAA1462	2495.67	-2.81097	0.337626	-8.17869	2.86954e-16	4.21041e-14	4329.87	5879.12	415.594	873.21	980.546
ENSG00000220785	MTMR9LP	163.503	-2.80603	0.60436	-4.68882	2.74785e-06	7.91183e-05	359.16	339.494	76.5785	33.933	8.35015
ENSG00000118257	NRP2	2937.1	-2.79404	0.314142	-8.65023	5.1395e-18	9.52157e-16	6401.86	5766.5	812.56	895.832	808.772
ENSG00000109265	KIAA1211	674.104	-2.79398	0.377112	-7.14955	8.70611e-13	8.18866e-11	1236.05	1570.16	180.891	209.254	174.16
ENSG00000132000	PODNL1	826.599	-2.79249	0.366311	-7.39128	1.45423e-13	1.50689e-11	1966.98	1457.54	293.068	256.76	158.653
ENSG00000117122	MFAP2	4833.56	-2.78618	0.364219	-7.38957	1.47306e-13	1.51783e-11	9609.09	10470.4	2065.14	1201.23	821.893
ENSG00000095752	IL11	2550.03	-2.77639	0.34656	-7.64767	2.0466e-14	2.37574e-12	7303.96	3342.71	1390	390.23	323.27
ENSG00000206279	DAXX	45.0896	-2.75031	0.787678	-3.27924	0.00104088	0.0132025	153.325	50.5976	21.5248	0	0
ENSG00000142661	MYOM3	970.708	-2.74193	0.83823	-3.03562	0.00240038	0.0259431	1052.27	3556.52	183.374	33.933	27.4362
ENSG00000091972	CD200	74.1579	-2.73564	0.651797	-3.71955	0.000199579	0.00331866	165.927	158.322	16.1436	11.311	19.0861
ENSG00000148935	GAS2	1286.84	-2.72913	0.343803	-7.63648	2.23237e-14	2.559e-12	2610.73	2727.37	322.872	344.986	428.243
ENSG00000124225	PMEPA1	10669.9	-2.72824	0.37487	-6.95895	3.42809e-12	3.02282e-10	17533.7	26942.4	4350.9	2480.5	2042.21
ENSG00000141655	TNFRSF11A	119.454	-2.71645	0.641813	-3.20531	0.00134916	0.0163118	541.89	0	41.8077	13.5732	0
ENSG00000123700	KCNJ2	145.988	-2.71119	0.601205	-4.31407	1.60278e-05	0.000383267	337.106	282.367	14.0739	26.0153	70.3798
ENSG00000261295	RP11-524D16__A.3	366.03	-2.70352	0.438041	-5.7555	8.63865e-09	4.24776e-07	661.61	879.746	121.284	78.0459	89.4659
ENSG00000163453	IGFBP7	13818.2	-2.69576	0.386135	-6.51619	7.21164e-11	4.97251e-09	16465.7	42187	4642.31	2619.63	3176.64
ENSG00000150394	CDH8	32.0497	-2.689	0.804056	-3.48289	0.000496023	0.00710747	141.773	6.52872	2.89756	9.0488	0
ENSG00000162711	NLRP3	90.2416	-2.68143	0.664771	-3.3025	0.000958264	0.0123424	336.056	65.2872	18.2133	10.1799	21.4718
ENSG00000239756	PHF1	23.4059	-2.68073	0.840998	-4.09365	4.24626e-05	0.000898278	80.8634	29.3793	0	6.7866	0
ENSG00000139269	INHBE	214.383	-2.67647	0.576359	-4.27415	1.91868e-05	0.000447149	281.447	636.551	91.4803	36.1952	26.2433
ENSG00000148288	GBGT1	219.906	-2.6742	0.481631	-5.47264	4.43382e-08	1.93161e-06	359.16	535.355	44.7053	100.668	59.6439
ENSG00000116983	HPCAL4	50.3835	-2.67348	0.735922	-2.88495	0.00391477	0.0385818	102.917	120.781	19.869	0	8.35015
ENSG00000145794	MEGF10	1098.37	-2.67141	0.349013	-7.29025	3.09371e-13	3.06712e-11	1855.66	2715.95	310.453	257.891	351.899
ENSG00000014914	MTMR11	1479.69	-2.66887	0.358309	-7.16023	8.05393e-13	7.64633e-11	3611.55	2466.23	713.629	351.772	255.276
ENSG00000150275	PCDH15	14.6745	-2.66698	0.849232	-3.28604	0.00101607	0.0129415	47.2578	26.1149	0	0	0
ENSG00000186275	NBPF12	739.023	-2.66396	0.370304	-7.14194	9.20203e-13	8.61094e-11	1591.01	1323.7	238.428	385.705	156.267
ENSG00000124479	NDP	187.963	-2.65487	0.55661	-3.85573	0.000115386	0.00210787	202.684	612.068	68.2997	9.0488	47.7151
ENSG00000102359	SRPX2	3031.67	-2.65298	0.361306	-6.98167	2.91688e-12	2.60969e-10	4387.63	8244.15	1021.6	728.429	776.564
ENSG00000002079	MYH16	137.27	-2.6445	0.602271	-4.06923	4.71694e-05	0.000984224	204.784	365.609	10.3484	10.1799	95.4303
ENSG00000070729	CNGB1	41.0407	-2.64173	0.767935	-4.03626	5.43107e-05	0.00111049	165.927	16.3218	3.72544	19.2287	0
ENSG00000165973	NELL1	38.7404	-2.63863	0.765527	-2.84723	0.00441019	0.0424438	129.171	45.7011	8.27876	3.3933	7.15727
ENSG00000143126	CELSR2	231.188	-2.62801	0.47651	-5.7218	1.05403e-08	5.11429e-07	524.037	360.712	60.021	174.189	36.9792
ENSG00000132386	SERPINF1	7593.96	-2.62647	0.42566	-5.65602	1.54924e-08	7.15733e-07	12626.2	18688.5	4575.25	883.39	1196.46
ENSG00000109625	CPZ	164.71	-2.61598	0.584059	-3.96087	7.46783e-05	0.00145247	682.613	37.5402	40.5659	50.8995	11.9288
ENSG00000101680	LAMA1	486.165	-2.61235	0.492277	-4.80194	1.57138e-06	4.90147e-05	1755.89	332.965	109.694	115.372	116.902
ENSG00000185274	WBSCR17	668.498	-2.61031	0.375731	-6.47602	9.41726e-11	6.35008e-09	964.06	1818.25	135.358	106.323	318.499
ENSG00000186510	CLCNKA	98.2499	-2.60265	0.632498	-3.95049	7.79898e-05	0.00151047	219.486	195.862	11.5903	23.7531	40.5579
ENSG00000111432	FZD10	234.762	-2.59542	0.47804	-5.36427	8.12781e-08	3.36239e-06	288.798	657.769	43.8774	115.372	67.9941
ENSG00000114646	CSPG5	117.682	-2.59063	0.623871	-3.71305	0.00020478	0.00338977	199.533	301.954	56.7095	14.7043	15.5074
ENSG00000180772	AGTR2	83.5218	-2.58474	0.63899	-4.16867	3.06387e-05	0.000675415	268.845	81.6091	27.3199	35.0641	4.77151
ENSG00000170382	LRRN2	353.331	-2.5796	0.453406	-5.70998	1.12992e-08	5.43932e-07	734.072	657.769	61.6767	185.5	127.638
ENSG00000122176	FMOD	95529.3	-2.57857	0.293113	-8.66501	4.51456e-18	8.44914e-16	135370	242931	21796.7	41440.1	36109.6
ENSG00000168952	STXBP6	108.737	-2.57092	0.585598	-3.82391	0.000131354	0.00236193	154.376	308.482	23.1805	14.7043	42.9436
ENSG00000095303	PTGS1	323.364	-2.56503	0.489536	-4.83047	1.36209e-06	4.32216e-05	1009.22	349.287	79.0621	81.4392	97.816
ENSG00000050555	LAMC3	2213.83	-2.55235	0.344219	-7.66256	1.82259e-14	2.12918e-12	3116.92	4720.27	316.662	2032.59	882.73
ENSG00000163485	ADORA1	104.63	-2.55099	0.6114	-3.59959	0.000318721	0.00490247	128.121	321.54	30.2175	15.8354	27.4362
ENSG00000164125	FAM198B	1419.96	-2.54965	0.334231	-7.39439	1.42059e-13	1.4804e-11	2911.08	2799.19	441.672	489.767	458.065
ENSG00000214688	C10orf105	131.548	-2.54657	0.623979	-3.87528	0.0001065	0.00197305	142.824	417.838	43.0495	37.3263	16.7003
ENSG00000112210	RAB23	664.343	-2.54308	0.381937	-6.36126	2.001e-10	1.27077e-08	1292.76	1405.31	171.37	193.418	258.855
ENSG00000130635	COL5A1	84691.5	-2.53832	0.302678	-8.11301	4.93807e-16	7.07571e-14	183329	159025	35656.6	23599.3	21847.6
ENSG00000221866	PLXNA4	764.562	-2.5383	0.541949	-4.67417	2.95149e-06	8.45834e-05	1625.67	1361.24	734.326	62.2105	39.365
ENSG00000082781	ITGB5	7283.77	-2.53166	0.308416	-7.91951	2.38443e-15	3.19218e-13	13385.5	16142.3	2566.83	2051.82	2272.43
ENSG00000111245	MYL2	14.947	-2.53081	0.854021	-2.90308	0.00369507	0.0368323	13.6523	58.7585	0	1.1311	1.19288
ENSG00000077264	PAK3	161.754	-2.52803	0.542334	-4.27893	1.87793e-05	0.000439886	297.199	377.034	63.7464	36.1952	34.5935
ENSG00000266302	RP11-219A15.1	27.387	-2.52593	0.821789	-3.93065	8.47172e-05	0.00162192	80.8634	42.4367	0	12.4421	1.19288
ENSG00000087245	MMP2	16327.1	-2.51851	0.394802	-6.10966	9.98411e-10	5.79489e-08	35283.7	29764.5	11234.3	3065.28	2287.94
ENSG00000147251	DOCK11	898.39	-2.51824	0.358492	-6.77104	1.27858e-11	1.02853e-09	1940.72	1672.99	274.441	302.004	301.798
ENSG00000081277	PKP1	303.324	-2.51724	0.575338	-4.38672	1.15074e-05	0.000286375	589.148	638.183	222.699	47.5062	19.0861
ENSG00000112759	SLC29A1	4513.4	-2.51518	0.330546	-7.42587	1.12039e-13	1.18781e-11	7394.28	10552.1	1588.69	1774.7	1257.29
ENSG00000128203	ASPHD2	208.171	-2.51473	0.487918	-4.76717	1.8683e-06	5.64523e-05	333.955	525.562	49.2586	49.7684	82.3086
ENSG00000123610	TNFAIP6	521.927	-2.5125	0.40615	-5.66575	1.46382e-08	6.79695e-07	1808.4	341.126	368.405	46.3751	45.3294
ENSG00000102996	MMP15	170.999	-2.50652	0.526056	-4.63826	3.51352e-06	9.97546e-05	405.367	288.896	69.9555	63.3416	27.4362
ENSG00000196083	IL1RAP	1552.95	-2.50321	0.335112	-7.27511	3.46127e-13	3.41307e-11	2728.35	3440.64	500.451	607.401	487.887
ENSG00000142149	HUNK	203.138	-2.49325	0.501849	-4.20105	2.65678e-05	0.00059936	675.262	184.436	97.2754	16.9665	41.7507
ENSG00000273018	CTD-2303H24.2	66.6294	-2.48589	0.672305	-3.09853	0.00194482	0.0218031	95.5658	187.701	10.7624	4.5244	34.5935
ENSG00000005102	MEOX1	138.872	-2.48475	0.719992	-3.5655	0.000363169	0.00542963	185.881	396.62	107.21	2.2622	2.38576
ENSG00000050165	DKK3	5658.85	-2.48067	0.328034	-7.35314	1.93605e-13	1.96182e-11	13014.8	9434.01	2888.46	1793.93	1163.06
ENSG00000135363	LMO2	238.345	-2.47827	0.490047	-4.89579	9.791e-07	3.21572e-05	305.601	657.769	63.3325	101.799	63.2226
ENSG00000075213	SEMA3A	710.944	-2.47778	0.372682	-6.65662	2.80191e-11	2.12355e-09	1439.79	1248.62	191.239	460.358	214.718
ENSG00000223953	C1QTNF5	2504.37	-2.44294	0.429865	-5.29816	1.16974e-07	4.68432e-06	4513.65	5482.5	1729.02	395.885	400.807
ENSG00000087494	PTHLH	165.337	-2.44088	0.574317	-3.87296	0.000107519	0.00198392	411.668	257.885	124.595	15.8354	16.7003
ENSG00000102007	PLP2	2495.42	-2.42819	0.328032	-7.18162	6.889e-13	6.7208e-11	4987.28	4870.43	1047.68	882.258	689.484
ENSG00000106333	PCOLCE	8304.23	-2.42702	0.392255	-5.83577	5.35429e-09	2.72786e-07	14645.7	18564.4	4990.02	1703.44	1617.54
ENSG00000168280	KIF5C	29.2431	-2.42611	0.81923	-2.79416	0.00520341	0.0483603	101.867	31.0114	1.65575	4.5244	7.15727
ENSG00000186648	LRRC16B	104.613	-2.42593	0.601479	-3.72972	0.000191692	0.00322256	389.615	52.2298	43.4635	29.4086	8.35015
ENSG00000166033	HTRA1	31733.6	-2.42388	0.771489	-2.858	0.00426324	0.0413566	64586.8	74061.8	12285.7	4249.54	3484.4
ENSG00000077782	FGFR1	17053.2	-2.41934	0.313499	-7.48222	7.30773e-14	7.88418e-12	34871	32586.5	7401.62	5656.63	4750.04
ENSG00000133067	LGR6	165.005	-2.39739	0.545143	-3.99499	6.46967e-05	0.00128281	424.27	246.459	105.554	24.8842	23.8576
ENSG00000141750	STAC2	1205.73	-2.39488	0.488058	-4.33759	1.44052e-05	0.000349016	1352.62	3579.37	719.01	161.747	215.911
ENSG00000073756	PTGS2	4095.36	-2.39268	0.325394	-6.9535	3.56332e-12	3.12702e-10	12313.3	4413.42	1785.31	915.06	1049.73
ENSG00000121858	TNFSF10	101.002	-2.39095	0.598306	-3.80155	0.000143794	0.00254815	221.587	190.965	25.2502	36.1952	31.0148
ENSG00000251258	RFPL4B	41.2792	-2.38925	0.798398	-2.78325	0.00538167	0.0497256	86.1143	94.6665	24.4223	0	1.19288
ENSG00000128510	CPA4	168.45	-2.38295	0.52833	-4.00266	6.26345e-05	0.00124867	598.599	97.9309	112.177	19.2287	14.3145
ENSG00000119862	LGALSL	2055.37	-2.38229	0.32223	-7.1792	7.01188e-13	6.80449e-11	4300.46	3758.91	803.039	770.279	644.154
ENSG00000168056	LTBP3	8361.66	-2.37982	0.324401	-6.97707	3.0141e-12	2.68357e-10	14333.8	19235.3	3558.62	2014.49	2666.08
ENSG00000099204	ABLIM1	529.858	-2.37688	0.412186	-5.35409	8.59902e-08	3.5362e-06	929.404	1209.45	235.531	121.028	153.881
ENSG00000106819	ASPN	18266.7	-2.36484	0.812847	-2.86814	0.00412895	0.0403334	38382.8	42159.2	9281.31	782.722	727.656
ENSG00000197594	ENPP1	9651	-2.36342	0.333111	-7.11206	1.1432e-12	1.05364e-10	14041.9	21918.6	1681	5298.08	5315.47
ENSG00000149948	HMGA2	1199.68	-2.36306	0.383187	-5.82531	5.70079e-09	2.89164e-07	2522.52	2236.09	709.489	271.464	258.855
ENSG00000095713	CRTAC1	1960.22	-2.35842	0.40551	-5.35522	8.54517e-08	3.52196e-06	2782.96	5139.74	1003.39	381.181	493.852
ENSG00000198542	ITGBL1	10025.4	-2.35172	0.329146	-6.80974	9.7772e-12	7.96994e-10	11469	28912.5	2997.32	2839.06	3909.06
ENSG00000158125	XDH	92.6955	-2.34667	0.63452	-4.11809	3.82026e-05	0.00082046	166.978	194.23	9.10663	63.3416	29.822
ENSG00000162337	LRP5	2545.07	-2.34533	0.317931	-7.16468	7.79689e-13	7.44807e-11	4292.06	5635.92	732.67	942.207	1122.5
ENSG00000132334	PTPRE	2145.24	-2.34488	0.321476	-6.91342	4.73123e-12	4.09318e-10	3273.39	5316.01	589.861	462.62	1084.33
ENSG00000196735	HLA-DQA1	51.4481	-2.33926	0.828822	-3.41219	0.000644434	0.00884469	191.132	42.4367	0	3.3933	20.2789
ENSG00000006118	TMEM132A	445.393	-2.33872	0.432608	-5.11622	3.11727e-07	1.1412e-05	1122.64	636.551	289.756	104.061	73.9585
ENSG00000146555	SDK1	359.655	-2.3333	0.442383	-5.07495	3.87606e-07	1.39031e-05	908.401	507.608	111.349	150.436	120.481
ENSG00000196154	S100A4	404.852	-2.33069	0.511815	-4.37995	1.18706e-05	0.000293421	683.663	917.286	266.576	100.668	56.0653
ENSG00000101333	PLCB4	534.505	-2.32833	0.412732	-5.44736	5.11223e-08	2.20102e-06	997.665	1090.3	246.293	205.86	132.41
ENSG00000017427	IGF1	466.361	-2.32744	0.400289	-5.36903	7.91612e-08	3.29228e-06	635.355	1240.46	116.317	92.7502	246.926
ENSG00000138829	FBN2	18589.5	-2.32081	0.332041	-6.67155	2.53123e-11	1.93439e-09	29100.3	44649.9	8001.42	5253.96	5941.73
ENSG00000132561	MATN2	4122.02	-2.32028	0.361442	-5.96765	2.40693e-09	1.32569e-07	9906.29	6277.37	3115.71	550.846	759.864
ENSG00000113083	LOX	14360.1	-2.32003	0.296377	-7.56622	3.84234e-14	4.27105e-12	26123.1	30280.2	5029.76	4565.12	5802.16
ENSG00000105767	CADM4	273.103	-2.31555	0.536602	-4.05652	4.98095e-05	0.00103227	477.829	608.804	182.961	56.555	39.365
ENSG00000090006	LTBP4	6861.23	-2.3123	0.314477	-7.10603	1.19432e-12	1.09367e-10	16336.5	10450.9	3827.68	2068.78	1622.31
ENSG00000165623	UCMA	534.959	-2.31174	0.847097	-3.22946	0.00124025	0.0152463	391.715	2232.82	34.3568	14.7043	1.19288
ENSG00000081052	COL4A4	61.4404	-2.29917	0.707772	-2.96654	0.00301173	0.031208	244.691	17.954	14.9018	24.8842	4.77151
ENSG00000088387	DOCK9	583.724	-2.29756	0.385758	-5.7084	1.14041e-08	5.46115e-07	1098.48	1183.33	230.977	213.778	192.053
ENSG00000205336	GPR56	2606.88	-2.29706	0.34959	-6.43585	1.22787e-10	8.07181e-09	5260.32	4695.78	1387.93	1091.51	598.825
ENSG00000138271	GPR87	85.2488	-2.29541	0.728105	-3.14129	0.00168207	0.0194397	65.1108	300.321	32.2872	23.7531	4.77151
ENSG00000007171	NOS2	309.778	-2.28861	0.534106	-3.97902	6.91986e-05	0.00135941	473.628	760.596	202.416	63.3416	48.908
ENSG00000133216	EPHB2	618.704	-2.2872	0.434939	-5.00769	5.50882e-07	1.8992e-05	1240.26	1173.54	396.552	166.272	116.902
ENSG00000131094	C1QL1	1499.89	-2.27998	0.438665	-5.13748	2.78447e-07	1.0338e-05	2070.94	3708.32	793.105	651.514	275.555
ENSG00000006611	USH1C	1485.41	-2.27811	0.361992	-5.95117	2.6624e-09	1.44044e-07	2144.46	3745.86	597.312	425.294	514.131
ENSG00000159374	M1AP	81.7514	-2.27658	0.632239	-3.75852	0.000170924	0.00294082	116.569	205.655	11.5903	47.5062	27.4362
ENSG00000138028	CGREF1	181.527	-2.27133	0.586814	-3.52341	0.000426027	0.00625601	258.343	474.965	111.763	33.933	28.6291
ENSG00000170667	RASA4B	510.209	-2.27118	0.455834	-5.27867	1.30123e-07	5.17696e-06	945.157	891.171	72.8531	391.361	250.504
ENSG00000198759	EGFL6	907.103	-2.26028	0.472095	-4.26495	1.99945e-05	0.00046538	1471.29	2066.34	733.912	102.93	161.039
ENSG00000164932	CTHRC1	2478.86	-2.25671	0.437458	-4.78812	1.68351e-06	5.18944e-05	5067.09	4346.5	2321.36	311.053	348.321
ENSG00000235531	RP11-383H13.1	268.95	-2.25441	0.647598	-3.66371	0.000248587	0.00398891	472.578	545.148	309.625	9.0488	8.35015
ENSG00000166670	MMP10	179.892	-2.25311	0.598612	-3.27801	0.00104541	0.0132508	559.743	177.908	34.7708	32.8019	94.2374
ENSG00000164707	SLC13A4	306.053	-2.23475	0.543986	-3.83647	0.000124817	0.00225322	465.227	741.01	216.489	62.2105	45.3294
ENSG00000063180	CA11	155.874	-2.233	0.599114	-3.56898	0.000358367	0.00538755	279.346	339.494	106.382	35.0641	19.0861
ENSG00000227216	PFN1P5	11.7087	-2.22909	0.835879	-2.90364	0.00368855	0.0367872	21.0035	37.5402	0	0	0
ENSG00000157554	ERG	2621.39	-2.2272	0.419786	-4.99327	5.9366e-07	2.02009e-05	4028.47	6171.28	1702.11	650.383	554.688
ENSG00000134247	PTGFRN	1767.48	-2.21956	0.364287	-5.99799	1.99777e-09	1.11371e-07	3640.95	2986.89	465.266	890.176	854.101
ENSG00000174600	CMKLR1	3554.93	-2.21401	0.434012	-4.7928	1.64469e-06	5.09783e-05	4928.47	8918.24	2317.22	889.045	721.691
ENSG00000255201	RP11-350N15.4	69.8324	-2.20955	0.666756	-3.23248	0.00122723	0.0151166	190.081	93.0343	33.9429	23.7531	8.35015
ENSG00000214595	EML6	125.171	-2.2078	0.560986	-3.70478	0.000211577	0.00347748	281.447	213.816	48.4307	46.3751	35.7864
ENSG00000186897	C1QL4	211.741	-2.20399	0.532589	-3.81125	0.000138265	0.00246684	374.912	460.275	130.804	49.7684	42.9436
ENSG00000134013	LOXL2	8038.95	-2.2036	0.301544	-7.15966	8.08783e-13	7.64633e-11	15158.2	15091.1	3310.26	3772.22	2862.91
ENSG00000179862	CITED4	2694.34	-2.1993	0.364401	-5.96132	2.50207e-09	1.36986e-07	2476.31	7646.77	755.437	1662.72	930.445
ENSG00000151240	DIP2C	4397.35	-2.19465	0.308841	-6.8855	5.75839e-12	4.91231e-10	6858.69	9988.95	1557.23	1687.6	1894.29
ENSG00000162407	PPAP2B	2919.02	-2.18822	0.315599	-6.71863	1.83435e-11	1.44394e-09	4322.52	6843.74	980.619	1149.2	1299.04
ENSG00000182885	GPR97	23.9548	-2.18442	0.824104	-2.84174	0.00448677	0.0430397	60.9101	44.0689	4.55332	9.0488	1.19288
ENSG00000138944	KIAA1644	720.815	-2.18435	0.520397	-4.01405	5.96866e-05	0.00119987	1274.91	1424.89	731.842	97.2746	75.1513
ENSG00000006016	CRLF1	483.789	-2.17744	0.414408	-5.03778	4.70964e-07	1.65478e-05	997.665	855.263	250.432	184.369	131.217
ENSG00000198732	SMOC1	1230.47	-2.17579	0.429916	-4.72561	2.29426e-06	6.79196e-05	2055.19	2688.2	867.2	280.513	261.24
ENSG00000178773	CPNE7	98.586	-2.17417	0.628649	-3.26006	0.00111388	0.0140008	373.862	29.3793	32.7011	48.6373	8.35015
ENSG00000099889	ARVCF	298.948	-2.17343	0.45932	-4.52393	6.07016e-06	0.000161586	744.573	406.413	190.411	97.2746	56.0653
ENSG00000198805	PNP	7622.79	-2.17299	0.307329	-6.82724	8.65658e-12	7.11974e-10	11689.5	17580.2	2873.97	2753.1	3217.19
ENSG00000163739	CXCL1	831.114	-2.17007	0.466366	-3.2284	0.00124487	0.0152927	3514.93	75.0803	466.508	42.9818	56.0653
ENSG00000198168	SVIP	403.762	-2.16978	0.44616	-5.15682	2.51181e-07	9.49879e-06	715.169	677.355	73.267	380.05	172.967
ENSG00000163359	COL6A3	48130.1	-2.16567	0.308904	-6.77648	1.23141e-11	9.94946e-10	106824	76599.9	28344	15820.7	13062
ENSG00000106809	OGN	13992.6	-2.1646	0.394358	-4.99852	5.77712e-07	1.97315e-05	30322.7	22267.8	13487.3	1469.3	2415.58
ENSG00000101096	NFATC2	12442.4	-2.16427	0.394267	-5.10145	3.37067e-07	1.21936e-05	18359.1	29961.9	7900	2830.01	3161.13
ENSG00000099365	STX1B	73.1513	-2.15773	0.65345	-3.22689	0.00125144	0.0153529	221.587	71.816	26.492	33.933	11.9288
ENSG00000165209	STRBP	655.527	-2.15607	0.39198	-5.5397	3.02994e-08	1.35212e-06	1144.69	1211.08	168.059	460.358	293.448
ENSG00000002587	HS3ST1	78.6835	-2.15469	0.763902	-3.04393	0.00233513	0.0253724	266.744	65.2872	2.48363	13.5732	45.3294
ENSG00000140511	HAPLN3	3928.3	-2.15437	0.369396	-5.61088	2.01297e-08	9.116e-07	5473.51	9551.52	1906.6	1534.9	1174.99
ENSG00000183114	FAM43B	262.84	-2.15379	0.527215	-3.85186	0.000117223	0.00213167	412.718	610.436	165.161	75.7837	50.1009
ENSG00000176658	MYO1D	6514.35	-2.14617	0.317694	-6.60783	3.90004e-11	2.81617e-09	7818.55	16662.9	2069.69	3230.42	2790.14
ENSG00000167971	CASKIN1	60.9868	-2.14317	0.714115	-3.14538	0.00165869	0.0192604	152.275	94.6665	35.1847	19.2287	3.57864
ENSG00000102174	PHEX	105.068	-2.13487	0.593337	-3.09633	0.00195933	0.021939	49.3582	377.034	10.3484	15.8354	72.7656
ENSG00000198729	PPP1R14C	603.664	-2.13366	0.464703	-4.48026	7.45537e-06	0.000194508	514.585	1803.56	209.039	333.675	157.46
ENSG00000123243	ITIH5	3846.43	-2.12945	0.370486	-5.94584	2.75041e-09	1.48369e-07	6083.66	7155.48	674.719	3049.45	2268.85
ENSG00000164778	EN2	94.8895	-2.12166	0.620009	-3.68178	0.000231607	0.00375257	142.824	217.08	11.5903	58.8172	44.1365
ENSG00000112139	MDGA1	415.627	-2.12161	0.51593	-3.64892	0.000263347	0.0041964	1132.09	497.815	92.3081	79.177	276.748
ENSG00000115009	CCL20	1067.59	-2.12109	0.356473	-5.79038	7.02278e-09	3.49064e-07	2364.99	1627.28	608.489	459.227	277.941
ENSG00000047365	ARAP2	325.167	-2.11854	0.505991	-4.12319	3.73665e-05	0.000805333	685.764	543.516	57.5374	126.683	212.332
ENSG00000213901	SLC23A3	99.0519	-2.11572	0.624421	-3.32389	0.000887703	0.0115307	206.884	181.172	50.9144	39.5885	16.7003
ENSG00000102452	NALCN	727.167	-2.10462	0.371051	-5.44867	5.07471e-08	2.19001e-06	882.146	1883.54	217.317	299.742	353.092
ENSG00000158715	SLC45A3	180.28	-2.10443	0.50599	-4.0889	4.33423e-05	0.000912676	308.751	368.873	55.0537	99.5369	69.187
ENSG00000068305	MEF2A	8544.68	-2.0995	0.299399	-6.86358	6.71539e-12	5.5985e-10	13037.9	18649.3	2837.96	4048.21	4150.02
ENSG00000104177	MYEF2	194.024	-2.09895	0.574839	-3.90109	9.57621e-05	0.00179588	365.461	363.976	129.976	91.6191	19.0861
ENSG00000185559	DLK1	9739.21	-2.09657	0.324445	-6.57759	4.78135e-11	3.42558e-09	12437.2	20376.1	3422.02	9372.3	3088.36
ENSG00000250588	IQCJ-SCHIP1	1502.57	-2.09361	0.357574	-5.70766	1.1454e-08	5.47078e-07	2063.59	3535.3	610.972	757.837	545.145
ENSG00000198795	ZNF521	714.085	-2.09274	0.370129	-5.49054	4.00713e-08	1.75825e-06	1541.66	1121.31	358.884	330.281	218.297
ENSG00000106366	SERPINE1	77874	-2.08854	0.416104	-4.38415	1.16438e-05	0.000288984	77790.6	231339	43712.2	12358.4	24170.1
ENSG00000171680	PLEKHG5	1153.98	-2.08516	0.355755	-5.61763	1.93594e-08	8.78888e-07	2842.82	1539.15	499.209	458.096	430.629
ENSG00000175793	SFN	172.811	-2.08301	0.517377	-4.05315	5.05326e-05	0.00104545	375.962	262.781	53.8119	114.241	57.2582
ENSG00000138696	BMPR1B	214	-2.08212	0.504548	-4.05785	4.95268e-05	0.00102757	261.493	545.148	73.267	123.29	66.8012
ENSG00000197872	FAM49A	358.963	-2.08117	0.499519	-3.73206	0.000189921	0.00319866	810.734	548.413	324.941	47.5062	63.2226
ENSG00000163347	CLDN1	635.824	-2.0771	0.499773	-3.64531	0.000267073	0.00424187	490.431	2054.92	303.83	161.747	168.196
ENSG00000128567	PODXL	662.947	-2.07108	0.417732	-4.84315	1.27799e-06	4.07647e-05	721.47	1756.23	244.223	372.132	220.683
ENSG00000242038	EGFL8	13.5059	-2.06954	0.851419	-3.17348	0.00150623	0.0178001	16.8028	47.3333	0	3.3933	0
ENSG00000102271	KLHL4	391.219	-2.06887	0.423823	-4.51192	6.42423e-06	0.00016998	1184.6	342.758	221.457	114.241	93.0445
ENSG00000123094	RASSF8	2755	-2.0681	0.3168	-6.32858	2.47433e-10	1.55417e-08	4807.7	5472.7	992.623	1148.07	1353.92
ENSG00000142185	TRPM2	131.729	-2.06379	0.576862	-2.80023	0.00510657	0.0477125	455.776	81.6091	72.0252	15.8354	33.4006
ENSG00000079308	TNS1	6708.99	-2.06226	0.308052	-6.57632	4.82239e-11	3.43223e-09	10686.6	13819.7	2759.31	3602.56	2676.82
[truncated: 1,651 more rows]

## Sheet: supplemental file 2d
HESC-derived growth plate cartilage at 4 weeks of differentiation									HESC-derived growth plate cartilage at 8 weeks of differentiation									HESC-derived growth plate cartilage at 12 weeks of differentiation
[truncated: 85 more rows]

[truncated: 5 more sheets: supplemental file 2e, supplemental file 2f, supplemental file 2g, supplemental file 2h, supplemental file 2i]
