# Supplementary material for: Lineage-specific differences and regulatory networks governing human chondrocyte development
Source: eLife. 2023 Mar 15;12:e79925. doi: 10.7554/eLife.79925 (PMC10069868; doi:10.7554/eLife.79925)
Supplement: Supplementary file 3. — (a) Quality summary statistics for ATAC-seq samples. (b) Sets of differentially-accessible peaks, separated by their lineage bias. hg19 coordinates shown. (c) GREAT results for differentially-accessible peak sets. Description of column names and tests are available from the GREAT website. (d) HOMER de-novo motif analysis results for DA peaks in growth plate chondrocytes. (e) HOMER de-novo motif analysis results for DA peaks in articular chondrocytes. (f) Results of motif testing of all differentially-expressed transcription factors with the indicated DA peaksets. [file elife-79925-supp3.xlsx]

## Sheet: supplementary file 3a
Experiment	Treatment Type	Sequencing ID	Library Kit	Index	Reads	% Bases >= Q30
SP25	BMP4	BMP3-1-BR1	Illumina	TAGGCATG	67573139	92.22
SP28	BMP4	BMP1-1-BR2	Illumina	TCCTGAGC	93319366	92.89
SP30	BMP4	BMP3-A-BR3	Illumina	TAGGCATG	117560633	90.96
SP25	TGFB3	TGF3-B-BR3	Illumina	ACCACTGT	128107726	91.27
SP28	TGFB3	TGF3-1-BR1	Illumina	CGTACTAG	23359491	91.42
SP30	TGFB3	TGF3-1-BR2	Illumina	AGGCAGAA	69436515	91.05

## Sheet: supplementary file 3b
DA Peaks in in-vitro growth plate chondrocytes					DA Peaks in in-vitro articular chondrocytes
chr13	105800467	105800717			chr13	105998484	105998734
chr13	106644006	106644256			chr13	106971429	106971679
chr13	106808722	106808972			chr13	107028834	107029084
chr1	53978004	53978254			chr13	107187886	107188136
chr13	107160300	107160550			chr13	107220249	107220499
chr13	107175600	107175850			chr13	108093729	108093979
chr1	53992333	53992583			chr13	108103400	108103650
chr13	108118760	108119010			chr13	109115745	109115995
chr13	108395934	108396184			chr13	109643862	109644112
chr13	108520337	108520587			chr13	109808643	109808893
chr13	108645704	108645954			chr13	109835546	109835796
chr13	109555091	109555341			chr1	54011395	54011645
chr13	109568115	109568365			chr13	110076442	110076692
chr13	109571887	109572137			chr13	110147291	110147541
chr13	109610019	109610269			chr13	110280622	110280872
chr13	109758238	109758488			chr13	110436988	110437238
chr13	109851052	109851302			chr1	54105111	54105361
chr13	109895784	109896034			chr13	110762283	110762533
chr13	109909492	109909742			chr1	54120538	54120788
chr13	110042282	110042532			chr13	110911455	110911705
chr13	110048657	110048907			chr13	110937668	110937918
chr13	110496893	110497143			chr13	110959437	110959687
chr13	110527570	110527820			chr13	110975691	110975941
chr13	110550424	110550674			chr13	110993469	110993719
chr13	110747043	110747293			chr13	110995637	110995887
chr13	110775558	110775808			chr13	111000096	111000346
chr13	110902698	110902948			chr13	111039976	111040226
chr13	111173293	111173543			chr1	54204848	54205098
chr13	111567445	111567695			chr13	111358429	111358679
chr13	112625130	112625380			chr1	54304100	54304350
chr13	112827254	112827504			chr13	111452070	111452320
chr13	113165512	113165762			chr13	111659159	111659409
chr13	113344237	113344487			chr13	111767486	111767736
chr1	54411571	54411821			chr1	54355418	54355668
chr1	5976016	5976266			chr13	111923196	111923446
chr13	113394971	113395221			chr13	112075741	112075991
chr13	113461118	113461368			chr13	113241758	113242008
chr1	54482152	54482402			chr13	113655860	113656110
chr13	113871083	113871333			chr13	113759019	113759269
chr13	113951409	113951659			chr13	113841714	113841964
chr13	114011836	114012086			chr13	114070601	114070851
chr13	114057660	114057910			chr13	114462016	114462266
chr13	114060676	114060926			chr13	114488085	114488335
chr1	54501906	54502156			chr13	114600268	114600518
chr13	114065811	114066061			chr13	114884730	114884980
chr13	114077498	114077748			chr13	114890570	114890820
chr13	114201031	114201281			chr13	114894513	114894763
chr13	114428195	114428445			chr13	114896596	114896846
chr13	114511388	114511638			chr13	114909439	114909689
chr13	114524173	114524423			chr13	115084987	115085237
chr13	114781067	114781317			chr14	20869285	20869535
chr13	114812942	114813192			chr14	20881460	20881710
chr13	114864767	114865017			chr14	20938091	20938341
chr13	115034836	115035086			chr1	54693018	54693268
chr13	115079803	115080053			chr14	21165871	21166121
chr14	19010357	19010607			chr14	21439599	21439849
chr14	19024023	19024273			chr14	21455050	21455300
chr14	19026386	19026636			chr1	54719242	54719492
chr14	20811351	20811601			chr14	21539606	21539856
chr14	20923180	20923430			chr14	21555584	21555834
chr14	20929663	20929913			chr14	21723966	21724216
chr14	20980729	20980979			chr1	54741193	54741443
chr14	21131283	21131533			chr14	21945097	21945347
chr14	21523935	21524185			chr14	22025534	22025784
chr14	21647506	21647756			chr14	22807784	22808034
chr14	21776886	21777136			chr1	5998473	5998723
chr14	22384154	22384404			chr14	23005902	23006152
chr14	22802410	22802660			chr14	23015380	23015630
chr1	54744810	54745060			chr14	23317566	23317816
chr14	22857610	22857860			chr14	23320626	23320876
chr14	22901708	22901958			chr1	55008229	55008479
chr14	22918284	22918534			chr14	23830672	23830922
chr14	22954233	22954483			chr14	24563317	24563567
chr14	23058099	23058349			chr14	24664714	24664964
chr14	23083201	23083451			chr14	24682530	24682780
chr14	23288841	23289091			chr14	24685079	24685329
chr14	23388411	23388661			chr14	24707480	24707730
chr14	23540716	23540966			chr14	24777225	24777475
chr14	23547956	23548206			chr14	24835908	24836158
chr14	23564410	23564660			chr14	24899028	24899278
chr14	23584274	23584524			chr14	26356515	26356765
chr14	23615061	23615311			chr14	26423038	26423288
chr14	23624518	23624768			chr14	26674010	26674260
chr14	23643494	23643744			chr14	30150567	30150817
chr14	23770925	23771175			chr14	30218518	30218768
chr14	23845742	23845992			chr14	30396707	30396957
chr14	23961938	23962188			chr14	32407006	32407256
chr14	24075335	24075585			chr1	55473383	55473633
chr1	55035079	55035329			chr14	32897347	32897597
chr14	24502308	24502558			chr14	32954088	32954338
chr14	24578040	24578290			chr14	33078159	33078409
chr14	24583804	24584054			chr14	33171873	33172123
chr14	25011548	25011798			chr14	33178328	33178578
chr14	25330378	25330628			chr14	33230609	33230859
chr14	25580313	25580563			chr14	33408933	33409183
chr14	26228739	26228989			chr14	33496206	33496456
chr14	26668893	26669143			chr14	33777004	33777254
chr14	27303025	27303275			chr14	34085490	34085740
chr14	27311165	27311415			chr14	34522892	34523142
chr14	27340138	27340388			chr14	35099254	35099504
chr14	27559912	27560162			chr14	35342849	35343099
chr14	27712100	27712350			chr14	35839133	35839383
chr14	29176988	29177238			chr14	35868768	35869018
chr14	29235788	29236038			chr14	36004484	36004734
chr14	30919866	30920116			chr14	36295363	36295613
chr14	31022892	31023142			chr14	36347718	36347968
chr1	55416464	55416714			chr14	36560408	36560658
chr14	31443920	31444170			chr1	55776309	55776559
chr14	31537319	31537569			chr14	37693178	37693428
chr14	31560038	31560288			chr14	38064986	38065236
chr14	31698983	31699233			chr14	38288635	38288885
chr14	31847254	31847504			chr14	38371285	38371535
chr14	31926559	31926809			chr1	55909260	55909510
chr14	32497847	32498097			chr14	39191125	39191375
chr14	32546020	32546270			chr14	39278149	39278399
chr14	32724279	32724529			chr14	39644171	39644421
chr14	32780466	32780716			chr14	39736159	39736409
chr14	32949648	32949898			chr14	39901538	39901788
chr14	32978915	32979165			chr1	56046695	56046945
chr1	55487739	55487989			chr14	42076074	42076324
chr14	34152968	34153218			chr14	47911506	47911756
chr14	34407574	34407824			chr14	48145225	48145475
chr14	34848708	34848958			chr14	49979017	49979267
chr1	55593674	55593924			chr1	56120880	56121130
chr14	35015938	35016188			chr14	50100953	50101203
chr14	35025350	35025600			chr14	50154969	50155219
chr14	35030034	35030284			chr14	50234682	50234932
chr14	35603970	35604220			chr1	56161938	56162188
chr14	35805984	35806234			chr14	50459716	50459966
chr14	35810866	35811116			chr14	50505326	50505576
chr14	35843581	35843831			chr14	50511798	50512048
chr14	35847974	35848224			chr14	50527769	50528019
chr1	55710460	55710710			chr14	50552774	50553024
chr14	35873060	35873310			chr14	50778894	50779144
chr14	36139049	36139299			chr1	56483090	56483340
chr14	36853260	36853510			chr14	50812638	50812888
chr14	36920564	36920814			chr14	51242188	51242438
chr14	37152328	37152578			chr14	51297801	51298051
chr14	37591510	37591760			chr14	51561814	51562064
chr1	6076306	6076556			chr14	51863276	51863526
chr14	38296184	38296434			chr14	51865716	51865966
chr14	38334398	38334648			chr14	51909312	51909562
chr14	38608038	38608288			chr14	51925422	51925672
chr14	39495122	39495372			chr1	56546820	56547070
chr14	39830545	39830795			chr14	52327611	52327861
chr14	40310406	40310656			chr14	52372520	52372770
chr14	40778438	40778688			chr14	52389388	52389638
chr14	40984012	40984262			chr14	52535808	52536058
chr14	41423901	41424151			chr14	52543081	52543331
chr14	41452831	41453081			chr1	56681926	56682176
chr14	42684190	42684440			chr14	53019192	53019442
chr14	42992936	42993186			chr1	56842431	56842681
chr14	43276049	43276299			chr14	53268106	53268356
chr14	45600151	45600401			chr14	53385350	53385600
chr14	46175304	46175554			chr1	56877302	56877552
chr14	46337540	46337790			chr14	53858472	53858722
chr14	46598006	46598256			chr14	53976188	53976438
chr14	49851634	49851884			chr14	54863456	54863706
chr14	49872128	49872378			chr14	54928889	54929139
chr14	50053129	50053379			chr14	55104860	55105110
chr14	50237084	50237334			chr14	55233724	55233974
chr14	50259469	50259719			chr14	55240031	55240281
chr14	50329486	50329736			chr1	56922482	56922732
chr14	50334952	50335202			chr14	55493749	55493999
chr14	50394746	50394996			chr14	55518154	55518404
chr14	50396780	50397030			chr14	55538633	55538883
chr14	50787903	50788153			chr14	55544443	55544693
chr14	51144182	51144432			chr1	56982620	56982870
chr1	56526724	56526974			chr14	55595825	55596075
chr14	51422474	51422724			chr14	55658274	55658524
chr14	51614410	51614660			chr14	55737923	55738173
chr14	51710902	51711152			chr14	55914827	55915077
chr1	56539540	56539790			chr14	56046739	56046989
chr1	6217918	6218168			chr14	57046326	57046576
chr14	52063269	52063519			chr14	57735429	57735679
chr14	52168701	52168951			chr14	57857114	57857364
chr14	52294780	52295030			chr1	57044933	57045183
chr14	52794301	52794551			chr14	58300061	58300311
chr14	53393860	53394110			chr14	58666546	58666796
chr14	53657614	53657864			chr14	58711384	58711634
chr14	53835691	53835941			chr14	59093215	59093465
chr14	54137541	54137791			chr14	59104549	59104799
chr14	54833898	54834148			chr14	59198239	59198489
chr1	56880388	56880638			chr1	57154170	57154420
chr14	54970146	54970396			chr14	59655132	59655382
chr1	56912505	56912755			chr14	59674922	59675172
chr14	55153256	55153506			chr14	59799493	59799743
chr14	55158707	55158957			chr14	59895186	59895436
chr14	55197362	55197612			chr14	59920983	59921233
chr14	55262869	55263119			chr14	59931702	59931952
chr14	55306499	55306749			chr14	60975684	60975934
chr14	55556246	55556496			chr14	60981750	60982000
chr14	55564692	55564942			chr1	58262346	58262596
chr14	55849826	55850076			chr14	61116143	61116393
chr14	55852222	55852472			chr14	61418561	61418811
chr1	57009174	57009424			chr14	61570406	61570656
chr14	56090972	56091222			chr14	61614788	61615038
chr14	56246953	56247203			chr14	61619796	61620046
chr14	56421962	56422212			chr14	61645452	61645702
chr14	56584749	56584999			chr14	61650863	61651113
chr14	57430114	57430364			chr14	61686047	61686297
chr14	58545048	58545298			chr14	61692906	61693156
chr14	59214046	59214296			chr14	61747373	61747623
chr14	59409322	59409572			chr14	61822654	61822904
chr14	59628598	59628848			chr14	61972810	61973060
chr14	59729811	59730061			chr14	61992077	61992327
chr1	58192846	58193096			chr14	62014213	62014463
chr14	60031904	60032154			chr14	62031397	62031647
chr14	60144584	60144834			chr14	62040888	62041138
chr14	60174952	60175202			chr14	62052420	62052670
chr14	60715758	60716008			chr1	59084040	59084290
chr14	61109248	61109498			chr14	62091940	62092190
chr1	59049877	59050127			chr14	62676106	62676356
chr14	62004239	62004489			chr14	63645764	63646014
chr14	62020540	62020790			chr14	63670792	63671042
chr14	62070457	62070707			chr14	64010014	64010264
chr14	62161899	62162149			chr14	64108602	64108852
chr14	62431814	62432064			chr14	64194657	64194907
chr14	63050546	63050796			chr14	64912280	64912530
chr14	63158932	63159182			chr14	64931974	64932224
chr14	63902604	63902854			chr14	64970812	64971062
chr14	64389878	64390128			chr1	59221137	59221387
chr14	64453909	64454159			chr14	65095833	65096083
chr14	64549594	64549844			chr14	65121015	65121265
chr14	64699205	64699455			chr14	65148865	65149115
chr14	64905340	64905590			chr14	65170971	65171221
chr14	65003325	65003575			chr14	65174867	65175117
chr14	65140512	65140762			chr14	65186976	65187226
chr14	65636136	65636386			chr14	65228836	65229086
chr14	65717911	65718161			chr14	65231526	65231776
chr14	66300119	66300369			chr14	65273259	65273509
chr14	66505330	66505580			chr14	65438858	65439108
chr14	67399310	67399560			chr14	65651184	65651434
chr14	67809806	67810056			chr14	65823124	65823374
chr14	67826531	67826781			chr14	66510709	66510959
chr14	67860572	67860822			chr14	66974598	66974848
chr14	67924634	67924884			chr14	67707805	67708055
chr14	68089951	68090201			chr1	59314568	59314818
chr1	59340566	59340816			chr14	67880990	67881240
chr14	68407612	68407862			chr14	68141515	68141765
chr14	68677668	68677918			chr14	68161498	68161748
chr14	68745689	68745939			chr14	68286316	68286566
chr14	69014380	69014630			chr14	68699385	68699635
chr14	69017103	69017353			chr14	69002247	69002497
chr14	69030131	69030381			chr1	59347213	59347463
chr14	69065472	69065722			chr14	69010912	69011162
chr14	69260264	69260514			chr14	69154404	69154654
chr14	69285960	69286210			chr14	69162108	69162358
chr14	69310633	69310883			chr14	69445954	69446204
chr14	69406781	69407031			chr14	69472516	69472766
chr1	59388028	59388278			chr14	69506002	69506252
chr14	70273454	70273704			chr14	69512614	69512864
chr1	59398531	59398781			chr14	69535862	69536112
chr14	70656074	70656324			chr14	69546278	69546528
chr14	71276387	71276637			chr14	69555401	69555651
chr14	71284442	71284692			chr14	69619744	69619994
chr14	71999168	71999418			chr14	69726674	69726924
chr1	59434344	59434594			chr14	69730148	69730398
chr14	72270262	72270512			chr14	69735670	69735920
chr14	72653329	72653579			chr14	69822654	69822904
chr1	59522932	59523182			chr14	70010464	70010714
chr14	73688866	73689116			chr14	70092122	70092372
chr14	73704060	73704310			chr14	70115249	70115499
chr1	59527599	59527849			chr14	70152051	70152301
chr14	74163344	74163594			chr14	70186339	70186589
chr14	74190785	74191035			chr14	70193667	70193917
chr14	74220960	74221210			chr14	70346002	70346252
chr14	74231575	74231825			chr14	70377656	70377906
chr14	74261470	74261720			chr14	70387894	70388144
chr14	74318480	74318730			chr14	70394905	70395155
chr1	59680525	59680775			chr14	70460869	70461119
chr14	75130656	75130906			chr14	70487539	70487789
chr14	75489902	75490152			chr14	71757842	71758092
chr14	75536044	75536294			chr14	71786899	71787149
chr14	75614281	75614531			chr14	72170310	72170560
chr14	75670876	75671126			chr14	72183113	72183363
chr14	75704245	75704495			chr14	73075062	73075312
chr14	75721212	75721462			chr14	73110039	73110289
chr14	75740052	75740302			chr14	73360746	73360996
chr1	59841012	59841262			chr14	73493770	73494020
chr14	75748053	75748303			chr14	73603018	73603268
chr14	75760795	75761045			chr14	73930210	73930460
chr14	75766210	75766460			chr14	74079090	74079340
chr14	76044792	76045042			chr14	74111515	74111765
chr14	76102562	76102812			chr14	74257049	74257299
chr14	76114824	76115074			chr14	74977774	74978024
chr14	76127292	76127542			chr14	74981433	74981683
chr1	6320080	6320330			chr14	75033532	75033782
chr14	77279093	77279343			chr14	75038666	75038916
chr14	77506903	77507153			chr14	75050860	75051110
chr14	77542573	77542823			chr14	75061761	75062011
chr14	77564332	77564582			chr14	75079272	75079522
chr14	77647943	77648193			chr14	75083374	75083624
chr14	77653314	77653564			chr1	59738115	59738365
chr14	77781200	77781450			chr14	75301530	75301780
chr14	77978276	77978526			chr14	75422198	75422448
chr14	78062962	78063212			chr14	75469300	75469550
chr14	78432312	78432562			chr14	76112591	76112841
chr14	78446218	78446468			chr14	76334283	76334533
chr14	78721623	78721873			chr14	76343712	76343962
chr14	80469541	80469791			chr14	76815260	76815510
chr14	80664546	80664796			chr14	76818406	76818656
chr14	80674868	80675118			chr14	77168338	77168588
chr14	81005456	81005706			chr14	77227986	77228236
chr1	60071462	60071712			chr14	77234676	77234926
chr14	81007728	81007978			chr14	77416922	77417172
chr14	81053537	81053787			chr1	59899213	59899463
chr14	81075805	81076055			chr14	77422920	77423170
chr14	81644606	81644856			chr14	77425722	77425972
chr1	60144562	60144812			chr14	77428208	77428458
chr14	81866680	81866930			chr14	77444352	77444602
chr14	81873316	81873566			chr14	77504394	77504644
chr14	82208022	82208272			chr1	59987174	59987424
chr14	82276994	82277244			chr14	77773504	77773754
chr14	82854220	82854470			chr14	77787195	77787445
chr14	83222395	83222645			chr14	77843294	77843544
chr14	85292779	85293029			chr14	77923858	77924108
chr1	60173003	60173253			chr14	77952733	77952983
chr14	85783118	85783368			chr1	60062166	60062416
chr14	86231248	86231498			chr14	78023268	78023518
chr14	88331019	88331269			chr14	78227410	78227660
chr14	89462066	89462316			chr14	78266585	78266835
chr14	89500235	89500485			chr14	79219194	79219444
chr14	89642458	89642708			chr14	79745552	79745802
chr14	89794210	89794460			chr14	80631381	80631631
chr14	89796695	89796945			chr14	80855402	80855652
chr14	89892451	89892701			chr14	81408046	81408296
chr14	89947548	89947798			chr14	81421134	81421384
chr14	90388644	90388894			chr14	81636787	81637037
chr14	90762580	90762830			chr14	81672528	81672778
chr14	90832055	90832305			chr14	81790465	81790715
chr14	90909842	90910092			chr14	81832606	81832856
chr14	91446180	91446430			chr14	81902724	81902974
chr14	91615859	91616109			chr14	81921786	81922036
chr14	91621482	91621732			chr14	82000169	82000419
chr14	91631044	91631294			chr1	60169280	60169530
chr14	91637084	91637334			chr14	83322584	83322834
chr14	91703703	91703953			chr14	83629406	83629656
chr14	91836248	91836498			chr14	85524569	85524819
chr14	91840972	91841222			chr14	85903618	85903868
chr14	91949071	91949321			chr14	85938171	85938421
chr14	92339766	92340016			chr14	85953671	85953921
chr1	61038798	61039048			chr14	85983196	85983446
chr14	92593408	92593658			chr14	86002810	86003060
chr14	93052470	93052720			chr14	86033136	86033386
chr14	93485656	93485906			chr14	87555058	87555308
chr14	94230838	94231088			chr14	87575101	87575351
chr1	6336556	6336806			chr14	87599751	87600001
chr14	94735656	94735906			chr14	88033242	88033492
chr14	94789342	94789592			chr14	88094596	88094846
chr14	94797292	94797542			chr14	88336032	88336282
chr14	94851408	94851658			chr14	88851893	88852143
chr14	94858965	94859215			chr14	89029351	89029601
chr14	94904934	94905184			chr14	89259117	89259367
chr14	95290317	95290567			chr14	89507096	89507346
chr14	95827662	95827912			chr14	90084364	90084614
chr14	95927426	95927676			chr14	90280174	90280424
chr14	95967466	95967716			chr14	90379060	90379310
chr14	95997858	95998108			chr14	90421075	90421325
chr14	96014192	96014442			chr1	60598738	60598988
chr1	61608853	61609103			chr14	90849562	90849812
chr14	96633862	96634112			chr14	90885642	90885892
chr14	96692263	96692513			chr14	90979925	90980175
chr14	96829627	96829877			chr14	91012406	91012656
chr14	96963550	96963800			chr1	60619344	60619594
chr14	98238023	98238273			chr14	91282672	91282922
chr14	99372872	99373122			chr14	91294451	91294701
chr14	99419958	99420208			chr14	91586381	91586631
chr1	61709926	61710176			chr1	60637484	60637734
chr14	99947334	99947584			chr14	91694877	91695127
chr14	100021316	100021566			chr14	91709865	91710115
chr14	100150324	100150574			chr14	91716544	91716794
chr1	61803791	61804041			chr14	91724513	91724763
chr14	100412367	100412617			chr14	91833541	91833791
chr14	100670796	100671046			chr14	92040818	92041068
chr14	100704994	100705244			chr14	92364749	92364999
chr14	100729539	100729789			chr14	92961405	92961655
chr14	101106804	101107054			chr14	92967041	92967291
chr14	101213428	101213678			chr14	92977871	92978121
chr14	101254805	101255055			chr14	92997912	92998162
chr14	101287308	101287558			chr14	93007001	93007251
chr14	101507210	101507460			chr14	93019876	93020126
chr1	6373530	6373780			chr1	61085792	61086042
chr14	102188528	102188778			chr14	93113861	93114111
chr14	102414451	102414701			chr14	93214875	93215125
chr14	102495160	102495410			chr14	93581637	93581887
chr14	102553366	102553616			chr14	94425894	94426144
chr14	102606010	102606260			chr14	94461411	94461661
chr14	102783244	102783494			chr14	94492542	94492792
chr14	103058769	103059019			chr14	94812862	94813112
chr14	103459955	103460205			chr14	94840131	94840381
chr14	103621435	103621685			chr1	61516194	61516444
chr14	103627326	103627576			chr14	94948140	94948390
chr14	103665160	103665410			chr14	95009905	95010155
chr14	103762362	103762612			chr14	95038271	95038521
chr1	62330244	62330494			chr14	95112890	95113140
chr14	103800321	103800571			chr14	95120453	95120703
chr14	103901271	103901521			chr14	95534544	95534794
chr14	103968328	103968578			chr14	95727188	95727438
chr14	103995314	103995564			chr14	95731830	95732080
chr1	62534770	62535020			chr14	95739530	95739780
chr14	104006996	104007246			chr14	95757444	95757694
chr14	104029064	104029314			chr14	95842558	95842808
chr14	104043012	104043262			chr14	95946427	95946677
chr14	104060882	104061132			chr14	95974221	95974471
chr14	104130342	104130592			chr14	95982896	95983146
chr1	62587988	62588238			chr14	96520374	96520624
chr14	104188026	104188276			chr14	96551819	96552069
chr14	104200012	104200262			chr14	96715392	96715642
chr14	104346308	104346558			chr14	96735424	96735674
chr14	104376662	104376912			chr14	97263543	97263793
chr14	104544370	104544620			chr14	97646694	97646944
chr1	62696439	62696689			chr14	97923390	97923640
chr14	104603941	104604191			chr14	99502395	99502645
chr14	104742200	104742450			chr14	99997547	99997797
chr14	105132087	105132337			chr14	100046222	100046472
chr14	105202686	105202936			chr14	100070668	100070918
chr14	105213250	105213500			chr14	100086266	100086516
chr14	105235055	105235305			chr14	100109217	100109467
chr14	105292774	105293024			chr14	100233208	100233458
chr14	105554600	105554850			chr14	100599139	100599389
chr1	63087713	63087963			chr1	61899982	61900232
chr14	105558042	105558292			chr14	100772788	100773038
chr14	105690554	105690804			chr14	100842575	100842825
chr14	105781009	105781259			chr14	100895178	100895428
chr1	6385616	6385866			chr14	100905558	100905808
chr14	105957263	105957513			chr14	101159597	101159847
chr14	105965836	105966086			chr14	101282293	101282543
chr14	106803880	106804130			chr14	101338130	101338380
chr15	20353376	20353626			chr14	102537702	102537952
chr15	20509831	20510081			chr1	62190692	62190942
chr15	20550332	20550582			chr14	102771458	102771708
chr15	21001126	21001376			chr14	102829147	102829397
chr15	21315480	21315730			chr14	103243736	103243986
chr15	21360029	21360279			chr14	103271817	103272067
chr15	22007666	22007916			chr14	103490280	103490530
chr15	22491124	22491374			chr14	103603336	103603586
chr15	22830906	22831156			chr14	103838965	103839215
chr15	22904346	22904596			chr14	103979278	103979528
chr15	22985298	22985548			chr14	104064092	104064342
chr15	23034354	23034604			chr14	104091276	104091526
chr15	23626320	23626570			chr14	104343326	104343576
chr15	24018263	24018513			chr14	105144132	105144382
chr15	24457212	24457462			chr14	105147281	105147531
chr15	24525847	24526097			chr14	105155757	105156007
chr15	24598058	24598308			chr1	62787176	62787426
chr15	24730990	24731240			chr14	105266771	105267021
chr15	25684153	25684403			chr14	105332119	105332369
chr15	25813993	25814243			chr14	105436917	105437167
chr15	25854559	25854809			chr14	105439647	105439897
chr15	25927460	25927710			chr14	105491292	105491542
chr15	25939231	25939481			chr14	105537192	105537442
chr15	25982489	25982739			chr14	105877351	105877601
chr15	26020753	26021003			chr1	63153940	63154190
chr15	26055778	26056028			chr14	105940468	105940718
chr15	26098221	26098471			chr14	105950965	105951215
chr15	26107948	26108198			chr14	105978377	105978627
chr1	64101430	64101680			chr1	63249460	63249710
chr15	26834348	26834598			chr15	22892525	22892775
chr15	26927053	26927303			chr15	23086577	23086827
chr15	27581793	27582043			chr15	23127656	23127906
chr15	27656141	27656391			chr15	23208392	23208642
chr15	28201535	28201785			chr15	23272837	23273087
chr15	28344460	28344710			chr15	23378137	23378387
chr15	28352466	28352716			chr15	25642348	25642598
chr1	64135398	64135648			chr15	25749561	25749811
chr15	28939972	28940222			chr15	25856784	25857034
chr1	64140106	64140356			chr1	64059239	64059489
chr15	29949116	29949366			chr15	25861627	25861877
chr15	30141453	30141703			chr15	25963126	25963376
chr15	30209934	30210184			chr15	26030498	26030748
chr15	30217652	30217902			chr15	26035486	26035736
chr15	30357310	30357560			chr15	26076245	26076495
chr15	31215096	31215346			chr15	26129066	26129316
chr15	31375292	31375542			chr15	26137296	26137546
chr15	31383770	31384020			chr15	26150387	26150637
chr15	31408950	31409200			chr15	26297488	26297738
chr15	31435662	31435912			chr15	26436442	26436692
chr15	31618651	31618901			chr15	29269622	29269872
chr15	31631215	31631465			chr1	6445776	6446026
chr15	31658101	31658351			chr15	29570724	29570974
chr15	31684544	31684794			chr15	29763094	29763344
chr15	31689482	31689732			chr15	29990571	29990821
chr15	31733688	31733938			chr15	30704789	30705039
chr15	31898439	31898689			chr15	30721088	30721338
chr15	32092155	32092405			chr1	64211964	64212214
chr15	32095169	32095419			chr15	30829340	30829590
chr15	32162888	32163138			chr15	30845615	30845865
chr15	33142600	33142850			chr15	31186611	31186861
chr15	33194692	33194942			chr1	64239534	64239784
chr15	33197692	33197942			chr15	31508040	31508290
chr15	33360862	33361112			chr1	64256905	64257155
chr15	33447010	33447260			chr15	31727050	31727300
chr15	33586216	33586466			chr15	31846568	31846818
chr15	33760004	33760254			chr15	32746160	32746410
chr15	33872781	33873031			chr15	32762410	32762660
chr15	34257002	34257252			chr15	32870759	32871009
chr15	34870214	34870464			chr15	32887069	32887319
chr15	34880542	34880792			chr15	32976404	32976654
chr15	34985378	34985628			chr15	33009797	33010047
chr15	35012021	35012271			chr15	33162696	33162946
chr15	35014193	35014443			chr1	64412742	64412992
chr15	35148200	35148450			chr15	33244369	33244619
chr15	35292766	35293016			chr15	33271950	33272200
chr15	35598862	35599112			chr15	33323547	33323797
chr1	64649739	64649989			chr15	34013190	34013440
chr15	35983060	35983310			chr1	64598826	64599076
chr15	36050102	36050352			chr15	34531643	34531893
chr15	36724420	36724670			chr15	34627411	34627661
chr15	37203812	37204062			chr15	34630184	34630434
chr15	38381264	38381514			chr15	34659347	34659597
chr15	38479896	38480146			chr1	64602788	64603038
chr15	38509536	38509786			chr15	35261897	35262147
chr15	38519230	38519480			chr15	35462524	35462774
chr15	38591448	38591698			chr15	35950107	35950357
chr15	38690432	38690682			chr15	36045814	36046064
chr15	38965292	38965542			chr15	38376546	38376796
chr15	39044040	39044290			chr15	38421674	38421924
chr15	39110642	39110892			chr1	64774788	64775038
chr15	39146428	39146678			chr15	39006489	39006739
chr15	39157262	39157512			chr1	64935665	64935915
chr15	39317681	39317931			chr15	39371685	39371935
chr15	39445517	39445767			chr1	65089508	65089758
chr15	39481180	39481430			chr15	39754978	39755228
chr15	39593887	39594137			chr1	65210585	65210835
chr15	39626938	39627188			chr15	40212396	40212646
chr15	39901790	39902040			chr15	40376864	40377114
chr15	39933621	39933871			chr1	65300510	65300760
chr15	40074721	40074971			chr15	40531419	40531669
chr15	40125804	40126054			chr15	41062056	41062306
chr15	40355904	40356154			chr15	41099623	41099873
chr15	40361400	40361650			chr1	6557554	6557804
chr15	40380886	40381136			chr15	41198362	41198612
chr15	40385041	40385291			chr15	41233675	41233925
chr15	40391012	40391262			chr15	41245355	41245605
chr15	40395643	40395893			chr15	41277188	41277438
chr15	40428495	40428745			chr15	41782596	41782846
chr15	40633002	40633252			chr15	41785792	41786042
chr15	40886305	40886555			chr1	65432147	65432397
chr15	41038652	41038902			chr15	42187061	42187311
chr15	41069052	41069302			chr15	42218836	42219086
chr15	41127412	41127662			chr15	42226020	42226270
chr15	41186456	41186706			chr15	42500422	42500672
chr15	41196240	41196490			chr15	42840892	42841142
chr15	41408644	41408894			chr1	65532442	65532692
chr15	41573522	41573772			chr15	43415178	43415428
chr1	65420812	65421062			chr15	43546144	43546394
chr15	41836202	41836452			chr15	43982163	43982413
chr15	41870602	41870852			chr15	44038416	44038666
chr15	41877954	41878204			chr15	44092654	44092904
chr15	41913593	41913843			chr15	44116708	44116958
chr15	41941110	41941360			chr15	44487464	44487714
chr15	41952632	41952882			chr15	44828850	44829100
chr15	42120205	42120455			chr1	65859106	65859356
chr15	42222833	42223083			chr15	45410319	45410569
chr15	42323409	42323659			chr15	45414292	45414542
chr15	42376766	42377016			chr15	45455165	45455415
chr15	42660231	42660481			chr15	45459102	45459352
chr15	42783236	42783486			chr15	45480274	45480524
chr15	42787654	42787904			chr15	45670325	45670575
chr15	43013296	43013546			chr15	45748873	45749123
chr15	43146900	43147150			chr15	45927045	45927295
chr15	43359982	43360232			chr1	66277786	66278036
chr15	43733116	43733366			chr15	47669695	47669945
chr15	44084328	44084578			chr15	47958346	47958596
chr15	44507849	44508099			chr15	48009399	48009649
chr15	44975486	44975736			chr15	48042678	48042928
chr15	45145534	45145784			chr15	48049099	48049349
chr15	45329378	45329628			chr1	6614509	6614759
chr15	45679626	45679876			chr15	48085757	48086007
chr15	45842017	45842267			chr15	48469846	48470096
chr15	46947278	46947528			chr15	48577972	48578222
chr15	47586027	47586277			chr15	48623492	48623742
chr15	47623963	47624213			chr15	48665972	48666222
chr15	48751732	48751982			chr15	48677762	48678012
chr15	48763382	48763632			chr15	48687754	48688004
chr15	48858238	48858488			chr15	48689873	48690123
chr15	48963844	48964094			chr15	48704320	48704570
chr15	49338638	49338888			chr1	66696869	66697119
chr15	49368048	49368298			chr15	48851537	48851787
chr15	49540896	49541146			chr15	49095126	49095376
chr15	50195026	50195276			chr15	49097890	49098140
chr15	50219768	50220018			chr1	66722962	66723212
chr15	50295952	50296202			chr15	49218114	49218364
chr15	50456638	50456888			chr15	49227500	49227750
chr15	50533928	50534178			chr15	49238402	49238652
chr15	50647247	50647497			chr15	50123925	50124175
chr15	50716384	50716634			chr15	50344101	50344351
chr15	50978882	50979132			chr1	66749462	66749712
chr15	51121068	51121318			chr15	51123951	51124201
chr15	51369395	51369645			chr15	51496042	51496292
chr15	51379590	51379840			chr15	52029724	52029974
chr15	51401468	51401718			chr15	52121737	52121987
chr15	51425064	51425314			chr15	52167512	52167762
chr15	51515975	51516225			chr15	52395748	52395998
chr1	66758649	66758899			chr15	52471945	52472195
chr15	51668441	51668691			chr15	52545018	52545268
chr15	51895798	51896048			chr1	66797786	66798036
chr15	52088997	52089247			chr15	52789016	52789266
chr15	52118238	52118488			chr15	52820965	52821215
chr15	52199742	52199992			chr15	52971500	52971750
chr15	52273610	52273860			chr1	66801747	66801997
chr15	52387862	52388112			chr15	54441404	54441654
chr15	52580590	52580840			chr15	55534140	55534390
chr15	52640593	52640843			chr15	55880296	55880546
chr15	52945718	52945968			chr1	6639867	6640117
chr15	52990827	52991077			chr1	66850148	66850398
chr15	53029982	53030232			chr15	56757242	56757492
chr15	53082508	53082758			chr15	57025644	57025894
chr15	53828765	53829015			chr15	57613004	57613254
chr15	55923180	55923430			chr15	57778131	57778381
chr15	56084215	56084465			chr15	57798316	57798566
chr15	56159433	56159683			chr15	57829291	57829541
chr15	56210047	56210297			chr15	57972299	57972549
chr15	56538095	56538345			chr15	57998667	57998917
chr15	56648868	56649118			chr1	66930499	66930749
chr15	57124419	57124669			chr15	58839580	58839830
chr15	57768743	57768993			chr15	59462449	59462699
chr1	66902195	66902445			chr1	66999622	66999872
chr15	58331008	58331258			chr1	67029961	67030211
chr15	58688493	58688743			chr15	59642382	59642632
chr15	58816641	58816891			chr15	59664979	59665229
chr15	59090870	59091120			chr1	67142696	67142946
chr15	59148334	59148584			chr1	67165136	67165386
chr15	59279733	59279983			chr15	61092488	61092738
chr15	59467172	59467422			chr15	61097294	61097544
chr15	59524730	59524980			chr15	61423776	61424026
chr15	59566415	59566665			chr15	62391355	62391605
chr15	59568901	59569151			chr15	62411663	62411913
chr15	59588460	59588710			chr1	67191641	67191891
chr15	59596274	59596524			chr15	62910632	62910882
chr15	59598910	59599160			chr15	63031414	63031664
chr15	59606003	59606253			chr15	63143011	63143261
chr15	59653182	59653432			chr1	67217992	67218242
chr15	59886662	59886912			chr15	63305450	63305700
chr15	59981523	59981773			chr15	63334592	63334842
chr15	60016864	60017114			chr15	63664487	63664737
chr15	60154959	60155209			chr15	63802369	63802619
chr15	60366370	60366620			chr1	67395955	67396205
chr15	60663575	60663825			chr15	65042582	65042832
chr15	60666871	60667121			chr1	67485459	67485709
chr15	60685284	60685534			chr15	65176234	65176484
chr15	60690194	60690444			chr15	65186188	65186438
chr15	60694622	60694872			chr15	66232254	66232504
chr15	60942436	60942686			chr1	67519286	67519536
chr15	60952841	60953091			chr15	66679011	66679261
chr15	61044874	61045124			chr15	67012640	67012890
chr15	61176550	61176800			chr15	67021970	67022220
chr15	61342233	61342483			chr15	67122708	67122958
chr15	61356195	61356445			chr15	67336610	67336860
chr15	61407413	61407663			chr15	67413446	67413696
chr1	67170796	67171046			chr1	67813721	67813971
chr15	61562506	61562756			chr15	68664666	68664916
chr15	62379941	62380191			chr15	68878590	68878840
chr15	62718778	62719028			chr1	67896017	67896267
chr15	62725036	62725286			chr15	69951942	69952192
chr15	62747613	62747863			chr15	70145954	70146204
chr15	62765132	62765382			chr15	70488135	70488385
chr15	62898687	62898937			chr15	70797966	70798216
chr15	63178834	63179084			chr1	67929220	67929470
chr15	63340414	63340664			chr15	71087740	71087990
chr15	63396992	63397242			chr15	71145945	71146195
chr15	63400474	63400724			chr15	71375799	71376049
chr15	63573272	63573522			chr1	67934074	67934324
chr15	63697430	63697680			chr15	71587720	71587970
chr15	63734364	63734614			chr1	67944792	67945042
chr15	63766442	63766692			chr15	72514833	72515083
chr15	63796486	63796736			chr1	68024940	68025190
chr15	63892914	63893164			chr15	73517740	73517990
chr15	63920534	63920784			chr15	73989385	73989635
chr15	64310172	64310422			chr15	74190258	74190508
chr15	64312060	64312310			chr15	74218633	74218883
chr15	64388059	64388309			chr15	74222774	74223024
chr15	64418399	64418649			chr15	74249124	74249374
chr15	64439330	64439580			chr15	74275021	74275271
chr15	64752647	64752897			chr15	74677523	74677773
chr15	64912572	64912822			chr15	74689362	74689612
chr15	65290189	65290439			chr15	74695314	74695564
chr15	65477665	65477915			chr15	74726188	74726438
chr15	65588361	65588611			chr1	68176189	68176439
chr1	67504038	67504288			chr15	75155766	75156016
chr15	65597030	65597280			chr1	68179138	68179388
chr15	66125088	66125338			chr15	75959137	75959387
chr15	66903628	66903878			chr15	76003837	76004087
chr15	66994397	66994647			chr15	76013481	76013731
chr1	67628684	67628934			chr15	77363352	77363602
chr15	67016141	67016391			chr15	77480092	77480342
chr15	67048772	67049022			chr15	77748178	77748428
chr15	67095574	67095824			chr15	77835051	77835301
chr15	67175744	67175994			chr1	68281030	68281280
chr15	67342176	67342426			chr15	78286464	78286714
chr15	67390796	67391046			chr15	78297469	78297719
chr15	67418032	67418282			chr15	79049471	79049721
chr15	67442878	67443128			chr15	80263447	80263697
chr15	68155844	68156094			chr1	68578744	68578994
chr15	68208079	68208329			chr15	80453008	80453258
chr15	68346473	68346723			chr15	81384610	81384860
chr15	68549478	68549728			chr15	81426460	81426710
chr15	68567573	68567823			chr1	68639805	68640055
chr15	68569950	68570200			chr1	68643718	68643968
chr15	68647342	68647592			chr15	82399076	82399326
chr1	6673541	6673791			chr15	82415177	82415427
chr15	68711009	68711259			chr15	82425189	82425439
chr15	68915856	68916106			chr15	82470466	82470716
chr15	69326820	69327070			chr15	82554957	82555207
chr15	69886873	69887123			chr15	82647110	82647360
chr15	69901608	69901858			chr15	82926152	82926402
chr15	70315578	70315828			chr15	82944578	82944828
chr1	67926958	67927208			chr15	83182871	83183121
chr15	70391909	70392159			chr15	83992305	83992555
chr15	70434503	70434753			chr15	84048358	84048608
chr15	70767462	70767712			chr15	84898818	84899068
chr15	70779098	70779348			chr15	85144063	85144313
chr15	70785147	70785397			chr15	85174451	85174701
chr15	70800174	70800424			chr1	68808449	68808699
chr15	70862250	70862500			chr15	85197409	85197659
chr15	71118950	71119200			chr1	68850118	68850368
chr15	71155862	71156112			chr15	85491630	85491880
chr15	72329740	72329990			chr1	68962745	68962995
chr15	72410451	72410701			chr15	85923613	85923863
chr15	72468552	72468802			chr15	86131449	86131699
chr15	72476506	72476756			chr15	86151211	86151461
chr15	72564954	72565204			chr1	6803944	6804194
chr15	72612446	72612696			chr15	88021066	88021316
chr15	72651086	72651336			chr15	88308074	88308324
chr15	72668252	72668502			chr15	88320257	88320507
chr15	72963083	72963333			chr15	89164714	89164964
chr15	73029298	73029548			chr15	89192446	89192696
chr15	73076012	73076262			chr15	89202546	89202796
chr15	73089386	73089636			chr15	89253005	89253255
chr15	73130655	73130905			chr1	70686980	70687230
chr15	73925710	73925960			chr15	89559880	89560130
chr1	68084344	68084594			chr15	89611566	89611816
chr15	73928882	73929132			chr15	89645153	89645403
chr1	68118576	68118826			chr1	70820312	70820562
chr15	74358296	74358546			chr15	90293989	90294239
chr15	74373230	74373480			chr1	70876636	70876886
chr15	74493326	74493576			chr15	90364492	90364742
chr15	74712144	74712394			chr15	90755131	90755381
chr15	74838504	74838754			chr15	90808759	90809009
chr15	74867676	74867926			chr15	90895338	90895588
chr15	75074228	75074478			chr15	91388460	91388710
chr15	75165559	75165809			chr15	91499833	91500083
chr15	75230334	75230584			chr15	91503168	91503418
chr15	75353694	75353944			chr15	91801527	91801777
chr15	75442528	75442778			chr15	92058684	92058934
chr15	75468044	75468294			chr15	92105005	92105255
chr15	75576579	75576829			chr15	92237670	92237920
chr15	75746360	75746610			chr15	92396801	92397051
chr15	75913098	75913348			chr15	92410974	92411224
chr15	75918014	75918264			chr15	92555596	92555846
chr15	76008610	76008860			chr15	92612888	92613138
chr15	76050773	76051023			chr15	93257939	93258189
chr15	76069304	76069554			chr15	93381284	93381534
chr15	76129287	76129537			chr15	94010597	94010847
chr15	76603747	76603997			chr15	94302900	94303150
chr15	76660484	76660734			chr1	72748427	72748677
chr15	77223854	77224104			chr15	94472980	94473230
chr15	77376188	77376438			chr15	94485822	94486072
chr15	77899448	77899698			chr15	94569731	94569981
chr15	78168885	78169135			chr15	95384672	95384922
chr15	78357837	78358087			chr15	96590751	96591001
chr15	78591905	78592155			chr15	96870513	96870763
chr15	78730316	78730566			chr15	99645077	99645327
chr15	79195046	79195296			chr1	74663728	74663978
chr15	79198520	79198770			chr15	99864365	99864615
chr15	79223306	79223556			chr15	99965420	99965670
chr15	79280920	79281170			chr15	99984378	99984628
chr1	68482141	68482391			chr15	99995224	99995474
chr15	80361057	80361307			chr15	100016786	100017036
chr15	80448326	80448576			chr15	100026704	100026954
chr15	80521582	80521832			chr15	100347029	100347279
chr15	80538745	80538995			chr15	100573446	100573696
chr15	80609826	80610076			chr15	100583676	100583926
chr15	81042002	81042252			chr15	100600771	100601021
chr15	81081758	81082008			chr15	100671774	100672024
chr1	68608088	68608338			chr15	100681660	100681910
chr15	81097520	81097770			chr15	100882161	100882411
chr15	81438350	81438600			chr1	75198694	75198944
chr15	81482124	81482374			chr15	101430347	101430597
chr15	81546905	81547155			chr15	101459433	101459683
chr15	82202106	82202356			chr15	101665152	101665402
chr15	82287622	82287872			chr15	101710909	101711159
chr15	82374869	82375119			chr15	101741645	101741895
chr15	82422150	82422400			chr1	76081606	76081856
chr15	82540695	82540945			chr1	76190223	76190473
chr15	82737584	82737834			chr15	102501652	102501902
chr15	82815104	82815354			chr16	134701	134951
chr15	83007264	83007514			chr1	76231440	76231690
chr15	83114031	83114281			chr16	1047579	1047829
chr15	83378503	83378753			chr16	1146083	1146333
chr15	83587974	83588224			chr1	76540365	76540615
chr15	84362917	84363167			chr16	2059742	2059992
chr15	84433126	84433376			chr16	2174977	2175227
chr15	84599565	84599815			chr16	3019089	3019339
chr15	84625694	84625944			chr1	77291835	77292085
chr15	84763524	84763774			chr16	3639538	3639788
chr15	84841412	84841662			chr1	77436862	77437112
chr15	84915236	84915486			chr16	4143574	4143824
chr15	84976571	84976821			chr16	4349170	4349420
chr15	84981670	84981920			chr16	4365864	4366114
chr15	85043832	85044082			chr16	4418975	4419225
chr15	85114017	85114267			chr1	7351420	7351670
chr15	85367705	85367955			chr16	4710674	4710924
chr15	85384076	85384326			chr16	5966864	5967114
chr15	85473162	85473412			chr1	77747482	77747732
chr15	85524402	85524652			chr16	8944381	8944631
chr15	85861652	85861902			chr16	10215442	10215692
chr15	85874410	85874660			chr16	11073961	11074211
chr15	85887798	85888048			chr16	11178344	11178594
chr15	86328858	86329108			chr16	11295834	11296084
chr1	69161878	69162128			chr1	78225344	78225594
chr15	86484819	86485069			chr1	7359387	7359637
chr15	86502895	86503145			chr16	15239452	15239702
chr15	86558403	86558653			chr16	15583416	15583666
chr15	87422868	87423118			chr16	15743898	15744148
chr15	87459124	87459374			chr1	78445024	78445274
chr15	88620647	88620897			chr16	16070793	16071043
chr15	88670302	88670552			chr16	16092279	16092529
chr15	89225049	89225299			chr16	17425049	17425299
chr1	70599974	70600224			chr1	78511990	78512240
chr15	89248654	89248904			chr16	17565252	17565502
chr15	89257979	89258229			chr16	19010111	19010361
chr15	89260180	89260430			chr16	19017146	19017396
chr15	89268644	89268894			chr16	19178974	19179224
chr15	89291368	89291618			chr16	19702584	19702834
chr15	89306155	89306405			chr16	20917536	20917786
chr15	89312870	89313120			chr16	20949885	20950135
chr15	89335963	89336213			chr16	21780695	21780945
chr15	89346473	89346723			chr1	78957349	78957599
chr15	89414968	89415218			chr16	23477846	23478096
chr15	89420186	89420436			chr1	79297435	79297685
chr15	89437751	89438001			chr16	23690023	23690273
chr15	89461110	89461360			chr1	79306664	79306914
chr15	89475650	89475900			chr16	24680798	24681048
chr15	89564562	89564812			chr1	79472386	79472636
chr15	89929164	89929414			chr16	25963396	25963646
chr15	89939346	89939596			chr16	27188770	27189020
chr15	90198576	90198826			chr16	27248891	27249141
chr15	90233828	90234078			chr16	27379402	27379652
chr15	90355388	90355638			chr16	27419319	27419569
chr15	90388801	90389051			chr16	27444053	27444303
chr15	90701271	90701521			chr16	27532406	27532656
chr15	90744552	90744802			chr16	27781326	27781576
chr15	90777133	90777383			chr1	81691983	81692233
chr1	71418300	71418550			chr16	28742547	28742797
chr15	90931264	90931514			chr1	82136048	82136298
chr15	90964765	90965015			chr16	28891201	28891451
chr15	91135890	91136140			chr1	82266936	82267186
chr15	91305311	91305561			chr16	29232065	29232315
chr15	91414855	91415105			chr16	29280550	29280800
chr15	91417384	91417634			chr16	29283392	29283642
chr15	91427236	91427486			chr1	82691182	82691432
chr1	72030996	72031246			chr16	29836574	29836824
chr15	93164322	93164572			chr1	82842941	82843191
chr1	72113318	72113568			chr16	30032886	30033136
chr15	93347276	93347526			chr1	83616910	83617160
chr15	93352386	93352636			chr1	83620126	83620376
chr15	93363627	93363877			chr16	31063542	31063792
chr15	93425642	93425892			chr1	84257488	84257738
chr15	93449956	93450206			chr1	84464713	84464963
chr15	93456958	93457208			chr16	46893805	46894055
chr15	93573058	93573308			chr16	46917868	46918118
chr15	93865015	93865265			chr1	84543601	84543851
chr15	93978056	93978306			chr16	47766738	47766988
chr15	94426977	94427227			chr1	84719676	84719926
chr15	94623672	94623922			chr16	48545633	48545883
chr15	94717720	94717970			chr1	84764065	84764315
chr15	94749794	94750044			chr16	48590768	48591018
chr15	94774588	94774838			chr1	84831341	84831591
chr15	95235944	95236194			chr16	49665648	49665898
chr1	73626581	73626831			chr16	49698110	49698360
chr15	95508773	95509023			chr16	49738216	49738466
chr15	95562531	95562781			chr1	84867838	84868088
chr15	97017413	97017663			chr1	7531244	7531494
chr1	73649205	73649455			chr16	49797830	49798080
chr15	97627971	97628221			chr16	50279318	50279568
chr15	98235104	98235354			chr16	50285358	50285608
chr15	98302697	98302947			chr16	50608172	50608422
chr15	98447464	98447714			chr16	50626026	50626276
chr15	98665315	98665565			chr1	84971802	84972052
chr15	98971631	98971881			chr16	53075486	53075736
chr15	99108792	99109042			chr16	53077446	53077696
chr1	74059163	74059413			chr16	53114595	53114845
chr15	99111282	99111532			chr16	53128092	53128342
chr15	99191645	99191895			chr16	53253698	53253948
chr15	99270842	99271092			chr1	85064845	85065095
chr15	99295158	99295408			chr16	53737749	53737999
chr15	99331758	99332008			chr1	85156126	85156376
chr15	99416134	99416384			chr16	55314470	55314720
chr15	99421437	99421687			chr16	55702377	55702627
chr1	74092154	74092404			chr1	85164418	85164668
chr15	99457962	99458212			chr16	56459342	56459592
chr15	99463372	99463622			chr16	56485196	56485446
chr15	99497713	99497963			chr16	56648458	56648708
chr15	99526682	99526932			chr16	56725918	56726168
chr15	99573680	99573930			chr16	57350578	57350828
chr15	99707850	99708100			chr16	57406192	57406442
chr15	99791367	99791617			chr16	57563975	57564225
chr15	99861854	99862104			chr16	57625222	57625472
chr15	100243866	100244116			chr16	57662302	57662552
chr15	100273592	100273842			chr16	57668220	57668470
chr1	75180388	75180638			chr16	57677058	57677308
chr1	6978715	6978965			chr16	57679996	57680246
chr15	100765002	100765252			chr1	85320151	85320401
chr15	100777633	100777883			chr16	57807616	57807866
chr15	100781870	100782120			chr16	57836302	57836552
chr15	100890865	100891115			chr16	57846492	57846742
chr15	101056006	101056256			chr16	57850249	57850499
chr15	101099577	101099827			chr16	57972872	57973122
chr15	101403934	101404184			chr16	58059550	58059800
chr15	101564352	101564602			chr16	58155736	58155986
chr15	101604116	101604366			chr16	58283726	58283976
chr15	101610884	101611134			chr16	58328985	58329235
chr15	101661720	101661970			chr16	58452712	58452962
chr15	101708340	101708590			chr16	58455536	58455786
chr15	101723900	101724150			chr16	58529074	58529324
chr15	101986977	101987227			chr16	58533853	58534103
chr15	102068724	102068974			chr1	85410682	85410932
chr15	102077959	102078209			chr16	58768154	58768404
chr15	102094352	102094602			chr16	64195344	64195594
chr15	102097016	102097266			chr16	64425315	64425565
chr15	102156624	102156874			chr16	64512319	64512569
chr16	60852	61102			chr1	85514024	85514274
chr16	103571	103821			chr16	65156161	65156411
chr16	152080	152330			chr16	65559004	65559254
chr16	279153	279403			chr16	65572878	65573128
chr16	284637	284887			chr16	65580122	65580372
chr16	293514	293764			chr16	65692251	65692501
chr16	377390	377640			chr16	65918124	65918374
chr16	402981	403231			chr1	85553861	85554111
chr16	436877	437127			chr16	66257244	66257494
chr16	441966	442216			chr16	66460881	66461131
chr16	451708	451958			chr1	85557566	85557816
chr16	492610	492860			chr16	66694747	66694997
chr16	639776	640026			chr16	66907110	66907360
chr16	660880	661130			chr16	67126208	67126458
chr16	686704	686954			chr16	67217954	67218204
chr1	76433488	76433738			chr16	67427368	67427618
chr16	778308	778558			chr16	67430299	67430549
chr16	790905	791155			chr16	67490622	67490872
chr16	838479	838729			chr16	67571230	67571480
chr16	1020865	1021115			chr16	67694609	67694859
chr1	76471974	76472224			chr16	67931147	67931397
chr16	1031531	1031781			chr16	67951790	67952040
chr16	1034172	1034422			chr1	85744620	85744870
chr16	1052784	1053034			chr16	68344786	68345036
chr16	1075364	1075614			chr16	68411862	68412112
chr16	1128559	1128809			chr1	85755210	85755460
chr16	1205054	1205304			chr16	68524986	68525236
chr16	1232396	1232646			chr16	68563854	68564104
chr16	1358977	1359227			chr16	69166382	69166632
chr16	1429012	1429262			chr1	85760598	85760848
chr16	1470727	1470977			chr16	69364435	69364685
chr16	1662035	1662285			chr1	85777911	85778161
chr16	1728078	1728328			chr16	69969180	69969430
chr1	76572554	76572804			chr16	70285741	70285991
chr1	7177897	7178147			chr1	85786038	85786288
chr16	1739262	1739512			chr16	70494906	70495156
chr16	1832684	1832934			chr1	85791722	85791972
chr16	1876789	1877039			chr16	70780272	70780522
chr16	1993223	1993473			chr16	70784968	70785218
chr16	2009361	2009611			chr1	85796064	85796314
chr16	2014799	2015049			chr1	85826872	85827122
chr1	76581084	76581334			chr1	85872847	85873097
chr16	2021859	2022109			chr16	73023565	73023815
chr16	2033912	2034162			chr1	85906394	85906644
chr16	2065479	2065729			chr16	73102837	73103087
chr16	2085692	2085942			chr16	73226456	73226706
chr16	2091162	2091412			chr16	73236039	73236289
chr16	2178491	2178741			chr1	85911716	85911966
chr1	76609906	76610156			chr16	74441007	74441257
chr16	2186018	2186268			chr1	85930425	85930675
chr16	2198479	2198729			chr16	75150588	75150838
chr16	2205481	2205731			chr16	75272586	75272836
chr16	2255463	2255713			chr16	75279132	75279382
chr16	2264968	2265218			chr16	75285496	75285746
chr16	2273423	2273673			chr16	75411976	75412226
chr16	2301580	2301830			chr16	75529214	75529464
chr16	2390754	2391004			chr16	75532912	75533162
chr16	2479169	2479419			chr16	75573100	75573350
chr16	2563689	2563939			chr16	75623285	75623535
chr16	2570196	2570446			chr16	75628004	75628254
chr16	2581944	2582194			chr16	77332582	77332832
chr16	2587785	2588035			chr16	77533356	77533606
chr16	2618679	2618929			chr16	77619836	77620086
chr16	2647250	2647500			chr16	78950888	78951138
chr16	2649198	2649448			chr16	79048015	79048265
chr16	2653245	2653495			chr1	86042329	86042579
chr16	2681329	2681579			chr16	79226056	79226306
chr16	2723389	2723639			chr16	79406451	79406701
chr16	2727692	2727942			chr16	80061011	80061261
chr16	2732325	2732575			chr16	80716650	80716900
chr16	2771078	2771328			chr16	81110684	81110934
chr16	2802447	2802697			chr16	81439415	81439665
chr16	2885825	2886075			chr16	81527373	81527623
chr16	2918253	2918503			chr1	86064796	86065046
chr16	2932635	2932885			chr16	81678928	81679178
chr16	2955391	2955641			chr16	81727174	81727424
chr16	2961724	2961974			chr16	81737170	81737420
chr16	3030450	3030700			chr16	81764088	81764338
chr16	3156537	3156787			chr16	81812736	81812986
chr16	3200558	3200808			chr16	81895175	81895425
chr16	3207233	3207483			chr16	82667656	82667906
chr16	3232590	3232840			chr16	83566792	83567042
chr16	3314466	3314716			chr16	84001810	84002060
chr16	3333200	3333450			chr16	84058516	84058766
chr16	3355306	3355556			chr1	86094982	86095232
chr16	3451002	3451252			chr16	84566084	84566334
chr1	77415222	77415472			chr16	84800644	84800894
chr16	3507860	3508110			chr16	84822681	84822931
chr16	3550805	3551055			chr16	84839932	84840182
chr16	3559615	3559865			chr16	84855397	84855647
chr16	3564202	3564452			chr16	84869832	84870082
chr16	3661482	3661732			chr16	85070726	85070976
chr16	3709284	3709534			chr16	85160542	85160792
chr16	3795914	3796164			chr16	85194148	85194398
chr16	3821640	3821890			chr16	85196062	85196312
chr16	3930702	3930952			chr16	86430609	86430859
chr16	4000443	4000693			chr16	86491237	86491487
chr16	4166355	4166605			chr16	86568836	86569086
chr16	4233833	4234083			chr16	86620003	86620253
chr16	4303861	4304111			chr16	86698138	86698388
chr16	4323221	4323471			chr16	86832339	86832589
chr16	4340311	4340561			chr16	86857919	86858169
chr1	77464352	77464602			chr16	86985577	86985827
chr16	4357645	4357895			chr1	86861867	86862117
chr16	4378230	4378480			chr16	87212675	87212925
chr16	4401219	4401469			chr16	87260916	87261166
chr16	4428258	4428508			chr16	87572198	87572448
chr1	77497104	77497354			chr16	87812748	87812998
chr16	4475689	4475939			chr16	87929332	87929582
chr16	4524534	4524784			chr1	87170362	87170612
chr16	4544438	4544688			chr16	87997011	87997261
chr16	4580906	4581156			chr16	88220307	88220557
chr16	4588705	4588955			chr16	88268263	88268513
chr16	4664787	4665037			chr16	88276381	88276631
chr1	77505484	77505734			chr16	88278871	88279121
chr16	4743428	4743678			chr16	88491038	88491288
chr16	4897263	4897513			chr16	88767422	88767672
chr16	5007940	5008190			chr16	88812906	88813156
chr16	5083764	5084014			chr16	88836976	88837226
chr16	5121718	5121968			chr16	88849019	88849269
chr16	5142292	5142542			chr16	89368065	89368315
chr16	5148038	5148288			chr16	89382434	89382684
chr16	5276582	5276832			chr16	89386671	89386921
chr16	5956027	5956277			chr16	89488961	89489211
chr16	6534852	6535102			chr1	87597507	87597757
chr16	6925358	6925608			chr16	89668868	89669118
chr16	8891516	8891766			chr1	87599817	87600067
chr16	8957696	8957946			chr16	89988250	89988500
chr16	8965090	8965340			chr17	117150	117400
chr16	8982173	8982423			chr17	151614	151864
chr16	8986163	8986413			chr17	438652	438902
chr16	8997453	8997703			chr1	87669817	87670067
chr1	77787898	77788148			chr17	984383	984633
chr16	9166745	9166995			chr17	1014467	1014717
chr16	9185221	9185471			chr17	1018467	1018717
chr16	9193328	9193578			chr1	87793995	87794245
chr16	9459225	9459475			chr17	2262879	2263129
chr16	10208308	10208558			chr17	2750932	2751182
chr16	10300157	10300407			chr17	2770802	2771052
chr16	10364058	10364308			chr17	2852972	2853222
chr16	10368564	10368814			chr17	3478835	3479085
chr16	10614400	10614650			chr17	3698362	3698612
chr16	10627582	10627832			chr17	3782678	3782928
chr16	10652991	10653241			chr1	88335348	88335598
chr16	10658602	10658852			chr17	3796309	3796559
chr1	77934262	77934512			chr1	88349576	88349826
chr16	10684244	10684494			chr17	4749620	4749870
chr16	10694799	10695049			chr1	88417571	88417821
chr16	10711102	10711352			chr17	4856676	4856926
chr16	10832711	10832961			chr1	88421788	88422038
chr16	10837883	10838133			chr17	5404303	5404553
chr16	10922853	10923103			chr17	5430146	5430396
chr16	11012628	11012878			chr17	5487742	5487992
chr1	78005523	78005773			chr17	6410934	6411184
chr16	11038214	11038464			chr17	6851984	6852234
chr16	11057980	11058230			chr17	7123062	7123312
chr16	11227267	11227517			chr1	88793382	88793632
chr16	11232646	11232896			chr1	88928620	88928870
chr16	11443632	11443882			chr17	7607058	7607308
chr16	11591363	11591613			chr17	7745930	7746180
chr16	11640416	11640666			chr17	7923086	7923336
chr16	11644782	11645032			chr17	8269548	8269798
chr16	11651740	11651990			chr17	9027734	9027984
chr16	11668483	11668733			chr17	9745500	9745750
chr16	11678010	11678260			chr17	9832248	9832498
chr16	11691140	11691390			chr17	9880650	9880900
chr16	11721863	11722113			chr17	10101960	10102210
chr16	11771458	11771708			chr17	10147532	10147782
chr16	11836640	11836890			chr17	10154606	10154856
chr16	11945302	11945552			chr17	10538445	10538695
chr16	11961306	11961556			chr17	11501592	11501842
chr16	12009840	12010090			chr17	12540346	12540596
chr16	12105384	12105634			chr17	12594529	12594779
chr16	12130982	12131232			chr17	13250786	13251036
chr16	12191452	12191702			chr17	13288868	13289118
chr16	12214428	12214678			chr17	13365678	13365928
chr16	12737849	12738099			chr17	13465480	13465730
chr16	12810569	12810819			chr1	89981662	89981912
chr16	12848002	12848252			chr17	15073030	15073280
chr16	12895426	12895676			chr1	89990290	89990540
chr16	12897552	12897802			chr17	15295791	15296041
chr16	13204347	13204597			chr1	90069328	90069578
chr16	14109922	14110172			chr17	16382073	16382323
chr16	14164905	14165155			chr17	16419950	16420200
chr1	78298756	78299006			chr17	16768481	16768731
chr16	14356963	14357213			chr17	16914061	16914311
chr16	14379623	14379873			chr17	17055313	17055563
chr16	14395972	14396222			chr1	90098489	90098739
chr16	14412194	14412444			chr1	90190271	90190521
chr16	14580760	14581010			chr17	18139082	18139332
chr16	14595462	14595712			chr17	18171742	18171992
chr16	14723991	14724241			chr1	90194461	90194711
chr16	14734735	14734985			chr17	18315407	18315657
chr16	14797117	14797367			chr1	90204516	90204766
chr16	14836209	14836459			chr17	18877825	18878075
chr16	15068738	15068988			chr17	18885320	18885570
chr16	15137353	15137603			chr1	90209086	90209336
chr1	78406871	78407121			chr17	19166531	19166781
chr16	15248553	15248803			chr17	19220644	19220894
chr16	15738170	15738420			chr17	19244336	19244586
chr16	15766673	15766923			chr17	19656378	19656628
chr16	16403798	16404048			chr17	19912509	19912759
chr16	17329289	17329539			chr17	19967316	19967566
chr16	17367000	17367250			chr1	90286412	90286662
chr16	17369646	17369896			chr17	20025263	20025513
chr16	17407156	17407406			chr17	21113057	21113307
chr16	17412113	17412363			chr1	90372245	90372495
chr16	17436910	17437160			chr17	21189715	21189965
chr16	17441571	17441821			chr17	21214469	21214719
chr16	17445310	17445560			chr17	21280188	21280438
chr16	17452750	17453000			chr17	22022551	22022801
chr16	17499312	17499562			chr17	26156363	26156613
chr16	17685195	17685445			chr17	26167309	26167559
chr16	18495976	18496226			chr17	26698430	26698680
chr16	18812895	18813145			chr17	26898447	26898697
chr16	18937845	18938095			chr17	26926529	26926779
chr16	18973344	18973594			chr17	27038307	27038557
chr16	19078740	19078990			chr17	27169625	27169875
chr1	78703366	78703616			chr17	27460187	27460437
chr16	19490676	19490926			chr17	27568007	27568257
chr1	78744796	78745046			chr17	27904858	27905108
chr1	7392232	7392482			chr17	27942577	27942827
chr16	19707704	19707954			chr1	91317095	91317345
chr16	20082097	20082347			chr17	27992258	27992508
chr16	20817673	20817923			chr17	28443702	28443952
chr1	78754655	78754905			chr17	28705744	28705994
chr16	21513519	21513769			chr17	29799240	29799490
chr16	21519976	21520226			chr17	29808758	29809008
chr16	21529081	21529331			chr17	29887132	29887382
chr16	21831581	21831831			chr17	29891934	29892184
chr16	22037864	22038114			chr1	91869961	91870211
chr16	22201847	22202097			chr17	29907750	29908000
chr16	22211003	22211253			chr17	29923710	29923960
chr1	78841800	78842050			chr17	30066312	30066562
chr16	22289904	22290154			chr17	30771669	30771919
chr16	22381446	22381696			chr17	30891300	30891550
chr16	22448737	22448987			chr1	92030402	92030652
chr16	22618076	22618326			chr17	32579648	32579898
chr16	22696810	22697060			chr17	33048434	33048684
chr16	22799590	22799840			chr17	33083746	33083996
chr16	22992779	22993029			chr1	92035425	92035675
chr16	23076027	23076277			chr17	33349781	33350031
chr16	23193747	23193997			chr17	33469192	33469442
chr16	23265822	23266072			chr1	92116410	92116660
chr16	23373935	23374185			chr17	34040287	34040537
chr16	23418172	23418422			chr17	34101658	34101908
chr16	23434856	23435106			chr17	34136279	34136529
chr16	23516051	23516301			chr17	34410120	34410370
chr16	23681540	23681790			chr17	35278932	35279182
chr16	24550705	24550955			chr1	92246966	92247216
chr16	24693352	24693602			chr17	37352140	37352390
chr16	24712376	24712626			chr17	37366044	37366294
chr16	24740826	24741076			chr17	38347954	38348204
chr16	24850222	24850472			chr1	92764371	92764621
chr16	24998220	24998470			chr1	8150359	8150609
chr16	25005603	25005853			chr17	38608592	38608842
chr16	25010761	25011011			chr17	38698940	38699190
chr16	25059943	25060193			chr17	39769143	39769393
chr16	25118371	25118621			chr17	39781928	39782178
chr16	25163385	25163635			chr17	39929542	39929792
chr16	25309894	25310144			chr1	93218192	93218442
chr16	26828334	26828584			chr17	40066998	40067248
chr1	79670744	79670994			chr1	93250605	93250855
chr16	27211128	27211378			chr17	40477163	40477413
chr16	27215018	27215268			chr17	40672142	40672392
chr16	27254527	27254777			chr1	93426806	93427056
chr16	27312719	27312969			chr1	93645905	93646155
chr16	27527801	27528051			chr17	41419119	41419369
chr16	27589980	27590230			chr17	41434454	41434704
chr16	27615892	27616142			chr1	93811254	93811504
chr1	81593112	81593362			chr17	41685768	41686018
chr1	948796	949046			chr1	93913501	93913751
chr16	28152487	28152737			chr17	42357131	42357381
chr16	28178172	28178422			chr17	42385807	42386057
chr16	28223268	28223518			chr17	42634458	42634708
chr16	28273274	28273524			chr17	42987117	42987367
chr16	28289182	28289432			chr17	43025102	43025352
chr16	28303665	28303915			chr17	43049556	43049806
chr16	28335934	28336184			chr1	94081464	94081714
chr16	28376025	28376275			chr17	43201427	43201677
chr16	28550294	28550544			chr17	43248247	43248497
chr16	28565424	28565674			chr17	43419042	43419292
chr16	28814042	28814292			chr17	43449097	43449347
chr16	28834193	28834443			chr17	43523352	43523602
chr16	28936484	28936734			chr1	94158876	94159126
chr16	28985929	28986179			chr17	43697538	43697788
chr16	29025252	29025502			chr17	44302614	44302864
chr16	29276727	29276977			chr1	94167273	94167523
chr16	29302316	29302566			chr1	94186567	94186817
chr16	29311506	29311756			chr17	45401103	45401353
chr16	29322247	29322497			chr17	45772002	45772252
chr1	82625678	82625928			chr17	45899030	45899280
chr16	29361400	29361650			chr1	94288344	94288594
chr16	29613138	29613388			chr17	46560837	46561087
chr16	29816751	29817001			chr17	46894438	46894688
chr16	29819100	29819350			chr17	47049802	47050052
chr16	29822577	29822827			chr1	94375040	94375290
chr16	29827267	29827517			chr17	48030560	48030810
chr16	29955415	29955665			chr17	48105013	48105263
chr16	29984956	29985206			chr17	48124946	48125196
chr16	30007364	30007614			chr1	94474814	94475064
chr16	30081388	30081638			chr17	48287765	48288015
chr16	30135701	30135951			chr17	48337040	48337290
chr16	30211008	30211258			chr17	48408870	48409120
chr16	30346099	30346349			chr1	94488147	94488397
chr16	30366596	30366846			chr17	48637859	48638109
chr16	30382098	30382348			chr17	48641860	48642110
chr16	30429145	30429395			chr17	48682878	48683128
chr16	30538619	30538869			chr17	48739220	48739470
chr16	30546153	30546403			chr1	94557843	94558093
chr16	30551143	30551393			chr1	94560817	94561067
chr16	30569730	30569980			chr17	49432712	49432962
chr16	30583215	30583465			chr1	94626408	94626658
chr16	30596944	30597194			chr17	49725313	49725563
chr16	30661890	30662140			chr17	51183479	51183729
chr16	30669432	30669682			chr17	51799859	51800109
chr1	83629686	83629936			chr1	94703079	94703329
chr16	30709376	30709626			chr17	53499250	53499500
chr16	30751762	30752012			chr17	53653546	53653796
chr16	30759485	30759735			chr1	94713155	94713405
chr16	30773402	30773652			chr17	53975635	53975885
chr16	30786681	30786931			chr1	94720078	94720328
chr16	30816857	30817107			chr1	94724421	94724671
chr16	30886577	30886827			chr1	94736360	94736610
chr16	30908029	30908279			chr17	55055305	55055555
chr16	30913450	30913700			chr17	55432455	55432705
chr16	30934011	30934261			chr1	94791219	94791469
chr16	30961474	30961724			chr17	55700492	55700742
chr16	30968843	30969093			chr17	55740422	55740672
chr16	31044538	31044788			chr17	55801422	55801672
chr1	83997785	83998035			chr17	55844037	55844287
chr16	31128783	31129033			chr17	55945818	55946068
chr16	31153634	31153884			chr1	95007339	95007589
chr16	31188446	31188696			chr17	55976398	55976648
chr16	31191308	31191558			chr17	55980550	55980800
chr16	31397552	31397802			chr1	95045497	95045747
chr16	31465235	31465485			chr17	56261798	56262048
chr16	31471033	31471283			chr17	56429546	56429796
chr16	33239738	33239988			chr17	56591886	56592136
chr16	33294138	33294388			chr1	95088391	95088641
chr16	33869740	33869990			chr1	95102266	95102516
chr16	33873886	33874136			chr1	95175496	95175746
chr16	33887530	33887780			chr1	95179372	95179622
chr16	33895774	33896024			chr17	59570487	59570737
chr16	33973628	33973878			chr17	59940828	59941078
chr16	33995496	33995746			chr17	60075123	60075373
chr16	34004674	34004924			chr17	60704568	60704818
chr16	34022605	34022855			chr17	60781222	60781472
chr16	34834146	34834396			chr17	60856506	60856756
chr16	35229126	35229376			chr17	62658354	62658604
chr16	35232403	35232653			chr17	62676013	62676263
chr16	35270537	35270787			chr17	62703379	62703629
chr16	46401739	46401989			chr17	62788946	62789196
chr16	46588411	46588661			chr17	62833188	62833438
chr16	46650980	46651230			chr17	63133334	63133584
chr16	47426056	47426306			chr17	63341450	63341700
chr16	47428268	47428518			chr17	63355180	63355430
chr16	48110724	48110974			chr17	63846682	63846932
chr16	48161016	48161266			chr17	64298519	64298769
chr16	48198901	48199151			chr17	64536242	64536492
chr16	48278067	48278317			chr17	65473905	65474155
chr16	48310058	48310308			chr17	65525176	65525426
chr16	48351498	48351748			chr17	65630034	65630284
chr16	48419307	48419557			chr17	65821405	65821655
chr16	48444282	48444532			chr1	95328301	95328551
chr16	48526142	48526392			chr17	66508422	66508672
chr16	48570367	48570617			chr17	67446994	67447244
chr16	48630183	48630433			chr17	67726148	67726398
chr16	49315793	49316043			chr17	67729895	67730145
chr16	49400095	49400345			chr17	68036562	68036812
chr16	49612502	49612752			chr17	68165449	68165699
chr16	49614077	49614327			chr17	69068054	69068304
chr16	49654352	49654602			chr1	95341954	95342204
chr16	49673809	49674059			chr17	69962635	69962885
chr16	49751638	49751888			chr17	69966484	69966734
chr16	49862104	49862354			chr17	70367068	70367318
chr16	50100122	50100372			chr17	70370332	70370582
chr16	50650962	50651212			chr17	70417432	70417682
chr16	50708799	50709049			chr1	95378446	95378696
chr16	50730632	50730882			chr17	70687686	70687936
chr16	50775691	50775941			chr1	95392606	95392856
chr16	51068368	51068618			chr1	95440358	95440608
chr16	51095403	51095653			chr17	72038913	72039163
chr16	51186204	51186454			chr17	72264750	72265000
chr16	51198096	51198346			chr1	95488958	95489208
chr16	51427351	51427601			chr17	72443038	72443288
chr16	51465470	51465720			chr17	72726903	72727153
chr16	51498978	51499228			chr1	95550008	95550258
chr16	53088772	53089022			chr17	73246161	73246411
chr16	53133623	53133873			chr17	73285476	73285726
chr16	53242172	53242422			chr1	95552832	95553082
chr16	53491670	53491920			chr1	95582810	95583060
chr16	53545248	53545498			chr1	95699547	95699797
chr16	53698993	53699243			chr17	74137320	74137570
chr16	53712950	53713200			chr17	74236494	74236744
chr16	53802577	53802827			chr17	74489230	74489480
chr16	53810100	53810350			chr17	74523799	74524049
chr16	54114637	54114887			chr17	74768940	74769190
chr16	54227925	54228175			chr17	75312268	75312518
chr16	54300391	54300641			chr17	75388121	75388371
chr16	54320646	54320896			chr17	75405823	75406073
chr16	54480574	54480824			chr17	75419874	75420124
chr16	54494540	54494790			chr17	75422501	75422751
chr16	54855752	54856002			chr17	75734936	75735186
chr16	54980672	54980922			chr17	75792608	75792858
chr16	55017099	55017349			chr17	76250500	76250750
chr16	55034593	55034843			chr17	76320678	76320928
chr16	55125306	55125556			chr17	76325546	76325796
chr16	55150604	55150854			chr17	76333582	76333832
chr16	55152701	55152951			chr1	97025716	97025966
chr16	55536825	55537075			chr1	97187108	97187358
chr16	55787095	55787345			chr17	77841116	77841366
chr16	56581144	56581394			chr17	78735272	78735522
chr16	56691572	56691822			chr17	78865333	78865583
chr16	56713837	56714087			chr17	78894274	78894524
chr16	57095309	57095559			chr17	78994744	78994994
chr16	57146351	57146601			chr17	79068774	79069024
chr1	7681806	7682056			chr17	79303369	79303619
chr16	57219967	57220217			chr17	79361088	79361338
chr16	57225117	57225367			chr17	79386502	79386752
chr16	57227017	57227267			chr17	79391233	79391483
chr16	57278870	57279120			chr17	79394988	79395238
chr16	57334393	57334643			chr17	79549446	79549696
chr1	85313021	85313271			chr17	79633590	79633840
chr16	57765871	57766121			chr1	97609090	97609340
chr16	57831826	57832076			chr17	79895130	79895380
chr1	85339340	85339590			chr1	98386457	98386707
chr1	85360226	85360476			chr17	80199533	80199783
chr16	58443310	58443560			chr1	98403528	98403778
chr16	58575488	58575738			chr17	80446978	80447228
chr16	58685862	58686112			chr17	80540086	80540336
chr16	58754777	58755027			chr1	98496154	98496404
chr16	58848551	58848801			chr17	80762789	80763039
chr16	58854296	58854546			chr17	80773492	80773742
chr16	58884252	58884502			chr17	80805941	80806191
chr16	59213690	59213940			chr17	80858748	80858998
chr16	59293068	59293318			chr1	98510890	98511140
chr16	59504654	59504904			chr1	98519700	98519950
chr16	61963712	61963962			chr17	81150960	81151210
chr16	62042932	62043182			chr1	98576377	98576627
chr16	62839314	62839564			chr18	500602	500852
chr16	64324366	64324616			chr18	525069	525319
chr16	64847922	64848172			chr18	658161	658411
chr16	64926808	64927058			chr18	2302968	2303218
chr16	65030732	65030982			chr18	2410750	2411000
chr16	65448266	65448516			chr18	2516266	2516516
chr16	66037072	66037322			chr1	98796810	98797060
chr16	66070718	66070968			chr18	2898116	2898366
chr16	66165169	66165419			chr18	3008603	3008853
chr16	66186702	66186952			chr18	3015250	3015500
chr16	66233207	66233457			chr18	3305366	3305616
chr16	66281644	66281894			chr18	3449569	3449819
chr16	66550746	66550996			chr18	3459567	3459817
chr16	66586318	66586568			chr18	4807676	4807926
chr16	66775514	66775764			chr18	5510156	5510406
chr1	85594095	85594345			chr18	5582973	5583223
chr16	66912068	66912318			chr18	5629886	5630136
chr16	67047960	67048210			chr18	5890629	5890879
chr16	67062794	67063044			chr1	100046137	100046387
chr16	67089674	67089924			chr18	6328696	6328946
chr1	85600862	85601112			chr18	7273640	7273890
chr16	67193701	67193951			chr1	100056391	100056641
chr16	67260838	67261088			chr18	7945965	7946215
chr16	67515018	67515268			chr18	8948610	8948860
chr16	67555405	67555655			chr18	9017100	9017350
chr16	67595990	67596240			chr1	100113723	100113973
chr16	67701839	67702089			chr18	9022845	9023095
chr16	67753192	67753442			chr18	9771548	9771798
chr16	67875817	67876067			chr18	10563950	10564200
chr16	67880548	67880798			chr18	11149458	11149708
chr16	67891775	67892025			chr1	100503497	100503747
chr16	67977836	67978086			chr18	12255673	12255923
chr16	68057012	68057262			chr18	12279180	12279430
chr16	68271495	68271745			chr18	12308617	12308867
chr16	68292147	68292397			chr1	100715308	100715558
chr16	68432716	68432966			chr18	13243038	13243288
chr16	68436230	68436480			chr1	100731597	100731847
chr16	68440956	68441206			chr18	13284660	13284910
chr16	68482396	68482646			chr18	13318659	13318909
chr16	68670080	68670330			chr18	13382308	13382558
chr16	68790187	68790437			chr18	13447760	13448010
chr16	69091601	69091851			chr18	13452485	13452735
chr16	69223088	69223338			chr1	100817826	100818076
chr16	69373404	69373654			chr18	13571109	13571359
chr16	69555131	69555381			chr18	13801092	13801342
chr16	69599649	69599899			chr18	19320501	19320751
chr16	69788758	69789008			chr18	20015218	20015468
chr16	69796112	69796362			chr18	20131850	20132100
chr16	69833554	69833804			chr18	20136558	20136808
chr16	69848508	69848758			chr18	20254340	20254590
chr16	69855139	69855389			chr18	20263247	20263497
chr16	69922128	69922378			chr18	20274999	20275249
chr16	69928691	69928941			chr18	20513183	20513433
chr1	7831325	7831575			chr18	20864596	20864846
chr16	70099729	70099979			chr18	20887554	20887804
chr16	70170532	70170782			chr18	21166367	21166617
chr16	70182182	70182432			chr1	101092909	101093159
chr16	70415265	70415515			chr18	21408480	21408730
chr16	70715470	70715720			chr18	21562426	21562676
chr16	70725839	70726089			chr18	21594496	21594746
chr16	70759411	70759661			chr18	22655860	22656110
chr16	70771504	70771754			chr1	101418640	101418890
chr16	70834956	70835206			chr18	23806221	23806471
chr16	71323213	71323463			chr18	24236974	24237224
chr16	71460462	71460712			chr18	25236425	25236675
chr16	71924548	71924798			chr1	101491442	101491692
chr16	72047280	72047530			chr18	25695138	25695388
chr16	72050967	72051217			chr18	26744045	26744295
chr16	72351337	72351587			chr18	28066563	28066813
chr16	72508470	72508720			chr18	28786811	28787061
chr16	72661162	72661412			chr18	29034122	29034372
chr16	72882824	72883074			chr18	29067685	29067935
chr16	72911368	72911618			chr18	29078017	29078267
chr16	72961662	72961912			chr18	29090315	29090565
chr16	73071274	73071524			chr18	29092507	29092757
chr16	73089959	73090209			chr18	30209934	30210184
chr16	73116543	73116793			chr18	30490719	30490969
chr16	73156682	73156932			chr18	31176522	31176772
chr16	73423008	73423258			chr18	32347606	32347856
chr16	73581560	73581810			chr18	32621205	32621455
chr16	73802680	73802930			chr18	32697906	32698156
chr16	73951114	73951364			chr18	32758278	32758528
chr16	74366474	74366724			chr18	32820821	32821071
chr16	74535628	74535878			chr1	101832118	101832368
chr16	74970846	74971096			chr18	33058607	33058857
chr16	75032704	75032954			chr18	33196853	33197103
chr16	75079066	75079316			chr18	33199498	33199748
chr16	75282049	75282299			chr18	33767318	33767568
chr16	75290111	75290361			chr18	33877519	33877769
chr1	7844035	7844285			chr18	34408923	34409173
chr16	75339414	75339664			chr18	34974061	34974311
chr1	86000288	86000538			chr18	35061545	35061795
chr16	75681559	75681809			chr18	35219896	35220146
chr16	77071905	77072155			chr18	36275927	36276177
chr1	86010384	86010634			chr18	37418896	37419146
chr16	77393008	77393258			chr18	37420481	37420731
chr16	77448778	77449028			chr18	39625382	39625632
chr16	77613400	77613650			chr18	40286646	40286896
chr16	78139346	78139596			chr18	42101065	42101315
chr1	86016673	86016923			chr18	42117608	42117858
chr16	78426677	78426927			chr18	42217485	42217735
chr16	78495436	78495686			chr18	42313431	42313681
chr16	78709344	78709594			chr18	42504930	42505180
chr16	78850751	78851001			chr18	42593990	42594240
chr16	79209596	79209846			chr18	42915580	42915830
chr16	79216646	79216896			chr18	43197364	43197614
chr16	79252868	79253118			chr18	43534397	43534647
chr16	79749020	79749270			chr18	43678061	43678311
chr16	79751556	79751806			chr1	103827590	103827840
chr16	80044180	80044430			chr18	44526580	44526830
chr16	80208374	80208624			chr18	44689688	44689938
chr16	80265805	80266055			chr18	45599281	45599531
chr16	80308496	80308746			chr18	45753618	45753868
chr16	80380283	80380533			chr18	45800772	45801022
chr16	80574747	80574997			chr18	45929406	45929656
chr1	86048094	86048344			chr1	103967302	103967552
chr16	81170305	81170555			chr18	45936700	45936950
chr16	81327915	81328165			chr18	46378672	46378922
chr16	81343815	81344065			chr18	46428381	46428631
chr16	81478357	81478607			chr18	46455226	46455476
chr16	81586840	81587090			chr18	46465912	46466162
chr16	81599696	81599946			chr18	46469026	46469276
chr16	81602034	81602284			chr18	46524493	46524743
chr16	81616758	81617008			chr18	46775904	46776154
chr16	81629273	81629523			chr18	47088189	47088439
chr16	81642476	81642726			chr18	47252602	47252852
chr16	81658888	81659138			chr18	47347098	47347348
chr16	81683512	81683762			chr1	107163294	107163544
chr16	81714089	81714339			chr18	47689494	47689744
chr16	81801767	81802017			chr18	47834523	47834773
chr1	86072786	86073036			chr18	48086280	48086530
chr16	81922333	81922583			chr18	48158780	48159030
chr16	82097378	82097628			chr18	48405334	48405584
chr16	82106021	82106271			chr18	48494215	48494465
chr16	82504256	82504506			chr18	49141645	49141895
chr16	82926018	82926268			chr18	51795772	51796022
chr1	86077651	86077901			chr18	51884175	51884425
chr16	83961979	83962229			chr18	52443537	52443787
chr16	84195870	84196120			chr18	52495477	52495727
chr16	84210728	84210978			chr18	53447724	53447974
chr16	84220573	84220823			chr18	53537222	53537472
chr16	84390948	84391198			chr18	53900956	53901206
chr16	84733435	84733685			chr18	53924516	53924766
chr1	86119868	86120118			chr18	54019404	54019654
chr16	85034529	85034779			chr18	54110781	54111031
chr16	85044954	85045204			chr18	54671984	54672234
chr1	86121976	86122226			chr18	54877574	54877824
chr16	85171122	85171372			chr18	55102416	55102666
chr16	85254016	85254266			chr18	55200305	55200555
chr16	85261783	85262033			chr18	55288912	55289162
chr16	85265635	85265885			chr18	55361186	55361436
chr16	85269323	85269573			chr18	55710840	55711090
chr16	85343496	85343746			chr18	55936170	55936420
chr16	85355505	85355755			chr18	56165197	56165447
chr16	85388477	85388727			chr18	56209033	56209283
chr16	85404623	85404873			chr18	56234750	56235000
chr16	85410053	85410303			chr18	56239538	56239788
chr16	85429134	85429384			chr18	56644558	56644808
chr16	85494646	85494896			chr18	56665668	56665918
chr16	85548624	85548874			chr18	56790993	56791243
chr16	85558470	85558720			chr18	57383234	57383484
chr16	85645781	85646031			chr18	57567033	57567283
chr16	85753890	85754140			chr18	59369298	59369548
chr16	85833112	85833362			chr1	109102494	109102744
chr16	86256654	86256904			chr18	59949022	59949272
chr16	86597489	86597739			chr18	60051902	60052152
chr16	86725721	86725971			chr1	109133606	109133856
chr16	86784883	86785133			chr18	60382326	60382576
chr16	86866928	86867178			chr18	60549007	60549257
chr16	86976107	86976357			chr18	60935346	60935596
chr16	87194578	87194828			chr18	61034734	61034984
chr16	87417450	87417700			chr18	61455754	61456004
chr16	87425666	87425916			chr1	109203627	109203877
chr16	87471806	87472056			chr18	65009342	65009592
chr16	87498354	87498604			chr18	65027471	65027721
chr16	87605074	87605324			chr18	65267412	65267662
chr16	87774094	87774344			chr1	109234779	109235029
chr1	86967829	86968079			chr1	109247182	109247432
chr1	8065199	8065449			chr18	67956119	67956369
chr16	87824972	87825222			chr18	68001131	68001381
chr16	87889796	87890046			chr18	68051588	68051838
chr16	87905165	87905415			chr18	68089380	68089630
chr16	87984883	87985133			chr1	109262574	109262824
chr16	88050629	88050879			chr18	71815524	71815774
chr16	88272467	88272717			chr18	71959175	71959425
chr1	87199228	87199478			chr18	72642662	72642912
chr16	88365812	88366062			chr18	72672429	72672679
chr16	88454750	88455000			chr18	72782754	72783004
chr16	88636646	88636896			chr1	999630	999880
chr16	88686417	88686667			chr18	72839774	72840024
chr1	87254104	87254354			chr18	73120879	73121129
chr16	88717848	88718098			chr18	73350314	73350564
chr16	88869964	88870214			chr18	74063989	74064239
chr16	88923312	88923562			chr18	74171861	74172111
chr16	89258850	89259100			chr18	74323162	74323412
chr16	89545301	89545551			chr18	74452334	74452584
chr16	89724035	89724285			chr18	74779568	74779818
chr16	89894854	89895104			chr18	74813365	74813615
chr16	89904236	89904486			chr18	74844640	74844890
chr16	89939867	89940117			chr18	74858546	74858796
chr16	89984290	89984540			chr18	77139026	77139276
chr16	90039036	90039286			chr18	77153778	77154028
chr16	90061311	90061561			chr1	109505938	109506188
chr16	90087129	90087379			chr18	77394642	77394892
chr16	90110528	90110778			chr18	77748501	77748751
chr16	90172870	90173120			chr19	70834	71084
chr1	87620044	87620294			chr1	109642645	109642895
chr17	214876	215126			chr1	109656550	109656800
chr17	259917	260167			chr19	1177783	1178033
chr17	453290	453540			chr1	109733127	109733377
chr17	629474	629724			chr1	109740022	109740272
chr1	87744948	87745198			chr1	109743916	109744166
chr17	1106638	1106888			chr19	2469454	2469704
chr17	1359538	1359788			chr1	109792056	109792306
chr17	1532087	1532337			chr1	109806227	109806477
chr17	1619637	1619887			chr19	2620882	2621132
chr17	1884869	1885119			chr19	3375486	3375736
chr17	1933288	1933538			chr1	109817484	109817734
chr17	2239695	2239945			chr19	3655817	3656067
chr17	2296053	2296303			chr19	4058006	4058256
chr17	2300136	2300386			chr19	4374637	4374887
chr17	2302880	2303130			chr19	4988926	4989176
chr1	88060600	88060850			chr19	5148380	5148630
chr17	2615036	2615286			chr1	109940558	109940808
chr17	3377618	3377868			chr19	6611110	6611360
chr1	88206820	88207070			chr1	110036535	110036785
chr17	3434942	3435192			chr19	7982344	7982594
chr17	3571812	3572062			chr1	110091094	110091344
chr17	3626975	3627225			chr19	8420524	8420774
chr17	3976137	3976387			chr19	8427060	8427310
chr17	4039672	4039922			chr1	110163532	110163782
chr17	4046249	4046499			chr1	110210490	110210740
chr17	4064603	4064853			chr19	9995898	9996148
chr17	4607402	4607652			chr1	110230252	110230502
chr17	4693587	4693837			chr1	110282812	110283062
chr17	4736449	4736699			chr19	10923796	10924046
chr17	4823707	4823957			chr19	11279268	11279518
chr17	4843387	4843637			chr19	13063760	13064010
chr17	4870637	4870887			chr19	13129404	13129654
chr17	4929320	4929570			chr19	13202376	13202626
chr17	5015100	5015350			chr19	13278450	13278700
chr17	5185407	5185657			chr19	13898682	13898932
chr17	5342446	5342696			chr19	13907636	13907886
chr17	5372164	5372414			chr19	13941818	13942068
chr17	5389690	5389940			chr19	13957386	13957636
chr17	5679467	5679717			chr19	13962027	13962277
chr17	6494943	6495193			chr19	14049189	14049439
chr17	6546848	6547098			chr19	14089218	14089468
chr17	6580833	6581083			chr19	14097195	14097445
chr17	6915863	6916113			chr19	14545940	14546190
chr17	6939081	6939331			chr1	110577167	110577417
chr17	7137797	7138047			chr19	15305799	15306049
chr17	7142893	7143143			chr1	110752686	110752936
chr17	7145655	7145905			chr19	15890740	15890990
chr17	7155320	7155570			chr19	16181340	16181590
chr17	7184777	7185027			chr19	16449746	16449996
chr17	7210468	7210718			chr19	17218812	17219062
chr17	7232680	7232930			chr19	18415378	18415628
chr17	7255095	7255345			chr19	18527684	18527934
chr17	7387538	7387788			chr19	18761329	18761579
chr17	7475873	7476123			chr19	18771270	18771520
chr17	7486969	7487219			chr19	18874903	18875153
chr17	7518362	7518612			chr19	18904360	18904610
chr17	7591523	7591773			chr19	18906448	18906698
chr17	7760797	7761047			chr19	18918855	18919105
chr17	7790986	7791236			chr19	19648916	19649166
chr17	8023494	8023744			chr19	19652495	19652745
chr17	8055707	8055957			chr19	19661347	19661597
chr17	8059779	8060029			chr1	111735462	111735712
chr17	8076677	8076927			chr1	111771091	111771341
chr17	8126111	8126361			chr19	21688583	21688833
chr17	8129907	8130157			chr19	22034733	22034983
chr17	8151311	8151561			chr1	111931585	111931835
chr17	8286514	8286764			chr19	28960040	28960290
chr17	8446598	8446848			chr19	30153554	30153804
chr17	8670119	8670369			chr19	30156183	30156433
chr17	8762513	8762763			chr1	112113419	112113669
chr17	9249698	9249948			chr1	8960033	8960283
chr17	9253333	9253583			chr19	33555736	33555986
chr17	9663698	9663948			chr1	112276088	112276338
chr17	10027219	10027469			chr19	33675030	33675280
chr17	10187788	10188038			chr1	112281978	112282228
chr17	12530587	12530837			chr19	34810774	34811024
chr17	12892431	12892681			chr19	34818804	34819054
chr17	13018011	13018261			chr19	34992493	34992743
chr17	13324300	13324550			chr19	35579490	35579740
chr17	13333531	13333781			chr19	35645899	35646149
chr17	13341707	13341957			chr19	36138960	36139210
chr1	8119381	8119631			chr19	36427115	36427365
chr17	13505164	13505414			chr1	112933474	112933724
chr17	13956433	13956683			chr1	112938668	112938918
chr17	14368568	14368818			chr19	38490195	38490445
chr17	14374426	14374676			chr19	38530808	38531058
chr17	14641591	14641841			chr19	38640383	38640633
chr17	14823014	14823264			chr19	38663980	38664230
chr17	15176468	15176718			chr19	38704728	38704978
chr17	15182449	15182699			chr1	113044509	113044759
chr17	15313105	15313355			chr19	38852465	38852715
chr17	15546162	15546412			chr19	38878518	38878768
chr1	90056421	90056671			chr1	113086716	113086966
chr17	15944172	15944422			chr1	113162243	113162493
chr17	16011796	16012046			chr19	40502765	40503015
chr17	16118780	16119030			chr19	40697207	40697457
chr17	16342026	16342276			chr1	113247415	113247665
chr17	16368042	16368292			chr1	113249829	113250079
chr17	16438987	16439237			chr19	41281242	41281492
chr17	16556968	16557218			chr19	41729510	41729760
chr17	16882636	16882886			chr19	41731544	41731794
chr17	16931504	16931754			chr1	113364026	113364276
chr17	16939765	16940015			chr19	42440486	42440736
chr17	16948491	16948741			chr19	42617788	42618038
chr17	16977618	16977868			chr19	42959877	42960127
chr17	17094644	17094894			chr1	113932756	113933006
chr17	17273454	17273704			chr1	114302007	114302257
chr17	17319852	17320102			chr19	45908967	45909217
chr17	17349384	17349634			chr19	45927515	45927765
chr1	90123498	90123748			chr19	45932024	45932274
chr17	17715123	17715373			chr1	114414259	114414509
chr1	90158203	90158453			chr1	114472059	114472309
chr17	17727009	17727259			chr19	46583874	46584124
chr17	17743441	17743691			chr19	46877190	46877440
chr17	17752484	17752734			chr19	46981824	46982074
chr17	17824599	17824849			chr19	47128544	47128794
chr17	17839173	17839423			chr1	114575568	114575818
chr17	17875852	17876102			chr19	47792688	47792938
chr17	17886760	17887010			chr19	48222304	48222554
chr17	17942490	17942740			chr1	114889164	114889414
chr17	18086594	18086844			chr19	48232791	48233041
chr17	18128655	18128905			chr19	48828562	48828812
chr17	18218343	18218593			chr1	115053718	115053968
chr1	8121376	8121626			chr19	49149670	49149920
chr17	18362424	18362674			chr1	115091813	115092063
chr17	18377295	18377545			chr19	49646170	49646420
chr17	18385132	18385382			chr1	115153287	115153537
chr17	18516384	18516634			chr1	115212653	115212903
chr17	18625261	18625511			chr19	50353816	50354066
chr17	18824362	18824612			chr1	9354547	9354797
chr17	18914396	18914646			chr19	51231681	51231931
chr17	18967033	18967283			chr19	51597265	51597515
chr17	18973697	18973947			chr1	115610183	115610433
chr17	19015612	19015862			chr1	115632483	115632733
chr17	19091454	19091704			chr19	53193742	53193992
chr17	19140553	19140803			chr1	115642378	115642628
chr17	19281471	19281721			chr1	115671778	115672028
chr17	19288211	19288461			chr1	115677755	115678005
chr17	19770274	19770524			chr19	55881760	55882010
chr17	20204093	20204343			chr19	55884062	55884312
chr17	20224121	20224371			chr19	55998982	55999232
chr17	20373454	20373704			chr19	56058708	56058958
chr17	20388377	20388627			chr1	115732766	115733016
chr17	20691074	20691324			chr1	115866252	115866502
chr17	20747171	20747421			chr1	115873235	115873485
chr17	20771647	20771897			chr1	115880696	115880946
chr17	20811864	20812114			chr1	115968991	115969241
chr17	20904738	20904988			chr1	115997912	115998162
chr17	20932454	20932704			chr1	116069820	116070070
chr17	20937684	20937934			chr19	58962807	58963057
chr17	20940585	20940835			chr1	116088772	116089022
chr17	20946508	20946758			chr2	68664	68914
chr17	21157492	21157742			chr2	317701	317951
chr17	21160362	21160612			chr2	568198	568448
chr1	90376453	90376703			chr2	877032	877282
chr17	21316375	21316625			chr2	1050962	1051212
chr17	21363718	21363968			chr2	1158550	1158800
chr17	21414938	21415188			chr2	1165982	1166232
chr17	21454711	21454961			chr2	1459338	1459588
chr17	21904769	21905019			chr2	1560597	1560847
chr1	90408674	90408924			chr2	1565805	1566055
chr17	25265151	25265401			chr2	1576494	1576744
chr17	25563722	25563972			chr2	1656913	1657163
chr17	25574538	25574788			chr2	1873782	1874032
chr17	25583432	25583682			chr2	1980581	1980831
chr17	25620963	25621213			chr2	1997560	1997810
chr17	25659846	25660096			chr2	2645926	2646176
chr17	25676125	25676375			chr2	2669116	2669366
chr1	90422730	90422980			chr2	2746936	2747186
chr17	25780545	25780795			chr2	3172317	3172567
chr17	25856340	25856590			chr2	3583654	3583904
chr17	25857929	25858179			chr2	4549890	4550140
chr17	25867437	25867687			chr2	4603778	4604028
chr17	25879258	25879508			chr2	4647772	4648022
chr17	25936787	25937037			chr2	4740920	4741170
chr17	25939187	25939437			chr2	5832293	5832543
chr1	90456545	90456795			chr2	5943786	5944036
chr1	8131014	8131264			chr2	6055494	6055744
chr17	26127542	26127792			chr2	6121830	6122080
chr17	26220218	26220468			chr2	6213965	6214215
chr17	26384922	26385172			chr2	6218791	6219041
chr17	26903821	26904071			chr2	6430609	6430859
chr1	90836368	90836618			chr2	7069428	7069678
chr17	27046535	27046785			chr2	7679925	7680175
chr17	27053840	27054090			chr2	8683776	8684026
chr17	27070909	27071159			chr2	9144013	9144263
chr17	27077176	27077426			chr2	9211243	9211493
chr17	27253040	27253290			chr2	9252253	9252503
chr17	27278601	27278851			chr2	9282909	9283159
chr1	91172579	91172829			chr2	9315274	9315524
chr17	27895502	27895752			chr2	9319213	9319463
chr17	27944986	27945236			chr2	9331244	9331494
chr17	27972774	27973024			chr2	9333786	9334036
chr17	28257155	28257405			chr2	9346725	9346975
chr17	28440292	28440542			chr2	9375185	9375435
chr17	28690791	28691041			chr2	9389583	9389833
chr17	29058520	29058770			chr2	9451598	9451848
chr17	29297901	29298151			chr2	9556067	9556317
chr17	29379285	29379535			chr2	9699134	9699384
chr17	29421782	29422032			chr2	9806026	9806276
chr17	29741015	29741265			chr2	9833352	9833602
chr1	91852803	91853053			chr2	9892808	9893058
chr17	29814819	29815069			chr2	10113383	10113633
chr17	29827163	29827413			chr2	10176372	10176622
chr17	29876921	29877171			chr2	10220238	10220488
chr17	30130868	30131118			chr2	10264904	10265154
chr17	30205489	30205739			chr2	10357012	10357262
chr17	30263798	30264048			chr2	10418555	10418805
chr17	30334292	30334542			chr2	10423434	10423684
chr17	30450918	30451168			chr2	10545569	10545819
chr17	30677000	30677250			chr2	10548495	10548745
chr17	31149616	31149866			chr2	10633835	10634085
chr17	31204125	31204375			chr2	10952854	10953104
chr17	31339734	31339984			chr2	11087134	11087384
chr17	32198689	32198939			chr2	11343743	11343993
chr17	32695825	32696075			chr2	11543954	11544204
chr17	33390611	33390861			chr2	11547277	11547527
chr17	33760610	33760860			chr2	11605942	11606192
chr17	34131763	34132013			chr2	11724356	11724606
chr17	34476724	34476974			chr2	11886583	11886833
chr17	34948141	34948391			chr2	11970082	11970332
chr17	35630433	35630683			chr2	12003877	12004127
chr1	92215918	92216168			chr2	12192052	12192302
chr17	35838267	35838517			chr2	12197628	12197878
chr17	35843442	35843692			chr2	12199844	12200094
chr17	35849689	35849939			chr2	12246478	12246728
chr17	35853460	35853710			chr2	12309889	12310139
chr17	35969425	35969675			chr2	12458279	12458529
chr17	36003434	36003684			chr2	12461580	12461830
chr17	36356664	36356914			chr1	117113548	117113798
chr17	36388950	36389200			chr2	12842758	12843008
chr17	36413007	36413257			chr2	12856808	12857058
chr17	36452870	36453120			chr2	12899455	12899705
chr1	92270127	92270377			chr2	13010902	13011152
chr17	36956123	36956373			chr1	117117314	117117564
chr17	36981521	36981771			chr2	15081211	15081461
chr17	37009924	37010174			chr2	15438999	15439249
chr17	37309967	37310217			chr1	117165304	117165554
chr1	92310728	92310978			chr1	9410356	9410606
chr17	37356337	37356587			chr2	15701329	15701579
chr17	37617557	37617807			chr2	15731832	15732082
chr17	37844089	37844339			chr2	15922164	15922414
chr17	37859630	37859880			chr2	16750422	16750672
chr17	37886703	37886953			chr2	16847044	16847294
chr17	38136761	38137011			chr2	16897328	16897578
chr17	38228418	38228668			chr2	16938670	16938920
chr17	38255352	38255602			chr1	117210295	117210545
chr17	38278070	38278320			chr2	17797231	17797481
chr17	38296783	38297033			chr2	17824438	17824688
chr17	38375416	38375666			chr2	17826694	17826944
chr17	38446938	38447188			chr2	17935124	17935374
chr17	38488258	38488508			chr2	18059727	18059977
chr17	38579568	38579818			chr2	18093604	18093854
chr17	39844873	39845123			chr2	18116056	18116306
chr17	39943014	39943264			chr1	117237158	117237408
chr17	39957824	39958074			chr2	18595072	18595322
chr17	40171924	40172174			chr2	18654750	18655000
chr17	40190679	40190929			chr2	18701794	18702044
chr17	40418926	40419176			chr2	18733624	18733874
chr17	40501650	40501900			chr2	18741838	18742088
chr17	40540550	40540800			chr2	18821036	18821286
chr17	40561646	40561896			chr2	19015590	19015840
chr17	40625183	40625433			chr2	19547686	19547936
chr17	40718929	40719179			chr2	19550219	19550469
chr17	40761422	40761672			chr2	19902161	19902411
chr17	40819587	40819837			chr2	20001220	20001470
chr17	40829092	40829342			chr2	20262475	20262725
chr17	40927857	40928107			chr2	20288432	20288682
chr17	40932387	40932637			chr2	20291470	20291720
chr17	40957082	40957332			chr2	20297932	20298182
chr17	40997964	40998214			chr2	20330724	20330974
chr17	41081181	41081431			chr1	117314966	117315216
chr17	41098080	41098330			chr2	20341260	20341510
chr17	41116365	41116615			chr2	20366424	20366674
chr17	41150199	41150449			chr2	20385476	20385726
chr17	41277397	41277647			chr2	20409228	20409478
chr17	41304090	41304340			chr2	20424456	20424706
chr17	41381969	41382219			chr1	117390270	117390520
chr17	41392714	41392964			chr2	20688019	20688269
chr17	41400913	41401163			chr2	20695999	20696249
chr17	41438350	41438600			chr2	20709837	20710087
chr17	41445638	41445888			chr2	20714652	20714902
chr17	41478692	41478942			chr2	20739494	20739744
chr17	41561125	41561375			chr2	20763694	20763944
chr17	42088628	42088878			chr2	20768276	20768526
chr17	42120750	42121000			chr2	20793236	20793486
chr17	42147923	42148173			chr2	20795723	20795973
chr17	42164349	42164599			chr2	20811129	20811379
chr17	42186139	42186389			chr2	20817758	20818008
chr17	42201185	42201435			chr2	20833718	20833968
chr17	42264118	42264368			chr2	20841301	20841551
chr17	42277524	42277774			chr2	20850740	20850990
chr1	94050730	94050980			chr2	20866608	20866858
chr17	42280202	42280452			chr2	20874846	20875096
chr17	42298540	42298790			chr2	22722832	22723082
chr17	42580783	42581033			chr2	23358678	23358928
chr17	42976680	42976930			chr1	117602644	117602894
chr17	43120654	43120904			chr1	9431742	9431992
chr17	43170387	43170637			chr2	23607879	23608129
chr17	43225641	43225891			chr2	23634678	23634928
chr17	43238935	43239185			chr2	23649441	23649691
chr1	94146368	94146618			chr2	23653186	23653436
chr17	43394486	43394736			chr2	23680014	23680264
chr17	43398290	43398540			chr2	23719967	23720217
chr17	43407154	43407404			chr2	23742201	23742451
chr17	43503078	43503328			chr2	23747194	23747444
chr17	43752460	43752710			chr2	23768418	23768668
chr17	43945767	43946017			chr1	117619965	117620215
chr17	44835225	44835475			chr2	23773064	23773314
chr17	45266608	45266858			chr2	23811732	23811982
chr17	45282162	45282412			chr2	23825060	23825310
chr17	45356551	45356801			chr2	23840372	23840622
chr17	45372886	45373136			chr1	117635785	117636035
chr17	45382810	45383060			chr2	24123412	24123662
chr17	45569855	45570105			chr2	24149903	24150153
chr17	45726978	45727228			chr2	24270224	24270474
chr17	45887643	45887893			chr2	24307522	24307772
chr17	45908826	45909076			chr2	24346137	24346387
chr17	45918572	45918822			chr1	117664350	117664600
chr17	46018741	46018991			chr2	24583271	24583521
chr17	46043538	46043788			chr2	24587907	24588157
chr17	46102479	46102729			chr2	25109798	25110048
chr17	46131657	46131907			chr2	25143044	25143294
chr17	46178658	46178908			chr2	25264890	25265140
chr17	46583213	46583463			chr2	25452188	25452438
chr17	46969805	46970055			chr2	25547946	25548196
chr17	47091836	47092086			chr2	25564764	25565014
chr17	47094207	47094457			chr2	25584884	25585134
chr17	47326879	47327129			chr2	25599801	25600051
chr1	8177073	8177323			chr2	25896594	25896844
chr17	47345717	47345967			chr2	26205325	26205575
chr17	47439564	47439814			chr2	26407585	26407835
chr17	47467076	47467326			chr2	26568769	26569019
chr17	47592698	47592948			chr2	26624567	26624817
chr17	47723589	47723839			chr2	26661414	26661664
chr17	47755304	47755554			chr2	26753627	26753877
chr17	47785506	47785756			chr2	26853881	26854131
chr1	94430278	94430528			chr2	26919280	26919530
chr17	47841525	47841775			chr2	27135016	27135266
chr17	47857314	47857564			chr2	27193208	27193458
chr17	47866396	47866646			chr2	27294460	27294710
chr17	47890880	47891130			chr2	27301306	27301556
chr17	47939069	47939319			chr2	27309313	27309563
chr17	48045962	48046212			chr1	117909904	117910154
chr17	48072382	48072632			chr2	27435042	27435292
chr17	48172453	48172703			chr2	27440188	27440438
chr17	48463846	48464096			chr2	27851694	27851944
chr17	48497991	48498241			chr2	27938315	27938565
chr17	48506079	48506329			chr2	27943007	27943257
chr17	48546152	48546402			chr2	28177670	28177920
chr17	48559892	48560142			chr2	28615457	28615707
chr17	48581526	48581776			chr2	28668811	28669061
chr17	48596064	48596314			chr2	28806907	28807157
chr17	48764105	48764355			chr2	28817298	28817548
chr17	48943758	48944008			chr2	28833506	28833756
chr17	48976386	48976636			chr2	28836924	28837174
chr17	48981692	48981942			chr2	28844455	28844705
chr17	48986670	48986920			chr2	29751954	29752204
chr17	49012726	49012976			chr1	118238776	118239026
chr17	49134420	49134670			chr2	29971015	29971265
chr17	49198239	49198489			chr2	30336559	30336809
chr17	49224460	49224710			chr2	30440609	30440859
chr17	49337691	49337941			chr2	30454230	30454480
chr17	49577024	49577274			chr2	30457111	30457361
chr17	49781012	49781262			chr2	30589317	30589567
chr17	49925919	49926169			chr2	30630840	30631090
chr17	50224787	50225037			chr2	30648252	30648502
chr17	50312926	50313176			chr2	30669997	30670247
chr17	51663468	51663718			chr2	30887856	30888106
chr17	52978035	52978285			chr2	30937920	30938170
chr17	53025766	53026016			chr1	118370856	118371106
chr17	53683926	53684176			chr2	31456728	31456978
chr17	53687259	53687509			chr2	31494694	31494944
chr17	53770641	53770891			chr2	31520604	31520854
chr17	53800318	53800568			chr2	31526134	31526384
chr17	54203790	54204040			chr2	31607670	31607920
chr17	54433616	54433866			chr1	118472198	118472448
chr17	54436090	54436340			chr2	31624531	31624781
chr1	8194132	8194382			chr2	32288504	32288754
chr17	54599235	54599485			chr2	32502868	32503118
chr17	54635438	54635688			chr2	32689614	32689864
chr17	54656216	54656466			chr2	32714144	32714394
chr17	54673864	54674114			chr2	33090582	33090832
chr17	54694730	54694980			chr2	33295004	33295254
chr17	54802594	54802844			chr2	33336037	33336287
chr17	54805608	54805858			chr2	33371270	33371520
chr17	54815144	54815394			chr2	33383580	33383830
chr17	54833653	54833903			chr2	33435750	33436000
chr17	54850160	54850410			chr2	33463238	33463488
chr17	54857674	54857924			chr2	33467974	33468224
chr17	54864466	54864716			chr2	33491027	33491277
chr17	54947761	54948011			chr2	33497128	33497378
chr17	55175198	55175448			chr2	33500834	33501084
chr17	55184944	55185194			chr2	33546641	33546891
chr17	55267760	55268010			chr2	33588730	33588980
chr17	55292793	55293043			chr2	33723736	33723986
chr17	55333360	55333610			chr2	33754940	33755190
chr17	55407295	55407545			chr1	9458161	9458411
chr17	55444078	55444328			chr2	36582861	36583111
chr17	55482848	55483098			chr2	36635330	36635580
chr17	55491572	55491822			chr2	36696043	36696293
chr17	55518643	55518893			chr2	36705480	36705730
chr17	55522456	55522706			chr2	36788779	36789029
chr17	55536828	55537078			chr2	36825202	36825452
chr17	55543342	55543592			chr2	37117009	37117259
chr17	55686744	55686994			chr2	37195688	37195938
chr17	55721877	55722127			chr2	37311432	37311682
chr17	55910474	55910724			chr2	37417012	37417262
chr17	55927394	55927644			chr2	37458685	37458935
chr17	55938716	55938966			chr2	37510385	37510635
chr17	55952801	55953051			chr2	37617612	37617862
chr17	56084576	56084826			chr2	37798118	37798368
chr1	95061212	95061462			chr2	37813423	37813673
chr17	56708964	56709214			chr1	119682843	119683093
chr17	56736402	56736652			chr2	37862623	37862873
chr17	56818574	56818824			chr2	37879261	37879511
chr17	57184109	57184359			chr2	37948012	37948262
chr17	57439810	57440060			chr2	38056294	38056544
chr17	57449613	57449863			chr2	38060650	38060900
chr17	57642800	57643050			chr2	38102616	38102866
chr17	57696904	57697154			chr2	38374018	38374268
chr17	57923021	57923271			chr2	38460748	38460998
chr17	57929326	57929576			chr1	120190839	120191089
chr17	57970250	57970500			chr2	38755172	38755422
chr17	58462762	58463012			chr2	38830068	38830318
chr17	58469528	58469778			chr2	39102990	39103240
chr17	58606371	58606621			chr2	39174422	39174672
chr1	8201955	8202205			chr1	120255289	120255539
chr17	59018480	59018730			chr2	39348063	39348313
[truncated: 10,155 more rows]

## Sheet: supplementary file 3c
Peaks more accessible in growth-plate chondrocytes											Peaks more accessible in articular chondrocytes
Ontology	GO-ID	Term	Binomial Raw P-Value	Binomial FDR Q-Val	Binomial Fold Enrichment	Raw Hyper P-value	Hyper FDR Q-Val	Hyper Fold Enrichment			Ontology	GO-ID	Term	Binomial Raw P-Value	Binomial FDR Q-Val	Binomial Fold Enrichment	Raw Hyper P-value	Hyper FDR Q-Val	Hyper Fold Enrichment
Ensembl Genes	9945	ZNF565	1.439831e-11	2.670743e-7	1.721380e+1	5.070893e-1	1.000000e+0	1.972039e+0			Ensembl Genes	15690	FGF1	6.231338e-15	1.155851e-10	1.135951e+1	4.449296e-1	1.000000e+0	2.247546e+0
	9947	ZFP14	1.170990e-10	1.086035e-6	1.429884e+1	5.070893e-1	1.000000e+0	1.972039e+0				11343	GLI2	4.872210e-13	4.518731e-9	6.597361e+0	4.449296e-1	1.000000e+0	2.247546e+0
	2244	ZNF37A	7.477090e-10	4.623085e-6	5.853724e+0	5.070893e-1	1.000000e+0	1.972039e+0				10764	HS1BP3	6.552879e-13	4.051645e-9	1.620873e+1	4.449296e-1	1.000000e+0	2.247546e+0
	6750	ACAN	1.990332e-9	9.229667e-6	1.108384e+1	5.070893e-1	1.000000e+0	1.972039e+0				14252	HES1	1.081241e-10	5.013985e-7	6.560753e+0	4.449296e-1	1.000000e+0	2.247546e+0
	17274	TNS3	2.534240e-9	9.401524e-6	4.517660e+0	5.070893e-1	1.000000e+0	1.972039e+0				17643	MET	1.995809e-10	7.404052e-7	1.043754e+1	4.449296e-1	1.000000e+0	2.247546e+0
	2713	TCF7L2	2.483792e-8	7.678643e-5	4.510410e+0	5.070893e-1	1.000000e+0	1.972039e+0				1966	IRF2BP2	2.303036e-10	7.119836e-7	7.163080e+0	4.449296e-1	1.000000e+0	2.247546e+0
	9082	SMAD7	3.559228e-8	9.431446e-5	4.863910e+0	5.070893e-1	1.000000e+0	1.972039e+0				15689	SPRY4	7.515507e-10	1.991502e-6	7.745273e+0	4.449296e-1	1.000000e+0	2.247546e+0
	7639	GSE1	4.623398e-8	1.071993e-4	6.190049e+0	5.070893e-1	1.000000e+0	1.972039e+0				858	BCL10	1.124309e-9	2.606851e-6	1.363497e+1	4.449296e-1	1.000000e+0	2.247546e+0
	12392	CEBPB	5.562857e-8	1.146505e-4	8.151935e+0	5.070893e-1	1.000000e+0	1.972039e+0				10763	RHOB	1.263586e-9	2.604251e-6	1.011857e+1	4.449296e-1	1.000000e+0	2.247546e+0
	12526	TPTE	5.592559e-8	1.037364e-4	4.722174e+0	5.070893e-1	1.000000e+0	1.972039e+0				4109	PKNOX2	1.405707e-9	2.607446e-6	8.945733e+0	4.449296e-1	1.000000e+0	2.247546e+0
	6749	ISG20	1.032641e-7	1.741314e-4	1.202871e+1	5.070893e-1	1.000000e+0	1.972039e+0				11341	INHBB	1.038902e-8	1.751872e-5	6.950786e+0	4.449296e-1	1.000000e+0	2.247546e+0
	20291	SLC9B1P1	1.264622e-7	1.954789e-4	3.923254e+0	5.070893e-1	1.000000e+0	1.972039e+0				19119	COL27A1	2.954085e-8	4.566277e-5	1.155554e+1	4.449296e-1	1.000000e+0	2.247546e+0
	2458	PPIF	1.269029e-7	1.810709e-4	7.541789e+0	5.070893e-1	1.000000e+0	1.972039e+0				19022	COL15A1	5.175762e-8	7.385016e-5	9.335079e+0	4.449296e-1	1.000000e+0	2.247546e+0
	7636	FAM92B	1.652286e-7	2.189161e-4	6.058674e+0	5.070893e-1	1.000000e+0	1.972039e+0				859	DDAH1	5.592051e-8	7.409068e-5	9.262603e+0	4.449296e-1	1.000000e+0	2.247546e+0
	17482	SMURF1	2.611377e-7	3.229229e-4	7.919066e+0	5.070893e-1	1.000000e+0	1.972039e+0				15764	G3BP1	5.894298e-8	7.288889e-5	2.143817e+1	4.449296e-1	1.000000e+0	2.247546e+0
	8580	MSI2	2.793160e-7	3.238145e-4	5.365817e+0	5.070893e-1	1.000000e+0	1.972039e+0				10771	ATAD2B	1.030122e-7	1.194233e-4	6.303717e+0	4.449296e-1	1.000000e+0	2.247546e+0
	10207	FOSB	4.812906e-7	5.251447e-4	2.176296e+1	5.070893e-1	1.000000e+0	1.972039e+0				15754	TNIP1	1.225394e-7	1.337049e-4	1.461935e+1	4.449296e-1	1.000000e+0	2.247546e+0
	6308	BMF	7.147363e-7	7.365358e-4	1.473548e+1	5.070893e-1	1.000000e+0	1.972039e+0				11737	TNP1	1.268115e-7	1.306793e-4	4.265251e+0	4.449296e-1	1.000000e+0	2.247546e+0
	12393	PTPN1	8.408017e-7	8.208437e-4	5.723751e+0	5.070893e-1	1.000000e+0	1.972039e+0				4110	FEZ1	1.458186e-7	1.423573e-4	7.442851e+0	4.449296e-1	1.000000e+0	2.247546e+0
	578	EDN2	1.250606e-6	1.159875e-3	5.518663e+0	5.070893e-1	1.000000e+0	1.972039e+0				14251	OPA1	1.638470e-7	1.519599e-4	6.062827e+0	4.449296e-1	1.000000e+0	2.247546e+0
	6955	KCTD5	1.484654e-6	1.311374e-3	1.044868e+1	5.070893e-1	1.000000e+0	1.972039e+0				5187	NCOR2	1.695968e-7	1.498024e-4	6.045232e+0	4.449296e-1	1.000000e+0	2.247546e+0
	8574	C17orf67	1.509449e-6	1.272671e-3	8.676649e+0	5.070893e-1	1.000000e+0	1.972039e+0				10711	ASAP2	1.943817e-7	1.638903e-4	7.241991e+0	4.449296e-1	1.000000e+0	2.247546e+0
	19970	PRPS1	1.782473e-6	1.437526e-3	8.499658e+0	5.070893e-1	1.000000e+0	1.972039e+0				14985	CBR4	2.081090e-7	1.678354e-4	5.125090e+0	4.449296e-1	1.000000e+0	2.247546e+0
	1491	C1orf192	1.808068e-6	1.397411e-3	1.017101e+1	5.070893e-1	1.000000e+0	1.972039e+0				10761	SDC1	2.409681e-7	1.862382e-4	9.180682e+0	4.449296e-1	1.000000e+0	2.247546e+0
	9248	CIRBP	2.222375e-6	1.648913e-3	4.599482e+1	5.070893e-1	1.000000e+0	1.972039e+0				10760	LAPTM4A	2.592049e-7	1.923197e-4	1.076515e+1	4.449296e-1	1.000000e+0	2.247546e+0
	15843	UBTD2	2.375784e-6	1.694939e-3	8.201293e+0	5.070893e-1	1.000000e+0	1.972039e+0				13264	IRAK2	2.632643e-7	1.878188e-4	1.713611e+1	4.449296e-1	1.000000e+0	2.247546e+0
	11148	ATOH8	2.420039e-6	1.662567e-3	9.772503e+0	5.070893e-1	1.000000e+0	1.972039e+0				11465	ITGB6	2.861302e-7	1.965714e-4	6.979178e+0	4.449296e-1	1.000000e+0	2.247546e+0
	7055	LITAF	2.430161e-6	1.609895e-3	1.222304e+1	5.070893e-1	1.000000e+0	1.972039e+0				15345	SCAMP1	2.969748e-7	1.967352e-4	7.814970e+0	4.449296e-1	1.000000e+0	2.247546e+0
	6492	LDHAL6B	2.985198e-6	1.909394e-3	7.970794e+0	5.070893e-1	1.000000e+0	1.972039e+0				1967	TOMM20	3.880846e-7	2.482269e-4	6.140812e+0	4.449296e-1	1.000000e+0	2.247546e+0
	2684	SH3PXD2A	3.009862e-6	1.860998e-3	6.133343e+0	5.070893e-1	1.000000e+0	1.972039e+0				10920	HAAO	5.960141e-7	3.685155e-4	6.502585e+0	4.449296e-1	1.000000e+0	2.247546e+0
GO Biological Process	GO:0032868	response to insulin	2.091145e-17	2.698204e-13	1.607395e+0	5.323558e-5	3.136524e-3	1.267059e+0			GO Biological Process	GO:0030198	extracellular matrix organization	2.159738e-34	2.786710e-30	1.676070e+0	1.517069e-10	2.276133e-8	1.404716e+0
	GO:0043062	extracellular structure organization	1.775645e-16	1.145557e-12	1.428980e+0	5.661672e-7	7.379046e-5	1.273743e+0				GO:0043062	extracellular structure organization	3.315956e-34	2.139289e-30	1.673352e+0	2.262739e-10	3.355876e-8	1.400111e+0
	GO:0030198	extracellular matrix organization	2.821650e-16	1.213592e-12	1.426243e+0	7.288046e-7	8.548878e-5	1.271446e+0				GO:0001944	vasculature development	8.985827e-26	3.864804e-22	1.380627e+0	5.200967e-26	1.118468e-22	1.529645e+0
	GO:0009894	regulation of catabolic process	5.886347e-16	1.898788e-12	1.324728e+0	1.496610e-3	4.091262e-2	1.123358e+0				GO:0001568	blood vessel development	1.018455e-24	3.285281e-21	1.378161e+0	1.156185e-24	1.491826e-21	1.527937e+0
	GO:0009057	macromolecule catabolic process	3.330596e-15	8.594936e-12	1.257943e+0	6.477995e-3	1.149733e-1	1.076745e+0				GO:0072358	cardiovascular system development	8.687151e-24	2.241806e-20	1.358939e+0	5.458286e-26	1.006118e-22	1.524463e+0
	GO:2001233	regulation of apoptotic signaling pathway	1.487906e-14	3.199742e-11	1.392363e+0	9.981944e-3	1.542479e-1	1.119407e+0				GO:0048646	anatomical structure formation involved in morphogenesis	6.143642e-22	1.321190e-18	1.265998e+0	7.676349e-27	1.980959e-23	1.408828e+0
	GO:0044265	cellular macromolecule catabolic process	3.172084e-14	5.847057e-11	1.273591e+0	1.443068e-2	1.917601e-1	1.073536e+0				GO:0001525	angiogenesis	2.448687e-21	4.513630e-18	1.462442e+0	1.298907e-17	7.286868e-15	1.552429e+0
	GO:0002274	myeloid leukocyte activation	4.547311e-14	7.334244e-11	1.352951e+0	2.876445e-1	8.379944e-1	1.024756e+0				GO:0048514	blood vessel morphogenesis	7.891262e-20	1.272762e-16	1.367824e+0	2.091976e-21	2.076367e-18	1.540318e+0
	GO:0001817	regulation of cytokine production	6.931628e-14	9.937644e-11	1.299926e+0	3.624981e-2	3.394276e-1	1.072398e+0				GO:0042060	wound healing	9.260235e-19	1.327609e-15	1.392250e+0	1.724684e-8	1.636294e-6	1.285000e+0
	GO:0045321	leukocyte activation	7.877663e-14	1.016455e-10	1.251186e+0	1.947799e-1	7.802686e-1	1.029286e+0				GO:0072359	circulatory system development	2.288544e-18	2.952908e-15	1.235838e+0	1.166161e-32	1.504698e-28	1.462328e+0
	GO:1903706	regulation of hemopoiesis	1.020009e-13	1.196471e-10	1.333393e+0	1.554303e-2	2.019655e-1	1.102022e+0				GO:0051272	positive regulation of cellular component movement	5.192216e-17	6.090469e-14	1.332191e+0	2.185610e-14	7.833591e-12	1.396582e+0
	GO:0032869	cellular response to insulin stimulus	1.142034e-13	1.227972e-10	1.622816e+0	2.382539e-3	5.767711e-2	1.234201e+0				GO:0043065	positive regulation of apoptotic process	6.975424e-17	7.500325e-14	1.313200e+0	3.551554e-10	5.091745e-8	1.281596e+0
	GO:0009725	response to hormone	2.842110e-13	2.820903e-10	1.228564e+0	1.124136e-7	1.986949e-5	1.179679e+0				GO:0001501	skeletal system development	1.090027e-16	1.081894e-13	1.303333e+0	1.498902e-14	5.688333e-12	1.392029e+0
	GO:0044403	symbiosis, encompassing mutualism through parasitism	5.295149e-13	4.880236e-10	1.288515e+0	1.940424e-2	2.309713e-1	1.077476e+0				GO:0030335	positive regulation of cell migration	1.245436e-16	1.147847e-13	1.335984e+0	2.335911e-14	8.146016e-12	1.409388e+0
	GO:0034248	regulation of cellular amide metabolic process	5.699407e-13	4.902630e-10	1.347676e+0	5.116716e-2	4.139247e-1	1.076441e+0				GO:2000147	positive regulation of cell motility	1.935957e-16	1.665310e-13	1.328756e+0	1.723146e-14	6.352501e-12	1.402797e+0
	GO:0045786	negative regulation of cell cycle	6.198307e-13	4.998547e-10	1.289496e+0	9.425015e-4	2.916330e-2	1.129408e+0				GO:0043068	positive regulation of programmed cell death	2.175680e-16	1.754550e-13	1.306368e+0	1.021456e-9	1.292142e-7	1.272480e+0
	GO:0044419	interspecies interaction between organisms	6.275763e-13	4.763304e-10	1.287169e+0	1.959287e-2	2.327871e-1	1.077212e+0				GO:0010942	positive regulation of cell death	2.265038e-16	1.719164e-13	1.294044e+0	1.067863e-9	1.337732e-7	1.261842e+0
	GO:0022411	cellular component disassembly	1.251119e-12	8.968438e-10	1.398529e+0	1.386296e-1	6.445902e-1	1.055738e+0				GO:0040017	positive regulation of locomotion	5.075327e-16	3.638164e-13	1.314513e+0	6.903563e-14	2.172602e-11	1.380156e+0
	GO:0009896	positive regulation of catabolic process	1.257539e-12	8.540014e-10	1.365128e+0	1.905956e-3	4.869812e-2	1.154643e+0				GO:2001233	regulation of apoptotic signaling pathway	2.257121e-15	1.532823e-12	1.416088e+0	1.059730e-5	4.453973e-4	1.245987e+0
	GO:0006417	regulation of translation	1.446233e-12	9.330372e-10	1.359240e+0	6.384859e-2	4.715732e-1	1.074389e+0				GO:0009611	response to wounding	2.978727e-15	1.921726e-12	1.312415e+0	7.068668e-10	9.402786e-8	1.286051e+0
	GO:0010608	posttranscriptional regulation of gene expression	1.764042e-12	1.083878e-9	1.319559e+0	2.853971e-1	8.318226e-1	1.025176e+0				GO:0060681	branch elongation involved in ureteric bud branching	6.231338e-15	3.828712e-12	1.135951e+1	4.449296e-1	9.818585e-1	2.247546e+0
	GO:0030155	regulation of cell adhesion	3.099204e-12	1.817683e-9	1.221032e+0	3.211318e-9	9.007747e-7	1.220786e+0				GO:1902105	regulation of leukocyte differentiation	2.189647e-14	1.284228e-11	1.435661e+0	1.095290e-5	4.573633e-4	1.302150e+0
	GO:0002252	immune effector process	3.444504e-12	1.932367e-9	1.249065e+0	5.106167e-1	9.488029e-1	1.000246e+0				GO:0032963	collagen metabolic process	3.200745e-14	1.795618e-11	1.903429e+0	3.521621e-3	5.265293e-2	1.360357e+0
	GO:0031329	regulation of cellular catabolic process	4.029987e-12	2.166622e-9	1.337868e+0	1.883575e-2	2.256617e-1	1.103170e+0				GO:0008283	cell proliferation	3.475973e-14	1.868770e-11	1.241556e+0	2.428553e-11	4.352169e-9	1.279118e+0
	GO:0002444	myeloid leukocyte mediated immunity	5.554260e-12	2.866665e-9	1.347663e+0	2.682436e-1	7.923872e-1	1.028554e+0				GO:1903706	regulation of hemopoiesis	4.473363e-14	2.308792e-11	1.347415e+0	4.220909e-2	2.969596e-1	1.093263e+0
	GO:0031400	negative regulation of protein modification process	7.652027e-12	3.797466e-9	1.242032e+0	5.081526e-6	4.929844e-4	1.173604e+0				GO:0030155	regulation of cell adhesion	4.778713e-14	2.371528e-11	1.246161e+0	6.704033e-16	3.089362e-13	1.346456e+0
	GO:0045862	positive regulation of proteolysis	1.564757e-11	7.477800e-9	1.341839e+0	4.135496e-3	8.578827e-2	1.135099e+0				GO:0007599	hemostasis	5.870782e-14	2.805581e-11	1.447485e+0	9.223079e-5	2.881486e-3	1.240529e+0
	GO:0002275	myeloid cell activation involved in immune response	1.597340e-11	7.360885e-9	1.339285e+0	2.674343e-1	8.017437e-1	1.028721e+0				GO:0097084	vascular smooth muscle cell development	7.792047e-14	3.590742e-11	4.507404e+0	8.374475e-2	4.743453e-1	1.685660e+0
	GO:0043618	regulation of transcription from RNA polymerase II promoter in response to stress	1.604024e-11	7.136801e-9	1.787271e+0	2.141485e-1	7.951534e-1	1.082004e+0				GO:0030334	regulation of cell migration	7.848041e-14	3.491837e-11	1.218895e+0	5.155715e-29	3.326210e-25	1.458380e+0
	GO:0071363	cellular response to growth factor stimulus	1.959738e-11	8.428833e-9	1.244717e+0	4.530832e-7	6.354492e-5	1.221990e+0				GO:0022407	regulation of cell-cell adhesion	8.102972e-14	3.485088e-11	1.329987e+0	4.364327e-7	2.619205e-5	1.276245e+0
GO Cellular Component	GO:1990904	ribonucleoprotein complex	4.357552e-16	7.255324e-13	1.330079e+0	3.801350e-1	1.000000e+0	1.011552e+0			GO Cellular Component	GO:0005925	focal adhesion	4.925130e-33	8.200341e-30	1.605885e+0	7.781955e-14	3.239239e-11	1.414699e+0
	GO:0030529	intracellular ribonucleoprotein complex	6.086769e-16	5.067235e-13	1.328557e+0	3.931109e-1	1.000000e+0	1.010426e+0				GO:0005924	cell-substrate adherens junction	7.374839e-33	6.139553e-30	1.602942e+0	1.239605e-13	4.127885e-11	1.409670e+0
	GO:0015629	actin cytoskeleton	7.170124e-12	3.979419e-9	1.299529e+0	1.086773e-6	1.391905e-4	1.216882e+0				GO:0030055	cell-substrate junction	7.683954e-31	4.264594e-28	1.573683e+0	6.393719e-14	3.548514e-11	1.412423e+0
	GO:0005925	focal adhesion	1.533164e-11	6.381795e-9	1.318501e+0	4.227174e-10	2.346082e-7	1.301346e+0				GO:0070161	anchoring junction	3.851756e-27	1.603293e-24	1.430687e+0	4.340555e-19	7.227024e-16	1.429474e+0
	GO:1904813	ficolin-1-rich granule lumen	1.982890e-11	6.603024e-9	1.771179e+0	3.443569e-2	4.154741e-1	1.167447e+0				GO:0005912	adherens junction	1.826064e-25	6.080793e-23	1.421760e+0	2.078774e-17	1.730579e-14	1.415287e+0
	GO:0005924	cell-substrate adherens junction	2.537028e-11	7.040253e-9	1.314221e+0	1.305993e-9	4.348957e-7	1.291512e+0				GO:0031012	extracellular matrix	1.104171e-17	3.064075e-15	1.324923e+0	1.991850e-8	3.014937e-6	1.259927e+0
	GO:0030055	cell-substrate junction	2.333551e-10	5.550518e-8	1.293513e+0	4.439679e-10	1.848016e-7	1.298300e+0				GO:0044420	extracellular matrix component	1.170507e-17	2.784135e-15	1.677486e+0	6.000846e-8	6.660939e-6	1.548729e+0
	GO:0016604	nuclear body	4.836369e-10	1.006569e-7	1.220031e+0	7.472128e-3	1.574822e-1	1.089160e+0				GO:0005788	endoplasmic reticulum lumen	6.342764e-15	1.320088e-12	1.451793e+0	9.365766e-5	2.998846e-3	1.245262e+0
	GO:0001726	ruffle	7.610258e-10	1.407898e-7	1.457614e+0	7.758266e-5	4.784264e-3	1.294529e+0				GO:0001726	ruffle	3.699206e-14	6.843531e-12	1.589737e+0	1.028961e-5	4.758945e-4	1.378863e+0
	GO:0005912	adherens junction	1.746465e-9	2.907864e-7	1.229027e+0	4.542890e-13	7.563912e-10	1.308184e+0				GO:0005578	proteinaceous extracellular matrix	9.132636e-14	1.520584e-11	1.321565e+0	6.652033e-12	1.582234e-9	1.398473e+0
	GO:0070461	SAGA-type complex	4.880037e-9	7.386601e-7	2.665282e+0	1.818919e-1	9.769355e-1	1.213563e+0				GO:0005604	basement membrane	4.513983e-13	6.832529e-11	1.653618e+0	2.792402e-6	1.788211e-4	1.539081e+0
	GO:0032587	ruffle membrane	5.795208e-9	8.040851e-7	1.607708e+0	2.777309e-3	8.563369e-2	1.299753e+0				GO:0015629	actin cytoskeleton	5.002332e-12	6.940736e-10	1.309774e+0	1.644300e-10	3.041955e-8	1.327872e+0
	GO:0031983	vesicle lumen	1.085554e-8	1.390344e-6	1.342778e+0	7.586960e-1	1.000000e+0	9.656593e-1				GO:0010008	endosome membrane	3.302599e-10	4.229867e-8	1.297699e+0	4.915703e-6	2.923088e-4	1.237704e+0
	GO:0034774	secretory granule lumen	1.105025e-8	1.314190e-6	1.352275e+0	6.439531e-1	1.000000e+0	9.829478e-1				GO:0042641	actomyosin	4.105431e-10	4.882530e-8	1.746227e+0	6.702646e-7	4.649961e-5	1.685660e+0
	GO:0036488	CHOP-C/EBP complex	1.991799e-8	2.210897e-6	7.988490e+0	2.571261e-1	1.000000e+0	1.972039e+0				GO:0001725	stress fiber	1.288685e-9	1.430440e-7	1.825450e+0	8.957501e-5	3.043722e-3	1.599216e+0
	GO:0060205	cytoplasmic vesicle lumen	2.062051e-8	2.145822e-6	1.337194e+0	7.755477e-1	1.000000e+0	9.626818e-1				GO:0032587	ruffle membrane	1.680379e-9	1.748644e-7	1.648505e+0	1.048644e-3	2.359449e-2	1.379176e+0
	GO:0070161	anchoring junction	2.537384e-8	2.485144e-6	1.207674e+0	3.035223e-12	2.526823e-9	1.292026e+0				GO:0098644	complex of collagen trimers	2.219546e-9	2.173849e-7	2.267839e+0	5.627976e-3	9.863768e-2	1.685660e+0
	GO:0035976	transcription factor AP-1 complex	4.369854e-8	4.042115e-6	4.799158e+0	3.351157e-2	4.133094e-1	1.972039e+0				GO:0005583	fibrillar collagen trimer	3.728976e-9	3.449303e-7	2.656580e+0	7.128182e-3	1.186842e-1	1.872955e+0
	GO:0098560	cytoplasmic side of late endosome membrane	4.463949e-8	3.911829e-6	9.475278e+0	2.571261e-1	1.000000e+0	1.972039e+0				GO:0044440	endosomal part	6.552804e-9	5.742326e-7	1.259590e+0	1.572543e-5	6.713549e-4	1.213486e+0
	GO:0098574	cytoplasmic side of lysosomal membrane	5.332302e-8	4.439141e-6	5.313031e+0	3.571111e-1	1.000000e+0	1.314693e+0				GO:0098589	membrane region	1.442189e-8	1.200622e-6	1.258464e+0	5.330070e-7	3.858507e-5	1.282600e+0
	GO:0000785	chromatin	5.700871e-8	4.519976e-6	1.243378e+0	1.420713e-1	8.601771e-1	1.049568e+0				GO:0032154	cleavage furrow	2.676471e-8	2.122059e-6	1.868505e+0	2.009353e-2	2.613729e-1	1.339883e+0
	GO:0030141	secretory granule	6.455709e-8	4.885798e-6	1.196202e+0	4.809221e-1	1.000000e+0	1.002813e+0				GO:0032432	actin filament bundle	2.693376e-8	2.038396e-6	1.691638e+0	1.423169e-4	4.308321e-3	1.550032e+0
	GO:0005788	endoplasmic reticulum lumen	8.122275e-8	5.879821e-6	1.293743e+0	8.301110e-3	1.645399e-1	1.139252e+0				GO:0005582	collagen type XV trimer	5.175762e-8	3.746802e-6	9.335079e+0	4.449296e-1	1.000000e+0	2.247546e+0
	GO:0005577	fibrinogen complex	9.853261e-8	6.835700e-6	2.836121e+0	9.696752e-2	7.799561e-1	1.533808e+0				GO:0099080	supramolecular complex	8.138618e-8	5.646166e-6	1.172960e+0	4.629496e-2	4.847868e-1	1.062027e+0
	GO:0005594	collagen type IX trimer	1.205196e-7	8.026605e-6	5.342459e+0	1.303722e-1	9.159060e-1	1.972039e+0				GO:0098636	protein complex involved in cell adhesion	8.768322e-8	5.839702e-6	1.994391e+0	1.150423e-3	2.455711e-2	1.605390e+0
	GO:0005815	microtubule organizing center	1.311190e-7	8.396659e-6	1.193695e+0	1.251018e-3	4.959393e-2	1.114631e+0				GO:0045171	intercellular bridge	9.836759e-8	6.299309e-6	2.033543e+0	5.070643e-1	1.000000e+0	1.021612e+0
	GO:0044452	nucleolar part	1.364895e-7	8.416853e-6	1.425888e+0	5.748482e-1	1.000000e+0	9.916540e-1				GO:0045121	membrane raft	1.056793e-7	6.516890e-6	1.265778e+0	4.527746e-6	2.792110e-4	1.289699e+0
	GO:0016607	nuclear speck	2.494297e-7	1.483216e-5	1.252509e+0	1.069337e-2	1.956534e-1	1.119265e+0				GO:0099081	supramolecular polymer	1.127759e-7	6.706138e-6	1.170935e+0	4.999559e-2	5.106911e-1	1.060723e+0
	GO:0005757	mitochondrial permeability transition pore complex	4.865160e-7	2.793273e-5	5.527481e+0	3.231890e-1	1.000000e+0	1.479029e+0				GO:0098857	membrane microdomain	1.346066e-7	7.728275e-6	1.263079e+0	5.955665e-6	3.305394e-4	1.285386e+0
	GO:0000790	nuclear chromatin	6.159108e-7	3.418305e-5	1.272555e+0	1.875068e-1	9.942638e-1	1.052174e+0				GO:0099512	supramolecular fiber	2.642874e-7	1.466795e-5	1.166679e+0	5.588556e-2	5.538658e-1	1.058988e+0
GO Molecular Function	GO:0032403	protein complex binding	3.099207e-17	1.292989e-13	1.291723e+0	1.289900e-2	3.281380e-1	1.078183e+0			GO Molecular Function	GO:0050839	cell adhesion molecule binding	7.389022e-16	3.082700e-12	1.343670e+0	3.129234e-10	6.527582e-7	1.321226e+0
	GO:0019900	kinase binding	5.503226e-16	1.147973e-12	1.286047e+0	5.154966e-12	5.376630e-9	1.258813e+0				GO:0019838	growth factor binding	3.275079e-15	6.831815e-12	1.614731e+0	9.601503e-9	6.676245e-6	1.555994e+0
	GO:0019901	protein kinase binding	1.291053e-13	1.795424e-10	1.277670e+0	8.822085e-10	2.300359e-7	1.246049e+0				GO:0005178	integrin binding	2.396076e-14	3.332143e-11	1.715082e+0	1.239842e-4	1.175596e-2	1.402139e+0
	GO:0045296	cadherin binding	8.395723e-12	8.756739e-9	1.382580e+0	4.540377e-10	1.353032e-7	1.342803e+0				GO:0045296	cadherin binding	3.257021e-14	3.397073e-11	1.439801e+0	2.661965e-7	7.932656e-5	1.323391e+0
	GO:0008134	transcription factor binding	8.429450e-12	7.033533e-9	1.247200e+0	3.266106e-10	1.135516e-7	1.260326e+0				GO:0032403	protein complex binding	9.195733e-14	7.672920e-11	1.262233e+0	6.818596e-5	7.294149e-3	1.151112e+0
	GO:0005518	collagen binding	3.317391e-11	2.306693e-8	1.795030e+0	3.828458e-2	6.655136e-1	1.232524e+0				GO:0005024	transforming growth factor beta-activated receptor activity	3.613787e-11	2.512787e-8	2.917649e+0	4.660174e-2	6.590592e-1	1.748092e+0
	GO:0030617	transforming growth factor beta receptor, inhibitory cytoplasmic mediator activity	1.275344e-9	7.601050e-7	4.341188e+0	2.571261e-1	1.000000e+0	1.972039e+0				GO:0008201	heparin binding	4.326489e-11	2.578587e-8	1.477322e+0	7.379096e-3	2.424062e-1	1.222103e+0
	GO:0000975	regulatory region DNA binding	4.416682e-9	2.303300e-6	1.156891e+0	5.269543e-13	7.328178e-10	1.236029e+0				GO:0003779	actin binding	5.496570e-11	2.866461e-8	1.301629e+0	2.048176e-9	2.136248e-6	1.328350e+0
	GO:0001067	regulatory region nucleic acid binding	4.498277e-9	2.085201e-6	1.156664e+0	4.200374e-13	1.752396e-9	1.236900e+0				GO:0071820	N-box binding	1.081241e-10	5.012153e-8	6.560753e+0	4.449296e-1	1.000000e+0	2.247546e+0
	GO:0044212	transcription regulatory region DNA binding	5.096621e-9	2.126310e-6	1.156293e+0	4.927132e-13	1.027800e-9	1.236623e+0				GO:0005008	hepatocyte growth factor-activated receptor activity	1.995809e-10	8.326515e-8	1.043754e+1	4.449296e-1	1.000000e+0	2.247546e+0
	GO:0005520	insulin-like growth factor binding	6.249057e-9	2.370097e-6	1.970186e+0	1.185598e-4	8.832705e-3	1.690319e+0				GO:0005518	collagen binding	2.793581e-10	1.059529e-7	1.772344e+0	2.047658e-4	1.675065e-2	1.510070e+0
	GO:0019864	IgG binding	1.907217e-8	6.630758e-6	4.210652e+0	6.404018e-1	1.000000e+0	9.860196e-1				GO:0042813	Wnt-activated receptor activity	1.064772e-9	3.701857e-7	2.234335e+0	7.126350e-4	4.308860e-2	1.819442e+0
	GO:0019838	growth factor binding	4.676205e-8	1.500702e-5	1.400742e+0	3.912838e-7	5.265923e-5	1.425936e+0				GO:0005539	glycosaminoglycan binding	1.271186e-9	4.079529e-7	1.375121e+0	1.202905e-2	3.437342e-1	1.175322e+0
	GO:0070182	DNA polymerase binding	4.782188e-8	1.425092e-5	3.613344e+0	4.241986e-1	1.000000e+0	1.109272e+0				GO:0017147	Wnt-protein binding	1.318318e-9	3.928588e-7	1.978490e+0	1.946738e-4	1.624358e-2	1.740036e+0
	GO:0050839	cell adhesion molecule binding	6.176702e-8	1.717947e-5	1.218782e+0	2.045685e-10	7.758725e-8	1.283323e+0				GO:0048407	platelet-derived growth factor binding	6.271904e-9	1.744426e-6	2.642851e+0	1.347713e-4	1.222317e-2	2.247546e+0
	GO:0070016	armadillo repeat domain binding	8.539946e-8	2.226791e-5	2.804476e+0	5.980202e-2	8.486191e-1	1.577631e+0				GO:0016403	dimethylargininase activity	7.397044e-9	1.928779e-6	9.830989e+0	1.979491e-1	1.000000e+0	2.247546e+0
	GO:0016176	superoxide-generating NADPH oxidase activator activity	8.658139e-8	2.124809e-5	3.863951e+0	1.539810e-1	1.000000e+0	1.479029e+0				GO:0046789	host cell surface receptor binding	1.038902e-8	2.549588e-6	6.950786e+0	4.449296e-1	1.000000e+0	2.247546e+0
	GO:0030020	extracellular matrix structural constituent conferring tensile strength	9.323113e-8	2.160890e-5	3.301835e+0	1.698890e-2	3.981893e-1	1.972039e+0				GO:1901681	sulfur compound binding	1.065426e-8	2.469421e-6	1.336282e+0	4.068880e-4	2.829228e-2	1.249713e+0
	GO:0008859	exoribonuclease II activity	1.032641e-7	2.267462e-5	1.202871e+1	5.070893e-1	1.000000e+0	1.972039e+0				GO:0005201	extracellular matrix structural constituent	1.225349e-8	2.690608e-6	1.619918e+0	1.258946e-3	6.484349e-2	1.394048e+0
	GO:0048185	activin binding	1.083390e-7	2.259952e-5	2.509107e+0	4.064964e-1	1.000000e+0	1.150356e+0				GO:0005025	transforming growth factor beta receptor activity, type I	1.373278e-8	2.864658e-6	3.853494e+0	2.347264e-1	1.000000e+0	1.685660e+0
	GO:0070411	I-SMAD binding	1.243826e-7	2.471068e-5	2.175835e+0	3.624908e-2	6.575268e-1	1.613487e+0				GO:0017017	MAP kinase tyrosine/serine/threonine phosphatase activity	1.411369e-8	2.803920e-6	2.460903e+0	1.854937e-2	4.094602e-1	1.728882e+0
	GO:0019904	protein domain specific binding	1.255481e-7	2.380849e-5	1.171393e+0	9.068103e-7	1.112710e-4	1.175857e+0				GO:0033549	MAP kinase phosphatase activity	2.123970e-8	4.027819e-6	2.428499e+0	3.916140e-2	6.308161e-1	1.605390e+0
	GO:0001103	RNA polymerase II repressing transcription factor binding	1.592422e-7	2.888515e-5	1.994716e+0	2.529107e-1	1.000000e+0	1.156023e+0				GO:0044548	S100 protein binding	2.213252e-8	4.014647e-6	3.212332e+0	1.690250e-1	1.000000e+0	1.383105e+0
	GO:0008289	lipid binding	2.246051e-7	3.904385e-5	1.180545e+0	4.662134e-3	1.736645e-1	1.099218e+0				GO:0019900	kinase binding	2.659294e-8	4.622739e-6	1.196801e+0	5.832231e-6	1.158670e-3	1.191512e+0
	GO:0070491	repressing transcription factor binding	3.327664e-7	5.553206e-5	1.558824e+0	4.254469e-3	1.613604e-1	1.347560e+0				GO:0005085	guanyl-nucleotide exchange factor activity	3.791868e-8	6.327869e-6	1.269947e+0	4.899789e-6	1.022096e-3	1.277332e+0
	GO:0051721	protein phosphatase 2A binding	6.409578e-7	1.028491e-4	1.937283e+0	9.603133e-4	5.564482e-2	1.606847e+0				GO:0035497	cAMP response element binding	9.158428e-8	1.469575e-5	2.666467e+0	1.690250e-1	1.000000e+0	1.383105e+0
	GO:0031994	insulin-like growth factor I binding	8.380484e-7	1.294940e-4	2.345048e+0	2.880784e-4	1.877911e-2	1.972039e+0				GO:0005126	cytokine receptor binding	1.397973e-7	2.160127e-5	1.327467e+0	6.380723e-2	8.091300e-1	1.107125e+0
	GO:0019902	phosphatase binding	1.103978e-6	1.644927e-4	1.340461e+0	7.527701e-6	6.979015e-4	1.339498e+0				GO:0005088	Ras guanyl-nucleotide exchange factor activity	1.422510e-7	2.119540e-5	1.281504e+0	1.781064e-6	4.370941e-4	1.332215e+0
	GO:0008296	3'-5'-exodeoxyribonuclease activity	1.813271e-6	2.608609e-4	4.931455e+0	3.944892e-1	1.000000e+0	1.183223e+0				GO:0004675	transmembrane receptor protein serine/threonine kinase activity	1.633564e-7	2.350079e-5	2.109733e+0	7.657788e-3	2.495960e-1	1.718712e+0
	GO:0005072	transforming growth factor beta receptor, cytoplasmic mediator activity	2.179882e-6	3.031489e-4	2.367026e+0	1.836870e-1	1.000000e+0	1.380427e+0				GO:0043184	vascular endothelial growth factor receptor 2 binding	2.004041e-7	2.786953e-5	3.100508e+0	3.356975e-2	6.062900e-1	1.926468e+0
Human Phenotype	HP:0006487	Bowing of the long bones	1.088922e-21	7.232620e-18	1.898525e+0	6.152619e-6	9.729927e-4	1.408599e+0			Human Phenotype	HP:0002692	Hypoplastic facial bones	4.358615e-12	2.894992e-8	3.492916e+0	7.750144e-3	1.361811e-1	2.247546e+0
	HP:0006504	Anomaly of the limb diaphyses	1.351038e-21	4.486797e-18	1.895337e+0	1.062232e-5	1.383401e-3	1.396134e+0				HP:0002758	Osteoarthritis	1.550997e-11	5.150861e-8	2.226084e+0	4.469057e-2	3.973692e-1	1.377528e+0
	HP:0000940	Abnormal diaphysis morphology	1.151128e-20	2.548597e-17	1.853961e+0	2.976005e-5	2.502104e-3	1.363994e+0				HP:0006094	Finger joint hypermobility	4.519816e-11	1.000687e-7	2.522199e+0	4.875892e-4	2.130636e-2	1.966603e+0
	HP:0002979	Bowing of the legs	7.310289e-20	1.213873e-16	1.966687e+0	2.528626e-5	2.269613e-3	1.424250e+0				HP:0001623	Breech presentation	1.574071e-10	2.613745e-7	3.968338e+0	1.649665e-1	7.656936e-1	1.430257e+0
	HP:0002981	Abnormality of the calf	2.526005e-17	3.355545e-14	1.770372e+0	3.468394e-5	2.678729e-3	1.382270e+0				HP:0006766	Papillary renal cell carcinoma	1.619853e-10	2.151813e-7	9.508864e+0	1.979491e-1	8.509889e-1	2.247546e+0
	HP:0011314	Abnormality of long bone morphology	1.203125e-15	1.331859e-12	1.384846e+0	5.451129e-6	1.005733e-3	1.245166e+0				HP:0002744	Bilateral cleft lip and palate	2.960629e-10	3.277416e-7	4.495923e+0	1.979491e-1	8.509889e-1	2.247546e+0
	HP:0002970	Genu varum	6.212659e-15	5.894926e-12	4.352152e+0	1.641427e-1	8.221990e-1	1.314693e+0				HP:0010650	Hypoplasia of the premaxilla	2.960629e-10	3.277416e-7	4.495923e+0	1.979491e-1	8.509889e-1	2.247546e+0
	HP:0002857	Genu valgum	5.812548e-14	4.825868e-11	2.180181e+0	7.500017e-4	2.767506e-2	1.468540e+0				HP:0001075	Atrophic scars	4.254572e-10	3.532358e-7	2.601141e+0	4.306904e-3	9.227889e-2	1.748092e+0
	HP:0010574	Abnormality of the epiphysis of the femoral head	1.165388e-13	8.600563e-11	2.628409e+0	4.746742e-2	4.705651e-1	1.314693e+0				HP:0100337	Bilateral cleft palate	4.631402e-10	3.417975e-7	4.257600e+0	8.806156e-2	5.932098e-1	2.247546e+0
	HP:0005930	Abnormality of epiphysis morphology	1.539163e-13	1.022312e-10	1.626434e+0	7.538735e-3	1.418478e-1	1.226310e+0				HP:0100336	Bilateral cleft lip	4.631402e-10	3.417975e-7	4.257600e+0	8.806156e-2	5.932098e-1	2.247546e+0
	HP:0040069	Abnormality of lower limb bone	1.139074e-12	6.877936e-10	1.337375e+0	1.239719e-5	1.419692e-3	1.234887e+0				HP:0010758	Abnormality of the premaxilla	5.789625e-10	3.495881e-7	4.084969e+0	5.482197e-1	9.174289e-1	1.123773e+0
	HP:0002815	Abnormality of the knee	1.295993e-12	7.173321e-10	1.622750e+0	5.639826e-3	1.177979e-1	1.221487e+0				HP:0000326	Abnormality of the maxilla	8.284430e-10	4.585432e-7	1.657557e+0	1.163115e-3	3.921528e-2	1.450030e+0
	HP:0006499	Abnormality of femoral epiphysis	1.947095e-12	9.948158e-10	2.358516e+0	2.487202e-2	3.195357e-1	1.352255e+0				HP:0045038	Gastric lymphoma	1.124309e-9	5.744354e-7	1.363497e+1	4.449296e-1	1.000000e+0	2.247546e+0
	HP:0006505	Abnormality of limb epiphysis morphology	1.999622e-12	9.486778e-10	1.851843e+0	5.770641e-2	5.421301e-1	1.200372e+0				HP:0100338	Non-midline cleft palate	1.868356e-9	8.864015e-7	3.873446e+0	3.917329e-2	3.727636e-1	2.247546e+0
	HP:0006500	Abnormality of lower limb epiphysis morphology	2.081724e-12	9.217874e-10	2.342018e+0	1.771904e-2	2.615330e-1	1.369472e+0				HP:0006460	Increased laxity of ankles	2.381196e-9	1.054394e-6	5.460485e+0	8.806156e-2	5.932098e-1	2.247546e+0
	HP:0003368	Abnormality of the femoral head	2.845199e-12	1.181113e-9	2.427288e+0	8.418644e-2	6.268681e-1	1.245498e+0				HP:0006149	Increased laxity of fingers	2.381196e-9	1.054394e-6	5.460485e+0	8.806156e-2	5.932098e-1	2.247546e+0
	HP:0003693	Distal amyotrophy	3.559282e-12	1.390632e-9	1.858014e+0	2.371657e-1	9.882400e-1	1.085729e+0				HP:0005072	Hyperextensibility at wrists	2.381196e-9	1.054394e-6	5.460485e+0	8.806156e-2	5.932098e-1	2.247546e+0
	HP:0000944	Abnormality of the metaphysis	4.747935e-12	1.751988e-9	1.722798e+0	1.812057e-4	9.258217e-3	1.371853e+0				HP:0001230	Broad metacarpals	2.537399e-9	9.363002e-7	4.517197e+0	6.579730e-2	5.081694e-1	1.872955e+0
	HP:0002814	Abnormality of the lower limb	6.344529e-12	2.217914e-9	1.207865e+0	2.104533e-5	1.996901e-3	1.141054e+0				HP:0004334	Dermal atrophy	2.915898e-9	1.019337e-6	1.938285e+0	3.739577e-2	3.663462e-1	1.311069e+0
	HP:0100491	Abnormality of lower limb joint	1.608544e-11	5.341975e-9	1.401753e+0	4.646869e-3	1.011951e-1	1.165659e+0				HP:0001871	Abnormality of blood and blood-forming tissues	3.488101e-9	1.158398e-6	1.242858e+0	1.914178e-2	2.389844e-1	1.090975e+0
	HP:0003481	Segmental peripheral demyelination/remyelination	2.058149e-11	6.509631e-9	3.381688e+0	2.212792e-3	6.073291e-2	1.972039e+0				HP:0011272	Underdeveloped tragus	4.391071e-9	1.388833e-6	4.082320e+0	1.979491e-1	8.509889e-1	2.247546e+0
	HP:0003071	Flattened epiphysis	2.110007e-11	6.370303e-9	2.892716e+0	2.800775e-2	3.457760e-1	1.508030e+0				HP:0009932	Single naris	5.195563e-9	1.568588e-6	4.190463e+0	8.290033e-1	1.000000e+0	7.491821e-1
	HP:0002652	Skeletal dysplasia	2.181543e-11	6.299917e-9	1.913240e+0	1.512576e-3	4.587457e-2	1.413915e+0				HP:0000977	Soft skin	8.450677e-9	2.440409e-6	2.556552e+0	3.907210e-1	1.000000e+0	1.123773e+0
	HP:0002823	Abnormality of femur morphology	2.545883e-11	7.045731e-9	1.529546e+0	6.212923e-3	1.269730e-1	1.222970e+0				HP:0000395	Prominent antihelix	1.114304e-8	3.083836e-6	3.565404e+0	6.579730e-2	5.081694e-1	1.872955e+0
	HP:0002829	Arthralgia	3.189847e-11	8.474786e-9	2.172591e+0	1.047105e-2	1.787885e-1	1.380427e+0				HP:0001058	Poor wound healing	1.254464e-8	3.332860e-6	3.644397e+0	3.809656e-1	1.000000e+0	1.284312e+0
	HP:0000926	Platyspondyly	9.034952e-11	2.308083e-8	1.890608e+0	7.095192e-3	1.390155e-1	1.305026e+0				HP:0010626	Anterior pituitary agenesis	1.906856e-8	4.871284e-6	3.915233e+0	6.919102e-1	1.000000e+0	1.123773e+0
	HP:0001760	Abnormality of the foot	9.565005e-11	2.352991e-8	1.217364e+0	5.800652e-5	4.098716e-3	1.148315e+0				HP:0000873	Diabetes insipidus	2.455160e-8	6.039694e-6	2.393296e+0	5.916685e-1	9.585030e-1	9.989095e-1
	HP:0011821	Abnormality of facial skeleton	1.026380e-10	2.434720e-8	1.243707e+0	4.524635e-6	9.694395e-4	1.190024e+0				HP:0000591	Abnormality of the sclera	3.078124e-8	7.301750e-6	1.737944e+0	1.023919e-2	1.654713e-1	1.373501e+0
	HP:0001547	Abnormality of the rib cage	1.458778e-10	3.341105e-8	1.436573e+0	4.889520e-5	3.608466e-3	1.288986e+0				HP:0003179	Protrusio acetabuli	4.410699e-8	1.010202e-5	3.427111e+0	2.507352e-1	7.979795e-1	1.404716e+0
	HP:0002813	Abnormality of limb bone morphology	2.925855e-10	6.477843e-8	1.191373e+0	5.509286e-8	6.098780e-5	1.188518e+0				HP:0005988	Congenital muscular torticollis	4.442233e-8	9.835104e-6	3.521886e+0	1.261678e-1	6.763572e-1	1.798037e+0
Mouse Phenotype	MP:0008251	abnormal phagocyte morphology	2.570875e-32	2.425106e-28	1.375375e+0	1.110398e-5	2.861854e-4	1.141584e+0			Mouse Phenotype	MP:0005023	abnormal wound healing	2.848708e-20	2.687186e-16	1.616284e+0	9.788954e-7	3.037474e-5	1.374713e+0
	MP:0008250	abnormal myeloid leukocyte morphology	4.853438e-32	2.289124e-28	1.341478e+0	4.750143e-6	1.400253e-4	1.136023e+0				MP:0002113	abnormal skeleton development	2.118617e-19	9.992457e-16	1.311832e+0	3.434536e-22	1.619899e-18	1.470563e+0
	MP:0013693	abnormal hemopoiesis	5.342603e-29	1.679892e-25	1.322400e+0	4.110493e-9	3.285956e-7	1.176060e+0				MP:0013693	abnormal hemopoiesis	1.041026e-17	3.273333e-14	1.250215e+0	4.928439e-9	3.038560e-7	1.199750e+0
	MP:0002123	abnormal definitive hematopoiesis	2.150898e-26	5.072355e-23	1.311183e+0	6.489389e-9	5.059042e-7	1.176268e+0				MP:0009250	abnormal appendicular skeleton morphology	1.595474e-17	3.762527e-14	1.244303e+0	1.543093e-19	1.323272e-16	1.361784e+0
	MP:0008248	abnormal mononuclear phagocyte morphology	1.014861e-25	1.914637e-22	1.374068e+0	1.211721e-4	2.116697e-3	1.139202e+0				MP:0002123	abnormal definitive hematopoiesis	1.002065e-16	1.890496e-13	1.246256e+0	4.655097e-9	2.927435e-7	1.203043e+0
	MP:0001533	abnormal skeleton physiology	2.209352e-25	3.473470e-22	1.332986e+0	8.131574e-15	3.196047e-12	1.286240e+0				MP:0013659	abnormal erythroid lineage cell morphology	1.723070e-16	2.708953e-13	1.260200e+0	5.392231e-6	1.321167e-4	1.163226e+0
	MP:0002933	joint inflammation	1.030051e-22	1.388067e-19	1.899743e+0	3.276749e-3	2.907768e-2	1.218394e+0				MP:0002447	abnormal erythrocyte morphology	3.081321e-16	4.152300e-13	1.268284e+0	4.156160e-6	1.051074e-4	1.171564e+0
	MP:0002006	neoplasm	2.049193e-22	2.416255e-19	1.277194e+0	1.208027e-12	2.713171e-10	1.219193e+0				MP:0003723	abnormal long bone morphology	6.634423e-16	7.822814e-13	1.258447e+0	4.736131e-18	2.351364e-15	1.387420e+0
	MP:0002993	arthritis	5.272167e-22	5.525817e-19	1.917197e+0	4.931154e-3	3.945341e-2	1.215641e+0				MP:0003009	abnormal cytokine secretion	6.893800e-16	7.225468e-13	1.309159e+0	7.754755e-4	8.636435e-3	1.135393e+0
	MP:0005023	abnormal wound healing	8.427664e-21	7.949815e-18	1.609374e+0	3.428036e-7	1.497068e-5	1.340221e+0				MP:0001533	abnormal skeleton physiology	9.181469e-16	8.660880e-13	1.260026e+0	1.407720e-14	3.404878e-12	1.325046e+0
	MP:0003009	abnormal cytokine secretion	3.668616e-20	3.146005e-17	1.346070e+0	5.676049e-2	2.217067e-1	1.060299e+0				MP:0005164	abnormal response to injury	2.871311e-15	2.462280e-12	1.303765e+0	3.519030e-9	2.388130e-7	1.269667e+0
	MP:0002166	altered tumor susceptibility	8.818595e-20	6.932151e-17	1.269512e+0	6.982832e-12	1.079821e-9	1.221658e+0				MP:0002109	abnormal limb morphology	4.107020e-15	3.228460e-12	1.213938e+0	8.858033e-19	5.968416e-16	1.333975e+0
	MP:0002446	abnormal macrophage morphology	1.833975e-19	1.330760e-16	1.373243e+0	7.562246e-5	1.429552e-3	1.170768e+0				MP:0008568	abnormal interleukin secretion	2.526614e-14	1.833350e-11	1.332279e+0	1.408137e-3	1.380765e-2	1.147870e+0
	MP:0002019	abnormal tumor incidence	2.654207e-19	1.788367e-16	1.268779e+0	5.684982e-12	9.089226e-10	1.224667e+0				MP:0004969	pale kidney	5.580324e-14	3.759943e-11	2.063923e+0	5.400307e-6	1.319718e-4	1.748092e+0
	MP:0003795	abnormal bone structure	1.124001e-18	7.068468e-16	1.238785e+0	2.025063e-14	7.074970e-12	1.242715e+0				MP:0001588	abnormal hemoglobin	1.111484e-13	6.989752e-11	1.357472e+0	2.653240e-3	2.252746e-2	1.153135e+0
	MP:0002135	abnormal kidney morphology	1.379802e-18	8.134795e-16	1.236977e+0	1.299249e-8	9.284709e-7	1.178017e+0				MP:0002596	abnormal hematocrit	1.143413e-13	6.741134e-11	1.432396e+0	3.498181e-5	6.789782e-4	1.271422e+0
	MP:0000322	increased granulocyte number	2.631046e-18	1.459921e-15	1.455938e+0	1.624875e-3	1.660612e-2	1.157006e+0				MP:0002932	abnormal joint morphology	1.323509e-13	7.343918e-11	1.317568e+0	1.333070e-16	5.239521e-14	1.496148e+0
	MP:0020201	abnormal granulocyte number	3.257270e-18	1.706990e-15	1.356168e+0	6.689222e-3	4.984157e-2	1.103913e+0				MP:0010919	increased number of pulmonary neuroendocrine bodies	2.993387e-13	1.568701e-10	5.263451e+0	8.806156e-2	2.728029e-1	2.247546e+0
	MP:0000219	increased neutrophil cell number	5.410097e-18	2.685971e-15	1.564234e+0	3.622720e-3	3.155413e-2	1.179702e+0				MP:0009885	abnormal palatal shelf elevation	4.598977e-13	2.283271e-10	1.784938e+0	4.888051e-5	8.953201e-4	1.661230e+0
	MP:0000609	abnormal liver physiology	5.929132e-18	2.796475e-15	1.411507e+0	2.350317e-3	2.219273e-2	1.134723e+0				MP:0010882	trachea hypoplasia	4.872210e-13	2.297978e-10	6.597361e+0	4.449296e-1	7.033720e-1	2.247546e+0
	MP:0011100	preweaning lethality, complete penetrance	1.229536e-17	5.522959e-15	1.281889e+0	1.112466e-5	2.859371e-4	1.143735e+0				MP:0000166	abnormal chondrocyte morphology	7.215907e-13	3.241317e-10	1.504362e+0	1.773328e-15	5.575934e-13	1.854771e+0
	MP:0002139	abnormal hepatobiliary system physiology	1.303724e-17	5.590013e-15	1.385664e+0	2.213750e-3	2.105071e-2	1.130522e+0				MP:0000163	abnormal cartilage morphology	1.104492e-12	4.735760e-10	1.262448e+0	1.972354e-21	3.721043e-18	1.524717e+0
	MP:0000130	abnormal trabecular bone morphology	1.945866e-17	7.980589e-15	1.413961e+0	9.426320e-8	5.139796e-6	1.294972e+0				MP:0002640	reticulocytosis	1.275941e-12	5.233022e-10	1.812416e+0	1.200796e-3	1.225878e-2	1.357893e+0
	MP:0020202	abnormal macrophage cell number	2.603013e-17	1.023093e-14	1.435200e+0	1.643303e-4	2.719522e-3	1.207371e+0				MP:0008251	abnormal phagocyte morphology	1.332941e-12	5.239014e-10	1.224352e+0	1.488159e-8	7.976025e-7	1.210422e+0
	MP:0013659	abnormal erythroid lineage cell morphology	2.840068e-17	1.071614e-14	1.260572e+0	1.971476e-6	6.713694e-5	1.150170e+0				MP:0000558	abnormal tibia morphology	1.387671e-12	5.235960e-10	1.367301e+0	4.843517e-9	3.005848e-7	1.410404e+0
	MP:0012440	abnormal neutrophil cell number	3.314827e-17	1.202645e-14	1.453615e+0	8.951210e-2	2.925737e-1	1.072611e+0				MP:0008250	abnormal myeloid leukocyte morphology	1.447808e-12	5.252759e-10	1.205076e+0	6.131839e-9	3.637839e-7	1.198995e+0
	MP:0001798	impaired macrophage phagocytosis	3.798037e-17	1.326922e-14	2.200096e+0	9.328738e-4	1.089084e-2	1.399512e+0				MP:0000164	abnormal cartilage development	1.508585e-12	5.270549e-10	1.355573e+0	1.912585e-18	1.127588e-15	1.659403e+0
	MP:0001844	autoimmune response	5.579746e-17	1.879777e-14	1.411855e+0	1.003832e-1	3.124100e-1	1.062943e+0				MP:0002444	abnormal T cell physiology	1.539109e-12	5.185148e-10	1.262039e+0	1.047954e-5	2.348064e-4	1.182390e+0
	MP:0005502	abnormal renal/urinary system physiology	1.926460e-16	6.266309e-14	1.267640e+0	3.937639e-5	8.199503e-4	1.141848e+0				MP:0010171	abnormal centroacinar cell of Langerhans morphology	1.906848e-12	6.202516e-10	5.238174e+0	4.177241e-1	6.967978e-1	1.498364e+0
	MP:0000516	abnormal renal/urinary system morphology	2.085404e-16	6.557205e-14	1.207273e+0	1.865465e-9	1.629345e-7	1.180040e+0				MP:0006395	abnormal epiphyseal plate morphology	2.846242e-12	8.949534e-10	1.360773e+0	1.337925e-14	3.321223e-12	1.564371e+0

## Sheet: supplementary file 3d
		Rank	P-value	log P-pvalue	% of Targets	% of Background	STD(Bg STD)	Best Match/Details	DEG in all RNA-seq samples	Direction across all samples	DEG in Batch 2 RNA-seq	Direction
	1	1	1e-1443	-3.324e+03	34.43%	6.74%	64.4bp (106.9bp)	AP-1(bZIP)/ThioMac-PU.1-ChIP-Seq(GSE21512)/Homer(0.961)	not captured	n/a	n/a	n/a
	2	2	1e-1018	-2.346e+03	55.92%	24.79%	71.0bp (109.5bp)	ZNF416(Zf)/HEK293-ZNF416.GFP-ChIP-Seq(GSE58341)/Homer(0.732)	no	n/a	quality drop-out	n/a
	3	3	1e-955	-2.201e+03	50.15%	21.01%	67.4bp (109.5bp)	RUNX1/MA0002.2/Jaspar(0.902)	yes	TGF	yes	TGF
	4	4	1e-856	-1.972e+03	38.87%	14.03%	67.3bp (104.6bp)	FOXA1(Forkhead)/LNCAP-FOXA1-ChIP-Seq(GSE27824)/Homer(0.948)	yes	TGF	quality drop-out	n/a
	5	5	1e-850	-1.959e+03	46.08%	19.25%	69.5bp (109.9bp)	Fosl2(bZIP)/3T3L1-Fosl2-ChIP-Seq(GSE56872)/Homer(0.596)	yes	BMP	yes	BMP
	6	6	1e-714	-1.645e+03	45.77%	20.89%	72.0bp (111.1bp)	POL009.1_DCE_S_II/Jaspar(0.664)	not captured	na	na	na
	7	7	1e-664	-1.531e+03	58.98%	32.97%	71.4bp (110.8bp)	POL009.1_DCE_S_II/Jaspar(0.651)	not captured	na	na	na
	8	8	1e-497	-1.145e+03	43.53%	22.65%	66.8bp (108.0bp)	Chop(bZIP)/MEF-Chop-ChIP-Seq(GSE35681)/Homer(0.885)	not captured	na	na	na
	9	9	1e-407	-9.380e+02	40.65%	22.00%	66.5bp (102.8bp)	MF0005.1_Forkhead_class/Jaspar(0.604)	not captured	na	na	na
	10	10	1e-400	-9.222e+02	35.25%	17.81%	72.4bp (107.1bp)	MyoD(bHLH)/Myotube-MyoD-ChIP-Seq(GSE21614)/Homer(0.748)	missing read dropout	na	na	na
	11	11	1e-398	-9.177e+02	12.01%	2.70%	64.5bp (93.7bp)	Sp1(Zf)/Promoter/Homer(0.969)	not captured	na	na	na
	12	12	1e-397	-9.150e+02	10.27%	1.93%	61.4bp (108.0bp)	PB0182.1_Srf_2/Jaspar(0.840)	no	na	quality drop-out	n/a
	13	13	1e-311	-7.174e+02	25.56%	12.10%	67.2bp (100.1bp)	CHR(?)/Hela-CellCycle-Expression/Homer(0.690)	not captured	na	na	na
	14	14	1e-293	-6.758e+02	4.47%	0.34%	58.3bp (80.6bp)	NRF1(NRF)/MCF7-NRF1-ChIP-Seq(Unpublished)/Homer(0.977)	no	na	quality drop-out	n/a
	15	15	1e-256	-5.913e+02	11.82%	3.82%	65.2bp (104.3bp)	PB0165.1_Sox11_2/Jaspar(0.703)	yes	TGF	yes	TGF
	16	16	1e-235	-5.432e+02	2.46%	0.05%	79.0bp (121.9bp)	GLIS3(Zf)/Thyroid-Glis3.GFP-ChIP-Seq(GSE103297)/Homer(0.680)	no	na	quality drop-out	n/a
	17	17	1e-215	-4.963e+02	2.70%	0.12%	77.8bp (81.4bp)	PITX2/MA1547.1/Jaspar(0.705)	yes	BMP	quality drop-out	n/a
	18	18	1e-168	-3.869e+02	2.76%	0.25%	77.1bp (110.4bp)	Ddit3::Cebpa/MA0019.1/Jaspar(0.725)	no	na	quality drop-out	n/a
	19	19	1e-124	-2.877e+02	1.37%	0.04%	82.6bp (90.5bp)	Sp5(Zf)/mES-Sp5.Flag-ChIP-Seq(GSE72989)/Homer(0.674)	missing read dropout	na	na	na
	20	20	1e-44	-1.030e+02	0.65%	0.05%	70.1bp (100.5bp)	MAFF/MA0495.3/Jaspar(0.675)	no	na	yes	TGF
	21	21	1e-43	-9.996e+01	0.54%	0.02%	67.8bp (61.0bp)	BMYB(HTH)/Hela-BMYB-ChIP-Seq(GSE27030)/Homer(0.662)	not captured	na	na	na
	22	22	1e-32	-7.462e+01	0.42%	0.02%	61.9bp (54.3bp)	PB0195.1_Zbtb3_2/Jaspar(0.647)	no	na	na	na
	23	23	1e-30	-6.950e+01	0.38%	0.02%	81.5bp (37.1bp)	Smad4/MA1153.1/Jaspar(0.734)	no	na	yes	BMP
	24	24 *	1e-2	-5.691e+00	0.03%	0.00%	67.8bp (81.0bp)	CRX(Homeobox)/Retina-Crx-ChIP-Seq(GSE20012)/Homer(0.585)	no	na	quality drop-out	n/a

## Sheet: supplementary file 3e
		Rank	P-value	log P-pvalue	% of Targets	% of Background	STD(Bg STD)	Best Match/Details	DEG in all RNA-seq samples	Direction across all samples	DEG in Batch 2 RNA-seq	Direction
	1	1	1e-2962	-6.822e+03	52.41%	7.13%	55.2bp (104.3bp)	BATF/MA1634.1/Jaspar(0.981)	no	n/a	no	n/a
	2	2	1e-1070	-2.466e+03	63.73%	30.06%	71.5bp (112.5bp)	PBX3/MA1114.1/Jaspar(0.627)	no	n/a	quality drop-out	n/a
	3	3	1e-1016	-2.339e+03	44.41%	15.54%	69.0bp (113.4bp)	ETV4/MA0764.2/Jaspar(0.912)	yes	TGF	quality drop-out	n/a
	4	4	1e-827	-1.906e+03	58.49%	29.11%	71.3bp (113.5bp)	Ap4(bHLH)/AML-Tfap4-ChIP-Seq(GSE45738)/Homer(0.770)	yes	TGF	yes	TGF
	5	5	1e-774	-1.783e+03	58.20%	29.72%	70.4bp (110.2bp)	ZNF416(Zf)/HEK293-ZNF416.GFP-ChIP-Seq(GSE58341)/Homer(0.772)	no	n/a	quality drop-out	n/a
	6	6	1e-697	-1.605e+03	62.00%	34.56%	67.9bp (110.3bp)	MAZ/MA1522.1/Jaspar(0.876)	no	n/a	quality drop-out	n/a
	7	7	1e-673	-1.550e+03	59.39%	32.59%	71.5bp (110.3bp)	Smad3(MAD)/NPC-Smad3-ChIP-Seq(GSE36673)/Homer(0.733)	not captured	n/a	quality drop-out	n/a
	8	8	1e-640	-1.474e+03	62.20%	35.84%	70.0bp (114.6bp)	SA0001.1_at_AC_acceptor/Jaspar(0.595)	not captured	n/a	n/a	n/a
	9	9	1e-558	-1.285e+03	40.52%	18.75%	68.3bp (108.4bp)	X-box(HTH)/NPC-H3K4me1-ChIP-Seq(GSE16256)/Homer(0.745)	not captured	n/a	n/a	n/a
	10	10	1e-524	-1.207e+03	68.05%	44.13%	70.2bp (110.6bp)	Smad3(MAD)/NPC-Smad3-ChIP-Seq(GSE36673)/Homer(0.706)	not captured	n/a	n/a	n/a
	11	11	1e-447	-1.031e+03	39.46%	19.85%	70.4bp (107.5bp)	POL013.1_MED-1/Jaspar(0.761)	not captured	n/a	n/a	n/a
	12	12	1e-429	-9.893e+02	49.36%	28.52%	70.6bp (98.7bp)	NFAT5/MA0606.1/Jaspar(0.769)	yes	BMP	yes	BMP
	13	13	1e-302	-6.963e+02	47.56%	30.03%	71.2bp (105.7bp)	NHLH1/MA0048.2/Jaspar(0.811)	yes	BMP	quality drop-out	n/a
	14	14	1e-221	-5.099e+02	16.31%	6.93%	70.4bp (102.3bp)	PB0130.1_Gm397_2/Jaspar(0.711)	not captured	n/a	n/a	n/a
	15	15	1e-219	-5.059e+02	26.00%	14.03%	72.5bp (101.8bp)	CHR(?)/Hela-CellCycle-Expression/Homer(0.715)	not captured	n/a	n/a	n/a
	16	16	1e-206	-4.744e+02	9.04%	2.69%	65.4bp (103.3bp)	Atf2(bZIP)/3T3L1-Atf2-ChIP-Seq(GSE56872)/Homer(0.958)	no	n/a	quality drop-out	n/a
	17	17	1e-195	-4.493e+02	5.24%	0.95%	51.1bp (101.4bp)	NFY(CCAAT)/Promoter/Homer(0.967)	yes	TGF	yes	TGF
	18	18	1e-165	-3.821e+02	12.18%	5.10%	68.9bp (101.0bp)	ZNF24/MA1124.1/Jaspar(0.900)	no	n/a	yes	TGF
	19	19	1e-131	-3.021e+02	1.58%	0.05%	61.8bp (100.0bp)	GFY(?)/Promoter/Homer(0.985)	not captured	n/a	n/a	n/a
	20	20	1e-79	-1.832e+02	11.90%	6.71%	65.7bp (81.0bp)	Sp1(Zf)/Promoter/Homer(0.726)	not captured	n/a	n/a	n/a
	21	21	1e-52	-1.208e+02	0.70%	0.03%	63.5bp (82.8bp)	YY1(Zf)/Promoter/Homer(0.992)	no	n/a	yes	BMP
	22	22	1e-49	-1.142e+02	1.12%	0.16%	51.6bp (95.9bp)	NRF1(NRF)/MCF7-NRF1-ChIP-Seq(Unpublished)/Homer(0.942)	no	n/a	quality drop-out	n/a
	23	23	1e-41	-9.564e+01	0.50%	0.02%	79.3bp (75.3bp)	GLIS3(Zf)/Thyroid-Glis3.GFP-ChIP-Seq(GSE103297)/Homer(0.696)	no	n/a	quality drop-out	n/a
	24	24	1e-32	-7.512e+01	0.39%	0.01%	76.9bp (54.3bp)	PB0091.1_Zbtb3_1/Jaspar(0.817)	no	n/a	quality drop-out	n/a

## Sheet: supplementary file 3f
Targeted motif testing – growth plate chondrocyte DA peaks									Targeted motif testing – articular chondrocyte DA peaks
TF	DIR	stand_p	Z	target_HITS	mean_back	SD_back	padj		TF	DIR	stand_p	Z	target_HITS	mean_back	SD_back	padj
TFAP4(var.2)	ENRICH	1.99623e-109	-22.1932	949	374.26	25.8971	4.19209e-109		TFAP4(var.2)	ENRICH	3.90373e-15	-7.77067	656	446.12	27.0093	5.94047e-15
SOX8	ENRICH	2.8975e-80	-18.9357	585	276.01	16.3179	5.15657e-80		SOX8	ENRICH	4.10013e-08	-5.36267	377	285.88	16.9915	5.44954e-08
DLX6	ENRICH	0	-62.5515	841	160.77	10.8747	0		DLX6	ENRICH	1.8976e-31	-11.607	363	190.79	14.8367	3.8317e-31
RUNX3	ENRICH	0	-53.442	2305	680.25	30.4021	0		RUNX3	DEPLETE	0.107141	1.24188	875	912.03	29.8178	0.113063
HLTF	ENRICH	0	-59.7367	1027	211.28	13.6553	0		HLTF	ENRICH	5.1978e-173	-28.0159	642	220.68	15.0386	2.66229e-172
RFX3	DEPLETE	0.0272796	1.92237	856	945.48	46.5467	0.0290798		RFX3	ENRICH	7.58084e-53	-15.2554	1331	739.72	38.7588	1.87291e-52
MEF2C	ENRICH	0	-122.45	4752	878.18	31.636	0		MEF2C	ENRICH	4.56611e-187	-29.1469	2140	1190.8	32.566	2.45867e-186
NFE2L1	ENRICH	2.90373e-149	-25.9939	2895	1780.1	42.8909	7.25934e-149		NFE2L1	ENRICH	0	-63.8672	4062	1433.93	41.149	0
YY1	DEPLETE	2.01977e-07	5.06708	785	919.65	26.5735	2.3305e-07		YY1	DEPLETE	3.91466e-08	5.37102	759	919.49	29.8807	5.23616e-08
KLF5	DEPLETE	7.03954e-220	31.6305	4080	8602.04	142.965	2.20642e-219		KLF5	DEPLETE	3.04929e-187	29.1608	4181	7846.44	125.698	1.68513e-186
NFAT5	ENRICH	3.22423e-269	-35.0357	2178	1093.85	30.9442	1.16739e-268		NFAT5	ENRICH	0	-39.4705	2332	997.42	33.8121	0
DLX5	ENRICH	0	-39.443	742	188.09	14.0433	0		DLX5	ENRICH	0.00101237	-3.08658	283	232.19	16.4616	0.00117457
PITX3	ENRICH	7.20248e-36	-12.4476	496	270.74	18.0966	1.05036e-35		PITX3	ENRICH	1.5629e-27	-10.8088	434	271.7	15.0155	3.0111e-27
HOXB6	ENRICH	0	-51.4812	850	181.26	12.99	0		HOXB6	ENRICH	1.1669e-31	-11.6486	389	211.64	15.2259	2.40244e-31
NKX3	ENRICH	3.13863e-57	-15.9006	697	368.77	20.6426	5.14932e-57		NKX3	ENRICH	7.94882e-14	-7.37942	509	368.42	19.0503	1.19232e-13
E2F3	DEPLETE	0	44.5586	1203	6265.87	113.623	0		E2F3	DEPLETE	2.89477e-206	30.6244	2147	5065.84	95.3108	1.89969e-205
TBX18	DEPLETE	1.18087e-11	6.68171	871	1090.94	32.9167	1.40899e-11		TBX18	DEPLETE	0.000100679	3.71731	872	999.91	34.4093	0.000120129
NR3C1	ENRICH	2.22528e-120	-23.2998	1121	487.07	27.2075	4.91905e-120		NR3C1	ENRICH	7.64756e-47	-14.3249	807	519.06	20.1007	1.80448e-46
STAT1	ENRICH	2.95346e-57	-15.9044	2062	1351.6	44.6669	4.88368e-57		STAT1	ENRICH	2.2324e-28	-10.986	1750	1290.66	41.8116	4.38135e-28
STAT1::STAT2	ENRICH	0	-37.8452	3019	1428.73	42.0204	0		STAT1::STAT2	ENRICH	6.86215e-126	-23.8373	2423	1379.73	43.7663	2.77125e-125
Dlx2	ENRICH	0	-66.8411	1096	151.99	14.1232	0		Dlx2	ENRICH	9.1594e-25	-10.2077	376	207.84	16.4739	1.58965e-24
VAX2	ENRICH	0	-45.7958	842	173.33	14.6011	0		VAX2	ENRICH	5.34425e-55	-15.5755	477	212.89	16.9568	1.36865e-54
PRRX1	ENRICH	2.10163e-267	-34.9163	701	171.88	15.1539	7.48038e-267		PRRX1	ENRICH	5.07632e-41	-13.3615	386	188.13	14.809	1.14627e-40
MEF2D	ENRICH	0	-107.077	3061	537.48	23.5674	0		MEF2D	ENRICH	2.06702e-116	-22.9051	1406	750.71	28.6089	7.89227e-116
TFAP2E	DEPLETE	3.11346e-299	36.9542	837	5306.25	120.94	1.18877e-298		TFAP2E	DEPLETE	2.86231e-212	31.0722	985	4522.64	113.852	2.07271e-211
IRF6	DEPLETE	0.0593706	1.56008	172	194.35	14.3262	0.0623391		IRF6	ENRICH	0.158607	-1.0002	182	168.68	13.3173	0.164888
ATF6	DEPLETE	2.54767e-11	6.56812	413	591.51	27.1782	3.00567e-11		ATF6	DEPLETE	0.0588283	1.56469	496	535.24	25.0785	0.0630303
CREB1	ENRICH	9.4228e-88	-19.823	1699	973.64	36.5918	1.76677e-87		CREB1	ENRICH	2.83016e-61	-16.4738	1540	963.18	35.0144	7.82017e-61
ONECUT2	ENRICH	0	-62.2943	929	157.7	12.3816	0		ONECUT2	ENRICH	8.85565e-166	-27.4159	557	178.71	13.7982	4.42782e-165
MXI1	DEPLETE	3.91483e-63	16.7307	450	1184.92	43.9264	6.62996e-63		MXI1	DEPLETE	5.0149e-65	16.9883	385	1117.34	43.1086	1.40417e-64
HOXB8	ENRICH	1.88491e-235	-32.7434	704	213.83	14.97	6.18485e-235		HOXB8	ENRICH	2.61976e-25	-10.3285	389	232.06	15.1949	4.74267e-25
HOXB5	ENRICH	0	-64.7966	997	123.42	13.4819	0		HOXB5	ENRICH	4.05748e-25	-10.2864	356	174.4	17.6544	7.10059e-25
ELF1	DEPLETE	8.60922e-58	15.9814	1775	2573.59	49.9699	1.43487e-57		ELF1	ENRICH	1.60848e-49	-14.747	2746	2092.8	44.2938	3.83842e-49
TBX2	ENRICH	1.42578e-19	-8.9743	695	486.13	23.2742	1.82569e-19		TBX2	ENRICH	1.94464e-11	-6.60824	615	474.24	21.3007	2.75929e-11
TBX20	ENRICH	8.73866e-41	-13.321	779	505.19	20.5548	1.32023e-40		TBX20	ENRICH	3.18118e-21	-9.38382	674	489.1	19.7041	5.30196e-21
SNAI1	DEPLETE	1.8338e-67	17.3143	362	913.83	31.8713	3.13088e-67		SNAI1	DEPLETE	1.1729e-40	13.299	420	803.89	28.8661	2.62031e-40
RREB1	DEPLETE	1.84649e-20	9.19665	3563	5050.88	161.785	2.37891e-20		RREB1	DEPLETE	5.20037e-60	16.2968	2072	5121.59	187.128	1.41828e-59
RUNX2	ENRICH	0	-47.8168	3488	1517.49	41.2096	0		RUNX2	DEPLETE	8.35106e-26	10.4376	1422	1923.89	48.0849	1.55197e-25
SOX9	ENRICH	2.38816e-49	-14.7203	432	227.51	13.8917	3.71492e-49		SOX9	ENRICH	0.0547118	-1.60079	272	244.9	16.9291	0.0592241
FOXA2	ENRICH	0	-141.061	4009	487.91	24.9614	0		FOXA2	ENRICH	1.89452e-07	-5.07926	1039	881.6	30.9888	2.45586e-07
ELK1	DEPLETE	5.69871e-46	14.1847	587	1199.22	43.1606	8.79948e-46		ELK1	DEPLETE	6.03638e-26	10.4684	689	1084.13	37.7452	1.13182e-25
KLF2	DEPLETE	1.71433e-186	29.1016	2773	6784.95	137.86	4.93164e-186		KLF2	DEPLETE	4.57018e-259	34.3626	2441	6225.19	110.125	4.17277e-258
PPARG	DEPLETE	0.251096	0.671044	737	757.37	30.3557	0.257221		PPARG	ENRICH	0.25782	-0.65008	708	687.15	32.073	0.264108
GRHL1	ENRICH	1.25127e-83	-19.3394	686	277.97	21.0984	2.26523e-83		GRHL1	ENRICH	0.000197221	-3.54377	408	316.35	25.8623	0.000232676
CLOCK	ENRICH	0.390251	-0.278664	458	449.99	28.7443	0.392118		CLOCK	DEPLETE	3.29613e-09	5.80099	301	466.41	28.5141	4.46572e-09
TBX3	DEPLETE	1.30485e-06	4.69937	724	857.55	28.4187	1.48923e-06		TBX3	DEPLETE	2.3878e-06	4.57441	698	818.39	26.3181	3.00262e-06
HEY2	DEPLETE	5.64751e-31	11.5134	368	797.47	37.3018	8.01336e-31		HEY2	DEPLETE	1.03032e-54	15.5334	234	792.23	35.9373	2.60683e-54
MYC	DEPLETE	3.99243e-78	18.6745	474	1275.43	42.9158	6.98675e-78		MYC	DEPLETE	1.18354e-82	19.2232	380	1177.43	41.4827	3.94513e-82
FOXF2	ENRICH	0	-125.291	3174	428.64	21.9119	0		FOXF2	ENRICH	2.907e-23	-9.86653	930	682.1	25.1253	5.00384e-23
ZSCAN29	DEPLETE	3.07821e-06	4.52095	273	355.38	18.2219	3.4754e-06		ZSCAN29	DEPLETE	1.57947e-06	4.66021	248	332.25	18.0786	1.99812e-06
GATA6	ENRICH	1.15648e-99	-21.1583	569	209.08	17.0108	2.35787e-99		GATA6	ENRICH	1.47774e-17	-8.44831	358	215	16.9265	2.2987e-17
OSR1	DEPLETE	0.243925	0.693732	498	513.08	21.7375	0.251099		OSR1	DEPLETE	9.47339e-06	4.27695	402	509.88	25.2236	1.17024e-05
NR1I2	DEPLETE	1.28189e-24	10.175	497	802.71	30.0452	1.72561e-24		NR1I2	DEPLETE	5.01998e-58	16.015	315	757.25	27.6147	1.33442e-57
ZNF711	DEPLETE	1.40684e-172	27.9804	716	1921.4	43.0801	3.7397e-172		ZNF711	DEPLETE	6.16398e-123	23.5508	738	1727.81	42.0288	2.44233e-122
HOXB13	ENRICH	0	-97.1966	2864	544.86	23.8603	0		HOXB13	ENRICH	0	-45.2108	1820	593.34	27.132	0
ISL2	ENRICH	9.51388e-31	-11.4683	509	294.55	18.6993	1.32312e-30		ISL2	ENRICH	1.97946e-05	-4.10986	374	301.51	17.6381	2.41678e-05
ZBTB7B	DEPLETE	3.50194e-120	23.2804	244	1149.55	38.8975	7.66049e-120		ZBTB7B	DEPLETE	1.96911e-117	23.0073	230	996.9	33.3329	7.65765e-117
GFI1	ENRICH	5.97432e-46	-14.1814	994	609.52	27.1116	9.15772e-46		GFI1	ENRICH	5.42818e-42	-13.5269	867	586.9	20.7069	1.23904e-41
EN1	ENRICH	1.6794e-284	-36.0253	657	185.44	13.0897	6.18726e-284		EN1	ENRICH	4.3221e-07	-4.92023	297	213.52	16.9667	5.53439e-07
MSX1	ENRICH	2.02904e-53	-15.3412	406	215.72	12.4032	3.27769e-53		MSX1	ENRICH	0.00156791	-2.9541	282	235.79	15.6427	0.00179924
HAND2	DEPLETE	0.000371612	3.37312	851	955.42	30.9565	0.000408578		HAND2	ENRICH	0.0271879	-1.92383	922	863.58	30.3665	0.0297368
EBF1	DEPLETE	1.72563e-111	22.4059	1418	3116.03	75.7851	3.66042e-111		EBF1	DEPLETE	1.82689e-135	24.7434	1108	2867.17	71.0966	7.67295e-135
HEY1	DEPLETE	3.57615e-38	12.8643	360	839.57	37.2793	5.28867e-38		HEY1	DEPLETE	2.25027e-55	15.6307	223	828.55	38.7411	5.83403e-55
OSR2	DEPLETE	0.298153	0.52972	1406	1425.93	37.6237	0.302474		OSR2	DEPLETE	6.09356e-07	4.85257	1209	1370.24	33.2277	7.75544e-07
ZNF528	DEPLETE	1.54581e-21	9.45959	1056	1461.21	42.8359	2.00383e-21		ZNF528	DEPLETE	4.82782e-12	6.81154	1120	1338.85	32.1293	6.94412e-12
ZEB2	DEPLETE	1.05036e-78	18.7457	539	1147.75	32.4742	1.85358e-78		ZEB2	DEPLETE	1.39825e-42	13.6262	547	1031.03	35.5219	3.22673e-42
EMX2	ENRICH	0	-41.7141	773	151.11	14.9084	0		EMX2	ENRICH	5.59955e-18	-8.5609	327	184.01	16.7027	8.77541e-18
ZNF274	ENRICH	2.97846e-08	-5.42009	797	663.13	24.6989	3.45568e-08		ZNF274	ENRICH	0.00654028	-2.48157	691	632.32	23.6463	0.00730563
CEBPB	ENRICH	0	-91.999	2216	440.09	19.3036	0		CEBPB	DEPLETE	0.00416788	2.63816	680	766.54	32.8032	0.00473111
ZNF24	ENRICH	9.52745e-182	-28.7242	2161	925.78	43.0028	2.66768e-181		ZNF24	ENRICH	7.47246e-206	-30.5935	2010	878.21	36.9945	4.7552e-205
ESRRA	ENRICH	0.000139876	-3.63336	864	770.95	25.6099	0.000154599		ESRRA	DEPLETE	5.39786e-09	5.71773	631	786.78	27.2451	7.26635e-09
GLIS1	DEPLETE	4.51778e-108	22.0525	195	845.31	29.4892	9.39341e-108		GLIS1	DEPLETE	5.47661e-67	17.2512	229	731.79	29.1452	1.59734e-66
ZFP42	DEPLETE	1.08244e-15	7.93152	834	1095.09	32.918	1.35305e-15		ZFP42	DEPLETE	1.62627e-10	6.28624	808	990.5	29.0317	2.29206e-10
GATA2	ENRICH	2.33022e-28	-10.9821	419	233.47	16.8939	3.15707e-28		GATA2	ENRICH	0.486157	-0.0347061	239	238.46	15.5592	0.486157
EGR3	DEPLETE	0	43.3943	883	4596.61	85.5782	0		EGR3	DEPLETE	1.37349e-221	31.7546	990	4011.21	95.1426	1.06827e-220
MAFA	DEPLETE	1.61662e-06	4.65542	1339	1609.85	58.1795	1.83508e-06		MAFA	ENRICH	0.111038	-1.22103	1480	1417.72	51.0063	0.11659
FOXO4	ENRICH	0	-109.301	2737	356.59	21.7785	0		FOXO4	ENRICH	1.97004e-10	-6.25638	787	641.26	23.2946	2.73979e-10
POU3F1	ENRICH	0	-70.6353	1853	426.41	20.1966	0		POU3F1	ENRICH	4.74827e-298	-36.8805	1315	454.34	23.3365	5.8655e-297
TEAD1	ENRICH	4.56618e-114	-22.6687	1733	950.3	34.5278	9.88554e-114		TEAD1	ENRICH	2.74144e-25	-10.3241	1371	1004.75	35.4752	4.92054e-25
ZNF675.GFP	ENRICH	4.41201e-29	-11.1314	1106	813.2	26.304	6.0557e-29		ZNF675.GFP	ENRICH	5.43767e-10	-6.096	936	759.35	28.978	7.51257e-10
ZNF460	DEPLETE	0	54.1993	2426	9805.81	136.161	0		ZNF460	DEPLETE	0	43.9731	2596	8551.72	135.44	0
SREBF2	DEPLETE	0.213434	0.794564	762	786.46	30.7842	0.220793		SREBF2	ENRICH	0.0567464	-1.58269	789	743.88	28.5085	0.0611115
SOX18	ENRICH	8.84005e-05	-3.75005	343	282.51	16.1305	9.82228e-05		SOX18	DEPLETE	0.000418961	3.33995	240	296.77	16.9972	0.000491519
ZBED1	ENRICH	0.0427621	-1.7195	119	97.19	12.684	0.0451259		ZBED1	DEPLETE	0.112231	1.21475	81	95.48	11.9202	0.117256
HOXA10	ENRICH	0	-52.2499	1516	397.35	21.4096	0		HOXA10	ENRICH	3.36852e-208	-30.7694	1133	432.93	22.7522	2.35797e-207
ETV1	DEPLETE	3.78554e-38	12.8599	1839	2429.76	45.9383	5.55918e-38		ETV1	ENRICH	2.43355e-138	-25.0091	3023	1947.34	43.0107	1.06468e-137
TEAD3	ENRICH	8.97638e-90	-20.0558	1224	687.91	26.7299	1.71367e-89		TEAD3	ENRICH	5.37563e-08	-5.31355	911	751.39	30.0383	7.09989e-08
POU2F2	ENRICH	0	-56.2047	1819	526.54	22.9956	0		POU2F2	ENRICH	4.78646e-143	-25.438	1274	569.49	27.6951	2.13863e-142
BARX2	ENRICH	0	-66.7242	1315	255.96	15.8719	0		BARX2	ENRICH	0	-40.7663	934	263.66	16.4435	0
MSANTD3	DEPLETE	4.08118e-12	6.83567	746	969.08	32.6347	5.01198e-12		MSANTD3	DEPLETE	0.263659	0.632106	831	851.02	31.6719	0.268779
MEF2A	ENRICH	0	-145.644	5159	855.79	29.5462	0		MEF2A	ENRICH	0	-42.1653	2466	1161.82	30.9302	0
TFE3	ENRICH	0.195748	-0.856909	695	667.97	31.5436	0.2035		TFE3	DEPLETE	3.35882e-31	11.5581	370	730.52	31.192	6.71764e-31
MNT	DEPLETE	1.98395e-18	8.67971	362	617.38	29.4227	2.52503e-18		MNT	DEPLETE	5.87784e-39	13.0031	214	631.1	32.0771	1.27252e-38
TCF3	DEPLETE	0	40.6668	432	2614.03	53.6563	0		TCF3	DEPLETE	5.60715e-239	32.9902	538	2305.3	53.5704	4.90626e-238
GLI2	DEPLETE	3.88204e-125	23.7646	654	1866.05	51.0024	9.15987e-125		GLI2	DEPLETE	1.24006e-137	24.944	623	1699.93	43.1739	5.31456e-137
TEAD2	ENRICH	9.06289e-125	-23.729	1700	961.72	31.113	2.11467e-124		TEAD2	ENRICH	5.08329e-21	-9.33429	1293	1006.41	30.7029	8.40543e-21
NFKB2	DEPLETE	2.7258e-68	17.4237	494	1626.52	64.9988	4.69195e-68		NFKB2	DEPLETE	6.86104e-22	9.54416	816	1337.87	54.6795	1.16195e-21
RFX2	DEPLETE	9.03894e-31	11.4728	942	1482.61	47.1211	1.26545e-30		RFX2	ENRICH	1.19955e-07	-5.16541	1462	1226.52	45.5879	1.56464e-07
MZF1	DEPLETE	1.06161e-28	11.0529	559	887.4	29.7117	1.44765e-28		MZF1	DEPLETE	1.03574e-05	4.25704	659	767.34	25.4496	1.27196e-05
XBP1	DEPLETE	0.0266384	1.93267	354	391.71	19.5119	0.0285412		XBP1	ENRICH	0.0104799	-2.30871	398	353.4	19.3182	0.0115224
HIF1A	DEPLETE	5.81727e-24	10.0267	196	412.23	21.5654	7.68319e-24		HIF1A	DEPLETE	4.78172e-26	10.4904	132	413.03	26.7893	9.0465e-26
NFATC4	ENRICH	2.28038e-88	-19.8943	1410	804.74	30.4238	4.31423e-88		NFATC4	ENRICH	2.12739e-265	-34.7839	1680	730.42	27.2994	2.03069e-264
MYBL2	ENRICH	0.00109682	-3.06268	181	131.62	16.1231	0.00118728		MYBL2	ENRICH	0.477225	-0.0571187	126	125.25	13.1306	0.479509
NFATC2	ENRICH	0	-39.8863	2267	1073.07	29.9333	0		NFATC2	ENRICH	0	-48.8838	2658	990.03	34.1211	0
E2F1	DEPLETE	2.40561e-24	10.1135	156	453.43	29.4091	3.19734e-24		E2F1	DEPLETE	2.03696e-19	8.93494	166	438.3	30.4759	3.26536e-19
HSF4	ENRICH	1.31948e-24	-10.1722	707	479.31	22.3836	1.76491e-24		HSF4	ENRICH	4.25485e-17	-8.32393	632	438.55	23.2402	6.56999e-17
RELB	DEPLETE	3.38796e-51	15.0053	572	1047.66	31.6994	5.38993e-51		RELB	DEPLETE	0.00506927	2.57107	782	855.85	28.7235	0.00569276
DBP	ENRICH	0	-51.639	1044	198.46	16.374	0		DBP	ENRICH	2.64213e-59	-16.1971	560	245.87	19.3942	7.11344e-59
ERF	DEPLETE	1.16924e-22	9.72589	678	966.84	29.698	1.5251e-22		ERF	ENRICH	1.77816e-09	-5.90361	987	814.72	29.1821	2.44061e-09
MEOX2	ENRICH	0	-78.084	1190	187.77	12.8353	0		MEOX2	ENRICH	4.69163e-73	-18.0404	550	245.76	16.8644	1.44889e-72
GLI3	DEPLETE	6.59948e-152	26.2267	641	1999.7	51.8061	1.66975e-151		GLI3	DEPLETE	2.43745e-190	29.404	600	1847.2	42.4159	1.42184e-189
HLF	ENRICH	0	-75.7717	1517	285.39	16.2542	0		HLF	ENRICH	1.31814e-49	-14.7604	670	385.19	19.2955	3.18172e-49
NFKB1	DEPLETE	2.765e-30	11.3756	1026	1553.81	46.3983	3.82007e-30		NFKB1	ENRICH	7.96562e-19	-8.7829	1614	1279.58	38.0763	1.25773e-18
ELF2	DEPLETE	2.70191e-16	8.10206	759	1067.93	38.1298	3.39762e-16		ELF2	DEPLETE	3.62307e-05	3.96806	854	968.44	28.8403	4.37267e-05
PRDM4	ENRICH	9.76393e-122	-23.4334	1783	1005.65	33.1728	2.1813e-121		PRDM4	ENRICH	7.88388e-36	-12.4404	1425	987.86	35.1387	1.6894e-35
ELK3	DEPLETE	1.20381e-34	12.2208	605	1035.56	35.2318	1.73151e-34		ELK3	DEPLETE	5.46943e-13	7.11815	699	925.52	31.8229	7.92124e-13
FOXM1	ENRICH	0	-152.862	5095	682.06	28.8689	0		FOXM1	ENRICH	1.65052e-25	-10.3727	1439	1103.07	32.386	3.01399e-25
PPARD	ENRICH	0.0396296	-1.755	740	697.28	24.3419	0.0420314		PPARD	DEPLETE	2.16188e-13	7.24502	478	702.33	30.9633	3.17479e-13
BACH2	ENRICH	5.82865e-167	-27.5149	4178	2398.26	64.6829	1.53002e-166		BACH2	ENRICH	0	-67.7127	6132	1898.91	62.5155	0
TFEB	ENRICH	2.18784e-05	-4.08669	888	741.91	35.7477	2.44386e-05		TFEB	DEPLETE	5.48852e-19	8.82468	509	817.23	34.9282	8.73174e-19
BCL6	ENRICH	6.27039e-24	-10.0193	827	553.85	27.2624	8.22989e-24		BCL6	ENRICH	1.06002e-19	-9.00688	744	526.1	24.1926	1.71233e-19
HES1	DEPLETE	1.55853e-135	24.7498	401	1887.39	60.0567	3.76196e-135		HES1	DEPLETE	2.88703e-109	22.1766	268	1746.74	66.6801	1.08264e-108
FOXP1	ENRICH	0	-67.5626	10483	2539.3	117.575	0		FOXP1	ENRICH	3.3685e-25	-10.3043	4738	3435.65	126.389	5.94441e-25
NFE2L2	ENRICH	1.48646e-16	-8.17442	1481	1178.08	37.0571	1.88046e-16		NFE2L2	ENRICH	1.7622e-100	-21.2469	1856	1042.03	38.3101	6.38039e-100
ETV3	DEPLETE	9.87383e-14	7.35049	639	866.75	30.9843	1.21971e-13		ETV3	DEPLETE	0.00493375	2.58044	697	771.92	29.0338	0.00557036
PROX1	ENRICH	0.000607929	-3.23513	395	330.09	20.0641	0.000661477		PROX1	ENRICH	0.0931793	-1.32143	348	321.8	19.827	0.0993282
MSX2	ENRICH	1.16916e-90	-20.157	486	220.49	13.1721	2.25251e-90		MSX2	ENRICH	4.05511e-07	-4.9327	318	237.29	16.3622	5.22437e-07
EGR1	DEPLETE	0	46.5122	1642	10678.2	194.277	0		EGR1	DEPLETE	4.20285e-273	35.2898	1896	9298.37	209.759	4.41299e-272
NFYB	DEPLETE	0.0064403	2.48705	987	1070.67	33.6422	0.00693571		NFYB	ENRICH	1.66456e-13	-7.28037	1221	948.66	37.4075	2.46168e-13
TWIST1	DEPLETE	5.95025e-31	11.5089	934	1634.24	60.8434	8.38626e-31		TWIST1	DEPLETE	1.34724e-22	9.71146	1000	1483.37	49.7732	2.30017e-22
EGR2	DEPLETE	6.33875e-174	28.0908	2371	6220.9	137.052	1.72875e-173		EGR2	DEPLETE	2.16386e-89	20.012	2394	5601.74	160.291	7.44936e-89
BATF3	ENRICH	0	-41.5223	5017	2772.08	54.0654	0		BATF3	ENRICH	0	-104.897	7599	2109.38	52.3332	0
IRF1	ENRICH	0	-51.1313	7023	2564.77	87.1919	0		IRF1	ENRICH	2.835e-108	-22.0736	4887	2736.79	97.411	1.04447e-107
CENPB	DEPLETE	2.80471e-53	15.3201	143	426.43	18.5005	4.49611e-53		CENPB	DEPLETE	5.10879e-35	12.2903	138	395.64	20.9629	1.08368e-34
NR1D1	DEPLETE	5.85842e-12	6.78366	723	922.35	29.3868	7.11138e-12		NR1D1	DEPLETE	5.11674e-33	11.9121	525	922.68	33.3845	1.06388e-32
IRF3	ENRICH	2.18928e-99	-21.1282	1716	1038.05	32.0874	4.37856e-99		IRF3	ENRICH	1.83248e-28	-11.0038	1428	992.46	39.581	3.63039e-28
GLIS2	DEPLETE	3.56228e-243	33.2816	245	2085.51	55.3011	1.20658e-242		GLIS2	DEPLETE	0	37.6167	321	1760.57	38.2694	0
ZNF384	ENRICH	2.40592e-123	-23.5906	10020	4991.08	213.175	5.49177e-123		ZNF384	DEPLETE	0.174707	0.935726	5791	6011.92	236.095	0.180732
SIX1	ENRICH	1.61401e-69	-17.5847	803	458.33	19.6006	2.80118e-69		SIX1	ENRICH	1.85745e-11	-6.61502	610	471.42	20.9493	2.6535e-11
FOXP2	ENRICH	0	-153.111	4680	725.69	25.8264	0		FOXP2	ENRICH	2.28507e-76	-18.4571	1747	1132.62	33.2869	7.16215e-76
SOX15	ENRICH	3.4603e-241	-33.144	1347	520.77	24.9285	1.15343e-240		SOX15	ENRICH	0.0966436	-1.30092	633	596.32	28.1955	0.102501
NFATC1	ENRICH	2.21979e-201	-30.2553	1732	843.92	29.3528	6.56557e-201		NFATC1	ENRICH	0	-46.3314	2023	771.89	27.0035	0
BARX1	ENRICH	1.28159e-97	-20.9351	500	207.25	13.9837	2.53899e-97		BARX1	ENRICH	8.84215e-08	-5.22217	301	220.21	15.4706	1.16053e-07
RFX1	ENRICH	0.420751	-0.199972	919	912.98	30.1042	0.420751		RFX1	ENRICH	1.49932e-25	-10.3819	1115	797.41	30.5908	2.7619e-25
BHLHE40	DEPLETE	0.00046038	3.31368	485	591.26	32.067	0.000503541		BHLHE40	DEPLETE	1.1757e-39	13.1255	179	676.67	37.9162	2.59891e-39
VEZF1	DEPLETE	1.97748e-136	24.8329	250	2002.99	70.5914	4.82873e-136		VEZF1	DEPLETE	9.93877e-98	20.9473	307	1806.02	71.5617	3.53753e-97
KLF4	DEPLETE	3.91073e-301	37.0724	3771	8809.24	135.903	1.52084e-300		KLF4	DEPLETE	1.06669e-215	31.325	3971	7818.65	122.83	8.00014e-215
LMX1B	ENRICH	0	-58.8941	1343	243.47	18.6696	0		LMX1B	ENRICH	5.14386e-95	-20.6475	648	269.24	18.3441	1.80035e-94
POU2F3	ENRICH	0	-69.4952	1940	500.08	20.7197	0		POU2F3	ENRICH	6.4073e-165	-27.3438	1218	543.14	24.6806	3.12915e-164
LEF1	ENRICH	1.12071e-213	-31.1762	1267	529.66	23.6508	3.41085e-213		LEF1	ENRICH	5.35469e-50	-14.8211	893	541.9	23.6893	1.30754e-49
ETV6	DEPLETE	8.95505e-41	13.3192	898	1456.29	41.9163	1.34326e-40		ETV6	ENRICH	0.00217125	-2.85215	1349	1245.7	36.2183	0.00247806
ZIC5	DEPLETE	0	39.9777	471	3635.8	79.1642	0		ZIC5	DEPLETE	0	37.7085	586	3033.98	64.9186	0
TBX19	ENRICH	3.91513e-40	-13.2086	663	312.24	26.5555	5.83104e-40		TBX19	ENRICH	5.60723e-20	-9.07648	532	310.04	24.4544	9.12805e-20
CREB3L4	DEPLETE	5.72852e-50	14.8165	410	856.25	30.1184	8.97752e-50		CREB3L4	DEPLETE	7.75973e-34	12.0684	479	796.31	26.2927	1.62954e-33
HES6	DEPLETE	7.96198e-12	6.73922	294	441.97	21.9565	9.55437e-12		HES6	DEPLETE	2.7961e-25	10.3222	209	456.59	23.9861	4.97612e-25
CREB5.V5	ENRICH	1.50501e-86	-19.6831	1745	951.24	40.327	2.79692e-86		CREB5.V5	ENRICH	4.92825e-65	-16.9893	1666	903.43	44.8853	1.39856e-64
NFIB	DEPLETE	2.40533e-60	16.3439	1688	2843.08	70.6736	4.04095e-60		NFIB	DEPLETE	3.66165e-143	25.4486	1196	2810.12	63.4268	1.67162e-142
ZEB1	DEPLETE	1.21767e-122	23.5219	552	1513.07	40.8585	2.74958e-122		ZEB1	DEPLETE	8.36559e-86	19.596	660	1345.52	34.9827	2.83351e-85
TBX6	ENRICH	0.151139	-1.03156	623	598.2	24.0412	0.157906		TBX6	DEPLETE	0.352914	0.377466	576	584.59	22.757	0.358028
FLI1	DEPLETE	2.68604e-84	19.4186	1616	2731.97	57.4691	4.94798e-84		FLI1	ENRICH	2.20505e-66	-17.1706	2935	2170.16	44.5436	6.3433e-66
TCF7L1	ENRICH	1.55253e-99	-21.1444	1179	618.63	26.502	3.13491e-99		TCF7L1	ENRICH	1.82428e-21	-9.44225	853	627.17	23.917	3.06479e-21
KLF10	DEPLETE	2.1724e-173	28.047	2044	4979.65	104.669	5.84877e-173		KLF10	DEPLETE	1.95404e-237	32.8825	1797	4634.01	86.2772	1.6414e-236
ERG	DEPLETE	4.65593e-35	12.2978	655	1018.8	29.5826	6.74307e-35		ERG	ENRICH	0.423517	-0.192904	887	881.33	29.3929	0.427589
CREB3L1	DEPLETE	1.21401e-11	6.67765	436	604.13	25.178	1.44035e-11		CREB3L1	DEPLETE	8.2625e-06	4.30731	456	553.47	22.629	1.0267e-05
RUNX1	ENRICH	0	-45.7022	3438	1556.57	41.1671	0		RUNX1	DEPLETE	2.38527e-39	13.0718	1396	1970.41	43.9426	5.21777e-39
ZNF382	ENRICH	3.39312e-50	-14.8517	899	508.19	26.3142	5.35756e-50		ZNF382	ENRICH	3.94758e-13	-7.16296	666	495.02	23.87	5.75689e-13
ZNF382.GFP	ENRICH	1.61425e-113	-22.613	1535	820.06	31.6163	3.45911e-113		ZNF382.GFP	ENRICH	1.64114e-31	-11.6195	1112	785.49	28.1003	3.346e-31
EN2	ENRICH	7.61226e-12	-6.74574	378	264.92	16.7632	9.18721e-12		EN2	DEPLETE	0.00836549	2.39257	229	271.37	17.709	0.00929499
PKNOX2	ENRICH	7.47327e-06	-4.32947	925	779.8	33.5376	8.39245e-06		PKNOX2	ENRICH	9.39849e-14	-7.35708	951	728.12	30.2946	1.39977e-13
E2F7	ENRICH	0.282436	-0.575619	487	472.34	25.4682	0.287921		E2F7	ENRICH	0.000102431	-3.71295	496	420.73	20.2723	0.000121528
Stat6	ENRICH	5.73088e-93	-20.4185	1750	899.78	41.6398	1.11434e-92		Stat6	ENRICH	8.87411e-58	-15.9795	1542	870.47	42.0244	2.32945e-57
THAP11	DEPLETE	2.23049e-14	7.5468	1055	1332.46	36.7653	2.77161e-14		THAP11	DEPLETE	6.85985e-06	4.3483	1054	1227.54	39.9099	8.57482e-06
SIX2	ENRICH	4.96217e-128	-24.0428	1175	599.56	23.934	1.18416e-127		SIX2	ENRICH	4.27437e-27	-10.7162	892	600.58	27.1945	8.16016e-27
FOXA3	ENRICH	0	-159.1	4073	443.1	22.8152	0		FOXA3	ENRICH	3.11048e-20	-9.14042	1084	815.02	29.4275	5.10313e-20
ATF7	ENRICH	5.64463e-12	-6.78903	961	674.59	42.1872	6.8917e-12		ATF7	ENRICH	4.37626e-17	-8.32059	968	650.72	38.1319	6.70813e-17
ZNF692.GFP	DEPLETE	5.23252e-228	32.2162	646	2603.96	60.7756	1.69051e-227		ZNF692.GFP	DEPLETE	2.84464e-127	23.9702	768	2242.89	61.5301	1.17132e-126
KLF17	DEPLETE	3.48787e-266	34.8358	1090	3733.19	75.8756	1.22075e-265		KLF17	DEPLETE	1.08048e-206	30.6566	1178	3263.79	68.0373	7.31938e-206
HINFP	DEPLETE	1.56392e-221	31.7505	230	2053.99	57.4476	4.9761e-221		HINFP	DEPLETE	3.97979e-188	29.2304	361	1737.77	47.1005	2.2588e-187
RELA	DEPLETE	3.94977e-42	13.5502	723	1294.15	42.1506	6.01051e-42		RELA	ENRICH	3.15957e-09	-5.80808	1294	1060.28	40.2405	4.30851e-09
ZNF449	DEPLETE	9.16554e-254	34.0057	990	2575.83	46.6342	3.15535e-253		ZNF449	DEPLETE	7.3649e-149	25.9581	975	2331.2	52.2457	3.43695e-148
ZIC4	DEPLETE	1.23712e-294	36.6668	432	3066.6	71.8525	4.63921e-294		ZIC4	DEPLETE	8.65667e-283	35.9158	536	2602.92	57.549	1.00994e-281
ZNF519.GFP	DEPLETE	0	38.5267	773	3365.6	67.2936	0		ZNF519.GFP	DEPLETE	2.18358e-182	28.7753	1118	2879.19	61.2049	1.14638e-181
FOXC2	ENRICH	0	-200.915	6756	803.37	29.6275	0		FOXC2	ENRICH	4.58332e-54	-15.4374	2069	1358.3	46.0374	1.14583e-53
ZBTB29	DEPLETE	7.83769e-107	21.923	651	1659.37	45.996	1.61364e-106		ZBTB29	DEPLETE	3.48215e-80	18.926	744	1419.36	35.6842	1.14258e-79
TGIF1	ENRICH	1.59635e-10	-6.28912	925	708.66	34.3991	1.87282e-10		TGIF1	ENRICH	4.69674e-15	-7.74721	897	650.43	31.8269	7.09579e-15
SOX12	ENRICH	1.8753e-53	-15.3463	435	213.87	14.4094	3.05282e-53		SOX12	ENRICH	0.00952596	-2.34451	269	233.25	15.2484	0.0105287
MSC	DEPLETE	0.381316	0.302027	1087	1100.26	43.9034	0.384982		MSC	DEPLETE	0.240781	0.703792	990	1017.71	39.3724	0.247863
ZBTB7A	DEPLETE	3.99542e-196	29.8531	1066	2944.54	62.926	1.16533e-195		ZBTB7A	DEPLETE	1.89199e-78	18.7143	1444	2463.86	54.4962	6.01998e-78
ZBTB18	ENRICH	2.41225e-09	-5.85312	1186	973.7	36.2713	2.81429e-09		ZBTB18	ENRICH	0.00125108	-3.02308	1067	958.5	35.8905	0.00144355
LBX2	ENRICH	2.50951e-138	-25.0079	632	197.86	17.3601	6.19997e-138		LBX2	ENRICH	1.23973e-27	-10.8301	389	207.89	16.7229	2.41058e-27
ZNF467.GFP	DEPLETE	0	54.5415	632	5361.47	86.7132	0		ZNF467.GFP	DEPLETE	0	46.6743	389	4626.13	90.7809	0
POU6F1	ENRICH	0	-41.5239	972	164.26	19.4524	0		POU6F1	ENRICH	7.59477e-73	-18.0138	478	174.76	16.8338	2.31145e-72
ZBTB7C	DEPLETE	5.08533e-152	26.2366	344	1377.18	39.3794	1.30234e-151		ZBTB7C	DEPLETE	4.88913e-152	26.2381	322	1214.44	34.0132	2.33345e-151
MAFF	ENRICH	0	-42.077	3251	1216.48	48.3523	0		MAFF	ENRICH	0	-48.5105	3178	1162.95	41.5384	0
NR2F2	ENRICH	4.65701e-97	-20.8736	1012	561.19	21.5972	9.13993e-97		NR2F2	DEPLETE	0.000527317	3.27553	556	639.57	25.5134	0.000615203
PBX1	ENRICH	8.54477e-182	-28.7279	742	272.2	16.3534	2.42487e-181		PBX1	ENRICH	4.54529e-79	-18.7902	659	278.15	20.2686	1.46848e-78
MYBL1	ENRICH	5.32316e-07	-4.8793	178	112.23	13.4794	6.10854e-07		MYBL1	ENRICH	0.0368764	-1.78814	139	115.72	13.0191	0.0401246
TCF4	DEPLETE	0	39.8447	465	2654.06	54.9398	0		TCF4	DEPLETE	8.71252e-231	32.414	590	2320.64	53.3917	7.03703e-230
ZNF136	ENRICH	2.7923e-202	-30.3237	1179	475.94	23.1852	8.37691e-202		ZNF136	ENRICH	6.10014e-68	-17.3776	834	475.87	20.6087	1.80427e-67
ZNF136.GFP	ENRICH	0	-72.9787	2003	490.56	20.7244	0		ZNF136.GFP	ENRICH	4.33137e-203	-30.385	1255	549.76	23.2101	2.67526e-202
ZNF682	DEPLETE	2.69847e-124	23.683	2003	3799.14	75.8409	6.22724e-124		ZNF682	DEPLETE	1.5303e-191	29.4979	1255	3316.14	69.8741	9.18181e-191
TEAD4	ENRICH	2.49615e-180	-28.6104	1938	1015.73	32.2355	6.89725e-180		TEAD4	ENRICH	1.81822e-45	-14.1031	1539	1067	33.4679	4.24252e-45
ZBTB14	DEPLETE	0	43.4159	882	4884.4	92.1873	0		ZBTB14	DEPLETE	6.96748e-267	34.882	902	4128.51	92.4978	6.96748e-266
MAFK	ENRICH	1.7965e-219	-31.6009	2759	1227.55	48.4623	5.54801e-219		MAFK	ENRICH	0	-37.8555	2791	1159.87	43.0883	0
POU3F3	ENRICH	0	-82.201	2069	395.78	20.3552	0		POU3F3	ENRICH	0	-44.8599	1407	426.59	21.8549	0
FOXO6	ENRICH	0	-109.301	2737	356.59	21.7785	0		FOXO6	ENRICH	1.97004e-10	-6.25638	787	641.26	23.2946	2.73979e-10
PBX2	ENRICH	3.62376e-152	-26.2495	916	412.65	19.1756	9.39492e-152		PBX2	ENRICH	8.39987e-275	-35.4005	1010	385.33	17.6458	9.28407e-274
EBF2	DEPLETE	9.22092e-33	11.8629	1505	2303.36	67.2987	1.31727e-32		EBF2	DEPLETE	2.14016e-71	17.8281	934	2261.19	74.4439	6.42048e-71
ETV5	DEPLETE	9.13397e-84	19.3556	957	1808.72	44.0037	1.66794e-83		ETV5	DEPLETE	7.90815e-05	3.77789	1393	1534.89	37.558	9.48978e-05
FOSL2::JUND(var.2)	ENRICH	4.75049e-83	-19.2705	1505	792.72	36.9622	8.52652e-83		FOSL2::JUND(var.2)	ENRICH	2.71729e-05	-4.03611	934	784.79	36.9688	3.29845e-05
