# Supplementary material for: Lineage-specific differences and regulatory networks governing human chondrocyte development
Source: eLife. 2023 Mar 15;12:e79925. doi: 10.7554/eLife.79925 (PMC10069868; doi:10.7554/eLife.79925)
Supplement: Supplementary file 4. — (a) Summarized statistics comparing genes grouped by regulatory behavior. (b) Significant genes assigned to cluster 1 - ‘Poorly explained.’ DESeq2 DEG statistics for all genes are shown, along with the amount of variance in gene expression which was ascribed to either enhancer cis-regulatory scores, promoter accessibility, the interaction term, and variance which could not be explained, ‘Unexplained.’ (c) Significant genes assigned to cluster 2 - ‘Combo-centric.’ (d) Significant genes assigned to cluster 3 - ‘Promoter-centric.’ (e) Significant genes assigned to cluster 4 - ‘Enhancer-centric.’ (f) The set of differentially-expressed transcription factors for which motif enrichments were tested in regulatory sequences associated with genes falling in different regulatory groups. Columns I-K indicates whether a significant enrichment was observed for promoter-centric, enhancer-centric, or combo-centric genes. Column L indicates the direction of the differential expression of a given TF. (g) Results of motif enrichment testing for promoters of promoter-centric genes. Columns E-G refers to the enrichment statistics for BMP-biased DEGs. Columns I-K refers to enrichment statistics for TGF-biased DEGs. Sets of TFs are grouped based on their lineage-specificity behaviors. (h) Results of motif enrichment testing for putative enhancers of enhancer-centric genes. Columns E-I refers to the enrichment statistics for BMP-biased DEGs. Columns J-O refers to enrichment statistics for TGF-biased DEGs. ‘GENOME_TAG’ refers to enrichment results when using the entire genome as a background set. Sets of TFs are grouped based on their lineage-specificity behaviors. (i) Results of motif enrichment testing for putative enhancers of combo-centric genes. Columns E-I refers to the enrichment statistics for BMP-biased DEGs. Columns J-O refers to enrichment statistics for TGF-biased DEGs. ‘GENOME_TAG’ refers to enrichment results when using the entire genome as a background set. Sets of TFs are g [file elife-79925-supp4.xlsx]

## Sheet: supplementary file 4a
Cluster DEG Statistics (relating to Figure 3C)
Cluster Label	Cluster	# of Genes in cluster	# of DEGs in cluster	Percent DEGs	AVG_FC	SD_FC
Unexplained	1	3073	832	0.270745	0.492529	0.583868
Combo-centric	2	2977	1410	0.473631	0.926383	1.16871
Promoter-centric	3	2002	911	0.455045	0.811465	0.917661
Enhancer-centric	4	4319	2529	0.585552	0.889578	0.870049
Cluster DEG Comparisons (relating to Figure 3C)
Comparison (Cluster A – Cluster B)	Difference in absolute logFC (Cluster A – Cluster B)	Lower CI	Upper CI	Tukey Post-hoc adjusted p-value
2022-02-01	0.433854	0.374243	0.493465	0
2022-03-01	0.318936	0.252359	0.385513	0
2022-04-01	0.397049	0.342344	0.451754	0
2022-03-02	-0.114918	-0.181917	-0.047919	6.23941e-05
2022-04-02	-0.0368054	-0.0920236	0.0184127	0.317045
2022-04-03	0.0781128	0.0154385	0.140787	0.0074694
Chi-Sq comparisons of shared directionality between regulatory metrics and RNA expression
Metric	Gene set for RNA expression	chi_p	chi_stat	Percent of genes sharing direction
Promoter Accessibility	Unexplained	0.270468	1.21437	0.507322
Promoter Accessibility	Combo-centric	1.83581e-14	58.7007	0.575747
Promoter Accessibility	Promoter-centric	0.000559114	11.9074	0.546454
Promoter Accessibility	Enhancer-centric	0.0206988	5.35198	0.51285
Enhancer Accessibility	Unexplained	0.00706569	0.00706569	0.527172
Enhancer Accessibility	Combo-centric	6.39371e-13	51.7222	0.561975
Enhancer Accessibility	Promoter-centric	0.00851236	6.92238	0.521978
Enhancer Accessibility	Enhancer-centric	2.9395e-14	57.7745	0.562167

## Sheet: supplementary file 4b
gene	clust	baseMean	log2FoldChange	lfcSE	stat	pvalue	padj	ENH_variance	PROM_variance	Unexplained_variance	Combo.Int.variance	DIR
PTPN11	1	12451.3	-2.4267	0.131549	-18.447	5.50721e-76	8.97565e-74	0.232349	6.80518e-08	0.513664	0.253987	UP_BMP
NNMT	1	3159.48	2.94308	0.164405	17.9014	1.14992e-71	1.70376e-69	0.343614	0.0702777	0.556296	0.0298118	UP_TGF
GBGT1	1	400.621	3.29748	0.20361	16.1951	5.46157e-59	5.85609e-57	0.0631361	0.00600173	0.592443	0.338419	UP_TGF
TSPAN13	1	2671.97	-4.09935	0.254299	-16.1202	1.83961e-58	1.90968e-56	0.208963	0.0714405	0.666758	0.0528382	UP_BMP
SATB2	1	876.449	-2.75332	0.181763	-15.1478	7.82951e-52	6.47743e-50	0.0478301	0.162521	0.564531	0.225118	UP_BMP
LAMC3	1	3063.98	2.8551	0.192635	14.8213	1.06699e-49	8.24161e-48	0.208954	0.0450799	0.392882	0.353084	UP_TGF
CA2	1	596.151	-5.58937	0.396278	-14.1047	3.55371e-45	2.3075e-43	0.0156571	0.219159	0.559817	0.205366	UP_BMP
MAP3K6	1	1932.19	2.70689	0.193731	13.9724	2.29732e-44	1.44007e-42	0.0211642	0.0394601	0.747041	0.192334	UP_TGF
STEAP3	1	4876.41	2.79413	0.200933	13.9058	5.84127e-44	3.6061e-42	0.202111	0.209757	0.525741	0.0623919	UP_TGF
RFFL	1	905.5	2.27611	0.169772	13.4069	5.50977e-41	3.15082e-39	0.00699558	0.293038	0.695875	0.0040907	UP_TGF
TBC1D1	1	11602.5	-2.02929	0.151382	-13.4051	5.6475e-41	3.21829e-39	0.188026	0.0011497	0.45892	0.351904	UP_BMP
GAS6	1	2511.71	2.60964	0.196876	13.2552	4.20852e-40	2.33301e-38	0.331682	0.181809	0.45976	0.0267498	UP_TGF
PRKAR2A	1	4537.96	-1.71262	0.129687	-13.2058	8.1244e-40	4.44334e-38	0.174558	0.113753	0.647744	0.0639447	UP_BMP
ZNF521	1	1882.76	3.4502	0.261924	13.1725	1.26286e-39	6.81526e-38	0.0311683	0.0100313	0.894706	0.0640949	UP_TGF
PLXDC1	1	526.66	4.02909	0.316191	12.7426	3.4289e-37	1.67318e-35	0.215742	0.248658	0.337686	0.197914	UP_TGF
DSTN	1	27808.4	-1.86982	0.148302	-12.6082	1.90373e-36	8.96734e-35	0.00466339	0.33329	0.636302	0.0257449	UP_BMP
PALM	1	1637.09	2.19058	0.17516	12.5062	6.90329e-36	3.1963e-34	0.0384558	0.0520922	0.509663	0.399789	UP_TGF
SPARC	1	403645	2.31263	0.186607	12.393	2.85059e-35	1.27986e-33	0.068516	0.00735536	0.610958	0.31317	UP_TGF
SLC16A4	1	743.489	2.17623	0.175659	12.3889	3.00059e-35	1.33983e-33	0.109185	0.113223	0.744342	0.0332504	UP_TGF
CAMKK1	1	1393.38	2.88883	0.233885	12.3515	4.78282e-35	2.12399e-33	0.214025	0.215835	0.259985	0.310155	UP_TGF
CTSK	1	2017.72	1.83525	0.155681	11.7885	4.47507e-32	1.76171e-30	0.0359603	0.0533896	0.815061	0.095589	UP_TGF
CKB	1	25754.7	-3.43212	0.29165	-11.768	5.70859e-32	2.24189e-30	0.454667	0.0222704	0.521466	0.00159659	UP_BMP
ARSI	1	705.715	-2.01609	0.172174	-11.7096	1.13785e-31	4.3841e-30	0.151967	0.0170444	0.466462	0.364526	UP_BMP
EMILIN2	1	587.805	-2.32243	0.19843	-11.704	1.2158e-31	4.67337e-30	0.0767022	0.210275	0.666498	0.0465252	UP_BMP
ZBED3-AS1	1	208.919	-3.70687	0.317908	-11.6602	2.03546e-31	7.75091e-30	0.139871	0.0914468	0.677607	0.0910752	UP_BMP
ALS2	1	1684.97	-1.82929	0.156907	-11.6584	2.07807e-31	7.89475e-30	0.00836239	0.0447539	0.94336	0.00352405	UP_BMP
LIPG	1	899.665	4.09109	0.356387	11.4794	1.67521e-30	6.19105e-29	0.0913659	0.338318	0.36356	0.206756	UP_TGF
HEY1	1	255.404	-3.31056	0.291394	-11.3611	6.52944e-30	2.36482e-28	0.0412518	0.311589	0.628943	0.0182165	UP_BMP
PRKAG2	1	537.233	-2.31073	0.204961	-11.274	1.76385e-29	6.263e-28	0.420101	0.00177637	0.558717	0.0194064	UP_BMP
VEGFB	1	1090.34	1.69398	0.151153	11.207	3.76547e-29	1.31412e-27	0.00539103	0.0865609	0.88505	0.0229982	UP_TGF
PDLIM1	1	604.389	-3.35335	0.299598	-11.1928	4.42126e-29	1.53641e-27	0.0508247	0.233192	0.620176	0.0958066	UP_BMP
ADAM10	1	2039.75	-1.87567	0.169807	-11.0459	2.29486e-28	7.72762e-27	0.321795	0.130865	0.459375	0.0879647	UP_BMP
SRRM3	1	273.967	2.40895	0.219961	10.9518	6.51714e-28	2.15449e-26	0.057624	0.0150534	0.690075	0.237248	UP_TGF
TSPAN14	1	3920.74	-2.8375	0.2632	-10.7808	4.24338e-27	1.35871e-25	0.0671842	0.0884673	0.820933	0.0234155	UP_BMP
BACE2	1	818.723	1.68329	0.158625	10.6118	2.6271e-26	8.14e-25	0.0010829	0.272503	0.562317	0.164097	UP_TGF
ZNF219	1	764.586	2.06095	0.196255	10.5014	8.5112e-26	2.5688e-24	0.00463648	0.0868821	0.763548	0.144933	UP_TGF
UHMK1	1	1969.08	-1.65055	0.157843	-10.4569	1.36257e-25	4.05981e-24	0.129065	0.165203	0.625074	0.0806577	UP_BMP
RARA	1	612.446	1.69604	0.164986	10.2799	8.67792e-25	2.45543e-23	0.0776472	0.0417538	0.470067	0.410531	UP_TGF
ABR	1	4067.67	2.03555	0.19829	10.2655	1.00818e-24	2.82326e-23	0.199331	0.000263908	0.459316	0.34109	UP_TGF
TUBB2A	1	6197.27	-2.04574	0.199576	-10.2505	1.17783e-24	3.29267e-23	0.0100102	0.321576	0.593565	0.074849	UP_BMP
MXRA5	1	7306.93	2.22414	0.217448	10.2284	1.48005e-24	4.10935e-23	0.285554	0.018042	0.632474	0.0639299	UP_TGF
MAP3K12	1	821.444	2.26372	0.222284	10.1839	2.33994e-24	6.45285e-23	0.378833	0.103649	0.464749	0.0527696	UP_TGF
TIPARP	1	1962.01	-2.29579	0.22724	-10.1029	5.36103e-24	1.4514e-22	0.0999735	0.274263	0.393144	0.232619	UP_BMP
VAV2	1	977.004	1.62503	0.162671	9.98967	1.69147e-23	4.41789e-22	0.374679	0.0396192	0.476232	0.10947	UP_TGF
UST	1	716.885	-1.85958	0.186902	-9.9495	2.53449e-23	6.55668e-22	0.016468	0.1416	0.533245	0.308687	UP_BMP
ZEB1	1	1929.38	1.67393	0.169119	9.89792	4.25013e-23	1.08232e-21	0.0777513	0.0463081	0.513493	0.362447	UP_TGF
NET1	1	2108.2	2.17162	0.219558	9.89088	4.55993e-23	1.1558e-21	0.0169693	0.120491	0.71613	0.146409	UP_TGF
UBE2H	1	5216.69	-1.08113	0.109829	-9.84375	7.29405e-23	1.83172e-21	0.000135186	0.0840912	0.904957	0.0108165	UP_BMP
ARVCF	1	204.325	2.28833	0.234968	9.73888	2.05801e-22	5.03626e-21	0.0584878	0.00123088	0.522963	0.417318	UP_TGF
NPR2	1	2144.57	1.29479	0.135371	9.56473	1.12495e-21	2.64948e-20	0.274255	0.00150618	0.681451	0.042788	UP_TGF
GABBR2	1	70.9167	4.78533	0.502387	9.52519	1.64744e-21	3.85222e-20	0.0246162	0.330856	0.61667	0.0278572	UP_TGF
CPT1C	1	376.292	2.50537	0.264988	9.45468	3.24015e-21	7.43774e-20	0.0562771	0.134638	0.664605	0.144479	UP_TGF
JAK3	1	1234.3	2.02201	0.214648	9.42013	4.50538e-21	1.02411e-19	0.0236364	0.00421056	0.873551	0.0986026	UP_TGF
SLCO4C1	1	278.078	-3.67716	0.391449	-9.39372	5.79183e-21	1.30923e-19	0.109929	0.00177487	0.698961	0.189335	UP_BMP
NEIL1	1	417.94	2.07492	0.221591	9.36376	7.6952e-21	1.71568e-19	0.141717	0.305975	0.493181	0.0591271	UP_TGF
LTC4S	1	166.137	3.33922	0.357625	9.33722	9.8892e-21	2.19285e-19	0.328293	0.156925	0.413589	0.101193	UP_TGF
EBF1	1	452.962	-3.18736	0.341546	-9.33217	1.03724e-20	2.29376e-19	0.228098	0.139301	0.594949	0.0376521	UP_BMP
MKLN1	1	2261.71	-1.68446	0.182668	-9.22143	2.93165e-20	6.32849e-19	0.00165685	0.0167511	0.947318	0.0342741	UP_BMP
CD70	1	101.707	5.77595	0.62962	9.17371	4.57028e-20	9.80085e-19	0.060959	0.0645159	0.474194	0.400331	UP_TGF
CORO1B	1	2249.21	-1.52244	0.166705	-9.13254	6.69126e-20	1.42183e-18	0.0644378	0.309399	0.505815	0.120349	UP_BMP
PLD2	1	685.092	1.69379	0.186554	9.07936	1.09219e-19	2.29093e-18	0.143629	0.0283991	0.383649	0.444323	UP_TGF
SLC7A2	1	8631.45	-1.38793	0.156195	-8.88588	6.34193e-19	1.26823e-17	0.0142939	0.00521088	0.504516	0.475979	UP_BMP
FANCG	1	344.353	1.84905	0.208358	8.8744	7.03136e-19	1.40438e-17	0.371894	0.117006	0.507867	0.0032331	UP_TGF
DCHS1	1	4103.23	1.47653	0.166502	8.86796	7.45008e-19	1.48619e-17	0.210763	0.0477987	0.458518	0.28292	UP_TGF
CYP27A1	1	1580.15	-1.86142	0.213024	-8.73807	2.37129e-18	4.5954e-17	0.211807	0.226641	0.376052	0.1855	UP_BMP
PGM2	1	1293.33	-1.25241	0.144305	-8.67892	3.99554e-18	7.63415e-17	0.148072	0.0666306	0.489261	0.296037	UP_BMP
FOXO4	1	1784.25	-2.36006	0.275359	-8.57082	1.02754e-17	1.9009e-16	0.0118731	0.327598	0.642464	0.0180649	UP_BMP
WNT11	1	1180.67	-3.00596	0.353342	-8.50724	1.7812e-17	3.24357e-16	0.307308	0.00259083	0.686569	0.00353204	UP_BMP
SLC35F5	1	2767.5	-1.25445	0.148092	-8.47077	2.43767e-17	4.38996e-16	0.168207	0.0255921	0.401688	0.404513	UP_BMP
ZNF276	1	1140.4	1.78433	0.214973	8.30027	1.03879e-16	1.7728e-15	0.178977	0.23329	0.407119	0.180613	UP_TGF
TIMP1	1	5164.59	2.15808	0.260339	8.2895	1.13727e-16	1.93479e-15	0.255373	0.0744822	0.346052	0.324093	UP_TGF
SH3RF3	1	435.153	1.55169	0.188481	8.23264	1.83139e-16	3.07711e-15	0.309163	0.00771808	0.552922	0.130197	UP_TGF
CERK	1	2681.86	1.03345	0.125845	8.21214	2.1728e-16	3.60613e-15	0.38172	0.00211554	0.542773	0.0733906	UP_TGF
DNAI1	1	89.5024	-3.41643	0.417198	-8.18898	2.63456e-16	4.33718e-15	0.0156629	0.142608	0.817806	0.0239236	UP_BMP
MB21D2	1	288.554	-2.12449	0.26073	-8.14822	3.69314e-16	6.02511e-15	0.446654	0.0184184	0.42841	0.106517	UP_BMP
SDK2	1	4748.28	-1.38256	0.171504	-8.0614	7.54256e-16	1.20518e-14	0.126375	0.232231	0.579086	0.0623074	UP_BMP
MATN3	1	57058.4	-1.79796	0.227829	-7.89173	2.98037e-15	4.53963e-14	0.303321	0.0715888	0.500833	0.124257	UP_BMP
ZSWIM4	1	195.232	2.02765	0.258519	7.84333	4.38769e-15	6.59691e-14	0.364601	0.099916	0.522991	0.0124914	UP_TGF
SRPX	1	1820.45	2.3389	0.298406	7.83796	4.57932e-15	6.86604e-14	0.434717	0.00329183	0.503948	0.0580434	UP_TGF
KCNA6	1	952.237	1.78468	0.229156	7.78808	6.80363e-15	1.00805e-13	0.233515	0.192447	0.310098	0.263941	UP_TGF
PIEZO1	1	11361.4	1.43825	0.1854	7.75756	8.65756e-15	1.27578e-13	0.117909	0.0108298	0.386952	0.484309	UP_TGF
COTL1	1	1001.55	-1.4872	0.194491	-7.64662	2.06335e-14	2.92422e-13	0.271769	0.00608223	0.66359	0.0585592	UP_BMP
SPRED2	1	951.197	1.25642	0.164427	7.64122	2.15181e-14	3.04693e-13	0.297406	0.00561819	0.560889	0.136087	UP_TGF
TMEM154	1	707.736	-1.36769	0.182326	-7.50136	6.31591e-14	8.54246e-13	0.00461692	0.308675	0.370248	0.31646	UP_BMP
CREB3L2	1	10835.2	0.982443	0.131049	7.49678	6.54025e-14	8.83124e-13	0.0935389	0.0627036	0.799257	0.0445004	UP_TGF
PILRB	1	2026.22	1.06576	0.14252	7.47796	7.54845e-14	1.01506e-12	0.0758582	0.352895	0.567117	0.00412936	UP_TGF
ARHGDIB	1	454.1	1.37375	0.187082	7.34303	2.08804e-13	2.73121e-12	0.046112	0.0173546	0.520469	0.416065	UP_TGF
SLC30A7	1	1269.86	-1.14218	0.155762	-7.33285	2.25315e-13	2.93539e-12	0.0678691	0.000499483	0.690368	0.241264	UP_BMP
SARS2	1	2793.82	-1.04169	0.14247	-7.31165	2.63883e-13	3.41331e-12	0.158525	0.0643525	0.643794	0.133328	UP_BMP
EPS8	1	3383.7	-1.14494	0.159258	-7.18921	6.51676e-13	8.15121e-12	0.139371	0.0391791	0.73222	0.0892305	UP_BMP
UBE2Q2	1	2362.97	1.00979	0.140834	7.17007	7.4961e-13	9.32606e-12	0.305141	0.00719179	0.57815	0.109516	UP_TGF
TMEM101	1	1150.51	-1.26631	0.178417	-7.09748	1.27053e-12	1.55459e-11	0.266775	0.038964	0.580279	0.113982	UP_BMP
PRR5L	1	110.721	2.2228	0.31558	7.04352	1.87444e-12	2.26462e-11	0.00923077	0.15918	0.587721	0.243868	UP_TGF
CPEB4	1	792.17	-1.33432	0.189728	-7.03279	2.02439e-12	2.43675e-11	0.0211231	0.111113	0.861779	0.00598526	UP_BMP
PYGB	1	5900.81	-1.15816	0.16524	-7.00895	2.4012e-12	2.86912e-11	0.28281	0.0616785	0.637362	0.0181497	UP_BMP
FURIN	1	10252.3	-1.48748	0.214072	-6.9485	3.69192e-12	4.31024e-11	0.313432	0.0397155	0.521055	0.125798	UP_BMP
EFNB1	1	539.393	-1.43855	0.207342	-6.93806	3.97532e-12	4.63115e-11	0.115255	0.000143594	0.528164	0.356438	UP_BMP
SYDE2	1	335.236	-1.51741	0.218874	-6.9328	4.12591e-12	4.78947e-11	0.0337449	0.014144	0.57059	0.381521	UP_BMP
LRRC8A	1	2655.66	-1.2585	0.181598	-6.93018	4.20317e-12	4.87063e-11	0.0452149	0.0142025	0.815232	0.125351	UP_BMP
HES1	1	208.946	1.76713	0.259089	6.82054	9.06966e-12	1.01106e-10	0.141103	0.119399	0.623717	0.115781	UP_TGF
TNFSF9	1	87.7925	2.59733	0.38122	6.8132	9.54523e-12	1.06117e-10	0.0558526	0.00968372	0.633862	0.300602	UP_TGF
CLK2	1	1138.27	0.893619	0.131561	6.79245	1.10246e-11	1.21899e-10	0.0275979	0.0799969	0.46559	0.426816	UP_TGF
IFNGR2	1	1739.64	0.985786	0.148195	6.65197	2.89198e-11	3.06062e-10	0.305547	0.00662304	0.682843	0.0049868	UP_TGF
BFSP1	1	830.842	-1.20306	0.180934	-6.64915	2.94797e-11	3.11381e-10	0.0288422	0.0671561	0.805858	0.0981441	UP_BMP
GOLGA8A	1	5596.77	1.69557	0.256025	6.62267	3.52763e-11	3.69732e-10	0.0925571	0.0773637	0.662751	0.167328	UP_TGF
IRX2	1	320.624	1.36765	0.20771	6.58443	4.56644e-11	4.74339e-10	0.0215693	0.213987	0.717747	0.0466964	UP_TGF
TMEM200C	1	128.517	-1.71214	0.260579	-6.57051	5.01427e-11	5.19533e-10	0.0833538	0.0458523	0.383824	0.48697	UP_BMP
SUN1	1	4032	1.26059	0.192223	6.55793	5.45602e-11	5.6387e-10	0.0212401	0.000580734	0.977243	0.000935969	UP_TGF
ODC1	1	3050.92	-2.06631	0.315226	-6.555	5.56412e-11	5.74313e-10	0.0456717	0.251991	0.532406	0.169931	UP_BMP
HRC	1	53.1229	-2.98038	0.457311	-6.51717	7.16443e-11	7.32074e-10	0.139752	8.59882e-05	0.815226	0.0449367	UP_BMP
EPHB3	1	1051.19	1.53299	0.235878	6.4991	8.08006e-11	8.22028e-10	0.0235458	0.268492	0.463962	0.244001	UP_TGF
NLGN3	1	329.141	-2.06498	0.32012	-6.45063	1.11389e-10	1.12271e-09	0.0473826	0.113331	0.491358	0.347928	UP_BMP
STXBP4	1	229.667	-1.49836	0.233907	-6.40581	1.49578e-10	1.49102e-09	0.311725	0.0463554	0.611834	0.0300854	UP_BMP
TP53INP1	1	821.58	-1.18483	0.185085	-6.40156	1.53794e-10	1.53118e-09	0.161376	0.189663	0.354607	0.294354	UP_BMP
SLC2A3	1	997.229	2.32787	0.364295	6.39005	1.65828e-10	1.64096e-09	0.0511912	0.341218	0.559899	0.0476915	UP_TGF
FBN1	1	43073.3	0.835499	0.130865	6.38442	1.72048e-10	1.69838e-09	0.242232	0.0198013	0.630353	0.107614	UP_TGF
IL11RA	1	1823.23	1.63593	0.256852	6.36918	1.90046e-10	1.86476e-09	0.00042245	0.0127651	0.672024	0.314789	UP_TGF
MMP13	1	1912.81	4.80013	0.761484	6.30365	2.90707e-10	2.79031e-09	0.116474	0.314022	0.498768	0.0707362	UP_TGF
SOX9	1	13235.1	-0.92777	0.147239	-6.30112	2.95512e-10	2.83142e-09	0.372148	0.0606888	0.54715	0.020013	UP_BMP
CLIC3	1	369.949	-2.32645	0.369676	-6.29323	3.10921e-10	2.97033e-09	0.23009	0.0219576	0.747606	0.000346182	UP_BMP
NECAB3	1	703.669	-1.23297	0.196614	-6.271	3.58735e-10	3.41112e-09	0.149206	0.100212	0.598224	0.152358	UP_BMP
DENND4B	1	1548.56	0.867234	0.138766	6.24963	4.11421e-10	3.8804e-09	0.243676	0.0172297	0.590432	0.148663	UP_TGF
TTC39B	1	341.552	-1.45544	0.233053	-6.24509	4.2356e-10	3.98742e-09	0.00548545	0.338766	0.398252	0.257497	UP_BMP
LTBR	1	3292.97	-0.7252	0.116477	-6.22614	4.78072e-10	4.48568e-09	0.223795	0.200956	0.345815	0.229433	UP_BMP
OSBPL5	1	2359.7	-1.1788	0.189684	-6.21457	5.14653e-10	4.81306e-09	0.220698	0.176713	0.333024	0.269565	UP_BMP
PLEKHF2	1	365.075	-1.16972	0.191938	-6.09424	1.09959e-09	9.91757e-09	0.171349	0.286934	0.390085	0.151632	UP_BMP
APBB2	1	7255.78	-0.79224	0.13017	-6.08621	1.15618e-09	1.03877e-08	0.0449295	0.00183583	0.733836	0.219398	UP_BMP
ANKRD52	1	2768.74	0.700635	0.116237	6.02761	1.66398e-09	1.47073e-08	0.0908231	0.00599687	0.857418	0.045762	UP_TGF
NES	1	1324.45	-1.17165	0.194504	-6.02378	1.70388e-09	1.50514e-08	0.144457	0.242535	0.529968	0.0830402	UP_BMP
KRT23	1	40.7049	4.45726	0.740684	6.01776	1.76843e-09	1.55794e-08	0.135938	0.00151324	0.730945	0.131604	UP_TGF
PYGL	1	5525.04	-1.11371	0.18529	-6.01062	1.84819e-09	1.62294e-08	0.182555	0.0979852	0.640094	0.0793657	UP_BMP
IMPDH2	1	5027.12	0.7399	0.123503	5.99095	2.08624e-09	1.82216e-08	0.15827	0.24161	0.329809	0.270311	UP_TGF
MVD	1	2903.52	-1.14744	0.191927	-5.97853	2.25155e-09	1.96234e-08	0.12847	0.0187562	0.642613	0.210161	UP_BMP
ZNF692	1	488.718	1.07787	0.180533	5.97047	2.3657e-09	2.04977e-08	0.0924977	0.285591	0.576862	0.0450495	UP_TGF
SLC3A2	1	4122.12	-1.32448	0.222938	-5.94101	2.83274e-09	2.43502e-08	0.203957	0.240881	0.329718	0.225444	UP_BMP
FUT11	1	1832.52	1.16627	0.196347	5.93985	2.85278e-09	2.45095e-08	0.00394625	0.286164	0.638705	0.0711845	UP_TGF
GRHL1	1	123.786	-1.85666	0.313017	-5.93151	3.00163e-09	2.5707e-08	0.0013017	0.0773107	0.588726	0.332661	UP_BMP
SLC16A9	1	1559.05	-1.74347	0.294587	-5.91834	3.25207e-09	2.77499e-08	0.00980966	0.0594204	0.57084	0.35993	UP_BMP
COG7	1	883.23	0.820772	0.138733	5.91618	3.29503e-09	2.8087e-08	0.057632	0.0260137	0.896421	0.0199332	UP_TGF
PLK3	1	238.505	1.33056	0.227024	5.86087	4.60435e-09	3.86813e-08	0.033022	0.0560894	0.460884	0.450005	UP_TGF
CHD6	1	2571.97	-1.04403	0.178156	-5.86022	4.62257e-09	3.88144e-08	0.429777	0.0425843	0.484508	0.0431309	UP_BMP
SERPINF2	1	67.5703	2.1822	0.372489	5.85843	4.67269e-09	3.91746e-08	0.000574017	0.189923	0.730196	0.0793066	UP_TGF
BMP2	1	526.18	-1.13714	0.194462	-5.84763	4.98613e-09	4.16311e-08	0.000613995	0.284092	0.5155	0.199794	UP_BMP
WNK2	1	444.347	-1.52269	0.261804	-5.81616	6.02165e-09	4.98177e-08	0.0164005	0.31044	0.389431	0.283729	UP_BMP
CLIP3	1	1192.93	1.36229	0.234473	5.81001	6.24708e-09	5.16041e-08	0.0272196	0.000702278	0.477224	0.494854	UP_TGF
SIK3	1	1970.88	-0.775343	0.133665	-5.80063	6.60663e-09	5.44638e-08	0.155783	0.236493	0.359016	0.248709	UP_BMP
PKM	1	17255.6	1.12444	0.194467	5.78216	7.37475e-09	6.06733e-08	3.25296e-05	1.84194e-05	0.934354	0.0655953	UP_TGF
LTN1	1	1122.87	-0.996256	0.172711	-5.76834	8.00541e-09	6.56299e-08	0.42731	0.101496	0.449369	0.0218249	UP_BMP
EMP2	1	3862.64	-0.844477	0.146905	-5.74846	9.00616e-09	7.32812e-08	0.18779	0.061393	0.748692	0.00212501	UP_BMP
TRUB1	1	456.238	-0.87175	0.152143	-5.72982	1.0054e-08	8.13606e-08	0.0226907	0.256004	0.472022	0.249283	UP_BMP
CUL4B	1	2450.42	-0.809633	0.141736	-5.71226	1.11485e-08	8.97715e-08	0.0489276	0.000355475	0.805419	0.145298	UP_BMP
ACTN1	1	9059.85	1.27452	0.224512	5.67682	1.37218e-08	1.09145e-07	0.054206	0.115517	0.74206	0.0882169	UP_TGF
PCYT1A	1	4186.07	-0.926807	0.163673	-5.66254	1.49146e-08	1.17999e-07	0.130518	0.0742374	0.54683	0.248414	UP_BMP
ACHE	1	60.764	2.54907	0.45383	5.61679	1.94542e-08	1.51924e-07	0.0286144	0.294165	0.631221	0.0460002	UP_TGF
NKD1	1	614.946	-1.54504	0.276418	-5.58951	2.27714e-08	1.76057e-07	0.0237722	0.00777568	0.769602	0.19885	UP_BMP
CDC73	1	1295.51	-0.907538	0.162523	-5.58404	2.34991e-08	1.81253e-07	0.0254443	0.28723	0.676597	0.0107295	UP_BMP
CISH	1	93.8409	2.49959	0.448167	5.57737	2.44187e-08	1.87724e-07	0.0356698	0.144268	0.819328	0.00073419	UP_TGF
PMP22	1	7139.49	0.813094	0.145894	5.5732	2.50109e-08	1.92005e-07	0.342474	0.0294074	0.588646	0.0394726	UP_TGF
C5orf38	1	223.592	1.46775	0.263468	5.57088	2.53455e-08	1.94482e-07	0.0256743	0.192085	0.743257	0.0389834	UP_TGF
CDHR2	1	29.6038	-3.58194	0.645639	-5.5479	2.89114e-08	2.20186e-07	0.0379644	0.109375	0.832376	0.020285	UP_BMP
TMSB10	1	9212.98	-1.22146	0.220636	-5.5361	3.09285e-08	2.34235e-07	0.26502	0.106914	0.545229	0.0828379	UP_BMP
GDPD3	1	138.426	2.17171	0.392905	5.52732	3.25154e-08	2.45114e-07	0.0503933	0.261279	0.458292	0.230036	UP_TGF
SSH1	1	1791.81	0.65766	0.119164	5.51895	3.41032e-08	2.56253e-07	0.276303	0.00511386	0.690274	0.0283093	UP_TGF
WNT4	1	65.2452	-2.3295	0.422562	-5.5128	3.53176e-08	2.64768e-07	0.185125	0.0271646	0.725642	0.062068	UP_BMP
ALDH4A1	1	219	-1.86214	0.338122	-5.50729	3.64393e-08	2.72551e-07	0.106016	0.0723433	0.669776	0.151865	UP_BMP
PRICKLE2	1	1569.79	-1.2082	0.219436	-5.50593	3.67232e-08	2.74171e-07	0.0573075	0.040427	0.835777	0.0664883	UP_BMP
PIGS	1	1494.91	-1.11782	0.20319	-5.50135	3.76896e-08	2.80743e-07	0.226204	0.0939992	0.59369	0.0861068	UP_BMP
RIPOR1	1	2381.61	-0.92188	0.16815	-5.48248	4.19396e-08	3.10555e-07	0.0361225	0.0513685	0.853786	0.0587233	UP_BMP
SIGIRR	1	64.1532	1.93878	0.354267	5.47265	4.43362e-08	3.27112e-07	0.439902	0.12246	0.426391	0.0112474	UP_TGF
CELSR3	1	185.524	1.40721	0.258038	5.4535	4.93891e-08	3.61123e-07	0.114736	0.00824091	0.810993	0.0660299	UP_TGF
ZNFX1	1	2447.01	0.669472	0.122766	5.45322	4.94661e-08	3.61524e-07	0.0164112	0.256059	0.493443	0.234087	UP_TGF
PIM2	1	118.494	1.77968	0.326521	5.45044	5.02449e-08	3.66559e-07	0.276252	0.0112746	0.535736	0.176737	UP_TGF
RMND5A	1	1711.23	-0.788826	0.144879	-5.44472	5.18863e-08	3.77688e-07	0.0273247	0.00865565	0.750595	0.213425	UP_BMP
ROBO3	1	319.23	1.28963	0.236895	5.44389	5.21304e-08	3.79295e-07	0.44821	0.00352941	0.478339	0.0699217	UP_TGF
NOMO1	1	6755.66	-1.00918	0.185686	-5.43488	5.48337e-08	3.98608e-07	0.0268807	0.188849	0.627646	0.156624	UP_BMP
NAXE	1	794.464	-1.14583	0.211696	-5.41259	6.21184e-08	4.47571e-07	0.257202	0.0717579	0.393025	0.278015	UP_BMP
SC5D	1	2326.02	-1.19554	0.221092	-5.40745	6.39268e-08	4.59991e-07	0.0245003	0.000774015	0.558546	0.416179	UP_BMP
SAR1B	1	1945.31	-0.731017	0.135246	-5.40508	6.47803e-08	4.65721e-07	0.0114479	0.139923	0.821843	0.0267862	UP_BMP
HSPB6	1	1204.08	-1.06271	0.197779	-5.37321	7.73469e-08	5.51444e-07	0.174216	0.0709409	0.466758	0.288085	UP_BMP
MRPS12	1	335.575	-1.30251	0.243352	-5.35238	8.68052e-08	6.14842e-07	0.274617	0.115217	0.465545	0.144621	UP_BMP
GLS	1	7180.7	-0.917132	0.171725	-5.34069	9.25932e-08	6.53849e-07	0.0576474	0.175846	0.682934	0.0835726	UP_BMP
CETN2	1	1021.12	-0.786378	0.14738	-5.33573	9.51594e-08	6.70808e-07	0.126999	0.137987	0.497136	0.237878	UP_BMP
ZNF704	1	2950.2	1.11515	0.209042	5.33457	9.57696e-08	6.74817e-07	0.0766631	0.123022	0.499571	0.300744	UP_TGF
ASPH	1	5124.48	-0.756585	0.141941	-5.33028	9.80598e-08	6.90657e-07	0.0373952	0.142758	0.548727	0.27112	UP_BMP
C14orf93	1	301.916	1.12036	0.210516	5.32198	1.02644e-07	7.21382e-07	0.0696643	0.0203768	0.427803	0.482156	UP_TGF
SNAI3-AS1	1	412.436	-1.18703	0.223173	-5.31887	1.04413e-07	7.33187e-07	0.327564	0.0194656	0.540656	0.112314	UP_BMP
SAMD14	1	169.861	1.8297	0.344622	5.30928	1.10058e-07	7.69507e-07	0.0697897	0.343693	0.547304	0.039214	UP_TGF
MICALL2	1	860.635	1.03156	0.194316	5.30868	1.1042e-07	7.71048e-07	0.190909	0.0379258	0.582154	0.189011	UP_TGF
PLAUR	1	422.949	1.68913	0.318413	5.30485	1.12768e-07	7.8509e-07	0.240872	0.0391783	0.411617	0.308333	UP_TGF
PFKFB3	1	2508.67	1.61099	0.304082	5.29789	1.17149e-07	8.14197e-07	0.00487251	0.124806	0.662005	0.208317	UP_TGF
RHPN1	1	148.499	2.20826	0.419067	5.26947	1.36818e-07	9.42856e-07	0.313539	0.0439039	0.529454	0.113104	UP_TGF
YY1	1	3632.08	-0.648016	0.123146	-5.26218	1.42359e-07	9.78803e-07	0.178231	0.0555811	0.332869	0.433319	UP_BMP
UBE2K	1	1974.89	-0.874084	0.166377	-5.25364	1.49126e-07	1.02206e-06	0.256013	0.11142	0.538574	0.0939939	UP_BMP
ADAMTS4	1	299.248	1.87245	0.35727	5.24098	1.59723e-07	1.09102e-06	0.179074	0.0305566	0.764395	0.0259744	UP_TGF
RNF208	1	53.6843	2.17783	0.416796	5.22517	1.73992e-07	1.18155e-06	0.0385565	0.278463	0.45108	0.231901	UP_TGF
ZDHHC16	1	844.063	0.771925	0.148309	5.20486	1.94142e-07	1.31182e-06	0.0149767	0.401744	0.560823	0.0224558	UP_TGF
MAMDC4	1	418.457	1.0643	0.204686	5.19968	1.99627e-07	1.34554e-06	0.0869664	0.00211235	0.693774	0.217147	UP_TGF
SLC39A13	1	2516.79	0.794118	0.153513	5.17297	2.30397e-07	1.53454e-06	0.183815	0.245122	0.299534	0.271529	UP_TGF
RANBP2	1	4709.97	-0.828209	0.160156	-5.17126	2.32516e-07	1.54738e-06	0.074806	0.0610363	0.670487	0.193671	UP_BMP
WDR1	1	6910.32	-1.19696	0.232629	-5.14535	2.67029e-07	1.7641e-06	0.294825	0.115654	0.568362	0.0211594	UP_BMP
C12orf4	1	627.004	-0.909326	0.177532	-5.12205	3.02238e-07	1.98864e-06	0.149892	0.00362406	0.83379	0.0126939	UP_BMP
GPI	1	5560.02	0.998615	0.195069	5.11929	3.06686e-07	2.01466e-06	0.189533	0.23542	0.309739	0.265308	UP_TGF
RPS18	1	137.968	-1.76172	0.344365	-5.11586	3.12308e-07	2.04912e-06	0.0917162	0.256855	0.532964	0.118464	UP_BMP
PPP2R5B	1	520.17	1.00775	0.197331	5.1069	3.27485e-07	2.14266e-06	0.26944	0.00795408	0.355341	0.367265	UP_TGF
LNPEP	1	2168.24	-0.90509	0.177361	-5.10309	3.34151e-07	2.18452e-06	0.290778	0.182297	0.422398	0.104526	UP_BMP
KDM4B	1	2702.09	-0.762032	0.149597	-5.0939	3.50766e-07	2.28763e-06	0.205371	0.0519795	0.488957	0.253692	UP_BMP
PHF10	1	1375.14	0.997234	0.195785	5.09351	3.51487e-07	2.29141e-06	0.188324	0.0782637	0.504269	0.229143	UP_TGF
BYSL	1	412.163	-1.48813	0.292636	-5.08527	3.67096e-07	2.38554e-06	0.279304	0.0184656	0.616163	0.086068	UP_BMP
HMOX1	1	542.17	-1.23381	0.242715	-5.08337	3.70799e-07	2.4048e-06	0.0254443	0.035353	0.808759	0.130443	UP_BMP
PLOD1	1	10807.3	0.877015	0.172832	5.07439	3.88735e-07	2.51513e-06	0.389966	9.4279e-05	0.593951	0.0159881	UP_TGF
NOD1	1	328.591	1.23652	0.244282	5.06186	4.15183e-07	2.67668e-06	0.12482	0.214647	0.634552	0.0259807	UP_TGF
KCNK5	1	673.566	-1.0014	0.198086	-5.0554	4.29486e-07	2.75907e-06	0.00467852	0.00137036	0.828724	0.165228	UP_BMP
ATF6	1	2531.97	-0.842959	0.167788	-5.02395	5.06199e-07	3.22267e-06	0.456153	0.00153725	0.539383	0.00292643	UP_BMP
IBA57	1	577.582	0.813734	0.16202	5.02243	5.1023e-07	3.2458e-06	0.0293429	0.19241	0.627247	0.151	UP_TGF
HERC4	1	2272.59	-0.802046	0.159826	-5.01825	5.2144e-07	3.31452e-06	0.0784076	0.3504	0.537602	0.0335903	UP_BMP
ISM1	1	871.125	-1.42912	0.285249	-5.01006	5.44127e-07	3.45065e-06	0.00775039	0.0273363	0.50393	0.460983	UP_BMP
MYH9	1	15714.8	1.13279	0.226725	4.99632	5.84362e-07	3.69288e-06	0.0710938	0.294916	0.541656	0.0923347	UP_TGF
FBXO32	1	500.989	-0.91764	0.183787	-4.99295	5.94651e-07	3.75354e-06	0.0586327	0.278363	0.587728	0.0752759	UP_BMP
MEX3D	1	758.933	1.0634	0.215941	4.92447	8.45897e-07	5.22609e-06	0.0428109	0.168853	0.507357	0.280979	UP_TGF
FAM171B	1	337.343	-1.00228	0.203867	-4.91635	8.81734e-07	5.42487e-06	0.140002	0.243014	0.501104	0.11588	UP_BMP
MFSD4B	1	436.147	-0.769613	0.156736	-4.91024	9.09664e-07	5.59038e-06	0.139513	0.0833295	0.63685	0.140307	UP_BMP
SLC9A3-AS1	1	413.565	1.08561	0.221367	4.90413	9.384e-07	5.7518e-06	0.272588	0.00770715	0.491957	0.227748	UP_TGF
SMG1P1	1	1591.49	-0.989179	0.201867	-4.90014	9.5768e-07	5.86336e-06	0.408944	0.0322986	0.531863	0.0268944	UP_BMP
PTPN18	1	1088.27	0.841366	0.171854	4.89581	9.79037e-07	5.98288e-06	0.0122061	0.303688	0.381761	0.302345	UP_TGF
ANKRD65	1	76.5122	1.87133	0.382714	4.88963	1.01027e-06	6.15757e-06	0.450418	0.0115375	0.522026	0.0160186	UP_TGF
INPP4A	1	1523.72	-0.729168	0.149315	-4.88343	1.04257e-06	6.33785e-06	0.42571	0.0118904	0.524213	0.0381858	UP_BMP
DENND4C	1	787.906	0.748244	0.153253	4.88242	1.0479e-06	6.36314e-06	0.177238	0.295357	0.392268	0.135138	UP_TGF
ZBED3	1	1296.83	-0.893962	0.184331	-4.84975	1.23614e-06	7.44243e-06	0.088077	0.241113	0.592652	0.0781585	UP_BMP
WDR35	1	769.888	-1.39666	0.288909	-4.83426	1.33639e-06	8.00752e-06	0.403827	0.128994	0.444094	0.0230851	UP_BMP
GJC1	1	945.392	0.983362	0.203512	4.83196	1.35196e-06	8.09191e-06	0.22574	0.0324422	0.597893	0.143925	UP_TGF
PTBP3	1	2193.94	-0.816652	0.169295	-4.82384	1.40817e-06	8.39693e-06	6.9791e-05	0.0919468	0.833893	0.0740902	UP_BMP
ZNF469	1	3623.38	-1.21075	0.251208	-4.8197	1.43774e-06	8.56444e-06	0.00095561	0.331767	0.442814	0.224463	UP_BMP
GRIA3	1	388.298	-1.94229	0.403433	-4.81441	1.47638e-06	8.76259e-06	0.153874	0.0131574	0.805435	0.0275337	UP_BMP
B3GNT2	1	260.543	-1.23088	0.256984	-4.78971	1.6702e-06	9.84836e-06	0.139042	0.238577	0.293614	0.328767	UP_BMP
KIAA1755	1	1010.24	2.98626	0.624962	4.77831	1.76773e-06	1.03784e-05	0.100507	0.295213	0.586043	0.0182373	UP_TGF
ZNF503	1	631.169	-1.28018	0.269552	-4.74927	2.04152e-06	1.18746e-05	0.0449503	0.245247	0.585027	0.124775	UP_BMP
FZD9	1	635.126	1.2447	0.262308	4.7452	2.08305e-06	1.20946e-05	0.273703	0.111843	0.58634	0.0281137	UP_TGF
ARL8A	1	723.162	0.747199	0.157532	4.74314	2.10429e-06	1.22136e-05	0.112066	0.252853	0.334013	0.301068	UP_TGF
DNAJC5	1	2214.07	-0.717715	0.151571	-4.73516	2.18878e-06	1.26769e-05	0.130097	0.0975994	0.562454	0.20985	UP_BMP
GRIP2	1	305.719	1.73436	0.366577	4.73123	2.23163e-06	1.29113e-05	0.0555879	0.273933	0.51843	0.15205	UP_TGF
MAP3K14	1	134.533	1.43551	0.303852	4.72438	2.30813e-06	1.33114e-05	0.15679	0.0415399	0.500462	0.301208	UP_TGF
RAB42	1	110.45	1.3867	0.294372	4.71071	2.46855e-06	1.41464e-05	0.0858477	0.134929	0.509446	0.269778	UP_TGF
G6PC3	1	1063.51	-1.05848	0.224742	-4.70974	2.48033e-06	1.42089e-05	0.126351	4.85918e-05	0.790929	0.0826709	UP_BMP
YPEL2	1	2235.43	0.790741	0.168032	4.70589	2.52762e-06	1.44595e-05	0.325103	0.00108843	0.54819	0.125619	UP_TGF
AGPAT2	1	594.309	-0.77239	0.164444	-4.69699	2.64028e-06	1.50459e-05	0.312896	0.0144765	0.557428	0.1152	UP_BMP
SOX15	1	30.2881	2.82319	0.602551	4.68539	2.79422e-06	1.58787e-05	0.140785	0.0788898	0.489432	0.290893	UP_TGF
NAA10	1	2145.67	-0.746316	0.159725	-4.6725	2.97551e-06	1.67977e-05	0.103688	0.150654	0.494271	0.251387	UP_BMP
TTC21A	1	310.906	0.984929	0.211282	4.66169	3.13628e-06	1.76198e-05	0.205315	0.235919	0.401434	0.157332	UP_TGF
RNF130	1	1436.27	0.685822	0.147473	4.6505	3.31131e-06	1.85647e-05	0.0432334	0.0258184	0.483643	0.447305	UP_TGF
STEAP1B	1	209.162	-1.22853	0.265097	-4.63428	3.58189e-06	2.0006e-05	0.203904	0.192406	0.430988	0.172702	UP_BMP
GXYLT1	1	538.901	-0.869151	0.187617	-4.63257	3.6115e-06	2.01438e-05	0.130687	0.0284576	0.583051	0.257804	UP_BMP
HAAO	1	607.054	0.946261	0.204354	4.63051	3.64767e-06	2.03177e-05	0.387614	0.0842019	0.523522	0.004663	UP_TGF
ZIC2	1	215.537	1.3906	0.300742	4.62388	3.76623e-06	2.09495e-05	0.16711	0.148239	0.364056	0.320594	UP_TGF
R3HCC1	1	490.357	0.828662	0.179829	4.60806	4.06445e-06	2.24703e-05	0.315666	0.0417892	0.493069	0.149475	UP_TGF
CDC37L1	1	588.951	-0.765689	0.16715	-4.58084	4.6311e-06	2.54219e-05	0.133227	0.137719	0.652861	0.0761929	UP_BMP
CTNND2	1	29.6255	2.66455	0.583205	4.5688	4.90534e-06	2.68369e-05	0.270403	0.0084293	0.562274	0.158894	UP_TGF
DNALI1	1	175.792	1.31239	0.288542	4.54836	5.40661e-06	2.93723e-05	0.357689	0.0426156	0.519654	0.0800415	UP_TGF
TEAD1	1	1929.56	-0.585008	0.128959	-4.53639	5.72256e-06	3.09238e-05	0.000557519	0.00433401	0.858721	0.136387	UP_BMP
KIF23	1	781.592	-0.998804	0.221034	-4.51878	6.2197e-06	3.34219e-05	0.0256641	0.280509	0.533276	0.16055	UP_BMP
TAZ	1	760.598	0.911399	0.202452	4.5018	6.73804e-06	3.60256e-05	0.00525925	0.0540419	0.889366	0.0513324	UP_TGF
CTNNA1	1	9205.36	0.607485	0.135113	4.49614	6.91991e-06	3.69168e-05	0.107699	0.0258194	0.790621	0.0758604	UP_TGF
NT5DC2	1	3500.47	0.706028	0.157052	4.4955	6.94066e-06	3.70153e-05	0.011711	0.0266225	0.573318	0.388349	UP_TGF
PRR4	1	134.509	-1.24536	0.277063	-4.49485	6.96178e-06	3.71037e-05	0.0209098	0.0936684	0.552709	0.332713	UP_BMP
ACTR1B	1	1863.3	0.698871	0.155586	4.49186	7.06049e-06	3.75806e-05	0.244143	0.0204957	0.717127	0.0182345	UP_TGF
PPP1R3E	1	618.441	1.04504	0.232911	4.48686	7.22796e-06	3.84295e-05	0.326704	0.037075	0.357624	0.278597	UP_TGF
LSM14A	1	2063.09	0.546679	0.121932	4.48347	7.34376e-06	3.89992e-05	0.337711	0.0836722	0.43015	0.148467	UP_TGF
TNFRSF12A	1	831.903	1.40522	0.31514	4.45904	8.23286e-06	4.33675e-05	0.0878777	0.127595	0.756413	0.0281148	UP_TGF
CROCCP3	1	434.584	0.833876	0.187164	4.45532	8.37669e-06	4.40967e-05	0.349116	0.155564	0.476843	0.0184776	UP_TGF
CDS2	1	1795.81	-0.61825	0.138853	-4.45256	8.48528e-06	4.45819e-05	0.472663	0.0233423	0.491477	0.0125181	UP_BMP
HDAC6	1	1924.19	0.52922	0.119032	4.44601	8.7478e-06	4.58577e-05	0.4368	0.0186429	0.524628	0.0199291	UP_TGF
APOO	1	335.539	-0.922674	0.207749	-4.44129	8.94216e-06	4.68314e-05	0.225593	0.112577	0.404064	0.257766	UP_BMP
MEIS2	1	506.393	0.820619	0.185191	4.43121	9.37064e-06	4.89026e-05	0.0367799	0.208627	0.516757	0.237836	UP_TGF
CLASRP	1	841.101	0.697423	0.157625	4.42456	9.66381e-06	5.02715e-05	0.277135	0.0189941	0.394738	0.309132	UP_TGF
U2SURP	1	2462.76	-0.607375	0.137301	-4.42369	9.70282e-06	5.04423e-05	0.00124789	0.000903821	0.847598	0.150251	UP_BMP
SEPHS1	1	1439.76	0.56057	0.126768	4.42203	9.778e-06	5.08007e-05	0.048863	0.0795879	0.498273	0.373277	UP_TGF
GRK2	1	1471.87	0.839327	0.19009	4.41541	1.00819e-05	5.2263e-05	0.0586047	0.0200797	0.903643	0.0176722	UP_TGF
ARHGAP11A	1	531.499	1.36812	0.309896	4.41476	1.01123e-05	5.24037e-05	0.308579	0.0174074	0.621937	0.0520763	UP_TGF
ZDHHC11	1	140.61	-1.19926	0.271938	-4.41006	1.0334e-05	5.33998e-05	0.0957592	0.232975	0.591446	0.07982	UP_BMP
SNX18	1	2485.41	-0.589233	0.133816	-4.4033	1.06617e-05	5.49711e-05	0.117546	0.116486	0.623208	0.14276	UP_BMP
GTSE1	1	301.337	1.08125	0.245785	4.39918	1.08663e-05	5.59732e-05	0.21515	0.0334963	0.567844	0.183509	UP_TGF
TASP1	1	321.484	-0.916055	0.208551	-4.39248	1.12065e-05	5.75436e-05	0.104873	0.0569468	0.539661	0.29852	UP_BMP
NARF	1	968.376	1.06656	0.242866	4.39157	1.12534e-05	5.7712e-05	0.0643946	0.0759076	0.847211	0.0124863	UP_TGF
AP4B1	1	563.352	0.901647	0.205452	4.38861	1.14077e-05	5.84849e-05	0.0482546	0.144381	0.618791	0.188573	UP_TGF
BCAR1	1	2660.8	0.670565	0.153061	4.38103	1.18118e-05	6.04235e-05	0.165321	0.0488253	0.705474	0.0803806	UP_TGF
CALM1	1	4795.4	-0.699451	0.159903	-4.37421	1.21871e-05	6.2069e-05	0.0447112	0.182221	0.744326	0.0287411	UP_BMP
RASD1	1	72.4158	-2.50724	0.5749	-4.36118	1.29363e-05	6.56811e-05	0.00132348	0.0708755	0.485487	0.442314	UP_BMP
TEAD4	1	183.43	1.21128	0.278168	4.3545	1.33369e-05	6.75465e-05	0.185956	0.31085	0.482636	0.0205576	UP_TGF
ASB3	1	1348.95	-0.750642	0.172479	-4.35208	1.34852e-05	6.8213e-05	0.0466412	0.340151	0.48741	0.125798	UP_BMP
RUFY1	1	1222.46	0.604898	0.13973	4.32906	1.4975e-05	7.53048e-05	0.144774	0.237385	0.608062	0.00977886	UP_TGF
AGRN	1	2409	0.707918	0.164432	4.30522	1.6682e-05	8.31446e-05	0.0164647	0.0131464	0.963318	0.0070711	UP_TGF
RAB31	1	4612.58	-1.0811	0.251857	-4.2925	1.76674e-05	8.77342e-05	0.416082	0.00505421	0.531249	0.0476145	UP_BMP
TPD52L2	1	3925.95	-0.658656	0.153561	-4.28921	1.79307e-05	8.89876e-05	0.254848	0.00214233	0.486436	0.256574	UP_BMP
ELOB	1	1870.96	-0.889171	0.207348	-4.28831	1.8004e-05	8.9297e-05	0.206825	0.125519	0.365379	0.302278	UP_BMP
TRAPPC6A	1	225.645	-0.924347	0.215681	-4.28571	1.82158e-05	9.02922e-05	0.290371	0.0734115	0.540914	0.0953038	UP_BMP
CD300C	1	24.8578	-3.05736	0.713979	-4.28214	1.85103e-05	9.16129e-05	0.198515	0.116062	0.392419	0.293004	UP_BMP
DBP	1	118.843	1.78745	0.417485	4.28147	1.8566e-05	9.18326e-05	0.104505	0.024585	0.776414	0.0944955	UP_TGF
G3BP1	1	3909.95	-0.621506	0.145436	-4.27341	1.92506e-05	9.49307e-05	0.086547	0.0282395	0.477841	0.407372	UP_BMP
ZNF592	1	1839.14	0.601577	0.140864	4.27063	1.94925e-05	9.59495e-05	0.0290459	0.00892291	0.688403	0.273628	UP_TGF
TTYH2	1	173.225	1.20756	0.282982	4.26727	1.97881e-05	9.73751e-05	0.240464	0.0449468	0.546848	0.167742	UP_TGF
FKBP14	1	3299.56	-0.606392	0.142401	-4.25834	2.05948e-05	0.000100888	0.205316	0.038136	0.591629	0.16492	UP_BMP
PAQR4	1	165.822	1.14988	0.270127	4.25683	2.07343e-05	0.00010151	0.187614	0.0677518	0.442104	0.30253	UP_TGF
PISD	1	870.645	-0.767094	0.180286	-4.25487	2.09167e-05	0.000102342	0.0682802	0.0794039	0.525401	0.326915	UP_BMP
SLC23A3	1	186.072	1.02921	0.24216	4.25011	2.13667e-05	0.000104293	0.143812	0.00334348	0.759008	0.0938364	UP_TGF
DPF1	1	129.062	1.49483	0.351932	4.24749	2.16175e-05	0.000105359	0.395166	0.067833	0.45336	0.0836404	UP_TGF
CYP3A5	1	454.716	-1.18407	0.27881	-4.24685	2.16799e-05	0.000105601	0.00632427	0.147531	0.760614	0.08553	UP_BMP
FAM167B	1	22.5431	2.74387	0.647049	4.24059	2.22938e-05	0.00010831	0.0755104	0.0430814	0.592491	0.288917	UP_TGF
RING1	1	351.747	7.56507	1.7885	4.22984	2.33855e-05	0.000113198	0.00969146	0.227388	0.588061	0.17486	UP_TGF
SEL1L	1	4212.74	-0.696409	0.164785	-4.22616	2.3771e-05	0.000114791	0.139631	0.188945	0.396366	0.275058	UP_BMP
RPS6KB2	1	1244.6	-0.806774	0.190924	-4.22564	2.38265e-05	0.000114991	0.192164	0.0219807	0.456113	0.329743	UP_BMP
MYO10	1	2602.07	1.26703	0.300056	4.22264	2.41454e-05	0.000116324	0.160306	0.0216466	0.495003	0.323045	UP_TGF
TBX18	1	204.115	-1.22373	0.289976	-4.22012	2.44175e-05	0.00011753	0.106659	0.0461011	0.846362	0.000878206	UP_BMP
UMODL1	1	30.6426	3.21099	0.760994	4.21946	2.44884e-05	0.000117801	0.264751	0.0457039	0.470898	0.218647	UP_TGF
CHST3	1	17096.1	-0.625048	0.148487	-4.20944	2.56009e-05	0.000122755	0.153999	0.00520371	0.706317	0.134479	UP_BMP
MRPS23	1	519.138	-0.908136	0.215752	-4.20918	2.56304e-05	0.00012286	0.12457	0.144315	0.487629	0.243486	UP_BMP
PAFAH2	1	581.304	-0.669077	0.158999	-4.20807	2.57563e-05	0.000123391	0.257924	0.000127573	0.522982	0.218967	UP_BMP
DCP2	1	1021.94	-0.681584	0.162053	-4.20592	2.60019e-05	0.000124421	0.142159	0.165016	0.678283	0.0145409	UP_BMP
LANCL2	1	479.501	-1.23127	0.292865	-4.20421	2.61991e-05	0.000125328	0.440911	0.0148935	0.471916	0.0722794	UP_BMP
TTLL4	1	1073.62	0.609364	0.14499	4.20281	2.6362e-05	0.000126033	0.129775	0.000947438	0.631436	0.237842	UP_TGF
SGTB	1	652.386	-0.715085	0.170422	-4.19597	2.71711e-05	0.000129506	0.211391	0.179254	0.383693	0.225662	UP_BMP
NIFK	1	756.234	-0.708782	0.169062	-4.19244	2.75969e-05	0.000131398	0.0795693	0.0813448	0.709992	0.129094	UP_BMP
CCND1	1	5785.51	-0.776656	0.185879	-4.17828	2.93725e-05	0.000139323	0.00988938	0.0577558	0.635407	0.296947	UP_BMP
CSRNP3	1	432.335	-1.16868	0.279995	-4.17396	2.99356e-05	0.00014181	0.101367	0.0163876	0.665604	0.216642	UP_BMP
POP4	1	509.047	-0.765832	0.18348	-4.17392	2.99404e-05	0.00014181	0.313569	0.19673	0.466418	0.0232837	UP_BMP
APBA2	1	257.118	-0.937186	0.224545	-4.17372	2.99671e-05	0.000141813	0.146228	0.0362335	0.623662	0.193876	UP_BMP
SPCS3	1	2393.12	-0.717207	0.171839	-4.17372	2.99672e-05	0.000141813	0.108501	0.0514579	0.691308	0.148733	UP_BMP
GRINA	1	1098.19	-0.691753	0.165802	-4.17216	3.01721e-05	0.000142659	0.166309	0.0334369	0.534035	0.266219	UP_BMP
LBX2	1	64.5107	1.67299	0.401238	4.16957	3.05181e-05	0.000144169	0.0801535	0.360419	0.549757	0.00967047	UP_TGF
RNF141	1	609.824	-0.658417	0.157937	-4.16885	3.06134e-05	0.000144578	0.328417	0.00327792	0.587266	0.0810398	UP_BMP
TSC22D4	1	5125.39	-0.688599	0.165274	-4.16641	3.09439e-05	0.000146054	0.00287584	0.0403813	0.599724	0.357019	UP_BMP
CCT6P3	1	192.566	0.911437	0.219549	4.1514	3.30446e-05	0.000155339	0.155629	0.0562176	0.476084	0.312069	UP_TGF
JADE2	1	2971.4	-0.565432	0.136594	-4.13952	3.48037e-05	0.000162623	0.361011	0.00780891	0.511641	0.119539	UP_BMP
ACBD4	1	219.062	1.17456	0.283823	4.13834	3.49827e-05	0.000163413	0.00606475	0.123965	0.651678	0.218293	UP_TGF
TBX19	1	177.377	1.26344	0.307576	4.10775	3.99532e-05	0.000184359	0.116744	0.0280722	0.399815	0.455368	UP_TGF
C6orf223	1	231.66	-1.66393	0.405484	-4.10356	4.06845e-05	0.00018731	0.141582	0.107833	0.650801	0.0997831	UP_BMP
VILL	1	266.592	0.924428	0.226094	4.0887	4.338e-05	0.000199045	0.153527	0.0435663	0.383117	0.419789	UP_TGF
CDK2	1	766.589	0.728963	0.179132	4.06942	4.71312e-05	0.000214986	0.0380878	0.175342	0.709157	0.0774134	UP_TGF
NKIRAS2	1	1087.07	-0.745411	0.183236	-4.06803	4.74123e-05	0.00021611	0.461026	0.000165275	0.459019	0.0797899	UP_BMP
MDGA1	1	244.131	1.07513	0.264591	4.06335	4.83731e-05	0.000220035	0.16398	0.167949	0.516446	0.151624	UP_TGF
NOL3	1	685.403	0.960675	0.236443	4.06304	4.84385e-05	0.00022026	0.0544929	0.197475	0.63628	0.111752	UP_TGF
ZNF624	1	103.793	1.0645	0.262057	4.06211	4.86307e-05	0.00022096	0.10858	0.0801005	0.607822	0.203497	UP_TGF
DESI1	1	1896.36	-0.622054	0.15355	-4.05114	5.09683e-05	0.000230474	0.113367	0.0908238	0.49896	0.296849	UP_BMP
FDPS	1	7058.3	-0.839251	0.209208	-4.01156	6.03189e-05	0.00026941	2.4425e-05	0.00101077	0.772905	0.22606	UP_BMP
GAPDH	1	44810.9	0.866805	0.216331	4.00684	6.15369e-05	0.000274436	0.397498	0.0030434	0.552644	0.0468153	UP_TGF
FAH	1	932.906	-0.895505	0.223956	-3.99858	6.37246e-05	0.000283689	0.00842026	0.0750891	0.578506	0.337985	UP_BMP
PPP1R32	1	263.394	1.34372	0.337454	3.98195	6.83535e-05	0.000302431	0.00714199	0.00915494	0.906109	0.0775942	UP_TGF
ADAM11	1	47.6545	1.83331	0.460812	3.97844	6.93688e-05	0.000306638	0.157779	0.00189071	0.583962	0.256369	UP_TGF
SBNO2	1	1758.91	0.908934	0.228492	3.97797	6.95058e-05	0.00030716	0.164898	0.270566	0.486468	0.0780691	UP_TGF
RPE	1	801.048	-0.591337	0.148819	-3.97353	7.08154e-05	0.000312354	0.106205	0.0309223	0.413493	0.449379	UP_BMP
NIPSNAP2	1	971.181	0.67863	0.170802	3.9732	7.09134e-05	0.000312702	0.0273666	0.0465911	0.42244	0.503602	UP_TGF
MN1	1	3354.77	0.897688	0.226038	3.9714	7.14525e-05	0.000314739	0.00687611	0.323954	0.377834	0.291336	UP_TGF
FRY	1	3570	0.734348	0.184952	3.97047	7.17305e-05	0.000315878	5.05694e-05	0.0766442	0.807002	0.116303	UP_TGF
ZC3H15	1	1273.05	-0.525871	0.132626	-3.96505	7.33802e-05	0.000322445	0.0687964	0.338226	0.481363	0.111615	UP_BMP
ADPRH	1	315.416	-1.29231	0.325987	-3.96431	7.36082e-05	0.000323273	0.0154911	0.114606	0.603919	0.265984	UP_BMP
PHYKPL	1	1476.57	0.559731	0.141265	3.96228	7.42383e-05	0.000325865	0.127701	0.03298	0.467797	0.371522	UP_TGF
ATF7	1	2871.85	0.463732	0.117649	3.94165	8.09227e-05	0.000352358	0.204056	0.0648113	0.700611	0.0305217	UP_TGF
TPX2	1	702.72	1.05017	0.268349	3.91346	9.09822e-05	0.000391661	0.475445	0.00404015	0.508931	0.0115842	UP_TGF
ABCA1	1	1694.47	-1.08394	0.277518	-3.90583	9.39023e-05	0.00040253	0.0611545	0.0538626	0.841991	0.0429916	UP_BMP
EVC	1	3206	0.526752	0.134967	3.90282	9.50793e-05	0.000407362	0.266679	0.0430854	0.486666	0.20357	UP_TGF
CBWD5	1	558.504	-0.848102	0.217513	-3.89909	9.65533e-05	0.000413139	0.188124	0.0199795	0.746811	0.0450849	UP_BMP
LRRC75A	1	126.113	1.34802	0.345727	3.89909	9.65545e-05	0.000413139	0.217337	0.00740727	0.654788	0.120467	UP_TGF
CDCA3	1	144.867	1.28981	0.331413	3.89185	9.94817e-05	0.000424994	0.432938	0.0719659	0.421761	0.0733354	UP_TGF
ARL8B	1	1322.43	-0.540484	0.139063	-3.88661	0.000101653	0.000433475	0.162008	0.0717382	0.597429	0.168825	UP_BMP
EBP	1	742.899	-0.858432	0.220877	-3.88647	0.000101712	0.000433501	0.191045	0.00811938	0.608475	0.192361	UP_BMP
DLAT	1	658.404	-0.658276	0.169487	-3.88394	0.000102776	0.000437576	0.207749	0.000367921	0.78992	0.0019637	UP_BMP
MAGEF1	1	802.934	0.552079	0.142172	3.88317	0.000103106	0.000438745	0.0301574	0.383467	0.566654	0.0197219	UP_TGF
RUSC1-AS1	1	72.7952	1.27564	0.328625	3.88176	0.000103703	0.000440947	0.395874	0.112793	0.440682	0.0506514	UP_TGF
COPZ1	1	2682.36	-0.507922	0.130951	-3.87872	0.000105008	0.000446148	0.196976	0.096492	0.505763	0.200769	UP_BMP
CYB5R4	1	95.4962	-1.11844	0.288459	-3.87728	0.00010563	0.000448554	0.278505	0.121264	0.451376	0.148855	UP_BMP
ANXA2R	1	51.1185	1.5802	0.408338	3.86983	0.000108909	0.000461639	0.0798767	0.0634337	0.856598	9.13375e-05	UP_TGF
UBE2W	1	656.92	-0.845407	0.218998	-3.86033	0.000113233	0.00047835	0.0487345	0.0412969	0.626956	0.283013	UP_BMP
AASDHPPT	1	732.521	-0.650308	0.168638	-3.85624	0.000115146	0.000485803	0.209237	0.0582905	0.468571	0.263902	UP_BMP
C1QTNF7	1	399.676	-1.36238	0.353485	-3.85413	0.000116142	0.000489244	0.0698076	0.00223778	0.513057	0.414898	UP_BMP
PTPN4	1	479.525	-0.970108	0.252033	-3.84913	0.000118539	0.000498825	0.053244	0.0372542	0.796742	0.11276	UP_BMP
ANKRD18CP	1	61.831	-1.69318	0.44038	-3.84483	0.000120637	0.000506616	0.0257214	0.0180287	0.725328	0.230922	UP_BMP
PSMB7	1	1873.94	-0.524972	0.13654	-3.84482	0.000120639	0.000506616	0.118834	0.218061	0.465852	0.197254	UP_BMP
NDUFAF3	1	981.416	-0.834381	0.217563	-3.83513	0.0001255	0.000525268	0.195557	0.010607	0.591132	0.202704	UP_BMP
NCAM1	1	1148.31	-0.668884	0.174431	-3.83467	0.000125732	0.00052597	0.158936	0.0602271	0.57954	0.201297	UP_BMP
TBX6	1	90.1159	1.3617	0.355135	3.83431	0.000125918	0.00052648	0.0480678	0.137886	0.797959	0.0160879	UP_TGF
CHAC2	1	133.202	-1.62926	0.42592	-3.82526	0.000130633	0.000544378	0.00589846	0.263998	0.508873	0.221231	UP_BMP
CHST11	1	4908.01	-0.881871	0.231388	-3.81122	0.000138281	0.00057419	0.118814	0.0555207	0.524267	0.301398	UP_BMP
IPO7	1	4887.21	0.621446	0.163335	3.80473	0.000141957	0.000588407	0.0225818	0.170451	0.608481	0.198487	UP_TGF
SUCO	1	1935.72	-0.533842	0.140967	-3.78701	0.000152474	0.000626739	0.00699195	0.0256717	0.616805	0.350531	UP_BMP
KCNC3	1	472.281	0.775277	0.204756	3.78635	0.000152878	0.000628241	0.0800819	0.0521702	0.606802	0.260945	UP_TGF
PIF1	1	247.216	0.873536	0.230731	3.78595	0.000153123	0.000628773	0.0236339	0.00920366	0.61623	0.350933	UP_TGF
SESN2	1	849.347	-0.543047	0.143589	-3.78196	0.000155599	0.000637975	0.068772	0.342882	0.370966	0.21738	UP_BMP
ZBTB7C	1	84.3532	2.0192	0.534377	3.7786	0.000157713	0.000645669	0.137656	0.201501	0.565799	0.0950442	UP_TGF
SLC36A4	1	475.898	-0.683512	0.181361	-3.7688	0.000164032	0.000669519	0.00495755	0.218619	0.702873	0.0735505	UP_BMP
OSGIN2	1	402.973	0.609772	0.161862	3.76724	0.00016506	0.000673212	0.14435	0.261171	0.334228	0.260251	UP_TGF
JUNB	1	2978.2	0.963101	0.25573	3.76608	0.00016583	0.000676011	0.471075	0.0140863	0.485643	0.0291954	UP_TGF
PPP1R3B	1	2044.9	0.50455	0.133995	3.76544	0.000166259	0.000677085	0.165588	1.35487e-05	0.831613	0.0027861	UP_TGF
TRIM6	1	234.597	-1.02541	0.272481	-3.76325	0.00016772	0.000682693	0.238615	0.027895	0.602399	0.131092	UP_BMP
PRKCZ	1	872.026	0.588166	0.15641	3.76041	0.000169633	0.000690136	0.268285	0.0550752	0.485514	0.191126	UP_TGF
RNF112	1	78.7744	1.32716	0.353022	3.75943	0.000170301	0.000692335	0.011056	0.0459113	0.913438	0.0295948	UP_TGF
ZBTB44	1	1182.93	-0.545641	0.145264	-3.7562	0.000172516	0.000700988	0.247919	0.0228341	0.401488	0.32776	UP_BMP
GPATCH4	1	436.278	-1.10197	0.29423	-3.74527	0.000180198	0.000729657	0.00188459	0.0755638	0.918735	0.00381611	UP_BMP
GNB4	1	2055.41	-0.900006	0.240547	-3.7415	0.000182926	0.000738822	0.171936	0.205263	0.453126	0.169676	UP_BMP
PLEKHB1	1	157.933	1.28421	0.344037	3.73279	0.000189373	0.000762829	0.193261	0.230867	0.280699	0.295172	UP_TGF
FRS2	1	1092.71	-0.697916	0.187327	-3.72565	0.000194811	0.000782809	0.313124	0.0310549	0.509647	0.146175	UP_BMP
EMC6	1	459.989	-0.729513	0.19592	-3.72353	0.000196458	0.000788639	0.355346	0.12817	0.433642	0.0828418	UP_BMP
PPM1F	1	1407.47	0.525985	0.141444	3.71867	0.000200272	0.000801974	0.0663185	0.0259003	0.414572	0.493209	UP_TGF
C4orf47	1	73.4258	2.03815	0.548556	3.71547	0.000202823	0.000811193	0.0022343	0.0671715	0.414703	0.515891	UP_TGF
CD2BP2	1	1395.2	-0.572336	0.154228	-3.71097	0.000206467	0.000824756	0.0792224	0.297551	0.341815	0.281411	UP_BMP
ADAMTS2	1	7577.99	-0.766985	0.206742	-3.70987	0.000207364	0.00082773	0.0488813	0.0443664	0.540018	0.366734	UP_BMP
SUSD2	1	31.2	-2.30801	0.622413	-3.70817	0.000208766	0.000832712	0.00052618	0.0516772	0.676824	0.270973	UP_BMP
RRNAD1	1	604.499	0.735155	0.198583	3.70199	0.000213911	0.000851361	0.00488981	0.00521777	0.962104	0.027788	UP_TGF
MBNL1	1	6824.1	-0.494472	0.133599	-3.70116	0.000214615	0.000853122	0.00208488	0.335714	0.613273	0.0489288	UP_BMP
POLR2L	1	981.579	-0.972551	0.263433	-3.69184	0.000222642	0.000882231	0.0561736	0.119231	0.538616	0.28598	UP_BMP
ST6GAL1	1	1090.04	0.870673	0.236778	3.67718	0.000235828	0.000930186	0.323996	0.0939103	0.414421	0.167673	UP_TGF
ZSCAN31	1	53.086	1.31686	0.358471	3.67354	0.000239209	0.000941924	0.221024	0.0469495	0.695205	0.0368222	UP_TGF
IL18BP	1	360.844	0.676224	0.18489	3.65744	0.000254745	0.00099711	0.0454592	0.0277193	0.876901	0.049921	UP_TGF
VPS37B	1	1696.61	-0.517898	0.141601	-3.65743	0.000254753	0.00099711	0.377924	0.0747006	0.483856	0.0635196	UP_BMP
ZC3H7A	1	2395.24	0.616108	0.168451	3.65748	0.000254702	0.00099711	0.278141	0.0348801	0.374673	0.312306	UP_TGF
PGAP1	1	703.554	0.774204	0.2127	3.63988	0.000272763	0.00106123	0.196804	0.224986	0.327856	0.250354	UP_TGF
KCNG1	1	217.476	-1.40884	0.38712	-3.6393	0.000273385	0.00106314	0.118557	0.0863444	0.602474	0.192625	UP_BMP
EML2	1	540.841	-0.672464	0.185653	-3.62215	0.000292162	0.00112889	0.0208008	0.00174858	0.958902	0.0185485	UP_BMP
TM7SF2	1	159.553	1.01755	0.280938	3.62196	0.000292379	0.00112919	0.300289	0.0847145	0.600742	0.0142536	UP_TGF
BTBD11	1	514.05	1.11056	0.307607	3.61031	0.000305829	0.00117779	0.304275	0.030893	0.491734	0.173098	UP_TGF
KLF3-AS1	1	239.695	1.06412	0.295209	3.60464	0.000312591	0.00120213	0.327842	0.108079	0.464425	0.0996541	UP_TGF
CSF1	1	286.868	-1.13447	0.314751	-3.60433	0.000312955	0.00120324	0.27534	0.000380574	0.392119	0.332161	UP_BMP
RNF44	1	1064.33	0.764736	0.212706	3.59528	0.000324048	0.00124267	0.00370007	0.0249624	0.790669	0.180668	UP_TGF
TBXA2R	1	219.957	1.0466	0.291469	3.59076	0.000329717	0.00126203	0.0632698	0.014965	0.46068	0.461085	UP_TGF
MED13	1	2068.67	-0.50949	0.14191	-3.59022	0.000330398	0.00126434	0.0339193	0.0132226	0.929629	0.0232287	UP_BMP
BOLA3-AS1	1	130.644	1.14332	0.318926	3.58492	0.000337176	0.00128695	0.0576827	0.209717	0.539374	0.193227	UP_TGF
EVI5L	1	785.429	-0.790682	0.220837	-3.58038	0.000343096	0.00130741	0.183831	0.0211708	0.714191	0.0808075	UP_BMP
FAM72A	1	87.4849	-1.27378	0.355838	-3.57967	0.000344031	0.00131005	0.371869	0.00192436	0.611547	0.0146599	UP_BMP
FCGRT	1	2005.79	0.700459	0.195749	3.57836	0.000345761	0.00131572	0.314059	0.161577	0.445373	0.0789904	UP_TGF
PPARG	1	121.813	-0.988478	0.276496	-3.57502	0.0003502	0.00133074	0.0404279	0.21006	0.707968	0.0415443	UP_BMP
SLC9A6	1	1280.13	-0.490968	0.137422	-3.5727	0.000353323	0.00134199	0.0770002	0.279108	0.495867	0.148024	UP_BMP
WDR45B	1	2022.4	0.526064	0.147363	3.56986	0.000357175	0.00135535	0.0436883	0.0717366	0.509362	0.375214	UP_TGF
SLC28A3	1	16.6182	-2.50012	0.700639	-3.56835	0.000359242	0.00136193	0.274205	0.0803191	0.458218	0.187258	UP_BMP
SLC25A30	1	528.308	-0.666432	0.187003	-3.56375	0.000365596	0.00138431	0.286886	0.00167558	0.55235	0.159088	UP_BMP
UBE2E2	1	389.988	-0.756211	0.212284	-3.56226	0.000367671	0.00139129	0.151442	0.314696	0.525183	0.00867877	UP_BMP
PI4K2A	1	965.718	-0.705745	0.198574	-3.55406	0.000379332	0.00143176	0.0453158	0.0184524	0.645431	0.290801	UP_BMP
MPND	1	250.413	-0.825637	0.232439	-3.55206	0.000382222	0.00144067	0.0334418	0.0821987	0.63078	0.25358	UP_BMP
SNX33	1	1370.13	0.583253	0.164342	3.54903	0.000386657	0.00145519	0.224227	0.00420993	0.723187	0.048376	UP_TGF
QPCTL	1	625.092	-0.704573	0.198658	-3.54666	0.000390148	0.00146749	0.286046	0.161697	0.509102	0.0431544	UP_BMP
MME	1	622.67	-2.47543	0.697976	-3.54659	0.000390255	0.00146755	0.153798	0.130183	0.424026	0.291993	UP_BMP
PGM3	1	3045.31	-0.571401	0.161489	-3.53833	0.000402661	0.00150863	0.140823	0.0339745	0.594697	0.230505	UP_BMP
UBL4A	1	645.969	0.633387	0.179034	3.53781	0.00040346	0.00151128	0.059951	0.311251	0.582599	0.0461991	UP_TGF
KIAA2013	1	1543.1	0.704936	0.199323	3.53666	0.000405226	0.00151698	0.0972068	0.134029	0.502732	0.266032	UP_TGF
LSP1	1	505.535	1.28463	0.363508	3.53399	0.000409334	0.00153152	0.213792	0.0024206	0.630413	0.153375	UP_TGF
SRGAP3	1	348.122	0.832327	0.235639	3.53221	0.000412106	0.00154119	0.125487	0.242502	0.340803	0.291208	UP_TGF
ARHGEF17	1	3973.7	0.591159	0.168312	3.51228	0.00044428	0.00165053	0.00254613	0.0751835	0.902344	0.0199268	UP_TGF
COX8A	1	1278.8	-0.610375	0.174367	-3.50052	0.000464344	0.00171374	0.163101	0.227606	0.590784	0.0185092	UP_BMP
RHOBTB1	1	1702.7	-0.517064	0.147765	-3.49923	0.000466612	0.00172016	0.273898	0.0168034	0.660292	0.049007	UP_BMP
GCNT1	1	5182.83	-0.442501	0.126547	-3.49673	0.000470997	0.00173515	0.192197	0.0128893	0.783245	0.0116686	UP_BMP
CPEB2	1	454.319	-0.973409	0.278504	-3.49513	0.000473826	0.00174439	0.100408	0.089438	0.723696	0.0864579	UP_BMP
CCT4	1	3627.02	-0.48803	0.140037	-3.48501	0.000492117	0.0018048	0.000174036	0.125212	0.654232	0.220382	UP_BMP
MRPL58	1	262.294	-0.734873	0.210958	-3.4835	0.0004949	0.00181419	0.083044	0.0428315	0.806449	0.0676753	UP_BMP
TCF12	1	2131.5	0.442733	0.127195	3.48074	0.000500029	0.0018297	0.00094074	0.117093	0.731407	0.150559	UP_TGF
SLC38A2	1	16670.8	-0.666331	0.191713	-3.47567	0.000509583	0.00185965	0.158882	0.132399	0.558377	0.150341	UP_BMP
ESPL1	1	287.486	1.17435	0.338853	3.46566	0.00052894	0.00192382	0.219233	0.013359	0.627738	0.13967	UP_TGF
SHB	1	145.275	1.03107	0.298565	3.45341	0.000553548	0.0020075	0.00383804	0.0103473	0.747903	0.237912	UP_TGF
ATG13	1	1941.56	-0.514263	0.149223	-3.44627	0.000568379	0.00205535	0.289531	0.0535596	0.487228	0.169682	UP_BMP
GTF2A1	1	1011.97	-0.563179	0.163482	-3.44489	0.000571285	0.00206497	0.023814	9.9589e-05	0.770322	0.205764	UP_BMP
RBM7	1	873.054	0.596342	0.173245	3.44218	0.000577036	0.00208341	0.213507	0.0189117	0.746215	0.0213662	UP_TGF
SLX1A	1	261.385	0.811072	0.235786	3.43986	0.000582008	0.00209858	0.175105	0.0918654	0.704161	0.0288689	UP_TGF
SLC26A2	1	9192.04	-0.725184	0.211042	-3.43621	0.000589923	0.0021243	0.0209338	0.039953	0.857655	0.0814584	UP_BMP
ABCB9	1	578.977	-0.626682	0.182883	-3.42668	0.000611013	0.00219442	0.0337473	0.0558552	0.607546	0.302851	UP_BMP
SEC11A	1	3947.93	0.450338	0.13153	3.42385	0.000617415	0.00221498	0.0225975	0.00147772	0.67264	0.303284	UP_TGF
SPG7	1	2553.91	0.517304	0.151395	3.41691	0.000633357	0.00226967	0.0867666	0.00231024	0.903202	0.00772132	UP_TGF
CABLES1	1	345.065	0.88042	0.258135	3.4107	0.00064796	0.0023164	0.426115	0.107115	0.463182	0.00358799	UP_TGF
RAB20	1	116.879	1.27008	0.37277	3.40715	0.000656459	0.00234118	0.0437575	0.143332	0.725409	0.0875017	UP_TGF
GADD45G	1	104.408	1.3127	0.385422	3.40588	0.000659511	0.00235099	0.000818124	0.148266	0.690825	0.160091	UP_TGF
ARHGEF39	1	225.08	1.07224	0.315355	3.4001	0.000673603	0.00239494	0.129172	0.0165588	0.528631	0.325638	UP_TGF
UBE2C	1	210.402	1.21796	0.358316	3.39911	0.000676047	0.00240258	0.286668	0.0075172	0.565416	0.140399	UP_TGF
RILP	1	79.4689	-1.10715	0.326161	-3.3945	0.000687535	0.00243862	0.0354603	0.25522	0.634675	0.0746441	UP_BMP
LUC7L3	1	3925.17	0.620708	0.183344	3.38548	0.000710533	0.00251253	0.280753	0.0548414	0.655621	0.0087855	UP_TGF
NECAP2	1	1319.21	-0.495206	0.146599	-3.37795	0.000730273	0.00257619	0.451932	0.0177572	0.458395	0.0719157	UP_BMP
ELAC2	1	1549.27	-0.814891	0.241362	-3.37622	0.000734889	0.00259191	0.126777	0.00363421	0.737804	0.131785	UP_BMP
MRPL12	1	519.737	-0.709689	0.210779	-3.36698	0.000759951	0.00267048	0.274181	0.0271037	0.453579	0.245136	UP_BMP
SLC1A3	1	165.427	1.27706	0.379406	3.36596	0.00076279	0.0026793	0.0856801	0.00164221	0.584083	0.328595	UP_TGF
EIF2AK2	1	2107.59	-0.434016	0.128965	-3.36538	0.000764392	0.00268377	0.0592098	0.0902608	0.476371	0.374158	UP_BMP
MRPL24	1	600.283	-0.643585	0.191479	-3.36113	0.000776242	0.00272244	0.0683755	0.0156674	0.882403	0.0335541	UP_BMP
MRPL20	1	1282.48	-0.633201	0.188502	-3.35912	0.000781904	0.00273935	0.172531	0.0262599	0.623122	0.178087	UP_BMP
TK2	1	1192.71	0.697789	0.207777	3.35836	0.000784078	0.00274638	0.1479	0.0581174	0.34208	0.451903	UP_TGF
HOOK1	1	14.8053	-2.93191	0.873304	-3.35726	0.000787177	0.00275487	0.0068541	0.215353	0.710931	0.0668613	UP_BMP
MTIF2	1	844.223	-0.562487	0.167686	-3.3544	0.000795386	0.00278061	0.0417076	0.149597	0.508651	0.300044	UP_BMP
AP1S1	1	792.615	-0.523	0.155923	-3.35421	0.000795911	0.00278185	0.00324281	0.0402536	0.75342	0.203084	UP_BMP
HLTF	1	975.589	-0.528195	0.157812	-3.34698	0.000816967	0.00284689	0.0699316	0.0940431	0.729188	0.106837	UP_BMP
HNRNPAB	1	2784.45	-0.74032	0.22129	-3.34547	0.000821425	0.00285708	0.127425	0.0533437	0.817284	0.00194751	UP_BMP
RSF1	1	2078.98	-0.567695	0.169691	-3.34546	0.000821468	0.00285708	0.0443746	0.0869818	0.57555	0.293093	UP_BMP
MATN4	1	5928.39	-0.894118	0.267404	-3.3437	0.000826682	0.00287276	1.99889e-05	0.233061	0.657608	0.109311	UP_BMP
NAT10	1	1263.17	-0.54811	0.163923	-3.34371	0.000826673	0.00287276	0.0514553	0.0204887	0.682086	0.245971	UP_BMP
LTB4R2	1	455.828	0.689082	0.20617	3.34229	0.000830888	0.00288553	0.0324155	0.00764454	0.483169	0.476771	UP_TGF
TWSG1	1	3304.84	-0.52312	0.156577	-3.34098	0.000834829	0.00289737	0.477363	0.0263884	0.48732	0.00892906	UP_BMP
ABCG2	1	21.5287	-2.3804	0.714711	-3.33058	0.000866663	0.00300274	0.112265	0.00402544	0.822555	0.0611539	UP_BMP
IDUA	1	752.843	0.521638	0.15662	3.33059	0.000866626	0.00300274	0.151879	0.00070009	0.693435	0.153986	UP_TGF
CLCNKB	1	39.2453	1.55273	0.467857	3.31881	0.000904012	0.00312285	0.138726	0.218587	0.554298	0.0883897	UP_TGF
MYH10	1	5460.15	0.410688	0.124339	3.30297	0.000956649	0.00328795	0.135085	0.00655266	0.63163	0.226732	UP_TGF
ITGB1BP1	1	1093.87	0.566622	0.172168	3.29111	0.000997936	0.00341473	0.17455	0.0380098	0.566567	0.220873	UP_TGF
SLF2	1	1296.74	-0.615083	0.186969	-3.28976	0.00100274	0.00342829	0.0991925	0.112924	0.561913	0.22597	UP_BMP
FAM160A1	1	986.337	-0.908193	0.276112	-3.28921	0.00100467	0.00343346	0.0147875	0.144198	0.515928	0.325086	UP_BMP
PPAT	1	363.049	-0.550211	0.167514	-3.28456	0.00102141	0.00348481	0.189559	0.000136147	0.647244	0.163061	UP_BMP
WDR59	1	1275.52	0.53863	0.164182	3.28069	0.00103552	0.00352777	0.038628	0.0483533	0.746215	0.166803	UP_TGF
CENPN	1	217.481	0.754669	0.230207	3.27822	0.00104464	0.00355588	0.00571121	0.0467468	0.653288	0.294254	UP_TGF
SSH3	1	646.241	-0.676427	0.206431	-3.27677	0.00105003	0.00357199	0.446236	0.0347783	0.441465	0.0775204	UP_BMP
ROMO1	1	656.155	-0.67726	0.206792	-3.27508	0.00105633	0.00359192	0.261907	0.015322	0.451208	0.271564	UP_BMP
MTERF2	1	563.443	-0.741894	0.226551	-3.27474	0.0010576	0.00359412	0.423349	0.0895528	0.423229	0.0638687	UP_BMP
TMEM155	1	15.5127	-2.26499	0.691635	-3.27484	0.00105724	0.00359412	0.22733	0.0127904	0.755698	0.00418171	UP_BMP
NOTCH1	1	693.754	0.523283	0.160097	3.26854	0.00108105	0.00366678	0.371503	0.0450644	0.573851	0.00958156	UP_TGF
C2CD2L	1	416.35	-0.664417	0.203345	-3.26744	0.00108524	0.00368024	0.412223	0.148067	0.416883	0.0228274	UP_BMP
ARID3A	1	314.791	-0.772559	0.236568	-3.2657	0.00109193	0.00370139	0.00822872	0.0752001	0.793221	0.12335	UP_BMP
CGAS	1	204.589	0.765479	0.234557	3.26351	0.0011004	0.00372627	0.0490874	0.217446	0.70932	0.0241456	UP_TGF
UBE4A	1	2305.44	-0.437955	0.134257	-3.26207	0.00110604	0.00374297	0.249593	0.0985585	0.402195	0.249654	UP_BMP
SLC39A3	1	479.43	-0.848521	0.260217	-3.26082	0.0011109	0.00375399	0.310897	0.125192	0.436782	0.12713	UP_BMP
SELENOO	1	534.168	0.621309	0.191213	3.2493	0.00115688	0.00389563	0.430272	0.0161483	0.460664	0.0929156	UP_TGF
HPS1	1	1017.84	-0.449963	0.1388	-3.2418	0.00118777	0.00398976	0.1542	0.0889855	0.653937	0.102878	UP_BMP
NIPAL1	1	165.197	-1.02451	0.316579	-3.23618	0.00121139	0.00406073	0.0999489	0.0702381	0.506181	0.323632	UP_BMP
RNF103	1	1432	-0.472266	0.14619	-3.23049	0.0012358	0.00413404	0.0323979	0.0888871	0.843323	0.0353922	UP_BMP
CD63	1	11802.7	0.611913	0.189752	3.2248	0.00126062	0.00420672	0.0411269	0.0563975	0.874145	0.0283303	UP_TGF
PRPF18	1	400.536	-0.665444	0.206375	-3.22443	0.00126222	0.00421119	0.0049925	0.0506242	0.756241	0.188142	UP_BMP
TMEM14A	1	305.466	-0.71412	0.22185	-3.21893	0.00128668	0.00428491	0.472356	0.0698684	0.424427	0.0333485	UP_BMP
PTPN6	1	127.667	-1.30259	0.40551	-3.21223	0.00131709	0.00437635	0.247541	0.193768	0.554176	0.00451561	UP_BMP
ZNF596	1	138.691	0.799097	0.248969	3.20963	0.00132905	0.00441248	0.0465787	0.000123955	0.567851	0.385447	UP_TGF
TLN1	1	10396.8	0.404891	0.126184	3.20873	0.00133324	0.0044228	0.131923	0.217044	0.6179	0.0331339	UP_TGF
TP53BP2	1	1070.9	0.536087	0.16729	3.20454	0.00135278	0.00448304	0.0802746	0.0213438	0.656097	0.242285	UP_TGF
ZNF675	1	159.314	-0.859795	0.268301	-3.20459	0.00135254	0.00448304	0.312348	0.0519812	0.511088	0.124583	UP_BMP
C3orf18	1	465.505	0.724653	0.226425	3.20041	0.00137233	0.0045423	0.0961237	0.188067	0.657281	0.0585282	UP_TGF
RAP1A	1	1392.73	-0.455788	0.142745	-3.19303	0.00140788	0.0046477	0.115836	0.0352151	0.758605	0.0903431	UP_BMP
TRAP1	1	1580.1	0.497414	0.155875	3.19112	0.00141724	0.00467481	0.217298	0.0909168	0.540511	0.151274	UP_TGF
BOLA2-SMG1P6	1	485.834	-0.758433	0.23774	-3.19018	0.00142183	0.004688	0.128352	0.00899388	0.847791	0.0148632	UP_BMP
SRPRB	1	2316.72	-0.850192	0.267015	-3.18406	0.00145225	0.00477481	0.211796	0.00536617	0.706442	0.0763952	UP_BMP
PSMA5	1	1565.13	-0.558531	0.175479	-3.18289	0.00145815	0.00479229	0.110006	0.311845	0.508219	0.0699296	UP_BMP
TPT1	1	88783.9	0.465474	0.146554	3.17613	0.00149254	0.00489348	0.138423	0.000850093	0.46323	0.397497	UP_TGF
SCARB1	1	3510.75	0.628762	0.1983	3.17077	0.00152037	0.00497603	0.184024	0.21072	0.388333	0.216922	UP_TGF
MR1	1	1251.17	-0.556816	0.175727	-3.16865	0.0015315	0.00500509	0.29229	7.33121e-05	0.701442	0.00619495	UP_BMP
LUM	1	13722.3	0.484382	0.15288	3.16837	0.00153295	0.00500601	0.166664	0.0939835	0.736597	0.00275489	UP_TGF
MRPS15	1	966.301	-0.501258	0.158203	-3.16844	0.0015326	0.00500601	0.15362	0.00292561	0.818804	0.0246507	UP_BMP
STC2	1	5408.81	-1.8149	0.572821	-3.16836	0.00153301	0.00500601	0.140048	0.0259316	0.803701	0.0303202	UP_BMP
FADS2	1	11975.4	0.737516	0.233211	3.16244	0.00156452	0.00509565	0.147976	0.28595	0.372143	0.193931	UP_TGF
ATP7A	1	954.508	-0.562543	0.178268	-3.15561	0.00160165	0.00520617	0.0133154	0.0205864	0.665958	0.30014	UP_BMP
PROM2	1	153.196	1.49721	0.47515	3.15103	0.00162694	0.00527575	0.00783743	0.125132	0.564837	0.302193	UP_TGF
PDZD8	1	1538.01	-0.41424	0.131759	-3.14393	0.00166697	0.0053916	0.0807934	0.263027	0.497201	0.158978	UP_BMP
NPNT	1	530.368	-1.27599	0.406817	-3.13653	0.0017096	0.00551525	0.0176773	0.0704357	0.428883	0.483004	UP_BMP
AASDH	1	382.919	-0.742997	0.237796	-3.12451	0.00178101	0.00571619	0.110193	0.0263453	0.436614	0.426848	UP_BMP
FKBP3	1	1393.3	-0.524302	0.167819	-3.12421	0.00178284	0.00572097	0.231376	0.0270573	0.589205	0.152362	UP_BMP
CSRNP1	1	648.482	0.726826	0.233445	3.11348	0.00184897	0.00591022	0.00123477	0.207209	0.646837	0.144719	UP_TGF
CMTM6	1	1172.53	-0.588767	0.189143	-3.11281	0.00185316	0.00591868	7.91963e-05	0.000621576	0.993758	0.00554103	UP_BMP
FNDC3A	1	2914.38	-0.404249	0.129966	-3.11042	0.00186823	0.00596209	0.0444371	0.0731238	0.401077	0.481362	UP_BMP
POLG	1	1890.1	0.478047	0.15397	3.10481	0.00190401	0.00605611	0.000123844	0.0537495	0.765893	0.180233	UP_TGF
ANKRD37	1	135.541	1.17514	0.378533	3.10445	0.00190632	0.00606227	0.244418	0.0922424	0.409007	0.254332	UP_TGF
SKA3	1	76.1626	1.14081	0.367516	3.10412	0.00190848	0.00606795	0.00154648	0.085095	0.546706	0.366653	UP_TGF
IER5L	1	618.989	0.718701	0.23207	3.09691	0.00195549	0.00620754	0.18022	0.0441309	0.735248	0.0404011	UP_TGF
ARPC5L	1	620.773	-0.573161	0.185283	-3.09343	0.0019786	0.00627501	0.0510468	0.237964	0.628031	0.0829584	UP_BMP
CSPP1	1	479.798	-0.528579	0.171026	-3.09063	0.00199734	0.00632582	5.70274e-06	0.305638	0.645337	0.0490194	UP_BMP
AKR1C3	1	19.5763	1.90069	0.616198	3.08455	0.00203858	0.00644141	0.0834873	0.171198	0.607195	0.13812	UP_TGF
KDM8	1	91.0264	1.14591	0.371573	3.08393	0.00204288	0.00644998	0.000203937	0.23446	0.602755	0.162581	UP_TGF
VEZF1	1	888.991	0.422957	0.137439	3.07742	0.00208802	0.00657469	0.0415271	0.289872	0.391995	0.276606	UP_TGF
YY1AP1	1	1564.12	0.430435	0.14047	3.06426	0.00218211	0.00684054	0.377062	0.0226528	0.52673	0.073555	UP_TGF
ZNF14	1	161.836	0.754021	0.246639	3.05718	0.00223431	0.00698671	0.00150918	0.0586299	0.680526	0.259335	UP_TGF
ASB6	1	546.751	-0.613239	0.200902	-3.05242	0.00227004	0.00709029	0.068532	0.0454972	0.584066	0.301905	UP_BMP
ATAT1	1	298.973	0.78219	0.256335	3.05143	0.00227752	0.00711092	0.360094	0.013072	0.583597	0.0432363	UP_TGF
ATP2A1	1	38.4151	-1.39102	0.456256	-3.04877	0.00229783	0.00716061	0.226242	0.124823	0.571042	0.0778922	UP_BMP
PIM1	1	539.199	0.691975	0.227641	3.03977	0.00236758	0.0073639	0.0721733	0.161504	0.759109	0.00721333	UP_TGF
EFNA2	1	24.0492	1.86533	0.61378	3.03908	0.00237301	0.00737937	0.286652	0.0335728	0.558556	0.12122	UP_TGF
CCDC43	1	437.37	-0.545623	0.179796	-3.03468	0.00240789	0.00747644	0.114211	0.14963	0.612447	0.123712	UP_BMP
AUP1	1	1982.13	0.451265	0.148775	3.03321	0.00241969	0.00750877	0.365174	0.0989335	0.492005	0.0438874	UP_TGF
FRMD4B	1	2295.14	0.655423	0.216098	3.03299	0.00242143	0.00751276	0.0338701	0.155765	0.727303	0.0830616	UP_TGF
PPP4R2	1	1471.46	-0.379511	0.125132	-3.03289	0.00242222	0.00751377	0.225563	0.000112801	0.694633	0.0796921	UP_BMP
MMP19	1	267.251	0.829434	0.27349	3.03277	0.00242317	0.00751528	0.0560328	0.336969	0.398599	0.208399	UP_TGF
PSMD3	1	2809.75	-0.46628	0.153831	-3.03112	0.00243646	0.0075522	0.00468357	0.00406687	0.921541	0.0697082	UP_BMP
IRF2BP2	1	3159.65	-0.538265	0.177939	-3.025	0.00248634	0.00768924	0.159804	0.0113246	0.818825	0.010046	UP_BMP
PPARD	1	1716.4	0.461468	0.152693	3.0222	0.00250947	0.00775048	0.173696	0.0344539	0.4426	0.349251	UP_TGF
DDR2	1	3809.64	0.475768	0.157512	3.02052	0.00252345	0.00778777	0.0176557	0.0979462	0.649862	0.234536	UP_TGF
KBTBD11	1	548.168	1.24154	0.411106	3.01998	0.00252787	0.00779846	0.0703418	0.010878	0.916294	0.00248603	UP_TGF
ULK4P1	1	20.8293	1.82614	0.60485	3.01916	0.00253475	0.00781673	0.336801	0.0248599	0.576895	0.0614441	UP_TGF
DLG1	1	2631.36	0.540921	0.17943	3.01466	0.00257264	0.00792458	0.179319	0.157354	0.489153	0.174174	UP_TGF
SRI	1	1159.13	0.548207	0.182093	3.01058	0.00260751	0.0080138	0.0774768	0.297804	0.362095	0.262624	UP_TGF
SNRNP27	1	524.301	-0.449272	0.149424	-3.00669	0.00264113	0.00810337	0.0297384	0.192982	0.77107	0.00620927	UP_BMP
SLC16A7	1	112.346	-1.23868	0.41218	-3.00518	0.00265421	0.00813126	0.00829949	0.104169	0.805994	0.0815379	UP_BMP
EVL	1	1268.13	0.547399	0.182157	3.00509	0.002655	0.00813164	0.435924	0.0974399	0.465543	0.00109341	UP_TGF
CD81-AS1	1	20.0941	2.16707	0.721549	3.00336	0.00267015	0.00816889	0.424419	0.0750573	0.490342	0.0101827	UP_TGF
ARHGAP15	1	36.1943	-2.24725	0.748398	-3.00274	0.00267558	0.00818289	0.00373025	0.0181554	0.972284	0.00582993	UP_BMP
AURKAIP1	1	969.262	-0.711632	0.237054	-3.00199	0.00268225	0.00820175	0.016711	0.00456782	0.56871	0.410011	UP_BMP
ATXN10	1	2158.34	-0.468597	0.156434	-2.99549	0.00274005	0.0083628	0.219785	0.000108202	0.632801	0.147306	UP_BMP
FABP4	1	31.4074	-1.49364	0.499685	-2.98917	0.0027974	0.00851552	0.0771042	0.14851	0.518423	0.255964	UP_BMP
F2RL2	1	355.368	0.827166	0.277077	2.98533	0.00283271	0.00861656	0.104874	0.0334974	0.386878	0.474751	UP_TGF
KIAA1522	1	636.296	0.792772	0.265766	2.98297	0.00285471	0.00867628	0.0952042	0.0398464	0.753329	0.11162	UP_TGF
ANO10	1	1030.8	-0.431045	0.144913	-2.97451	0.00293459	0.00889325	0.0789973	0.0404228	0.870097	0.0104826	UP_BMP
MSN	1	10792.4	0.574185	0.19369	2.96445	0.00303225	0.00916016	0.304608	0.151396	0.494586	0.0494102	UP_TGF
NAA15	1	957.473	-0.50555	0.170541	-2.96439	0.00303281	0.00916016	0.470353	0.074979	0.433049	0.0216197	UP_BMP
GMFB	1	659.206	-0.494617	0.166989	-2.96198	0.00305672	0.00922217	0.289293	0.0195594	0.490625	0.200523	UP_BMP
RNF135	1	437.82	0.513579	0.173426	2.96137	0.00306274	0.00923354	0.112923	0.164247	0.499187	0.223643	UP_TGF
KAT6B	1	1158.22	0.418284	0.141304	2.96017	0.00307466	0.00926225	0.24841	0.0341547	0.703293	0.0141416	UP_TGF
ATP11B	1	1939.75	-0.626805	0.211977	-2.95695	0.00310703	0.00934115	0.166419	0.161147	0.352876	0.319558	UP_BMP
ATG4B	1	1405	0.51853	0.175418	2.95596	0.00311697	0.00936411	0.279133	0.0279097	0.616756	0.0762015	UP_TGF
RAB7A	1	6761.65	-0.427586	0.14478	-2.95335	0.00314348	0.00943333	0.146119	0.00577793	0.679409	0.168694	UP_BMP
KCND1	1	91.5423	1.14392	0.388381	2.94536	0.00322576	0.00965004	0.173115	0.0125674	0.807039	0.00727868	UP_TGF
RGN	1	154.9	0.880081	0.298947	2.94394	0.00324068	0.00968934	0.123237	0.0809159	0.451952	0.343895	UP_TGF
ZNF192P1	1	53.8479	-1.16537	0.396484	-2.93927	0.0032899	0.00982028	0.0190299	0.195448	0.659996	0.125525	UP_BMP
ARL15	1	209.804	-0.6787	0.231113	-2.93667	0.00331762	0.00989036	0.00506043	0.125429	0.772044	0.0974662	UP_BMP
SOX5	1	2943.03	-0.366212	0.124792	-2.93458	0.00333996	0.00994786	0.0441119	0.0610683	0.392803	0.502017	UP_BMP
SHC2	1	1192.85	0.529811	0.180564	2.9342	0.00334411	0.0099584	0.0675893	0.307953	0.359907	0.264551	UP_TGF
GPR183	1	50.2851	1.76398	0.602553	2.92751	0.00341692	0.0101548	0.162015	0.0919322	0.609425	0.136627	UP_TGF
RMI2	1	57.3715	1.10552	0.377698	2.927	0.00342253	0.0101696	0.370205	0.0106765	0.586871	0.0322481	UP_TGF
NOTCH2	1	20677.5	0.439537	0.150315	2.9241	0.00345451	0.0102497	0.23345	0.00335061	0.409363	0.353837	UP_TGF
JADE1	1	1641.31	-0.568514	0.194779	-2.91876	0.00351427	0.0104119	0.0683318	0.09914	0.584413	0.248116	UP_BMP
AKAP12	1	963.837	-0.791416	0.271407	-2.91597	0.0035458	0.0104938	0.115118	4.29322e-05	0.617806	0.267033	UP_BMP
CBX1	1	2085.94	0.480442	0.164762	2.91598	0.00354577	0.0104938	0.218021	0.200494	0.526217	0.055268	UP_TGF
CYP3A4	1	21.4495	-2.15073	0.737944	-2.91448	0.00356276	0.0105383	0.292495	0.0715129	0.57246	0.0635323	UP_BMP
BAD	1	595.432	0.503683	0.173249	2.90728	0.00364589	0.0107549	0.292579	0.176358	0.519964	0.0110982	UP_TGF
EMG1	1	509.294	-0.568033	0.195727	-2.90217	0.00370593	0.0109083	0.170238	0.0181298	0.808045	0.00358701	UP_BMP
TMED7	1	2524.72	-0.402065	0.138686	-2.8991	0.00374237	0.0110056	0.0338012	1.57083e-05	0.877306	0.0888769	UP_BMP
DUSP16	1	327.952	-0.634248	0.218826	-2.89842	0.0037505	0.0110216	0.0238741	0.0652141	0.874558	0.0363535	UP_BMP
PXDC1	1	1723.26	0.46514	0.16065	2.89536	0.00378727	0.0111176	0.0112998	0.382097	0.59655	0.0100528	UP_TGF
SOCS4	1	498.477	-0.611561	0.211325	-2.89393	0.00380447	0.011158	0.0268555	0.118206	0.773086	0.0818527	UP_BMP
OPRL1	1	214.853	0.796175	0.275849	2.88627	0.00389833	0.0114025	0.00862925	0.161094	0.816487	0.0137896	UP_TGF
FAM157B	1	453.23	0.781929	0.271155	2.8837	0.00393039	0.011486	0.0217827	0.174535	0.798977	0.00470604	UP_TGF
PRDX3	1	1917.08	-0.410576	0.14312	-2.86876	0.0041208	0.0119759	0.0780168	0.0261078	0.865731	0.0301445	UP_BMP
LRRFIP1	1	2564.28	0.511159	0.178693	2.86054	0.00422919	0.0122559	0.00155591	0.2327	0.707046	0.058698	UP_TGF
FANCB	1	23.8325	-1.6122	0.564781	-2.85457	0.00430958	0.0124557	0.399117	0.128984	0.420734	0.0511657	UP_BMP
HMG20B	1	1941.32	-0.438959	0.153872	-2.85275	0.00433431	0.0125205	0.2782	0.0232062	0.666879	0.0317151	UP_BMP
SRP14	1	3202.43	-0.546792	0.191739	-2.85176	0.00434783	0.0125551	0.0397628	1.07169e-05	0.830443	0.129783	UP_BMP
N4BP1	1	2475.1	-0.506526	0.177682	-2.85074	0.00436178	0.0125909	0.152437	0.0389095	0.651086	0.157568	UP_BMP
SSTR5	1	101.465	1.25361	0.440118	2.84834	0.00439477	0.0126817	0.232185	0.0831544	0.636148	0.0485129	UP_TGF
NAMPT	1	1348.39	-0.638729	0.224354	-2.84697	0.00441374	0.0127296	0.303698	0.169729	0.523963	0.00260962	UP_BMP
DNAJA3	1	1400.24	-0.376273	0.13235	-2.84302	0.00446881	0.0128725	0.2281	0.106041	0.525829	0.14003	UP_BMP
PPT2	1	413.258	0.854421	0.301826	2.83084	0.00464254	0.0133141	0.110582	0.171394	0.609711	0.108313	UP_TGF
PLIN3	1	2881.04	-0.597348	0.211067	-2.83014	0.00465278	0.0133341	0.256609	0.0019789	0.720242	0.0211702	UP_BMP
MRPL35	1	528.703	-0.583149	0.206088	-2.82961	0.00466041	0.0133513	0.000568176	3.30118e-05	0.62547	0.373929	UP_BMP
NMU	1	21.5538	-2.76153	0.975961	-2.82955	0.00466131	0.0133515	0.438639	0.0253928	0.486208	0.0497602	UP_BMP
AP3S1	1	2344.14	-0.372113	0.131619	-2.8272	0.00469569	0.0134382	0.0264334	0.346268	0.571818	0.0554807	UP_BMP
HARBI1	1	154.147	-0.72039	0.25489	-2.82628	0.00470919	0.0134744	0.28644	0.182528	0.482107	0.048924	UP_BMP
CEP295NL	1	30.1863	1.34051	0.475771	2.81754	0.00483925	0.0137981	0.168094	0.0168153	0.720523	0.0945674	UP_TGF
PIGZ	1	118.457	0.848971	0.301514	2.81569	0.00486729	0.0138611	0.221938	0.226627	0.276018	0.275418	UP_TGF
PAICS	1	3293.03	-0.493924	0.175552	-2.81355	0.00489983	0.0139391	0.00508793	0.000794805	0.981213	0.0129042	UP_BMP
MESD	1	1737.96	-0.446093	0.15866	-2.81164	0.00492902	0.01401	0.270562	0.019399	0.600048	0.109991	UP_BMP
ZNF593	1	271.78	-0.757968	0.26976	-2.80979	0.00495743	0.014076	0.451569	0.0361656	0.420765	0.0915004	UP_BMP
ZNF648	1	59.2756	-1.16889	0.416004	-2.8098	0.00495717	0.014076	0.0356142	1.75604e-05	0.812996	0.151372	UP_BMP
BCAP29	1	950.208	-0.536545	0.190966	-2.80964	0.00495963	0.0140798	0.00081648	0.00517882	0.853012	0.140993	UP_BMP
CRY1	1	709.766	0.456291	0.16243	2.80915	0.00496726	0.014099	0.14584	0.273708	0.404663	0.175789	UP_TGF
COMMD9	1	542.31	-0.543629	0.193572	-2.8084	0.00497878	0.0141292	1.30215e-05	0.0475907	0.874005	0.0783915	UP_BMP
ZXDC	1	1000.68	0.419575	0.149533	2.8059	0.00501767	0.0142247	0.147158	0.22157	0.484514	0.146759	UP_TGF
IRAK1	1	2982.35	0.453876	0.16179	2.80534	0.00502641	0.014247	0.442243	0.0032684	0.488806	0.0656821	UP_TGF
GALM	1	394.81	0.58053	0.20715	2.80247	0.00507135	0.0143644	0.0117726	0.0695	0.859324	0.0594029	UP_TGF
IFFO1	1	828.323	0.549975	0.196439	2.79972	0.00511465	0.0144669	0.0173696	0.138377	0.819838	0.0244159	UP_TGF
ADGRF2	1	11.4857	2.58409	0.923452	2.7983	0.0051373	0.0145285	0.0796149	0.0304478	0.812265	0.077672	UP_TGF
GADD45B	1	1475.51	0.564251	0.202013	2.79313	0.00522002	0.0147394	0.135651	0.179197	0.636048	0.0491041	UP_TGF
PKD2	1	2827.47	-0.593891	0.213146	-2.78631	0.00533114	0.0150141	0.00594623	0.306605	0.614368	0.0730814	UP_BMP
MRPL17	1	1112.01	-0.495755	0.178051	-2.78435	0.00536349	0.015087	0.173559	0.25948	0.418414	0.148547	UP_BMP
NUCB1	1	6740.53	0.418706	0.150433	2.78335	0.00538013	0.015126	0.323459	0.0984967	0.445245	0.1328	UP_TGF
SEMA4A	1	179.864	0.979042	0.351743	2.7834	0.00537924	0.015126	0.278328	0.0721797	0.595178	0.0543144	UP_TGF
FLNA	1	21441	0.575718	0.206892	2.7827	0.00539094	0.0151538	0.00116927	0.0355599	0.448304	0.514966	UP_TGF
ANGPTL5	1	1898.77	-0.876682	0.315087	-2.78235	0.00539665	0.0151672	0.102683	0.290444	0.551129	0.0557442	UP_BMP
LRRC45	1	195.575	0.658805	0.236887	2.78109	0.00541767	0.0152184	0.111464	0.0440378	0.534881	0.309617	UP_TGF
PIK3C2B	1	530.368	0.864009	0.310963	2.7785	0.0054611	0.0153312	0.159406	0.214599	0.542232	0.0837628	UP_TGF
SCARF1	1	137.968	1.00582	0.362196	2.77701	0.00548615	0.0153816	0.0622107	0.115172	0.73615	0.0864668	UP_TGF
SULT1A3	1	133.774	0.796068	0.286785	2.77584	0.00550596	0.0154265	0.24887	0.0114679	0.738834	0.000828722	UP_TGF
SORBS1	1	2979.45	-0.64635	0.233019	-2.77381	0.00554047	0.0155152	0.0121349	0.142913	0.477969	0.366983	UP_BMP
MPV17L2	1	248.855	-0.818546	0.295205	-2.77281	0.00555746	0.0155494	0.227777	0.0382479	0.439827	0.294148	UP_BMP
C1QTNF1	1	1891.9	0.78655	0.284052	2.76903	0.00562232	0.0157066	0.0545545	0.0548216	0.461028	0.429596	UP_TGF
ABCF1	1	686.076	0.620309	0.224079	2.76826	0.00563571	0.0157387	0.00329417	0.0968807	0.464672	0.435154	UP_TGF
VPS18	1	652.741	-0.562835	0.203334	-2.76804	0.00563952	0.0157439	0.426049	0.0154931	0.455138	0.10332	UP_BMP
ME1	1	2382.87	-0.517852	0.187229	-2.76588	0.00567698	0.0158349	0.0890193	0.113486	0.485107	0.312388	UP_BMP
GOLGA8H	1	28.6733	1.30991	0.474819	2.75875	0.00580232	0.0161541	0.172128	0.0530868	0.59179	0.182995	UP_TGF
METRN	1	390.245	-0.563668	0.204437	-2.75717	0.00583045	0.0162104	0.37264	0.0480515	0.480889	0.0984192	UP_BMP
TMED7-TICAM2	1	226.302	-0.716827	0.260225	-2.75464	0.00587561	0.0163191	0.0508933	0.0299476	0.745992	0.173167	UP_BMP
MRPS17	1	335.994	-0.504885	0.183341	-2.7538	0.00589077	0.0163557	0.0130806	0.289211	0.601694	0.0960148	UP_BMP
RBBP5	1	872.01	-0.513001	0.186313	-2.75344	0.00589728	0.0163654	0.0521774	0.040081	0.894786	0.0129553	UP_BMP
RPS8	1	25378.8	0.365988	0.133026	2.75124	0.005937	0.0164616	0.0557497	0.212309	0.510061	0.22188	UP_TGF
RPP25	1	134.536	0.884759	0.322114	2.74673	0.0060193	0.0166614	0.00173461	0.390733	0.579485	0.0280475	UP_TGF
KLHL36	1	1300.8	0.466047	0.169768	2.7452	0.00604731	0.0167333	0.221237	0.165649	0.545359	0.0677548	UP_TGF
ABCF2	1	1628.34	-0.678778	0.2474	-2.74364	0.00607613	0.0167988	0.0451309	0.32035	0.406099	0.22842	UP_BMP
SIPA1	1	368.878	0.668463	0.243714	2.74281	0.00609151	0.016827	0.404704	0.0157194	0.576605	0.00297135	UP_TGF
DSN1	1	216.671	0.580601	0.211842	2.74072	0.00613046	0.0169289	0.0461377	0.0430511	0.901778	0.00903304	UP_TGF
INVS	1	630.866	-0.406306	0.148862	-2.72942	0.00634456	0.017458	0.313712	0.105302	0.415533	0.165454	UP_BMP
B3GAT1	1	17.579	-1.74519	0.640122	-2.72635	0.00640398	0.0176096	0.00494239	0.0224579	0.530926	0.441674	UP_BMP
TJP2	1	2544.3	-0.415196	0.152303	-2.72613	0.00640822	0.0176153	0.203195	0.175831	0.614211	0.00676284	UP_BMP
NR1D1	1	1177.73	0.944533	0.346702	2.72434	0.00644311	0.0176993	0.00880179	0.0578736	0.933161	0.000163133	UP_TGF
ATXN2L	1	4057.64	0.440423	0.162218	2.715	0.0066275	0.0181446	0.0728261	0.101288	0.714392	0.111494	UP_TGF
RAD51D	1	242.536	0.559449	0.206188	2.7133	0.00666167	0.018229	0.0016156	0.116154	0.543819	0.338411	UP_TGF
PTDSS2	1	694.969	0.566181	0.208778	2.71188	0.00669022	0.0182887	0.196371	0.177626	0.33216	0.293842	UP_TGF
SEC16B	1	204.216	0.78837	0.290939	2.70974	0.00673355	0.0183856	0.183042	0.27734	0.530465	0.00915329	UP_TGF
C17orf67	1	227.669	-0.974385	0.359806	-2.70808	0.00676732	0.0184747	0.221981	0.0933555	0.553863	0.130801	UP_BMP
ANKFY1	1	1976.6	0.370125	0.136937	2.70289	0.00687393	0.0187366	0.271317	0.0157996	0.520807	0.192077	UP_TGF
TUFM	1	2418.14	-0.485848	0.179754	-2.70285	0.00687475	0.0187366	0.149425	0.119968	0.46336	0.267247	UP_BMP
ARF3	1	3539.53	-0.469349	0.173669	-2.70255	0.00688094	0.0187476	0.0763371	0.0783277	0.832734	0.0126017	UP_BMP
USP18	1	76.6833	0.87316	0.323355	2.70031	0.00692744	0.0188637	0.167611	0.20411	0.413828	0.214451	UP_TGF
ZNF468	1	247.909	-0.62675	0.23263	-2.6942	0.00705588	0.0191693	0.327568	0.0601055	0.601585	0.0107415	UP_BMP
NDUFV2	1	1459.51	-0.348423	0.129458	-2.6914	0.00711523	0.019308	0.0487904	0.0525119	0.54049	0.358208	UP_BMP
GTF3C1	1	3369.46	0.437986	0.163066	2.68595	0.00723232	0.0195701	0.110178	0.223064	0.643662	0.0230966	UP_TGF
CHD1	1	1012.92	0.38466	0.143331	2.68373	0.00728065	0.0196881	0.0593625	0.248639	0.490419	0.20158	UP_TGF
GRIPAP1	1	1017.37	0.448296	0.167529	2.67593	0.00745215	0.0201051	0.00698813	0.0850653	0.521343	0.386603	UP_TGF
SERPINB9	1	133.008	-0.708492	0.264961	-2.67395	0.00749639	0.0202078	0.248245	0.182648	0.463325	0.105782	UP_BMP
RELA	1	1804.64	0.415765	0.155636	2.6714	0.00755363	0.0203352	0.0258942	0.0390383	0.820159	0.114908	UP_TGF
ZMYM3	1	1791.68	0.604056	0.22614	2.67116	0.00755888	0.0203426	0.0494169	0.00681051	0.9277	0.0160721	UP_TGF
AP3D1	1	5849.85	-0.401798	0.15045	-2.67064	0.00757061	0.0203708	0.359587	0.0052576	0.55234	0.0828152	UP_BMP
PRPSAP1	1	1232.36	-0.567054	0.212411	-2.66961	0.00759384	0.0204265	0.444294	0.0247265	0.491338	0.0396414	UP_BMP
PIGO	1	1088.22	-0.413959	0.155296	-2.66561	0.00768497	0.0206444	0.129705	6.3942e-06	0.655143	0.215146	UP_BMP
KATNA1	1	306.45	0.456018	0.17126	2.66272	0.00775115	0.0207948	0.204073	0.020294	0.510615	0.265018	UP_TGF
BROX	1	868.378	-0.381177	0.143552	-2.65533	0.00792311	0.0212003	0.318205	0.175226	0.43807	0.0684996	UP_BMP
IFT27	1	867.94	-0.394248	0.148473	-2.65536	0.00792242	0.0212003	0.187354	0.051123	0.708911	0.052612	UP_BMP
MAP6	1	443.03	0.769516	0.289939	2.65407	0.00795282	0.0212658	0.0146889	0.0942817	0.449448	0.441581	UP_TGF
RASGRP3	1	480.91	0.597604	0.225358	2.6518	0.00800646	0.0213882	0.0543951	0.0394056	0.894238	0.0119618	UP_TGF
C11orf71	1	219.893	-0.561846	0.211988	-2.65036	0.00804054	0.0214687	2.52113e-05	0.200096	0.648602	0.151277	UP_BMP
MTMR4	1	1218.59	0.328812	0.124129	2.64895	0.00807426	0.021541	0.0814034	0.0276251	0.881382	0.00958956	UP_TGF
RPF1	1	449.742	-0.488366	0.184869	-2.64168	0.00824957	0.0219656	0.447354	0.0188399	0.513929	0.0198767	UP_BMP
GALNT14	1	51.9098	-1.43031	0.542146	-2.63824	0.00833364	0.0221569	0.198735	0.0144158	0.591017	0.195832	UP_BMP
FAM157C	1	2289.82	0.540875	0.206167	2.62348	0.00870362	0.0230391	0.00850216	0.146517	0.810576	0.0344052	UP_TGF
HOMEZ	1	357.432	-0.562755	0.21464	-2.62186	0.00874526	0.0231377	0.151141	0.25924	0.387109	0.20251	UP_BMP
BAIAP2	1	531.755	0.660359	0.252404	2.61628	0.00888947	0.0234359	0.30314	0.0455472	0.504964	0.146348	UP_TGF
SCFD2	1	305.564	-0.745784	0.285221	-2.61476	0.00892903	0.0235211	0.143195	0.201394	0.592673	0.0627383	UP_BMP
SDC2	1	9392.65	0.432911	0.165719	2.61231	0.00899322	0.0236711	0.0120838	0.201624	0.768305	0.0179868	UP_TGF
DDX23	1	2167.14	0.335517	0.128474	2.61155	0.00901338	0.0237165	0.182414	0.0091608	0.63187	0.176555	UP_TGF
SRSF12	1	153.938	0.758478	0.291166	2.60497	0.00918826	0.0241183	0.128884	0.00174938	0.679991	0.189375	UP_TGF
SRL	1	74.0272	1.07832	0.41433	2.60257	0.00925271	0.0242612	0.170005	0.0175128	0.399066	0.413416	UP_TGF
CHMP5	1	1192.09	-0.360626	0.138632	-2.60132	0.00928651	0.0243135	0.054909	0.00561301	0.697872	0.241606	UP_BMP
HS6ST3	1	61.5408	-1.56716	0.602929	-2.59925	0.00934274	0.0244372	0.297276	0.0423999	0.536517	0.123807	UP_BMP
SHANK3	1	288.763	0.598564	0.230335	2.59867	0.0093585	0.0244745	0.0531248	0.0475513	0.630593	0.268731	UP_TGF
XXYLT1	1	1041.57	0.438132	0.168662	2.59768	0.00938549	0.0245293	0.156903	0.0546726	0.517578	0.270846	UP_TGF
DESI2	1	1775.94	0.512476	0.197304	2.5974	0.00939333	0.0245419	0.00335301	0.282052	0.703642	0.0109533	UP_TGF
MFN2	1	1870.81	-0.464383	0.178903	-2.59572	0.00943917	0.0246419	0.0512558	0.294162	0.372442	0.28214	UP_BMP
TOP3B	1	708.306	0.375562	0.144805	2.59358	0.00949834	0.0247805	0.304012	0.0458213	0.560872	0.0892946	UP_TGF
MICAL1	1	932.339	0.803215	0.309942	2.5915	0.00955575	0.0249104	0.247116	0.227802	0.449873	0.0752087	UP_TGF
PDE8A	1	1061.56	-0.532526	0.205994	-2.58516	0.00973344	0.0253191	0.0427567	0.228069	0.523219	0.205956	UP_BMP
WDR60	1	1044.79	0.469457	0.181847	2.58161	0.00983405	0.02555	0.0439378	0.0353885	0.649689	0.270985	UP_TGF
MRPS34	1	828.454	-0.423243	0.163955	-2.58146	0.00983826	0.0255569	0.163604	0.162562	0.643977	0.0298571	UP_BMP
TMEM70	1	353.776	-0.532251	0.206565	-2.57667	0.00997559	0.0258683	0.198807	0.11798	0.574781	0.108432	UP_BMP
CD99	1	10380.6	0.353499	0.137297	2.57471	0.0100323	0.0259947	0.301644	0.178961	0.480911	0.0384834	UP_TGF
C11orf58	1	4084.42	-0.341399	0.133066	-2.56564	0.0102986	0.0266297	0.147914	0.0585416	0.654845	0.1387	UP_BMP
MAB21L2	1	118.136	1.25957	0.491017	2.56522	0.0103109	0.0266488	0.0381694	0.00360292	0.455101	0.503127	UP_TGF
GNG2	1	490.403	-0.617848	0.241221	-2.56133	0.0104271	0.0269107	0.0459047	0.0005033	0.491584	0.462008	UP_BMP
HFM1	1	17.3446	1.96009	0.765397	2.56088	0.0104406	0.0269413	0.201069	0.00735666	0.506934	0.284641	UP_TGF
HIP1	1	108.161	0.682028	0.26641	2.56007	0.010465	0.0269957	0.30836	0.0983604	0.481336	0.111943	UP_TGF
KCNN2	1	34.1601	-1.16892	0.456871	-2.55853	0.0105116	0.0270989	0.252402	0.133717	0.573937	0.0399432	UP_BMP
POTEE	1	43.2366	-1.3789	0.538944	-2.55853	0.0105117	0.0270989	0.1483	0.102474	0.531851	0.217376	UP_BMP
MAP7D3	1	897.939	0.471929	0.184669	2.55554	0.0106023	0.0272936	0.149609	0.079918	0.472294	0.298179	UP_TGF
SPRED3	1	38.8838	1.47178	0.576038	2.55501	0.0106186	0.0273312	0.00597589	0.122267	0.470313	0.401445	UP_TGF
PCBP3	1	173.76	0.97083	0.380454	2.55177	0.0107178	0.0275389	0.117532	0.200406	0.575004	0.107058	UP_TGF
COX15	1	939.398	-0.394645	0.154876	-2.54813	0.0108303	0.0277928	0.147753	0.07413	0.554582	0.223535	UP_BMP
DOCK6	1	726.128	0.533619	0.209746	2.54411	0.0109555	0.0280832	0.26045	7.44577e-06	0.626893	0.112649	UP_TGF
PAPPA2	1	1649.77	-2.057	0.808989	-2.54268	0.0110005	0.0281851	0.454063	0.0300625	0.47572	0.0401545	UP_BMP
DLGAP2	1	24.8255	1.63598	0.643683	2.54159	0.0110349	0.0282554	0.141831	0.0189033	0.783212	0.0560532	UP_TGF
NCS1	1	1530.45	-0.357848	0.140907	-2.5396	0.0110979	0.0283903	0.179559	0.0787002	0.513873	0.227868	UP_BMP
MARC2	1	359.675	0.425999	0.167778	2.53907	0.0111148	0.02842	0.0711307	0.294314	0.406581	0.227974	UP_TGF
SYT1	1	25.2952	-1.47096	0.579971	-2.53627	0.0112042	0.0286037	0.111371	0.263577	0.536189	0.088863	UP_BMP
CD164	1	7997.87	-0.413767	0.163249	-2.53457	0.0112585	0.0287243	0.394453	0.00585017	0.596712	0.00298506	UP_BMP
AGGF1	1	1157.17	-0.374031	0.147592	-2.53422	0.0112699	0.0287443	0.312284	0.112392	0.494371	0.0809521	UP_BMP
ZFAND5	1	4792.86	-0.313469	0.123846	-2.53112	0.0113697	0.0289583	0.0444268	0.0183752	0.521765	0.415433	UP_BMP
HNRNPC	1	9377.02	-0.278896	0.110334	-2.52774	0.0114801	0.0292073	0.272654	0.0427403	0.405577	0.279028	UP_BMP
ANGPTL2	1	7804.22	-0.695679	0.275378	-2.52627	0.0115281	0.0292974	0.23842	0.123762	0.579654	0.0581639	UP_BMP
ODF3L1	1	19.516	-1.57207	0.622511	-2.52537	0.0115577	0.0293589	0.139743	0.0763802	0.65293	0.130947	UP_BMP
C20orf27	1	312.815	-0.626537	0.248695	-2.5193	0.0117588	0.0298034	0.202511	0.107074	0.46562	0.224794	UP_BMP
FBXW11	1	2378.65	-0.34754	0.138014	-2.51816	0.0117971	0.0298833	0.100101	0.17795	0.563183	0.158766	UP_BMP
OCEL1	1	121.599	0.722554	0.286977	2.51781	0.0118088	0.0299036	0.0506482	0.308489	0.547337	0.0935258	UP_TGF
TMEM92	1	19.1261	2.09338	0.831617	2.51725	0.0118276	0.0299381	0.404987	0.107622	0.441071	0.0463205	UP_TGF
HAVCR2	1	103.032	0.701116	0.278609	2.51649	0.011853	0.029983	0.0996026	0.123887	0.772979	0.0035308	UP_TGF
BUD23	1	1217	-0.465863	0.185328	-2.51373	0.0119462	0.0302061	0.177128	0.0059906	0.553366	0.263516	UP_BMP
HDAC8	1	457.952	-0.492509	0.196618	-2.5049	0.0122485	0.0308637	0.133462	0.151007	0.434006	0.281525	UP_BMP
CPNE3	1	2364.86	-0.388149	0.15511	-2.5024	0.0123354	0.0310537	0.211491	0.206894	0.564244	0.0173712	UP_BMP
GNA14	1	32.5635	1.43851	0.574849	2.50241	0.0123351	0.0310537	0.177895	0.149042	0.532962	0.1401	UP_TGF
EIF3B	1	4395.73	-0.397171	0.158922	-2.49917	0.0124486	0.0312904	0.207389	0.0199133	0.764678	0.00802005	UP_BMP
BHLHB9	1	206.59	0.899359	0.36035	2.49579	0.0125676	0.0315701	0.358286	0.0687756	0.542131	0.0308078	UP_TGF
CLEC2D	1	120.897	0.907348	0.363606	2.49541	0.0125811	0.031599	0.24199	0.0117929	0.725679	0.0205386	UP_TGF
SLC4A3	1	626.801	-0.564292	0.226197	-2.49469	0.0126066	0.0316534	0.0893592	0.0205459	0.47922	0.410875	UP_BMP
TRPV3	1	198.732	-0.711814	0.285438	-2.49376	0.0126396	0.0317266	0.0470888	0.222642	0.715467	0.014802	UP_BMP
DDX25	1	31.0671	1.22597	0.494453	2.47944	0.0131589	0.0328679	0.220943	0.163805	0.392095	0.223157	UP_TGF
POLR2C	1	1841.42	-0.373725	0.15086	-2.47729	0.0132383	0.0330562	0.0372236	0.100015	0.861853	0.000908839	UP_BMP
SCAMP3	1	1384.68	-0.452167	0.182537	-2.47712	0.0132446	0.0330669	0.330955	0.0235754	0.591468	0.054002	UP_BMP
ARIH2OS	1	106.375	0.691982	0.279516	2.47564	0.0132996	0.0331889	0.246839	0.0465711	0.605205	0.101385	UP_TGF
BOLA3	1	247.743	-0.641987	0.259464	-2.47429	0.0133503	0.0332951	0.000374596	0.139216	0.730316	0.130093	UP_BMP
C9orf85	1	460.167	-0.543678	0.219779	-2.47375	0.0133702	0.0333395	0.0328774	0.0235847	0.466193	0.477345	UP_BMP
TCEAL9	1	1530.02	0.402445	0.163017	2.46873	0.0135594	0.0337546	0.161716	0.279542	0.322831	0.23591	UP_TGF
PROSER3	1	427.314	0.446955	0.181102	2.46797	0.0135881	0.0338106	0.113562	0.00769058	0.694079	0.184669	UP_TGF
TTC7A	1	754.236	0.504882	0.204856	2.46457	0.0137178	0.0340864	0.232879	0.252384	0.44817	0.0665675	UP_TGF
YIPF5	1	3052.21	-0.341797	0.138887	-2.46098	0.0138559	0.0343773	0.101066	0.225023	0.633205	0.0407059	UP_BMP
NAIF1	1	430.978	-0.64828	0.263564	-2.45967	0.0139064	0.0344867	0.278547	0.126562	0.426233	0.168659	UP_BMP
CHRFAM7A	1	38.1058	1.2679	0.516058	2.45689	0.0140144	0.0347176	0.00111754	0.00587256	0.967198	0.0258122	UP_TGF
MED15	1	1760.16	0.397725	0.161891	2.45674	0.0140205	0.0347273	0.204789	0.00760894	0.536974	0.250627	UP_TGF
SYPL2	1	55.4696	-1.45682	0.59308	-2.45636	0.0140353	0.0347588	0.0142694	0.132698	0.646377	0.206656	UP_BMP
EGFL8	1	84.5395	2.82834	1.15325	2.4525	0.0141867	0.0350909	0.115409	0.119444	0.750769	0.0143786	UP_TGF
PSMA7	1	2484.98	-0.409653	0.167185	-2.4503	0.0142738	0.0352797	0.0720185	0.177202	0.499879	0.250901	UP_BMP
S100B	1	1517.36	1.39592	0.570526	2.44673	0.0144159	0.0355823	0.012833	0.112027	0.505897	0.369243	UP_TGF
GEMIN7	1	204.504	-0.551298	0.226325	-2.43587	0.0148561	0.0365251	0.268624	0.0540507	0.36534	0.311985	UP_BMP
UAP1L1	1	1389.7	0.493721	0.202799	2.43454	0.0149109	0.0366452	0.219137	0.118105	0.610581	0.0521775	UP_TGF
RIDA	1	203.613	-0.575809	0.23679	-2.43172	0.0150272	0.0368846	0.119904	0.0554186	0.335223	0.489454	UP_BMP
AZIN2	1	243.17	0.839425	0.345554	2.42921	0.0151317	0.0370853	0.422244	0.000405503	0.498604	0.078747	UP_TGF
LAD1	1	22.8192	-1.67109	0.68814	-2.42841	0.0151652	0.0371616	0.125146	0.251488	0.560962	0.062404	UP_BMP
BDH1	1	369.338	-0.468134	0.193075	-2.42462	0.0153246	0.0375129	0.260497	0.0291864	0.640006	0.0703113	UP_BMP
BMI1	1	1155.67	-0.405172	0.167272	-2.42224	0.015425	0.0377247	0.0453923	0.0599606	0.864888	0.0297595	UP_BMP
MROH8	1	109.041	0.751037	0.310122	2.42175	0.0154461	0.0377705	0.285328	0.0301041	0.625667	0.0589013	UP_TGF
LRRC28	1	600.774	0.391474	0.161684	2.42122	0.0154684	0.0378193	0.289906	0.000208477	0.402823	0.307062	UP_TGF
ADPRM	1	235.23	-0.511988	0.211524	-2.42048	0.0155002	0.0378915	0.325323	0.00157242	0.354438	0.318666	UP_BMP
SHISA9	1	668.067	-0.711631	0.294402	-2.41721	0.0156402	0.0381935	0.231421	0.0167547	0.73427	0.0175544	UP_BMP
IK	1	1779.05	0.327154	0.135581	2.41297	0.015823	0.0385937	0.134357	0.120395	0.590112	0.155137	UP_TGF
C19orf53	1	1017.58	-0.452997	0.188335	-2.40527	0.0161604	0.0393285	0.0487512	0.0741989	0.867045	0.0100052	UP_BMP
ZNF343	1	491.974	0.444059	0.184709	2.40411	0.016212	0.0394422	0.00491801	0.141098	0.774758	0.0792255	UP_TGF
TMEM242	1	334.976	-0.47281	0.196805	-2.40243	0.0162865	0.0396115	0.0639055	0.316043	0.395106	0.224945	UP_BMP
TSN	1	2106.75	-0.457676	0.190623	-2.40094	0.0163528	0.0397551	0.378824	0.0215037	0.548089	0.0515826	UP_BMP
ANKRD36B	1	745.28	-0.543572	0.226423	-2.40069	0.016364	0.0397644	0.133061	0.264299	0.601869	0.000771168	UP_BMP
DHRS12	1	141.118	0.594308	0.247707	2.39924	0.0164291	0.0398869	0.365459	0.117411	0.430913	0.0862175	UP_TGF
MOB1B	1	705.452	-0.493484	0.20588	-2.39695	0.0165324	0.04009	0.140963	0.0868264	0.530824	0.241386	UP_BMP
SNAP47	1	781.397	-0.37279	0.155715	-2.39404	0.0166638	0.0403485	0.0210336	0.259952	0.538645	0.18037	UP_BMP
SH2B3	1	504.329	0.418244	0.174788	2.39286	0.0167175	0.0404726	0.090152	0.149608	0.65785	0.10239	UP_TGF
IQGAP1	1	11134.7	-0.336468	0.140677	-2.39177	0.0167672	0.040575	0.368463	0.110329	0.492089	0.0291191	UP_BMP
MIPEP	1	253.433	-0.612029	0.256207	-2.38881	0.0169031	0.0408796	0.0321781	0.0394662	0.507965	0.420391	UP_BMP
CLEC3A	1	1378.29	1.41165	0.591276	2.38746	0.0169652	0.0409994	0.0876922	0.00972266	0.555104	0.347481	UP_TGF
GID4	1	786.57	0.432047	0.181166	2.38481	0.0170878	0.0412649	0.0059583	0.268559	0.691434	0.0340493	UP_TGF
CERS4	1	734.556	0.431934	0.181184	2.38396	0.0171275	0.0413375	0.110834	0.00431821	0.410988	0.47386	UP_TGF
HDAC5	1	2983.25	-0.385468	0.161724	-2.3835	0.017149	0.0413811	0.0932702	0.310055	0.37841	0.218265	UP_BMP
MON1B	1	1139.4	-0.434773	0.182413	-2.38345	0.0171511	0.0413811	0.0869439	0.06455	0.771598	0.0769084	UP_BMP
TDRD6	1	49.137	1.33856	0.562463	2.37982	0.0173211	0.0417418	0.377086	0.000117426	0.498118	0.124678	UP_TGF
DNAJC3	1	905.425	-0.346401	0.146284	-2.36801	0.0178841	0.0429335	0.41899	0.102258	0.430579	0.0481724	UP_BMP
GORASP2	1	3696.69	-0.34199	0.14488	-2.3605	0.0182504	0.0436712	0.042456	0.0890592	0.41645	0.452035	UP_BMP
XIRP1	1	70.2788	1.26479	0.536197	2.35882	0.0183333	0.0438439	0.0279005	0.0352865	0.526505	0.410308	UP_TGF
DEGS2	1	44.7697	-0.954859	0.405492	-2.35482	0.0185319	0.0442214	0.0259785	0.257838	0.593697	0.122486	UP_BMP
LYPD5	1	8.20122	2.19482	0.932404	2.35393	0.018576	0.0442851	0.0120116	0.0602718	0.817738	0.109979	UP_TGF
CALML6	1	30.9994	1.13255	0.48124	2.35341	0.0186022	0.0443373	0.196699	0.077324	0.450678	0.275298	UP_TGF
TDG	1	840.446	-0.387588	0.165143	-2.34698	0.0189261	0.0449646	0.00686089	0.158884	0.513735	0.320521	UP_BMP
B3GNT7	1	1404.26	-0.550209	0.234561	-2.34569	0.0189917	0.0451008	0.0285389	0.319466	0.496063	0.155933	UP_BMP
SYAP1	1	3084.67	-0.268173	0.114343	-2.34533	0.01901	0.0451377	0.0730409	0.0089244	0.549871	0.368164	UP_BMP
ZNF672	1	511.275	0.399598	0.17042	2.34479	0.019038	0.0451844	0.175061	0.124769	0.697719	0.00245114	UP_TGF
SKIDA1	1	114.765	0.719497	0.306994	2.34368	0.0190944	0.0453117	0.0701703	0.000901701	0.592565	0.336363	UP_TGF
C16orf95	1	135.156	0.72188	0.308422	2.34056	0.019255	0.0456721	0.227928	0.0331151	0.720934	0.0180223	UP_TGF
FOSB	1	85.4434	-0.89636	0.383462	-2.33755	0.0194108	0.0459889	0.369028	0.0657013	0.551988	0.0132825	UP_BMP
DNAJC21	1	1724.06	-0.327464	0.140486	-2.33094	0.0197565	0.046706	0.136101	0.00264469	0.790396	0.0708576	UP_BMP
SLC25A25	1	390.571	-0.462883	0.198729	-2.32922	0.0198474	0.046887	0.189688	0.212274	0.515105	0.0829332	UP_BMP
ACTN4	1	8972.43	-0.476736	0.204689	-2.32908	0.0198548	0.0468977	0.164131	0.134067	0.56234	0.139461	UP_BMP
WASHC5	1	1220.08	-0.575378	0.247393	-2.32576	0.0200312	0.0472253	0.123246	0.00086016	0.548868	0.327025	UP_BMP
TWISTNB	1	405.469	-0.451373	0.194252	-2.32365	0.0201442	0.0474506	0.163702	0.00426646	0.601197	0.230835	UP_BMP
ATP13A1	1	2004.79	-0.361453	0.155635	-2.32244	0.0202092	0.0475761	0.284804	0.0129195	0.638606	0.0636701	UP_BMP
SGTA	1	1548.25	-0.39929	0.171923	-2.3225	0.0202061	0.0475761	0.22733	0.0328584	0.599336	0.140476	UP_BMP
UACA	1	3234.84	0.377662	0.162613	2.32246	0.0202083	0.0475761	0.370601	0.0133572	0.555665	0.060377	UP_TGF
COL20A1	1	16.8111	-1.75905	0.758197	-2.32004	0.0203386	0.0478462	0.228562	0.240433	0.450355	0.0806503	UP_BMP
DDX11L2	1	103.382	0.664243	0.286837	2.31575	0.0205719	0.0483393	0.154217	0.120836	0.673204	0.0517428	UP_TGF
IL13RA1	1	5016.58	-0.380077	0.164172	-2.31512	0.0206065	0.0484136	0.241192	0.00590994	0.615382	0.137517	UP_BMP
NAE1	1	701.054	0.441965	0.191507	2.30782	0.0210089	0.0492454	0.00695331	0.0991975	0.746582	0.147267	UP_TGF
MUC20	1	801.645	0.468774	0.203233	2.30659	0.0210778	0.0493879	0.124764	0.232402	0.558122	0.084712	UP_TGF
LPXN	1	191.436	0.518172	0.224914	2.30387	0.02123	0.0497065	0.198527	0.0352673	0.721043	0.0451627	UP_TGF
THADA	1	1064.6	0.47862	0.207853	2.30269	0.0212965	0.0498407	0.200135	0.0270853	0.703736	0.0690434	UP_TGF
ANKRD10	1	1316	0.582822	0.253191	2.3019	0.0213407	0.0499225	0.00500905	0.0916024	0.545884	0.357504	UP_TGF

## Sheet: supplementary file 4c
gene	clust	baseMean	log2FoldChange	lfcSE	stat	pvalue	padj	ENH_variance	PROM_variance	Unexplained_variance	Combo.Int.variance	DIR
FAP	2	3312.29	7.01565	0.181658	38.62	0	0	0.00173893	0.0697452	0.0415649	0.886951	UP_TGF
MGST1	2	10355.3	-6.83518	0.184967	-36.9536	6.38654e-299	3.46959e-295	0.0373116	0.053676	0.00328875	0.905724	UP_BMP
LGI4	2	5264.12	-6.88505	0.189883	-36.2594	7.05897e-288	2.87618e-284	0.230834	0.113486	0.00715528	0.648525	UP_BMP
IRF6	2	3813.68	-8.83266	0.25015	-35.3095	4.20343e-273	1.37015e-269	0.0502644	0.265141	0.0129191	0.671675	UP_BMP
PRG4	2	30123.3	6.4379	0.183004	35.179	4.18519e-271	1.13684e-267	0.30131	0.00973733	0.0131207	0.675832	UP_TGF
SLC38A4	2	31953.2	-4.86825	0.143953	-33.8185	1.05551e-250	2.45753e-247	0.188194	0.0456526	0.0864281	0.679726	UP_BMP
LPAR3	2	5180.2	-8.40698	0.256081	-32.8293	2.24813e-236	4.58e-233	0.0332076	0.175492	0.00380082	0.7875	UP_BMP
CMKLR1	2	2197.95	4.61544	0.149089	30.9575	2.01167e-210	3.27862e-207	0.0842022	0.0443404	0.0334743	0.837983	UP_TGF
IL17B	2	2899.9	-8.79155	0.298466	-29.4558	1.06088e-190	1.57183e-187	0.00829024	0.194851	0.0589708	0.737888	UP_BMP
SERTAD4	2	2779.76	6.47634	0.226149	28.6375	2.29095e-180	3.1115e-177	0.123735	0.0590723	0.0394331	0.77776	UP_TGF
PENK	2	99134.6	5.0691	0.177712	28.5243	5.85506e-179	7.34044e-176	0.0674525	0.0625491	0.0918344	0.778164	UP_TGF
COL3A1	2	388593	3.5436	0.132161	26.8127	2.29523e-158	2.49384e-155	0.193946	0.00170389	0.00127907	0.803071	UP_TGF
FGFBP2	2	9433.18	-4.67339	0.1745	-26.7816	5.29323e-158	5.39182e-155	0.224158	0.247105	0.0828515	0.445885	UP_BMP
HTRA1	2	24649.8	3.43596	0.131078	26.213	1.88965e-151	1.71098e-148	0.0802965	0.399224	0.328332	0.192148	UP_TGF
CHST6	2	2513.96	3.64447	0.139352	26.1529	9.14183e-151	7.84177e-148	0.0871661	0.00141871	0.100684	0.810731	UP_TGF
SESN1	2	12979.6	-4.88467	0.19225	-25.4079	2.06475e-142	1.60245e-139	0.355033	0.0147372	0.0315422	0.598688	UP_BMP
AEBP1	2	24921.8	4.59249	0.183158	25.0739	9.58154e-139	6.50666e-136	0.0419391	0.0266284	0.0883968	0.843036	UP_TGF
DEPTOR	2	1610.29	-6.02775	0.246888	-24.4149	1.18698e-131	7.16496e-129	0.294651	0.0568746	0.0062857	0.642189	UP_BMP
SLC29A1	2	4596.4	3.20856	0.13232	24.2486	6.84344e-130	3.84601e-127	0.0739233	0.190137	0.130101	0.605839	UP_TGF
CILP2	2	30826.3	5.86492	0.243785	24.0578	6.91722e-128	3.7579e-125	0.036294	0.0847615	0.0256015	0.853343	UP_TGF
GALNT16	2	1290.99	7.34364	0.314048	23.3838	6.24164e-121	2.67701e-118	0.0523611	0.107002	0.000290697	0.840346	UP_TGF
PANK3	2	8358.51	-3.22369	0.140339	-22.9708	9.13045e-117	3.7202e-114	0.205492	0.0103739	0.039445	0.744689	UP_BMP
CHI3L1	2	4367.74	8.65475	0.377272	22.9403	1.83975e-116	7.31324e-114	0.0206132	0.463267	0.0299078	0.486212	UP_TGF
SCUBE1	2	3115.47	-3.96235	0.173837	-22.7934	5.32823e-115	1.97362e-112	0.0426434	0.00659949	0.018311	0.932446	UP_BMP
SLC13A5	2	6008.49	-6.39598	0.285579	-22.3965	4.25469e-111	1.54095e-108	0.0414593	0.0134586	0.00609074	0.938991	UP_BMP
PCOLCE	2	7725.9	3.02356	0.1369	22.0859	4.32021e-108	1.53067e-105	0.174627	0.075949	0.0338893	0.715534	UP_TGF
LRIG1	2	2466.21	3.30819	0.149884	22.0717	5.9066e-108	2.04821e-105	0.123287	0.187969	0.0228109	0.665932	UP_TGF
ST6GAL2	2	1101.54	3.17317	0.144465	21.965	6.22632e-107	2.02953e-104	0.0272384	0.0260632	0.055136	0.891562	UP_TGF
FBLN1	2	6278.12	3.23317	0.151142	21.3916	1.60016e-101	4.82952e-99	0.101358	0.0149742	0.224414	0.659254	UP_TGF
COL15A1	2	4474.61	7.34411	0.344563	21.3143	8.36675e-101	2.4793e-98	0.0251946	0.0717254	0.0136476	0.889432	UP_TGF
TNMD	2	5276	6.42473	0.302704	21.2245	5.67788e-100	1.62347e-97	0.100902	0.275582	0.0149531	0.608563	UP_TGF
SMPD3	2	1277.87	-3.99071	0.188203	-21.2043	8.70899e-100	2.44723e-97	0.324816	0.0469754	0.00308008	0.625129	UP_BMP
ST3GAL5	2	1365.81	-3.26221	0.154206	-21.1549	2.48584e-99	6.86681e-97	0.12324	0.0213135	0.352545	0.502902	UP_BMP
SELENOP	2	1262.85	-3.5911	0.173759	-20.6672	6.8377e-95	1.79743e-92	0.00997267	0.247265	0.00617359	0.736589	UP_BMP
P3H2	2	10126.6	-3.27275	0.158984	-20.5854	3.71135e-94	9.45118e-92	0.199003	0.0725415	0.0236183	0.704838	UP_BMP
FBLN7	2	920.632	3.36113	0.163941	20.502	2.06431e-93	5.17602e-91	0.150864	0.38622	0.0600372	0.402879	UP_TGF
THY1	2	2055.23	3.74792	0.183081	20.4714	3.87712e-93	9.57414e-91	0.159386	0.0702065	0.0282624	0.742145	UP_TGF
RCL1	2	3412.96	-4.87072	0.23798	-20.4669	4.24838e-93	1.03343e-90	0.181155	0.274089	0.262862	0.281895	UP_BMP
SAMHD1	2	5201.56	-4.79457	0.235342	-20.3728	2.91564e-92	6.9881e-90	0.34197	0.0057975	0.00014871	0.652084	UP_BMP
CRYZ	2	1845.25	-2.97687	0.1478	-20.1412	3.21586e-90	7.59596e-88	0.271322	0.00563164	0.0177442	0.705303	UP_BMP
TSPAN2	2	747.226	4.51184	0.224818	20.0688	1.38173e-89	3.21707e-87	0.152835	0.0933624	0.0216287	0.732174	UP_TGF
FMO5	2	1665.31	-5.10717	0.255985	-19.951	1.46787e-88	3.36948e-86	0.0216367	0.436801	0.331891	0.209671	UP_BMP
COMP	2	68882.6	6.38868	0.320954	19.9053	3.66249e-88	8.1769e-86	0.0653593	0.00638033	0.00855458	0.919706	UP_TGF
GALNT10	2	5492.24	2.77131	0.1407	19.6966	2.3077e-86	5.01479e-84	0.0729805	0.252539	0.00510457	0.669376	UP_TGF
ADAMTSL2	2	2187.66	5.66802	0.289231	19.5968	1.64531e-85	3.52831e-83	0.108227	0.00486038	0.242949	0.643964	UP_TGF
DNM3	2	366.949	4.67756	0.239267	19.5496	4.15977e-85	8.58177e-83	0.0935462	0.0966856	0.0196175	0.790151	UP_TGF
FGD4	2	1552.73	-5.00363	0.256423	-19.5131	8.49025e-85	1.72968e-82	0.153511	0.039194	0.0109841	0.796311	UP_BMP
TTC3	2	46848.8	-2.23356	0.117381	-19.0284	9.93099e-81	1.90418e-78	0.314109	0.00041793	0.00602527	0.679447	UP_BMP
DLX5	2	957.773	-3.17626	0.169404	-18.7497	1.94787e-78	3.48862e-76	0.190125	0.0189916	0.151108	0.639776	UP_BMP
FOXA2	2	1991.65	-4.12713	0.220155	-18.7465	2.06759e-78	3.66279e-76	0.20884	0.0261177	0.000927269	0.764115	UP_BMP
PPM1L	2	591.896	-3.994	0.214423	-18.6267	1.95128e-77	3.34757e-75	0.187451	0.00348168	0.0284352	0.780633	UP_BMP
LTBP3	2	6686.81	2.87939	0.155242	18.5477	8.5057e-77	1.43896e-74	0.0730783	0.39449	0.325576	0.206856	UP_TGF
FN1	2	840451	3.93904	0.212616	18.5265	1.26146e-76	2.09789e-74	0.178616	0.297336	0.171828	0.35222	UP_TGF
FGF13	2	636.051	-3.89425	0.210434	-18.5058	1.85458e-76	3.05313e-74	0.101411	0.0604662	0.0108808	0.827242	UP_BMP
LTBP2	2	19961	4.71212	0.255638	18.4328	7.17035e-76	1.15705e-73	0.0936427	0.0574415	0.0372886	0.811627	UP_TGF
ADGRD1	2	1259.16	-6.19767	0.338996	-18.2824	1.14192e-74	1.78952e-72	0.0114437	0.0455709	0.0179182	0.925067	UP_BMP
CYTL1	2	22978.6	-2.70219	0.148248	-18.2275	3.12406e-74	4.84913e-72	0.177624	0.218891	0.00925241	0.594233	UP_BMP
C5AR2	2	2148.54	-5.42282	0.300966	-18.018	1.40687e-72	2.12308e-70	0.19121	0.141852	0.127124	0.539813	UP_BMP
FGF18	2	260.171	5.37331	0.302732	17.7494	1.74196e-70	2.5577e-68	0.0362212	0.252476	0.0558379	0.655465	UP_TGF
PHOSPHO1	2	5303.37	-5.25257	0.29974	-17.5238	9.43275e-69	1.34855e-66	0.171539	0.247683	0.155583	0.425195	UP_BMP
CHSY3	2	2711.57	2.28118	0.130485	17.4824	1.95262e-68	2.76728e-66	0.108016	0.113003	0.0231259	0.755855	UP_TGF
RUNX2	2	3755.72	-3.47992	0.199312	-17.4596	2.90835e-68	4.0513e-66	0.0992597	0.0156365	0.00505362	0.88005	UP_BMP
DDR1	2	2567.24	-3.12624	0.179284	-17.4374	4.29184e-68	5.92783e-66	0.279804	0.286158	0.0161063	0.417931	UP_BMP
PDE4DIP	2	20643.7	-2.40112	0.138413	-17.3475	2.05941e-67	2.82052e-65	0.131057	0.350886	0.122544	0.395513	UP_BMP
DSC2	2	973.524	-3.5114	0.20319	-17.2813	6.50498e-67	8.61936e-65	0.217578	0.00516711	0.0488621	0.728392	UP_BMP
VWA1	2	999.279	2.62951	0.152714	17.2186	1.92668e-66	2.51208e-64	0.260041	0.35593	0.0863528	0.297676	UP_TGF
SELENBP1	2	1877.66	-2.8107	0.164192	-17.1184	1.08283e-65	1.3896e-63	0.19475	0.0617146	0.0565981	0.686937	UP_BMP
MYOM3	2	931.153	4.41907	0.259547	17.0261	5.26102e-65	6.54535e-63	0.0499734	0.0154358	0.0597661	0.874825	UP_TGF
BASP1	2	1730.91	2.83859	0.166984	16.9992	8.32275e-65	1.02003e-62	0.174348	0.101902	0.00581996	0.71793	UP_TGF
ZNF385B	2	2553.51	-4.6045	0.270866	-16.9992	8.32399e-65	1.02003e-62	0.0964515	0.0454426	0.002109	0.855997	UP_BMP
ANGPTL6	2	482.866	6.43248	0.380015	16.9269	2.84953e-64	3.44012e-62	0.246396	0.0447201	0.0118508	0.697033	UP_TGF
SERPINE1	2	20655.4	4.7584	0.282054	16.8705	7.41296e-64	8.81872e-62	0.0300461	0.385675	0.326111	0.258168	UP_TGF
ENPP2	2	5920	-3.16698	0.188331	-16.816	1.86255e-63	2.1997e-61	0.0232133	0.192076	0.0425352	0.742175	UP_BMP
GSDMC	2	466.227	-6.17557	0.37186	-16.6073	6.1741e-62	7.0863e-60	0.176965	0.0158504	0.00469815	0.802486	UP_BMP
C1orf74	2	425.739	-3.50956	0.215994	-16.2484	2.29178e-59	2.50681e-57	0.0470924	0.179982	0.0732032	0.699722	UP_BMP
SNTB1	2	294.729	5.59994	0.345718	16.198	5.20925e-59	5.62254e-57	0.0381723	0.0502586	0.00793623	0.903633	UP_TGF
STAC2	2	1658.16	4.72508	0.293085	16.1219	1.79154e-58	1.8717e-56	0.0577975	0.25935	0.208592	0.47426	UP_TGF
TMEM30B	2	1301.28	2.73805	0.170149	16.0921	2.89988e-58	2.99128e-56	0.146691	0.188857	0.00164956	0.662803	UP_TGF
PAPPA	2	5846.22	-3.3241	0.206728	-16.0796	3.54626e-58	3.63503e-56	0.111579	0.134695	0.110814	0.642912	UP_BMP
PKN3	2	585.417	3.52817	0.220555	15.9968	1.34578e-57	1.37085e-55	0.0172448	0.183466	0.0050291	0.794261	UP_TGF
SEMA3C	2	1420.36	2.96314	0.18533	15.9884	1.53855e-57	1.54785e-55	0.223241	0.00865884	0.00583091	0.762269	UP_TGF
SORD2P	2	422.671	-3.49886	0.219795	-15.9188	4.69629e-57	4.66709e-55	0.207368	0.00698953	0.00809849	0.777544	UP_BMP
DKK3	2	6194.71	2.25646	0.142454	15.8399	1.65068e-56	1.62065e-54	0.258865	0.0525701	0.0255336	0.663031	UP_TGF
SFXN3	2	2054.69	2.49534	0.158006	15.7927	3.49368e-56	3.40958e-54	0.104574	0.0843076	0.0657409	0.745377	UP_TGF
DOCK4	2	933.667	3.3495	0.212343	15.774	4.69998e-56	4.55954e-54	0.131886	0.0179929	0.0296604	0.82046	UP_TGF
RHOJ	2	1499.72	2.92491	0.185831	15.7396	8.09413e-56	7.80581e-54	0.13968	0.105603	0.0642163	0.690501	UP_TGF
EGR3	2	436.015	-6.11452	0.388517	-15.7381	8.29218e-56	7.94976e-54	0.191911	0.0410927	0.164869	0.602128	UP_BMP
SLC39A11	2	983.637	-2.94162	0.187876	-15.6572	2.96441e-55	2.80895e-53	0.00398353	0.0559131	0.007119	0.932984	UP_BMP
SPTLC3	2	2500.47	-2.82577	0.180493	-15.6559	3.02809e-55	2.8527e-53	0.00636888	0.0877137	0.172693	0.733225	UP_BMP
RXRA	2	8076.89	-2.21177	0.142592	-15.5112	2.91395e-54	2.69838e-52	0.280598	0.0550741	0.00652098	0.657807	UP_BMP
SLC44A2	2	31242.7	-2.83511	0.182829	-15.5069	3.11731e-54	2.85427e-52	0.16371	0.139023	0.0224108	0.674857	UP_BMP
ZNF365	2	526.093	3.35794	0.219319	15.3107	6.48386e-53	5.62096e-51	0.0315593	0.205647	0.00786802	0.754926	UP_TGF
CEP70	2	1076	-2.63457	0.172111	-15.3074	6.82894e-53	5.88879e-51	0.313245	0.000979196	0.0107797	0.674996	UP_BMP
GFOD1	2	1215.2	-2.70606	0.177206	-15.2707	1.19789e-52	1.01683e-50	0.262914	0.0114333	0.0392885	0.686364	UP_BMP
ITGBL1	2	10342.2	2.85591	0.188028	15.1887	4.19991e-52	3.51026e-50	0.0855264	0.251389	0.148994	0.51409	UP_TGF
MFAP5	2	3771.58	4.70843	0.310372	15.1703	5.56602e-52	4.62831e-50	0.143313	0.353649	0.189128	0.31391	UP_TGF
MMP23B	2	630.061	3.84838	0.255237	15.0777	2.27196e-51	1.87013e-49	0.0358707	0.0609381	0.0186818	0.884509	UP_TGF
CTHRC1	2	4224.31	3.77971	0.250985	15.0595	2.98894e-51	2.44309e-49	0.321017	0.0219569	0.00275292	0.654273	UP_TGF
TIFA	2	875.45	-2.94171	0.196355	-14.9816	9.68234e-51	7.81202e-49	0.0567841	0.0338391	0.00586772	0.903509	UP_BMP
BZW2	2	1673.07	-2.43611	0.162981	-14.9472	1.62544e-50	1.30499e-48	0.20559	0.292052	0.0974826	0.404875	UP_BMP
ADAM12	2	2662	3.18832	0.213426	14.9388	1.8424e-50	1.46476e-48	0.202091	0.0281387	0.0124405	0.75733	UP_TGF
LCTL	2	513.385	-2.59921	0.174152	-14.925	2.26775e-50	1.79416e-48	0.0221778	0.238838	0.192917	0.546068	UP_BMP
EPDR1	2	661.585	-3.15914	0.216875	-14.5666	4.57944e-48	3.39253e-46	0.0989665	0.0667379	0.0109347	0.823361	UP_BMP
COL4A2	2	15926.9	2.10183	0.144473	14.5483	5.98503e-48	4.39388e-46	0.184181	0.0149812	0.0542416	0.746596	UP_TGF
PKP1	2	634.663	4.21241	0.289541	14.5486	5.96143e-48	4.39388e-46	0.0667744	0.0568589	0.00531099	0.871056	UP_TGF
VSTM2L	2	800.759	-5.66955	0.390295	-14.5263	8.2568e-48	6.00756e-46	0.0209596	0.0188705	0.0201744	0.939996	UP_BMP
COL10A1	2	173064	-8.41584	0.58195	-14.4615	2.12235e-47	1.52379e-45	0.0427305	0.00843661	0.00630994	0.942523	UP_BMP
ALDH3B1	2	1427.76	-3.36802	0.2344	-14.3687	8.13324e-47	5.76328e-45	0.228451	0.223527	0.0439925	0.50403	UP_BMP
GLT8D2	2	1805.07	2.72803	0.190694	14.3058	2.01323e-46	1.40221e-44	0.0979617	0.268068	0.188502	0.445468	UP_TGF
FABP5	2	874.43	-2.48228	0.173687	-14.2916	2.46708e-46	1.70375e-44	0.128894	0.00548869	0.260745	0.604872	UP_BMP
GLIS2	2	1433.28	2.64335	0.185551	14.2459	4.75074e-46	3.26698e-44	0.0873241	0.152032	0.0224883	0.738156	UP_TGF
PLPP3	2	2374.2	3.01111	0.211526	14.2352	5.54339e-46	3.79606e-44	0.204139	0.0330099	0.0299069	0.732944	UP_TGF
NUP50	2	2432.6	-1.70398	0.120584	-14.1311	2.44242e-45	1.59865e-43	0.0657311	0.0729785	0.0154248	0.845866	UP_BMP
BNC2	2	306.637	3.25097	0.232545	13.98	2.06517e-44	1.29954e-42	0.0499869	0.140098	0.141836	0.668079	UP_TGF
C12orf49	2	1707.32	-2.33945	0.167528	-13.9646	2.56507e-44	1.60174e-42	0.0577646	0.205805	0.39414	0.34229	UP_BMP
ALCAM	2	18120.3	1.82944	0.131129	13.9514	3.08422e-44	1.91857e-42	0.0463982	0.229225	0.00587793	0.718499	UP_TGF
L3MBTL4	2	599.979	-4.05518	0.291237	-13.924	4.52919e-44	2.80672e-42	0.0746699	0.338879	0.101284	0.485168	UP_BMP
TMEM245	2	4249.01	-1.94712	0.140917	-13.8175	1.99862e-43	1.21998e-41	0.300395	0.0601721	0.0130598	0.626373	UP_BMP
RAI14	2	1331.11	1.91269	0.139218	13.7388	5.94578e-43	3.60239e-41	0.156313	0.200135	0.106881	0.536671	UP_TGF
ZDHHC23	2	272.478	-5.18697	0.378231	-13.7138	8.39706e-43	5.03144e-41	0.330234	0.00639269	0.0149613	0.648412	UP_BMP
SCARA3	2	1666.21	1.99705	0.14703	13.5826	5.07728e-42	3.00907e-40	0.369141	0.0345276	0.00268027	0.593651	UP_TGF
FAT1	2	16163.9	1.95076	0.143654	13.5795	5.29622e-42	3.12746e-40	0.220835	0.106981	0.0505977	0.621586	UP_TGF
PLP2	2	1484.15	2.77779	0.206377	13.4598	2.69717e-41	1.56994e-39	0.108151	0.215017	0.211932	0.4649	UP_TGF
ZFP36L2	2	3733.95	2.31012	0.171725	13.4524	2.97924e-41	1.72796e-39	0.0204899	0.443731	0.228188	0.307591	UP_TGF
CHAD	2	56005.9	-4.33151	0.322477	-13.432	3.92758e-41	2.2619e-39	0.0342381	0.0622385	0.00184387	0.901679	UP_BMP
COL14A1	2	9207.58	2.60925	0.194532	13.413	5.07723e-41	2.91369e-39	0.149306	0.30649	0.0835542	0.46065	UP_TGF
CNRIP1	2	959.107	2.28693	0.17126	13.3536	1.12902e-40	6.36704e-39	0.072576	0.0223155	0.00379577	0.901313	UP_TGF
SSTR2	2	488.074	-4.38674	0.32925	-13.3234	1.69157e-40	9.50664e-39	0.127735	0.0614955	0.0278051	0.782965	UP_BMP
NPR3	2	7699.84	-4.51174	0.339291	-13.2976	2.39091e-40	1.33449e-38	0.163421	0.0510364	0.00328228	0.782261	UP_BMP
ALPK2	2	4047.32	-3.76999	0.283709	-13.2882	2.70844e-40	1.50656e-38	0.00412602	0.429225	0.0857525	0.480896	UP_BMP
CYS1	2	508.852	3.21257	0.242484	13.2486	4.59789e-40	2.54022e-38	0.0569037	0.142939	0.0182316	0.781926	UP_TGF
SERTAD4-AS1	2	199.976	4.87786	0.369513	13.2008	8.68396e-40	4.73348e-38	0.0845034	0.106136	0.0276492	0.781712	UP_TGF
PDLIM7	2	2691.5	1.95091	0.147834	13.1967	9.17212e-40	4.98291e-38	0.0789064	0.404345	0.0779836	0.438765	UP_TGF
PTMS	2	3184.92	2.03989	0.155165	13.1466	1.77905e-39	9.50655e-38	0.0082308	0.368465	0.10512	0.518184	UP_TGF
COLEC12	2	1473.09	3.76922	0.286851	13.14	1.94315e-39	1.03495e-37	0.040136	0.139426	0.0676164	0.752822	UP_TGF
CD1D	2	159.276	-5.24426	0.39921	-13.1366	2.03191e-39	1.0787e-37	0.0625028	0.0385598	0.024909	0.874028	UP_BMP
WDR86	2	191.379	-5.71483	0.435164	-13.1326	2.14187e-39	1.13339e-37	0.051388	0.0305645	0.0181295	0.899918	UP_BMP
RGCC	2	3532.47	-2.65797	0.20339	-13.0683	4.99437e-39	2.62575e-37	0.131573	0.146172	0.194517	0.527738	UP_BMP
ZC3H12C	2	729.797	-2.10603	0.161525	-13.0384	7.396e-39	3.86346e-37	0.369363	0.0158694	0.00846454	0.606303	UP_BMP
THBS2	2	11024.6	2.46584	0.189658	13.0015	1.19965e-38	6.20693e-37	0.0307384	0.204961	0.0225272	0.741773	UP_TGF
TMEM63C	2	573.391	-3.8457	0.296288	-12.9796	1.59763e-38	8.21392e-37	0.37767	0.0048153	0.0267691	0.590746	UP_BMP
GPR68	2	159.801	4.78755	0.371437	12.8893	5.17241e-38	2.60185e-36	0.241411	0.110531	0.0330239	0.615034	UP_TGF
CCDC88A	2	10534.8	-1.74843	0.135669	-12.8874	5.29762e-38	2.65664e-36	0.0220741	0.308376	0.262522	0.407027	UP_BMP
AP1M2	2	179.191	-5.02289	0.39262	-12.7933	1.78816e-37	8.77813e-36	0.0919716	0.233517	0.0205533	0.653958	UP_BMP
GSE1	2	1914.41	-2.57032	0.201207	-12.7745	2.27602e-37	1.11395e-35	0.096633	0.00766876	0.0241713	0.871527	UP_BMP
PLXNB3	2	618.224	-3.43594	0.26988	-12.7314	3.95823e-37	1.91428e-35	0.0149033	0.30717	0.0436448	0.634282	UP_BMP
RIN2	2	977.481	1.80556	0.143279	12.6017	2.06636e-36	9.70533e-35	0.0906423	0.139171	0.340021	0.430166	UP_TGF
ARHGAP31	2	5886.38	-2.09428	0.166322	-12.5918	2.34402e-36	1.09778e-34	0.141376	0.212086	0.0233235	0.623215	UP_BMP
S100P	2	3492.89	-8.78561	0.698203	-12.5832	2.61339e-36	1.21695e-34	0.133717	0.197082	0.0537115	0.61549	UP_BMP
PPP1R14C	2	197.331	3.72395	0.298296	12.4841	9.11861e-36	4.21006e-34	0.0170604	0.00519015	0.00849687	0.969253	UP_TGF
SULF2	2	4667.39	3.7876	0.30418	12.4519	1.36629e-35	6.25502e-34	0.155646	0.0346893	0.164243	0.645421	UP_TGF
LIFR	2	4804.52	-3.20648	0.258108	-12.423	1.96039e-35	8.89986e-34	0.194475	0.0376773	0.000496826	0.767351	UP_BMP
TMEM164	2	6909.02	-3.41127	0.275254	-12.3932	2.84563e-35	1.27986e-33	0.194448	0.0972357	0.00161512	0.706701	UP_BMP
REPS2	2	1274.75	-2.40933	0.194462	-12.3898	2.969e-35	1.32936e-33	0.293383	0.00214154	0.00428908	0.700186	UP_BMP
LRP4	2	6013.86	-2.96243	0.240941	-12.2952	9.60905e-35	4.24413e-33	0.125399	0.353512	0.235068	0.286021	UP_BMP
RBPMS	2	924.425	-3.26162	0.265977	-12.2628	1.43455e-34	6.30196e-33	0.0310865	0.138732	0.125903	0.704279	UP_BMP
CELSR2	2	629.548	3.50261	0.286884	12.2091	2.77778e-34	1.21049e-32	0.220013	0.0611521	0.024717	0.694118	UP_TGF
DISP1	2	986.097	-2.14192	0.177971	-12.0352	2.32046e-33	9.79762e-32	0.0827475	0.261476	0.00513057	0.650646	UP_BMP
RASGRF2	2	555.991	-3.43091	0.285536	-12.0157	2.9388e-33	1.23445e-31	0.0641268	0.00107799	0.0166813	0.918114	UP_BMP
CRIP2	2	1982.72	1.97615	0.164606	12.0053	3.33093e-33	1.39557e-31	0.0405646	0.0296395	0.0506855	0.87911	UP_TGF
IDS	2	4167.48	1.59333	0.132788	11.999	3.59418e-33	1.49816e-31	0.0465856	0.208749	0.00587299	0.738793	UP_TGF
DDAH1	2	2282.38	2.2846	0.19133	11.9406	7.27101e-33	3.00769e-31	0.176303	0.140746	0.0528643	0.630087	UP_TGF
AGL	2	1063.12	-1.96428	0.164775	-11.921	9.2032e-33	3.78772e-31	0.0922809	0.336705	0.13118	0.439834	UP_BMP
LTBP4	2	4118.48	2.24226	0.188722	11.8813	1.48086e-32	6.00376e-31	0.0164397	0.323565	0.0134668	0.646529	UP_TGF
MET	2	488.119	2.09101	0.176789	11.8277	2.8084e-32	1.12737e-30	0.0594051	0.0276074	0.00704574	0.905942	UP_TGF
PLAT	2	405.409	2.83469	0.239898	11.8162	3.21777e-32	1.28853e-30	0.313016	0.0106995	0.00373211	0.672552	UP_TGF
COL8A2	2	5212.53	4.17014	0.353583	11.794	4.19375e-32	1.65897e-30	0.105514	0.0216001	0.0829278	0.789959	UP_TGF
FXYD6	2	3745.46	2.0859	0.177427	11.7564	6.54555e-32	2.55214e-30	0.00873099	0.266628	0.0183559	0.706285	UP_TGF
MTMR2	2	2884.84	-1.4511	0.123835	-11.718	1.03068e-31	3.98058e-30	0.0468629	0.407925	0.0750224	0.47019	UP_BMP
PKNOX2	2	560.933	3.18456	0.272589	11.6827	1.56334e-31	5.98106e-30	0.0470249	0.382183	0.00444297	0.566349	UP_TGF
MAOB	2	803.855	3.42152	0.293436	11.6602	2.03545e-31	7.75091e-30	0.114296	0.142499	0.107637	0.635568	UP_TGF
ADORA1	2	121.467	5.11594	0.441034	11.5999	4.12744e-31	1.55715e-29	0.225471	0.180012	0.0481524	0.546365	UP_TGF
SLC25A10	2	817.753	-3.17805	0.274024	-11.5977	4.23131e-31	1.59266e-29	0.144432	0.163785	0.00345693	0.688326	UP_BMP
PTGFRN	2	1919.31	1.70114	0.146817	11.5868	4.80908e-31	1.8018e-29	0.0181951	0.216995	0.174133	0.590676	UP_TGF
S100A6	2	2348.53	1.7968	0.156054	11.514	1.12201e-30	4.175e-29	0.281328	0.178754	0.0479515	0.491967	UP_TGF
LDOC1	2	1224.18	-1.72536	0.149865	-11.5128	1.13775e-30	4.22391e-29	0.158946	0.0175706	0.0195602	0.803923	UP_BMP
PTPN13	2	1351.22	-1.87254	0.163271	-11.469	1.88925e-30	6.9663e-29	0.271245	0.0271846	0.00962883	0.691942	UP_BMP
F3	2	1499.99	3.18855	0.278549	11.447	2.43336e-30	8.89213e-29	0.0265957	0.367779	0.0106005	0.595025	UP_TGF
PTCH1	2	2856.11	-2.45791	0.215396	-11.4111	3.67946e-30	1.34156e-28	0.30251	0.013206	0.101164	0.583119	UP_BMP
FAM43B	2	189.304	3.22223	0.282965	11.3874	4.83316e-30	1.75828e-28	0.103924	0.320603	0.0207249	0.554748	UP_TGF
NFKBIZ	2	1282.07	2.77141	0.244048	11.356	6.92393e-30	2.49739e-28	0.197336	0.0990311	0.0953976	0.608236	UP_TGF
GRIK2	2	299.438	-2.60214	0.229339	-11.3462	7.74234e-30	2.78553e-28	0.192949	0.0437078	0.0382039	0.725139	UP_BMP
CANT1	2	3866.16	-1.65718	0.146766	-11.2913	1.44857e-29	5.16604e-28	0.31817	0.0160304	0.00346687	0.662333	UP_BMP
RGS16	2	224.006	4.60339	0.410025	11.2271	3.00223e-29	1.05681e-27	0.301651	0.167811	0.0301559	0.500383	UP_TGF
FZD6	2	420.018	2.34341	0.209031	11.2108	3.60835e-29	1.26199e-27	0.0870358	0.0228516	0.00289026	0.887222	UP_TGF
FXYD3	2	155.521	-6.0486	0.539796	-11.2054	3.83833e-29	1.33669e-27	0.281158	0.0511303	0.00988019	0.657832	UP_BMP
BTBD19	2	1477.52	2.34622	0.211142	11.1121	1.09585e-28	3.74428e-27	0.0241428	0.34904	0.0869011	0.539916	UP_TGF
ARHGAP29	2	385.13	2.0861	0.189446	11.0116	3.36028e-28	1.12456e-26	0.178044	0.0438975	0.006913	0.771145	UP_TGF
NPIPA1	2	4306.81	1.56362	0.142591	10.9658	5.57973e-28	1.84834e-26	0.000510432	0.035643	0.358605	0.605241	UP_TGF
CAB39L	2	674.895	-1.6802	0.153893	-10.918	9.45439e-28	3.08793e-26	0.222411	0.0217253	0.0519683	0.703895	UP_BMP
COL4A1	2	13148.5	1.90696	0.175338	10.8759	1.50099e-27	4.86344e-26	0.227387	0.0224839	0.0708146	0.679314	UP_TGF
ITPRIPL2	2	4307.9	1.19878	0.110387	10.8598	1.79094e-27	5.79142e-26	0.124092	0.372818	0.120443	0.382647	UP_TGF
RIPPLY3	2	222.793	-2.38743	0.220295	-10.8374	2.28857e-27	7.38598e-26	0.132208	0.296573	0.118899	0.45232	UP_BMP
AQP1	2	2145.66	3.77589	0.350017	10.7877	3.93478e-27	1.26238e-25	0.138784	0.0970886	0.136064	0.628064	UP_TGF
ACSL1	2	7149.52	-2.79014	0.258823	-10.7801	4.27379e-27	1.36577e-25	0.187868	0.0777432	0.0803517	0.654037	UP_BMP
SLC25A13	2	937.192	-1.89362	0.176846	-10.7077	9.36109e-27	2.94531e-25	0.0818399	0.424075	0.0702611	0.423824	UP_BMP
PSD3	2	3418.56	-1.73198	0.163288	-10.6069	2.76765e-26	8.54301e-25	0.00318498	0.112859	0.0837212	0.800234	UP_BMP
PSIP1	2	949.703	1.66232	0.157628	10.5459	5.30884e-26	1.62029e-24	0.148245	0.0223509	0.0153074	0.814097	UP_TGF
SYTL4	2	747.534	-2.86032	0.271605	-10.5312	6.20304e-26	1.88614e-24	0.207105	0.0023207	0.00980288	0.780771	UP_BMP
PRKAR2B	2	427.726	-2.97414	0.284007	-10.4721	1.16095e-25	3.48456e-24	0.230053	0.0764828	0.0137553	0.679709	UP_BMP
NGF	2	138.838	3.14824	0.300953	10.4609	1.30584e-25	3.89791e-24	0.0582776	0.100833	0.012922	0.827967	UP_TGF
FAM177B	2	105.399	-6.11665	0.587375	-10.4135	2.1509e-25	6.31627e-24	0.0789568	0.0317628	0.000156806	0.889124	UP_BMP
DIXDC1	2	1363.27	1.64603	0.15807	10.4133	2.15717e-25	6.3233e-24	0.339954	0.0078477	0.00564787	0.646551	UP_TGF
NFIX	2	9566.45	1.39655	0.134475	10.3852	2.8955e-25	8.44202e-24	0.0639958	0.170276	0.00518354	0.760544	UP_TGF
SEMA3A	2	1190.05	2.27964	0.219929	10.3653	3.56569e-25	1.03221e-23	0.186629	0.391264	0.217256	0.204851	UP_TGF
FAIM2	2	88.6089	4.03321	0.390105	10.3388	4.70466e-25	1.35471e-23	0.0718291	0.188928	0.0427381	0.696505	UP_TGF
HTATIP2	2	1280.75	-1.49592	0.145194	-10.3029	6.8385e-25	1.95533e-23	0.225703	0.0108804	0.0841863	0.67923	UP_BMP
CHORDC1	2	1466.03	-1.53534	0.149145	-10.2943	7.47907e-25	2.13101e-23	0.134399	0.00850301	0.0417211	0.815377	UP_BMP
CDR2L	2	673.518	1.7224	0.167444	10.2864	8.11176e-25	2.30593e-23	0.0332238	0.0978652	0.219811	0.6491	UP_TGF
TGFB3	2	1496.39	2.59828	0.252809	10.2776	8.89046e-25	2.51121e-23	0.119037	0.097336	0.030898	0.752729	UP_TGF
HACD4	2	925.751	-1.85025	0.18051	-10.2501	1.1819e-24	3.2984e-23	0.186958	0.12149	0.163581	0.52797	UP_BMP
HOPX	2	445.362	3.01056	0.296296	10.1607	2.97086e-24	8.17889e-23	0.260709	0.204827	0.0411474	0.493317	UP_TGF
KIFC3	2	1215.51	2.24769	0.221926	10.1281	4.14576e-24	1.13559e-22	0.0142559	0.278417	0.169465	0.537862	UP_TGF
SLC7A8	2	894.027	-2.10134	0.207745	-10.115	4.73949e-24	1.28955e-22	0.271498	0.014842	0.0178566	0.695803	UP_BMP
CYGB	2	610.749	2.53244	0.250892	10.0937	5.88781e-24	1.58088e-22	0.0447152	0.0677416	0.185986	0.701557	UP_TGF
TALDO1	2	3585.53	-1.55167	0.154037	-10.0734	7.24484e-24	1.93568e-22	0.244385	0.179378	0.0734262	0.502811	UP_BMP
AOC3	2	491.707	-1.9362	0.192602	-10.0528	8.92524e-24	2.37686e-22	0.103972	0.192804	0.00606146	0.697162	UP_BMP
NRP2	2	2022.08	2.31574	0.230499	10.0466	9.50608e-24	2.52741e-22	0.00843114	0.0171956	0.008997	0.965376	UP_TGF
GSR	2	2288.86	-1.75917	0.175678	-10.0136	1.32865e-23	3.50395e-22	0.207652	0.0202525	0.00749353	0.764602	UP_BMP
FGD3	2	248.42	-4.34542	0.434212	-10.0076	1.41154e-23	3.71651e-22	0.00743593	0.125127	0.014524	0.852913	UP_BMP
PRCP	2	2672.25	-1.3231	0.132372	-9.99536	1.59712e-23	4.18487e-22	0.194989	0.000792238	0.0181155	0.786103	UP_BMP
LRRC75B	2	466.853	2.43925	0.24554	9.93424	2.95431e-23	7.59453e-22	0.247433	0.022018	0.0556308	0.674918	UP_TGF
DLX3	2	148.201	-4.82506	0.488402	-9.87927	5.12035e-23	1.29182e-21	0.153787	0.0155694	0.0191514	0.811492	UP_BMP
SMOC1	2	1452.17	2.54866	0.258804	9.84787	7.00128e-23	1.76091e-21	0.260028	0.271285	0.0194931	0.449193	UP_TGF
APCDD1L	2	1074.64	2.60209	0.264373	9.8425	7.38523e-23	1.85176e-21	0.00174008	0.0340888	0.00279827	0.961373	UP_TGF
ADAMTSL4	2	1366.68	3.52611	0.358349	9.83987	7.58081e-23	1.89788e-21	0.143264	0.0213481	0.0833184	0.75207	UP_TGF
LCN2	2	90.6312	-4.95567	0.503803	-9.83653	7.83695e-23	1.956e-21	0.226548	0.0652846	0.0293395	0.678828	UP_BMP
CLIP2	2	881.904	1.94578	0.19944	9.75625	1.73455e-22	4.25749e-21	0.161445	0.322531	0.0561624	0.459862	UP_TGF
CHD5	2	218.676	-2.96359	0.304407	-9.73562	2.12523e-22	5.18465e-21	0.299872	0.0480744	0.0346997	0.617354	UP_BMP
FNDC1	2	5866.42	2.03671	0.209342	9.72911	2.26575e-22	5.51152e-21	0.219656	0.2092	0.0112742	0.559871	UP_TGF
ZFHX4	2	1936.37	-2.47833	0.255161	-9.71284	2.6583e-22	6.43759e-21	0.0307443	0.256807	0.420107	0.292342	UP_BMP
CAPN2	2	4545.37	1.52207	0.15689	9.70151	2.97073e-22	7.18354e-21	0.095836	0.233763	0.0349159	0.635485	UP_TGF
PALD1	2	258.362	2.20229	0.227191	9.69359	3.21032e-22	7.73991e-21	0.0860964	0.461333	0.0167059	0.435865	UP_TGF
PAPSS1	2	6875.1	-1.42014	0.146814	-9.67308	3.92377e-22	9.41821e-21	0.245706	0.0133216	0.124874	0.616099	UP_BMP
AP1S2	2	793.623	1.58756	0.165534	9.59054	8.76213e-22	2.07868e-20	0.170185	0.00174918	0.00876549	0.8193	UP_TGF
KIAA1217	2	1583.37	2.66696	0.280383	9.51182	1.87349e-21	4.36201e-20	0.081903	0.000990837	0.077181	0.839925	UP_TGF
COL18A1	2	1946.44	1.84477	0.194145	9.50201	2.05881e-21	4.77985e-20	0.165813	0.034889	0.0481155	0.751183	UP_TGF
SPTBN1	2	18677	-1.03228	0.109232	-9.45038	3.37617e-21	7.72819e-20	0.0724854	0.00708254	0.0705441	0.849888	UP_BMP
CHD7	2	595.685	-2.17936	0.230943	-9.43679	3.84376e-21	8.77389e-20	0.0220597	0.0046898	0.112754	0.860496	UP_BMP
PRSS23	2	2415.76	2.03605	0.216341	9.4113	4.9002e-21	1.1123e-19	0.210666	0.199439	0.0208596	0.569036	UP_TGF
SELENOW	2	3963.56	-1.77702	0.189014	-9.40151	5.37856e-21	1.21919e-19	0.00680538	0.0754766	0.182573	0.735145	UP_BMP
PTGS1	2	113.212	3.41874	0.364876	9.36958	7.28189e-21	1.63022e-19	0.00909332	0.00229809	0.027391	0.961218	UP_TGF
FAM49A	2	182.205	4.47044	0.477405	9.36404	7.6747e-21	1.71346e-19	0.0415349	0.166974	0.0135211	0.77797	UP_TGF
CPNE5	2	1053.44	-2.85069	0.305156	-9.34173	9.47768e-21	2.10733e-19	0.0402472	0.0678413	0.20546	0.686452	UP_BMP
HRCT1	2	213.373	2.53202	0.271577	9.32338	1.12687e-20	2.48186e-19	0.175409	0.171605	0.00536314	0.647622	UP_TGF
IFITM10	2	5107.3	2.22705	0.239499	9.29881	1.42021e-20	3.11528e-19	0.10467	0.213403	0.189957	0.49197	UP_TGF
PTMA	2	10018.9	1.50371	0.162413	9.25857	2.07193e-20	4.51448e-19	0.07006	0.209208	0.19406	0.526672	UP_TGF
LAMB3	2	356.091	3.20067	0.346549	9.23583	2.56291e-20	5.56195e-19	0.160721	0.0425181	0.00816225	0.788599	UP_TGF
SPSB4	2	144.597	3.46497	0.375402	9.23002	2.70575e-20	5.85635e-19	0.065318	0.131979	0.0843298	0.718374	UP_TGF
NACC1	2	1452.17	-1.55708	0.170335	-9.14127	6.17255e-20	1.31676e-18	0.239621	0.0626711	0.0457045	0.652003	UP_BMP
ALPL	2	2427.24	-9.83716	1.07684	-9.13518	6.52997e-20	1.39118e-18	0.104185	0.0707538	0.00315841	0.821903	UP_BMP
GREM1	2	4966.09	3.11586	0.341817	9.11558	7.82536e-20	1.65633e-18	0.155627	0.362215	0.0618906	0.420268	UP_TGF
ARFGEF2	2	5140.82	-1.26832	0.139194	-9.11185	8.09858e-20	1.71194e-18	0.180666	0.154885	0.0155534	0.648895	UP_BMP
COL24A1	2	895.577	1.78778	0.196264	9.10909	8.30757e-20	1.75384e-18	0.000171472	0.295609	0.049378	0.654842	UP_TGF
BMP2K	2	709.129	-2.06326	0.227491	-9.06964	1.19413e-19	2.50154e-18	0.175933	0.00505483	0.0140652	0.804947	UP_BMP
MYO5C	2	903.652	-2.60368	0.288	-9.04055	1.55889e-19	3.24895e-18	0.0142514	0.215823	0.000869239	0.769056	UP_BMP
OLFML2A	2	1760.77	-3.02586	0.33513	-9.02892	1.73369e-19	3.59031e-18	0.10948	0.386887	0.0365792	0.467053	UP_BMP
UCP2	2	204.826	-2.80535	0.310924	-9.02262	1.83641e-19	3.7982e-18	0.199376	0.00091988	0.0902111	0.709493	UP_BMP
PHLPP1	2	425.517	-1.75657	0.19517	-9.00025	2.25209e-19	4.63441e-18	0.31695	0.0145481	0.0302718	0.63823	UP_BMP
LAMC2	2	1190.68	3.25491	0.363103	8.96415	3.12684e-19	6.37813e-18	0.210242	0.0949095	0.00507717	0.689772	UP_TGF
EMID1	2	216.872	-2.72315	0.3044	-8.94596	3.68735e-19	7.49332e-18	0.180015	0.180982	0.00507061	0.633932	UP_BMP
RAB27B	2	110.072	-4.17165	0.466425	-8.94389	3.75698e-19	7.62531e-18	0.00028469	0.309379	0.273473	0.416863	UP_BMP
C1orf112	2	439.938	-1.97594	0.220974	-8.94196	3.82324e-19	7.75015e-18	0.166045	0.0378398	0.00712888	0.788986	UP_BMP
RALGPS2	2	295.706	-2.32949	0.261709	-8.90106	5.53155e-19	1.113e-17	0.17302	0.0849286	0.0036147	0.738436	UP_BMP
PXDN	2	10943.9	1.77463	0.199623	8.88988	6.11738e-19	1.22483e-17	0.0307513	0.235397	0.0541339	0.679717	UP_TGF
DAAM2	2	4274.45	-1.77836	0.200847	-8.85432	8.41918e-19	1.67541e-17	0.248555	0.0301714	0.0405627	0.680711	UP_BMP
MPZL3	2	536.013	-1.58185	0.179009	-8.8367	9.8585e-19	1.95229e-17	0.18738	0.165309	0.106718	0.540592	UP_BMP
FXYD5	2	1543.7	1.39967	0.158467	8.83261	1.02264e-18	2.02024e-17	0.146144	0.0434384	0.0902053	0.720212	UP_TGF
BMPR1B	2	536.565	2.25777	0.255656	8.8313	1.03465e-18	2.0415e-17	0.0808212	0.0873924	0.0830262	0.74876	UP_TGF
TLN2	2	3173.09	-1.47354	0.167443	-8.80024	1.36523e-18	2.68079e-17	0.0557096	0.133007	0.0676802	0.743603	UP_BMP
LGALS3	2	3154.37	-1.5784	0.18009	-8.76449	1.87628e-18	3.65348e-17	0.1754	0.368647	0.178593	0.277359	UP_BMP
COL12A1	2	162334	1.47588	0.168591	8.75423	2.05511e-18	3.99215e-17	0.0532253	0.117007	0.21716	0.612608	UP_TGF
STAT5B	2	1721.42	1.09728	0.125415	8.74923	2.14805e-18	4.16774e-17	0.23545	0.0206452	0.0111974	0.732707	UP_TGF
GALNT18	2	852.989	1.2599	0.144657	8.70959	3.04973e-18	5.88915e-17	0.182504	0.337479	0.00350398	0.476513	UP_TGF
HOOK2	2	1127.62	1.80091	0.207075	8.69689	3.41115e-18	6.5715e-17	0.225029	0.399378	0.0432664	0.332327	UP_TGF
NEK7	2	1151.28	1.32116	0.152783	8.64732	5.27234e-18	1.00267e-16	0.14186	0.273959	0.210413	0.373768	UP_TGF
TIMP2	2	13894.1	1.54245	0.178964	8.61876	6.76852e-18	1.27677e-16	0.0458843	0.183883	0.162314	0.607918	UP_TGF
SOX11	2	521.65	3.29967	0.382979	8.61581	6.94492e-18	1.30854e-16	0.21183	0.273897	0.0676812	0.446591	UP_TGF
FYN	2	671.359	-2.01909	0.234576	-8.6074	7.47359e-18	1.40652e-16	0.0967453	0.00163581	0.00335146	0.898267	UP_BMP
RTL3	2	203.375	2.11639	0.246081	8.60039	7.94446e-18	1.48826e-16	0.190694	0.350939	0.0364375	0.42193	UP_TGF
PFKP	2	3355.84	2.1409	0.249011	8.59762	8.13841e-18	1.5211e-16	0.0242043	0.411857	0.213449	0.350489	UP_TGF
RAPGEF3	2	451.457	3.33641	0.388271	8.59298	8.47409e-18	1.58021e-16	0.0624724	0.101092	0.0619373	0.774499	UP_TGF
ABCA8	2	257.276	-2.48207	0.289914	-8.5614	1.11503e-17	2.0511e-16	0.183888	0.0324702	0.0673279	0.716314	UP_BMP
HLA-E	2	1485.99	1.41991	0.165996	8.55387	1.19033e-17	2.18715e-16	0.199141	0.030362	0.0340987	0.736398	UP_TGF
INSC	2	390.612	2.84442	0.334453	8.50471	1.8205e-17	3.31144e-16	0.0878557	0.0113664	0.169838	0.73094	UP_TGF
FNIP2	2	1109.99	-1.15606	0.136337	-8.47947	2.26221e-17	4.08753e-16	0.142045	0.274586	0.0234151	0.559954	UP_BMP
SGK1	2	1113.92	2.00828	0.236928	8.47632	2.32431e-17	4.19509e-16	0.199542	0.0243383	0.018291	0.757829	UP_TGF
ETV1	2	228.836	2.78308	0.328894	8.46194	2.62961e-17	4.7096e-16	0.336612	0.000871373	0.0211495	0.641367	UP_TGF
B4GALT1	2	4418.03	1.52493	0.180297	8.45789	2.72258e-17	4.87076e-16	0.0493885	0.162051	0.392468	0.396093	UP_TGF
PODXL	2	450.126	2.12537	0.251613	8.44699	2.98919e-17	5.33017e-16	0.206496	0.0736386	0.0977575	0.622108	UP_TGF
C12orf57	2	1404.87	1.23265	0.146015	8.44194	3.12103e-17	5.54707e-16	0.175218	0.291636	0.238797	0.294349	UP_TGF
NR5A2	2	157.972	-2.09956	0.249353	-8.42003	3.76399e-17	6.63913e-16	0.0720058	0.0355042	0.130521	0.761969	UP_BMP
CCDC9B	2	373.181	-1.60393	0.190683	-8.4115	4.04812e-17	7.13257e-16	0.293981	0.0241172	0.0558809	0.626021	UP_BMP
ZBED6	2	932.346	-1.63952	0.195069	-8.40483	4.28484e-17	7.53337e-16	0.153531	0.0729806	0.160907	0.612581	UP_BMP
KLHL29	2	2123.9	1.73087	0.206039	8.40069	4.43862e-17	7.78694e-16	0.0523708	0.0188876	0.0363729	0.892369	UP_TGF
TMEM47	2	2131.75	1.1146	0.132864	8.38902	4.90201e-17	8.56301e-16	0.0802444	0.0476241	0.204705	0.667426	UP_TGF
SLC9A3R1	2	465.522	1.56459	0.187097	8.36246	6.14248e-17	1.06614e-15	0.227705	0.109255	0.0199885	0.643052	UP_TGF
CCNH	2	565.785	-1.38133	0.165267	-8.35816	6.37035e-17	1.10451e-15	0.329583	0.0291342	0.00466195	0.636621	UP_BMP
EGR1	2	411.971	2.45258	0.293518	8.3558	6.49923e-17	1.12336e-15	0.00886207	0.314917	0.266088	0.410133	UP_TGF
NALCN	2	705.988	1.81838	0.217661	8.35422	6.58672e-17	1.13719e-15	0.163925	0.0559839	0.0207817	0.75931	UP_TGF
MEF2A	2	5009.82	1.46289	0.175295	8.34532	7.10186e-17	1.22353e-15	0.0416885	0.293029	0.192143	0.47314	UP_TGF
SSBP4	2	914.088	1.49129	0.178802	8.34048	7.39908e-17	1.27339e-15	0.210739	0.00163958	0.192522	0.595099	UP_TGF
PHF2	2	1769.69	1.07038	0.128805	8.31009	9.56277e-17	1.63712e-15	0.249628	0.190092	0.087586	0.472694	UP_TGF
SALL2	2	342.317	2.10625	0.253964	8.2935	1.09963e-16	1.87467e-15	0.307362	0.0324047	0.0418697	0.618363	UP_TGF
MAMLD1	2	408.53	2.30447	0.277928	8.2916	1.11739e-16	1.90294e-15	0.108796	0.202385	0.0431996	0.645619	UP_TGF
NUMA1	2	8355.95	1.05044	0.127013	8.27029	1.33632e-16	2.26396e-15	0.151942	0.20955	0.0628415	0.575667	UP_TGF
SLC38A1	2	1585.57	-1.68243	0.203958	-8.24892	1.59838e-16	2.69672e-15	0.245672	0.0370761	0.0405491	0.676703	UP_BMP
ARHGAP4	2	397.158	2.15068	0.26094	8.24205	1.69278e-16	2.85304e-15	0.00547272	0.00840329	0.0786086	0.907515	UP_TGF
APC	2	1477.25	-1.56879	0.190371	-8.24071	1.71196e-16	2.87941e-15	0.122292	0.401218	0.271999	0.20449	UP_BMP
PPP2R2A	2	1497.78	-1.04963	0.127616	-8.22488	1.95387e-16	3.27278e-15	0.017317	0.0231582	0.0355234	0.924001	UP_BMP
RASSF1	2	778.186	1.32628	0.161264	8.22426	1.96404e-16	3.28307e-15	0.325511	0.00691115	0.0404588	0.62712	UP_TGF
RIMS3	2	321.721	-2.08736	0.253826	-8.22358	1.97513e-16	3.29822e-15	0.0975532	0.0542321	0.000681283	0.847533	UP_BMP
SPATA13	2	989.525	1.28248	0.155972	8.22249	1.99316e-16	3.32492e-15	0.166676	0.027607	0.0315746	0.774143	UP_TGF
SLIT3	2	924.948	-1.88567	0.22964	-8.21142	2.18579e-16	3.62402e-15	0.110595	0.345725	0.176472	0.367208	UP_BMP
SYT17	2	187.368	1.87201	0.228193	8.20362	2.33248e-16	3.85545e-15	0.0632027	0.371629	0.313075	0.252093	UP_TGF
ATRNL1	2	878.343	1.35478	0.165812	8.17053	3.07027e-16	5.0392e-15	0.198237	0.35565	0.0123081	0.433804	UP_TGF
PHLDB1	2	8729.91	1.03688	0.127376	8.14031	3.94267e-16	6.41934e-15	0.04857	0.000869076	0.312162	0.638399	UP_TGF
TBC1D7	2	379.069	-1.48786	0.183653	-8.10147	5.42973e-16	8.78785e-15	0.17628	0.176301	0.0247342	0.622685	UP_BMP
ABTB2	2	914.312	1.29149	0.159526	8.09578	5.68997e-16	9.19079e-15	0.000259184	0.0595916	0.364733	0.575416	UP_TGF
PMP2	2	93.7823	-3.61303	0.446741	-8.08752	6.08917e-16	9.79677e-15	0.00583151	0.169876	0.115798	0.708495	UP_BMP
B4GALNT4	2	665.362	2.51624	0.311375	8.08105	6.42116e-16	1.03207e-14	0.247228	0.107119	0.0460155	0.599638	UP_TGF
SIPA1L2	2	718.041	2.40464	0.297943	8.07079	6.98441e-16	1.11929e-14	0.225808	0.0282119	0.208077	0.537903	UP_TGF
TBC1D22B	2	599.095	-1.28302	0.159974	-8.02019	1.05584e-15	1.66423e-14	0.000301855	0.197448	0.235413	0.566837	UP_BMP
SDC1	2	1325.22	1.57456	0.196693	8.00516	1.19315e-15	1.87883e-14	0.193818	0.0649113	0.0256244	0.715647	UP_TGF
PDGFRB	2	6600.81	1.87276	0.234116	7.99928	1.25146e-15	1.96875e-14	0.148359	0.0512305	0.010781	0.78963	UP_TGF
TBC1D4	2	1198.99	-1.37304	0.171679	-7.9977	1.26765e-15	1.99038e-14	0.194316	0.00182707	0.062747	0.74111	UP_BMP
KCTD5	2	1516.29	-1.55408	0.194338	-7.99676	1.27731e-15	2.00362e-14	0.214146	0.0272159	0.0822475	0.676391	UP_BMP
SPHK1	2	654.142	-2.09152	0.262357	-7.97202	1.561e-15	2.43224e-14	0.193355	0.0524655	0.136073	0.618107	UP_BMP
MPZL2	2	192.539	1.88865	0.236994	7.9692	1.59706e-15	2.48604e-14	0.0434037	0.251652	0.124752	0.580192	UP_TGF
PRR14	2	517.412	1.29517	0.162621	7.96434	1.66111e-15	2.57836e-14	0.0921904	0.102408	0.252442	0.55296	UP_TGF
UCHL1	2	1584.75	1.43589	0.180317	7.96319	1.6766e-15	2.59992e-14	0.000930206	0.21472	0.277853	0.506497	UP_TGF
ETV5	2	278.052	1.7338	0.219573	7.89623	2.87467e-15	4.39094e-14	0.21861	0.15888	0.0452901	0.577219	UP_TGF
EMP1	2	4741.63	1.68418	0.2133	7.89581	2.88435e-15	4.4016e-14	0.0994307	0.357217	0.266927	0.276425	UP_TGF
MCC	2	864.257	-1.13206	0.143477	-7.89016	3.01797e-15	4.59261e-14	0.0403244	0.383483	0.1004	0.475793	UP_BMP
CNN3	2	5534.15	1.27297	0.161712	7.87184	3.49449e-15	5.29305e-14	0.140255	0.0339662	0.0150568	0.810722	UP_TGF
FOLR1	2	81.8672	-4.46209	0.567335	-7.86501	3.69071e-15	5.57988e-14	0.215027	0.0419459	0.0181121	0.724915	UP_BMP
ANKRD6	2	2831.24	-1.39679	0.177953	-7.8492	4.18704e-15	6.30687e-14	0.042881	0.132611	0.206947	0.61756	UP_BMP
KIAA1549	2	1347.77	1.57351	0.200578	7.84486	4.3342e-15	6.52251e-14	0.263606	0.0556367	0.0097109	0.671047	UP_TGF
PALLD	2	9096.14	0.967915	0.123464	7.83967	4.5172e-15	6.77913e-14	0.146773	0.0702629	0.0156918	0.767273	UP_TGF
FAM234B	2	446.373	-1.54515	0.197769	-7.81288	5.58971e-15	8.33495e-14	0.113627	0.18413	0.0578645	0.644379	UP_BMP
CLU	2	2534.27	1.79061	0.229334	7.80788	5.81569e-15	8.65608e-14	0.2757	0.00455813	0.126373	0.593369	UP_TGF
TNFAIP8	2	485.748	-1.2206	0.156398	-7.80446	5.9759e-15	8.88643e-14	0.0167547	0.0478979	0.16529	0.770058	UP_BMP
THNSL2	2	433.201	-1.60389	0.205954	-7.78762	6.82807e-15	1.01075e-13	0.246211	0.0293867	0.216662	0.50774	UP_BMP
FLNB	2	8338.96	-1.15532	0.14876	-7.76632	8.07999e-15	1.19282e-13	0.2832	0.164965	0.0160451	0.53579	UP_BMP
VAV3	2	101.193	-3.24001	0.417599	-7.75867	8.58264e-15	1.26588e-13	0.177486	0.00734725	0.0074306	0.807736	UP_BMP
RAP2C	2	2256.79	-1.21034	0.156063	-7.75548	8.80094e-15	1.29456e-13	0.241977	0.0100149	0.0231159	0.724892	UP_BMP
PCOLCE-AS1	2	63.0217	3.88057	0.500781	7.74905	9.25843e-15	1.35574e-13	0.0200366	0.0101449	0.0269916	0.942827	UP_TGF
CEP85L	2	327.209	-1.47155	0.190363	-7.73024	1.07347e-14	1.56489e-13	0.094564	0.145262	0.236172	0.524002	UP_BMP
PLEKHO1	2	630.308	1.66376	0.21524	7.7298	1.07717e-14	1.56887e-13	0.0981432	0.0448149	0.284944	0.572098	UP_TGF
LURAP1L	2	333.26	1.7954	0.232367	7.72657	1.10482e-14	1.60341e-13	0.0333981	0.163428	0.482487	0.320687	UP_TGF
CLTCL1	2	2594.52	-2.29619	0.29751	-7.71802	1.18153e-14	1.71017e-13	0.208912	0.0425305	0.0701348	0.678423	UP_BMP
CNTN6	2	54.2705	-4.89778	0.635712	-7.7044	1.31458e-14	1.89267e-13	0.0815462	0.435523	0.287152	0.195778	UP_BMP
TINAGL1	2	246.571	-2.3676	0.308243	-7.68095	1.57911e-14	2.26353e-13	0.202077	0.028787	0.0485116	0.720624	UP_BMP
LSR	2	100.099	-3.10544	0.405925	-7.65026	2.00569e-14	2.85242e-13	0.152	0.236175	0.115737	0.496088	UP_BMP
CD82	2	472.774	1.45031	0.189855	7.63905	2.18827e-14	3.09587e-13	0.347042	0.0419957	0.0186726	0.59229	UP_TGF
GYG2	2	3442.75	-1.68482	0.220779	-7.63127	2.32454e-14	3.28295e-13	0.252895	0.0060914	0.0968889	0.644125	UP_BMP
SCNN1G	2	83.768	-4.6379	0.607908	-7.62928	2.3606e-14	3.32811e-13	0.0991407	0.0364577	0.032647	0.831755	UP_BMP
KANK2	2	2356.45	1.15683	0.151884	7.61656	2.60528e-14	3.66357e-13	0.182318	0.144898	0.0427942	0.629991	UP_TGF
MAN2C1	2	2529.19	1.12778	0.148154	7.61224	2.69381e-14	3.77829e-13	0.0863484	0.226757	0.310012	0.376883	UP_TGF
MSANTD2	2	450.351	1.43253	0.188518	7.5989	2.98651e-14	4.18163e-13	0.216748	0.188021	0.0264473	0.568784	UP_TGF
SFRP1	2	1310.5	2.25171	0.296573	7.59244	3.13933e-14	4.38055e-13	0.101545	0.439144	0.00971903	0.449592	UP_TGF
MAFA	2	392.838	-7.62774	1.00567	-7.58473	3.33181e-14	4.63722e-13	0.300175	0.134288	0.0478133	0.517724	UP_BMP
DKK1	2	154.738	-2.69831	0.35581	-7.58356	3.36205e-14	4.66735e-13	0.126581	0.0983369	0.138358	0.636725	UP_BMP
TSC22D2	2	1415.05	-1.10331	0.145548	-7.58039	3.44527e-14	4.77069e-13	0.260797	0.0468509	0.104887	0.587465	UP_BMP
SLC22A4	2	138.727	2.2401	0.295807	7.57282	3.65199e-14	5.04836e-13	0.282705	0.0744622	0.0145376	0.628295	UP_TGF
EPHB2	2	517.614	1.68618	0.222857	7.56621	3.84281e-14	5.29866e-13	0.256523	0.16324	0.0270471	0.55319	UP_TGF
POLE	2	2211.06	1.47938	0.195525	7.56622	3.84255e-14	5.29866e-13	0.0624117	0.0876924	0.10675	0.743146	UP_TGF
ALPK1	2	575.41	-1.5752	0.208353	-7.56025	4.02307e-14	5.53783e-13	0.160713	0.109242	0.0134967	0.716548	UP_BMP
DTX3	2	1111.28	1.41301	0.187046	7.55435	4.20964e-14	5.78001e-13	0.114793	0.0564399	0.313512	0.515255	UP_TGF
DGKI	2	204.403	2.41934	0.320499	7.54865	4.39799e-14	6.03353e-13	0.0740823	0.00455551	0.204652	0.716711	UP_TGF
NDP	2	97.9755	3.54941	0.470758	7.53978	4.70763e-14	6.43126e-13	0.00880681	0.446962	0.0853281	0.458903	UP_TGF
INTS6	2	1196.32	-1.13457	0.150904	-7.51846	5.54242e-14	7.53381e-13	0.105723	0.0239397	0.0162754	0.854062	UP_BMP
MYBL1	2	219.19	2.11331	0.281377	7.51059	5.88605e-14	7.98094e-13	0.085162	0.0123035	0.0280759	0.874459	UP_TGF
TRIB2	2	664.162	1.5136	0.202047	7.49133	6.8179e-14	9.19092e-13	0.2594	0.256295	0.0151937	0.469111	UP_TGF
SOCS3	2	369.292	2.12607	0.284098	7.48358	7.23239e-14	9.74162e-13	0.104565	0.00092981	0.0302354	0.86427	UP_TGF
HEXB	2	2342.66	1.17576	0.157375	7.47105	7.95591e-14	1.06896e-12	0.201674	0.0987149	0.0257962	0.673815	UP_TGF
SPINK5	2	3464.38	-5.63004	0.75371	-7.46977	8.03375e-14	1.07853e-12	0.0182817	0.0973331	0.0134767	0.870909	UP_BMP
CYFIP2	2	193.289	1.72289	0.23128	7.44935	9.37979e-14	1.2551e-12	0.040424	0.00590619	0.126831	0.826839	UP_TGF
CDH13	2	465.203	1.37694	0.184852	7.44888	9.41332e-14	1.25856e-12	0.261556	0.0667069	0.0776243	0.594113	UP_TGF
PM20D2	2	708.17	1.5462	0.208141	7.42862	1.09739e-13	1.46361e-12	0.041182	0.19645	0.0304141	0.731954	UP_TGF
EGR2	2	60.0437	4.05733	0.547276	7.41368	1.22846e-13	1.6344e-12	0.0424802	0.228018	0.00709077	0.722411	UP_TGF
DNM1	2	2881.59	2.37475	0.320687	7.4052	1.30952e-13	1.73942e-12	0.0516448	0.18663	0.144536	0.617189	UP_TGF
ATG16L1	2	709.366	-1.15441	0.155901	-7.40478	1.3137e-13	1.74354e-12	0.039203	0.0533348	0.0110703	0.896392	UP_BMP
UCK2	2	603.406	1.46016	0.198223	7.36625	1.75498e-13	2.3104e-12	0.0855798	0.0434035	0.120279	0.750738	UP_TGF
ELK3	2	4019.44	0.884292	0.1203	7.35073	1.97127e-13	2.58887e-12	0.0834041	0.0364616	0.00906013	0.871074	UP_TGF
WFIKKN2	2	108.519	-2.57604	0.350456	-7.35054	1.97407e-13	2.59045e-12	0.0231566	0.11753	0.0693866	0.789927	UP_BMP
OLFML3	2	3566.49	1.31815	0.179606	7.33908	2.15062e-13	2.81081e-12	0.00862748	0.19941	0.420042	0.37192	UP_TGF
AKAP6	2	292.344	-1.47318	0.200737	-7.33886	2.15414e-13	2.81316e-12	0.043395	0.228789	0.0915357	0.63628	UP_BMP
KCNN3	2	64.1135	3.49824	0.477638	7.32403	2.40627e-13	3.12489e-12	0.0968848	0.0177244	0.0383203	0.847071	UP_TGF
HSD17B4	2	4924.86	-1.40372	0.191777	-7.31954	2.48817e-13	3.22868e-12	0.15599	0.410688	0.112463	0.320859	UP_BMP
NUDT16L1	2	654.616	-1.51045	0.206708	-7.30717	2.72824e-13	3.52616e-12	0.081854	0.0252653	0.0712009	0.82168	UP_BMP
ASB13	2	850.698	-1.19913	0.164384	-7.29469	2.99355e-13	3.85988e-12	0.204907	0.155726	0.000438656	0.638928	UP_BMP
RBP1	2	202.736	2.86603	0.392929	7.29402	3.00837e-13	3.86981e-12	0.261174	0.189899	0.0356832	0.513243	UP_TGF
TEX14	2	62.3358	-2.86762	0.393524	-7.28702	3.16891e-13	4.06668e-12	0.154195	0.107402	0.119547	0.618856	UP_BMP
CELF4	2	76.8791	-2.34154	0.321395	-7.28555	3.20355e-13	4.10467e-12	0.233541	0.0585106	0.184206	0.523742	UP_BMP
ZBTB16	2	2319.35	-0.93145	0.12789	-7.28324	3.25905e-13	4.17251e-12	0.0396452	0.00316301	0.220776	0.736416	UP_BMP
ANKRD28	2	2444.16	-1.39905	0.192096	-7.28306	3.26344e-13	4.17484e-12	0.238741	0.376656	0.0241018	0.360501	UP_BMP
SPATS2L	2	6634.43	1.195	0.164535	7.26292	3.78826e-13	4.83486e-12	0.158026	0.343337	0.062928	0.435709	UP_TGF
ARHGAP20	2	119.817	-2.82888	0.389833	-7.25665	3.96806e-13	5.05641e-12	0.107441	0.192724	0.362555	0.337279	UP_BMP
TMEM255B	2	52.5636	4.20575	0.580166	7.24921	4.19206e-13	5.32105e-12	0.1064	0.107495	0.384108	0.401998	UP_TGF
SLC6A6	2	1502.05	1.63276	0.225447	7.24233	4.41042e-13	5.58082e-12	0.15828	0.150044	0.133861	0.557816	UP_TGF
CCDC186	2	1140.89	-1.08959	0.150518	-7.2389	4.52332e-13	5.71481e-12	0.221458	0.178799	0.02411	0.575633	UP_BMP
HRH1	2	404.424	2.15875	0.298626	7.22895	4.86729e-13	6.13819e-12	0.0541726	0.128197	0.0278946	0.789736	UP_TGF
GBAP1	2	367.122	1.74982	0.242444	7.21742	5.2984e-13	6.64768e-12	0.161156	0.000861665	0.233174	0.604808	UP_TGF
TAGLN2	2	1299.12	1.73683	0.241721	7.18529	6.70635e-13	8.37549e-12	0.137184	0.116691	0.0982597	0.647865	UP_TGF
SLC27A2	2	370.342	-5.40693	0.754246	-7.16866	7.57371e-13	9.40109e-12	0.0755561	0.0415588	0.0125779	0.870307	UP_BMP
SNX24	2	351.482	-1.79224	0.250022	-7.16833	7.59158e-13	9.4161e-12	0.135046	0.169135	0.037565	0.658255	UP_BMP
CACNA1C	2	937.681	1.92035	0.268532	7.15129	8.59649e-13	1.06382e-11	0.362795	0.0231612	0.0202983	0.593746	UP_TGF
KLF7	2	929.082	1.1275	0.158253	7.12468	1.04322e-12	1.28514e-11	0.152059	0.186698	0.0465683	0.614675	UP_TGF
PAQR3	2	338.403	-1.54304	0.216878	-7.11478	1.12089e-12	1.37769e-11	0.134086	0.120341	0.0242164	0.721357	UP_BMP
TREX2	2	57.5735	2.71943	0.382437	7.11078	1.15386e-12	1.41715e-11	0.0948131	0.234873	0.129629	0.540685	UP_TGF
TBC1D8B	2	5286.26	-1.0646	0.149947	-7.09985	1.24896e-12	1.52935e-11	0.142882	0.381285	0.245849	0.229984	UP_BMP
LUC7L	2	1773.57	1.09967	0.155226	7.08434	1.39705e-12	1.703e-11	0.356076	0.000227859	0.0373111	0.606385	UP_TGF
FMNL3	2	4496.24	1.33598	0.188671	7.08102	1.43093e-12	1.743e-11	0.033417	0.289701	0.163036	0.513846	UP_TGF
NHSL1	2	281.28	-2.06158	0.291316	-7.07676	1.47561e-12	1.79237e-11	0.000681286	0.45655	0.00765202	0.535117	UP_BMP
RGS9	2	74.7648	2.6446	0.374164	7.06803	1.57154e-12	1.90431e-11	0.0649583	0.449164	0.00245883	0.483419	UP_TGF
HSD3B7	2	194.145	1.90006	0.269589	7.04798	1.81538e-12	2.19651e-11	0.0958797	0.0170102	0.234058	0.653052	UP_TGF
GLT1D1	2	71.0737	-3.27301	0.465658	-7.02879	2.08332e-12	2.50213e-11	0.1924	0.0112575	0.0315648	0.764777	UP_BMP
ING1	2	450.444	1.37668	0.196055	7.02191	2.18861e-12	2.62473e-11	0.00718897	0.132579	0.130781	0.729451	UP_TGF
CERS6	2	3146.35	-1.15027	0.164138	-7.00797	2.41807e-12	2.88716e-11	0.135421	0.1451	0.17911	0.540368	UP_BMP
SGIP1	2	132.944	1.79819	0.256904	6.99947	2.56937e-12	3.05885e-11	0.0531186	0.102354	0.162513	0.682014	UP_TGF
PGBD5	2	135.265	-2.23269	0.31927	-6.9931	2.68868e-12	3.19389e-11	0.131102	0.334585	0.168074	0.366239	UP_BMP
FXYD2	2	49.3996	3.61581	0.518273	6.97665	3.02311e-12	3.57293e-11	0.0363724	0.00130116	0.0191848	0.943142	UP_TGF
GLI2	2	859.179	1.96243	0.281313	6.97598	3.03754e-12	3.58738e-11	0.115473	0.038275	0.107872	0.738381	UP_TGF
CCDC102A	2	363.473	1.53723	0.220604	6.96826	3.20876e-12	3.77592e-11	0.169743	0.193095	0.082186	0.554975	UP_TGF
GPR161	2	304.99	1.75117	0.251393	6.96586	3.26409e-12	3.83548e-11	0.00872313	0.111155	0.00758378	0.872538	UP_TGF
IL1RAP	2	717.137	1.42359	0.20478	6.95182	3.6061e-12	4.21911e-11	0.217194	0.165181	0.0881468	0.529478	UP_TGF
ANO1	2	213.037	2.80313	0.403668	6.94413	3.8079e-12	4.43928e-11	0.0373625	0.121206	0.000231047	0.841201	UP_TGF
IMPDH1	2	3643.02	-1.35697	0.195624	-6.93662	4.01586e-12	4.6717e-11	0.195697	0.140182	0.0151689	0.648952	UP_BMP
SLC6A8	2	4535.99	-1.57011	0.226515	-6.93159	4.1615e-12	4.82734e-11	0.029344	0.13515	0.250825	0.584682	UP_BMP
PARP15	2	468.251	-1.76437	0.255154	-6.9149	4.6818e-12	5.40397e-11	0.10294	0.188797	0.00861256	0.699651	UP_BMP
P2RX1	2	85.3849	3.47198	0.502148	6.91425	4.70332e-12	5.42496e-11	0.120064	0.227322	0.0139188	0.638695	UP_TGF
CCDC180	2	615.375	1.61825	0.234323	6.90607	4.98275e-12	5.72699e-11	0.173326	0.0927085	0.211584	0.522381	UP_TGF
MYO1E	2	3410.72	-1.21964	0.176658	-6.90393	5.05843e-12	5.80989e-11	0.236186	0.201088	0.0117597	0.550966	UP_BMP
MCUB	2	276.609	5.42907	0.787698	6.89233	5.48861e-12	6.28184e-11	0.028746	0.195637	0.00926219	0.766354	UP_TGF
MCF2	2	52.0618	-4.65544	0.675865	-6.88812	5.65345e-12	6.46142e-11	0.0704273	0.0178584	0.216063	0.695651	UP_BMP
CYTH2	2	1593.6	1.03138	0.150032	6.87437	6.22632e-12	7.09627e-11	4.07657e-05	0.234075	0.277574	0.48831	UP_TGF
COX7A2L	2	3024.88	-0.860865	0.125289	-6.87101	6.3748e-12	7.26041e-11	0.0118183	0.447314	0.0117084	0.52916	UP_BMP
KLF2	2	2830.05	-1.11134	0.161844	-6.8667	6.57044e-12	7.47278e-11	0.184414	0.332892	0.222909	0.259786	UP_BMP
HEYL	2	603.119	2.16034	0.314985	6.85854	6.95696e-12	7.8794e-11	0.240802	0.00632576	0.00701419	0.745858	UP_TGF
TMEM132A	2	269.539	2.21108	0.32258	6.85438	7.16222e-12	8.10061e-11	0.018291	0.144343	0.181627	0.655739	UP_TGF
EFHD2	2	996.983	-1.28463	0.187426	-6.85405	7.17886e-12	8.11381e-11	0.00398263	0.116093	0.0660106	0.813914	UP_BMP
MYRIP	2	67.7882	3.54239	0.516893	6.85323	7.21999e-12	8.15464e-11	0.0810379	0.0221725	0.283991	0.612799	UP_TGF
COL16A1	2	14837.8	2.31716	0.338616	6.84302	7.75419e-12	8.72977e-11	0.0710002	0.312674	0.212776	0.40355	UP_TGF
PIANP	2	193.763	2.95363	0.431813	6.84007	7.91546e-12	8.90311e-11	0.0903139	0.100056	0.0648325	0.744798	UP_TGF
ADCY6	2	2516.83	1.05361	0.154245	6.83079	8.4448e-12	9.45284e-11	0.0597183	0.395475	0.302071	0.242735	UP_TGF
PARD3	2	1226.19	-1.01064	0.147964	-6.83035	8.471e-12	9.46917e-11	0.0585377	0.247029	0.00736946	0.687063	UP_BMP
FGF1	2	640.124	5.53081	0.810982	6.81989	9.11084e-12	1.01496e-10	0.19914	0.0256215	0.0665346	0.708704	UP_TGF
CRACR2A	2	132.71	-2.15655	0.316694	-6.80958	9.78818e-12	1.08744e-10	0.0422027	0.00281382	0.0384775	0.916506	UP_BMP
A2M	2	6561.4	-4.7082	0.691705	-6.80666	9.98909e-12	1.10812e-10	0.252333	0.0249528	0.0296698	0.693044	UP_BMP
RHBDL2	2	179.155	-2.15541	0.316852	-6.80258	1.02763e-11	1.13857e-10	0.114217	0.00236697	0.0714771	0.811939	UP_BMP
EBF4	2	385.864	2.06982	0.304283	6.80228	1.02976e-11	1.14015e-10	0.0234681	0.186574	0.0929657	0.696992	UP_TGF
GAS2	2	723.08	2.42198	0.357367	6.77729	1.22448e-11	1.34659e-10	0.0100306	0.439196	0.303081	0.247693	UP_TGF
ACTA2	2	2333.48	-2.05911	0.304587	-6.76032	1.37692e-11	1.50915e-10	0.261829	0.353315	0.0476644	0.337192	UP_BMP
PPOX	2	334.035	1.41136	0.208877	6.75692	1.40959e-11	1.54081e-10	0.0208013	0.139815	0.281637	0.557746	UP_TGF
PDZRN3	2	728.251	1.80934	0.268315	6.74334	1.54787e-11	1.68518e-10	0.180765	0.317589	0.0687728	0.432873	UP_TGF
CALD1	2	22317.8	-1.03129	0.15294	-6.7431	1.55046e-11	1.68688e-10	0.318057	0.145219	0.0191186	0.517605	UP_BMP
BARX2	2	165.691	2.40136	0.357252	6.72177	1.79532e-11	1.94419e-10	0.0195951	0.0164412	0.0164839	0.94748	UP_TGF
CCDC106	2	271.167	1.23563	0.183931	6.71788	1.84381e-11	1.99406e-10	0.0299567	0.421155	0.0022505	0.546637	UP_TGF
GNG12	2	2450.56	0.821333	0.122304	6.71551	1.87411e-11	2.02548e-10	0.155958	0.0304113	0.0980836	0.715547	UP_TGF
GPC4	2	12207.8	-0.887851	0.132259	-6.71297	1.90698e-11	2.05827e-10	0.25625	0.0912052	0.00692532	0.64562	UP_BMP
F2R	2	3501.02	-1.11871	0.166663	-6.71243	1.91413e-11	2.06353e-10	0.355618	0.0107948	0.0187265	0.614861	UP_BMP
COLGALT1	2	11985.6	-0.919276	0.137075	-6.70638	1.99515e-11	2.14633e-10	0.00571103	0.0107421	0.0993378	0.884209	UP_BMP
PKD1L1	2	103.263	-2.99032	0.446956	-6.6904	2.22559e-11	2.38951e-10	0.122743	0.115508	0.00239761	0.759351	UP_BMP
CRHBP	2	170.858	-1.79784	0.269185	-6.67885	2.40817e-11	2.57704e-10	0.0678897	0.198306	0.252615	0.48119	UP_BMP
RCN1	2	10135.6	-0.86048	0.128873	-6.67696	2.43947e-11	2.60882e-10	0.233194	0.0347861	0.0321159	0.699904	UP_BMP
TSC22D3	2	50327	-1.04122	0.156133	-6.6688	2.57905e-11	2.75088e-10	0.0701636	0.18207	0.229237	0.518529	UP_BMP
RNF213	2	6940.42	1.57936	0.237377	6.65337	2.86454e-11	3.03551e-10	0.185657	0.0570168	0.0373671	0.719959	UP_TGF
VPS37A	2	873.783	-1.16624	0.175314	-6.6523	2.88555e-11	3.05579e-10	0.233072	0.0721567	0.0698042	0.624967	UP_BMP
CES1P1	2	60.5924	-3.71288	0.559225	-6.63934	3.15098e-11	3.31963e-10	0.0988094	0.0400859	0.0640457	0.797059	UP_BMP
SEMA3D	2	410.879	-1.31663	0.198472	-6.63385	3.27037e-11	3.43652e-10	0.0301466	0.0794275	0.360061	0.530364	UP_BMP
ADARB1	2	4977.43	1.19494	0.180162	6.63262	3.29781e-11	3.46312e-10	0.133454	0.425102	0.0216184	0.419826	UP_TGF
CEP112	2	551.446	1.27492	0.192356	6.62792	3.40447e-11	3.57283e-10	0.149292	0.101544	0.163718	0.585447	UP_TGF
LMTK3	2	167.834	2.50357	0.377783	6.62701	3.42555e-11	3.59264e-10	0.173769	0.222533	0.0374541	0.566244	UP_TGF
RUNX3	2	1085.13	-4.08168	0.618156	-6.60299	4.02951e-11	4.20711e-10	0.14401	0.0469381	0.111704	0.697347	UP_BMP
MKNK2	2	1897.87	-1.05233	0.159594	-6.59382	4.28642e-11	4.4639e-10	0.351011	0.00318916	0.0225263	0.623274	UP_BMP
ARID5A	2	273.896	1.62483	0.246476	6.59225	4.33215e-11	4.50368e-10	0.00728394	0.126212	0.111328	0.755176	UP_TGF
PPP1R1C	2	64.9325	-2.68337	0.407921	-6.57817	4.76283e-11	4.94109e-10	0.244558	0.0421575	0.0378389	0.675446	UP_BMP
MINPP1	2	844.329	-1.23108	0.187701	-6.55874	5.42658e-11	5.61182e-10	0.0129326	0.283856	0.118917	0.584294	UP_BMP
EPHB6	2	104.948	-1.98414	0.304241	-6.5216	6.95606e-11	7.12122e-10	0.0361037	0.259117	0.217277	0.487502	UP_BMP
PCDH1	2	244.089	2.24524	0.34441	6.51908	7.07409e-11	7.23297e-10	0.0414592	0.101075	0.0816043	0.775861	UP_TGF
CDC25B	2	1514.54	1.3165	0.202175	6.51167	7.43201e-11	7.58465e-10	0.028135	0.00136468	0.226173	0.744328	UP_TGF
GSDMD	2	642.274	1.3244	0.2036	6.50492	7.77363e-11	7.92337e-10	0.0578085	0.160851	0.0436789	0.737661	UP_TGF
PTK7	2	3300.76	1.16681	0.17957	6.49777	8.15191e-11	8.2882e-10	0.227252	0.27694	0.13674	0.359068	UP_TGF
LOX	2	8705.18	1.56114	0.240652	6.4871	8.7505e-11	8.86913e-10	0.221335	0.0334519	0.127878	0.617335	UP_TGF
ATP2C1	2	3015.64	-1.00203	0.154508	-6.4853	8.85576e-11	8.97025e-10	0.210551	0.00284493	0.187294	0.59931	UP_BMP
INPP4B	2	1156.84	-1.87648	0.289951	-6.47172	9.68947e-11	9.80255e-10	0.117695	0.0281488	0.320624	0.533532	UP_BMP
FGF2	2	870.798	2.30277	0.356123	6.46623	1.00475e-10	1.01585e-09	0.152056	0.0941956	0.0292202	0.724528	UP_TGF
ACPP	2	53.6044	4.09138	0.636055	6.43243	1.25581e-10	1.26185e-09	0.222766	0.258521	0.0753188	0.443395	UP_TGF
ELF1	2	2041.04	-1.10379	0.171714	-6.42811	1.29198e-10	1.29739e-09	0.16371	0.13718	0.0175497	0.68156	UP_BMP
NFKB2	2	808.588	1.29018	0.200804	6.42506	1.31819e-10	1.32127e-09	0.158458	0.0177847	0.0225971	0.801161	UP_TGF
ISLR	2	3189.82	1.13117	0.176217	6.41917	1.37018e-10	1.3717e-09	0.0042145	0.00204567	0.100341	0.893399	UP_TGF
LCA5	2	204.306	-1.53002	0.238492	-6.41541	1.40448e-10	1.40345e-09	0.24908	0.0399962	0.0165014	0.694422	UP_BMP
RNF14	2	1258.94	-1.08572	0.169325	-6.41205	1.43578e-10	1.43385e-09	0.276371	0.00404052	0.0120334	0.707555	UP_BMP
R3HDM1	2	1493.36	-0.940512	0.146956	-6.39997	1.55411e-10	1.54444e-09	0.19015	0.0645285	0.149495	0.595827	UP_BMP
ESYT1	2	2285.45	0.918261	0.143604	6.39442	1.61161e-10	1.59964e-09	0.0701735	0.00163932	0.197877	0.73031	UP_TGF
ARHGEF25	2	849.944	1.70319	0.26651	6.39071	1.65118e-10	1.63493e-09	0.0915475	0.0177732	0.0953003	0.795379	UP_TGF
MOB3B	2	255.511	-1.68161	0.263621	-6.37889	1.78373e-10	1.75763e-09	0.0364122	0.0281866	0.0587981	0.876603	UP_BMP
PSMB2	2	2620.21	-1.04033	0.163207	-6.37432	1.8378e-10	1.80545e-09	0.30872	0.0185153	0.043153	0.629612	UP_BMP
ARHGEF28	2	560.036	1.70675	0.26787	6.37156	1.87115e-10	1.83711e-09	0.0689962	0.224401	0.0165094	0.690093	UP_TGF
COL7A1	2	2415.05	1.46705	0.230596	6.36199	1.99155e-10	1.95062e-09	0.0294758	0.156038	0.157047	0.65744	UP_TGF
PLOD2	2	12742.5	1.97648	0.311601	6.34297	2.25383e-10	2.19695e-09	0.0903404	0.117138	0.184404	0.608117	UP_TGF
RTN4RL1	2	316.055	-1.56754	0.247486	-6.33383	2.39145e-10	2.32552e-09	0.207805	0.0700537	0.00665889	0.715482	UP_BMP
HTRA3	2	411.338	1.90639	0.30109	6.33161	2.4261e-10	2.35782e-09	0.0485511	0.0885723	0.106394	0.756482	UP_TGF
ARHGAP33	2	374.522	1.67134	0.26408	6.3289	2.46911e-10	2.39676e-09	0.177182	0.0483721	0.19104	0.583406	UP_TGF
TC2N	2	150.613	-2.77674	0.438965	-6.32566	2.5216e-10	2.44189e-09	0.0567873	0.363114	0.248288	0.33181	UP_BMP
FRMPD3	2	313.738	-1.57648	0.250019	-6.30543	2.87393e-10	2.76501e-09	0.255219	0.104024	0.101619	0.539138	UP_BMP
FHL2	2	662.246	1.20244	0.190728	6.3045	2.89127e-10	2.77833e-09	0.0213714	0.122434	0.0424629	0.813731	UP_TGF
JMJD7-PLA2G4B	2	777.496	1.85944	0.295207	6.29875	3.00052e-10	2.87154e-09	0.160854	0.330242	0.111097	0.397808	UP_TGF
TSPYL1	2	3135.21	-1.00879	0.16017	-6.29828	3.0096e-10	2.87855e-09	0.217279	0.0472144	0.0435699	0.691936	UP_BMP
NPEPL1	2	991.156	1.22878	0.196124	6.26533	3.72031e-10	3.53137e-09	0.227511	0.361423	0.0169516	0.394114	UP_TGF
OPRD1	2	73.395	2.80353	0.447754	6.26131	3.81765e-10	3.61535e-09	0.0402897	0.356369	0.0312481	0.572093	UP_TGF
MSMO1	2	6772.82	-1.73584	0.277313	-6.25951	3.86195e-10	3.65305e-09	0.163404	0.188692	0.256159	0.391746	UP_BMP
GPR173	2	473.41	2.09977	0.335778	6.25345	4.01482e-10	3.79325e-09	0.110229	0.109951	0.0521088	0.727711	UP_TGF
ATP6V0A4	2	38.2703	3.86217	0.618322	6.24621	4.20525e-10	3.96168e-09	0.312013	0.285335	0.0298863	0.372766	UP_TGF
RILPL2	2	529.808	1.05943	0.169959	6.23346	4.56237e-10	4.28574e-09	0.138494	0.29835	0.222776	0.34038	UP_TGF
CPSF2	2	1724.62	-0.850223	0.13726	-6.19423	5.85688e-10	5.44837e-09	0.159653	0.0112325	0.136883	0.692231	UP_BMP
HAUS4	2	969.992	0.885622	0.143022	6.19223	5.93197e-10	5.51193e-09	0.0232508	0.07149	0.0866038	0.818655	UP_TGF
PLXDC2	2	2665.42	1.31982	0.213282	6.18816	6.08721e-10	5.65295e-09	0.123129	0.0551371	0.0450632	0.776671	UP_TGF
SYNE4	2	203.88	-1.49349	0.242027	-6.17076	6.79638e-10	6.28289e-09	0.0965948	0.311775	0.012365	0.579265	UP_BMP
PCDH7	2	276.77	-1.29871	0.210633	-6.16576	7.01448e-10	6.4735e-09	0.050869	0.0119307	0.0813659	0.855834	UP_BMP
CHST1	2	1598.88	3.76302	0.610614	6.16269	7.15184e-10	6.5928e-09	0.0370427	0.234715	0.0342933	0.693949	UP_TGF
F10	2	72.2651	-2.60002	0.422011	-6.16104	7.22703e-10	6.65083e-09	0.138829	0.036174	0.179798	0.645199	UP_BMP
GOLM1	2	4984.48	-0.946974	0.153891	-6.15353	7.57791e-10	6.96587e-09	0.267598	0.203321	0.0288385	0.500242	UP_BMP
DSCAML1	2	195.728	3.19353	0.519168	6.15124	7.6878e-10	7.05891e-09	0.138267	0.0558598	0.000298155	0.805575	UP_TGF
STX1A	2	230.338	2.14744	0.349501	6.14431	8.03121e-10	7.3618e-09	0.287982	0.0312284	0.0800768	0.600713	UP_TGF
CKAP2L	2	253.683	1.95477	0.318247	6.14232	8.13246e-10	7.44623e-09	0.209606	0.0222556	0.11246	0.655679	UP_TGF
RDH10	2	556.536	1.0596	0.172507	6.14236	8.13061e-10	7.44623e-09	0.219755	0.0563874	0.0466688	0.677189	UP_TGF
NDST3	2	101.629	2.49168	0.40599	6.13728	8.39471e-10	7.66482e-09	0.0909759	0.0445192	0.111276	0.753229	UP_TGF
LRIG3	2	2037.58	1.44739	0.236754	6.11348	9.74788e-10	8.85075e-09	0.0804084	0.112649	0.212803	0.594139	UP_TGF
DUSP2	2	359.892	-1.33079	0.217761	-6.11123	9.88652e-10	8.96664e-09	0.127976	0.28217	0.151314	0.43854	UP_BMP
KCNH2	2	1037.43	-2.15581	0.353514	-6.09824	1.07241e-09	9.68322e-09	0.168995	0.0702164	0.205221	0.555568	UP_BMP
PCDH17	2	38.9373	-3.55481	0.583147	-6.09592	1.08813e-09	9.81967e-09	0.00579574	0.428063	0.0992425	0.466899	UP_BMP
EPSTI1	2	80.0237	-3.00433	0.493389	-6.08918	1.13488e-09	1.02133e-08	0.110815	0.0623512	0.0211422	0.805691	UP_BMP
SIPA1L3	2	827.538	0.957742	0.157511	6.08049	1.19818e-09	1.07355e-08	0.24467	0.308108	0.156392	0.29083	UP_TGF
PKN1	2	1624.44	0.893062	0.147204	6.06681	1.30476e-09	1.16584e-08	0.104808	0.0532356	0.173152	0.668804	UP_TGF
FAM102B	2	1272.61	-1.23388	0.203559	-6.06152	1.3484e-09	1.20285e-08	0.129873	0.0630093	0.010956	0.796162	UP_BMP
CKLF	2	383.259	1.05406	0.174488	6.04087	1.53285e-09	1.3607e-08	0.101208	0.113574	0.0303778	0.75484	UP_TGF
NPFF	2	194.029	1.31521	0.218512	6.01895	1.7555e-09	1.54759e-08	0.171539	0.25412	0.246365	0.327976	UP_TGF
FAM117B	2	381.526	-1.41622	0.235425	-6.0156	1.79225e-09	1.57637e-08	0.272155	0.0355302	0.014548	0.677767	UP_BMP
ISL2	2	53.7127	-3.31197	0.550884	-6.0121	1.83137e-09	1.60904e-08	0.25047	0.376086	0.0291251	0.344319	UP_BMP
RIOK3	2	1799.68	-0.846381	0.140852	-6.009	1.86671e-09	1.63832e-08	0.179618	0.0042173	0.103843	0.712322	UP_BMP
RBMS2	2	1028.2	0.949707	0.158261	6.00087	1.96259e-09	1.71877e-08	0.140978	0.183623	0.204075	0.471324	UP_TGF
MAPK7	2	846.631	1.08742	0.181321	5.99723	2.00717e-09	1.75498e-08	0.22652	0.292887	0.154904	0.325688	UP_TGF
ARAP3	2	249.712	1.65603	0.277026	5.97788	2.26059e-09	1.96706e-08	0.0310913	0.415798	0.0967888	0.456322	UP_TGF
PYCARD	2	85.9196	-2.04928	0.342882	-5.97662	2.2781e-09	1.98019e-08	0.0376588	0.182988	0.0290853	0.750268	UP_BMP
CREB1	2	1008.03	-0.84019	0.140906	-5.96276	2.4802e-09	2.14556e-08	0.0108839	0.24149	0.320241	0.427385	UP_BMP
KCTD17	2	331.514	1.18425	0.199543	5.93479	2.94226e-09	2.52384e-08	0.0639402	0.046882	0.111097	0.778081	UP_TGF
TMEM217	2	87.8665	-2.50575	0.422269	-5.93402	2.9561e-09	2.53438e-08	0.0185698	0.0973005	0.294816	0.589314	UP_BMP
TRPV4	2	6163.4	-1.29936	0.219194	-5.92793	3.06777e-09	2.62322e-08	0.0967006	0.365322	0.34253	0.195448	UP_BMP
FAM216A	2	226.777	1.25362	0.212425	5.90149	3.60233e-09	3.05309e-08	0.223279	0.366945	0.118945	0.29083	UP_TGF
RCSD1	2	303.745	1.3907	0.23593	5.89456	3.75676e-09	3.18066e-08	0.206594	0.20419	0.0247248	0.564492	UP_TGF
LHFPL1	2	50.3717	-3.89741	0.661197	-5.89447	3.75885e-09	3.18078e-08	0.18871	0.0746831	0.0910597	0.645547	UP_BMP
MT2A	2	2983.33	4.18972	0.711239	5.89074	3.84476e-09	3.2501e-08	0.118578	0.0471733	0.285812	0.548436	UP_TGF
XAGE5	2	26.3544	-4.3911	0.749408	-5.85942	4.6448e-09	3.89609e-08	0.0600683	0.254759	0.00452638	0.680646	UP_BMP
CDC42EP1	2	2280.75	-1.28082	0.218903	-5.85108	4.88398e-09	4.0821e-08	0.0632873	0.236641	0.245036	0.455036	UP_BMP
ACTC1	2	1206.33	-4.53909	0.776369	-5.84657	5.01826e-09	4.18565e-08	0.19361	0.0415497	0.0139866	0.750854	UP_BMP
BMP6	2	264.329	-1.56094	0.268726	-5.80865	6.29792e-09	5.19767e-08	0.245919	0.0996622	0.0758449	0.578574	UP_BMP
XG	2	235.012	1.44197	0.249112	5.78846	7.10366e-09	5.85315e-08	0.188844	0.190934	0.187597	0.432624	UP_TGF
PRDM6	2	219.533	-1.73352	0.299779	-5.78266	7.35307e-09	6.05254e-08	0.112649	0.378038	0.268699	0.240614	UP_BMP
ORAI2	2	2720.61	0.93582	0.162043	5.77514	7.68885e-09	6.31936e-08	0.237479	0.00186685	0.00644545	0.754209	UP_TGF
SYF2	2	735.916	0.851943	0.147575	5.77294	7.79005e-09	6.39608e-08	0.187125	0.0710743	0.116825	0.624975	UP_TGF
GATA6	2	296.94	-1.96454	0.340839	-5.76382	8.22291e-09	6.73453e-08	0.101256	0.224158	0.251223	0.423362	UP_BMP
SYDE1	2	1701.36	0.890244	0.154563	5.75974	8.42412e-09	6.87513e-08	0.327096	0.00904912	0.0150508	0.648804	UP_TGF
TGIF1	2	588.331	1.07223	0.186539	5.74803	9.02908e-09	7.33579e-08	0.0578137	0.0990539	0.0911304	0.752002	UP_TGF
MEDAG	2	95.024	2.14387	0.372984	5.74789	9.03636e-09	7.33805e-08	0.0740259	0.211545	0.0338413	0.680588	UP_TGF
CASKIN1	2	85.0006	2.34827	0.410006	5.7274	1.01981e-08	8.24447e-08	0.000711875	0.386531	0.346405	0.266352	UP_TGF
PGM2L1	2	435.153	1.22484	0.21389	5.72651	1.02516e-08	8.28363e-08	0.15846	0.0685361	0.0100416	0.762962	UP_TGF
OTUB2	2	92.6807	-1.93072	0.337372	-5.72282	1.04773e-08	8.45757e-08	0.223187	0.275319	0.212663	0.288831	UP_BMP
LVRN	2	149.506	-3.50428	0.61283	-5.71818	1.07668e-08	8.68701e-08	0.135445	0.162687	0.022124	0.679744	UP_BMP
SDC3	2	3634.85	-0.927868	0.162318	-5.71636	1.08829e-08	8.77631e-08	0.104641	0.14761	0.167192	0.580558	UP_BMP
NECTIN4	2	41.5027	-3.07315	0.53871	-5.70464	1.16592e-08	9.3745e-08	0.220289	0.00314506	0.209926	0.56664	UP_BMP
GLP2R	2	35.1139	3.19618	0.560501	5.70237	1.18154e-08	9.48137e-08	0.104187	0.164742	0.321881	0.409189	UP_TGF
NMNAT2	2	30.9977	-3.73009	0.655284	-5.69232	1.25324e-08	1.00026e-07	0.161187	0.218804	0.167769	0.45224	UP_BMP
SPACA6	2	426.893	1.22621	0.215479	5.69064	1.26567e-08	1.00968e-07	0.0196078	0.338645	0.0825093	0.559238	UP_TGF
ACAP3	2	1300.74	0.880671	0.154875	5.68633	1.29799e-08	1.03395e-07	0.0470993	0.349038	0.161969	0.441893	UP_TGF
MAP2K3	2	826.322	-0.878849	0.154841	-5.67583	1.38015e-08	1.09726e-07	0.115091	0.113606	0.252124	0.519179	UP_BMP
KDSR	2	2162.69	0.741261	0.130704	5.67131	1.41707e-08	1.12551e-07	0.0957787	0.115721	0.150114	0.638386	UP_TGF
ETFA	2	1599.42	-0.716994	0.126485	-5.66861	1.43964e-08	1.14288e-07	0.0324795	0.220295	0.0859474	0.661278	UP_BMP
LCLAT1	2	491.143	-0.99549	0.175671	-5.66679	1.45498e-08	1.15337e-07	0.211105	0.132688	0.0773933	0.578814	UP_BMP
TUBA1C	2	4988.31	-1.16444	0.205754	-5.65937	1.51927e-08	1.19966e-07	0.144976	0.0325817	0.0154135	0.807028	UP_BMP
WDR26	2	3716.43	-0.771174	0.136595	-5.6457	1.64515e-08	1.2953e-07	0.29423	0.118436	0.0611981	0.526136	UP_BMP
UNC13B	2	1686.02	-1.30658	0.231832	-5.6359	1.74148e-08	1.36784e-07	0.117151	0.429162	0.036316	0.417371	UP_BMP
PKP4	2	1763.53	-0.888657	0.157787	-5.63201	1.78116e-08	1.39833e-07	0.00512934	0.186737	0.00513022	0.803003	UP_BMP
ERCC3	2	1281.83	0.835019	0.148588	5.6197	1.91291e-08	1.496e-07	0.0418722	0.0619882	0.162545	0.733595	UP_TGF
FAM49B	2	618.53	-0.875928	0.155918	-5.61786	1.93332e-08	1.51123e-07	0.214029	0.403075	0.210697	0.172199	UP_BMP
NSMCE4A	2	336.356	1.27366	0.226739	5.61732	1.93942e-08	1.51528e-07	0.23538	0.0678739	0.00799117	0.688755	UP_TGF
NIPAL2	2	693.465	-1.86982	0.334035	-5.59767	2.17251e-08	1.68527e-07	0.141821	0.270559	0.0147017	0.572917	UP_BMP
CDC5L	2	1765.69	-0.736942	0.131872	-5.58832	2.2927e-08	1.77176e-07	0.192514	0.386468	0.0340613	0.386957	UP_BMP
PBDC1	2	459.566	-1.38588	0.249345	-5.55808	2.72757e-08	2.08313e-07	0.115745	0.174733	0.288265	0.421256	UP_BMP
NUP54	2	673.336	0.797279	0.143745	5.54647	2.91497e-08	2.2169e-07	0.0276135	0.0136413	0.00762052	0.951125	UP_TGF
ADCY3	2	1907.95	1.01881	0.18382	5.54243	2.9831e-08	2.26344e-07	0.198329	0.11521	0.0295215	0.656939	UP_TGF
PIEZO2	2	306.528	1.60226	0.289121	5.54185	2.99292e-08	2.26983e-07	0.18771	0.0233214	0.178293	0.610676	UP_TGF
CAPN6	2	175442	-1.18936	0.214934	-5.5336	3.13729e-08	2.37334e-07	0.235672	0.278569	0.159248	0.326511	UP_BMP
LEF1	2	332.515	1.48248	0.268439	5.5226	3.34016e-08	2.5133e-07	0.199109	0.277226	0.149586	0.37408	UP_TGF
DSCC1	2	113.476	1.62143	0.293707	5.52059	3.37861e-08	2.53988e-07	0.147694	0.00668046	0.120484	0.725142	UP_TGF
ZNF525	2	418.263	-1.03291	0.187562	-5.50704	3.64918e-08	2.72697e-07	0.0790951	0.0715451	0.0200804	0.829279	UP_BMP
C7	2	58.8926	-2.29681	0.417172	-5.50568	3.67736e-08	2.74422e-07	0.140355	0.112556	0.161644	0.585445	UP_BMP
EMILIN3	2	928.897	1.62067	0.294692	5.49954	3.80773e-08	2.83501e-07	0.0786075	0.212867	0.0124725	0.696053	UP_TGF
MYBPC1	2	249.021	-2.72676	0.496083	-5.49659	3.87201e-08	2.88155e-07	0.00118583	0.0242712	0.158319	0.816224	UP_BMP
MCL1	2	4274.01	0.794352	0.144562	5.49489	3.90946e-08	2.90809e-07	0.224852	0.26713	0.106411	0.401606	UP_TGF
SLC41A3	2	1763.09	0.972674	0.177184	5.48961	4.02818e-08	2.98958e-07	0.0652708	0.24712	0.0869701	0.60064	UP_TGF
AEBP2	2	847.308	0.949683	0.173123	5.48558	4.12116e-08	3.05581e-07	0.220183	0.255685	0.178845	0.345286	UP_TGF
MERTK	2	605.004	1.671	0.304645	5.48509	4.13253e-08	3.06146e-07	0.0078888	0.209262	0.128314	0.654536	UP_TGF
NOP53	2	5217.01	0.778528	0.14213	5.47756	4.31223e-08	3.18878e-07	0.016359	0.205359	0.413543	0.364739	UP_TGF
PLPP1	2	1351.2	0.687588	0.125866	5.46287	4.68505e-08	3.44049e-07	0.163702	0.204649	0.0158406	0.615808	UP_TGF
MECOM	2	473.101	1.66	0.304283	5.45544	4.8852e-08	3.57678e-07	0.109767	0.102819	0.0051428	0.782271	UP_TGF
PXK	2	941.775	0.838847	0.153795	5.45432	4.91616e-08	3.59782e-07	0.0854205	0.180487	0.0686319	0.66546	UP_TGF
ERF	2	3522	1.03463	0.18979	5.45148	4.99532e-08	3.64594e-07	0.130581	0.346845	0.0258431	0.496731	UP_TGF
BCL7A	2	497.78	-1.18479	0.217484	-5.44773	5.10177e-08	3.71864e-07	0.151569	0.169653	0.0676122	0.611166	UP_BMP
RELB	2	97.2132	1.6784	0.308149	5.44671	5.13091e-08	3.7382e-07	0.190047	0.38819	0.129196	0.292567	UP_TGF
RASGEF1B	2	236.973	1.42172	0.261085	5.44542	5.16836e-08	3.7638e-07	0.0862542	0.330395	0.0407617	0.542589	UP_TGF
EHHADH	2	258.302	-1.3021	0.239435	-5.43822	5.38157e-08	3.91383e-07	0.131243	0.0689617	0.147366	0.65243	UP_BMP
TGM2	2	2812.22	1.86117	0.342704	5.43085	5.60872e-08	4.06995e-07	0.146632	0.172515	0.326593	0.35426	UP_TGF
TPBG	2	1320.7	1.53805	0.283274	5.42957	5.64894e-08	4.09731e-07	0.115635	0.192706	0.0167104	0.674949	UP_TGF
LPIN1	2	3704.03	-0.940195	0.173557	-5.41721	6.05378e-08	4.36762e-07	0.00906633	0.129342	0.438964	0.422627	UP_BMP
CYTH1	2	1370.76	1.07013	0.1978	5.4102	6.29554e-08	4.53201e-07	0.250904	0.0187337	0.055697	0.674665	UP_TGF
ZNF385A	2	652.532	1.34788	0.251245	5.36479	8.10435e-08	5.77041e-07	0.31213	0.029791	0.086436	0.571643	UP_TGF
SMC4	2	1167.51	1.15273	0.214951	5.36277	8.1954e-08	5.82506e-07	0.10845	0.125039	0.24689	0.519621	UP_TGF
PLAU	2	235.064	1.99891	0.372962	5.35956	8.34267e-08	5.92457e-07	0.274605	0.271303	0.178137	0.275954	UP_TGF
SRRM2	2	28804.2	0.997229	0.186093	5.35877	8.37905e-08	5.94522e-07	0.0588689	0.0485861	0.26798	0.624566	UP_TGF
ARPC1A	2	2063.88	-0.894268	0.167053	-5.35321	8.6409e-08	6.12302e-07	0.150949	0.091981	0.128077	0.628993	UP_BMP
SYNC	2	683.137	0.807172	0.151257	5.33641	9.4805e-08	6.68599e-07	0.03463	0.0603059	0.201996	0.703068	UP_TGF
HMGA2	2	238.081	1.72499	0.324221	5.32043	1.03524e-07	7.27255e-07	0.025441	0.182614	0.0480403	0.743904	UP_TGF
GDF7	2	93.626	1.75516	0.330202	5.31542	1.06412e-07	7.45293e-07	0.175188	0.116586	0.0535475	0.654678	UP_TGF
TFEB	2	207.465	1.69984	0.320067	5.31089	1.09092e-07	7.63408e-07	0.161296	0.232742	0.0391887	0.566773	UP_TGF
UNC93B1	2	278.155	-1.15171	0.2172	-5.30255	1.14197e-07	7.94356e-07	0.2376	0.201023	0.0749414	0.486435	UP_BMP
MZF1	2	382.635	1.16219	0.219545	5.29365	1.19898e-07	8.32238e-07	0.146798	0.00200736	0.348566	0.502628	UP_TGF
GYPC	2	694.311	1.07025	0.202182	5.29351	1.19991e-07	8.32531e-07	0.284639	0.0645005	0.0771703	0.57369	UP_TGF
MAP1LC3B	2	3534.45	-1.17854	0.223005	-5.2848	1.2584e-07	8.71258e-07	0.123673	0.176377	0.163676	0.536274	UP_BMP
MDFIC	2	1667.03	-0.747911	0.141758	-5.27599	1.32044e-07	9.12662e-07	0.0981281	0.160782	0.379192	0.361898	UP_BMP
CES4A	2	295.672	1.49745	0.28396	5.27345	1.33881e-07	9.23791e-07	0.138107	0.0395505	0.184697	0.637646	UP_TGF
TUBG2	2	927.459	0.861923	0.164082	5.253	1.49639e-07	1.02472e-06	0.15191	0.147671	0.0107558	0.689663	UP_TGF
NREP	2	2768	1.32926	0.253338	5.24701	1.54588e-07	1.05772e-06	0.0268388	0.0683922	0.217022	0.687747	UP_TGF
CDC42EP3	2	3262.23	-0.956669	0.182394	-5.24508	1.56211e-07	1.06748e-06	0.0430922	0.177597	0.00869593	0.770615	UP_BMP
SULF1	2	2228.22	0.987143	0.188437	5.23858	1.61817e-07	1.10486e-06	0.0648636	0.15241	0.422026	0.360701	UP_TGF
L3MBTL1	2	675.816	1.37915	0.264173	5.22064	1.78302e-07	1.20881e-06	0.16754	0.0486193	0.0740879	0.709753	UP_TGF
LTA4H	2	2776.24	0.713961	0.136821	5.21822	1.80652e-07	1.22423e-06	0.268696	0.125433	0.030684	0.575187	UP_TGF
SH3GLB2	2	904.034	0.939339	0.180754	5.19677	2.0278e-07	1.36567e-06	0.0460359	0.139514	0.0403082	0.774142	UP_TGF
CDT1	2	186.005	1.539	0.296167	5.19638	2.03203e-07	1.36795e-06	0.100944	0.13873	0.00139081	0.758935	UP_TGF
ZNF467	2	100.937	2.23021	0.430115	5.18514	2.15854e-07	1.44892e-06	0.180754	0.142379	0.230718	0.44615	UP_TGF
PRR3	2	318.274	1.03836	0.200458	5.17992	2.21981e-07	1.48577e-06	0.0147649	0.297653	0.133849	0.553732	UP_TGF
CCDC28B	2	207.152	1.26524	0.244423	5.17645	2.26153e-07	1.51183e-06	0.100132	0.385468	0.139459	0.374941	UP_TGF
PROSER2	2	469.535	1.1335	0.219036	5.17492	2.28003e-07	1.52232e-06	0.0842974	0.174134	0.335077	0.406492	UP_TGF
DAPK2	2	281.282	-1.03151	0.199566	-5.16878	2.35625e-07	1.56552e-06	0.101466	0.0655631	0.00173674	0.831234	UP_BMP
PRDM4	2	766.861	0.861434	0.167104	5.15508	2.53517e-07	1.67892e-06	0.225788	0.0451889	0.00493837	0.724085	UP_TGF
FBRS	2	1828.68	0.700687	0.136043	5.15047	2.59839e-07	1.71869e-06	0.00929411	0.0628624	0.128591	0.799253	UP_TGF
PPM1M	2	477.057	1.15627	0.224592	5.14831	2.62849e-07	1.7379e-06	0.0524863	0.0751757	0.0538231	0.818515	UP_TGF
PIWIL4	2	253.473	1.91501	0.37395	5.12103	3.03877e-07	1.99862e-06	0.195769	0.432506	0.0174328	0.354292	UP_TGF
PTPRE	2	599.299	1.64668	0.322368	5.10806	3.25483e-07	2.13126e-06	0.227195	0.145963	0.0120001	0.614843	UP_TGF
ZNF337	2	759.932	0.777021	0.152133	5.1075	3.26445e-07	2.1367e-06	0.181656	0.00794396	0.0500632	0.760337	UP_TGF
BRAF	2	659.489	-1.02786	0.201565	-5.09941	3.40714e-07	2.22563e-06	0.199883	0.04369	0.0637704	0.692656	UP_BMP
ITGB2	2	755.773	-3.63514	0.713421	-5.09536	3.4807e-07	2.27186e-06	0.274789	0.160404	0.0163267	0.548481	UP_BMP
RMND5B	2	405.855	1.03636	0.203555	5.09131	3.5559e-07	2.31631e-06	0.146602	0.111278	0.0946306	0.64749	UP_TGF
LINC01088	2	318.608	-1.51375	0.297377	-5.09034	3.57426e-07	2.32734e-06	0.150858	0.0305679	0.257703	0.560872	UP_BMP
CCDC142	2	540.77	0.904475	0.177928	5.08338	3.70773e-07	2.4048e-06	0.0131004	0.0333121	0.318866	0.634722	UP_TGF
CNST	2	1059.94	-0.870006	0.171151	-5.08327	3.70996e-07	2.40513e-06	0.194607	0.0497586	0.00613383	0.7495	UP_BMP
KIF18B	2	167.23	1.65251	0.325494	5.07694	3.83557e-07	2.4836e-06	0.215819	0.120416	0.0406913	0.623074	UP_TGF
LDLRAD2	2	215.974	1.50472	0.297273	5.06173	4.15459e-07	2.6774e-06	0.239	0.132988	0.0668873	0.561124	UP_TGF
NBEAL2	2	374.5	1.59598	0.315348	5.06103	4.16996e-07	2.68519e-06	0.00227193	0.296236	0.276696	0.424796	UP_TGF
PSMC1	2	2332.71	-0.723121	0.142988	-5.0572	4.25454e-07	2.73748e-06	0.255398	0.0500832	0.137327	0.557192	UP_BMP
KAT8	2	897.992	0.737966	0.145943	5.05653	4.26956e-07	2.74498e-06	0.0541393	0.0596507	0.287446	0.598764	UP_TGF
NFIB	2	857.609	1.13411	0.22437	5.05462	4.31243e-07	2.76927e-06	0.00993918	0.160992	0.442711	0.386358	UP_TGF
SOCS5	2	565.052	0.808827	0.160104	5.05188	4.37493e-07	2.80609e-06	0.103607	0.266899	0.182518	0.446977	UP_TGF
ACVR1C	2	27.913	-3.40325	0.675298	-5.03963	4.66428e-07	2.97878e-06	0.0608134	0.00161911	0.202969	0.734599	UP_BMP
NEXN	2	980.606	0.895721	0.177793	5.03799	4.70436e-07	3.00202e-06	0.0107036	0.244435	0.00111175	0.743749	UP_TGF
PTPRU	2	2438.43	-1.08934	0.216284	-5.03662	4.73832e-07	3.02251e-06	0.311444	0.321672	0.00167303	0.365211	UP_BMP
PRKG1	2	833.103	-0.892729	0.177722	-5.02319	5.08206e-07	3.23419e-06	0.0994516	0.147875	0.255257	0.497417	UP_BMP
DSE	2	1163.25	0.803108	0.160117	5.01575	5.28274e-07	3.35534e-06	0.102979	0.0526145	0.0845917	0.759815	UP_TGF
EIF4EBP1	2	958.345	0.785037	0.156593	5.01323	5.35237e-07	3.39692e-06	0.297566	0.0249327	0.0763286	0.601173	UP_TGF
PLD6	2	114.204	1.55157	0.30955	5.01235	5.37691e-07	3.41117e-06	0.146134	0.321309	0.0752053	0.457351	UP_TGF
RAB11FIP3	2	2370.67	0.878425	0.175465	5.00627	5.54957e-07	3.5166e-06	0.230155	0.0566327	0.209073	0.504139	UP_TGF
RTL1	2	62.1315	-2.43751	0.48703	-5.00484	5.5908e-07	3.54135e-06	0.164151	0.371829	0.0560002	0.40802	UP_BMP
CTXND1	2	52.7684	-2.40495	0.480708	-5.00293	5.64658e-07	3.5739e-06	0.128002	0.0114895	0.266792	0.593717	UP_BMP
SHC1	2	5325.09	0.673849	0.134773	4.99988	5.73664e-07	3.62668e-06	0.19281	0.172301	0.19929	0.4356	UP_TGF
BMP8B	2	166.979	-2.3045	0.46149	-4.9936	5.92626e-07	3.74365e-06	0.215465	0.212357	0.0138501	0.558328	UP_BMP
TPM4	2	11115.9	0.904483	0.181254	4.99015	6.03339e-07	3.80395e-06	0.179202	0.0188784	0.121826	0.680094	UP_TGF
AHDC1	2	2368.65	0.791711	0.158689	4.98906	6.06738e-07	3.8239e-06	0.0111856	0.072097	0.328157	0.58856	UP_TGF
USP25	2	1203.67	-0.889501	0.178317	-4.98832	6.09067e-07	3.8371e-06	0.00640287	0.152228	0.319813	0.521556	UP_BMP
MBD6	2	1216.25	0.732426	0.146858	4.98729	6.12306e-07	3.85601e-06	4.90398e-05	0.232961	0.0674008	0.699589	UP_TGF
SF3A2	2	1492.18	0.739859	0.148453	4.9838	6.23488e-07	3.92037e-06	0.0458914	0.0845039	0.090023	0.779582	UP_TGF
BLMH	2	1212.88	0.729944	0.146533	4.98142	6.31202e-07	3.96335e-06	0.027464	0.0439828	0.00137746	0.927176	UP_TGF
ARRB2	2	154.317	1.57673	0.316615	4.97998	6.35918e-07	3.99083e-06	0.228455	0.378747	0.162089	0.23071	UP_TGF
VASN	2	5309.85	0.724343	0.145655	4.97302	6.59181e-07	4.12412e-06	0.0698206	0.129146	0.0175035	0.78353	UP_TGF
MDN1	2	3044.01	-0.858478	0.172681	-4.97148	6.64433e-07	4.15379e-06	0.223017	0.0193431	0.0143921	0.743247	UP_BMP
WNT9A	2	88.3078	2.15524	0.435471	4.94922	7.45132e-07	4.63518e-06	0.232699	0.227251	0.044702	0.495348	UP_TGF
GGN	2	23.1489	3.49897	0.707279	4.94709	7.53325e-07	4.68435e-06	0.0155392	0.115177	0.343912	0.525372	UP_TGF
ABHD8	2	277.44	0.970598	0.196607	4.93673	7.94418e-07	4.92672e-06	0.1287	0.313681	0.0697716	0.487847	UP_TGF
LIMS1	2	1585.92	0.717879	0.145424	4.93647	7.9549e-07	4.93149e-06	0.0330993	0.0203775	0.0155419	0.930981	UP_TGF
TUT1	2	577.96	-0.897278	0.181876	-4.93345	8.07893e-07	5.00648e-06	0.0633682	0.175461	0.0501396	0.711032	UP_BMP
IGFBP2	2	4613.78	-1.05649	0.214518	-4.92494	8.43848e-07	5.21739e-06	0.213534	0.218926	0.0360152	0.531525	UP_BMP
AMOTL2	2	2942.44	-0.687857	0.139672	-4.92479	8.44498e-07	5.21943e-06	0.118474	0.00624169	0.19089	0.684394	UP_BMP
PXMP2	2	326.993	1.27632	0.259339	4.92142	8.59188e-07	5.29816e-06	0.179229	0.179168	0.107155	0.534448	UP_TGF
CRAMP1	2	1221.62	0.849462	0.172739	4.91759	8.76164e-07	5.39265e-06	0.237433	0.0779829	0.0559155	0.628669	UP_TGF
DUSP6	2	75.1626	2.63364	0.536619	4.90784	9.20826e-07	5.65046e-06	0.0293717	0.105815	0.068624	0.796189	UP_TGF
HOXB6	2	403.985	-5.65809	1.15333	-4.90586	9.30209e-07	5.70374e-06	0.0469032	0.0146065	0.00397428	0.934516	UP_BMP
MRI1	2	796.046	0.794717	0.161991	4.90593	9.2986e-07	5.70374e-06	0.163619	0.346737	0.128817	0.360827	UP_TGF
SPOPL	2	587.982	-0.835706	0.170733	-4.89481	9.84009e-07	6.01101e-06	0.0728123	0.128059	0.367528	0.431601	UP_BMP
SLC6A9	2	667.58	0.900767	0.184374	4.88555	1.03141e-06	6.2747e-06	0.11229	0.157437	0.31712	0.413153	UP_TGF
CTXN1	2	27.2048	2.73396	0.559776	4.88403	1.03942e-06	6.32105e-06	0.0760584	0.0347588	0.346196	0.542987	UP_TGF
LOXL1-AS1	2	213.478	1.45787	0.298727	4.88029	1.05931e-06	6.42764e-06	0.340304	0.0376435	0.0108348	0.611218	UP_TGF
SMC3	2	1268.58	0.636949	0.130561	4.87854	1.06875e-06	6.47526e-06	0.125595	0.359234	0.062319	0.452852	UP_TGF
SLC35G2	2	428.638	1.32777	0.272412	4.87412	1.09295e-06	6.61942e-06	0.240737	0.0304986	0.0111659	0.717599	UP_TGF
CLGN	2	126.362	-1.81723	0.373467	-4.86585	1.13968e-06	6.8948e-06	0.103757	0.195423	0.249882	0.450938	UP_BMP
P2RY1	2	63.5614	2.63399	0.541611	4.86325	1.15472e-06	6.98059e-06	0.0278866	0.323872	0.0148751	0.633366	UP_TGF
GMIP	2	618.437	1.05482	0.216974	4.86153	1.16484e-06	7.03915e-06	0.0945063	0.222627	0.169482	0.513384	UP_TGF
MX1	2	329.268	-1.03826	0.213815	-4.85589	1.19849e-06	7.23605e-06	0.1186	0.0359408	0.0258137	0.819645	UP_BMP
AGMAT	2	144.888	-1.33032	0.274502	-4.84632	1.25773e-06	7.56122e-06	0.256274	0.0609118	0.0819862	0.600828	UP_BMP
BCL9	2	1104.94	0.701746	0.144872	4.84389	1.27319e-06	7.64852e-06	0.0473537	0.0298084	0.369927	0.552911	UP_TGF
ERG28	2	1717.99	-0.958234	0.198402	-4.82975	1.36701e-06	8.17299e-06	0.106036	0.324974	0.00452479	0.564465	UP_BMP
HPS3	2	691.151	-0.782251	0.162308	-4.81956	1.43876e-06	8.56737e-06	0.150755	0.150868	0.272195	0.426181	UP_BMP
RASGEF1A	2	99.1211	-1.52872	0.317264	-4.81846	1.44671e-06	8.60529e-06	0.072361	0.0469611	0.0220393	0.858639	UP_BMP
ZNF43	2	255.259	1.08593	0.22545	4.81674	1.45926e-06	8.66726e-06	0.262727	0.181969	0.0540238	0.50128	UP_TGF
GLIPR1	2	562.622	2.05971	0.428115	4.8111	1.50101e-06	8.90554e-06	0.0372454	0.26173	0.035338	0.665687	UP_TGF
CUBN	2	342.119	-0.931432	0.193804	-4.80606	1.53937e-06	9.11652e-06	0.0147063	0.191912	0.0864255	0.706956	UP_BMP
WHRN	2	607.619	1.06172	0.221496	4.79341	1.63969e-06	9.67897e-06	0.00741393	0.2861	0.0664296	0.640057	UP_TGF
HSPB7	2	1252.36	1.19734	0.250033	4.78873	1.6784e-06	9.88958e-06	0.0806807	0.159687	0.236584	0.523048	UP_TGF
REEP6	2	143.343	-1.67935	0.35081	-4.78708	1.69227e-06	9.96768e-06	0.074317	0.192096	0.396277	0.337311	UP_BMP
USP2-AS1	2	60.2203	-1.84425	0.385765	-4.78078	1.7462e-06	1.02705e-05	0.15719	0.0840515	0.218909	0.53985	UP_BMP
SPTBN5	2	367.456	1.63814	0.342752	4.77939	1.75827e-06	1.03266e-05	0.0285185	0.301829	0.295209	0.374443	UP_TGF
TUBD1	2	376.191	0.914663	0.191998	4.76391	1.89873e-06	1.11075e-05	0.279478	0.00306311	0.109111	0.608347	UP_TGF
ZNF496	2	1809.68	0.760151	0.15958	4.76345	1.90314e-06	1.11253e-05	0.260326	0.00947232	0.0502851	0.679916	UP_TGF
LEF1-AS1	2	112.921	-1.57344	0.330711	-4.75775	1.95758e-06	1.14313e-05	0.152909	0.44569	0.00534505	0.396057	UP_BMP
C12orf75	2	356.303	1.22855	0.258254	4.75714	1.96356e-06	1.1458e-05	0.176973	0.29982	0.0326033	0.490604	UP_TGF
FOXP2	2	189.011	1.35612	0.285239	4.75432	1.99114e-06	1.16065e-05	0.0915007	0.0704425	0.220572	0.617485	UP_TGF
SIAH2	2	1277.13	-0.645249	0.136153	-4.73916	2.1461e-06	1.24474e-05	0.189267	0.0204641	0.0274023	0.762867	UP_BMP
SEMA5A	2	306.588	-0.90619	0.191562	-4.73053	2.23932e-06	1.29512e-05	0.0128773	0.0598195	0.0754308	0.851872	UP_BMP
FBL	2	1811.98	0.664843	0.140849	4.72027	2.35534e-06	1.35548e-05	0.0421313	0.319283	0.0932943	0.545292	UP_TGF
NR2F2	2	795.025	1.29457	0.274391	4.71798	2.382e-06	1.36841e-05	0.0606731	0.293574	0.237188	0.408565	UP_TGF
SEM1	2	1214.54	-0.751592	0.159702	-4.70623	2.52345e-06	1.44407e-05	0.204662	0.0253739	0.113628	0.656336	UP_BMP
CHM	2	1559.34	-0.716605	0.153141	-4.67937	2.87759e-06	1.63014e-05	0.233485	0.0448045	0.0783069	0.643403	UP_BMP
DDA1	2	1099.59	-0.738112	0.15782	-4.67691	2.91231e-06	1.64808e-05	0.23198	0.308897	0.13274	0.326383	UP_BMP
MCTP2	2	294.412	-1.20165	0.257146	-4.67302	2.96806e-06	1.67672e-05	0.0767481	0.173925	0.0216675	0.72766	UP_BMP
CLDN7	2	34.4254	-2.95438	0.632283	-4.67256	2.97464e-06	1.67977e-05	0.0384055	0.117106	0.00144298	0.843046	UP_BMP
DCAF15	2	443.911	1.01551	0.217561	4.66768	3.04613e-06	1.71607e-05	0.125913	0.309816	0.251626	0.312644	UP_TGF
TENM4	2	602.326	1.58504	0.33969	4.66613	3.06923e-06	1.72848e-05	0.148964	0.0197457	0.040763	0.790528	UP_TGF
PLEKHO2	2	1164.6	0.862645	0.185288	4.6557	3.22884e-06	1.81336e-05	0.0267227	0.00162138	0.0393113	0.932345	UP_TGF
WEE1	2	545.676	0.837342	0.179964	4.65283	3.27408e-06	1.8375e-05	0.144894	0.348133	0.163463	0.34351	UP_TGF
PPARA	2	1431.21	0.823187	0.177282	4.64338	3.42758e-06	1.91704e-05	0.160532	0.0631184	0.0997348	0.676615	UP_TGF
SLIRP	2	661.994	-0.870527	0.18831	-4.62285	3.78512e-06	2.10402e-05	0.122628	0.39932	0.296409	0.181643	UP_BMP
SH3D19	2	2073.35	0.699861	0.15143	4.62168	3.80646e-06	2.11444e-05	0.0385084	0.18288	0.0192191	0.759393	UP_TGF
MKRN7P	2	29.6116	-2.34669	0.507955	-4.61988	3.83958e-06	2.13211e-05	0.0861335	0.0303274	0.00870298	0.874836	UP_BMP
IKBIP	2	1166.21	0.711969	0.15413	4.61928	3.8507e-06	2.13756e-05	0.203432	0.0376645	0.0362094	0.722694	UP_TGF
MMP3	2	155.935	4.55138	0.987914	4.60706	4.08401e-06	2.25708e-05	0.0110652	0.435425	0.0315268	0.521983	UP_TGF
CUL1	2	1330.55	0.589753	0.128057	4.60539	4.11699e-06	2.27376e-05	0.181915	0.228369	0.0262095	0.563506	UP_TGF
RNF19B	2	696.813	0.999075	0.217241	4.59893	4.24657e-06	2.34136e-05	0.0501208	0.376116	0.03323	0.540533	UP_TGF
HMX1	2	27.2253	3.76474	0.819914	4.59163	4.39797e-06	2.41911e-05	0.0717969	0.168965	0.169149	0.590089	UP_TGF
JAM2	2	449.236	1.69443	0.369959	4.58004	4.64889e-06	2.5511e-05	0.0472139	0.0929725	0.0707427	0.789071	UP_TGF
PLEKHA4	2	562.984	0.884411	0.193441	4.57198	4.83129e-06	2.64496e-05	0.103874	0.130913	0.202143	0.56307	UP_TGF
USP5	2	2168.31	-0.820375	0.179547	-4.56915	4.89712e-06	2.6801e-05	0.258923	0.185763	0.0913407	0.463974	UP_BMP
TST	2	347.113	-1.14233	0.25026	-4.56456	5.00546e-06	2.73663e-05	0.17828	0.130679	0.0798263	0.611214	UP_BMP
CEACAM19	2	201.693	1.09065	0.239019	4.56303	5.042e-06	2.75476e-05	0.0730371	0.344223	0.290696	0.292044	UP_TGF
CARNS1	2	376.352	1.27911	0.280728	4.55641	5.20362e-06	2.83512e-05	0.12264	0.00103402	0.0252265	0.851099	UP_TGF
EIF4G3	2	3010.23	-0.592706	0.130108	-4.55549	5.22635e-06	2.84499e-05	0.182205	0.117035	0.037518	0.663242	UP_BMP
TAF10	2	1016.14	-0.901764	0.198122	-4.55155	5.32516e-06	2.89491e-05	0.132768	0.158932	0.286829	0.421471	UP_BMP
FBXO16	2	95.5738	-1.35432	0.298181	-4.54194	5.57384e-06	3.02304e-05	0.152517	0.181226	0.101762	0.564496	UP_BMP
FHOD1	2	714.415	1.01834	0.224228	4.54154	5.5844e-06	3.02776e-05	0.0293418	0.409898	0.317051	0.243709	UP_TGF
MPDZ	2	1855.91	0.664718	0.146497	4.53742	5.69458e-06	3.0793e-05	0.230259	0.0595724	0.0743656	0.635803	UP_TGF
SLC38A9	2	652.024	-0.877043	0.193362	-4.53577	5.73948e-06	3.1005e-05	0.157341	0.33868	0.254391	0.249589	UP_BMP
TMTC2	2	193.271	-1.09327	0.24133	-4.53017	5.89362e-06	3.18061e-05	0.0118949	0.162082	0.150526	0.675497	UP_BMP
NUP85	2	642.113	0.771908	0.170603	4.52459	6.05137e-06	3.26034e-05	0.035807	0.438687	0.207426	0.318079	UP_TGF
PHYHIP	2	46.3287	2.88732	0.638795	4.51995	6.18535e-06	3.32593e-05	0.164863	0.307784	0.01695	0.510402	UP_TGF
REC8	2	290.626	-1.79205	0.396863	-4.51553	6.3158e-06	3.39048e-05	0.135483	0.100948	0.376052	0.387516	UP_BMP
TRIM62	2	312.014	1.27085	0.281477	4.51492	6.33414e-06	3.39921e-05	0.0226712	0.25374	0.427895	0.295693	UP_TGF
EIF4E3	2	391.288	0.948432	0.210199	4.51207	6.41965e-06	3.44283e-05	0.0207208	0.0620944	0.331841	0.585344	UP_TGF
TMEM132B	2	196.133	1.96983	0.436838	4.5093	6.50416e-06	3.48471e-05	0.133173	0.134452	0.0268474	0.705528	UP_TGF
RASA4	2	901.32	1.25076	0.277759	4.50304	6.69875e-06	3.58307e-05	0.0132736	0.211338	0.0818612	0.693527	UP_TGF
MYCL	2	35.9893	-2.71651	0.603458	-4.50158	6.74514e-06	3.60434e-05	0.0159726	0.143532	0.0201864	0.820309	UP_BMP
TBC1D12	2	548.641	0.821822	0.182731	4.49743	6.87791e-06	3.67288e-05	0.0516988	0.0358326	0.105746	0.806723	UP_TGF
NTAN1	2	861.492	0.730345	0.162423	4.49655	6.90641e-06	3.68568e-05	0.308266	0.0187505	0.0798439	0.59314	UP_TGF
KLHL8	2	619.907	-0.727349	0.162108	-4.48682	7.22941e-06	3.84295e-05	0.255238	0.185051	0.0623915	0.49732	UP_BMP
ADA2	2	848.311	-0.790907	0.176541	-4.48002	7.46373e-06	3.95976e-05	0.235601	0.0156162	0.0631553	0.685627	UP_BMP
PTGIR	2	44.0025	2.7982	0.624934	4.47759	7.54909e-06	4.00114e-05	0.169894	0.0249406	0.0835333	0.721632	UP_TGF
C11orf45	2	33.0403	-2.90374	0.648564	-4.47718	7.56361e-06	4.00753e-05	0.000301741	0.223849	0.0928351	0.683014	UP_BMP
PLSCR4	2	709.438	0.89247	0.199739	4.46819	7.88852e-06	4.17019e-05	0.299368	0.259919	0.156176	0.284538	UP_TGF
RTN4R	2	79.1583	-1.55122	0.347469	-4.46434	8.03167e-06	4.23762e-05	0.114218	0.0986456	0.156307	0.63083	UP_BMP
SAP30L	2	321.387	0.802097	0.180139	4.45266	8.48128e-06	4.45752e-05	0.0754546	0.374068	0.192799	0.357679	UP_TGF
MYL6B	2	942.67	0.586786	0.131795	4.45226	8.49706e-06	4.46294e-05	0.175412	0.102549	0.0445196	0.677519	UP_TGF
LZTR1	2	2114.89	0.601412	0.135411	4.44139	8.93799e-06	4.68246e-05	0.103881	0.0012954	0.23574	0.659083	UP_TGF
USP2	2	192.133	-0.996256	0.224417	-4.43931	9.02491e-06	4.72344e-05	0.0667329	0.243689	0.0837113	0.605867	UP_BMP
MOB3C	2	356.397	0.89138	0.200805	4.43903	9.03645e-06	4.72717e-05	0.246546	0.0306741	0.136802	0.585978	UP_TGF
C20orf96	2	271.432	1.05461	0.237958	4.43192	9.33983e-06	4.87574e-05	0.259525	0.275205	0.139539	0.32573	UP_TGF
MAN2A1	2	4095.24	0.876714	0.197991	4.42805	9.50876e-06	4.95282e-05	0.111935	0.0619583	0.0638172	0.76229	UP_TGF
CTC1	2	467.114	1.06707	0.241325	4.42171	9.79234e-06	5.0859e-05	0.27215	0.0364661	0.0161916	0.675193	UP_TGF
AEN	2	553.505	-1.01813	0.230411	-4.41879	9.92572e-06	5.15189e-05	0.132085	0.0263825	0.0972596	0.744273	UP_BMP
GMPR	2	223.54	0.917705	0.207891	4.41435	1.01313e-05	5.24689e-05	0.0177183	0.370847	0.11106	0.500375	UP_TGF
SRP19	2	838.305	-0.842386	0.190953	-4.41149	1.02662e-05	5.30835e-05	0.000330928	0.430702	0.094744	0.474223	UP_BMP
EFR3B	2	190.29	1.16906	0.265283	4.40684	1.04892e-05	5.41161e-05	0.221114	0.273388	0.0643893	0.441109	UP_TGF
AIDA	2	1180.09	0.737219	0.167695	4.3962	1.10162e-05	5.66737e-05	0.0370153	0.106428	0.105873	0.750684	UP_TGF
DCXR	2	659.902	-0.942867	0.214652	-4.39254	1.12035e-05	5.75436e-05	0.189871	0.0804097	0.389972	0.339748	UP_BMP
ULBP3	2	293.103	-0.950678	0.216762	-4.38582	1.15547e-05	5.92012e-05	0.230224	0.0984303	0.0303137	0.641032	UP_BMP
DUT	2	1287.28	0.681879	0.155697	4.37953	1.18936e-05	6.08226e-05	0.020091	0.0565879	0.150222	0.7731	UP_TGF
MT1F	2	119.76	1.73115	0.395315	4.37917	1.19132e-05	6.09038e-05	0.100712	0.0230557	0.0772824	0.798949	UP_TGF
USP32	2	1675.61	-0.61569	0.140772	-4.37367	1.22178e-05	6.21878e-05	0.322958	0.0493718	0.024736	0.602934	UP_BMP
B4GALT6	2	325.887	-1.22313	0.280282	-4.36392	1.2775e-05	6.49225e-05	0.0461188	0.267793	0.136078	0.55001	UP_BMP
PRPF6	2	2624.62	0.627551	0.144236	4.35086	1.35602e-05	6.85457e-05	0.188221	0.0981243	0.196763	0.516891	UP_TGF
UBAP2	2	2314.22	0.578589	0.133363	4.33846	1.43483e-05	7.23318e-05	0.0208491	0.201205	0.0217399	0.756206	UP_TGF
ARL6IP6	2	377.327	0.994204	0.229387	4.33418	1.46307e-05	7.36644e-05	0.218574	0.0201197	0.0196342	0.741672	UP_TGF
SMIM29	2	193.468	0.906091	0.20912	4.33287	1.47178e-05	7.40799e-05	0.0699564	0.139596	0.389523	0.400925	UP_TGF
MMP17	2	830.926	-1.37088	0.316512	-4.3312	1.483e-05	7.45986e-05	0.106437	0.0709564	0.00795442	0.814652	UP_BMP
DIP2B	2	1465.07	-0.594573	0.137559	-4.32231	1.54407e-05	7.75029e-05	0.0450388	0.143197	0.361479	0.450285	UP_BMP
ZFAND3	2	2995.89	-0.66835	0.154852	-4.31606	1.58836e-05	7.96495e-05	0.136877	0.447735	0.0118899	0.403498	UP_BMP
MAP2K7	2	1107.06	0.589887	0.136813	4.31162	1.62061e-05	8.10702e-05	0.0617306	0.289073	0.0466756	0.602521	UP_TGF
NDST2	2	797.909	0.709789	0.164871	4.30511	1.66901e-05	8.31596e-05	0.174482	0.144188	0.0906774	0.590652	UP_TGF
VEGFC	2	109.702	1.86987	0.434355	4.30493	1.67035e-05	8.32012e-05	0.239391	0.103238	0.104059	0.553313	UP_TGF
CEP126	2	2545.87	-0.764117	0.177858	-4.29623	1.73731e-05	8.63779e-05	0.104282	0.104162	0.360179	0.431377	UP_BMP
PHF1	2	186.791	1.03385	0.240692	4.29533	1.74437e-05	8.67023e-05	0.122065	0.242286	0.215402	0.420247	UP_TGF
LAPTM4A	2	8779.53	0.509499	0.118792	4.28898	1.79495e-05	8.90534e-05	0.20309	0.0814663	0.0282933	0.687151	UP_TGF
TRIM7	2	85.1299	1.45828	0.340787	4.27915	1.87607e-05	9.26833e-05	0.000334467	0.0573128	0.0235652	0.918788	UP_TGF
C3orf67	2	188.973	-1.11627	0.261625	-4.26667	1.98409e-05	9.75761e-05	0.270555	0.0135973	0.209921	0.505926	UP_BMP
SERPINI1	2	229.84	-1.26116	0.295646	-4.26578	1.99209e-05	9.79105e-05	0.179261	0.235999	0.0295247	0.555215	UP_BMP
ZDHHC6	2	803.366	0.601073	0.140923	4.26524	1.99685e-05	9.80851e-05	0.00851597	0.181585	0.0302214	0.779677	UP_TGF
ZSCAN29	2	845.6	-0.779394	0.182752	-4.26475	2.00125e-05	9.82421e-05	0.34834	0.0234941	0.00276121	0.625405	UP_BMP
DHRS13	2	135.172	1.76369	0.413916	4.26098	2.03537e-05	9.97966e-05	0.153686	5.36713e-05	0.03764	0.808621	UP_TGF
PIGP	2	480.527	-0.817077	0.191799	-4.26007	2.04364e-05	0.000100142	0.120416	0.180293	0.0154234	0.683868	UP_BMP
BAIAP3	2	35.9083	-2.69323	0.632568	-4.25762	2.06612e-05	0.000101183	0.216887	0.0225758	0.217263	0.543274	UP_BMP
ALDH2	2	1860.03	-0.593958	0.139627	-4.2539	2.10082e-05	0.000102759	0.266476	0.0338495	0.097502	0.602172	UP_BMP
APOD	2	5714.73	0.555152	0.13052	4.25339	2.1056e-05	0.000102931	0.170617	0.165474	0.139264	0.524645	UP_TGF
HS3ST2	2	22.9937	-3.14653	0.740045	-4.25181	2.12048e-05	0.000103596	0.0337354	0.00827826	0.0305926	0.927394	UP_BMP
CTSB	2	8880.48	0.626418	0.147388	4.25012	2.13653e-05	0.000104293	0.0388401	0.298197	0.0850786	0.577884	UP_TGF
KPNA4	2	2116.15	-0.71488	0.168214	-4.24982	2.13947e-05	0.000104398	0.183601	0.0635749	0.14762	0.605204	UP_BMP
ABCB6	2	1234.17	0.747034	0.175845	4.24826	2.1544e-05	0.000105032	0.126691	0.00156335	0.237919	0.633827	UP_TGF
SLC25A38	2	1186.85	-0.620354	0.146227	-4.24239	2.21147e-05	0.000107558	0.13263	0.388535	0.00840327	0.470432	UP_BMP
VPS25	2	1191.44	-0.850202	0.200626	-4.23776	2.25765e-05	0.000109607	0.0691887	0.24685	0.02826	0.655701	UP_BMP
NDUFC2	2	1556.11	-0.640395	0.151414	-4.22943	2.34289e-05	0.000113361	0.093245	0.319528	0.176996	0.410231	UP_BMP
RACGAP1	2	750.864	0.873107	0.206448	4.22918	2.34546e-05	0.000113397	0.0976132	0.175689	0.222435	0.504263	UP_TGF
PRC1-AS1	2	21.7372	3.34485	0.791695	4.22492	2.39028e-05	0.000115222	0.0717724	0.0737599	0.0993125	0.755155	UP_TGF
HIVEP2	2	1061.79	1.3346	0.317191	4.20757	2.58135e-05	0.000123592	0.158346	0.302049	0.000728413	0.538877	UP_TGF
LRRC66	2	49.5625	1.57234	0.374122	4.20274	2.63701e-05	0.000126035	0.139991	0.106444	0.0538136	0.699751	UP_TGF
CDH15	2	78.4585	-1.60794	0.382759	-4.20092	2.65831e-05	0.000126904	0.0540749	0.128414	0.0507515	0.76676	UP_BMP
ACSF2	2	1405.61	-1.01288	0.241254	-4.19838	2.6883e-05	0.000128261	0.0919442	0.0496462	0.113847	0.744563	UP_BMP
OPLAH	2	322.938	-0.847059	0.20188	-4.19586	2.71838e-05	0.000129506	0.112241	0.177349	0.297574	0.412836	UP_BMP
PRDX6	2	4240.97	-0.72789	0.173523	-4.19478	2.73135e-05	0.000130086	0.263663	0.369951	0.022285	0.344101	UP_BMP
ZHX3	2	2738.09	-0.893688	0.213178	-4.19221	2.76252e-05	0.000131494	0.273308	0.221989	0.0458442	0.458858	UP_BMP
SPRY2	2	500.22	1.38973	0.332012	4.18578	2.8419e-05	0.000135115	0.0252152	0.474628	0.218585	0.281572	UP_TGF
SNX30	2	1565.94	-0.929448	0.222134	-4.18418	2.86202e-05	0.000135992	0.0214525	0.0370329	0.200287	0.741228	UP_BMP
PITHD1	2	969.452	-0.777079	0.186102	-4.17555	2.97267e-05	0.00014088	0.26047	0.0607783	0.059545	0.619207	UP_BMP
NCDN	2	1422.58	-0.758845	0.182189	-4.16515	3.11144e-05	0.000146773	0.015307	0.0887575	0.0191948	0.876741	UP_BMP
RIPOR2	2	57.3433	1.57952	0.379411	4.16308	3.13988e-05	0.000148029	0.113562	0.293465	0.017617	0.575356	UP_TGF
TMTC1	2	2293.91	-0.788824	0.189486	-4.16297	3.14134e-05	0.000148056	0.270635	0.344323	0.0872802	0.297762	UP_BMP
ETHE1	2	205.675	1.14255	0.274957	4.15538	3.24744e-05	0.000152835	0.170536	0.0880336	0.150103	0.591328	UP_TGF
UBXN7	2	2132.78	-0.563337	0.135668	-4.15231	3.29141e-05	0.000154815	0.0830395	0.0880981	0.193257	0.635605	UP_BMP
E2F1	2	219.223	0.950956	0.229268	4.14778	3.35708e-05	0.00015754	0.0188328	0.00067383	0.357096	0.623397	UP_TGF
HSBP1L1	2	115.709	-1.18909	0.286718	-4.14724	3.36502e-05	0.000157867	0.0873097	0.329416	0.10322	0.480054	UP_BMP
MFSD11	2	1003.45	0.571138	0.137752	4.14614	3.38133e-05	0.000158496	0.203755	0.128691	0.0927327	0.574821	UP_TGF
PNP	2	657.695	1.07384	0.259008	4.14598	3.38363e-05	0.000158558	0.0871859	0.139988	0.303974	0.468852	UP_TGF
GBP3	2	59.6748	1.49065	0.359754	4.14354	3.4198e-05	0.000160087	0.00816949	0.00292506	0.107156	0.881749	UP_TGF
TOLLIP	2	1849.27	-0.711574	0.17174	-4.14333	3.42302e-05	0.000160173	0.131672	0.0934359	0.174471	0.600421	UP_BMP
ATP1B1	2	2125.97	-0.907971	0.219582	-4.13499	3.54966e-05	0.000165529	0.171873	0.429954	0.151879	0.246294	UP_BMP
TACSTD2	2	78.725	2.10834	0.51005	4.13359	3.57147e-05	0.000166356	0.0823446	0.250194	0.352371	0.31509	UP_TGF
AAK1	2	602.346	-0.61543	0.149002	-4.13033	3.62238e-05	0.000168631	0.179513	0.0796778	0.0623563	0.678453	UP_BMP
UQCRQ	2	1506.47	-0.882576	0.214377	-4.11693	3.83958e-05	0.000177979	0.221972	0.323468	0.140787	0.313774	UP_BMP
LEMD2	2	2085.91	0.788494	0.191555	4.11627	3.85046e-05	0.000178361	0.00391852	0.350806	0.242896	0.402379	UP_TGF
PXN	2	1987.16	0.799778	0.194401	4.11407	3.88747e-05	0.000179994	0.0229133	0.182781	0.162323	0.631983	UP_TGF
NRIP3	2	97.0438	1.52567	0.370892	4.11353	3.89659e-05	0.000180314	0.0689981	0.00481112	0.0762904	0.8499	UP_TGF
CD99L2	2	3906.28	-0.64661	0.157241	-4.11224	3.91846e-05	0.000181275	0.159576	0.00887626	0.102273	0.729275	UP_BMP
PRUNE1	2	859.338	-0.586064	0.142529	-4.1119	3.9242e-05	0.000181488	0.00639736	0.326921	0.0205926	0.646089	UP_BMP
KIF21A	2	682.169	-0.753883	0.183444	-4.1096	3.96342e-05	0.000183043	0.0425522	0.0458409	0.116466	0.795141	UP_BMP
FAAP20	2	866.486	0.665764	0.162527	4.09632	4.19764e-05	0.000192822	0.0235887	0.310104	0.0392989	0.627008	UP_TGF
RHOB	2	7502.41	0.701736	0.171929	4.08154	4.47381e-05	0.000204815	0.303099	0.104496	0.0520791	0.540326	UP_TGF
ERICH5	2	24.6447	-2.77239	0.681063	-4.07069	4.68749e-05	0.000213936	0.0646077	0.359938	0.340015	0.235439	UP_BMP
UBB	2	11135.9	-0.611338	0.150258	-4.06858	4.73001e-05	0.000215696	0.196874	0.271456	0.0278332	0.503837	UP_BMP
MORC4	2	1576.9	0.554054	0.136744	4.05175	5.08363e-05	0.000229956	0.286567	0.333953	0.0355981	0.343882	UP_TGF
STARD13	2	1564.65	0.717671	0.177405	4.04539	5.22353e-05	0.000235826	0.267001	0.00536155	0.0427548	0.684883	UP_TGF
CENPB	2	1903.61	0.603505	0.149531	4.03598	5.43756e-05	0.000244853	0.0328519	0.102436	0.158636	0.706076	UP_TGF
ULK1	2	1741.47	0.496529	0.123027	4.03594	5.4385e-05	0.000244853	0.0841864	0.296562	0.127562	0.49169	UP_TGF
KLF12	2	1247.85	0.678852	0.168442	4.03017	5.5736e-05	0.000250589	0.159263	0.106671	0.0632018	0.670864	UP_TGF
SLC46A3	2	366.494	1.29407	0.321596	4.02391	5.72403e-05	0.000256927	0.00110108	0.269031	0.0033057	0.726562	UP_TGF
PLEKHG4B	2	480.648	0.847349	0.210791	4.01985	5.82363e-05	0.000260967	0.000905349	0.280201	0.310001	0.408893	UP_TGF
ZNF316	2	801.641	0.70184	0.175214	4.00563	6.18536e-05	0.000275736	0.0476902	0.274742	0.00750941	0.670059	UP_TGF
KCTD6	2	264.245	0.842875	0.21123	3.99031	6.5987e-05	0.0002928	0.19288	0.284559	0.249101	0.27346	UP_TGF
CLEC3B	2	284.469	-1.41445	0.354482	-3.99018	6.60228e-05	0.00029288	0.163784	0.12989	0.006928	0.699398	UP_BMP
TRIM46	2	110.532	1.45481	0.365273	3.98282	6.81035e-05	0.000301535	0.0175309	0.0100458	0.311907	0.660517	UP_TGF
CASP3	2	334.301	1.03057	0.259413	3.9727	7.10617e-05	0.000313271	0.0414736	0.0726743	0.102382	0.783471	UP_TGF
ECE2	2	168.665	-1.31021	0.330125	-3.96882	7.22296e-05	0.000317732	0.165963	0.40952	0.0861602	0.338357	UP_BMP
SMC5	2	1515.89	0.852968	0.215883	3.95107	7.78017e-05	0.000340319	0.236491	0.181513	0.0146382	0.567358	UP_TGF
DDX39A	2	615.539	0.694652	0.175899	3.94916	7.84272e-05	0.000342774	0.0846614	0.173703	0.281042	0.460593	UP_TGF
SMARCC2	2	3061.67	0.603841	0.152902	3.94922	7.84077e-05	0.000342774	0.102017	0.180453	0.349078	0.368453	UP_TGF
GALNS	2	834.783	0.579058	0.146728	3.94647	7.93112e-05	0.000345989	0.0947826	0.146222	0.0774396	0.681556	UP_TGF
SH3KBP1	2	2034.17	-0.604225	0.153139	-3.9456	7.95994e-05	0.000347153	0.26866	0.000327841	0.252367	0.478645	UP_BMP
IRX1	2	244.929	1.05958	0.268967	3.93943	8.16755e-05	0.000355257	0.18873	0.223205	0.180275	0.40779	UP_TGF
TDRD9	2	34.9937	1.96165	0.498857	3.93229	8.41391e-05	0.000364896	0.123447	0.134359	0.107863	0.634331	UP_TGF
RGMA	2	690.259	1.06126	0.269998	3.93061	8.47299e-05	0.000367073	0.0786828	0.191555	0.360848	0.368914	UP_TGF
CBX4	2	935.689	-0.638515	0.162537	-3.92843	8.55028e-05	0.000370126	0.156055	0.0389557	0.0934103	0.711579	UP_BMP
SESTD1	2	1858.35	-0.842018	0.214362	-3.92803	8.56455e-05	0.000370645	0.0013022	0.0663864	0.27511	0.657202	UP_BMP
RBPMS-AS1	2	36.5849	-1.96582	0.501325	-3.92125	8.80906e-05	0.000380217	0.119337	0.318761	0.0870112	0.474891	UP_BMP
PNMA8A	2	1185.89	0.650791	0.166	3.92042	8.83941e-05	0.000381426	0.188995	0.0192768	0.175971	0.615758	UP_TGF
RWDD2A	2	172.842	0.896205	0.228729	3.9182	8.92141e-05	0.000384557	0.0692547	0.0267643	0.153506	0.750475	UP_TGF
ELMO1	2	274.919	1.24764	0.318929	3.91197	9.15481e-05	0.000393993	0.080366	0.0502968	0.22879	0.640547	UP_TGF
ANKIB1	2	2168.33	-0.532582	0.136167	-3.91124	9.18251e-05	0.000394872	0.238513	0.280905	0.0482861	0.432295	UP_BMP
PDE1C	2	60.4943	-1.92456	0.492135	-3.91064	9.20523e-05	0.000395641	4.68873e-05	0.410938	0.268394	0.320622	UP_BMP
EXOC6B	2	975.777	-0.679344	0.173811	-3.90853	9.28596e-05	0.0003989	0.0103705	0.113291	0.209366	0.666973	UP_BMP
HSPA12A	2	455.765	0.707572	0.181047	3.90821	9.29814e-05	0.000399049	0.0946557	0.084157	0.107439	0.713748	UP_TGF
LETM2	2	116.433	1.1125	0.284935	3.90438	9.44655e-05	0.000404838	0.275961	0.0989728	0.0960044	0.529062	UP_TGF
NDUFA2	2	587.271	-0.730076	0.187407	-3.89567	9.79263e-05	0.000418788	0.064215	0.0412231	0.00506243	0.889499	UP_BMP
CDH3	2	170.664	1.21668	0.312523	3.89309	9.89757e-05	0.000422943	0.0860342	0.163294	0.044697	0.705975	UP_TGF
NDUFA4L2	2	3452.29	2.94195	0.756651	3.88812	0.000101025	0.000431024	0.211472	0.00905526	0.0349376	0.744535	UP_TGF
EXOSC10	2	2156.3	0.513189	0.132065	3.88588	0.000101959	0.000434349	0.176358	0.041824	0.0876475	0.694171	UP_TGF
IFT140	2	1041.68	0.619851	0.159572	3.88445	0.000102563	0.000436783	0.09742	0.175158	0.130998	0.596424	UP_TGF
MPP2	2	242.343	1.32096	0.340122	3.88379	0.000102843	0.000437747	0.159286	0.359855	0.0080178	0.472841	UP_TGF
PARP8	2	314.658	1.09985	0.283371	3.88132	0.000103891	0.000441632	0.0116439	0.32977	0.0519102	0.606675	UP_TGF
USP9X	2	5195.24	-0.676871	0.174557	-3.87765	0.000105469	0.000447989	0.268314	0.336475	0.192099	0.203112	UP_BMP
NEK6	2	2292.62	0.697629	0.180267	3.86997	0.00010885	0.000461507	0.116627	0.0745064	0.220588	0.588278	UP_TGF
B3GNT9	2	2134.65	0.606238	0.156742	3.86774	0.00010985	0.000465266	0.268272	0.257141	0.210082	0.264505	UP_TGF
TNS2	2	7522.37	0.9439	0.24413	3.86639	0.000110459	0.00046748	0.0105882	0.239266	0.0532327	0.696913	UP_TGF
AURKB	2	119.195	1.32282	0.342193	3.8657	0.00011077	0.000468675	0.133963	0.43874	0.0339821	0.393315	UP_TGF
NLRP1	2	2736.01	2.25807	0.584496	3.86328	0.000111874	0.000473099	0.173212	0.234953	0.00614421	0.585691	UP_TGF
MGST3	2	1241.76	0.541072	0.140346	3.85528	0.000115598	0.000487076	0.206407	0.114717	0.0538583	0.625018	UP_TGF
TIMM8B	2	616.367	-0.985356	0.255807	-3.85195	0.000117182	0.000493371	0.0588744	0.368333	0.2061	0.366692	UP_BMP
TTL	2	1426.13	0.720374	0.187027	3.8517	0.000117299	0.000493735	0.28052	0.021064	0.0735863	0.62483	UP_TGF
UBR3	2	1614.58	-0.672736	0.174853	-3.84745	0.000119354	0.000501866	0.24804	0.0936863	0.0391173	0.619156	UP_BMP
CRYZL2P-SEC16B	2	413.263	0.744811	0.193855	3.84211	0.000121979	0.000511585	0.0453152	0.00365439	0.292381	0.65865	UP_TGF
DCBLD1	2	375.582	0.978399	0.255138	3.83479	0.000125674	0.000525863	0.0821263	0.011673	0.027799	0.878402	UP_TGF
GPR75	2	114.392	-1.14191	0.298204	-3.8293	0.00012851	0.000536901	0.250522	0.301647	0.0672249	0.380606	UP_BMP
MXRA8	2	8237.58	0.588649	0.153731	3.82908	0.000128623	0.0005371	0.238947	0.13988	0.0792981	0.541875	UP_TGF
DNMT1	2	1322.25	0.579326	0.151313	3.82867	0.000128839	0.000537588	0.273741	0.00777165	0.220281	0.498206	UP_TGF
LETM1	2	1736.97	-0.666837	0.174478	-3.82191	0.000132424	0.000551237	0.268192	0.0227779	0.221054	0.487976	UP_BMP
RFX8	2	22.1997	3.56759	0.933473	3.82185	0.000132456	0.000551237	0.1564	0.347356	0.17763	0.318615	UP_TGF
KCTD20	2	4044.95	-0.551235	0.144495	-3.81492	0.000136228	0.000566535	0.0673802	0.198328	0.15885	0.575441	UP_BMP
JUND	2	2670.5	0.547027	0.143518	3.81156	0.000138094	0.000573561	0.0384888	0.203998	0.0211641	0.736349	UP_TGF
CENPVL3	2	17.0107	-3.90348	1.02431	-3.81083	0.000138502	0.000574965	0.0395616	0.0964883	0.0375543	0.826396	UP_BMP
CADPS	2	40.5876	-2.01638	0.530209	-3.803	0.000142956	0.000591741	0.179861	0.0171284	0.00679849	0.796213	UP_BMP
CLTB	2	1423.88	-0.938419	0.247028	-3.79884	0.000145375	0.000601045	0.196101	0.353292	0.106494	0.344113	UP_BMP
TOP3A	2	834.646	0.508253	0.133877	3.79643	0.000146797	0.000606158	0.130854	0.216749	0.125034	0.527363	UP_TGF
CCDC114	2	83.7233	1.68128	0.442951	3.79563	0.000147266	0.000607787	0.0414964	0.108314	0.0472087	0.802981	UP_TGF
NIPSNAP3A	2	518.967	-0.948	0.250173	-3.78938	0.000151022	0.00062171	0.0740236	0.277888	0.0279479	0.620141	UP_BMP
OXCT1	2	1464.32	1.08354	0.286046	3.78798	0.000151879	0.00062461	0.0694725	0.178879	0.244016	0.507632	UP_TGF
CCDC85C	2	123.848	1.32574	0.350015	3.78768	0.000152059	0.00062519	0.224276	0.112954	0.0702997	0.59247	UP_TGF
ADAMTS1	2	1036.91	-1.07664	0.284445	-3.78507	0.000153668	0.000630694	0.209161	0.107477	0.0382542	0.645108	UP_BMP
ADAMTS9	2	1302.78	-0.893814	0.236163	-3.78473	0.000153875	0.000631383	0.0616029	0.330065	0.0477973	0.560535	UP_BMP
CDKN2D	2	281.863	0.821178	0.217193	3.78086	0.000156288	0.000640638	0.144435	0.0130701	0.334547	0.507947	UP_TGF
NFKB1	2	811.656	0.650997	0.172243	3.77953	0.000157127	0.000643592	0.0122135	0.340232	0.045589	0.601966	UP_TGF
SLC48A1	2	306.408	0.839892	0.222429	3.776	0.000159366	0.000652107	0.115183	0.341244	0.0526403	0.490933	UP_TGF
DNAH17	2	17.2392	2.54932	0.675486	3.77405	0.000160621	0.00065642	0.273862	0.0722154	0.105323	0.548599	UP_TGF
BCL3	2	162.4	1.30783	0.347273	3.766	0.000165885	0.000676068	0.00298482	0.117224	0.305628	0.574164	UP_TGF
MAST3	2	488.658	-0.603067	0.160624	-3.75452	0.000173675	0.000705172	0.184033	0.046373	0.0435752	0.726018	UP_BMP
SLC15A1	2	53.263	-1.45376	0.387979	-3.74702	0.00017895	0.000725325	0.0183333	0.304616	0.119057	0.557994	UP_BMP
GDF6	2	57.7188	2.0011	0.534069	3.74689	0.000179039	0.000725505	0.125098	0.0586074	0.217521	0.598774	UP_TGF
GPR27	2	339.757	0.800758	0.213821	3.74499	0.000180401	0.000730298	0.126266	0.0471561	0.280335	0.546244	UP_TGF
GBA	2	117.087	1.11462	0.29791	3.74145	0.00018296	0.000738822	0.183944	0.319138	0.0595861	0.437332	UP_TGF
TIE1	2	74.193	1.36187	0.36488	3.73238	0.000189678	0.00076368	0.0941495	0.388187	0.207075	0.310588	UP_TGF
KCNK2	2	514.578	0.925986	0.248127	3.73191	0.000190034	0.000764925	0.0833988	0.134847	0.39598	0.385775	UP_TGF
PTPRN2	2	24.7845	-3.04759	0.817319	-3.72877	0.000192419	0.000774142	0.201912	0.0271656	0.023253	0.747669	UP_BMP
GAL	2	50.2246	-1.80851	0.485715	-3.72341	0.000196552	0.000788821	0.0744891	0.177908	0.0464189	0.701184	UP_BMP
NFATC1	2	1703.93	0.550244	0.147944	3.71926	0.000199805	0.000800499	0.127079	0.299864	0.28461	0.288447	UP_TGF
NAA50	2	1772.49	-0.447546	0.120392	-3.7174	0.000201285	0.000805833	0.212672	0.00131747	0.124777	0.661234	UP_BMP
LRP12	2	741.307	1.0193	0.274214	3.71716	0.000201476	0.0008064	0.101123	0.00956251	0.00425943	0.885055	UP_TGF
HSDL2	2	973.276	-0.696516	0.187398	-3.71677	0.000201784	0.000807432	0.0902256	0.00204167	0.154394	0.753339	UP_BMP
EML6	2	105.863	1.13733	0.306489	3.71084	0.000206574	0.000824979	0.00511599	0.0881179	0.0244121	0.882354	UP_TGF
QPCT	2	28.9194	2.02371	0.545465	3.71007	0.000207203	0.000827288	0.00459014	0.316626	0.339283	0.339501	UP_TGF
TSR1	2	1369.63	-0.798627	0.215737	-3.70186	0.000214024	0.000851602	0.277412	0.0091721	0.0744126	0.639003	UP_BMP
ANK3	2	703.752	1.04524	0.283354	3.68881	0.000225304	0.000891913	0.00298494	0.286545	0.11972	0.59075	UP_TGF
CYB5R2	2	196.099	0.846519	0.229758	3.68439	0.000229247	0.000906423	0.0494472	0.0504861	0.0110603	0.889006	UP_TGF
INTS3	2	422.336	1.20449	0.327055	3.68285	0.000230643	0.000910617	0.198685	0.0426682	0.217106	0.541541	UP_TGF
PEG10	2	4602.37	-0.976018	0.265636	-3.67427	0.000238533	0.000940172	0.149771	0.000408628	0.00894665	0.840874	UP_BMP
ABRAXAS1	2	657.41	0.652193	0.177581	3.67266	0.00024004	0.000944742	0.00187004	0.262054	0.418109	0.317968	UP_TGF
POU2F3	2	36.39	1.71237	0.466653	3.66947	0.000243055	0.000955454	0.24703	0.229262	0.0709531	0.452755	UP_TGF
TMPPE	2	108.324	-1.12895	0.308515	-3.6593	0.00025291	0.000991325	0.280132	0.0118963	0.224715	0.483257	UP_BMP
SPSB3	2	682.32	0.661849	0.180945	3.65775	0.000254443	0.000996614	0.177289	0.0959962	0.177961	0.548754	UP_TGF
ZFP42	2	101.493	-0.969239	0.265478	-3.65092	0.000261305	0.00102104	0.276445	0.323088	0.0874743	0.312993	UP_BMP
DYRK2	2	968.599	0.718847	0.196957	3.64978	0.00026247	0.0010251	0.178163	0.0142511	0.130289	0.677296	UP_TGF
TMA7	2	2406.12	-0.60071	0.16471	-3.64708	0.000265235	0.0010354	0.0102038	0.00483801	0.108191	0.876767	UP_BMP
TNFSF10	2	20.8586	2.24069	0.614678	3.64531	0.000267074	0.00104183	0.099073	0.0167551	0.237172	0.647	UP_TGF
SGCE	2	1059.57	0.882248	0.242213	3.64245	0.000270057	0.00105246	0.204737	0.0162509	0.0696541	0.709358	UP_TGF
INTS11	2	2352.25	0.540262	0.148426	3.63994	0.000272699	0.00106123	0.13845	0.278041	0.250573	0.332937	UP_TGF
NME4	2	3299.08	-0.605782	0.16653	-3.63767	0.000275118	0.00106912	0.128127	0.0011967	0.29155	0.579126	UP_BMP
AHNAK2	2	9382.24	2.30907	0.634827	3.63732	0.00027549	0.00107004	0.0812949	0.107139	0.106448	0.705118	UP_TGF
ZNF697	2	223.425	0.745244	0.204923	3.6367	0.000276157	0.00107189	0.0996134	0.209385	0.0876103	0.603392	UP_TGF
ST6GALNAC3	2	132.552	1.26784	0.348673	3.63619	0.000276705	0.00107349	0.20049	0.298181	0.0991806	0.402149	UP_TGF
TMEM60	2	416.297	-0.618022	0.1702	-3.63115	0.000282165	0.00109337	0.183482	0.156524	0.111553	0.548442	UP_BMP
SREK1	2	2312.89	-0.480891	0.132596	-3.62673	0.000287037	0.0011104	0.294202	0.0652161	0.016648	0.623934	UP_BMP
TMEM106A	2	856.797	-0.496091	0.137109	-3.61822	0.000296639	0.0011451	0.213842	0.11711	0.000579953	0.668468	UP_BMP
NAP1L5	2	265.144	-1.04018	0.287725	-3.61519	0.000300129	0.00115748	0.0888371	0.100182	0.382193	0.428788	UP_BMP
TGFBR3L	2	100.686	1.3369	0.37085	3.60497	0.000312185	0.00120142	0.186178	0.340496	0.0730571	0.400268	UP_TGF
C6orf141	2	123.851	-1.62476	0.450865	-3.60365	0.000313776	0.00120583	0.129762	0.0916955	0.063654	0.714888	UP_BMP
SMC2	2	704.347	0.7283	0.202232	3.6013	0.000316626	0.00121593	0.109728	0.056076	0.151493	0.682702	UP_TGF
CARD11	2	22.7369	3.13607	0.871169	3.59984	0.000318408	0.00122248	0.0370127	0.0913247	0.369549	0.502114	UP_TGF
HMBS	2	286.066	-0.861356	0.239598	-3.59501	0.000324382	0.00124366	0.204956	0.194237	0.102747	0.49806	UP_BMP
PIMREG	2	154.331	0.985156	0.274521	3.58864	0.000332412	0.00127115	0.196672	0.0560285	0.000344625	0.746955	UP_TGF
PCIF1	2	811.721	0.671199	0.187077	3.58781	0.000333464	0.00127458	0.223014	0.243685	0.0304091	0.502891	UP_TGF
NASP	2	2158.51	0.65087	0.181434	3.58737	0.000334034	0.00127646	0.298061	0.0628462	0.0514818	0.587611	UP_TGF
E2F7	2	78.1265	1.29473	0.3611	3.58551	0.000336422	0.00128468	0.023792	0.329163	0.0839521	0.563093	UP_TGF
LSS	2	9529.22	-0.732453	0.204766	-3.57702	0.000347536	0.00132172	0.0529285	0.156651	0.350126	0.440294	UP_BMP
OAS2	2	79.5787	-1.48034	0.413852	-3.57698	0.000347583	0.00132172	0.212877	0.266499	0.0202519	0.500373	UP_BMP
COX7B	2	1170.23	-0.659546	0.185073	-3.56371	0.000365655	0.00138431	0.0231891	0.248136	0.407237	0.321437	UP_BMP
ZNF267	2	153.455	1.05223	0.295275	3.56355	0.000365874	0.00138482	0.024584	0.151536	0.378493	0.445387	UP_TGF
PRMT5	2	1438.28	-0.48396	0.135985	-3.55892	0.000372384	0.00140782	0.29973	0.0847895	0.0126695	0.602811	UP_BMP
ADH1B	2	126.038	-1.85487	0.521356	-3.55778	0.000374009	0.00141364	0.149266	0.113946	0.406735	0.330053	UP_BMP
MASTL	2	451.297	0.594062	0.167389	3.549	0.0003867	0.00145519	0.204673	0.00118072	0.134232	0.659914	UP_TGF
LMX1B	2	254.851	1.47969	0.417766	3.5419	0.000397255	0.00149181	0.105759	0.347718	0.208276	0.338247	UP_TGF
CPT2	2	468.744	-0.618555	0.174672	-3.54123	0.000398267	0.00149492	0.239483	0.133884	0.000940931	0.625692	UP_BMP
ANKRD18B	2	43.7865	-1.55415	0.439321	-3.53763	0.000403742	0.00151199	0.16978	0.144059	0.250762	0.435398	UP_BMP
NIM1K	2	156.419	-0.966138	0.273815	-3.52844	0.000418017	0.00156079	0.167959	0.0274742	0.142285	0.662281	UP_BMP
UGDH	2	2855.56	-0.738732	0.209521	-3.52582	0.00042218	0.00157525	0.050296	0.189916	0.359394	0.400394	UP_BMP
CCNA2	2	307.856	1.06809	0.303025	3.52475	0.000423882	0.00158051	0.100514	0.243853	0.271182	0.384452	UP_TGF
RAB11FIP4	2	4395.23	-0.673782	0.191234	-3.52334	0.000426151	0.00158861	0.0396992	0.113197	0.0106309	0.836473	UP_BMP
CPSF6	2	1591.09	-0.581524	0.165103	-3.52218	0.00042801	0.00159445	0.0014709	0.237785	0.250912	0.509831	UP_BMP
LGR6	2	254.043	1.30601	0.370815	3.522	0.000428308	0.00159519	0.18437	0.0343431	0.0855956	0.695692	UP_TGF
COMMD1	2	517.742	-0.795332	0.225895	-3.52081	0.00043023	0.00160162	0.0303812	0.195204	0.325097	0.449318	UP_BMP
ZNF542P	2	298.08	-0.633539	0.179966	-3.52033	0.000431009	0.00160415	0.160197	0.336527	0.0350647	0.468211	UP_BMP
PNRC2	2	693.564	-0.51684	0.146877	-3.51886	0.000433408	0.00161235	0.0850978	0.0816347	0.109011	0.724256	UP_BMP
MRPS33	2	730.13	-0.594313	0.16906	-3.51539	0.000439113	0.00163319	0.26033	0.0094104	0.256063	0.474197	UP_BMP
TCF7	2	134.884	-0.996861	0.283648	-3.51443	0.0004407	0.00163798	0.0669303	0.00207491	0.304061	0.626934	UP_BMP
TOE1	2	360.718	-1.09422	0.311559	-3.51208	0.000444608	0.001651	0.0980153	0.281398	0.0997495	0.520838	UP_BMP
RAMP1	2	646.284	-1.31426	0.374666	-3.50783	0.000451779	0.00167305	0.0324432	0.183347	0.447435	0.336775	UP_BMP
XPR1	2	2020.26	-1.10569	0.315242	-3.50744	0.000452434	0.0016751	0.10673	0.0685185	0.385993	0.438758	UP_BMP
GATD1	2	2496.65	-0.445106	0.126984	-3.50521	0.000456254	0.0016878	0.0619621	0.325441	0.0448016	0.567796	UP_BMP
CRTC1	2	631.351	0.597181	0.170528	3.50196	0.000461851	0.00170531	0.0185118	0.459284	0.333729	0.188476	UP_TGF
COX17	2	371.259	-0.79357	0.226738	-3.49994	0.000465371	0.00171636	0.00749358	0.162508	0.436898	0.393101	UP_BMP
FAM83D	2	109.493	1.33561	0.381822	3.498	0.000468761	0.0017273	0.178949	0.174716	0.0711337	0.575202	UP_TGF
MIB2	2	1687.78	0.588807	0.168565	3.49305	0.000477541	0.00175727	0.077461	0.219021	0.213545	0.489974	UP_TGF
TRAF4	2	1026.02	-0.75015	0.21477	-3.49281	0.000477975	0.00175847	0.259036	0.261095	0.122321	0.357548	UP_BMP
RFC2	2	365.193	0.661129	0.189315	3.49221	0.000479039	0.00176159	0.0981667	0.338566	0.19931	0.363957	UP_TGF
RNF175	2	102.077	1.52724	0.437798	3.48847	0.000485793	0.00178361	0.247768	0.307683	0.135021	0.309528	UP_TGF
METTL8	2	289.24	-0.620412	0.17789	-3.48762	0.000487336	0.00178847	0.171895	0.0617035	0.189344	0.577058	UP_BMP
PLA2G6	2	368.097	0.654096	0.188027	3.47872	0.000503806	0.00184187	0.245444	0.120967	0.0602917	0.573297	UP_TGF
PARVB	2	1177.11	-0.608719	0.175029	-3.47782	0.000505511	0.00184727	0.186413	0.453304	0.0173004	0.342983	UP_BMP
MRPL41	2	618.573	-0.711434	0.204667	-3.47605	0.00050885	0.00185767	0.315988	0.307095	0.0185807	0.358336	UP_BMP
ANKRD13D	2	842.463	0.526181	0.151419	3.475	0.000510857	0.00186388	0.128342	0.271475	0.0400823	0.5601	UP_TGF
ASAP1	2	1015.67	0.637482	0.183586	3.4724	0.000515834	0.00188118	0.0430347	0.0622946	0.115925	0.778745	UP_TGF
TYMP	2	132.427	0.987526	0.284419	3.47208	0.000516443	0.00188215	0.0791317	0.0886046	0.17574	0.656523	UP_TGF
NXPH3	2	165.222	1.08005	0.311234	3.47021	0.000520052	0.00189488	0.0516005	0.146334	0.0263442	0.775721	UP_TGF
SETDB1	2	1467.48	0.598322	0.172511	3.46831	0.000523746	0.00190735	0.236371	0.349666	0.0676672	0.346296	UP_TGF
MRPL53	2	636.257	-0.53441	0.154309	-3.46323	0.000533723	0.00193993	0.0543715	0.270773	0.287239	0.387617	UP_BMP
BOC	2	8469.84	2.0213	0.583695	3.46294	0.000534315	0.00194164	0.0420443	0.225236	0.229622	0.503097	UP_TGF
UBL5	2	1460.83	-0.600817	0.174084	-3.45131	0.000557879	0.00202186	0.129933	0.236545	0.27793	0.355592	UP_BMP
EDA2R	2	135.1	-0.966011	0.28005	-3.44942	0.000561785	0.00203466	0.156088	0.210136	0.0335669	0.600209	UP_BMP
GPX4	2	2376.22	-0.645592	0.187289	-3.44704	0.00056676	0.0020504	0.0807672	0.304736	0.314894	0.299603	UP_BMP
RNF41	2	1440.36	0.472038	0.13703	3.44479	0.000571507	0.00206528	0.165494	0.00425329	0.344649	0.485604	UP_TGF
PPP2R3A	2	614.859	0.646582	0.187896	3.44116	0.00057922	0.00208991	0.172222	0.10012	0.0898483	0.637809	UP_TGF
LBX2-AS1	2	95.3312	0.978567	0.284597	3.43843	0.000585089	0.00210831	0.000391911	0.35133	0.212145	0.436133	UP_TGF
RSL24D1	2	1713.51	0.462163	0.134427	3.43802	0.000585975	0.00211101	0.177443	0.00334251	0.213103	0.606111	UP_TGF
CTDNEP1	2	2481.91	0.469347	0.137384	3.4163	0.000634778	0.00227426	0.14835	0.349409	0.0937106	0.40853	UP_TGF
SF3B6	2	1294.35	-0.57279	0.167746	-3.41462	0.000638713	0.00228689	0.0629549	0.173515	0.25373	0.5098	UP_BMP
RIPK2	2	229.131	0.712272	0.208844	3.41054	0.000648344	0.00231675	0.0153203	0.211802	0.0594212	0.713456	UP_TGF
DACT1	2	1454.2	0.997861	0.292643	3.40982	0.000650056	0.00232185	0.0724994	0.235203	0.135271	0.557027	UP_TGF
LTK	2	24.8504	-2.85321	0.837328	-3.40752	0.000655559	0.00233926	0.147424	0.147576	0.0217224	0.683277	UP_BMP
GALE	2	1340.19	-0.703377	0.206677	-3.40326	0.000665868	0.00237209	0.237223	0.194302	0.0779586	0.490517	UP_BMP
LDLRAP1	2	1119.81	0.542452	0.159401	3.40307	0.000666342	0.00237276	0.245531	0.227999	0.0387036	0.487767	UP_TGF
BORCS5	2	211.533	-0.776444	0.228356	-3.40014	0.000673507	0.00239494	0.166455	0.0446932	0.0776189	0.711233	UP_BMP
TDRP	2	228.021	1.01907	0.300029	3.39657	0.000682351	0.00242445	0.0467944	0.02272	0.144365	0.786121	UP_TGF
NECAP1	2	1073.86	-0.467615	0.137682	-3.39635	0.000682911	0.00242591	0.0486904	0.41356	0.334723	0.203026	UP_BMP
CDO1	2	2356.43	1.16756	0.344223	3.39187	0.000694184	0.00246166	0.101486	0.112412	0.255215	0.530887	UP_TGF
MTMR3	2	3049.49	-0.512904	0.151267	-3.39072	0.000697098	0.00247039	0.232422	0.0354863	0.0560304	0.676061	UP_BMP
IKBKB	2	794.384	0.560612	0.165346	3.39054	0.000697563	0.0024715	0.223677	0.133999	0.0959261	0.546398	UP_TGF
AFG3L1P	2	496.273	0.571208	0.168883	3.38227	0.000718891	0.00254098	0.0980783	0.0935119	0.414684	0.393726	UP_TGF
RUVBL1	2	579.509	-0.55377	0.163788	-3.38102	0.000722181	0.00255095	0.171654	0.0210067	0.264766	0.542573	UP_BMP
MAD2L1	2	164.743	0.760907	0.225517	3.37405	0.000740703	0.00261072	0.130651	0.233679	0.257561	0.378109	UP_TGF
RUBCN	2	646.596	0.684902	0.203112	3.37205	0.000746116	0.00262866	0.202033	0.344541	0.199865	0.25356	UP_TGF
GPR156	2	71.2777	-1.41643	0.420096	-3.37167	0.000747149	0.00263173	0.138423	0.031326	0.18247	0.647781	UP_BMP
SSPO	2	524.791	2.52514	0.74899	3.3714	0.00074787	0.00263314	0.17287	0.256221	0.108972	0.461937	UP_TGF
IQCK	2	173.527	-1.08479	0.322306	-3.36572	0.000763453	0.00268105	0.107936	0.228479	0.231616	0.431968	UP_BMP
PTGER4	2	24.8475	-2.11565	0.629441	-3.36115	0.000776178	0.00272244	0.172319	0.247921	0.165765	0.413994	UP_BMP
MPHOSPH10	2	768.602	0.492473	0.146679	3.35749	0.000786534	0.0027538	0.211877	0.0637965	0.0473581	0.676968	UP_TGF
LYRM1	2	371.402	0.57343	0.170892	3.35551	0.000792186	0.00277061	0.306894	0.143958	0.0235369	0.525611	UP_TGF
SNUPN	2	459.882	0.589368	0.175993	3.34881	0.000811585	0.00283117	0.110374	0.0785518	0.413547	0.397527	UP_TGF
SCO1	2	522.444	-0.648016	0.193777	-3.34413	0.000825409	0.00286956	0.170746	0.0205512	0.200275	0.608428	UP_BMP
C1orf115	2	76.1047	1.61535	0.483273	3.34252	0.000830207	0.00288378	0.195231	0.352209	0.0852385	0.367322	UP_TGF
GNB5	2	519.904	0.62246	0.186634	3.33519	0.000852424	0.00295529	0.0122615	0.120752	0.0192726	0.847714	UP_TGF
DGLUCY	2	767.012	-0.864426	0.259472	-3.33148	0.000863856	0.00299428	0.00661194	0.43754	0.264222	0.291626	UP_BMP
ACVR1	2	1687.62	0.530076	0.159435	3.32472	0.000885076	0.00306588	0.0207282	0.12376	0.0804487	0.775063	UP_TGF
PEX2	2	739.982	-0.480443	0.144522	-3.32437	0.000886186	0.00306907	0.0634932	0.200888	0.344526	0.391092	UP_BMP
PDE3A	2	1326.6	0.591621	0.178186	3.32025	0.00089936	0.00310743	0.054987	0.434669	0.0646208	0.445723	UP_TGF
PCCB	2	472.785	-0.670565	0.203477	-3.29552	0.000982387	0.0033686	0.0124074	0.228368	0.426946	0.332279	UP_BMP
EIF5A2	2	202.445	-1.01013	0.306733	-3.29318	0.000990607	0.0033925	0.0345698	0.192173	0.065945	0.707312	UP_BMP
TMCC2	2	266.864	0.985372	0.299366	3.29153	0.000996454	0.00341038	0.0778756	0.0498813	0.172847	0.699396	UP_TGF
UCKL1	2	727.264	0.639783	0.194489	3.28956	0.00100344	0.00342997	0.243155	0.133304	0.105075	0.518467	UP_TGF
TFE3	2	1552.33	0.534685	0.162607	3.2882	0.0010083	0.00344297	0.013694	0.246735	0.277227	0.462344	UP_TGF
LRRC37A3	2	339.563	0.729508	0.222061	3.28517	0.00101922	0.00347806	0.000100515	0.407708	0.320397	0.271795	UP_TGF
RPL15	2	37465.9	0.35438	0.107998	3.28136	0.00103307	0.00352197	0.0325125	0.12734	0.143548	0.696599	UP_TGF
ZNF92	2	105.344	0.867392	0.264924	3.27412	0.00105992	0.00359963	0.0169724	0.294516	0.170906	0.517605	UP_TGF
FRAT2	2	215.976	-0.731444	0.224239	-3.2619	0.00110668	0.00374438	0.250095	0.0505576	0.0895741	0.609774	UP_BMP
PCDHGA9	2	76.6493	-1.15973	0.355894	-3.25863	0.0011195	0.00378006	0.0183296	0.244618	0.137349	0.599704	UP_BMP
CHODL	2	24.4115	3.16219	0.971701	3.25429	0.00113678	0.00383666	0.319368	0.027316	0.03036	0.622956	UP_TGF
TTF2	2	560.056	-0.536619	0.165118	-3.24991	0.0011544	0.00388809	0.0671284	0.066353	0.112872	0.753646	UP_BMP
DDHD1	2	478.668	-0.621679	0.191368	-3.2486	0.00115973	0.00390361	0.347922	0.00325688	0.0470895	0.601732	UP_BMP
PCNX1	2	2709.03	-0.485851	0.14963	-3.24702	0.00116619	0.00392372	0.119661	0.158982	0.276453	0.444904	UP_BMP
CREBL2	2	995.876	0.61631	0.190216	3.24006	0.00119506	0.00401012	0.0236367	0.187429	0.374486	0.414448	UP_TGF
ARRB1	2	237.779	0.760592	0.234818	3.23906	0.00119923	0.00402243	0.223916	0.18079	0.018511	0.576783	UP_TGF
ATAD3C	2	202.393	0.875344	0.27036	3.2377	0.00120498	0.00404008	0.0115709	0.326998	0.173327	0.488104	UP_TGF
F7	2	128.739	1.4638	0.452536	3.23466	0.00121786	0.00407906	0.0964597	0.212072	0.131542	0.559927	UP_TGF
ZNF639	2	623.566	0.628444	0.19448	3.23141	0.0012318	0.00412235	0.0128594	0.478025	0.228624	0.280491	UP_TGF
HMGCR	2	5986.31	-0.567206	0.175584	-3.2304	0.00123617	0.00413444	0.228928	0.330994	0.123924	0.316153	UP_BMP
C10orf71	2	45.3421	-1.46779	0.45473	-3.22783	0.00124733	0.00416748	0.208782	0.0950761	0.0120632	0.684079	UP_BMP
YPEL3	2	875.093	0.725097	0.224758	3.22613	0.00125477	0.00419062	0.035694	0.030115	0.328804	0.605387	UP_TGF
TMEM250	2	1477.32	-0.669987	0.208207	-3.21789	0.00129137	0.00429876	0.069343	0.223462	0.143849	0.563346	UP_BMP
RASSF4	2	2155.08	1.031	0.32055	3.21635	0.00129831	0.00432097	0.181234	0.240462	0.252212	0.326092	UP_TGF
PEMT	2	350.07	-0.725005	0.225427	-3.21613	0.0012993	0.00432339	0.00639141	0.306278	0.345008	0.342322	UP_BMP
IGFN1	2	128.191	-1.55741	0.484302	-3.21578	0.0013009	0.00432782	0.0128237	0.0724172	0.295845	0.618915	UP_BMP
RPL37A	2	23451.7	-0.425347	0.132292	-3.21522	0.00130345	0.00433457	0.175303	0.333863	0.190296	0.300539	UP_BMP
CA9	2	995.816	3.95519	1.23171	3.21115	0.00132205	0.00439014	0.236271	0.338374	0.131596	0.29376	UP_TGF
CLN8	2	1067.46	0.598236	0.186391	3.20957	0.00132935	0.00441257	0.194527	0.0848269	0.029694	0.690952	UP_TGF
MAGED2	2	12808.8	0.372456	0.116131	3.20721	0.00134031	0.00444534	0.179719	0.10345	0.0993416	0.617489	UP_TGF
APLP2	2	5489.28	0.41163	0.12869	3.19861	0.00138093	0.00456704	0.249382	0.00776314	0.0585331	0.684321	UP_TGF
HHIPL1	2	690.998	0.670846	0.209765	3.19808	0.00138347	0.00457451	0.169277	0.126668	0.0944837	0.609571	UP_TGF
OSTM1	2	649.276	-0.592519	0.185305	-3.19753	0.00138611	0.00458231	0.25846	0.112038	0.00196376	0.627539	UP_BMP
SH3BGRL3	2	3601.63	0.584413	0.182984	3.19379	0.00140419	0.00463645	0.0912754	0.18414	0.256237	0.468347	UP_TGF
JPT2	2	1468.19	-0.532837	0.166945	-3.19169	0.00141443	0.00466743	0.289362	0.0701908	0.0697413	0.570706	UP_BMP
PLCB3	2	775.307	0.557147	0.174738	3.18847	0.0014303	0.00471002	0.12743	0.0688557	0.382792	0.420922	UP_TGF
PDZD7	2	120.693	0.833663	0.261843	3.18383	0.0014534	0.00477763	0.0414599	0.17303	0.0369311	0.748579	UP_TGF
VSNL1	2	36.0056	-1.57952	0.49632	-3.18246	0.00146031	0.00479649	0.119959	0.383415	0.00754898	0.489077	UP_BMP
MSH6	2	1852.48	0.398497	0.125646	3.17158	0.00151612	0.00496378	0.0841513	0.0619168	0.074826	0.779106	UP_TGF
EXOSC5	2	137.41	-1.01242	0.319627	-3.16751	0.00153749	0.00501864	0.140855	0.285215	0.132112	0.441818	UP_BMP
DRAXIN	2	191.556	1.1887	0.375414	3.16638	0.00154349	0.00503721	0.0820261	0.231415	0.176233	0.510325	UP_TGF
UBE2E1	2	1691.49	-0.444923	0.140532	-3.166	0.00154552	0.00504283	0.174016	0.136677	0.081723	0.607584	UP_BMP
HEY2	2	333.788	-0.573676	0.181336	-3.16361	0.00155827	0.00507932	0.107597	0.196441	0.0011332	0.694829	UP_BMP
DCHS2	2	38.7913	1.62928	0.515626	3.15982	0.00157869	0.00513666	0.197548	0.459512	0.00395557	0.338984	UP_TGF
UQCR11	2	1548.06	-0.659481	0.209062	-3.15448	0.00160783	0.00522312	0.0859442	0.0681502	0.00818806	0.837718	UP_BMP
CPA4	2	116.24	1.47189	0.46691	3.15241	0.00161928	0.00525514	0.0140412	0.398023	0.327193	0.260743	UP_TGF
CCDC78	2	36.6077	-1.52475	0.484508	-3.14701	0.00164948	0.00534139	0.193015	0.33641	0.0668991	0.403676	UP_BMP
NDUFS1	2	1958.88	-0.391246	0.124573	-3.14069	0.00168548	0.00544715	0.000333786	0.14445	0.02646	0.828757	UP_BMP
HCFC1	2	3476.3	0.547663	0.174875	3.13173	0.00173778	0.00559289	0.109563	0.436933	0.0149638	0.43854	UP_TGF
CYSLTR1	2	1190.63	-1.85181	0.591328	-3.13161	0.0017385	0.00559409	0.0153453	0.0581061	0.202304	0.724244	UP_BMP
PHGDH	2	2408.82	0.600297	0.191749	3.13063	0.00174432	0.00560949	0.036919	0.119841	0.384656	0.458584	UP_TGF
ARL6IP5	2	3754.94	0.372561	0.119126	3.12746	0.00176325	0.00566702	0.000779417	0.425355	0.352827	0.221038	UP_TGF
IQCN	2	164.666	0.817648	0.26145	3.12736	0.00176383	0.00566777	0.051572	0.343979	0.0640892	0.54036	UP_TGF
RFC5	2	239.249	0.668252	0.213779	3.1259	0.00177262	0.00569265	0.202167	0.41031	0.162634	0.224888	UP_TGF
ANXA3	2	57.4735	1.25678	0.402165	3.12504	0.00177784	0.00570715	0.0190999	0.144156	0.102644	0.7341	UP_TGF
CENPU	2	126.279	0.848623	0.27206	3.11925	0.00181313	0.00580865	0.0436673	0.0166267	0.077225	0.862481	UP_TGF
KIAA0930	2	1990.36	0.565879	0.18144	3.11882	0.00181577	0.00581517	0.017467	0.233686	0.392274	0.356573	UP_TGF
NT5M	2	82.2022	1.02115	0.327991	3.11336	0.00184972	0.00591112	0.00139705	0.403602	0.315854	0.279147	UP_TGF
LMBRD1	2	852.04	0.517336	0.166178	3.11315	0.00185101	0.0059141	0.165324	0.375775	0.168959	0.289942	UP_TGF
PHF7	2	149.678	0.729757	0.234437	3.11281	0.00185317	0.00591868	0.126341	0.389101	0.106168	0.37839	UP_TGF
UBR1	2	1099.48	-0.545019	0.175349	-3.10819	0.00188235	0.00599894	0.0291349	0.405121	0.0305534	0.535191	UP_BMP
ZNF507	2	809.759	-0.492127	0.158352	-3.1078	0.00188485	0.00600572	0.144748	0.147805	0.195812	0.511635	UP_BMP
LEAP2	2	54.831	1.06829	0.343777	3.1075	0.0018868	0.00601076	0.237455	0.352982	0.0285357	0.381027	UP_TGF
TBC1D19	2	189.789	-0.842303	0.271791	-3.09908	0.00194123	0.00616609	0.127823	0.106652	0.3662	0.399325	UP_BMP
COL25A1	2	861.596	0.985469	0.318271	3.09632	0.00195937	0.00621665	0.0817155	0.392188	0.0865953	0.439501	UP_TGF
PRSS27	2	182.133	0.839623	0.271241	3.09549	0.00196489	0.00623273	0.217178	0.1535	0.131717	0.497605	UP_TGF
TRERF1	2	251.228	0.840678	0.271931	3.09152	0.00199138	0.00631183	0.121594	0.371275	0.0804424	0.426689	UP_TGF
MLF1	2	260.114	-0.626582	0.202747	-3.09046	0.00199848	0.00632697	0.14326	0.118432	0.0738079	0.6645	UP_BMP
ANPEP	2	2285.89	-0.942853	0.30524	-3.08889	0.00200904	0.00635671	0.148651	0.403547	0.296069	0.151733	UP_BMP
MID1IP1	2	1261.25	-0.440749	0.14271	-3.08842	0.00201221	0.00636425	0.133546	0.0551365	0.257519	0.553799	UP_BMP
FAM198B-AS1	2	68.4326	1.46199	0.474599	3.08048	0.00206665	0.00651747	0.0941889	0.178859	0.222973	0.503979	UP_TGF
MARS2	2	88.5085	-1.07112	0.347805	-3.07966	0.0020724	0.00653308	0.169193	0.203073	0.122218	0.505515	UP_BMP
SLC6A12	2	62.9411	-1.221	0.396522	-3.07928	0.002075	0.00653874	0.0326462	0.0140792	0.0921837	0.861091	UP_BMP
POLE3	2	1306.09	-0.63999	0.20802	-3.07657	0.00209394	0.00659077	0.0192677	0.177547	0.065271	0.737914	UP_BMP
ZNF792	2	117.983	0.783236	0.254624	3.07605	0.00209765	0.0065999	0.00676048	0.27418	0.0197718	0.699288	UP_TGF
IGF2BP1	2	1974.68	0.400172	0.130229	3.07282	0.00212046	0.00666653	0.00307643	0.292214	0.1083	0.596409	UP_TGF
GABRE	2	1622.5	1.91853	0.624676	3.07124	0.00213173	0.00669787	0.0489511	0.420812	0.301278	0.228959	UP_TGF
TTLL11	2	163.469	0.943919	0.308054	3.06413	0.00218302	0.00684209	0.155842	0.084342	0.0530247	0.706792	UP_TGF
ARL5A	2	1050.32	0.442537	0.145101	3.04985	0.00228954	0.00714025	0.149489	0.131716	0.29156	0.427234	UP_TGF
THOC6	2	298.813	0.566445	0.185748	3.04953	0.00229201	0.0071452	0.155655	0.231654	0.227041	0.385649	UP_TGF
NDUFS5	2	1709.1	-0.522179	0.171356	-3.04734	0.00230877	0.00719333	0.0761808	0.259884	0.0122763	0.651659	UP_BMP
LPCAT4	2	457.157	0.96835	0.317927	3.04583	0.00232041	0.00722684	0.0707712	0.226605	0.146661	0.555963	UP_TGF
MTA1	2	2673.24	0.510761	0.167714	3.04543	0.00232349	0.00723366	0.216799	0.0559857	0.0759343	0.651281	UP_TGF
ERVK13-1	2	875.222	-0.453675	0.14924	-3.03991	0.00236651	0.00736197	0.0739361	0.0654011	0.132448	0.728215	UP_BMP
PCYOX1L	2	397.244	-0.548532	0.18105	-3.02973	0.00244774	0.00757994	0.312073	0.00015659	0.000382085	0.687389	UP_BMP
PPP1R3G	2	145.92	-0.869548	0.287469	-3.02485	0.0024876	0.0076917	0.0271093	0.19908	0.284391	0.48942	UP_BMP
KCTD4	2	31.6651	1.83745	0.608188	3.02119	0.00251784	0.00777306	0.202929	0.436096	0.11567	0.245305	UP_TGF
MUC5B	2	95.6431	-4.56496	1.51465	-3.01388	0.00257931	0.00793879	0.0561544	0.296228	0.0204605	0.627157	UP_BMP
RFPL1S	2	116.126	0.922525	0.306158	3.01323	0.00258483	0.00795309	0.0932361	0.368454	0.0169372	0.521373	UP_TGF
TTPAL	2	1592.6	-0.528786	0.175591	-3.01146	0.00259992	0.00799349	0.339178	0.000374953	0.0313364	0.62911	UP_BMP
EPHB1	2	40.3693	-1.74427	0.579508	-3.00993	0.00261312	0.00802801	0.237654	0.316301	0.0363794	0.409666	UP_BMP
ZBTB7B	2	1293.45	-0.659888	0.219318	-3.00881	0.00262271	0.00805293	0.169839	0.0902376	0.115301	0.624622	UP_BMP
SACS	2	1326.05	0.610272	0.203001	3.00626	0.00264484	0.00811092	0.00931588	0.0133239	0.279378	0.697983	UP_TGF
EEF2	2	126907	-0.421851	0.140653	-2.99924	0.00270651	0.00826973	0.166783	0.07768	0.189818	0.565719	UP_BMP
ENPP1	2	7874.49	0.681434	0.227485	2.99551	0.00273987	0.0083628	0.0510228	0.229957	0.12556	0.59346	UP_TGF
DUSP7	2	1484.43	-0.5156	0.17285	-2.98293	0.00285501	0.00867628	0.177959	0.00452598	0.222732	0.594783	UP_BMP
GUCY1B2	2	50.2559	-1.18817	0.399172	-2.97659	0.0029147	0.0088412	0.165781	0.104504	0.0922496	0.637465	UP_BMP
SNRK	2	778.596	0.472516	0.158855	2.97451	0.00293455	0.00889325	0.0832192	0.408566	0.208816	0.299399	UP_TGF
RFX1	2	721.114	0.500665	0.16847	2.97183	0.00296028	0.00896278	0.25151	0.170266	0.078043	0.500181	UP_TGF
MTTP	2	52.9716	-1.56649	0.527169	-2.97152	0.00296329	0.00897024	0.140707	0.394319	0.257346	0.207629	UP_BMP
TTC31	2	656.413	0.621662	0.209246	2.97097	0.00296859	0.00898295	0.00886716	5.81022e-05	0.239063	0.752012	UP_TGF
METTL15	2	495.596	-0.615912	0.207822	-2.96366	0.00304005	0.00917872	3.87348e-07	0.350504	0.32918	0.320316	UP_BMP
PITX3	2	17.3509	-2.17126	0.732803	-2.96295	0.00304711	0.00919833	0.189305	0.0819779	0.0428212	0.685896	UP_BMP
ULK4	2	184.644	-0.736673	0.248865	-2.96013	0.0030751	0.00926225	0.112015	0.0754587	0.0930154	0.719511	UP_BMP
SSB	2	2172.1	-0.352623	0.119206	-2.95809	0.00309554	0.0093152	0.030805	0.413461	0.273753	0.28198	UP_BMP
SMARCD3	2	1171.3	0.634435	0.214648	2.9557	0.00311962	0.00937037	0.0194501	0.122286	0.291824	0.56644	UP_TGF
NSMAF	2	924.124	0.484596	0.16398	2.9552	0.00312462	0.00938364	0.21247	0.01323	0.118264	0.656035	UP_TGF
LCMT1-AS2	2	25.31	-1.63212	0.553283	-2.94988	0.003179	0.0095329	0.0572992	0.257971	0.0208516	0.663879	UP_BMP
MBNL2	2	2125.97	0.560156	0.189977	2.94855	0.00319265	0.00956175	0.000889459	0.313266	0.125913	0.559932	UP_TGF
TANC1	2	2513.77	-0.452496	0.154102	-2.93634	0.00332113	0.00989692	0.073982	0.437556	0.0409004	0.447561	UP_BMP
EEA1	2	873.646	-0.611214	0.208368	-2.93334	0.00335334	0.00998225	0.0631102	0.427229	0.0043012	0.50536	UP_BMP
ATP6V1G1	2	2216.4	-0.458367	0.15639	-2.93092	0.00337963	0.0100531	0.140734	0.3318	0.0669691	0.460497	UP_BMP
GNE	2	1707.05	-0.44732	0.15316	-2.92061	0.00349351	0.0103555	0.0389567	0.114682	0.217543	0.628819	UP_BMP
PIH1D2	2	46.8965	-1.39689	0.478783	-2.91758	0.00352763	0.0104476	0.0469994	0.0203162	0.198935	0.73375	UP_BMP
PHB	2	1317.28	-0.62824	0.215636	-2.91342	0.00357488	0.0105684	0.116387	0.317057	0.113096	0.45346	UP_BMP
SDS	2	56.8597	1.16661	0.400941	2.90969	0.00361785	0.0106838	0.195037	0.0192714	0.0982371	0.687454	UP_TGF
ZNF41	2	239.605	0.697763	0.240224	2.90464	0.00367675	0.0108342	0.04015	0.248641	0.029523	0.681686	UP_TGF
CSNK2B	2	93.4132	1.04841	0.36102	2.90402	0.00368408	0.0108538	0.00863596	0.198019	0.410279	0.383066	UP_TGF
IPO9	2	2578.56	0.347463	0.119708	2.90257	0.0037011	0.0109	0.280731	0.000506045	0.214482	0.504281	UP_TGF
TRIM38	2	568.009	-0.464846	0.160258	-2.90062	0.0037243	0.0109545	0.193536	0.349037	0.144146	0.313281	UP_BMP
NAGPA	2	271.822	-0.862418	0.297666	-2.89727	0.00376424	0.011058	0.0946498	0.175161	0.0260063	0.704183	UP_BMP
ATR	2	904.322	0.411259	0.142319	2.8897	0.00385605	0.011291	0.0592919	0.329248	0.311462	0.299997	UP_TGF
SLCO3A1	2	190.833	0.844254	0.292205	2.88925	0.00386157	0.0113052	0.142017	0.257127	0.0288983	0.571957	UP_TGF
TSC2	2	2929.08	0.433429	0.150098	2.88765	0.00388135	0.011361	0.0460556	0.000178373	0.060146	0.89362	UP_TGF
ZNF682	2	117.462	0.780429	0.270332	2.88693	0.00389022	0.0113829	0.153547	0.305709	0.0450613	0.495683	UP_TGF
GBP1	2	25.8608	-2.03063	0.703739	-2.88549	0.00390803	0.0114289	0.00232381	0.108907	0.370696	0.518074	UP_BMP
RABGEF1	2	294.369	0.955425	0.331159	2.88509	0.003913	0.0114413	0.00892709	0.320976	0.15957	0.510528	UP_TGF
ESPNL	2	33.6789	-1.78575	0.619172	-2.88409	0.0039255	0.0114758	0.194967	0.379176	0.0107859	0.415071	UP_BMP
SPOCK3	2	253.097	-1.49141	0.517653	-2.8811	0.00396289	0.0115727	0.0536548	0.0337282	0.369687	0.54293	UP_BMP
FAR2P2	2	303.904	0.908509	0.315558	2.87906	0.00398867	0.0116334	0.183519	0.00105679	0.235639	0.579785	UP_TGF
RMDN1	2	1207.94	-0.428667	0.148965	-2.87764	0.00400664	0.0116733	0.0190823	0.141204	0.368922	0.470792	UP_BMP
ASPA	2	88.9257	-0.83785	0.291558	-2.8737	0.00405694	0.0118071	0.0983681	0.177128	0.132073	0.59243	UP_BMP
C12orf66	2	152.902	-0.689352	0.240628	-2.8648	0.00417275	0.0121247	0.2249	0.0986341	0.135312	0.541154	UP_BMP
GPR137C	2	112.239	-0.858895	0.299879	-2.86414	0.0041815	0.0121458	0.156695	0.125625	0.373606	0.344074	UP_BMP
CACTIN-AS1	2	29.1871	1.53318	0.535342	2.86393	0.00418417	0.0121471	0.0356029	0.0956783	0.127565	0.741154	UP_TGF
CRIP3	2	12.9614	2.37	0.827502	2.86404	0.00418278	0.0121471	0.123183	0.0975236	0.228379	0.550915	UP_TGF
INIP	2	445.222	-0.443721	0.154987	-2.86296	0.00419704	0.0121779	0.100929	0.174497	0.0522484	0.672326	UP_BMP
TFCP2L1	2	271.371	-1.09024	0.381092	-2.86082	0.00422547	0.0122473	0.0539654	0.308818	0.246586	0.390631	UP_BMP
IL10	2	21.503	1.59286	0.556872	2.86036	0.00423156	0.0122606	0.0760118	0.00314219	0.213111	0.707735	UP_TGF
SIAH1	2	616.679	0.493227	0.172558	2.85833	0.00425875	0.0123219	0.265427	0.298809	0.0609897	0.374774	UP_TGF
SLC50A1	2	1129.76	-0.406812	0.143013	-2.84458	0.00444701	0.0128188	0.119	0.159972	0.236806	0.484222	UP_BMP
RABEP2	2	413.641	0.56579	0.198994	2.84326	0.00446553	0.0128676	0.185162	0.168734	0.204794	0.44131	UP_TGF
LTB4R	2	768.488	0.563523	0.198497	2.83895	0.00452621	0.0130286	0.082951	0.0112991	0.289374	0.616376	UP_TGF
LMO7-AS1	2	34.1391	1.25434	0.441846	2.83886	0.00452747	0.01303	0.137655	0.310302	0.0201333	0.53191	UP_TGF
TAF1C	2	1077.4	0.484323	0.170899	2.83396	0.00459744	0.013208	0.169879	0.00944704	0.29115	0.529524	UP_TGF
CHD1L	2	1025.92	-0.477887	0.168685	-2.83302	0.00461106	0.0132355	0.236991	0.0512727	0.0855729	0.626164	UP_BMP
CD58	2	162.415	0.778757	0.274932	2.83254	0.00461794	0.0132508	0.0120411	0.326652	0.0349602	0.626346	UP_TGF
DDX50	2	1353.54	0.424398	0.149953	2.8302	0.00465194	0.013334	0.0439381	0.108865	0.0767187	0.770478	UP_TGF
CTSC	2	516.238	0.9919	0.350627	2.82893	0.00467032	0.013375	0.00590316	0.418841	0.34988	0.225376	UP_TGF
GCLM	2	594.141	-0.542279	0.191878	-2.82616	0.004711	0.0134749	0.169542	0.00344619	0.285615	0.541397	UP_BMP
PAPOLG	2	549.503	0.590087	0.208856	2.82533	0.00472312	0.0135048	0.0292816	0.0790568	0.110897	0.780764	UP_TGF
EEF2KMT	2	308.184	-0.843722	0.298913	-2.82263	0.00476312	0.0136062	0.142518	0.00163959	0.149904	0.705938	UP_BMP
RTN4IP1	2	107.201	-0.757439	0.268422	-2.82182	0.00477515	0.0136368	0.16051	0.292686	0.0487131	0.498091	UP_BMP
NT5DC3	2	750.002	0.766756	0.271797	2.82106	0.00478657	0.0136653	0.0249586	0.115306	0.00087697	0.858859	UP_TGF
TLCD1	2	132.376	-0.998728	0.355	-2.81331	0.00490336	0.0139468	0.0715782	0.166427	0.385298	0.376697	UP_BMP
C2orf68	2	1463.9	0.448886	0.15957	2.81309	0.00490677	0.0139516	0.307147	0.0485206	0.0502067	0.594126	UP_TGF
AP2A2	2	2725.74	-0.367448	0.130763	-2.81003	0.00495365	0.0140702	0.0482001	0.127631	0.10053	0.72364	UP_BMP
DDX60	2	65.223	1.37874	0.491901	2.80289	0.00506474	0.0143482	0.102628	0.0296889	0.157801	0.709881	UP_TGF
CCDC51	2	243.842	-0.679571	0.24252	-2.80213	0.00507672	0.0143746	0.00469322	0.0528001	0.329119	0.613388	UP_BMP
BUB1B	2	254.51	1.07017	0.38201	2.80141	0.00508799	0.0144015	0.306332	0.260965	0.180024	0.252679	UP_TGF
TRPV1	2	318.986	0.674944	0.241509	2.79469	0.00519498	0.0146759	0.224282	0.000622269	0.217119	0.557976	UP_TGF
ERI2	2	345.493	-0.575664	0.206109	-2.79301	0.00522195	0.0147423	0.0729687	0.18456	0.145772	0.596699	UP_BMP
CCT7	2	3897.29	-0.520652	0.186419	-2.79291	0.0052236	0.0147444	0.275772	0.334115	0.0814147	0.308699	UP_BMP
IGSF9B	2	609.247	0.76715	0.274777	2.7919	0.00523999	0.0147881	0.0816228	0.0678533	0.0670022	0.783522	UP_TGF
UCN	2	31.1389	1.59599	0.572326	2.78861	0.0052935	0.0149184	0.263198	0.298243	0.121651	0.316907	UP_TGF
NFE2L2	2	1336.73	0.425673	0.152698	2.78767	0.0053088	0.0149564	0.0135962	0.105205	0.037665	0.843534	UP_TGF
C1orf158	2	56.2828	-1.26151	0.453001	-2.78478	0.00535635	0.0150695	0.0361006	0.130184	0.377162	0.456553	UP_BMP
EPHX1	2	652.098	-0.771526	0.277335	-2.78193	0.00540365	0.0151842	0.0753804	0.0286742	0.321246	0.574699	UP_BMP
JDP2	2	2177.87	0.509986	0.183706	2.77611	0.00550144	0.0154165	0.0947563	0.00226147	0.168033	0.734949	UP_TGF
TRIM59	2	368.23	0.662013	0.239134	2.76838	0.00563364	0.0157356	0.0216967	0.256139	0.0394565	0.682708	UP_TGF
TIGD4	2	16.3968	-1.80597	0.65355	-2.76331	0.00572176	0.0159489	0.26878	0.369232	0.0627379	0.29925	UP_BMP
AGPAT4	2	951.854	0.739075	0.267993	2.75781	0.00581894	0.0161893	0.134102	0.0769713	0.0322022	0.756725	UP_TGF
AKT1S1	2	1725.39	-0.525696	0.190644	-2.75748	0.00582487	0.0162031	0.249416	0.00873931	0.130978	0.610867	UP_BMP
PYGM	2	133.025	-0.69648	0.252606	-2.75718	0.00583016	0.0162104	0.0248649	0.451053	0.257719	0.266364	UP_BMP
RNF182	2	57.1904	1.54632	0.56097	2.75651	0.00584221	0.0162402	0.16742	0.0260076	0.117691	0.688882	UP_TGF
SH3TC2	2	91.0906	-0.85384	0.310122	-2.75324	0.00590087	0.0163698	0.166027	0.0610636	0.271621	0.501288	UP_BMP
MTMR7	2	66.4341	1.25049	0.454237	2.75295	0.00590612	0.0163815	0.0938253	0.0158835	0.324805	0.565486	UP_TGF
TRAM1L1	2	101.326	0.88896	0.323121	2.75117	0.00593827	0.0164623	0.0708721	0.354303	0.0595354	0.515289	UP_TGF
FANCI	2	391.241	0.706089	0.256679	2.75087	0.00594379	0.016472	0.00923632	0.461492	0.234683	0.294588	UP_TGF
ZNF721	2	794.815	-0.45443	0.165308	-2.74899	0.00597794	0.0165526	0.144844	0.0922749	0.22197	0.540911	UP_BMP
C9orf40	2	137.467	-0.636295	0.231506	-2.7485	0.00598678	0.0165742	0.189724	0.0105026	0.102559	0.697213	UP_BMP
ST7-AS1	2	62.3574	0.884352	0.32284	2.73929	0.00615721	0.0169941	0.0984584	0.132635	0.0602121	0.708694	UP_TGF
CDC7	2	193.588	0.703114	0.256916	2.73675	0.00620498	0.0171173	0.280274	0.148256	0.0649364	0.506534	UP_TGF
TMEM98	2	1507.29	0.63668	0.232873	2.73402	0.00625656	0.017242	0.00238577	0.305085	0.110095	0.582435	UP_TGF
EDEM3	2	1878.29	-0.355916	0.130352	-2.73042	0.00632541	0.0174141	0.0790508	0.310945	0.269648	0.340356	UP_BMP
DCLK2	2	188.901	0.650477	0.238294	2.72973	0.00633865	0.0174447	0.018197	0.245309	0.0590642	0.67743	UP_TGF
AADAT	2	385.007	-0.570411	0.209231	-2.72622	0.00640634	0.0176131	0.195679	0.0911465	0.149407	0.563768	UP_BMP
CCDC34	2	647.349	-0.619659	0.228009	-2.71769	0.00657386	0.0180311	0.140147	0.265033	0.0615352	0.533285	UP_BMP
MGME1	2	412.12	0.563099	0.207265	2.71681	0.00659147	0.0180642	0.102229	0.272332	0.131406	0.494033	UP_TGF
TRIB1	2	258.225	-0.86015	0.316742	-2.71562	0.00661525	0.0181141	0.0871474	0.380464	0.323738	0.20865	UP_BMP
USP22	2	7963.72	-0.376124	0.138725	-2.71129	0.00670211	0.0183151	0.0710627	0.00252518	0.123199	0.803213	UP_BMP
DYNC2LI1	2	455.201	0.528975	0.195182	2.71016	0.00672511	0.0183687	0.0931127	0.056956	0.227453	0.622478	UP_TGF
GPR143	2	43.6759	-1.53553	0.567098	-2.70769	0.00677531	0.0184934	0.199138	0.252664	0.0918249	0.456373	UP_BMP
PEA15	2	2446.35	0.491651	0.181663	2.70639	0.00680191	0.0185629	0.254067	0.243568	0.0138086	0.488557	UP_TGF
NT5C3A	2	173.689	0.700015	0.258805	2.7048	0.00683461	0.0186427	0.0808698	0.247608	0.0531156	0.618406	UP_TGF
TUBGCP6	2	2136.07	0.471276	0.174353	2.703	0.00687172	0.0187346	0.154973	0.40722	0.234936	0.20287	UP_TGF
B4GALT3	2	1109.04	-0.431653	0.159721	-2.70254	0.00688109	0.0187476	0.133902	0.103781	0.238239	0.524078	UP_BMP
TTLL7	2	292.283	-0.591244	0.219133	-2.6981	0.00697358	0.018971	0.256645	0.23435	0.0456783	0.463326	UP_BMP
GSKIP	2	230.465	-0.530764	0.196743	-2.69775	0.00698091	0.0189878	0.183232	0.177034	0.215835	0.423899	UP_BMP
FOXO1	2	2591.81	-0.462491	0.171502	-2.6967	0.00700301	0.0190416	0.126095	0.204031	0.0857275	0.584146	UP_BMP
ZXDA	2	172.521	-0.805756	0.298939	-2.69538	0.0070308	0.0191044	0.143542	0.269687	0.00461782	0.582153	UP_BMP
EIF2AK3	2	1586.01	-0.379747	0.140983	-2.69356	0.00706938	0.0191996	0.176079	0.00176644	0.331441	0.490714	UP_BMP
TAF1A-AS1	2	48.4865	-0.997561	0.370756	-2.69061	0.00713212	0.0193345	0.241179	0.0584918	0.116764	0.583566	UP_BMP
ZNF300	2	255.718	0.501007	0.186435	2.68731	0.00720309	0.019501	0.134443	0.256233	0.025723	0.583601	UP_TGF
RRN3	2	1242.7	-0.439454	0.16359	-2.68631	0.00722451	0.0195525	0.0189984	0.268578	0.222192	0.490232	UP_BMP
FBXO31	2	883.149	-0.574118	0.214214	-2.68012	0.00735956	0.0198817	0.0508383	0.155995	0.321825	0.471342	UP_BMP
PTTG1IP	2	10576.6	0.615769	0.229773	2.67991	0.00736426	0.0198878	0.162852	0.377844	0.0470227	0.412281	UP_TGF
MIER3	2	465.072	-0.488702	0.182499	-2.67783	0.00740998	0.0200013	0.0302175	0.135432	0.266587	0.567764	UP_BMP
DALRD3	2	425.766	0.44846	0.167604	2.67571	0.00745714	0.0201153	0.0987423	0.421455	0.0322713	0.447531	UP_TGF
GPR39	2	17.5182	1.6985	0.635551	2.67249	0.00752905	0.0202824	0.252645	0.216295	0.0703501	0.46071	UP_TGF
NCKIPSD	2	572.26	0.710476	0.266217	2.66879	0.00761246	0.0204699	0.0773733	0.344959	0.220088	0.35758	UP_TGF
SLC17A9	2	1627.81	-0.573078	0.215347	-2.66118	0.00778672	0.0208833	0.0512727	0.258368	0.373631	0.316729	UP_BMP
PSMD7	2	2056.56	-0.357022	0.134167	-2.66103	0.00779025	0.0208889	0.145555	0.25802	0.24152	0.354904	UP_BMP
DBI	2	1716.65	0.489435	0.184218	2.65683	0.00788796	0.0211235	0.035071	0.000216719	0.217497	0.747215	UP_TGF
TRAF3	2	1097.74	0.467486	0.176037	2.65561	0.0079165	0.0211896	0.111964	0.0810052	0.242466	0.564565	UP_TGF
UBE2J1	2	1908.15	0.340574	0.128409	2.65227	0.00799519	0.0213721	0.0258347	0.296613	0.261668	0.415884	UP_TGF
MPP3	2	224.721	0.587746	0.222289	2.64406	0.0081917	0.0218329	0.142581	0.0598679	0.317096	0.480455	UP_TGF
LNP1	2	151.599	0.797129	0.301677	2.64233	0.00823382	0.0219344	0.0904837	0.039391	0.131134	0.738991	UP_TGF
MPRIP	2	6426.8	-0.51659	0.195549	-2.64175	0.00824791	0.0219648	0.276508	0.13449	0.0772532	0.511748	UP_BMP
SGO2	2	290.574	0.472267	0.178794	2.6414	0.00825634	0.02198	0.0176432	0.215024	0.237809	0.529524	UP_TGF
REEP5	2	2385.2	-0.414755	0.15712	-2.63974	0.00829709	0.0220736	0.062683	0.0760752	0.180337	0.680905	UP_BMP
KDM5B	2	4127.56	0.484421	0.183827	2.6352	0.00840872	0.0223455	0.191098	0.322943	0.101178	0.384782	UP_TGF
TBC1D31	2	194.719	-0.744955	0.282931	-2.63299	0.00846368	0.0224806	0.0210467	0.152905	0.298158	0.527891	UP_BMP
MAP3K9	2	156.37	-0.72667	0.276383	-2.62921	0.00855827	0.0226986	0.0733251	0.214444	0.000883284	0.711348	UP_BMP
ACOT11	2	1012.94	0.557333	0.212545	2.62218	0.00873682	0.0231194	0.194144	0.0695	0.172125	0.564231	UP_TGF
COX20	2	891.861	0.533187	0.203371	2.62175	0.00874799	0.0231377	0.150714	0.138086	0.00113429	0.710065	UP_TGF
SLC13A4	2	86.1522	1.36568	0.521539	2.61856	0.00883026	0.0233213	0.166689	0.360616	0.0775607	0.395135	UP_TGF
ABHD2	2	3372.62	-0.605373	0.231307	-2.61718	0.00886591	0.0233889	0.0480127	0.0488642	0.0949773	0.808146	UP_BMP
POLR2F	2	617.277	-0.525657	0.200936	-2.61604	0.00889573	0.0234486	0.0499651	0.248906	0.393205	0.307924	UP_BMP
HIBADH	2	687.198	-0.481093	0.184307	-2.61028	0.00904694	0.0237933	0.0758334	0.304328	0.0691116	0.550727	UP_BMP
NCALD	2	1133.15	0.554418	0.21249	2.60915	0.00907684	0.0238642	0.112992	0.246453	0.283588	0.356968	UP_TGF
TPI1	2	8120.01	0.637062	0.244223	2.60853	0.00909327	0.0238959	0.0710567	0.219458	0.0489842	0.660501	UP_TGF
PDIK1L	2	125.569	0.887895	0.340763	2.60561	0.00917115	0.0240811	0.0280225	0.0395864	0.360809	0.571582	UP_TGF
TCTN1	2	1775.15	0.38272	0.146938	2.60465	0.00919694	0.0241372	0.069085	0.200484	0.0386774	0.691754	UP_TGF
KRT8	2	1249.77	-0.419119	0.161094	-2.60171	0.00927603	0.0242973	0.0732143	0.17483	0.358198	0.393759	UP_BMP
UBR5	2	3668.99	0.506975	0.194862	2.60171	0.009276	0.0242973	0.0291378	0.0281173	0.130182	0.812563	UP_TGF
HSP90B1	2	21019.8	0.335225	0.129004	2.59856	0.00936152	0.0244767	0.0755697	0.222987	0.00834942	0.693094	UP_TGF
ARFGEF1	2	2077.77	-0.420819	0.161955	-2.59837	0.00936668	0.0244841	0.0700547	0.210737	0.322899	0.396309	UP_BMP
ZNF829	2	311.054	0.457498	0.17639	2.59367	0.00949565	0.0247775	0.0911349	0.411776	0.305066	0.192023	UP_TGF
PLEKHA8P1	2	49.1082	1.07237	0.413971	2.59046	0.00958476	0.024978	0.16367	0.361606	0.158641	0.316083	UP_TGF
MTERF4	2	1201.06	-0.4656	0.179998	-2.5867	0.0096901	0.0252162	0.0771662	0.0922611	0.0893077	0.741265	UP_BMP
UBE2E3	2	1295.94	0.341566	0.1324	2.5798	0.00988568	0.0256678	0.01523	0.152835	0.0112223	0.820713	UP_TGF
NDUFB2	2	1062.69	-0.481467	0.187403	-2.56915	0.0101947	0.0263904	0.145653	0.0949032	0.168813	0.59063	UP_BMP
CNPY4	2	1018.47	0.440293	0.171424	2.56844	0.0102157	0.0264363	0.0157371	0.155854	0.102162	0.726246	UP_TGF
FNTA	2	1670.89	0.332538	0.129663	2.56464	0.0103282	0.0266893	0.102408	0.172191	0.287922	0.437479	UP_TGF
MYO9A	2	2572.39	-0.561592	0.219005	-2.56429	0.0103388	0.0267058	0.0697224	0.178365	0.00537347	0.746539	UP_BMP
PTK2	2	3833	-0.293112	0.114419	-2.56175	0.0104147	0.0268872	0.000200172	0.0881325	0.104793	0.806875	UP_BMP
POP1	2	217.957	-0.897032	0.350726	-2.55764	0.0105384	0.0271592	0.276602	0.134031	0.0134502	0.575917	UP_BMP
FAR2	2	21.5565	1.39086	0.545238	2.55091	0.0107441	0.0275923	0.14404	0.348109	0.0976229	0.410229	UP_TGF
OXNAD1	2	214.805	-0.593711	0.232899	-2.54922	0.0107965	0.0277149	0.118289	0.183726	0.231718	0.466267	UP_BMP
DEGS1	2	2379.32	0.401518	0.157535	2.54875	0.0108111	0.0277479	0.017243	0.186089	0.121762	0.674905	UP_TGF
FAM66D	2	85.1907	-0.837748	0.329309	-2.54396	0.0109604	0.0280913	0.071392	0.13919	0.243636	0.545782	UP_BMP
NCAPH2	2	686.534	0.468143	0.18408	2.54315	0.0109858	0.028152	0.136001	0.0865112	0.112899	0.664589	UP_TGF
LPIN3	2	675.724	-0.443473	0.174488	-2.54157	0.0110356	0.0282554	0.021289	0.154805	0.151729	0.672177	UP_BMP
LMF2	2	2357.91	0.392508	0.154607	2.53875	0.0111249	0.0284413	0.0609444	0.184971	0.051722	0.702362	UP_TGF
YRDC	2	476.007	-0.488703	0.192536	-2.53825	0.011141	0.0284735	0.0683302	0.309952	0.0826537	0.539064	UP_BMP
HELLS	2	288.16	0.500759	0.197346	2.53746	0.0111659	0.0285283	0.0665708	0.169201	0.0336553	0.730572	UP_TGF
ZNF780A	2	289.212	-0.570147	0.224711	-2.53724	0.011173	0.0285329	0.0268922	0.00148451	0.194173	0.77745	UP_BMP
PRAF2	2	953.692	0.428972	0.169292	2.53392	0.0112795	0.0287599	0.159968	0.0788169	0.141043	0.620172	UP_TGF
SIN3A	2	1749.33	0.319998	0.126435	2.53092	0.0113763	0.0289704	0.227564	0.332121	0.183747	0.256568	UP_TGF
LINC01588	2	140.438	0.758364	0.300068	2.52731	0.011494	0.0292245	0.0581025	0.395518	0.0147349	0.531645	UP_TGF
USP13	2	960.001	-0.393021	0.155507	-2.52734	0.0114929	0.0292245	0.199884	0.0074356	0.233955	0.558725	UP_BMP
KIF14	2	166.745	0.838628	0.332108	2.52517	0.0115642	0.029371	0.0077437	0.128927	0.323084	0.540246	UP_TGF
FER1L4	2	597.621	1.9513	0.773279	2.52341	0.0116222	0.0294999	0.178155	0.0448026	0.0192303	0.757812	UP_TGF
CGN	2	24.9415	1.40279	0.556636	2.52012	0.0117315	0.0297495	0.0614577	0.0679469	0.10102	0.769575	UP_TGF
MIF-AS1	2	106.27	0.697192	0.276681	2.51984	0.0117408	0.0297661	0.128593	0.0720847	0.142806	0.656516	UP_TGF
CCDC32	2	646.717	-0.385508	0.153027	-2.51921	0.0117619	0.0298034	0.164648	0.19386	0.225084	0.416408	UP_BMP
C3orf52	2	78.4083	-0.844679	0.335355	-2.51876	0.0117769	0.0298369	0.14521	0.38419	0.0452918	0.425308	UP_BMP
NPLOC4	2	5744.33	0.366333	0.1455	2.51775	0.0118106	0.0299036	0.00226394	0.20275	0.0164521	0.778534	UP_TGF
ADRB2	2	169.747	0.838353	0.333573	2.51325	0.0119625	0.0302365	0.0213265	0.0436626	0.380555	0.554456	UP_TGF
EN2	2	13.8535	1.70972	0.680409	2.51278	0.0119785	0.0302675	0.151254	0.206521	0.0783565	0.563868	UP_TGF
PRPF4B	2	2027.25	0.333733	0.133247	2.50462	0.0122584	0.0308791	0.247467	0.00175947	0.167193	0.583581	UP_TGF
ARAP2	2	44.2473	1.4968	0.598374	2.50144	0.0123688	0.0311092	0.0153029	0.159758	0.0853074	0.739632	UP_TGF
TGFA	2	101.107	-0.927988	0.371143	-2.50035	0.012407	0.0311954	0.197551	0.354669	0.064069	0.383711	UP_BMP
ENKUR	2	21.1783	1.49263	0.598375	2.49447	0.0126145	0.0316684	0.0186765	0.427972	0.368302	0.18505	UP_TGF
SSBP1	2	1252.26	-0.456573	0.183132	-2.49314	0.012662	0.0317731	0.124535	0.0434766	0.178588	0.653401	UP_BMP
MRPL4	2	679.181	-0.531178	0.213187	-2.4916	0.0127168	0.0318958	0.0336562	0.0249199	0.240079	0.701345	UP_BMP
METTL5	2	520.436	-0.412155	0.165472	-2.49079	0.012746	0.031964	0.000185704	0.095751	0.219431	0.684632	UP_BMP
KIF3A	2	728.799	-0.565404	0.227486	-2.48544	0.012939	0.0324132	0.0252198	0.148642	0.265089	0.561049	UP_BMP
KATNB1	2	407.959	-0.66474	0.26762	-2.48389	0.0129955	0.0325206	0.0487453	0.348204	0.309704	0.293347	UP_BMP
C9orf50	2	16.2146	1.81807	0.733142	2.47984	0.0131442	0.0328413	0.0136076	0.439158	0.226481	0.320753	UP_TGF
CCDC167	2	193.653	-0.679813	0.274175	-2.47948	0.0131574	0.0328679	0.278194	0.275147	0.137481	0.309178	UP_BMP
CHID1	2	2188.54	-0.478996	0.193589	-2.4743	0.0133497	0.0332951	0.214503	0.267172	0.155395	0.36293	UP_BMP
HSPA12B	2	23.9334	1.66968	0.675291	2.47253	0.0134159	0.0334383	0.11375	0.0524626	0.142213	0.691575	UP_TGF
GATA2	2	295.201	-0.69035	0.279241	-2.47224	0.013427	0.0334606	0.0578995	0.00130854	0.150631	0.790161	UP_BMP
DNAJC6	2	80.9169	-1.34222	0.543242	-2.47075	0.0134828	0.0335742	0.00229111	0.0408257	0.339612	0.617271	UP_BMP
CDC20	2	240.257	0.903703	0.366166	2.46801	0.0135865	0.0338106	0.304117	0.000921362	0.0530469	0.641915	UP_TGF
TIMM50	2	679.919	-0.606055	0.245706	-2.46658	0.0136409	0.0339159	0.185003	0.0106924	0.208857	0.595448	UP_BMP
ZNF330	2	739.743	-0.391264	0.158782	-2.46417	0.0137332	0.0341143	0.0942719	0.127589	0.0241324	0.754007	UP_BMP
LRP2BP	2	82.3416	0.838006	0.340211	2.4632	0.0137704	0.0341961	0.126241	0.177997	0.129888	0.565874	UP_TGF
NRSN2-AS1	2	66.8513	0.846206	0.343712	2.46197	0.0138178	0.034293	0.258584	1.43847e-05	0.0374372	0.703964	UP_TGF
CCDC144B	2	151.044	0.879509	0.358266	2.45491	0.0140921	0.0348836	0.00368184	0.104232	0.0894498	0.802636	UP_TGF
NDUFAF1	2	394.509	-0.539374	0.219741	-2.45459	0.0141043	0.0349085	0.127877	0.00565053	0.105679	0.760794	UP_BMP
CEP55	2	209.659	0.752012	0.306482	2.45369	0.01414	0.0349808	0.00637153	0.184265	0.306492	0.502871	UP_TGF
CNN2	2	1836.37	0.466956	0.190454	2.4518	0.0142142	0.0351508	0.037088	0.442256	0.234219	0.286437	UP_TGF
CD9	2	1742.14	0.646655	0.264014	2.44933	0.0143124	0.0353601	0.195368	0.0147447	0.0611616	0.728726	UP_TGF
S100A3	2	13.6959	2.36776	0.966705	2.44931	0.0143129	0.0353601	0.224714	0.349937	0.106205	0.319144	UP_TGF
MAP3K2	2	2076.91	-0.436453	0.17824	-2.44868	0.0143379	0.0354113	0.0566335	0.215347	0.225452	0.502567	UP_BMP
MYO1F	2	28.9482	-1.37188	0.560405	-2.44801	0.0143648	0.0354724	0.193572	0.299456	0.20279	0.304182	UP_BMP
NPTXR	2	688.612	0.588485	0.240896	2.4429	0.0145697	0.0359184	0.204226	0.41646	0.134539	0.244775	UP_TGF
SAPCD1	2	24.1825	1.38831	0.569585	2.43741	0.0147929	0.0363977	0.142714	0.302892	0.0860135	0.468381	UP_TGF
FARSB	2	863.224	-0.489728	0.201181	-2.43426	0.0149223	0.0366517	0.00935839	0.38259	0.236466	0.371585	UP_BMP
C4A	2	202.206	1.17099	0.482445	2.4272	0.0152159	0.0372748	0.00190877	0.464754	0.232665	0.300673	UP_TGF
TMUB1	2	710.686	0.398484	0.164182	2.42709	0.0152204	0.0372801	0.0303224	0.159944	0.24416	0.565573	UP_TGF
TMEM179B	2	689.26	-0.489102	0.201902	-2.42247	0.0154153	0.0377065	0.124254	0.00142083	0.131155	0.74317	UP_BMP
GTF2E2	2	796.798	-0.363964	0.150419	-2.41966	0.0155352	0.0379712	0.12847	0.111553	0.198239	0.561737	UP_BMP
ANKHD1	2	3687.27	0.320822	0.132651	2.41855	0.0155827	0.0380646	0.00855615	0.243772	0.225451	0.522221	UP_TGF
WFIKKN1	2	25.1735	1.27201	0.525959	2.41847	0.015586	0.0380668	0.104427	0.117892	0.399718	0.377964	UP_TGF
WDR48	2	958.838	-0.408181	0.16888	-2.417	0.0156492	0.0382098	0.0217435	0.181526	0.205562	0.591168	UP_BMP
RHPN2	2	73.3715	0.783695	0.324397	2.41585	0.0156986	0.0383189	0.12181	0.0161324	0.210915	0.651143	UP_TGF
KRT17	2	115.829	1.35231	0.56102	2.41046	0.0159325	0.0388326	0.118796	0.40527	0.190496	0.285438	UP_TGF
SPAG1	2	79.529	0.781117	0.324819	2.40477	0.0161826	0.0393764	0.0201674	0.317024	0.171907	0.490902	UP_TGF
APTX	2	638.727	-0.356641	0.148371	-2.40371	0.0162296	0.0394791	0.0454975	0.403686	0.24361	0.307206	UP_BMP
OSR1	2	18.2091	-1.46686	0.611461	-2.39894	0.0164424	0.0399074	0.167426	0.122148	0.0511787	0.659247	UP_BMP
NOP10	2	976.069	-0.420013	0.175179	-2.39762	0.0165018	0.0400355	0.0713039	0.038345	0.076473	0.813878	UP_BMP
FGD6	2	309.981	0.565541	0.235937	2.397	0.0165299	0.04009	0.0504834	0.363417	0.00766581	0.578434	UP_TGF
PNKD	2	559.207	-0.414267	0.172983	-2.39485	0.0166272	0.0402719	0.0599629	0.093385	0.322891	0.523761	UP_BMP
ZIC5	2	82.7143	0.909252	0.380448	2.38995	0.0168507	0.0407648	0.0189338	0.429378	0.30011	0.251578	UP_TGF
SLFN12	2	128.364	-0.646268	0.271921	-2.37668	0.0174693	0.0420615	0.0201432	0.277082	0.137485	0.56529	UP_BMP
SMIM14	2	870.984	-0.456321	0.192357	-2.37226	0.0176797	0.0425054	0.0412836	0.0251232	0.0470538	0.886539	UP_BMP
ADIPOR1	2	4170.32	-0.294654	0.124305	-2.37041	0.0177685	0.0426931	0.132534	0.121992	0.1224	0.623075	UP_BMP
FLII	2	4046.13	0.437657	0.184837	2.36781	0.0178939	0.0429481	0.115746	0.294358	0.0628517	0.527045	UP_TGF
SHISA5	2	1886.01	0.358892	0.151581	2.36766	0.0179009	0.0429481	0.0420269	0.280028	0.273996	0.40395	UP_TGF
TRAM1	2	4435.59	0.442083	0.186717	2.36766	0.017901	0.0429481	0.146495	0.0166627	0.356123	0.480719	UP_TGF
ADI1	2	1782.49	-0.699008	0.295278	-2.36729	0.0179188	0.0429764	0.146565	0.212856	0.167616	0.472962	UP_BMP
DROSHA	2	1270.91	0.379199	0.160196	2.3671	0.0179282	0.0429823	0.190889	0.40289	0.186951	0.21927	UP_TGF
SAP30BP	2	1096.42	0.3694	0.15626	2.36401	0.0180782	0.0433037	0.235956	0.114055	0.018342	0.631647	UP_TGF
MIER1	2	764.145	0.368447	0.15627	2.35775	0.0183859	0.0439503	0.0319175	0.155801	0.424476	0.387805	UP_TGF
CD46	2	4435.93	0.3414	0.144841	2.35706	0.0184201	0.0440192	0.247782	0.241828	0.0850221	0.425368	UP_TGF
OCA2	2	251.03	-0.959506	0.407397	-2.35521	0.0185123	0.0441941	0.168335	0.0910285	0.370218	0.370418	UP_BMP
CYP19A1	2	24.4216	-2.50127	1.06257	-2.35398	0.0185735	0.0442851	0.236715	0.0140004	0.107439	0.641845	UP_BMP
P4HA2	2	6842.29	0.516413	0.219789	2.34958	0.0187944	0.0447104	0.0274781	0.00450832	0.262061	0.705952	UP_TGF
LARP1B	2	448.515	0.49578	0.211425	2.34494	0.0190301	0.0451722	0.200492	0.197082	0.0137156	0.58871	UP_TGF
EPS15L1	2	839.471	0.334594	0.142955	2.34056	0.019255	0.0456721	0.258063	0.00642294	0.0116029	0.723911	UP_TGF
SLITRK4	2	323.428	0.535889	0.229035	2.33977	0.0192955	0.0457556	0.105776	0.381239	0.105063	0.407922	UP_TGF
SNCG	2	30.7634	-1.0907	0.466468	-2.33821	0.0193763	0.0459205	0.156065	0.276737	0.0201355	0.547063	UP_BMP
SEMA6A	2	1848.8	0.468667	0.200575	2.33662	0.019459	0.0460963	0.0213105	0.0982529	0.171846	0.708591	UP_TGF
SMAD7	2	1722.61	-0.397186	0.16999	-2.33653	0.0194638	0.046101	0.0819335	0.17486	0.310832	0.432375	UP_BMP
MOB3A	2	642.7	0.369674	0.158244	2.33611	0.0194856	0.0461326	0.115964	0.0915844	0.410102	0.382349	UP_TGF
JAZF1-AS1	2	23.8255	-1.21698	0.520976	-2.33596	0.0194936	0.0461447	0.0581736	0.233842	0.216139	0.491845	UP_BMP
GRAMD1A	2	1992.77	0.452518	0.19395	2.33317	0.0196393	0.0464627	0.178973	0.385182	0.16221	0.273635	UP_TGF
MIR3936HG	2	88.4812	-0.740448	0.317477	-2.33229	0.0196853	0.0465512	0.180667	0.00130583	0.215953	0.602075	UP_BMP
SOX12	2	1889	0.347538	0.149158	2.33	0.0198062	0.0468167	0.0272722	0.110866	0.0950069	0.766855	UP_TGF
THAP11	2	569.996	0.401836	0.172687	2.32696	0.0199676	0.0471211	0.0477803	0.135984	0.181544	0.634691	UP_TGF
SIL1	2	1469.22	-0.425684	0.183099	-2.32488	0.0200785	0.047323	0.00325142	0.195907	0.439399	0.361442	UP_BMP
RNF8	2	653.729	-0.351561	0.151989	-2.31306	0.0207191	0.0486641	0.0512952	0.0355714	0.262373	0.650761	UP_BMP
PSMB9	2	27.0613	2.05949	0.890942	2.31159	0.0208002	0.0488216	0.122665	0.177775	0.30148	0.39808	UP_TGF

## Sheet: supplementary file 4d
gene	clust	baseMean	log2FoldChange	lfcSE	stat	pvalue	padj	ENH_variance	PROM_variance	Unexplained_variance	Combo.Int.variance	DIR
SSC5D	3	4740.31	5.60029	0.144736	38.6932	0	0	0.0477116	0.657978	0.226521	0.0677892	UP_TGF
BGN	3	72521.9	4.37819	0.135521	32.3064	5.68818e-229	1.03007e-225	0.0737729	0.636122	0.0885887	0.201517	UP_TGF
TSPAN18	3	1114.89	-5.846	0.219103	-26.6815	7.71383e-157	7.39529e-154	0.0186521	0.733893	0.143719	0.103736	UP_BMP
SERINC5	3	3240.79	-3.51879	0.138544	-25.3984	2.6248e-142	1.9445e-139	0.0442241	0.476933	0.318182	0.160661	UP_BMP
NRCAM	3	2204.37	-4.89278	0.194585	-25.1447	1.61521e-139	1.14455e-136	0.303118	0.634275	0.0235931	0.0390143	UP_BMP
IHH	3	5636.66	-7.47049	0.314155	-23.7796	5.42614e-125	2.7636e-122	0.0150685	0.511773	0.153618	0.31954	UP_BMP
PCSK6	3	3618.46	-4.5442	0.193727	-23.4567	1.12917e-121	5.41272e-119	0.152089	0.643847	0.104348	0.099716	UP_BMP
VPS13B	3	8554.93	-2.92399	0.125317	-23.3327	2.06603e-120	8.63388e-118	0.00578174	0.58058	0.113874	0.299764	UP_BMP
POSTN	3	306986	5.0239	0.233963	21.473	2.78245e-102	8.72083e-100	0.116155	0.440474	0.428788	0.0145829	UP_TGF
SGMS2	3	6723.88	-4.35071	0.206445	-21.0744	1.36498e-98	3.70775e-96	0.0482197	0.587278	0.108341	0.256162	UP_BMP
C1QTNF5	3	2129.42	3.29235	0.159072	20.6973	3.6652e-95	9.79269e-93	0.0720341	0.571592	0.32284	0.0335335	UP_TGF
COL1A2	3	468773	3.022	0.151528	19.9436	1.7048e-88	3.85901e-86	0.103123	0.653752	0.0723842	0.170741	UP_TGF
STIM1	3	4193.59	-2.5577	0.131701	-19.4205	5.18297e-84	1.04286e-81	0.054739	0.542019	0.394564	0.00867727	UP_BMP
SNORC	3	19429.8	-4.21976	0.218485	-19.3138	4.11466e-83	8.17815e-81	0.325949	0.474065	0.104529	0.0954576	UP_BMP
CAB39	3	5530.3	-2.21865	0.115595	-19.1933	4.20966e-82	8.26615e-80	0.133452	0.503065	0.0339528	0.329531	UP_BMP
FBLN5	3	10580.8	3.1163	0.163926	19.0104	1.39915e-80	2.65154e-78	0.00160645	0.666488	0.088668	0.243237	UP_TGF
GPRC5B	3	1549.3	-3.79364	0.206283	-18.3905	1.56525e-75	2.47674e-73	0.0132638	0.890007	0.00847588	0.0882531	UP_BMP
MTMR9LP	3	502.096	4.8383	0.279343	17.3203	3.30661e-67	4.41731e-65	0.0492022	0.856023	0.00383896	0.0909354	UP_TGF
CAPN14	3	710.735	-6.01388	0.351805	-17.0944	1.63489e-65	2.08168e-63	0.125935	0.813261	0.0286787	0.0321251	UP_BMP
DPT	3	2128.41	4.00511	0.236857	16.9094	3.83562e-64	4.59654e-62	0.34692	0.438167	0.0274891	0.187424	UP_TGF
ST6GALNAC2	3	401.824	-5.23445	0.322381	-16.2369	2.76735e-59	3.00681e-57	0.069574	0.899801	0.0137303	0.0168949	UP_BMP
CDC42EP4	3	1002.55	-2.42449	0.149752	-16.19	5.93353e-59	6.32057e-57	0.0157427	0.635495	0.0200137	0.328749	UP_BMP
COL1A1	3	525988	3.18891	0.197082	16.1806	6.90864e-59	7.31149e-57	0.184906	0.383794	0.378959	0.05234	UP_TGF
PPIF	3	2623.68	-3.49984	0.216316	-16.1793	7.06081e-59	7.42433e-57	0.187155	0.646849	0.0909294	0.0750663	UP_BMP
IGFBP7	3	11438.9	3.35176	0.211039	15.8822	8.41982e-57	8.31674e-55	0.0616532	0.710315	0.114064	0.113968	UP_TGF
VASH1	3	944.206	3.48177	0.224112	15.5358	1.98448e-54	1.84817e-52	0.0281337	0.503252	0.0837091	0.384905	UP_TGF
ELN	3	36072.1	2.98164	0.192251	15.5091	3.01238e-54	2.77377e-52	0.232327	0.438041	0.0122379	0.317394	UP_TGF
PRKG2	3	1260.21	-4.61341	0.297884	-15.4873	4.22866e-54	3.85021e-52	0.00117363	0.614673	0.332623	0.0515305	UP_BMP
SIX1	3	2065.17	2.07431	0.134627	15.4079	1.4492e-53	1.30492e-51	0.0630339	0.611724	0.303942	0.0213001	UP_TGF
ROR2	3	2615.5	-2.39396	0.156221	-15.3242	5.26787e-53	4.64085e-51	0.00804241	0.755571	0.173667	0.062719	UP_BMP
SCNN1A	3	2172.98	-2.67919	0.174987	-15.3108	6.4734e-53	5.62096e-51	0.259371	0.642195	0.0747657	0.0236693	UP_BMP
AMOTL1	3	11667.9	-1.73243	0.113364	-15.282	1.00769e-52	8.64385e-51	0.13098	0.641066	0.205397	0.022557	UP_BMP
GPSM1	3	11952.5	-3.10279	0.206037	-15.0593	2.99802e-51	2.44309e-49	0.172815	0.644127	0.106678	0.0763789	UP_BMP
MBP	3	541.532	3.42104	0.232432	14.7185	4.9061e-49	3.73643e-47	0.0289061	0.928198	0.0110064	0.031889	UP_TGF
AP1AR	3	904.758	-2.55944	0.174515	-14.666	1.06447e-48	7.99481e-47	0.0105835	0.552415	0.415187	0.0218145	UP_BMP
SLC15A2	3	317.959	-3.67019	0.253616	-14.4714	1.83613e-47	1.32413e-45	0.0031244	0.727623	0.206783	0.0624695	UP_BMP
PTGIS	3	1776	2.4543	0.17024	14.4167	4.06061e-47	2.90262e-45	0.196058	0.487901	0.284618	0.0314231	UP_TGF
HMCN1	3	3319.04	2.55682	0.177419	14.4112	4.40028e-47	3.13169e-45	0.103122	0.460306	0.381034	0.0555386	UP_TGF
BCR	3	2411.68	1.94449	0.135412	14.3598	9.25017e-47	6.49824e-45	0.00759314	0.677962	0.255024	0.0594215	UP_TGF
NUAK1	3	1939.6	2.8013	0.195869	14.3019	2.12772e-46	1.47564e-44	0.1544	0.554836	0.114493	0.176271	UP_TGF
CDH11	3	8394.11	2.16017	0.151894	14.2216	6.72659e-46	4.56792e-44	0.00220086	0.846136	0.0820548	0.0696082	UP_TGF
MFAP2	3	4160.19	3.45029	0.244043	14.1381	2.21323e-45	1.45449e-43	0.00614343	0.898044	0.0218984	0.073914	UP_TGF
PAPLN	3	1280.88	-3.06914	0.218446	-14.0499	7.71282e-45	4.92955e-43	0.0678288	0.884161	0.0249838	0.0230264	UP_BMP
PTP4A1	3	5176.04	-1.9777	0.141091	-14.0172	1.22274e-44	7.78444e-43	0.00479825	0.43265	0.431273	0.131278	UP_BMP
LRP5	3	2333.45	2.86788	0.204807	14.0028	1.49787e-44	9.49897e-43	0.250168	0.483223	0.0207542	0.245855	UP_TGF
CAMK2G	3	2592.68	-2.20878	0.161124	-13.7086	9.02429e-43	5.38747e-41	0.0659182	0.468758	0.455331	0.00999242	UP_BMP
MEF2C	3	6197.03	-3.40667	0.249724	-13.6417	2.26189e-42	1.34541e-40	0.0305396	0.521809	0.0593548	0.388297	UP_BMP
USH1C	3	1983.01	4.62806	0.341796	13.5404	9.02527e-42	5.31025e-40	0.0848691	0.535437	0.0133522	0.366341	UP_TGF
FLI1	3	891.444	2.55437	0.189354	13.4899	1.79248e-41	1.04709e-39	0.346179	0.513324	0.0185506	0.121947	UP_TGF
EZR	3	12253.5	-2.53722	0.189308	-13.4026	5.83923e-41	3.31595e-39	0.0951241	0.512656	0.126172	0.266047	UP_BMP
ZNF853	3	696.447	2.26384	0.172123	13.1524	1.64755e-39	8.86197e-38	0.224122	0.460748	0.0468489	0.268281	UP_TGF
CACNA1H	3	3272.54	-3.30899	0.253796	-13.038	7.44299e-39	3.87559e-37	0.0245378	0.652574	0.00740929	0.315479	UP_BMP
TGFBR2	3	8777.15	2.3507	0.18031	13.037	7.53828e-39	3.9127e-37	0.0373718	0.870515	0.00682834	0.0852852	UP_TGF
STRAP	3	5443.84	-1.69179	0.131118	-12.9029	4.33687e-38	2.18831e-36	0.245637	0.416878	0.0885846	0.2489	UP_BMP
SERPINF1	3	4575.03	3.02625	0.234946	12.8807	5.7846e-38	2.89194e-36	0.0121424	0.670828	0.153885	0.163145	UP_TGF
KCNQ5	3	1376.98	2.9609	0.229931	12.8774	6.03683e-38	3.00881e-36	0.0799027	0.820105	0.0426719	0.0573205	UP_TGF
RPS6KA5	3	600.728	-2.66647	0.209287	-12.7407	3.51066e-37	1.70796e-35	0.067166	0.482913	0.425172	0.0247499	UP_BMP
ITGA10	3	29914.3	2.10057	0.168397	12.4739	1.03603e-35	4.75639e-34	0.175152	0.288814	0.440523	0.0955107	UP_TGF
TRIM36	3	375.958	-4.8767	0.393333	-12.3984	2.66584e-35	1.20354e-33	0.188592	0.580403	0.105667	0.125338	UP_BMP
PITPNM3	3	915.487	1.89807	0.155735	12.1878	3.61021e-34	1.56072e-32	0.12022	0.535787	0.0553267	0.288666	UP_TGF
FZD2	3	1192.66	2.93572	0.24163	12.1497	5.75939e-34	2.47017e-32	0.141953	0.746857	0.0609209	0.0502689	UP_TGF
SPRY1	3	657.63	-2.3814	0.196808	-12.1001	1.05457e-33	4.49931e-32	0.235326	0.505707	0.127036	0.131931	UP_BMP
SCRG1	3	29017.2	-2.54233	0.2133	-11.919	9.42043e-33	3.84797e-31	0.145685	0.598731	0.200398	0.0551869	UP_BMP
ATP1A1	3	22276.5	-1.79745	0.152416	-11.793	4.24089e-32	1.67356e-30	0.0149398	0.640876	0.341453	0.00273114	UP_BMP
KIF26B	3	3061.09	-2.48453	0.211369	-11.7545	6.69778e-32	2.60526e-30	0.309988	0.43363	0.246895	0.00948723	UP_BMP
LINC00607	3	373.335	3.60076	0.306786	11.7371	8.23056e-32	3.19385e-30	0.136487	0.578239	0.0753101	0.209964	UP_TGF
CHRDL1	3	441.542	2.91363	0.248336	11.7326	8.67446e-32	3.35811e-30	0.00458585	0.727386	0.235515	0.0325135	UP_TGF
CHRDL2	3	189.497	-4.63767	0.396455	-11.6979	1.30721e-31	5.01292e-30	0.0851499	0.807133	0.0464968	0.0612201	UP_BMP
TPM1	3	9678.86	1.92743	0.16579	11.6257	3.05053e-31	1.15622e-29	0.153461	0.440956	0.324167	0.0814153	UP_TGF
RTKN	3	2868.74	1.62237	0.139928	11.5943	4.40454e-31	1.65404e-29	0.000974787	0.653911	0.0879175	0.257196	UP_TGF
MEOX2	3	305.491	2.47351	0.216077	11.4474	2.42426e-30	8.8824e-29	0.0238717	0.751498	0.0137574	0.210873	UP_TGF
SNAI1	3	1270.82	-2.88493	0.252018	-11.4473	2.42525e-30	8.8824e-29	0.347912	0.406041	0.195306	0.0507407	UP_BMP
ARHGEF9	3	2402.52	-1.70949	0.151141	-11.3105	1.16412e-29	4.16984e-28	0.0700555	0.712513	0.0528649	0.164566	UP_BMP
CMTM3	3	964.561	1.65882	0.148688	11.1564	6.66477e-29	2.30132e-27	0.0405823	0.560217	0.340256	0.0589451	UP_TGF
BAALC	3	354.605	4.08414	0.368489	11.0835	1.50862e-28	5.11175e-27	0.0443674	0.859993	0.0449117	0.0507276	UP_TGF
BMP1	3	3142.13	1.75578	0.159324	11.0202	3.05301e-28	1.02594e-26	0.269265	0.719416	0.00595959	0.00535876	UP_TGF
EPHB4	3	1934.82	1.76722	0.160377	11.0192	3.08876e-28	1.03582e-26	0.0782315	0.864884	0.0201773	0.036707	UP_TGF
FSTL1	3	39315.5	1.81586	0.165076	11.0001	3.81564e-28	1.27172e-26	0.155251	0.795143	0.0241916	0.0254145	UP_TGF
SLC4A4	3	691.318	-2.0411	0.18644	-10.9477	6.81247e-28	2.24302e-26	0.109089	0.474486	0.252912	0.163512	UP_BMP
FST	3	8536.84	-6.80288	0.629383	-10.8088	3.12739e-27	1.00732e-25	0.115793	0.595032	0.00289436	0.286281	UP_BMP
S100A1	3	9024.72	-1.83149	0.169538	-10.8028	3.33943e-27	1.07349e-25	0.270646	0.469312	0.0496593	0.210383	UP_BMP
SMAD6	3	1687.5	-1.82395	0.169355	-10.77	4.7717e-27	1.5219e-25	0.247723	0.427297	0.041321	0.283659	UP_BMP
MAFK	3	1103.16	2.01196	0.187644	10.7222	8.00579e-27	2.53356e-25	0.0080325	0.56075	0.403963	0.0272545	UP_TGF
NINJ1	3	1434.14	1.69617	0.158546	10.6983	1.03668e-26	3.25545e-25	0.0997535	0.771687	0.0872218	0.0413373	UP_TGF
SERPINA3	3	5197.73	2.8412	0.266021	10.6803	1.25805e-26	3.92792e-25	0.00929183	0.916807	0.0638226	0.0100788	UP_TGF
MYC	3	1517.08	-1.84099	0.172631	-10.6643	1.4954e-26	4.66005e-25	0.212295	0.479091	0.289176	0.0194373	UP_BMP
PSTPIP2	3	515.193	-2.45498	0.230271	-10.6613	1.54481e-26	4.80483e-25	0.00474368	0.70418	0.00193176	0.289145	UP_BMP
LGMN	3	3310.78	-1.33249	0.125672	-10.603	2.88694e-26	8.8944e-25	0.394929	0.404221	0.0331894	0.167661	UP_BMP
HHIP	3	1794.54	-3.06868	0.292132	-10.5044	8.24149e-26	2.49202e-24	0.0303912	0.797243	0.155125	0.0172402	UP_BMP
RASAL2	3	1411.8	-2.04445	0.194775	-10.4965	8.96667e-26	2.70127e-24	0.00270529	0.567255	0.3239	0.106139	UP_BMP
CACNB1	3	1119.12	2.55004	0.248266	10.2714	9.47977e-25	2.67303e-23	0.0580071	0.590576	0.265232	0.0861856	UP_TGF
TMEM158	3	228.843	-2.88944	0.281918	-10.2492	1.19335e-24	3.32466e-23	0.057303	0.475095	0.315278	0.152324	UP_BMP
DOCK9	3	717.717	2.02761	0.200316	10.1221	4.40967e-24	1.20383e-22	0.0418518	0.90218	0.0550493	0.000918998	UP_TGF
STMN3	3	252.858	2.94395	0.2911	10.1132	4.82761e-24	1.31134e-22	0.0662356	0.355271	0.457657	0.120836	UP_TGF
BCKDHB	3	1968.06	-2.10663	0.209509	-10.0551	8.72219e-24	2.32658e-22	0.310982	0.471104	0.177721	0.0401929	UP_BMP
CROT	3	976.925	-2.62149	0.261102	-10.0401	1.01564e-23	2.6959e-22	0.0735511	0.787595	0.0525875	0.0862667	UP_BMP
CRYBG1	3	3187.52	-2.78439	0.278042	-10.0143	1.31921e-23	3.48468e-22	0.00524431	0.879253	0.10551	0.00999288	UP_BMP
CACNA1G	3	606.423	3.34558	0.334342	10.0065	1.42763e-23	3.75282e-22	0.0350167	0.67098	0.266238	0.027765	UP_TGF
MAPK10	3	483.72	-2.68582	0.269442	-9.96808	2.10254e-23	5.46526e-22	0.0708309	0.729265	0.197001	0.00290235	UP_BMP
JCAD	3	1384.16	2.07989	0.209164	9.94379	2.68416e-23	6.93288e-22	0.264401	0.403441	0.022647	0.309511	UP_TGF
NEDD4L	3	1435.15	-2.69794	0.27253	-9.89961	4.17883e-23	1.06583e-21	0.00236651	0.688101	0.0750082	0.234524	UP_BMP
TACC1	3	3276.93	1.56978	0.158754	9.88818	4.68484e-23	1.18561e-21	0.244535	0.688093	0.0111446	0.0562269	UP_TGF
SATB1	3	2549.05	-1.90418	0.192777	-9.87766	5.20357e-23	1.31079e-21	0.0975885	0.587619	0.252175	0.0626178	UP_BMP
MAN1C1	3	351.074	1.72741	0.176362	9.79472	1.18623e-22	2.93817e-21	0.105369	0.736777	0.0824055	0.0754482	UP_TGF
CA11	3	178.766	3.18189	0.325274	9.78218	1.34289e-22	3.31803e-21	0.0151737	0.6431	0.0366145	0.305112	UP_TGF
TMSB4X	3	5410.87	1.80481	0.18451	9.78166	1.34982e-22	3.32818e-21	0.135927	0.531356	0.176855	0.155861	UP_TGF
RIPOR3	3	218.17	-3.85437	0.395346	-9.74934	1.85666e-22	4.55035e-21	0.390117	0.495879	0.0944645	0.0195394	UP_BMP
C1orf198	3	8563.78	-1.68273	0.173014	-9.72595	2.33716e-22	5.67676e-21	0.000132111	0.578825	0.166521	0.254522	UP_BMP
FIBIN	3	5235.37	2.79965	0.290471	9.63831	5.50882e-22	1.3184e-20	0.107026	0.60489	0.0225724	0.265511	UP_TGF
CELSR1	3	433.652	2.73029	0.285428	9.56559	1.11567e-21	2.63143e-20	0.0668606	0.561992	0.209904	0.161243	UP_TGF
FKBP5	3	35798.1	-1.29009	0.13504	-9.55342	1.25484e-21	2.94689e-20	0.00478434	0.556244	0.19207	0.246902	UP_BMP
STON2	3	135.834	-2.83872	0.299534	-9.47712	2.61387e-21	6.03411e-20	0.0800777	0.605727	0.0324531	0.281742	UP_BMP
DCN	3	129447	-1.85365	0.196087	-9.45316	3.28738e-21	7.53554e-20	0.342542	0.559097	0.0576847	0.0406767	UP_BMP
EBF2	3	984.225	3.34873	0.354913	9.43536	3.89653e-21	8.88192e-20	0.124085	0.59711	0.0534955	0.225309	UP_TGF
GLIPR2	3	256.181	2.32391	0.246345	9.43353	3.96518e-21	9.02577e-20	0.128997	0.496754	0.0186201	0.355629	UP_TGF
CRABP2	3	567.696	2.34611	0.25151	9.3281	1.07784e-20	2.38031e-19	0.163464	0.667526	0.0734565	0.0955529	UP_TGF
IGSF3	3	2673.58	2.32596	0.249426	9.32526	1.10716e-20	2.44175e-19	0.0851867	0.658596	0.109841	0.146376	UP_TGF
FBLIM1	3	1298.52	1.42123	0.153813	9.24002	2.46463e-20	5.3558e-19	0.194893	0.477806	0.134747	0.192554	UP_TGF
HAUS7	3	419.26	1.87946	0.203832	9.22063	2.95367e-20	6.36758e-19	0.0105122	0.507117	0.101701	0.38067	UP_TGF
CEP350	3	2241.3	-1.34286	0.145904	-9.20375	3.45665e-20	7.43226e-19	0.218201	0.558853	0.119325	0.103621	UP_BMP
PRCD	3	75.3729	3.69877	0.402825	9.18209	4.22811e-20	9.07902e-19	0.00902924	0.464133	0.40254	0.124298	UP_TGF
FAM180A	3	1822.19	2.24169	0.246227	9.10418	8.69211e-20	1.83265e-18	0.0633555	0.700347	0.127235	0.109062	UP_TGF
SLC43A2	3	191.613	-2.39241	0.262892	-9.10033	9.00614e-20	1.89396e-18	0.029276	0.727539	0.00752459	0.235661	UP_BMP
BCL9L	3	3146.89	1.32617	0.146253	9.06766	1.21601e-19	2.54409e-18	0.0675144	0.520513	0.214939	0.197034	UP_TGF
SLC7A5	3	14129.3	-2.21813	0.244663	-9.06607	1.23386e-19	2.57813e-18	0.0421118	0.584741	0.0142708	0.358877	UP_BMP
STK26	3	15916.6	-1.64142	0.182801	-8.9793	2.7249e-19	5.57711e-18	0.0808295	0.602898	0.28696	0.0293121	UP_BMP
KCNMB2	3	125.408	2.86481	0.321164	8.92008	4.65967e-19	9.42224e-18	0.116041	0.647957	0.102822	0.13318	UP_TGF
AGAP3	3	1300.95	1.54225	0.173217	8.90353	5.40981e-19	1.08985e-17	0.0633422	0.584149	0.226501	0.126008	UP_TGF
MED12L	3	277.156	-2.9555	0.333674	-8.85744	8.18758e-19	1.63131e-17	0.0919292	0.663973	0.172287	0.0718103	UP_BMP
FAM241A	3	245.795	-3.99747	0.451676	-8.85031	8.72728e-19	1.7346e-17	0.03263	0.655783	0.21266	0.0989267	UP_BMP
ITM2C	3	8075.46	1.61338	0.182341	8.84812	8.9003e-19	1.76683e-17	0.0158686	0.510073	0.274282	0.199776	UP_TGF
VAMP8	3	183.249	-2.95423	0.336354	-8.78309	1.59039e-18	3.1005e-17	0.0392687	0.591634	0.0282682	0.340829	UP_BMP
LIMS2	3	641.651	1.39197	0.159399	8.73262	2.48829e-18	4.81642e-17	0.0237735	0.840945	0.037266	0.0980151	UP_TGF
OSMR	3	1624.68	2.50731	0.288568	8.68881	3.66252e-18	7.03082e-17	0.270767	0.476396	0.0021119	0.250725	UP_TGF
VSTM4	3	516.701	1.63719	0.188563	8.68245	3.87329e-18	7.42305e-17	0.231338	0.525627	0.102742	0.140293	UP_TGF
TTYH3	3	4006.89	2.15523	0.248489	8.67332	4.19705e-18	8.00978e-17	0.0936691	0.574128	0.032932	0.29927	UP_TGF
GPR153	3	7126.39	-2.47783	0.286897	-8.63663	5.78931e-18	1.09842e-16	0.0110853	0.649696	0.059079	0.28014	UP_BMP
ZFYVE28	3	100.831	4.38755	0.508528	8.62795	6.24599e-18	1.18231e-16	0.247597	0.40551	0.203921	0.142972	UP_TGF
JMJD1C	3	2451.12	1.20005	0.139455	8.60534	7.60896e-18	1.4287e-16	0.00537444	0.777057	0.142527	0.0750422	UP_TGF
LYPD1	3	504.165	7.4186	0.862348	8.60278	7.78073e-18	1.45927e-16	0.119511	0.400776	0.350341	0.129373	UP_TGF
DAB2IP	3	924.35	1.964	0.229108	8.57238	1.01369e-17	1.87741e-16	0.0173829	0.775571	0.047503	0.159543	UP_TGF
OAT	3	2888.35	1.01455	0.11839	8.56952	1.03916e-17	1.92021e-16	0.00219633	0.760199	0.0457046	0.1919	UP_TGF
MLPH	3	495.314	-2.92913	0.341992	-8.56492	1.08154e-17	1.99626e-16	0.0364286	0.748908	0.0940111	0.120653	UP_BMP
HES6	3	177.685	2.64635	0.311048	8.50783	1.77218e-17	3.23076e-16	0.00531459	0.735846	0.244011	0.0148282	UP_TGF
INTU	3	872.32	-2.3429	0.27646	-8.47463	2.3582e-17	4.25155e-16	0.00385995	0.752305	0.242907	0.000928666	UP_BMP
ARHGEF40	3	5589.97	1.77259	0.209337	8.46763	2.50427e-17	4.49995e-16	0.0680629	0.584662	0.0598985	0.287376	UP_TGF
HADH	3	2924.02	-1.28645	0.152276	-8.44815	2.95965e-17	5.28908e-16	0.000594185	0.577522	0.164571	0.257313	UP_BMP
TCF4	3	1975.54	1.84916	0.218994	8.44388	3.06971e-17	5.4618e-16	0.0598817	0.684553	0.209802	0.0457637	UP_TGF
ECM2	3	1362.16	1.61446	0.192259	8.39733	4.56738e-17	8.00422e-16	0.26251	0.466526	0.0790654	0.191898	UP_TGF
GRIN2D	3	1154.76	2.30115	0.275074	8.36556	5.98286e-17	1.03954e-15	0.2569	0.543587	0.00465591	0.194857	UP_TGF
FBXL22	3	135.732	-3.88849	0.467358	-8.32014	8.78611e-17	1.50733e-15	0.307644	0.412128	0.12535	0.154878	UP_BMP
NPDC1	3	1023.66	2.18881	0.263401	8.30978	9.58763e-17	1.63966e-15	0.0333233	0.362154	0.506695	0.0978277	UP_TGF
F11R	3	414.611	-2.47868	0.300022	-8.26165	1.43674e-16	2.42652e-15	0.00583163	0.786884	0.197313	0.00997134	UP_BMP
GDPD5	3	322.806	2.03046	0.246885	8.22429	1.96346e-16	3.28307e-15	0.134519	0.678922	0.168053	0.0185055	UP_TGF
PCSK9	3	658.679	-2.8825	0.351112	-8.20963	2.21878e-16	3.67497e-15	0.122356	0.77168	0.0298718	0.0760916	UP_BMP
AVPI1	3	573.669	-1.62495	0.1985	-8.18616	2.69684e-16	4.43522e-15	0.132138	0.375793	0.46731	0.0247589	UP_BMP
FMNL2	3	1579.68	1.99262	0.244721	8.1424	3.87517e-16	6.31575e-15	0.0695052	0.667839	0.144254	0.118402	UP_TGF
PDE11A	3	243.768	2.23031	0.275631	8.09164	5.88656e-16	9.48015e-15	0.0119539	0.78764	0.0818297	0.118576	UP_TGF
CROCC	3	1548.54	1.18916	0.14739	8.06815	7.13735e-16	1.14268e-14	0.127277	0.570486	0.0917791	0.210458	UP_TGF
MGST2	3	223.136	-2.00929	0.249645	-8.04858	8.3762e-16	1.33316e-14	0.0504028	0.910743	0.0125488	0.0263057	UP_BMP
RIN1	3	234.49	2.3831	0.296223	8.04496	8.62746e-16	1.36914e-14	0.0664743	0.702404	0.0333174	0.197804	UP_TGF
CARD10	3	59.8365	3.17889	0.396343	8.02057	1.05259e-15	1.66071e-14	0.044495	0.4875	0.445575	0.0224298	UP_TGF
FHOD3	3	376.582	1.97586	0.248413	7.95395	1.80662e-15	2.79093e-14	0.253932	0.654626	0.0826965	0.00874538	UP_TGF
FJX1	3	110.605	2.89716	0.364882	7.93998	2.02216e-15	3.11799e-14	0.0454506	0.491242	0.189731	0.273577	UP_TGF
COL8A1	3	26427.5	1.51861	0.191943	7.91177	2.53746e-15	3.90146e-14	0.0829201	0.468929	0.228535	0.219617	UP_TGF
FBXO27	3	614.454	-1.38323	0.174939	-7.90694	2.63798e-15	4.04839e-14	0.0135863	0.811555	0.000563635	0.174295	UP_BMP
PAK3	3	275.155	2.97685	0.376699	7.90246	2.73463e-15	4.19275e-14	0.0337824	0.811331	0.137891	0.0169951	UP_TGF
SOX6	3	4041.96	-1.65094	0.209024	-7.89833	2.82654e-15	4.32554e-14	0.00890036	0.438873	0.112985	0.439241	UP_BMP
PLEKHF1	3	89.5307	2.93037	0.372002	7.8773	3.34526e-15	5.07645e-14	0.0706953	0.410064	0.153185	0.366056	UP_TGF
SOX18	3	328.782	-2.63151	0.334244	-7.87301	3.46205e-15	5.24879e-14	0.101775	0.660332	0.192571	0.0453218	UP_BMP
KCNB1	3	60.8904	-3.51578	0.447378	-7.85863	3.88353e-15	5.86596e-14	0.0249598	0.770251	0.104986	0.0998029	UP_BMP
KBTBD8	3	168.25	1.94096	0.24784	7.83147	4.82189e-15	7.20984e-14	0.0282085	0.612862	0.307776	0.0511534	UP_TGF
PRMT9	3	603.659	-1.5791	0.202215	-7.80903	5.7632e-15	8.5858e-14	0.0437715	0.668049	0.0533372	0.234842	UP_BMP
LAMA3	3	340.394	2.05303	0.26314	7.80204	6.09138e-15	9.04989e-14	0.102676	0.400904	0.337691	0.15873	UP_TGF
ATP8B2	3	10769.5	1.17488	0.150739	7.79409	6.48734e-15	9.62062e-14	0.00360073	0.365143	0.507028	0.124229	UP_TGF
LAMA4	3	2700.55	-1.53127	0.196972	-7.77404	7.60214e-15	1.1233e-13	0.000231478	0.774987	0.170922	0.0538595	UP_BMP
PDZD2	3	2258.64	-1.45392	0.187464	-7.75575	8.78246e-15	1.29301e-13	0.0248769	0.907035	0.0590728	0.009015	UP_BMP
CSGALNACT2	3	1011.04	1.3893	0.179164	7.75432	8.88207e-15	1.30414e-13	0.0153433	0.551211	0.167251	0.266195	UP_TGF
DTX4	3	171.982	-1.78397	0.230094	-7.75323	8.95862e-15	1.3142e-13	0.0265097	0.496964	0.474129	0.00239719	UP_BMP
PKD1	3	17107.5	1.54281	0.199498	7.73344	1.04682e-14	1.52739e-13	0.00220217	0.705982	0.0459908	0.245825	UP_TGF
SENCR	3	75.649	3.70381	0.479317	7.72726	1.09883e-14	1.59614e-13	0.187261	0.50936	0.207844	0.0955353	UP_TGF
SNAPC3	3	1713.57	-1.37523	0.178177	-7.71834	1.17857e-14	1.70741e-13	0.27133	0.424227	0.0485287	0.255914	UP_BMP
SVEP1	3	1779.16	1.92164	0.249073	7.71518	1.20808e-14	1.74395e-13	0.445614	0.441947	0.0283391	0.0841	UP_TGF
KIAA1614	3	649.789	1.42084	0.184633	7.69548	1.40959e-14	2.02767e-13	0.189664	0.515821	0.124073	0.170442	UP_TGF
FLOT2	3	462.497	1.43436	0.186588	7.6873	1.50274e-14	2.15638e-13	0.00319264	0.613683	0.378367	0.00475731	UP_TGF
MYO1B	3	2062.19	-1.79981	0.234128	-7.68727	1.50304e-14	2.15638e-13	1.74613e-08	0.809885	0.163665	0.0264499	UP_BMP
JAK2	3	1284	-1.48174	0.192918	-7.68068	1.58248e-14	2.26636e-13	0.130532	0.404331	0.401462	0.0636744	UP_BMP
RBP4	3	648.974	-2.75053	0.358558	-7.67108	1.70552e-14	2.44043e-13	0.00948875	0.413251	0.124636	0.452624	UP_BMP
ATG16L2	3	579.04	1.61843	0.211123	7.6658	1.77713e-14	2.53622e-13	0.0799187	0.70796	0.00499972	0.207121	UP_TGF
LAMA1	3	266.692	2.77024	0.361545	7.66223	1.82727e-14	2.60322e-13	0.00810932	0.623965	0.287333	0.0805934	UP_TGF
DYNC1H1	3	15242.1	1.04373	0.136972	7.62004	2.53595e-14	3.56931e-13	0.0140761	0.726012	0.167268	0.0926437	UP_TGF
RBMS1	3	3224.5	0.997469	0.13152	7.58419	3.3457e-14	4.65257e-13	0.0374756	0.902398	0.0339735	0.0261527	UP_TGF
TBCEL	3	1029.59	-1.20403	0.158813	-7.58146	3.41675e-14	4.73522e-13	0.00907805	0.657465	0.311286	0.0221716	UP_BMP
PDE4D	3	1158.91	-1.31167	0.173928	-7.54149	4.64639e-14	6.35293e-13	0.0421018	0.546095	0.00385562	0.407948	UP_BMP
GPC1	3	11585	-1.18508	0.157291	-7.53427	4.91061e-14	6.69733e-13	0.00983467	0.782499	0.189985	0.017681	UP_BMP
SKI	3	6483.27	1.17176	0.155601	7.53053	5.05331e-14	6.88043e-13	0.165351	0.797818	0.0213972	0.0154329	UP_TGF
MAGEL2	3	125.446	2.16517	0.289404	7.48148	7.34896e-14	9.89044e-13	0.0376565	0.472306	0.199453	0.290584	UP_TGF
ARL10	3	2528.25	1.53501	0.205608	7.46569	8.28665e-14	1.11157e-12	0.148763	0.587327	0.21917	0.0447401	UP_TGF
NR3C1	3	2819.45	-0.909357	0.122217	-7.4405	1.00305e-13	1.33997e-12	0.00115954	0.921283	0.0662501	0.0113076	UP_BMP
CPQ	3	1093.38	1.26234	0.170529	7.4025	1.33641e-13	1.76935e-12	0.0179581	0.798813	0.00210679	0.181123	UP_TGF
CA12	3	8881.47	-5.12298	0.692152	-7.40152	1.34637e-13	1.77965e-12	0.0126235	0.627268	0.269708	0.0904003	UP_BMP
NT5E	3	1593.72	2.25033	0.307054	7.32879	2.32233e-13	3.02069e-12	0.102983	0.800934	0.00522692	0.090856	UP_TGF
FGF9	3	149.39	4.18263	0.571941	7.31305	2.61148e-13	3.38061e-12	0.141044	0.525072	0.0893848	0.2445	UP_TGF
DEK	3	1649.91	1.15893	0.158879	7.2944	2.99982e-13	3.86186e-12	0.145364	0.681885	0.0720501	0.100701	UP_TGF
GRIK5	3	225.985	2.25815	0.310991	7.26113	3.83869e-13	4.89538e-12	0.318068	0.441784	0.00573003	0.234418	UP_TGF
FIBCD1	3	202.131	2.94701	0.406142	7.2561	3.98403e-13	5.07278e-12	0.0316073	0.410485	0.490168	0.0677395	UP_TGF
USP3-AS1	3	72.8385	-2.675	0.368971	-7.24989	4.17108e-13	5.29854e-12	0.104879	0.583037	0.0232797	0.288804	UP_BMP
KLHL5	3	1591.43	-1.13811	0.157012	-7.24854	4.21276e-13	5.34316e-12	0.0480047	0.480124	0.421285	0.0505865	UP_BMP
PSME4	3	2763.28	-1.18671	0.163889	-7.24094	4.45571e-13	5.63376e-12	0.00937922	0.750676	0.04631	0.193635	UP_BMP
EGF	3	96.8367	-2.26833	0.315908	-7.18034	6.95396e-13	8.66481e-12	0.014304	0.805272	0.110941	0.0694837	UP_BMP
FGD5	3	286.225	1.47167	0.206809	7.1161	1.11021e-12	1.36663e-11	0.000570536	0.53334	0.369098	0.0969915	UP_TGF
NAT14	3	178.468	1.72818	0.243779	7.08912	1.34972e-12	1.64776e-11	0.0168947	0.559709	0.37926	0.0441363	UP_TGF
MPP6	3	1656.24	-1.11656	0.15827	-7.05478	1.72877e-12	2.09327e-11	0.00588875	0.530094	0.131426	0.332591	UP_BMP
TESC	3	93.3	3.20668	0.455863	7.03431	2.00256e-12	2.41404e-11	0.00356826	0.639366	0.220525	0.136541	UP_TGF
GLUL	3	5223.44	1.74412	0.248185	7.02749	2.10282e-12	2.52369e-11	0.00641178	0.791645	0.1671	0.0348438	UP_TGF
OLFML2B	3	1573.1	2.05113	0.292636	7.00913	2.39798e-12	2.86737e-11	0.057584	0.593409	0.263176	0.0858312	UP_TGF
RAI1	3	3053.29	1.19057	0.169954	7.00527	2.46507e-12	2.93897e-11	0.0296901	0.700399	0.103765	0.166145	UP_TGF
SRPK2	3	1642.35	-0.944209	0.135108	-6.98853	2.7778e-12	3.29016e-11	0.0749509	0.362588	0.501064	0.0613963	UP_BMP
EMP3	3	2659.06	1.07799	0.154789	6.96424	3.30192e-12	3.87714e-11	0.0245246	0.49055	0.0900683	0.394857	UP_TGF
DAB2	3	1193.44	1.26584	0.18211	6.95099	3.62725e-12	4.24082e-11	0.00205859	0.690783	0.236127	0.0710307	UP_TGF
MCAM	3	2557.11	-1.16759	0.1684	-6.93343	4.10751e-12	4.7715e-11	0.0228485	0.728319	0.146401	0.102431	UP_BMP
RPL10	3	26913.3	0.767279	0.110916	6.91767	4.59116e-12	5.30686e-11	0.00220684	0.559669	0.229652	0.208472	UP_TGF
RERG	3	137.923	1.78457	0.258502	6.90349	5.07405e-12	5.82373e-11	0.142434	0.678461	0.164664	0.0144412	UP_TGF
INSR	3	3937.12	-0.910458	0.132032	-6.89575	5.35806e-12	6.14537e-11	0.111686	0.409541	0.164832	0.313942	UP_BMP
ANXA5	3	16928.1	-1.05338	0.152837	-6.89217	5.49477e-12	6.28448e-11	0.314748	0.653176	0.0310664	0.00100986	UP_BMP
TMED8	3	1488.69	-0.958387	0.139687	-6.86093	6.84122e-12	7.75909e-11	0.0942386	0.676887	0.029202	0.199673	UP_BMP
NCOA2	3	1463.95	-1.0461	0.152547	-6.85756	7.00482e-12	7.9281e-11	0.0001598	0.784286	0.0601731	0.155381	UP_BMP
PRPS1	3	2044.69	-1.08063	0.1577	-6.85243	7.26038e-12	8.18891e-11	0.102999	0.518308	0.286288	0.0924053	UP_BMP
S100Z	3	72.3437	-2.6537	0.388735	-6.8265	8.70137e-12	9.72001e-11	0.147023	0.836905	0.00461982	0.0114521	UP_BMP
TBX2	3	150.629	-2.69535	0.398219	-6.7685	1.30127e-11	1.43008e-10	0.279676	0.66621	0.036569	0.0175449	UP_BMP
APH1B	3	770.425	-1.15554	0.171029	-6.75638	1.41482e-11	1.54549e-10	0.0845473	0.79454	0.00277533	0.118138	UP_BMP
ANKEF1	3	112.656	-1.86201	0.275657	-6.75483	1.43e-11	1.56103e-10	0.0562648	0.580562	0.242531	0.120642	UP_BMP
EFR3A	3	2218.04	-0.898818	0.13332	-6.7418	1.5644e-11	1.70091e-10	0.0287232	0.483591	0.0541632	0.433522	UP_BMP
FAM166B	3	60.0907	-4.42514	0.663683	-6.66756	2.60097e-11	2.77063e-10	0.0250625	0.871844	0.0880451	0.0150483	UP_BMP
SLC38A5	3	455.558	2.75673	0.414454	6.65146	2.90191e-11	3.06714e-10	0.00178433	0.569948	0.235347	0.192921	UP_TGF
ARSJ	3	1463.59	-1.33454	0.201639	-6.61846	3.62952e-11	3.80166e-10	0.0312743	0.823161	0.103161	0.042403	UP_BMP
EGFR	3	1786.4	1.65661	0.250932	6.60182	4.06139e-11	4.23768e-10	0.00228952	0.456023	0.373133	0.168554	UP_TGF
PIAS3	3	2028.84	0.928805	0.140851	6.59425	4.27408e-11	4.4539e-10	0.0120147	0.60461	0.369722	0.0136538	UP_TGF
HAND2-AS1	3	327.431	-2.49552	0.37903	-6.58397	4.58064e-11	4.75511e-10	0.0250404	0.909842	0.0247276	0.0403899	UP_BMP
ARHGEF10	3	2839.37	1.2664	0.192558	6.57672	4.80929e-11	4.98612e-10	0.219791	0.416015	0.300991	0.0632036	UP_TGF
EVA1B	3	932.883	1.50179	0.229471	6.5446	5.96544e-11	6.15346e-10	0.346808	0.529993	0.0206567	0.102543	UP_TGF
RIPK4	3	82.6788	2.31762	0.354137	6.54441	5.973e-11	6.15736e-10	0.0193608	0.792638	0.152025	0.0359759	UP_TGF
RTN2	3	176.247	-1.99181	0.304744	-6.53599	6.31885e-11	6.50156e-10	0.370716	0.458909	0.125362	0.0450126	UP_BMP
ARPIN	3	533.307	1.1046	0.169153	6.5302	6.56835e-11	6.74528e-10	0.15685	0.361261	0.438946	0.0429425	UP_TGF
RNF19A	3	1587.22	-1.06452	0.163086	-6.52735	6.69453e-11	6.86642e-10	0.0479027	0.773239	0.120545	0.0583133	UP_BMP
ANKRD35	3	192.786	2.36182	0.362465	6.51601	7.22017e-11	7.37308e-10	0.123475	0.543545	0.194623	0.138357	UP_TGF
FAM168A	3	3759.01	0.857085	0.131944	6.4958	8.25926e-11	8.38688e-10	0.0548866	0.64214	0.176098	0.126876	UP_TGF
WLS	3	2211.01	1.0714	0.166788	6.4237	1.33001e-10	1.3323e-09	0.346794	0.481037	0.116599	0.0555697	UP_TGF
TLE2	3	272.329	1.59526	0.248566	6.41786	1.38207e-10	1.3819e-09	0.0868206	0.633879	0.235937	0.0433634	UP_TGF
HSPA6	3	52.0583	-3.01367	0.472656	-6.37602	1.81751e-10	1.78659e-09	0.353617	0.538414	0.063299	0.0446703	UP_BMP
ADCY9	3	1490.52	1.09702	0.172334	6.36566	1.94449e-10	1.90682e-09	0.161579	0.654154	0.0411453	0.143121	UP_TGF
CLCN3	3	2419.8	-1.02165	0.161053	-6.34355	2.24533e-10	2.18997e-09	0.287561	0.378525	0.144862	0.189052	UP_BMP
ECHDC3	3	155.85	-2.06579	0.32643	-6.32843	2.47667e-10	2.40123e-09	0.0314168	0.861849	0.0544314	0.0523027	UP_BMP
STX1B	3	216.651	2.85458	0.451416	6.32362	2.55507e-10	2.47284e-09	0.118959	0.726378	0.0403701	0.114292	UP_TGF
CAMK2A	3	185.018	-2.2055	0.348887	-6.32152	2.59007e-10	2.50373e-09	0.193475	0.527811	0.0120903	0.266624	UP_BMP
SLC22A23	3	317.864	-1.98857	0.314777	-6.31741	2.65984e-10	2.56813e-09	0.0516936	0.704338	0.0484553	0.195514	UP_BMP
ABI3	3	40.019	3.81621	0.60414	6.31677	2.67094e-10	2.57733e-09	0.0227235	0.640877	0.0663293	0.27007	UP_TGF
AGPAT3	3	1021.39	1.30841	0.207345	6.31029	2.7851e-10	2.68431e-09	0.233928	0.546155	0.145466	0.0744506	UP_TGF
OAF	3	4282.14	1.43685	0.228085	6.29963	2.98357e-10	2.857e-09	0.00436524	0.602272	0.318054	0.0753086	UP_TGF
PDK3	3	1158.65	-1.37445	0.219846	-6.25187	4.05558e-10	3.82732e-09	0.0179328	0.716586	0.253106	0.0123746	UP_BMP
FZD10	3	42.2959	2.88734	0.462897	6.23754	4.44505e-10	4.17794e-09	0.0513174	0.561098	0.0343093	0.353276	UP_TGF
CDKN3	3	152.458	1.71127	0.274893	6.22522	4.80888e-10	4.5095e-09	0.0945412	0.740204	0.0548654	0.11039	UP_TGF
ST8SIA4	3	400.444	-1.76732	0.28606	-6.17815	6.48564e-10	6.01268e-09	0.179875	0.677744	0.0835115	0.0588697	UP_BMP
AMACR	3	706.364	1.19999	0.194306	6.17576	6.58458e-10	6.10094e-09	0.142994	0.369072	0.414408	0.0735266	UP_TGF
PDE8B	3	341.112	-2.21779	0.359327	-6.17207	6.74023e-10	6.23555e-09	0.11882	0.816609	0.0271889	0.037383	UP_BMP
SEC31B	3	458.865	1.23868	0.200692	6.17204	6.74134e-10	6.23555e-09	0.157872	0.592839	0.23133	0.0179596	UP_TGF
RILPL1	3	775.625	0.928439	0.150735	6.15942	7.30109e-10	6.71519e-09	0.00431269	0.528943	0.225654	0.24109	UP_TGF
SLC25A23	3	1077.73	1.07106	0.174419	6.14075	8.21321e-10	7.50751e-09	0.365613	0.513476	0.111038	0.00987287	UP_TGF
KLHL2	3	538.262	-1.2586	0.206166	-6.1048	1.0293e-09	9.3301e-09	0.0170565	0.470286	0.0541872	0.458471	UP_BMP
TNC	3	14655.4	-1.68343	0.27598	-6.09981	1.06197e-09	9.59968e-09	0.388579	0.407713	0.0809013	0.122807	UP_BMP
CD300A	3	77.8157	3.39679	0.55759	6.09192	1.11564e-09	1.00568e-08	0.20514	0.696035	0.0975772	0.00124824	UP_TGF
ALDH1L1	3	648.443	1.83574	0.301485	6.08897	1.13639e-09	1.02212e-08	0.334089	0.54366	0.0504681	0.0717828	UP_TGF
GLRX2	3	253.67	-1.16225	0.190908	-6.08801	1.14321e-09	1.02769e-08	0.0548369	0.56201	0.220321	0.162833	UP_BMP
C19orf71	3	75.2881	-2.19023	0.359927	-6.0852	1.16349e-09	1.04477e-08	0.0709881	0.76273	0.156394	0.00988876	UP_BMP
TRAF1	3	1252.87	1.43323	0.236782	6.05293	1.42233e-09	1.26604e-08	0.0690709	0.428123	0.146292	0.356514	UP_TGF
TNRC18	3	5119.55	0.7632	0.126246	6.04532	1.49109e-09	1.3258e-08	0.0190188	0.668702	0.232961	0.079318	UP_TGF
SH3D21	3	700.447	2.09558	0.347556	6.02948	1.64487e-09	1.45538e-08	0.331046	0.59272	0.0184866	0.057748	UP_TGF
MYOM1	3	163.542	-1.4491	0.240758	-6.01893	1.75573e-09	1.54759e-08	0.0134738	0.771542	0.0787104	0.136274	UP_BMP
RIMKLB	3	1142.79	1.03608	0.17219	6.01707	1.77597e-09	1.56374e-08	0.164806	0.551315	0.0487914	0.235087	UP_TGF
TLR5	3	235.091	2.08416	0.348582	5.97896	2.24562e-09	1.95822e-08	0.0796282	0.750382	0.0450291	0.124961	UP_TGF
LRCH1	3	483.762	0.98842	0.165424	5.97508	2.29978e-09	1.99797e-08	0.0379875	0.50415	0.0693796	0.388482	UP_TGF
ZNF358	3	1386.16	1.04281	0.174585	5.97309	2.32806e-09	2.02038e-08	0.161065	0.65563	0.10908	0.0742245	UP_TGF
PRMT2	3	2916.13	0.720438	0.120634	5.9721	2.34222e-09	2.03159e-08	0.0479736	0.830912	0.0873771	0.0337374	UP_TGF
HEG1	3	681.173	1.5818	0.265442	5.95911	2.5362e-09	2.19051e-08	0.188447	0.512147	0.0542291	0.245177	UP_TGF
PROCA1	3	73.399	2.02555	0.339915	5.959	2.53789e-09	2.19081e-08	0.31165	0.375388	0.12108	0.191882	UP_TGF
CHD3	3	5533.51	1.13115	0.189942	5.95525	2.59672e-09	2.23804e-08	0.0115653	0.682946	0.0437964	0.261692	UP_TGF
FOXS1	3	58.2182	2.35817	0.396446	5.94828	2.70969e-09	2.33048e-08	0.00295657	0.704643	0.16084	0.13156	UP_TGF
ATXN1	3	928.759	1.5705	0.264805	5.93076	3.01543e-09	2.58117e-08	0.0406155	0.498556	0.0964189	0.36441	UP_TGF
NAV1	3	5010.6	1.45486	0.245327	5.93027	3.02432e-09	2.58742e-08	0.0222397	0.547857	0.114983	0.31492	UP_TGF
NAP1L1	3	11724.8	0.769028	0.129766	5.92625	3.09931e-09	2.64741e-08	0.0208047	0.640244	0.0732225	0.265729	UP_TGF
CYP1B1	3	1094.87	2.25342	0.380932	5.91555	3.3077e-09	2.81803e-08	0.114999	0.665308	0.142894	0.0767985	UP_TGF
CD80	3	70.6886	-2.88297	0.488325	-5.9038	3.55218e-09	3.01372e-08	0.00943588	0.902396	0.0149839	0.0731838	UP_BMP
YIPF6	3	1791.85	-0.707244	0.120001	-5.89367	3.777e-09	3.19448e-08	0.02424	0.659011	0.136346	0.180403	UP_BMP
GHR	3	1216.8	-0.995254	0.169262	-5.87997	4.10336e-09	3.4669e-08	0.0377942	0.493202	0.341882	0.127121	UP_BMP
PDXDC1	3	7432.11	-0.914216	0.155484	-5.87981	4.10748e-09	3.46858e-08	0.0572065	0.655208	0.273315	0.0142709	UP_BMP
MINDY1	3	370.465	1.02938	0.175077	5.8796	4.11254e-09	3.47106e-08	0.13614	0.715097	0.0540015	0.0947615	UP_TGF
SORCS2	3	1422.83	1.44517	0.245831	5.87873	4.13436e-09	3.48767e-08	0.277772	0.400955	0.211005	0.110267	UP_TGF
TMEM141	3	654.377	-1.09979	0.187559	-5.86367	4.52739e-09	3.80936e-08	0.0746239	0.512472	0.104031	0.308873	UP_BMP
PSMD14	3	1242.03	-1.0779	0.183943	-5.85999	4.62901e-09	3.88484e-08	0.0072988	0.692442	0.133159	0.167101	UP_BMP
MYL3	3	363.4	-1.34321	0.229353	-5.85652	4.72676e-09	3.96076e-08	0.182338	0.503265	0.028471	0.285926	UP_BMP
LPAR1	3	3643.01	-0.803101	0.137252	-5.85128	4.8779e-09	4.08111e-08	0.00361878	0.789326	0.0620758	0.144979	UP_BMP
PHACTR4	3	2001.83	0.738154	0.126271	5.8458	5.04138e-09	4.20278e-08	0.434959	0.387383	0.0437575	0.1339	UP_TGF
MYSM1	3	1325.4	-1.17137	0.200671	-5.83728	5.30584e-09	4.41873e-08	0.0928653	0.717147	0.050221	0.139767	UP_BMP
PARP6	3	1941.09	0.849237	0.145654	5.83051	5.52598e-09	4.59268e-08	0.264131	0.448488	0.138829	0.148551	UP_TGF
OLA1	3	1636.59	-0.77161	0.132427	-5.82668	5.65416e-09	4.69203e-08	0.198744	0.542241	0.131046	0.12797	UP_BMP
FBXL2	3	1212.25	-0.919903	0.159504	-5.76727	8.05679e-09	6.60179e-08	0.264291	0.349776	0.285406	0.100528	UP_BMP
GSTO2	3	172.902	-1.71598	0.297972	-5.75886	8.46833e-09	6.90775e-08	0.0312436	0.807817	0.136781	0.0241579	UP_BMP
IL2RG	3	95.6617	2.11463	0.368559	5.73756	9.60479e-09	7.78413e-08	0.000254511	0.82324	0.0972897	0.0792159	UP_TGF
WWC3	3	1897.37	0.725821	0.126766	5.72566	1.03031e-08	8.3211e-08	0.0592459	0.684924	0.160321	0.0955095	UP_TGF
EDIL3	3	6447.91	0.961621	0.168252	5.71537	1.09467e-08	8.82345e-08	0.412371	0.33684	0.00805609	0.242733	UP_TGF
SQLE	3	5509.67	-1.15282	0.202273	-5.69936	1.20258e-08	9.63599e-08	0.0175663	0.402846	0.16285	0.416737	UP_BMP
TMBIM1	3	4711.72	0.957361	0.168078	5.69594	1.22694e-08	9.82151e-08	0.167067	0.54673	0.0778554	0.208347	UP_TGF
RTEL1-TNFRSF6B	3	470.671	1.2555	0.220461	5.69486	1.23475e-08	9.87097e-08	0.00655932	0.51836	0.191381	0.2837	UP_TGF
KIF1A	3	745.095	1.98533	0.350433	5.66536	1.46714e-08	1.16244e-07	0.24208	0.465775	0.0678801	0.224265	UP_TGF
CLK1	3	2939.46	0.966628	0.171296	5.64302	1.67093e-08	1.31496e-07	0.0402303	0.480973	0.453425	0.0253722	UP_TGF
TRIM14	3	320.276	-1.18888	0.211897	-5.61065	2.01566e-08	1.57258e-07	0.0640453	0.695829	0.0213796	0.218746	UP_BMP
HHAT	3	759.779	1.05176	0.187611	5.60606	2.06987e-08	1.61333e-07	0.0116379	0.431185	0.556833	0.000344156	UP_TGF
CX3CL1	3	270.341	1.30058	0.232283	5.59913	2.15431e-08	1.67275e-07	0.204207	0.677753	0.0490688	0.0689713	UP_TGF
SIX4	3	1115.57	0.903509	0.161401	5.5979	2.16961e-08	1.68382e-07	0.00471069	0.51601	0.329941	0.149339	UP_TGF
MINK1	3	2854.35	0.869368	0.155467	5.59197	2.24507e-08	1.73743e-07	0.0222435	0.541841	0.143416	0.292499	UP_TGF
ARL4C	3	259.71	2.34726	0.420269	5.58514	2.3351e-08	1.80196e-07	0.0819836	0.44025	0.303878	0.173889	UP_TGF
PAMR1	3	119.172	-1.78872	0.320357	-5.58351	2.35707e-08	1.81633e-07	0.178425	0.433728	0.345175	0.0426724	UP_BMP
RTEL1	3	466.523	1.02286	0.183212	5.58295	2.36473e-08	1.82138e-07	5.50645e-05	0.600778	0.15207	0.247097	UP_TGF
C11orf49	3	826.343	-0.899709	0.161321	-5.57715	2.44496e-08	1.87873e-07	0.12526	0.690033	0.140817	0.0438895	UP_BMP
TMEM44	3	495.87	0.92884	0.167004	5.5618	2.67012e-08	2.04308e-07	0.0468927	0.57557	0.179751	0.197786	UP_TGF
MRNIP	3	1353.19	1.19065	0.214684	5.54603	2.92221e-08	2.22033e-07	0.13255	0.437803	0.354199	0.0754482	UP_TGF
AMD1	3	1828.77	-0.994481	0.179764	-5.53213	3.16358e-08	2.39146e-07	0.150577	0.322793	0.456257	0.0703735	UP_BMP
TXN	3	2412.85	-1.00904	0.182523	-5.52831	3.23338e-08	2.43971e-07	0.0296981	0.544066	0.322132	0.104104	UP_BMP
GOLGA2	3	6450.28	0.719045	0.131509	5.46763	4.56094e-08	3.35746e-07	0.282671	0.379418	0.102246	0.235665	UP_TGF
IQSEC1	3	10702.6	-0.873335	0.160183	-5.45212	4.97742e-08	3.6345e-07	0.0493203	0.334773	0.439698	0.176209	UP_BMP
CDK1	3	361.389	1.34574	0.247701	5.43292	5.54402e-08	4.02658e-07	0.0219792	0.410417	0.188622	0.378982	UP_TGF
IGFBP7-AS1	3	37.2297	2.68491	0.495331	5.42043	5.94556e-08	4.29525e-07	0.0296197	0.629322	0.145199	0.195859	UP_TGF
GAS2L1	3	425.684	1.09784	0.202683	5.41651	6.07736e-08	4.38269e-07	0.317032	0.332355	0.120654	0.229959	UP_TGF
TUBB	3	5631.13	-1.40355	0.259153	-5.41592	6.09734e-08	4.39515e-07	0.0194742	0.570069	0.23823	0.172227	UP_BMP
HFE	3	1289.75	-1.40703	0.26034	-5.40461	6.49498e-08	4.66528e-07	0.0488715	0.494046	0.00652883	0.450554	UP_BMP
YWHAE	3	7700.08	-0.782787	0.145069	-5.39595	6.8163e-08	4.88531e-07	0.040829	0.654032	0.0969065	0.208232	UP_BMP
ADCK2	3	472.654	0.950922	0.176389	5.39105	7.00467e-08	5.00711e-07	0.143647	0.586002	0.0425666	0.227784	UP_TGF
RGS22	3	168.873	-1.67919	0.311523	-5.39027	7.03534e-08	5.02683e-07	0.141457	0.462454	0.28638	0.109709	UP_BMP
SLC25A29	3	888.882	1.42386	0.264761	5.37792	7.53494e-08	5.37673e-07	8.06441e-06	0.854728	0.138498	0.00676549	UP_TGF
LARP1	3	9784.13	-0.636849	0.119031	-5.35029	8.78119e-08	6.21702e-07	0.00763384	0.764915	0.121405	0.106047	UP_BMP
MBOAT1	3	543.69	-0.924732	0.172987	-5.34566	9.00877e-08	6.36708e-07	0.145803	0.817779	0.0317988	0.00461915	UP_BMP
PLEKHA1	3	1803.85	0.83792	0.156911	5.3401	9.28941e-08	6.5569e-07	0.014055	0.835167	0.0196937	0.131084	UP_TGF
ARTN	3	29.1991	3.10285	0.583389	5.31867	1.0453e-07	7.33688e-07	0.222501	0.618843	0.148188	0.0104682	UP_TGF
GLYR1	3	2474.85	-0.847192	0.159634	-5.30709	1.11391e-07	7.77021e-07	0.0471014	0.839245	0.0734689	0.0401843	UP_BMP
ATP13A3	3	2801.1	-0.924414	0.174201	-5.30659	1.11693e-07	7.78604e-07	0.269514	0.438473	0.232709	0.0593036	UP_BMP
LDB3	3	160.025	-1.40367	0.264608	-5.30472	1.12844e-07	7.85279e-07	0.195684	0.341987	0.456592	0.00573732	UP_BMP
CACNB3	3	536.792	1.37681	0.260421	5.28686	1.24434e-07	8.62255e-07	0.000105981	0.447538	0.511902	0.040454	UP_TGF
EXTL1	3	1267.05	1.49819	0.283539	5.28388	1.26475e-07	8.75284e-07	0.0652653	0.357839	0.506488	0.0704077	UP_TGF
ALG13	3	2286.67	0.73076	0.138885	5.26162	1.42791e-07	9.81116e-07	0.318579	0.514817	0.080575	0.0860291	UP_TGF
SYNE3	3	252.342	1.28195	0.243975	5.25444	1.48474e-07	1.01845e-06	0.0106551	0.587077	0.385801	0.0164665	UP_TGF
HSF4	3	222.725	2.05757	0.391733	5.25247	1.50069e-07	1.02723e-06	0.0296331	0.723109	0.218125	0.0291321	UP_TGF
CACNB2	3	94.6835	1.73216	0.330712	5.23768	1.6261e-07	1.1098e-06	0.229668	0.572217	0.104364	0.0937522	UP_TGF
MAPRE2	3	1553.57	-0.87215	0.166522	-5.23745	1.62814e-07	1.11073e-06	0.00668893	0.724133	0.256011	0.0131673	UP_BMP
SRRT	3	1956.95	0.721385	0.137811	5.23459	1.65347e-07	1.12707e-06	0.104411	0.736172	0.0241669	0.13525	UP_TGF
GDI1	3	3266.04	0.69147	0.132346	5.22473	1.74405e-07	1.18386e-06	0.0189933	0.587424	0.149685	0.243897	UP_TGF
ZNF385D	3	1283.38	0.972409	0.186629	5.21039	1.88449e-07	1.276e-06	0.18928	0.509438	0.102868	0.198414	UP_TGF
TMEM97	3	1361.66	-1.00748	0.193855	-5.19709	2.02435e-07	1.36391e-06	0.0914298	0.462549	0.34723	0.098792	UP_BMP
LAYN	3	734.505	1.59964	0.308016	5.19338	2.06515e-07	1.38967e-06	0.233481	0.525938	0.0385375	0.202043	UP_TGF
CARD19	3	679.714	0.940511	0.18153	5.18101	2.20686e-07	1.47771e-06	0.207132	0.361016	0.29078	0.141072	UP_TGF
SLPI	3	1180.65	-3.29121	0.635531	-5.17867	2.23473e-07	1.49514e-06	0.220048	0.677786	0.0874072	0.0147583	UP_BMP
TAB2	3	3762.29	-0.772485	0.14925	-5.17578	2.2696e-07	1.51598e-06	0.209836	0.486141	0.159956	0.144067	UP_BMP
RAD9A	3	301.252	1.19196	0.230347	5.17464	2.28353e-07	1.52404e-06	0.125329	0.525904	0.339057	0.00970964	UP_TGF
ASTN1	3	27.7563	3.70385	0.715915	5.17358	2.29652e-07	1.53145e-06	0.335204	0.476503	0.00567404	0.18262	UP_TGF
PSMA6	3	1615.83	-0.710559	0.137508	-5.16742	2.37351e-07	1.57634e-06	0.0167877	0.851655	0.111773	0.019784	UP_BMP
RHBDF1	3	1716.11	0.796964	0.15567	5.11957	3.06239e-07	2.01254e-06	0.141326	0.338185	0.371718	0.148772	UP_TGF
STAT1	3	2524.9	-0.996264	0.194894	-5.11183	3.19047e-07	2.08996e-06	0.131321	0.467035	0.236625	0.165019	UP_BMP
IP6K3	3	124.663	1.44568	0.283748	5.09493	3.48864e-07	2.27614e-06	0.00223215	0.841976	0.053603	0.102189	UP_TGF
JAZF1	3	1231.44	-0.937071	0.184014	-5.09239	3.53573e-07	2.30409e-06	0.326304	0.37578	0.0761238	0.221792	UP_BMP
MCMBP	3	1160.01	0.692418	0.13612	5.08684	3.64086e-07	2.36692e-06	0.0264479	0.539804	0.228284	0.205464	UP_TGF
ELOC	3	1049.7	-0.729957	0.143621	-5.08254	3.72419e-07	2.41339e-06	0.0743239	0.594289	0.209866	0.121521	UP_BMP
PLXNB1	3	5692.19	-1.04438	0.205871	-5.07296	3.91666e-07	2.53308e-06	0.152253	0.666512	0.150715	0.0305194	UP_BMP
TGFBR1	3	3875.01	0.89258	0.176014	5.07107	3.95594e-07	2.55747e-06	0.224389	0.479084	0.177651	0.118877	UP_TGF
LRRN1	3	1944.49	-1.0808	0.213758	-5.05616	4.27784e-07	2.74922e-06	0.0181159	0.970719	0.0070721	0.00409304	UP_BMP
TUBA4A	3	257.111	1.55887	0.308555	5.05215	4.3687e-07	2.80319e-06	0.143974	0.610989	0.0889134	0.156124	UP_TGF
PRSS53	3	426.166	1.37054	0.271386	5.05014	4.41494e-07	2.82952e-06	0.0566256	0.782601	0.0790928	0.0816809	UP_TGF
SPR	3	329.033	-1.32548	0.26365	-5.0274	4.97166e-07	3.16764e-06	0.0154234	0.862912	0.0267155	0.0949493	UP_BMP
IRAK3	3	626.211	1.04264	0.208471	5.00138	5.69212e-07	3.60133e-06	0.0372608	0.482548	0.180052	0.300139	UP_TGF
ZBED1	3	2172.97	-0.825781	0.165155	-5.00005	5.73156e-07	3.62487e-06	0.0794547	0.780365	0.0122085	0.127972	UP_BMP
KDM5A	3	2209.42	-0.824618	0.165168	-4.99261	5.9568e-07	3.75857e-06	0.00290259	0.762271	0.0280818	0.206745	UP_BMP
ING5	3	863.037	0.801131	0.16081	4.98186	6.29749e-07	3.95669e-06	0.00216707	0.63569	0.27578	0.0863623	UP_TGF
CLIP4	3	893.936	-1.0851	0.218017	-4.97714	6.45308e-07	4.04509e-06	0.127154	0.808274	0.0271109	0.0374607	UP_BMP
TM4SF1	3	2564.81	1.0836	0.217843	4.97422	6.55096e-07	4.10171e-06	0.151847	0.733816	0.112328	0.00200877	UP_TGF
ABTB1	3	450.224	1.00944	0.203189	4.96798	6.7653e-07	4.22132e-06	0.31168	0.560812	0.000564784	0.126942	UP_TGF
ARID1B	3	2646.75	0.620388	0.124907	4.96681	6.80646e-07	4.24537e-06	0.0352872	0.337181	0.461794	0.165738	UP_TGF
MEGF10	3	1368.08	3.59919	0.725631	4.96007	7.04666e-07	4.38848e-06	0.0861417	0.507241	0.120152	0.286465	UP_TGF
WDR54	3	172.841	1.79975	0.365388	4.92557	8.41146e-07	5.20266e-06	0.0997546	0.42587	0.172388	0.301987	UP_TGF
TSKU	3	3886.95	-0.812413	0.165065	-4.92177	8.57662e-07	5.29075e-06	0.25358	0.372844	0.157721	0.215855	UP_BMP
LMNB1	3	297.264	1.30402	0.264976	4.92128	8.59779e-07	5.2998e-06	5.6531e-05	0.652246	0.345926	0.00177163	UP_TGF
ERGIC1	3	8086	-0.676277	0.137635	-4.91354	8.94461e-07	5.5011e-06	0.00340314	0.534073	0.084414	0.37811	UP_BMP
STOX2	3	266.602	-1.516	0.309492	-4.89836	9.66379e-07	5.9144e-06	0.120776	0.565171	0.149708	0.164346	UP_BMP
LRRC17	3	413.664	0.997571	0.203989	4.89031	1.00676e-06	6.13848e-06	0.0526197	0.411195	0.443024	0.0931615	UP_TGF
SENP2	3	2426.55	-0.754957	0.154515	-4.88598	1.02915e-06	6.26329e-06	0.168378	0.426839	0.271705	0.133078	UP_BMP
SEC23IP	3	2273.82	-1.01785	0.208615	-4.87906	1.06594e-06	6.46305e-06	0.0478996	0.618133	0.306835	0.0271325	UP_BMP
GPRASP1	3	1470.57	0.945126	0.194288	4.86456	1.14709e-06	6.93704e-06	0.448557	0.438555	0.0638776	0.049011	UP_TGF
PSMG4	3	498.601	-0.757023	0.156154	-4.84793	1.24758e-06	7.50832e-06	0.090587	0.759328	0.0451982	0.104887	UP_BMP
TMEM109	3	1590.56	0.948419	0.195639	4.8478	1.24837e-06	7.50832e-06	0.289111	0.503637	0.14698	0.0602724	UP_TGF
PIR	3	663.749	-0.881803	0.182598	-4.8292	1.3708e-06	8.1896e-06	0.00426771	0.788119	0.110447	0.0971659	UP_BMP
HEATR1	3	1437.87	-0.6905	0.143544	-4.81038	1.50647e-06	8.92816e-06	0.140088	0.340162	0.355238	0.164513	UP_BMP
SIRT5	3	354.45	-0.878716	0.183494	-4.78881	1.67773e-06	9.88922e-06	0.185065	0.500066	0.0377513	0.277118	UP_BMP
VPS51	3	1742.93	0.867281	0.181228	4.78559	1.70485e-06	1.00382e-05	0.0204388	0.535884	0.252305	0.191372	UP_TGF
LBR	3	660.771	1.31766	0.275691	4.77947	1.75757e-06	1.03262e-05	1.15519e-07	0.798129	0.124263	0.0776087	UP_TGF
ADAM9	3	1963.04	0.795682	0.16658	4.77658	1.78302e-06	1.04569e-05	0.0022054	0.457089	0.422801	0.117904	UP_TGF
FOXJ2	3	1303.96	0.808097	0.169863	4.75733	1.96166e-06	1.1451e-05	0.0329582	0.516174	0.450534	0.000334318	UP_TGF
MRPL3	3	2285.37	-0.644826	0.135627	-4.7544	1.99033e-06	1.16059e-05	0.00436472	0.570845	0.423504	0.00128549	UP_BMP
SMCO4	3	160.68	1.09673	0.231089	4.74592	2.07565e-06	1.20602e-05	0.110059	0.558757	0.11097	0.220214	UP_TGF
TNNC1	3	58.4627	-1.77422	0.375364	-4.72666	2.2824e-06	1.31723e-05	0.141425	0.654347	0.195374	0.00885389	UP_BMP
ZNF32	3	426.082	0.843474	0.178557	4.72384	2.31435e-06	1.33425e-05	0.146614	0.619372	0.165198	0.0688157	UP_TGF
APOBEC3C	3	220.915	-0.986819	0.20896	-4.72252	2.32944e-06	1.34248e-05	0.00271935	0.59793	0.0861139	0.313236	UP_BMP
TWIST2	3	47.8609	1.98493	0.420537	4.71998	2.35872e-06	1.35647e-05	0.336274	0.407114	0.221935	0.0346767	UP_TGF
CPN2	3	30.4029	-2.42118	0.513344	-4.71648	2.39962e-06	1.37757e-05	0.00725964	0.868558	0.0821724	0.0420098	UP_BMP
OGFOD1	3	1472.44	-0.717614	0.152301	-4.71181	2.45525e-06	1.40751e-05	0.198817	0.376186	0.335851	0.0891463	UP_BMP
REEP2	3	219.553	1.35749	0.289002	4.69717	2.6379e-06	1.50429e-05	0.0970402	0.683323	0.011495	0.208141	UP_TGF
RCC1	3	1229.14	-0.672157	0.14326	-4.69187	2.70722e-06	1.54005e-05	0.000133986	0.439399	0.404191	0.156276	UP_BMP
COBL	3	116.162	2.93669	0.626649	4.68633	2.78141e-06	1.58115e-05	0.191713	0.719517	0.00863195	0.0801384	UP_TGF
PAM	3	10139.2	-0.678971	0.145288	-4.67328	2.96423e-06	1.67514e-05	0.0354781	0.638794	0.113933	0.211795	UP_BMP
NEIL2	3	307.417	0.84364	0.18082	4.66564	3.07657e-06	1.73142e-05	0.142495	0.718585	0.0852947	0.0536252	UP_TGF
ADGRB2	3	221.07	1.56974	0.338911	4.63171	3.62662e-06	2.02213e-05	0.154841	0.661005	0.160321	0.0238336	UP_TGF
SERGEF	3	283.098	0.940762	0.203138	4.63116	3.63628e-06	2.02682e-05	0.0567338	0.560144	0.372224	0.0108977	UP_TGF
ST3GAL2	3	931.978	0.795973	0.172389	4.61732	3.88725e-06	2.15638e-05	0.000322602	0.602904	0.283365	0.113408	UP_TGF
MVP	3	1115.01	0.890318	0.19338	4.60398	4.14484e-06	2.28837e-05	0.243008	0.465009	0.0332536	0.25873	UP_TGF
ZNF83	3	1358.38	0.929252	0.202769	4.58282	4.58753e-06	2.51997e-05	0.277594	0.458662	0.231918	0.0318265	UP_TGF
PPP1R9B	3	1815.68	0.687631	0.150284	4.57555	4.7497e-06	2.60291e-05	0.00174436	0.418432	0.51921	0.0606135	UP_TGF
DPYSL2	3	3865.48	0.937927	0.205376	4.56687	4.95062e-06	2.70756e-05	0.0889911	0.514223	0.0136538	0.383132	UP_TGF
PCDH10	3	1153.29	1.22313	0.268035	4.56331	5.03538e-06	2.75206e-05	0.00363413	0.923627	0.0234868	0.049252	UP_TGF
HAPLN2	3	21.9069	-2.96683	0.650766	-4.55897	5.14046e-06	2.80573e-05	0.061653	0.629825	0.191263	0.117259	UP_BMP
C19orf57	3	37.5249	1.94635	0.426963	4.55859	5.1498e-06	2.80895e-05	0.00176477	0.598115	0.0857324	0.314388	UP_TGF
GNG5	3	1191.08	-0.753794	0.165438	-4.55634	5.20521e-06	2.83512e-05	0.159364	0.724088	0.0169837	0.0995642	UP_BMP
KCNG3	3	20.7902	-3.24659	0.713942	-4.54742	5.43085e-06	2.94843e-05	0.129493	0.685219	0.00329981	0.181989	UP_BMP
C11orf95	3	2087.64	0.657673	0.144852	4.5403	5.61751e-06	3.04268e-05	0.023916	0.678307	0.127004	0.170773	UP_TGF
CCDC93	3	1243.55	0.736585	0.162948	4.52038	6.17295e-06	3.32036e-05	0.0315556	0.873982	0.0265461	0.0679163	UP_TGF
KCNK1	3	536.246	-1.00967	0.223833	-4.51082	6.45782e-06	3.46215e-05	0.0272317	0.578119	0.0558668	0.338782	UP_BMP
PCSK4	3	88.2637	1.75986	0.39154	4.49472	6.96615e-06	3.71148e-05	0.158582	0.55387	0.178345	0.109204	UP_TGF
SLCO4A1	3	102.386	2.79629	0.622597	4.49134	7.07779e-06	3.76604e-05	0.265403	0.618487	0.0601382	0.0559711	UP_TGF
SPP1	3	2022.06	-4.30758	0.960605	-4.48424	7.31736e-06	3.88717e-05	0.201726	0.587376	0.191712	0.0191852	UP_BMP
MNT	3	895.986	0.759871	0.169602	4.48031	7.45336e-06	3.95555e-05	0.00851924	0.424959	0.169872	0.396649	UP_TGF
ARHGAP22	3	136.817	1.26235	0.282626	4.46653	7.95003e-06	4.19863e-05	0.00699303	0.724191	0.137689	0.131126	UP_TGF
BRD2	3	2873.26	0.547412	0.122615	4.46447	8.02656e-06	4.2363e-05	0.0593227	0.570324	0.0917402	0.278613	UP_TGF
CAMK2D	3	2427.74	-0.904346	0.202752	-4.46036	8.18227e-06	4.31429e-05	0.000127965	0.46898	0.149895	0.380997	UP_BMP
CDCA5	3	176.528	1.13622	0.254765	4.45988	8.20058e-06	4.32254e-05	0.0221362	0.698164	0.198073	0.0816268	UP_TGF
NHLRC2	3	1241.97	-0.762662	0.171037	-4.45905	8.23252e-06	4.33675e-05	0.00663403	0.663858	0.21477	0.114738	UP_BMP
QPRT	3	2510.09	-0.898239	0.201456	-4.45875	8.24405e-06	4.34124e-05	0.264052	0.701711	0.000736925	0.0334998	UP_BMP
NOP16	3	349.876	-1.31142	0.29459	-4.45168	8.52016e-06	4.47364e-05	0.00337947	0.851775	0.13116	0.0136853	UP_BMP
TRMT61A	3	506.546	-1.08824	0.245378	-4.43495	9.20941e-06	4.8092e-05	0.128815	0.384188	0.456183	0.0308132	UP_BMP
SLC12A4	3	3537	0.943841	0.213434	4.42217	9.77126e-06	5.07819e-05	0.101405	0.499012	0.393257	0.00632615	UP_TGF
ORM2	3	46.5703	-3.4821	0.78899	-4.41337	1.01774e-05	5.2674e-05	0.0446706	0.84152	0.0130416	0.100768	UP_BMP
NPB	3	41.2817	-2.0298	0.461266	-4.40049	1.08006e-05	5.56697e-05	0.00996203	0.551227	0.0495545	0.389257	UP_BMP
RGS4	3	90.0945	-2.37894	0.542539	-4.38483	1.16075e-05	5.94527e-05	0.213568	0.479737	0.229115	0.0775805	UP_BMP
TMEM200B	3	1021.36	-0.843296	0.192655	-4.37723	1.20197e-05	6.13714e-05	0.0799271	0.680844	0.00975504	0.229474	UP_BMP
GATM	3	58.094	-1.76666	0.403634	-4.37689	1.20383e-05	6.14467e-05	0.114259	0.590801	0.290562	0.00437896	UP_BMP
ARHGAP28	3	1169.59	-0.693724	0.159343	-4.35366	1.33882e-05	6.77855e-05	0.0475199	0.598986	0.223942	0.129552	UP_BMP
RTL5	3	685.217	0.990317	0.227765	4.34798	1.37399e-05	6.9415e-05	0.0174859	0.535116	0.211838	0.235561	UP_TGF
TNPO1	3	3232.97	-0.820473	0.188999	-4.34114	1.41743e-05	7.15208e-05	0.00881362	0.403137	0.508613	0.0794364	UP_BMP
SEMA4G	3	363.414	-1.32589	0.306451	-4.32661	1.51424e-05	7.60762e-05	0.298959	0.364349	0.260132	0.0765598	UP_BMP
LRRC8D	3	455.331	0.91831	0.212928	4.31277	1.61224e-05	8.06762e-05	0.140754	0.581646	0.00875701	0.268842	UP_TGF
WDR6	3	5002.14	0.566675	0.131535	4.30817	1.64609e-05	8.21426e-05	0.257524	0.487684	0.033264	0.221528	UP_TGF
IL20RB	3	69.5789	-1.51525	0.351945	-4.30535	1.66718e-05	8.31195e-05	0.176482	0.680459	0.0274751	0.115584	UP_BMP
NPAS3	3	451.621	0.750796	0.17456	4.30108	1.6997e-05	8.46113e-05	0.084129	0.633577	0.197823	0.0844714	UP_TGF
LYPD6	3	48.412	-2.26671	0.527863	-4.29414	1.75375e-05	8.71155e-05	0.0368069	0.382296	0.407093	0.173804	UP_BMP
PRSS16	3	30.3312	-2.53979	0.593013	-4.28285	1.84516e-05	9.13498e-05	0.0224814	0.642705	0.234506	0.100307	UP_BMP
PNMT	3	109.862	-1.46487	0.342103	-4.28196	1.85255e-05	9.166e-05	0.0581203	0.716579	0.0239773	0.201324	UP_BMP
NFYB	3	937.612	0.968389	0.226722	4.27127	1.94365e-05	9.57029e-05	0.362447	0.363322	0.0350137	0.239217	UP_TGF
OSBPL7	3	385.881	0.781796	0.183308	4.26493	1.99961e-05	9.81909e-05	0.215559	0.564749	0.107883	0.111809	UP_TGF
PSMA3	3	1133.54	-0.601162	0.141466	-4.24951	2.14241e-05	0.000104511	0.0393822	0.592937	0.364147	0.00353329	UP_BMP
TCP11L2	3	340.003	0.817418	0.192663	4.24273	2.20813e-05	0.000107427	0.177733	0.615707	0.115901	0.0906595	UP_TGF
TSC22D1	3	9661.92	0.885079	0.209008	4.23466	2.28901e-05	0.000110996	0.0239103	0.62787	0.331275	0.0169451	UP_TGF
MSH5	3	280.459	0.89719	0.212341	4.22523	2.38695e-05	0.000115164	0.313659	0.337503	0.268609	0.080229	UP_TGF
STK10	3	1277.43	0.651853	0.154321	4.224	2.40001e-05	0.000115658	0.331976	0.475057	0.118108	0.0748588	UP_TGF
ITPK1	3	700.807	0.812771	0.192506	4.22205	2.4209e-05	0.000116595	0.042476	0.827713	0.117595	0.0122159	UP_TGF
MSL1	3	3269.77	0.579165	0.137185	4.22179	2.4237e-05	0.000116696	0.0489999	0.523701	0.378377	0.0489226	UP_TGF
FANCE	3	372.261	-0.742341	0.17591	-4.22	2.44301e-05	0.000117556	0.25519	0.491893	0.211076	0.0418413	UP_BMP
ABLIM1	3	548.418	1.02631	0.243498	4.21485	2.49949e-05	0.000120095	0.042796	0.457722	0.355214	0.144268	UP_TGF
AFAP1L1	3	155.328	-2.1836	0.518137	-4.21433	2.50519e-05	0.000120299	0.334791	0.449623	0.105531	0.110055	UP_BMP
FBXW9	3	171.854	-1.25069	0.297154	-4.20889	2.56631e-05	0.000122981	0.0549352	0.36852	0.515756	0.0607889	UP_BMP
SARM1	3	518.656	0.898792	0.214072	4.19855	2.68629e-05	0.000128202	0.0191409	0.922868	0.00690484	0.0510861	UP_TGF
SHROOM4	3	940.873	1.02465	0.244843	4.18491	2.85273e-05	0.00013559	0.196067	0.465593	0.0540647	0.284275	UP_TGF
DNAJC18	3	745.604	0.996287	0.238116	4.18405	2.86363e-05	0.000136029	0.0188713	0.661123	0.0771453	0.242861	UP_TGF
PDK4	3	3305.46	-2.59062	0.619263	-4.18339	2.87198e-05	0.000136386	0.166813	0.587357	0.0532175	0.192612	UP_BMP
PSMD1	3	2713.59	-0.645817	0.154608	-4.17712	2.95221e-05	0.000139992	0.131333	0.31248	0.449012	0.107175	UP_BMP
CYYR1	3	451.604	-1.33203	0.319892	-4.16401	3.127e-05	0.000147465	0.107299	0.669298	0.0141094	0.209294	UP_BMP
MSANTD3	3	604.457	0.956092	0.230388	4.14992	3.32588e-05	0.000156211	0.00734432	0.943462	0.0107965	0.0383977	UP_TGF
ZFHX3	3	7890.14	0.985944	0.23777	4.14664	3.37392e-05	0.000158239	0.184933	0.534786	0.043721	0.23656	UP_TGF
BNIP2	3	1651.3	-0.714749	0.172388	-4.14617	3.38085e-05	0.000158496	0.136861	0.528236	0.0655881	0.269315	UP_BMP
BTN3A2	3	150.955	1.05359	0.254273	4.14352	3.42019e-05	0.000160087	0.0276951	0.657422	0.212756	0.102127	UP_TGF
ENOX1	3	331.941	1.43286	0.346392	4.13654	3.52583e-05	0.000164559	0.0771703	0.745899	0.121667	0.0552636	UP_TGF
KIAA0895L	3	504.741	0.964389	0.233573	4.12885	3.64585e-05	0.000169529	0.00456681	0.705376	0.28906	0.000997963	UP_TGF
NAPRT	3	355.158	0.876756	0.212533	4.12527	3.70297e-05	0.000172087	0.0794235	0.441348	0.317173	0.162056	UP_TGF
KCNIP2	3	76.6798	1.70936	0.414698	4.12194	3.75691e-05	0.000174494	0.303279	0.4355	0.0332751	0.227945	UP_TGF
ZSWIM8	3	3498.64	0.609544	0.148022	4.11793	3.82292e-05	0.000177257	0.00373772	0.648385	0.336211	0.0116664	UP_TGF
ARNTL2	3	122.865	1.36881	0.333179	4.10833	3.98528e-05	0.000183948	0.340637	0.386348	0.0211312	0.251883	UP_TGF
STRN	3	1004.25	-0.616098	0.150007	-4.10714	4.00587e-05	0.000184742	0.435082	0.331459	0.00348392	0.229975	UP_BMP
PTTG1	3	232.11	1.37482	0.334813	4.10625	4.02138e-05	0.000185352	0.108856	0.390107	0.493467	0.00756902	UP_TGF
TAL1	3	41.47	2.46068	0.600363	4.09866	4.15554e-05	0.000191103	0.289752	0.47074	0.174829	0.0646785	UP_TGF
ENO2	3	1815.54	3.06753	0.748588	4.09776	4.17171e-05	0.000191793	0.306217	0.311779	0.333452	0.0485521	UP_TGF
HAND2	3	177.936	-2.11953	0.517337	-4.09699	4.18548e-05	0.000192317	0.078086	0.830697	0.076196	0.0150206	UP_BMP
LIF	3	45.7468	2.71618	0.666607	4.07463	4.60877e-05	0.000210598	0.06991	0.672653	0.118595	0.138843	UP_TGF
HLF	3	114.32	1.961	0.481872	4.06955	4.71037e-05	0.000214921	0.156636	0.41081	0.403574	0.0289802	UP_TGF
ITSN2	3	841.257	0.675697	0.1661	4.06801	4.74174e-05	0.00021611	0.0324978	0.603979	0.132659	0.230863	UP_TGF
HMGB2	3	1302.3	0.684566	0.168465	4.06356	4.83298e-05	0.000219961	0.0494326	0.690884	0.176353	0.08333	UP_TGF
LPAR4	3	1062.74	1.02318	0.251805	4.0634	4.83639e-05	0.000220035	0.36007	0.514065	0.03825	0.087615	UP_TGF
ADD3	3	2003.02	0.80026	0.1973	4.05605	4.99096e-05	0.000226455	0.0785743	0.620945	0.278556	0.0219254	UP_TGF
HELB	3	108.41	-1.05447	0.260076	-4.05448	5.02459e-05	0.000227537	0.088879	0.365918	0.509743	0.03546	UP_BMP
CWC15	3	182.586	0.935733	0.231765	4.03742	5.40417e-05	0.000243576	0.0653534	0.624504	0.273851	0.0362915	UP_TGF
TRAF5	3	462.256	0.927923	0.229839	4.03726	5.40782e-05	0.000243674	0.041997	0.642335	0.111409	0.204259	UP_TGF
POMT1	3	944.072	0.658996	0.163841	4.02216	5.76669e-05	0.000258771	0.0114736	0.852726	0.0797964	0.0560037	UP_TGF
P4HTM	3	623.029	0.882331	0.219507	4.01959	5.82987e-05	0.000261174	0.24379	0.548892	0.156317	0.0510004	UP_TGF
ADAM19	3	375.497	1.12126	0.278968	4.01932	5.83664e-05	0.000261406	0.0286534	0.591914	0.0901259	0.289306	UP_TGF
DPF3	3	26.2389	-2.08523	0.518869	-4.01879	5.84974e-05	0.000261921	0.202076	0.702776	0.0623732	0.0327748	UP_BMP
CLCF1	3	42.5249	1.75636	0.437421	4.01525	5.93819e-05	0.000265537	0.0373335	0.598597	0.0500614	0.314008	UP_TGF
TRIM47	3	1441.1	-0.86333	0.215958	-3.99767	6.39688e-05	0.000284542	0.0298215	0.745435	0.0144966	0.210247	UP_BMP
LMOD3	3	103.66	-1.80416	0.451315	-3.99756	6.39997e-05	0.000284602	0.0880665	0.672701	0.0253276	0.213905	UP_BMP
GSTT2	3	63.4665	1.37392	0.343749	3.99688	6.41837e-05	0.000285343	0.0271047	0.574099	0.187509	0.211287	UP_TGF
C6orf120	3	1351.56	-0.87857	0.219978	-3.99391	6.49934e-05	0.000288636	0.18834	0.499942	0.140904	0.170814	UP_BMP
ILKAP	3	541.702	0.619444	0.155207	3.99107	6.57754e-05	0.000291941	0.0210745	0.70652	0.186429	0.0859757	UP_TGF
NISCH	3	4877.65	0.626184	0.156947	3.98979	6.6132e-05	0.000293284	0.0647613	0.632514	0.100867	0.201858	UP_TGF
DBF4B	3	325.548	0.784013	0.196521	3.98947	6.62222e-05	0.000293604	0.0700123	0.528487	0.364269	0.0372313	UP_TGF
SMARCC1	3	2376.7	-0.505477	0.127128	-3.97612	7.00488e-05	0.000309308	0.273891	0.595363	0.0122531	0.118493	UP_BMP
TCEA2	3	737.8	0.739209	0.185941	3.97551	7.02288e-05	0.000309935	0.0173345	0.796561	0.0544275	0.131677	UP_TGF
LSM14B	3	923.596	0.573592	0.144398	3.97229	7.11836e-05	0.000313639	0.0451302	0.57647	0.346562	0.0318382	UP_TGF
CAMTA2	3	1174.5	0.778235	0.196168	3.96719	7.27254e-05	0.00031974	0.168946	0.627458	0.0334892	0.170107	UP_TGF
WNT3	3	402.745	-0.697535	0.17637	-3.95497	7.65457e-05	0.00033527	0.0112661	0.38531	0.52546	0.077964	UP_BMP
DMP1	3	106.012	-2.81593	0.712233	-3.95366	7.69642e-05	0.000337013	0.317238	0.378897	0.0772865	0.226578	UP_BMP
ATP2A3	3	288.696	1.54167	0.390595	3.94698	7.91443e-05	0.000345538	0.253796	0.534181	0.0594868	0.152537	UP_TGF
C2orf92	3	162.126	1.14585	0.290966	3.9381	8.21306e-05	0.000357046	0.31204	0.600463	0.0234549	0.0640424	UP_TGF
PRPF8	3	9880.2	0.525665	0.133705	3.93153	8.44068e-05	0.000365868	0.270468	0.443724	0.140051	0.145757	UP_TGF
GRAMD2B	3	844.715	-0.761807	0.194254	-3.9217	8.79273e-05	0.000379613	0.020222	0.675834	0.0453757	0.258569	UP_BMP
HNRNPLL	3	888.658	0.589029	0.150355	3.91758	8.94415e-05	0.000385334	0.0606501	0.656925	0.020606	0.261818	UP_TGF
GLRX3	3	1046.62	-0.555193	0.142338	-3.90053	9.59817e-05	0.000411012	0.348141	0.481149	0.0396856	0.131025	UP_BMP
ZBTB47	3	1799.66	0.618193	0.158722	3.89482	9.82716e-05	0.000420045	0.113341	0.689767	0.0205287	0.176364	UP_TGF
OR7E14P	3	41.3757	-1.78659	0.459365	-3.88925	0.000100554	0.000429236	0.0119752	0.785976	0.13053	0.0715185	UP_BMP
SIN3B	3	2533.08	0.598611	0.154591	3.87223	0.000107844	0.000457566	0.110283	0.54032	0.286377	0.0630196	UP_TGF
SBNO1	3	1865.67	-0.627068	0.162364	-3.86212	0.000112406	0.000475223	0.00346434	0.340949	0.531398	0.124188	UP_BMP
SAT2	3	956.551	0.556449	0.144182	3.85936	0.000113686	0.000480015	0.469079	0.416042	0.0113102	0.103568	UP_TGF
HNRNPDL	3	5421.24	0.540492	0.140097	3.858	0.00011432	0.000482441	0.0776501	0.752582	0.00977993	0.159988	UP_TGF
CLDN15	3	351.216	0.759606	0.19749	3.8463	0.000119916	0.0005041	0.467059	0.414199	0.047163	0.0715791	UP_TGF
NUFIP2	3	3164.39	-0.488915	0.127197	-3.84376	0.000121163	0.000508422	0.0283316	0.411131	0.5404	0.0201368	UP_BMP
NPTX1	3	108.353	2.18534	0.570739	3.82897	0.000128681	0.000537204	0.10848	0.428834	0.45099	0.0116953	UP_TGF
NOLC1	3	1850.29	-0.841683	0.220232	-3.8218	0.000132482	0.000551237	0.0225619	0.451187	0.0916003	0.434651	UP_BMP
BPNT1	3	828.738	-0.629793	0.165028	-3.81628	0.000135478	0.000563556	0.0900582	0.672095	0.109596	0.12825	UP_BMP
HIVEP1	3	934.759	-0.592116	0.155243	-3.81411	0.000136673	0.000568237	0.0905636	0.360257	0.504071	0.0451087	UP_BMP
MCRIP1	3	1039	0.741648	0.194542	3.81227	0.000137695	0.000572051	0.0700799	0.803932	0.0596626	0.0663256	UP_TGF
PAM16	3	335.17	-0.689016	0.181769	-3.79061	0.000150275	0.000619284	0.21261	0.51776	0.060984	0.208646	UP_BMP
WDR62	3	176.06	0.901335	0.238463	3.77977	0.000156971	0.000643278	0.110811	0.598704	0.218038	0.072447	UP_TGF
SMAD1	3	331.533	-0.69449	0.183749	-3.77956	0.000157106	0.000643592	0.18406	0.491186	0.16072	0.164034	UP_BMP
S1PR1	3	40.5924	-2.39268	0.633459	-3.77717	0.000158622	0.000649225	0.10318	0.73932	0.117475	0.040025	UP_BMP
TOM1L1	3	167.997	-1.00978	0.267472	-3.77527	0.000159835	0.000653863	0.0290194	0.457794	0.108412	0.404774	UP_BMP
TMEM87B	3	1223.84	0.915475	0.242541	3.77452	0.000160314	0.00065533	0.0500402	0.416306	0.124688	0.408966	UP_TGF
ANGPT2	3	431.583	-1.35388	0.359354	-3.76755	0.000164859	0.000672559	0.350551	0.435458	0.0999288	0.114062	UP_BMP
WARS2	3	329.901	-0.790002	0.209778	-3.76589	0.000165957	0.000676191	0.110434	0.656918	0.0400125	0.192635	UP_BMP
MYLPF	3	17.1599	-2.74951	0.730444	-3.76416	0.000167111	0.000680382	0.253584	0.421682	0.223477	0.101258	UP_BMP
C18orf25	3	550.208	-0.679837	0.181423	-3.74725	0.000178783	0.000725007	0.196489	0.576164	0.165238	0.0621085	UP_BMP
COG5	3	1505.19	-0.742336	0.198106	-3.74716	0.000178849	0.000725096	0.28842	0.503177	0.132673	0.0757296	UP_BMP
CIC	3	6926.11	0.578366	0.154792	3.73641	0.000186668	0.000753234	0.0750953	0.592374	0.320969	0.0115616	UP_TGF
GPC3	3	1099.3	-2.50311	0.670563	-3.73285	0.000189323	0.000762814	0.16325	0.436922	0.308514	0.0913137	UP_BMP
OFD1	3	767.839	0.673425	0.181032	3.71992	0.000199289	0.000799017	0.0132238	0.658916	0.0954324	0.232428	UP_TGF
SMARCD2	3	1507.66	0.473503	0.127512	3.7134	0.000204491	0.000817261	0.0624562	0.582632	0.105255	0.249657	UP_TGF
MRPL23	3	542.781	-0.67358	0.181653	-3.70806	0.000208856	0.000832868	0.147525	0.420117	0.363962	0.0683955	UP_BMP
STXBP6	3	66.9165	1.4318	0.386232	3.7071	0.000209643	0.000835804	0.0526696	0.659097	0.0396864	0.248547	UP_TGF
RRS1	3	276.934	-1.13584	0.306996	-3.69987	0.000215711	0.000857058	0.0364924	0.458033	0.202416	0.303059	UP_BMP
IKZF4	3	524.118	0.762463	0.206264	3.69654	0.000218556	0.000867728	0.0349257	0.934709	0.0160915	0.0142741	UP_TGF
NDUFA13	3	2055.13	-0.609661	0.164962	-3.69577	0.00021922	0.000870153	0.336658	0.422792	0.20158	0.038971	UP_BMP
M1AP	3	68.1864	1.17154	0.317068	3.69492	0.000219957	0.000872655	0.0180937	0.548881	0.334432	0.098593	UP_TGF
TLCD2	3	159.85	1.00773	0.273422	3.68562	0.000228144	0.000902716	0.127171	0.47015	0.256753	0.145926	UP_TGF
GFM1	3	1239.73	-0.596277	0.162185	-3.67653	0.000236427	0.000932095	0.0861983	0.778382	0.00905549	0.126365	UP_BMP
PPFIA3	3	201.46	1.3652	0.371628	3.67358	0.000239179	0.000941924	0.176417	0.58124	0.0611086	0.181235	UP_TGF
MAPK3	3	1479.93	0.622706	0.169614	3.67131	0.000241307	0.000949269	8.53811e-05	0.736197	0.212707	0.0510111	UP_TGF
CDYL	3	766.519	0.646875	0.176243	3.67035	0.000242216	0.000952616	0.125262	0.451048	0.320109	0.103581	UP_TGF
TSPAN31	3	1329.01	-0.580794	0.158338	-3.66807	0.000244392	0.000960479	0.336773	0.350659	0.278062	0.0345053	UP_BMP
GEMIN5	3	981.617	-0.639823	0.174601	-3.66449	0.000247836	0.00097331	0.044413	0.794386	0.0681999	0.0930015	UP_BMP
IL17RC	3	771.95	0.677234	0.18491	3.66251	0.00024976	0.000980156	0.252332	0.668142	0.0584736	0.0210527	UP_TGF
EN1	3	16.8746	-3.20475	0.875403	-3.66088	0.000251348	0.000985677	0.0282267	0.776342	0.0762175	0.119214	UP_BMP
ZMYND8	3	2469.56	0.512315	0.140043	3.65828	0.000253916	0.000995027	0.0131521	0.595304	0.0310959	0.360448	UP_TGF
RAPGEF5	3	104.318	1.46204	0.399689	3.65794	0.000254249	0.000996094	0.124745	0.473947	0.311761	0.0895463	UP_TGF
MFSD12	3	944.953	-0.798554	0.218346	-3.65729	0.000254898	0.000997437	0.133343	0.653301	0.124898	0.0884576	UP_BMP
CACNA2D4	3	79.1573	-1.12179	0.306999	-3.65406	0.000258122	0.00100957	0.112549	0.333893	0.39059	0.162968	UP_BMP
FUT4	3	661.857	0.55777	0.153116	3.64279	0.000269698	0.00105181	0.019904	0.718306	0.167118	0.0946714	UP_TGF
WASH3P	3	483.862	0.684175	0.187894	3.64129	0.000271276	0.00105645	0.270486	0.560399	0.0381962	0.130918	UP_TGF
GPRASP2	3	641.931	0.720964	0.198155	3.63838	0.000274361	0.00106643	0.11986	0.423651	0.372517	0.0839717	UP_TGF
NRK	3	15040.3	1.91482	0.526403	3.63756	0.000275238	0.00106933	0.141525	0.723882	0.0642856	0.0703076	UP_TGF
HSD17B12	3	3333.53	-0.453604	0.125495	-3.61453	0.000300898	0.00115989	0.0474317	0.347123	0.428435	0.177011	UP_BMP
PPP1R35	3	234.408	0.93403	0.260698	3.5828	0.000339928	0.00129624	0.0670145	0.321804	0.510782	0.1004	UP_TGF
AMOT	3	1173.92	-0.705577	0.197081	-3.58015	0.000343402	0.00130827	0.0050276	0.580618	0.386504	0.0278505	UP_BMP
TOMM22	3	867.574	-0.6661	0.186062	-3.57998	0.000343622	0.0013088	0.0550055	0.887472	0.050814	0.00670887	UP_BMP
CHFR	3	1374.54	-0.462406	0.130153	-3.55278	0.000381176	0.00143739	0.222731	0.746303	0.00479315	0.0261728	UP_BMP
PINK1	3	2865.98	-0.724861	0.204047	-3.55241	0.000381714	0.00143909	0.246576	0.517415	0.228708	0.00730018	UP_BMP
TNFAIP2	3	361.297	0.683084	0.192403	3.55027	0.000384839	0.00144953	0.0666431	0.677662	0.235811	0.0198836	UP_TGF
TTC39C	3	219.717	0.789628	0.222686	3.54592	0.000391244	0.00147059	0.335176	0.320953	0.272812	0.0710582	UP_TGF
SLC45A1	3	37.8967	1.87474	0.5304	3.53457	0.000408435	0.00152851	0.102687	0.554564	0.013219	0.329531	UP_TGF
SLC29A2	3	270.372	-0.960608	0.272225	-3.52873	0.000417563	0.00155945	0.274724	0.525901	0.172067	0.0273075	UP_BMP
ZNF486	3	101.681	1.11929	0.317722	3.52287	0.000426902	0.00159068	0.0247834	0.592193	0.151883	0.23114	UP_TGF
ACADVL	3	3882.92	0.830254	0.236323	3.51322	0.000442708	0.00164507	0.157801	0.75931	0.0062631	0.0766259	UP_TGF
ZNF195	3	376.675	-0.679671	0.193691	-3.50906	0.000449701	0.00166611	0.413011	0.516855	0.055419	0.0147147	UP_BMP
DUS1L	3	1203.08	-0.782078	0.223415	-3.50057	0.000464273	0.00171374	0.0361344	0.644107	0.0886343	0.231124	UP_BMP
FAM91A1	3	1041.12	-0.584803	0.167086	-3.50001	0.000465238	0.00171626	0.386119	0.398848	0.074259	0.140774	UP_BMP
COLCA2	3	21.7062	2.15339	0.616833	3.49105	0.000481126	0.00176887	0.0653941	0.669808	0.15667	0.108127	UP_TGF
RGS12	3	1056.09	0.740158	0.212323	3.48601	0.000490289	0.0017985	0.0468905	0.716493	0.140804	0.0958134	UP_TGF
CNOT3	3	1031.12	0.474712	0.13638	3.4808	0.000499926	0.0018297	0.0728901	0.668523	0.243678	0.0149089	UP_TGF
ZNF22	3	553.898	0.7306	0.210413	3.47221	0.000516193	0.00188166	0.313133	0.609112	0.020169	0.0575858	UP_TGF
FDFT1	3	5205.65	-0.704925	0.203401	-3.46569	0.000528878	0.00192382	0.130296	0.473486	0.314406	0.0818116	UP_BMP
SYT11	3	281.258	0.823936	0.237827	3.46443	0.000531354	0.00193217	0.0138734	0.4512	0.481531	0.0533953	UP_TGF
SLC8A1	3	122.82	1.42871	0.414338	3.44818	0.000564378	0.00204314	0.0213241	0.654459	0.254641	0.0695757	UP_TGF
DEF6	3	114.147	1.31695	0.382034	3.4472	0.000566439	0.00204969	0.124671	0.651249	0.17507	0.0490105	UP_TGF
CCDC57	3	1080.2	0.666484	0.19347	3.44489	0.000571293	0.00206497	0.00497103	0.774723	0.129711	0.0905949	UP_TGF
RRAS	3	1136.87	0.632805	0.183802	3.44286	0.000575599	0.00207869	0.197455	0.407584	0.339775	0.0551855	UP_TGF
BATF3	3	21.2289	2.04004	0.592826	3.44122	0.000579103	0.00208991	0.273867	0.486399	0.00408175	0.235652	UP_TGF
TMPRSS5	3	89.1603	-1.59771	0.464611	-3.43882	0.000584259	0.00210623	0.00680711	0.854443	0.041604	0.0971462	UP_BMP
DBNL	3	2442.24	-0.555317	0.161682	-3.43462	0.000593376	0.00213545	0.00454976	0.593645	0.0115393	0.390266	UP_BMP
MTSS1	3	317.623	-0.954375	0.278046	-3.43243	0.000598189	0.00215026	0.0730215	0.665532	0.081905	0.179541	UP_BMP
CSNK1D	3	2420.73	-0.547168	0.159726	-3.42566	0.000613312	0.0022022	0.0451727	0.332219	0.435795	0.186813	UP_BMP
CCDC9	3	432.074	0.62002	0.181008	3.42537	0.000613961	0.00220404	0.0203987	0.77063	0.0968258	0.112145	UP_TGF
SEC24A	3	2554.65	-0.683143	0.200064	-3.41461	0.000638725	0.00228689	0.233485	0.495717	0.195466	0.0753319	UP_BMP
TARBP1	3	963.519	-0.589718	0.172887	-3.41101	0.000647237	0.00231483	0.0228159	0.542369	0.427813	0.00700201	UP_BMP
PLEKHG6	3	44.3227	-1.71541	0.503296	-3.40835	0.000653573	0.0023339	0.112349	0.593271	0.166028	0.128353	UP_BMP
HNRNPUL1	3	6342.32	0.472362	0.138593	3.40828	0.00065374	0.00233399	0.077541	0.686906	0.137583	0.0979706	UP_TGF
PIH1D1	3	553.221	0.553713	0.162468	3.40815	0.000654061	0.00233462	0.337476	0.52931	0.114331	0.0188828	UP_TGF
ELK1	3	1274.66	-0.588857	0.173026	-3.40328	0.000665823	0.00237209	0.000361348	0.45149	0.509286	0.0388619	UP_BMP
NSMCE1	3	421.169	0.810706	0.238398	3.40064	0.00067229	0.00239183	0.131968	0.749949	0.0356571	0.0824264	UP_TGF
FAM131C	3	24.561	2.187	0.643938	3.39629	0.000683066	0.00242593	0.00170806	0.585925	0.141455	0.270911	UP_TGF
DEPP1	3	333.508	1.05729	0.311417	3.3951	0.000686037	0.00243383	0.341037	0.556838	0.00765812	0.0944661	UP_TGF
ZDHHC7	3	2100.86	-0.710779	0.209932	-3.38576	0.000709822	0.00251057	0.129415	0.511202	0.217645	0.141738	UP_BMP
FAM83G	3	482.9	0.709407	0.209783	3.38162	0.000720606	0.00254649	0.143079	0.482036	0.279327	0.0955578	UP_TGF
TRNP1	3	370.068	0.652397	0.193058	3.37929	0.000726742	0.00256595	0.174602	0.402354	0.273998	0.149046	UP_TGF
ST3GAL1	3	1627.57	-0.745045	0.220554	-3.37806	0.000729979	0.00257571	0.458096	0.481174	0.0174728	0.0432574	UP_BMP
DERL1	3	1967.92	-0.467628	0.138836	-3.36821	0.000756568	0.00266088	0.278252	0.431779	0.243096	0.0468728	UP_BMP
FKBP9	3	8492.34	-0.383757	0.114046	-3.36494	0.00076559	0.00268682	0.0348649	0.618354	0.298976	0.0478052	UP_BMP
TIGAR	3	162.71	-1.0565	0.314439	-3.35995	0.000779568	0.00273293	0.299039	0.395564	0.0424011	0.262995	UP_BMP
RHBDD1	3	545.49	-0.565338	0.168466	-3.35579	0.000791389	0.00276901	0.128563	0.468239	0.393699	0.00949976	UP_BMP
NUDT14	3	279.405	-0.755988	0.225457	-3.35314	0.000798996	0.00279203	0.166308	0.508443	0.0913462	0.233903	UP_BMP
MEAF6	3	919.484	0.515417	0.153924	3.34852	0.000812436	0.00283292	0.291897	0.511791	0.113216	0.0830954	UP_TGF
BEND3	3	149.174	-0.984788	0.294181	-3.34756	0.000815271	0.0028421	0.00044944	0.343483	0.479047	0.17702	UP_BMP
C1orf21	3	1643.43	0.709733	0.21209	3.34638	0.000818756	0.0028513	0.00157294	0.836639	0.0352374	0.12655	UP_TGF
DHRS4L2	3	387.094	-0.567389	0.169744	-3.34261	0.000829941	0.00288348	0.160995	0.543322	0.101397	0.194286	UP_BMP
KDM2B	3	825.866	0.491551	0.147906	3.3234	0.000889261	0.00307842	0.0376138	0.881392	0.0725408	0.00845302	UP_TGF
ACOX3	3	501.26	0.653588	0.197135	3.31544	0.000914991	0.00315876	0.0482086	0.731603	0.106543	0.113645	UP_TGF
TUBBP5	3	23.7387	-2.04857	0.618063	-3.31449	0.000918091	0.00316745	0.0729331	0.670426	0.216127	0.0405143	UP_BMP
KAT5	3	707.391	0.589543	0.178361	3.30534	0.000948624	0.0032645	0.0124402	0.636589	0.338578	0.012393	UP_TGF
PLPP6	3	280.565	-0.975266	0.295389	-3.30163	0.000961248	0.00330167	0.00076139	0.503355	0.0176818	0.478202	UP_BMP
C1GALT1C1	3	298.047	0.725269	0.219769	3.30014	0.000966368	0.00331716	0.000698457	0.953128	0.0288688	0.0173052	UP_TGF
AHCYL2	3	874.057	-0.686457	0.208263	-3.29611	0.000980351	0.00336232	0.25758	0.554794	0.0937468	0.0938796	UP_BMP
DAPP1	3	57.4939	1.90652	0.578733	3.29431	0.000986646	0.00338178	0.125687	0.446904	0.1357	0.291709	UP_TGF
LDLRAD3	3	1704.04	0.536426	0.163094	3.28906	0.00100524	0.00343468	0.155006	0.542957	0.190927	0.111109	UP_TGF
PLEKHH3	3	571.744	0.642687	0.1958	3.28236	0.00102941	0.00351138	0.312652	0.372111	0.0252705	0.289967	UP_TGF
EFNA3	3	199.974	1.23499	0.37658	3.27949	0.00103995	0.00354215	0.0334419	0.665025	0.289548	0.0119846	UP_TGF
S100A2	3	75.2778	1.86228	0.568694	3.27467	0.00105786	0.00359412	0.0964332	0.782992	0.0365879	0.0839872	UP_TGF
TRMT2B	3	430.216	0.57156	0.175126	3.2637	0.00109967	0.00372529	0.0370742	0.689978	0.00738584	0.265562	UP_TGF
UTRN	3	3145.92	-0.560987	0.1719	-3.26345	0.00110064	0.00372627	0.00255001	0.635878	0.0904185	0.271153	UP_BMP
CXXC4	3	52.0932	1.61054	0.493878	3.261	0.0011102	0.00375239	0.215035	0.627398	0.0234918	0.134076	UP_TGF
KCNK4	3	12.155	-2.56499	0.786559	-3.26103	0.00111008	0.00375239	0.00155669	0.565047	0.0372867	0.39611	UP_BMP
CHADL	3	3293.21	-0.77898	0.239011	-3.25919	0.00111732	0.0037741	0.000667356	0.554622	0.17372	0.27099	UP_BMP
PTPRJ	3	202.618	0.944607	0.289954	3.25778	0.00112289	0.00379056	0.00981896	0.690454	0.194461	0.105266	UP_TGF
ZSCAN16	3	24.274	1.77475	0.547282	3.24285	0.00118339	0.00397585	0.304618	0.658639	0.00250928	0.034233	UP_TGF
USP54	3	778.923	0.597713	0.184492	3.23977	0.00119626	0.0040133	0.462297	0.43925	0.0273499	0.0711027	UP_TGF
HIPK1	3	2524.21	-0.454103	0.140374	-3.23495	0.00121662	0.00407658	0.0234807	0.614583	0.360137	0.00179956	UP_BMP
ZC3H12A	3	160.128	0.937664	0.290452	3.2283	0.0012453	0.00416156	0.23073	0.397147	0.275149	0.0969737	UP_TGF
SAP30	3	872.696	-0.622229	0.192899	-3.22567	0.00125676	0.00419555	0.243738	0.508554	0.169459	0.0782497	UP_BMP
PTS	3	460.933	-0.614948	0.191087	-3.21815	0.0012902	0.00429576	0.181141	0.445387	0.360191	0.0132809	UP_BMP
TMEM131L	3	609.843	0.794496	0.248869	3.19242	0.00141086	0.00465658	0.000329413	0.880957	0.0487403	0.069973	UP_TGF
TMEM14C	3	1490.07	0.428638	0.134321	3.19115	0.00141709	0.00467481	0.0274199	0.693029	0.0441931	0.235358	UP_TGF
SMIM27	3	62.5374	-1.14872	0.360691	-3.18479	0.00144858	0.00476565	0.19029	0.616386	0.0820354	0.111288	UP_BMP
C2orf72	3	348.072	-1.15806	0.364649	-3.17583	0.00149411	0.00489565	0.00131925	0.606022	0.161677	0.230981	UP_BMP
BLZF1	3	811.092	-0.541588	0.170542	-3.17568	0.00149484	0.00489708	0.322786	0.480721	0.0253699	0.171124	UP_BMP
CSRP1	3	416.817	0.775122	0.244514	3.17006	0.00152409	0.00498516	0.0818337	0.393519	0.42209	0.102558	UP_TGF
TYRO3P	3	18.728	-2.17834	0.687175	-3.17	0.0015244	0.00498516	0.291342	0.409875	0.0138655	0.284917	UP_BMP
CFAP43	3	44.9949	-1.33615	0.421788	-3.16783	0.00153582	0.00501419	0.0097386	0.674746	0.29559	0.0199256	UP_BMP
TNK2	3	3285.01	0.56996	0.180064	3.16531	0.00154916	0.00505268	0.0345907	0.655753	0.27727	0.0323866	UP_TGF
CYP1B1-AS1	3	16.4641	2.70041	0.853272	3.16478	0.00155203	0.00506102	0.0760811	0.531131	0.173779	0.219009	UP_TGF
ZNF395	3	4100.91	0.925989	0.292769	3.16286	0.00156226	0.00508928	0.0852236	0.553059	0.307179	0.0545386	UP_TGF
CP	3	39.3696	-1.49308	0.472326	-3.16113	0.0015716	0.00511562	0.240646	0.590431	0.117557	0.0513661	UP_BMP
POLDIP3	3	2529.62	0.453029	0.14339	3.15942	0.00158086	0.00514269	1.46605e-06	0.899261	0.053211	0.0475261	UP_TGF
ALKBH6	3	405.085	-0.566591	0.179371	-3.15878	0.00158433	0.00515296	0.0928254	0.561782	0.062899	0.282493	UP_BMP
NCBP2	3	1335.8	-0.446145	0.141253	-3.15848	0.00158593	0.00515711	0.187907	0.673701	0.0144958	0.123896	UP_BMP
ELMSAN1	3	1905.27	0.51196	0.162402	3.15243	0.00161918	0.00525514	0.298644	0.34565	0.290886	0.0648192	UP_TGF
TOX2	3	60.0994	-5.50777	1.75084	-3.14579	0.00165641	0.00536172	0.171443	0.645756	0.0661315	0.11667	UP_BMP
RHOD	3	794.517	-0.539849	0.171755	-3.14314	0.00167145	0.00540501	0.382158	0.360285	0.0631988	0.194358	UP_BMP
INAFM1	3	206.504	0.630761	0.200755	3.14195	0.00167828	0.00542495	0.016335	0.486792	0.0841798	0.412694	UP_TGF
MAD1L1	3	421.309	0.712892	0.227294	3.13643	0.00171018	0.00551602	0.0370671	0.671726	0.0514092	0.239797	UP_TGF
VKORC1	3	2503.26	0.486886	0.155468	3.13173	0.00173777	0.00559289	0.0128089	0.600351	0.231182	0.155658	UP_TGF
PSD4	3	2494.09	-0.714857	0.228734	-3.12527	0.00177641	0.00570369	0.223349	0.515607	0.0531791	0.207865	UP_BMP
SPARCL1	3	1428.18	-0.837494	0.268326	-3.12119	0.00180124	0.00577545	0.0804398	0.552128	0.29685	0.0705819	UP_BMP
ENTPD3	3	50.9031	-1.23906	0.39739	-3.11798	0.00182094	0.00582945	0.117837	0.632029	0.0354342	0.2147	UP_BMP
CCP110	3	540.55	0.823157	0.264023	3.11775	0.00182237	0.00583286	0.0183249	0.580679	0.316912	0.0840839	UP_TGF
PIK3IP1	3	383.39	-0.878146	0.282039	-3.11356	0.00184843	0.00591022	0.119639	0.355905	0.360451	0.164004	UP_BMP
SPIDR	3	1151.47	0.453918	0.145955	3.10998	0.00187098	0.00596854	0.0401966	0.438351	0.15845	0.363002	UP_TGF
CHPF	3	10846	-0.593659	0.190906	-3.10969	0.00187287	0.00597221	0.0816639	0.401808	0.496408	0.0201203	UP_BMP
CYC1	3	1016.61	-0.535903	0.172485	-3.10696	0.00189023	0.006018	0.254615	0.445249	0.241224	0.058912	UP_BMP
SNHG7	3	771.463	0.503836	0.162422	3.10203	0.00192201	0.00610861	0.0359238	0.898956	0.056832	0.00828864	UP_TGF
STAT6	3	4114.83	0.473421	0.152757	3.09917	0.00194063	0.00616537	0.0877174	0.470407	0.126862	0.315014	UP_TGF
DOHH	3	204.066	-0.799917	0.2586	-3.09326	0.0019797	0.00627726	0.0576776	0.533549	0.257962	0.150811	UP_BMP
NDUFA12	3	561.659	-0.587782	0.19019	-3.0905	0.00199818	0.00632697	0.16268	0.51985	0.223452	0.094018	UP_BMP
LINC00941	3	95.6627	0.827397	0.267783	3.0898	0.00200292	0.00633979	0.181228	0.564558	0.241059	0.0131552	UP_TGF
MLLT11	3	616.961	0.76047	0.246327	3.08724	0.00202027	0.0063885	0.0536684	0.524798	0.151527	0.270006	UP_TGF
PPP1CC	3	2690.69	0.544772	0.176643	3.08402	0.00204222	0.00644916	0.414227	0.349173	0.00437776	0.232222	UP_TGF
HASPIN	3	46.722	1.42383	0.461796	3.08324	0.00204761	0.00646117	0.0102326	0.519365	0.44918	0.0212223	UP_TGF
GALT	3	782.812	0.545676	0.177265	3.0783	0.00208185	0.00655652	0.0144438	0.882168	0.0406133	0.0627751	UP_TGF
TMEM165	3	2592.97	-0.38818	0.126222	-3.07537	0.00210239	0.00661354	0.100125	0.489437	0.192165	0.218273	UP_BMP
ANAPC13	3	1042.21	-0.613228	0.199605	-3.07221	0.0021248	0.00667759	0.00322451	0.359407	0.506432	0.130937	UP_BMP
ANKS1B	3	109.798	0.856981	0.279242	3.06895	0.00214811	0.00674434	0.00426998	0.602853	0.080929	0.311948	UP_TGF
STK11IP	3	670.267	0.502467	0.163845	3.06673	0.00216414	0.00679206	0.216727	0.473665	0.298783	0.0108254	UP_TGF
WNT10B	3	36.3814	-2.08722	0.680716	-3.06621	0.00216792	0.0068026	0.000213179	0.43312	0.547935	0.0187316	UP_BMP
CCDC14	3	1651.35	0.543246	0.177188	3.06593	0.00216991	0.00680622	0.305602	0.35217	0.313228	0.0289995	UP_TGF
NLRP2	3	339.053	-0.878819	0.287102	-3.061	0.00220598	0.00691008	0.0793766	0.825561	0.0443079	0.050754	UP_BMP
DNTTIP1	3	465.956	-0.621609	0.203079	-3.06092	0.00220661	0.00691069	0.0124513	0.57937	0.325202	0.0829772	UP_BMP
PKMYT1	3	82.2305	1.0805	0.353471	3.05683	0.00223691	0.00699352	0.150543	0.679623	0.0925044	0.07733	UP_TGF
TUSC2	3	346.632	-0.694951	0.227651	-3.0527	0.00226794	0.00708507	0.399253	0.341672	0.0354114	0.223664	UP_BMP
NFIC	3	2313.23	0.426358	0.13973	3.0513	0.00227856	0.00711281	0.040092	0.807779	0.0516048	0.100524	UP_TGF
CCDC173	3	29.7981	-3.15627	1.03896	-3.03793	0.00238213	0.0074049	0.0824303	0.493869	0.232941	0.19076	UP_BMP
PTGDS	3	477.565	-1.2481	0.410938	-3.0372	0.00238785	0.00742128	0.000719821	0.557944	0.390952	0.0503843	UP_BMP
CENPP	3	527.36	-0.991599	0.326807	-3.0342	0.00241173	0.00748551	0.155711	0.487757	0.105836	0.250696	UP_BMP
ANKRD17	3	4638.65	-0.361576	0.119313	-3.03047	0.00244174	0.00756426	0.0255891	0.606211	0.16945	0.19875	UP_BMP
FAM111B	3	84.2744	0.934596	0.308429	3.03018	0.00244409	0.00757008	0.0133133	0.485463	0.0438435	0.45738	UP_TGF
ANXA1	3	4190.58	0.629359	0.207849	3.02796	0.00246213	0.00762307	0.33221	0.526793	0.0997749	0.0412224	UP_TGF
PTPRK	3	1111.88	-0.652352	0.215599	-3.02577	0.00248002	0.00767262	0.0800998	0.331024	0.432875	0.156	UP_BMP
PRSS12	3	83.7811	-1.05233	0.348496	-3.01962	0.00253089	0.00780628	0.00275398	0.814765	0.0442571	0.138223	UP_BMP
KIAA0513	3	1606.73	-0.483125	0.16009	-3.01784	0.00254582	0.00784934	0.00266194	0.528793	0.346726	0.121819	UP_BMP
HIF1AN	3	1042.43	-0.506604	0.167946	-3.01647	0.00255733	0.00788038	0.203662	0.574619	0.14437	0.0773484	UP_BMP
FAM114A1	3	5300.25	0.567246	0.1881	3.01566	0.0025642	0.00790005	0.0223676	0.516699	0.408219	0.0527148	UP_TGF
RDH5	3	40.8994	1.37268	0.455459	3.01383	0.00257969	0.00793879	0.0457116	0.574252	0.0764955	0.303541	UP_TGF
DLGAP5	3	180.047	1.19258	0.396769	3.00574	0.00264932	0.00811934	0.421885	0.42697	0.00791418	0.143231	UP_TGF
ADHFE1	3	340.977	1.04747	0.348659	3.0043	0.00266196	0.00814735	0.00225437	0.437166	0.113691	0.446889	UP_TGF
APBA3	3	351.392	0.664259	0.221887	2.99369	0.00275629	0.00840763	0.00277814	0.724192	0.204254	0.0687758	UP_TGF
STEAP3-AS1	3	13.8763	2.2123	0.739443	2.99184	0.00277302	0.00845234	0.0343792	0.338645	0.471606	0.15537	UP_TGF
U2AF1L4	3	275.152	0.528501	0.176661	2.99161	0.00277515	0.00845724	0.277595	0.553828	0.0737987	0.0947783	UP_TGF
PNMA3	3	104.309	-0.847315	0.283837	-2.98522	0.00283374	0.00861809	0.0714197	0.517643	0.349548	0.0613894	UP_BMP
ANP32E	3	1063.03	0.438617	0.14696	2.98461	0.00283943	0.00863378	0.14152	0.486264	0.264959	0.107257	UP_TGF
SAMD10	3	17.7664	2.23125	0.748698	2.98017	0.00288086	0.00874831	0.0861485	0.458145	0.260103	0.195603	UP_TGF
SERPING1	3	942.094	0.51344	0.173043	2.96712	0.003006	0.0090877	0.266306	0.434259	0.111114	0.188321	UP_TGF
IAH1	3	681.163	0.449713	0.151612	2.96621	0.00301491	0.00911294	0.0783711	0.37821	0.482234	0.0611844	UP_TGF
GTPBP3	3	471.099	0.57823	0.195159	2.96287	0.00304787	0.00919891	0.139231	0.455642	0.286626	0.118501	UP_TGF
COX4I1	3	3209.69	-0.405533	0.13695	-2.96116	0.00306478	0.009238	0.197643	0.749157	0.0317825	0.0214176	UP_BMP
MXI1	3	1706.74	-0.812269	0.274341	-2.9608	0.0030684	0.0092472	0.152961	0.485422	0.182096	0.179521	UP_BMP
POU3F1	3	16.2591	-2.00641	0.678689	-2.9563	0.00311353	0.00935724	0.409085	0.38953	0.0433989	0.157986	UP_BMP
IGFBP6	3	76.1104	0.976084	0.330324	2.95493	0.00312742	0.00939032	0.00598396	0.664572	0.141758	0.187686	UP_TGF
MTOR	3	2934.69	-0.399285	0.135536	-2.94598	0.00321936	0.0096362	0.32464	0.390261	0.0192643	0.265835	UP_BMP
DPY19L2P2	3	327.817	0.59281	0.202317	2.93011	0.0033884	0.0100756	0.131044	0.500563	0.148125	0.220268	UP_TGF
LCNL1	3	34.7928	-1.538	0.525281	-2.92796	0.00341193	0.0101418	0.195275	0.538184	0.0272924	0.239249	UP_BMP
ZNF767P	3	444.174	0.779856	0.266461	2.92671	0.00342564	0.010177	0.0266721	0.820249	0.0076962	0.145382	UP_TGF
TRIM56	3	941.018	0.522541	0.178646	2.925	0.00344452	0.0102228	0.000313379	0.664872	0.167319	0.167496	UP_TGF
MCM3	3	983.42	0.657304	0.225192	2.91886	0.00351319	0.0104105	0.360585	0.551874	0.0487412	0.0387993	UP_TGF
FBXO9	3	1360.64	0.498559	0.171238	2.9115	0.00359695	0.0106289	0.123176	0.337857	0.454265	0.0847018	UP_TGF
NEURL4	3	830.781	0.534016	0.184006	2.90217	0.00370583	0.0109083	0.164256	0.720949	0.0148289	0.0999659	UP_TGF
LIMA1	3	983.91	0.6434	0.221756	2.90139	0.0037151	0.0109313	0.0470429	0.787446	0.137713	0.0277988	UP_TGF
PC	3	794.259	-0.588723	0.203108	-2.89858	0.00374859	0.0110179	0.136922	0.291136	0.473474	0.0984678	UP_BMP
AKR1B1	3	695.538	0.58909	0.203407	2.89612	0.00377813	0.0110963	0.235489	0.39108	0.0778803	0.295551	UP_TGF
PCCA	3	316.745	0.544007	0.187923	2.89484	0.00379347	0.0111318	0.0103001	0.628476	0.0687571	0.292466	UP_TGF
WFDC12	3	64.8989	-1.49305	0.515954	-2.89375	0.00380667	0.0111625	0.0747264	0.601751	0.318616	0.00490704	UP_BMP
UBAC1	3	823.22	0.41483	0.143989	2.88098	0.00396444	0.0115751	0.143214	0.331025	0.398742	0.127019	UP_TGF
ATP1B2	3	154.95	1.1244	0.390892	2.87649	0.0040212	0.0117094	0.112449	0.616457	0.267467	0.00362633	UP_TGF
SNX19	3	2903.97	-0.634354	0.221497	-2.86394	0.00418402	0.0121471	0.000585737	0.645174	0.264902	0.0893379	UP_BMP
LMNTD2	3	90.4705	0.831986	0.290602	2.86298	0.00419679	0.0121779	0.0485222	0.585941	0.296746	0.0687909	UP_TGF
IRF3	3	891.966	0.440172	0.153824	2.86152	0.00421611	0.0122245	0.0275366	0.385088	0.48323	0.104145	UP_TGF
FAM76B	3	351.672	0.515148	0.180157	2.85943	0.004244	0.0122879	0.0989683	0.722735	0.0438509	0.134445	UP_TGF
DVL2	3	1439.15	0.430572	0.150834	2.8546	0.00430907	0.0124557	0.000253888	0.490133	0.0938875	0.415726	UP_TGF
ZCCHC2	3	301.57	0.596306	0.208989	2.85329	0.00432698	0.0125015	0.0100255	0.517657	0.000279411	0.472038	UP_TGF
UBAC2	3	1392.68	0.370844	0.130764	2.83597	0.00456863	0.0131345	0.0246358	0.414474	0.400735	0.160155	UP_TGF
C2CD4D	3	23.7224	1.63818	0.577792	2.83524	0.00457907	0.0131622	0.0129659	0.756417	0.175262	0.0553554	UP_TGF
VCP	3	9096.44	-0.462231	0.163054	-2.83484	0.00458493	0.0131767	0.177287	0.476735	0.256392	0.0895859	UP_BMP
PDE4B	3	238.731	0.834923	0.294582	2.83427	0.0045931	0.0131979	0.200823	0.445003	0.0748063	0.279368	UP_TGF
NDRG3	3	813.566	0.457398	0.161419	2.83361	0.00460248	0.0132174	0.0069381	0.551232	0.424772	0.0170581	UP_TGF
PLTP	3	878.583	-0.841164	0.297058	-2.83164	0.00463094	0.0132855	0.367815	0.453127	0.0747466	0.104311	UP_BMP
MPHOSPH8	3	2496.42	0.484867	0.171922	2.82027	0.00479839	0.013696	0.330472	0.43188	0.165048	0.0725997	UP_TGF
TMEM54	3	249.052	0.674473	0.240502	2.80443	0.00504049	0.0142844	0.20504	0.582027	0.196481	0.0164525	UP_TGF
RHOC	3	7068.55	-0.475247	0.169685	-2.80076	0.0050983	0.0144257	0.0771231	0.605022	0.0671824	0.250672	UP_BMP
ZNF565	3	177.612	0.575832	0.206049	2.79464	0.00519573	0.0146759	0.433967	0.409158	0.0513829	0.105492	UP_TGF
CC2D1A	3	767.897	0.521856	0.187027	2.79027	0.00526642	0.0148519	0.00411884	0.716163	0.105573	0.174145	UP_TGF
NXNL2	3	44.7857	1.43056	0.513608	2.7853	0.00534777	0.0150506	0.101679	0.492344	0.133538	0.272439	UP_TGF
RPP25L	3	209.505	-0.684053	0.246215	-2.77828	0.00546481	0.0153376	0.236555	0.395897	0.18735	0.180199	UP_BMP
DLD	3	1230.83	-0.411969	0.148881	-2.7671	0.00565578	0.0157839	0.0308019	0.728298	0.228677	0.012223	UP_BMP
CTPS2	3	1007.09	0.527832	0.191059	2.76266	0.00573317	0.015978	0.341803	0.338822	0.278014	0.0413609	UP_TGF
HS3ST1	3	147.105	1.24602	0.451311	2.7609	0.00576428	0.0160592	0.0902974	0.656091	0.171898	0.0817133	UP_TGF
MEIS1	3	577.799	0.855872	0.310831	2.7535	0.00589617	0.0163651	0.384572	0.469537	0.0516349	0.0942557	UP_TGF
ZNF354B	3	361.701	0.64317	0.233597	2.75333	0.00589924	0.016368	0.284548	0.387621	0.172418	0.155412	UP_TGF
FIGNL1	3	266.615	0.566117	0.206393	2.7429	0.0060899	0.0168254	0.0925042	0.757818	0.138913	0.0107648	UP_TGF
FBXL8	3	202.807	0.731044	0.26672	2.74087	0.00612772	0.0169242	0.00628162	0.641853	0.228583	0.123283	UP_TGF
AMZ2	3	1435.45	-0.374818	0.136999	-2.73592	0.00622055	0.0171544	0.265838	0.39458	0.213371	0.126211	UP_BMP
TCEAL4	3	3046.8	0.319045	0.116743	2.73288	0.0062784	0.0172964	0.00328672	0.95993	0.0145096	0.0222734	UP_TGF
ATG7	3	525.283	-0.480527	0.176016	-2.73002	0.00633311	0.0174324	0.0265903	0.456009	0.461551	0.0558501	UP_BMP
CBY1	3	658.265	-0.394579	0.144662	-2.72759	0.00637986	0.0175462	0.0559501	0.41067	0.521719	0.0116609	UP_BMP
BCAM	3	134.055	-1.04051	0.381754	-2.7256	0.00641845	0.0176404	0.0010836	0.397827	0.522886	0.0782033	UP_BMP
ZMAT4	3	28.4	1.66193	0.611549	2.71758	0.00657613	0.0180343	0.169746	0.507784	0.242571	0.0798988	UP_TGF
GATB	3	294.965	-0.733307	0.269871	-2.71725	0.00658274	0.0180494	0.0248983	0.665791	0.301823	0.0074873	UP_BMP
KLHL25	3	160.252	0.626472	0.230649	2.71613	0.00660499	0.0180921	0.419633	0.372864	0.0761446	0.131359	UP_TGF
ZNF443	3	63.8511	0.924953	0.340552	2.71604	0.00660671	0.0180938	0.0891713	0.458449	0.219893	0.232486	UP_TGF
PEX11G	3	74.1571	-0.912671	0.336466	-2.71252	0.0066774	0.0182628	0.0220503	0.873871	0.0960501	0.00802851	UP_BMP
LINC00685	3	309.359	0.691014	0.254882	2.71111	0.00670582	0.018319	0.42686	0.498847	0.0497447	0.0245485	UP_TGF
TMEM184A	3	28.8246	-1.74412	0.645776	-2.70082	0.00691696	0.018839	0.0872697	0.673976	0.0591047	0.17965	UP_BMP
FAM13A-AS1	3	170.214	0.989849	0.367706	2.69195	0.00710347	0.0192793	0.0771177	0.743028	0.144127	0.0357266	UP_TGF
PVR	3	1963.11	-0.505259	0.187761	-2.69097	0.00712436	0.0193231	0.0110425	0.424609	0.536933	0.0274153	UP_BMP
ARID3C	3	16.8885	-1.99661	0.742881	-2.68766	0.00719545	0.0194868	0.000285194	0.921737	0.0296171	0.0483607	UP_BMP
FAM161A	3	249.154	0.589578	0.21986	2.6816	0.007327	0.0198035	0.0373993	0.625031	0.251074	0.0864953	UP_TGF
USP20	3	869.583	0.52384	0.19536	2.6814	0.00733138	0.0198121	0.00267165	0.578923	0.417039	0.00136567	UP_TGF
CD4	3	111.803	-0.806013	0.300878	-2.67887	0.0073871	0.0199428	0.0079063	0.463326	0.414207	0.114561	UP_BMP
ASB1	3	1006.5	-0.499035	0.18638	-2.67751	0.00741711	0.0200172	0.105017	0.692828	0.176842	0.0253138	UP_BMP
UBQLN4	3	1039.42	0.395609	0.147947	2.67398	0.00749559	0.0202078	0.0182082	0.558805	0.132237	0.290749	UP_TGF
ARSA	3	860.703	-0.562516	0.21081	-2.66835	0.00762248	0.0204934	0.28969	0.62105	0.0553734	0.0338868	UP_BMP
TPGS1	3	306.149	0.505506	0.189571	2.66658	0.00766264	0.0205946	0.395273	0.514546	0.0319764	0.0582047	UP_TGF
CREBBP	3	4349.28	0.399524	0.149839	2.66635	0.00766788	0.0206053	0.330384	0.53742	0.0078468	0.124349	UP_TGF
TNRC6A	3	3874.22	0.601582	0.225881	2.66327	0.00773849	0.0207745	0.151239	0.499988	0.0121403	0.336633	UP_TGF
CEP57	3	1236.13	0.471178	0.176936	2.66299	0.007745	0.0207851	0.0454054	0.710877	0.0669336	0.176784	UP_TGF
TOR1AIP2	3	3581.25	-0.36878	0.138489	-2.66288	0.00774754	0.0207885	0.0758052	0.477492	0.26434	0.182363	UP_BMP
LIN7C	3	504.405	-0.438019	0.164648	-2.66033	0.00780632	0.0209256	0.194594	0.317407	0.448195	0.0398039	UP_BMP
INPP5B	3	1355.29	0.501882	0.188668	2.66014	0.00781089	0.0209344	0.0537992	0.579233	0.140229	0.226739	UP_TGF
CAST	3	2607.35	0.47994	0.180485	2.65917	0.00783331	0.0209876	0.159917	0.617832	0.19746	0.0247907	UP_TGF
SPAG16	3	416.727	-0.499136	0.187904	-2.65634	0.00789949	0.0211509	0.0514535	0.417319	0.475545	0.0556829	UP_BMP
PREB	3	1277.58	-0.470055	0.176982	-2.65595	0.00790852	0.0211717	0.420394	0.337223	0.0365368	0.205846	UP_BMP
NRROS	3	21.3487	2.03417	0.76624	2.65475	0.00793683	0.02123	0.0286749	0.592761	0.127326	0.251238	UP_TGF
RPL35	3	8676.32	-0.416211	0.156812	-2.6542	0.00794971	0.021261	0.0234208	0.551755	0.399473	0.0253509	UP_BMP
ZNF585B	3	333.247	0.540156	0.20369	2.65186	0.00800501	0.0213882	0.235355	0.620901	0.00579229	0.137952	UP_TGF
ZNF131	3	772.282	0.52613	0.198508	2.65043	0.00803901	0.0214681	0.0822199	0.745019	0.124102	0.048659	UP_TGF
ALS2CL	3	822.257	0.718136	0.271061	2.64935	0.00806459	0.0215258	0.0337748	0.789736	0.0543294	0.122159	UP_TGF
HSPA1A	3	1376.36	-0.729685	0.27547	-2.64887	0.00807622	0.0215427	0.00110517	0.496721	0.469184	0.0329896	UP_BMP
TMEM86A	3	117.501	-0.671352	0.253924	-2.64391	0.0081955	0.0218395	0.116883	0.607684	0.188262	0.087171	UP_BMP
JMJD4	3	569.073	-0.560716	0.212692	-2.63629	0.00838186	0.0222778	0.0685051	0.547087	0.158031	0.226377	UP_BMP
BAG5	3	1404.5	-0.441727	0.167778	-2.6328	0.00846836	0.0224894	0.0206158	0.848375	0.0915545	0.0394549	UP_BMP
LEKR1	3	10.2527	-2.39924	0.912777	-2.62851	0.00857601	0.0227419	0.0547865	0.414022	0.453817	0.0773741	UP_BMP
ZNF114	3	68.6737	0.90071	0.343015	2.62586	0.00864291	0.0229007	0.271469	0.393952	0.245393	0.0891865	UP_TGF
SYT12	3	202.436	-1.27719	0.487144	-2.6218	0.00874674	0.0231377	0.136848	0.669199	0.146616	0.0473363	UP_BMP
ZNF709	3	168.244	0.723854	0.276378	2.61907	0.00881697	0.02329	0.00757778	0.724953	0.10392	0.16355	UP_TGF
GPRC5C	3	2008.02	0.414167	0.158186	2.61823	0.00883874	0.0233361	0.153047	0.518038	0.0661849	0.262731	UP_TGF
FYTTD1	3	1701.06	0.438747	0.167626	2.61741	0.00885995	0.0233807	0.450594	0.37467	0.0235676	0.151168	UP_TGF
PATZ1	3	666.577	0.378239	0.144595	2.61585	0.00890056	0.0234554	0.0569665	0.788436	0.101551	0.0530461	UP_TGF
SNTB2	3	2468.09	-0.436306	0.166795	-2.61583	0.00890118	0.0234554	0.264698	0.597376	0.0848375	0.0530882	UP_BMP
FRMD7	3	32.8417	-1.32961	0.509093	-2.61173	0.00900856	0.0237076	0.0565566	0.537429	0.130632	0.275382	UP_BMP
PHRF1	3	1826.93	0.430632	0.165194	2.60682	0.00913871	0.0240036	0.0986723	0.572918	0.23673	0.0916798	UP_TGF
CHPF2	3	5072.52	-0.468061	0.179899	-2.60179	0.00927373	0.0242973	0.0979167	0.563642	0.0494535	0.288988	UP_BMP
ZNRF2	3	177.692	0.646563	0.248635	2.60045	0.00931018	0.0243625	0.272891	0.541867	0.105996	0.0792458	UP_TGF
NDUFS2	3	1334.14	0.402853	0.155031	2.59853	0.00936237	0.0244767	0.0384126	0.4043	0.457683	0.0996039	UP_TGF
SEZ6L2	3	440.846	-0.750559	0.289004	-2.59705	0.00940284	0.0245628	0.392285	0.449587	0.0923087	0.0658189	UP_BMP
LYG1	3	24.9055	1.29692	0.500101	2.59331	0.00950562	0.0247955	0.0348704	0.807082	0.153253	0.00479456	UP_TGF
EEF1D	3	6844.99	0.370369	0.143154	2.58721	0.00967564	0.0251826	0.0251481	0.763274	0.042754	0.168824	UP_TGF
WIPI1	3	2330.35	-0.459827	0.178504	-2.57601	0.00999484	0.0259141	0.368477	0.34812	0.0686102	0.214793	UP_BMP
ENTPD6	3	1624.74	0.422199	0.164055	2.57351	0.0100671	0.0260808	0.0142829	0.74501	0.11728	0.123428	UP_TGF
USP45	3	289.925	-0.600753	0.233546	-2.57231	0.0101023	0.0261678	0.140006	0.426582	0.199398	0.234015	UP_BMP
ATP6V1C2	3	12.432	-2.07659	0.808852	-2.56733	0.0102484	0.0265166	0.0795911	0.6979	0.0861406	0.136369	UP_BMP
CSNK1E	3	2739.73	0.422417	0.164783	2.56347	0.010363	0.0267623	0.0345955	0.859211	0.0229358	0.0832581	UP_TGF
ARID4A	3	757.706	0.360535	0.140814	2.56037	0.010456	0.0269766	0.00161083	0.363138	0.421112	0.214139	UP_TGF
KCNJ15	3	22.3199	1.6702	0.652861	2.55828	0.0105193	0.0271142	0.360149	0.397607	0.192003	0.0502415	UP_TGF
ROPN1B	3	31.8292	-1.47388	0.576667	-2.55586	0.0105925	0.0272814	0.00433588	0.521353	0.119875	0.354436	UP_BMP
TBC1D22A	3	1166.06	0.390838	0.152928	2.55569	0.0105977	0.0272862	0.204135	0.569677	0.0681571	0.158031	UP_TGF
TMEM50B	3	684.68	0.469144	0.18372	2.55358	0.0106621	0.0274174	0.04492	0.435091	0.0894466	0.430543	UP_TGF
PYCR3	3	404.329	-0.836583	0.329024	-2.54262	0.0110026	0.0281861	0.137625	0.60048	0.138991	0.122905	UP_BMP
DHFR	3	1112.21	-0.504353	0.199004	-2.53439	0.0112643	0.0287347	0.0436697	0.505775	0.260827	0.189728	UP_BMP
MRPL44	3	671.746	-0.375685	0.148373	-2.53204	0.0113401	0.0288896	0.142455	0.475097	0.218852	0.163596	UP_BMP
SCD5	3	513.184	-0.670682	0.266436	-2.51724	0.0118279	0.0299381	0.151642	0.355245	0.413965	0.0791475	UP_BMP
USP3	3	1080.67	-0.533495	0.211962	-2.51694	0.0118378	0.0299586	0.382996	0.411766	0.0265641	0.178673	UP_BMP
GPS1	3	1402.37	-0.50979	0.202804	-2.51371	0.0119469	0.0302061	0.0220803	0.562208	0.0896947	0.326017	UP_BMP
ZNF670-ZNF695	3	173.186	0.593138	0.236205	2.51111	0.0120351	0.0303964	0.136232	0.520875	0.328529	0.0143649	UP_TGF
C16orf58	3	3347.98	0.339253	0.135138	2.51043	0.0120585	0.0304507	0.448872	0.366158	0.0492344	0.135736	UP_TGF
ATP6V1F	3	1319.03	-0.406445	0.161961	-2.50951	0.0120897	0.030525	0.0504827	0.618706	0.0865196	0.244292	UP_BMP
ZNF169	3	283.388	0.645343	0.257648	2.50474	0.0122541	0.0308729	0.226491	0.445615	0.0899288	0.237965	UP_TGF
POLD1	3	401.378	0.548912	0.219419	2.50166	0.0123614	0.0311	0.0998903	0.726466	0.0508814	0.122762	UP_TGF
ELF2	3	1004.22	0.384532	0.153939	2.49796	0.0124911	0.0313925	0.0252489	0.544154	0.0649557	0.365641	UP_TGF
C1QTNF8	3	62.7921	1.22915	0.492329	2.4966	0.0125389	0.0315078	0.13111	0.500146	0.266804	0.10194	UP_TGF
CD8A	3	26.3733	-1.29765	0.520486	-2.49315	0.0126616	0.0317731	0.410199	0.429613	0.0711041	0.0890835	UP_BMP
KLHL22	3	944.568	0.397877	0.159657	2.49207	0.0126999	0.0318583	0.136485	0.579656	0.186559	0.0973001	UP_TGF
GPC6	3	3616.46	-0.50554	0.203586	-2.48318	0.0130216	0.03257	0.415576	0.460492	0.00321696	0.120715	UP_BMP
PRELID1	3	1561.09	-0.521718	0.210527	-2.47815	0.0132066	0.032982	0.184789	0.409085	0.28125	0.124876	UP_BMP
PFDN2	3	534.536	-0.396251	0.160239	-2.47287	0.0134032	0.0334116	0.297576	0.403324	0.238891	0.0602092	UP_BMP
PRR7	3	77.0575	-0.879383	0.35581	-2.4715	0.0134548	0.0335198	0.25322	0.452398	0.280874	0.0135078	UP_BMP
PELP1	3	1071.11	0.417402	0.169473	2.46295	0.01378	0.0342148	0.317711	0.425427	0.115331	0.141531	UP_TGF
BRICD5	3	157.189	0.656189	0.26686	2.45893	0.0139352	0.0345529	0.0192487	0.718062	0.0981409	0.164548	UP_TGF
OTOG	3	118.706	1.47096	0.599184	2.45494	0.0140909	0.0348836	0.147576	0.641972	0.0432899	0.167163	UP_TGF
LRMDA	3	92.8329	-1.08426	0.443516	-2.4447	0.0144974	0.0357726	0.0127377	0.630305	0.179199	0.177759	UP_BMP
PIP5KL1	3	62.3946	-1.0821	0.442654	-2.44458	0.0145022	0.0357792	0.2397	0.377002	0.190272	0.193026	UP_BMP
IGSF5	3	15.0295	-2.30993	0.945364	-2.44343	0.0145483	0.0358765	0.0768802	0.710952	0.0197032	0.192464	UP_BMP
F2RL1	3	257.912	0.580829	0.237981	2.44065	0.0146607	0.0361264	0.029426	0.67016	0.155691	0.144723	UP_TGF
TOX4	3	1713.9	-0.410397	0.168232	-2.43947	0.0147089	0.0362124	0.277785	0.475141	0.0751568	0.171917	UP_BMP
TRPV2	3	128.001	-0.721144	0.295669	-2.43903	0.0147269	0.0362512	0.224586	0.41588	0.224992	0.134541	UP_BMP
ATP13A2	3	644.591	0.658231	0.270054	2.4374	0.0147931	0.0363977	0.458651	0.402117	0.00556434	0.133668	UP_TGF
SAMD15	3	55.8291	-0.866623	0.355981	-2.43446	0.014914	0.0366452	0.141856	0.658141	0.191364	0.00864014	UP_BMP
FAM3A	3	921.862	0.36017	0.14796	2.43423	0.0149233	0.0366517	0.016377	0.762563	0.102046	0.119014	UP_TGF
DIRAS1	3	406.271	0.61887	0.254294	2.43368	0.0149461	0.0366966	0.040479	0.50273	0.38927	0.0675219	UP_TGF
TRIL	3	85.1773	4.80992	1.97808	2.43162	0.0150315	0.0368897	0.1991	0.640615	0.157255	0.00303	UP_TGF
PER2	3	517.519	0.844156	0.347447	2.4296	0.0151156	0.0370568	0.379612	0.393161	0.102931	0.124297	UP_TGF
WDR27	3	1146.8	0.676427	0.279125	2.42339	0.0153766	0.0376232	0.266875	0.646279	0.0507011	0.0361455	UP_TGF
PPP5C	3	1396.09	0.309161	0.128261	2.4104	0.0159352	0.0388326	0.000565045	0.895997	0.0139529	0.0894853	UP_TGF
CCDC77	3	209.917	0.528881	0.219703	2.40725	0.016073	0.0391507	0.0737786	0.737038	0.173787	0.0153965	UP_TGF
BACH2	3	212.667	0.614744	0.255522	2.40584	0.0161353	0.0392795	0.156083	0.321723	0.351746	0.170449	UP_TGF
ZNF275	3	1559.54	0.286738	0.119394	2.40161	0.0163233	0.0396893	0.00504821	0.508933	0.114351	0.371668	UP_TGF
ZNF286A	3	625.569	0.484006	0.201604	2.40078	0.0163602	0.0397611	0.205435	0.690024	0.0820307	0.0225095	UP_TGF
ZNF204P	3	325.665	0.67633	0.281842	2.39968	0.0164096	0.0398466	0.0531237	0.432648	0.171086	0.343142	UP_TGF
MBNL1-AS1	3	249.837	-0.939566	0.391641	-2.39905	0.0164378	0.0399021	0.186515	0.464509	0.284836	0.0641403	UP_BMP
PEX13	3	542.675	-0.381984	0.15937	-2.39685	0.0165369	0.0400916	0.014371	0.611202	0.207816	0.166611	UP_BMP
METTL4	3	208.282	0.558075	0.232945	2.39574	0.0165869	0.0401924	0.0636427	0.462388	0.447444	0.0265254	UP_TGF
MAP1LC3C	3	63.2279	0.807202	0.337402	2.3924	0.0167386	0.0405177	0.0331962	0.780939	0.0298203	0.156045	UP_TGF
CARM1	3	2295.83	0.328963	0.137781	2.38758	0.0169597	0.0409976	0.370458	0.460776	0.00580161	0.162965	UP_TGF
TMEM170B	3	142.25	0.652391	0.273837	2.38241	0.0171998	0.0414923	0.019984	0.485178	0.37282	0.122018	UP_TGF
UBN1	3	1847.02	-0.391981	0.164632	-2.38096	0.0172678	0.0416317	0.0975129	0.834119	0.041114	0.0272543	UP_BMP
ZIC4	3	47.8283	1.32955	0.558494	2.38059	0.0172849	0.0416667	0.0238192	0.38042	0.399881	0.19588	UP_TGF
CCDC148	3	35.6463	-1.0698	0.449586	-2.37952	0.0173354	0.04177	0.31896	0.439807	0.0239771	0.217256	UP_BMP
FBXO43	3	78.3551	0.809979	0.341334	2.37298	0.0176453	0.0424476	0.110799	0.82382	0.00540114	0.0599792	UP_TGF
TRA2A	3	1466.14	0.359187	0.151376	2.37281	0.0176531	0.0424502	0.0509248	0.652563	0.163483	0.13303	UP_TGF
CHRNA10	3	26.5269	1.29933	0.548267	2.36988	0.017794	0.0427422	0.354586	0.371179	0.0718335	0.202402	UP_TGF
BET1	3	365.067	0.41026	0.17327	2.36775	0.0178965	0.0429481	0.390318	0.540902	0.0159032	0.0528761	UP_TGF
DHCR24	3	7259.43	-0.514206	0.217328	-2.36604	0.0179794	0.0430823	0.074644	0.335791	0.452509	0.137055	UP_BMP
SDHAF3	3	156.471	-0.717338	0.303184	-2.36602	0.0179805	0.0430823	0.346759	0.521944	0.0024619	0.128836	UP_BMP
WDFY3	3	2164.68	-0.537547	0.227613	-2.36167	0.0181928	0.0435398	0.00171855	0.635729	0.0448903	0.317662	UP_BMP
STBD1	3	245.642	-0.761665	0.322848	-2.35921	0.0183141	0.0438045	0.0451155	0.621192	0.210525	0.123167	UP_BMP
RAB10	3	2044.95	-0.382457	0.162288	-2.35665	0.0184405	0.0440615	0.30897	0.354296	0.0608788	0.275855	UP_BMP
PDE10A	3	154.621	0.651814	0.277073	2.3525	0.0186478	0.0444304	0.232477	0.632188	0.024762	0.110572	UP_TGF
ITGA1	3	771.56	0.560482	0.238272	2.35228	0.0186588	0.0444398	0.448846	0.426269	0.0122081	0.112676	UP_TGF
KIF7	3	857.244	-0.355285	0.151287	-2.34842	0.0188532	0.0448306	0.0644223	0.590532	0.0998085	0.245237	UP_BMP
TPST1	3	1531.06	-0.411279	0.175245	-2.34688	0.0189316	0.0449711	0.0771437	0.423126	0.114299	0.385431	UP_BMP
NDUFB9	3	966.844	-0.398559	0.170357	-2.33955	0.0193069	0.045776	0.132392	0.402411	0.143055	0.322141	UP_BMP
ZNF335	3	903	0.337087	0.144529	2.33232	0.0196839	0.0465512	0.00501056	0.441586	0.122706	0.430698	UP_TGF
AKR7A3	3	32.4404	1.13876	0.48878	2.3298	0.0198166	0.0468296	0.161787	0.364411	0.468027	0.00577436	UP_TGF
FBXO44	3	776.249	0.51757	0.222453	2.32664	0.0199842	0.0471485	0.0274159	0.63764	0.189031	0.145914	UP_TGF
ARMCX1	3	1344.3	0.35625	0.153138	2.32634	0.0200003	0.0471797	0.0509402	0.648878	0.151513	0.148668	UP_TGF
ANKRD44	3	622.669	-0.441519	0.190095	-2.32262	0.0201996	0.047574	0.331532	0.468144	0.0510639	0.149261	UP_BMP
WDR34	3	567.705	0.501216	0.216804	2.31184	0.0207866	0.0488085	0.0172074	0.735695	0.018935	0.228163	UP_TGF
TADA1	3	209.317	0.514924	0.222759	2.31157	0.0208012	0.0488216	0.00775221	0.77513	0.0307165	0.186401	UP_TGF
RGS20	3	25.0523	-1.2405	0.537356	-2.30852	0.0209702	0.0491828	0.321536	0.403857	0.11459	0.160017	UP_BMP
MAGED1	3	12279.6	-0.366124	0.15908	-2.30151	0.0213625	0.0499665	0.0375652	0.697988	0.258434	0.00601363	UP_BMP

## Sheet: supplementary file 4e
gene	clust	baseMean	log2FoldChange	lfcSE	stat	pvalue	padj	ENH_variance	PROM_variance	Unexplained_variance	Combo.Int.variance	DIR
SP7	4	3791.53	-7.75652	0.274428	-28.2643	9.49689e-176	1.10557e-172	0.57676	0.0205896	0.0997175	0.302933	UP_BMP
FGFR3	4	21022.8	-4.00439	0.154749	-25.8768	1.21602e-147	9.90935e-145	0.948912	0.00740233	0.0306572	0.0130287	UP_BMP
ATOH8	4	4033.66	-4.74011	0.189802	-24.9739	1.17352e-137	7.65039e-135	0.488311	0.0595699	0.0117309	0.440388	UP_BMP
EFHD1	4	5726.97	-3.75923	0.150689	-24.947	2.30078e-137	1.44224e-134	0.784071	0.0216615	0.175076	0.0191908	UP_BMP
PPA1	4	6225.63	-3.39574	0.139874	-24.277	3.42686e-130	1.99468e-127	0.479479	0.392239	0.0850351	0.0432468	UP_BMP
HOMER2	4	1830.01	-5.05598	0.212263	-23.8194	2.10239e-125	1.10531e-122	0.788272	0.00838487	0.130548	0.0727953	UP_BMP
LTBP1	4	22042.5	4.37738	0.186213	23.5074	3.42278e-122	1.69044e-119	0.345102	0.232159	0.0284534	0.394285	UP_TGF
MMP2	4	19001.7	3.92522	0.167534	23.4295	2.14118e-121	9.69361e-119	0.361876	0.2063	0.25589	0.175933	UP_TGF
PTH1R	4	29460.8	-4.98268	0.213024	-23.3902	5.37882e-121	2.3693e-118	0.301946	0.0834474	0.346836	0.267771	UP_BMP
PMEPA1	4	11206.9	4.16318	0.181934	22.883	6.86514e-116	2.664e-113	0.821975	0.0529581	0.0668815	0.0581854	UP_TGF
CILP	4	1284.68	6.21212	0.272138	22.8271	2.46934e-115	9.35936e-113	0.746719	0.00208648	0.0282256	0.222969	UP_TGF
ENAH	4	12304.9	-3.03521	0.137557	-22.065	6.85019e-108	2.32592e-105	0.552057	0.10299	0.301501	0.0434512	UP_BMP
LEFTY2	4	2368.72	5.92756	0.268758	22.0554	8.48447e-108	2.82204e-105	0.508188	0.00312209	0.0338235	0.454866	UP_TGF
MFAP3L	4	3793.97	-4.14417	0.190608	-21.7419	8.24895e-105	2.63611e-102	0.486086	0.133313	0.0162358	0.364365	UP_BMP
LPCAT3	4	3492.24	-2.47137	0.1161	-21.2865	1.51421e-100	4.4069e-98	0.660994	0.0166157	0.249693	0.0726975	UP_BMP
CCDC85A	4	1136.25	-4.82197	0.234178	-20.591	3.30339e-94	8.54581e-92	0.400459	0.00101435	0.0202299	0.578297	UP_BMP
SPTLC2	4	3698.44	-2.35587	0.118624	-19.86	9.02975e-88	1.98874e-85	0.391136	0.00472331	0.103519	0.500621	UP_BMP
SAT1	4	15812.5	-3.49877	0.178617	-19.5881	1.95364e-85	4.13513e-83	0.269295	0.15418	0.0928356	0.483689	UP_BMP
GPRIN3	4	380.12	-6.1198	0.323246	-18.9323	6.17717e-80	1.15719e-77	0.521168	0.385792	0.0150354	0.0780051	UP_BMP
CFB	4	659.736	5.4952	0.292286	18.8008	7.44209e-79	1.36282e-76	0.298412	0.0636518	0.319947	0.317989	UP_TGF
CXCL14	4	1543.54	-3.94306	0.210143	-18.7637	1.49573e-78	2.7086e-76	0.53139	0.0230931	8.7952e-05	0.445429	UP_BMP
SORD	4	2525.32	-3.25109	0.173896	-18.6956	5.37159e-78	9.41357e-76	0.929059	0.0328717	0.0188456	0.0192237	UP_BMP
ITGA11	4	8693.78	2.40583	0.12889	18.6657	9.41004e-78	1.63154e-75	0.777411	0.196152	0.00793156	0.0185055	UP_TGF
RGS5	4	506.762	-4.81437	0.259572	-18.5474	8.56418e-77	1.43896e-74	0.581173	0.00247621	0.10335	0.313001	UP_BMP
PDPN	4	16863.2	-3.43692	0.186795	-18.3994	1.3278e-75	2.12162e-73	0.55866	0.15697	0.0140927	0.270277	UP_BMP
LRRFIP2	4	4152.65	-2.43573	0.135068	-18.0333	1.06648e-72	1.62445e-70	0.406087	0.074808	0.0239492	0.495156	UP_BMP
ACOX1	4	4580.46	-2.26887	0.125987	-18.0088	1.66118e-72	2.48384e-70	0.758488	0.00382579	0.153741	0.0839457	UP_BMP
GXYLT2	4	2947.92	2.14229	0.120986	17.7069	3.70709e-70	5.39448e-68	0.593125	0.0103918	0.0409809	0.355502	UP_TGF
ASPN	4	12506.9	4.34609	0.247582	17.5541	5.53107e-69	7.97747e-67	0.528566	0.0283083	0.0944563	0.34867	UP_TGF
LMOD1	4	400.775	-4.09634	0.234534	-17.4659	2.60738e-68	3.66337e-66	0.518951	0.0765009	0.396847	0.00770124	UP_BMP
OSBPL1A	4	2223.78	-3.0029	0.173225	-17.3352	2.54963e-67	3.46282e-65	0.696005	0.0359119	0.0221236	0.24596	UP_BMP
IL17RB	4	607.567	-3.43939	0.198538	-17.3236	3.12152e-67	4.20451e-65	0.777777	0.0280276	0.0183385	0.175857	UP_BMP
ATP8B4	4	675.81	-6.37533	0.371251	-17.1726	4.26227e-66	5.51321e-64	0.804878	0.0122413	0.161824	0.0210562	UP_BMP
SMIM5	4	993.476	-3.66208	0.214495	-17.073	2.35846e-65	2.9797e-63	0.279453	0.167724	0.0763365	0.476487	UP_BMP
SOCS2	4	519.046	-3.4111	0.200035	-17.0525	3.34681e-65	4.19588e-63	0.845917	0.00348752	0.0396727	0.110923	UP_BMP
IRX5	4	782.367	-4.09125	0.241222	-16.9605	1.6101e-64	1.95832e-62	0.946214	0.00298332	0.0107959	0.0400067	UP_BMP
MYO1D	4	10576.4	2.91373	0.173342	16.8091	2.093e-63	2.45408e-61	0.519721	0.0352459	0.135876	0.309157	UP_TGF
CXCL13	4	22138.9	-10.2676	0.614625	-16.7055	1.19592e-62	1.39223e-60	0.27921	0.129577	0.275857	0.315356	UP_BMP
SLC35D1	4	7920.64	-2.73217	0.164007	-16.6589	2.60785e-62	3.01438e-60	0.355846	0.0461272	0.274907	0.323119	UP_BMP
STXBP2	4	368.69	-4.96664	0.300827	-16.51	3.11098e-61	3.54565e-59	0.343185	0.051575	0.0601576	0.545082	UP_BMP
NFATC2	4	2390.32	4.15372	0.252347	16.4603	7.071e-61	8.003e-59	0.292557	0.290525	0.312167	0.10475	UP_TGF
RCAN2	4	644.3	-5.39885	0.32822	-16.4489	8.54684e-61	9.60665e-59	0.831603	0.00186863	0.148395	0.0181335	UP_BMP
BCAT1	4	16839.8	-2.48205	0.152044	-16.3245	6.60383e-60	7.37186e-58	0.457512	0.0558892	0.35878	0.127818	UP_BMP
MAOA	4	1445.77	-5.21442	0.320133	-16.2883	1.19497e-59	1.32487e-57	0.737849	0.0266015	0.207363	0.0281864	UP_BMP
SPSB1	4	2846.16	2.45508	0.151006	16.2581	1.95717e-59	2.15527e-57	0.495861	0.0705295	0.0402844	0.393325	UP_TGF
FZD8	4	2745.4	2.24174	0.140167	15.9934	1.42018e-57	1.43765e-55	0.719978	0.022873	0.0679616	0.189187	UP_TGF
LMCD1	4	898.197	2.80321	0.175596	15.964	2.27815e-57	2.27787e-55	0.317443	0.102809	0.0748308	0.504917	UP_TGF
NOG	4	2089.55	-4.23992	0.270002	-15.7033	1.43575e-55	1.36842e-53	0.567634	0.01493	0.0354605	0.381976	UP_BMP
PARP14	4	1466.8	-2.59144	0.166683	-15.5471	1.66437e-54	1.55896e-52	0.926434	0.0119967	0.00349583	0.0580733	UP_BMP
GRB14	4	285.961	-5.84786	0.380487	-15.3694	2.62557e-53	2.33834e-51	0.432695	0.200108	0.00995702	0.35724	UP_BMP
ENPEP	4	477.793	-3.0305	0.197756	-15.3244	5.25142e-53	4.64085e-51	0.304602	0.275349	0.316247	0.103801	UP_BMP
SPRY4	4	735.802	3.11546	0.203383	15.3182	5.78235e-53	5.06671e-51	0.377998	0.049814	0.00537579	0.566812	UP_TGF
GRIN3A	4	200.486	-4.92051	0.323262	-15.2214	2.54978e-52	2.14208e-50	0.605778	0.0025377	0.155598	0.236087	UP_BMP
TPM2	4	16521	-2.41877	0.161245	-15.0006	7.27438e-51	5.8984e-49	0.609218	0.0845957	0.130395	0.175791	UP_BMP
HLCS	4	1308.64	-2.09989	0.140547	-14.9408	1.78731e-50	1.42792e-48	0.289262	0.181152	0.162494	0.367092	UP_BMP
SNX22	4	1702.22	-3.73518	0.251989	-14.8228	1.04337e-49	8.09753e-48	0.263519	0.044807	0.253774	0.437901	UP_BMP
RAPGEF2	4	3894.88	-1.77218	0.119711	-14.8039	1.38288e-49	1.06312e-47	0.339357	0.0957815	0.02601	0.538852	UP_BMP
KLHL13	4	2271.86	-3.5635	0.242058	-14.7217	4.67662e-49	3.57838e-47	0.219645	0.0451598	0.285971	0.449224	UP_BMP
OLFM2	4	351.807	4.04334	0.276149	14.6419	1.51804e-48	1.12973e-46	0.332624	0.0579222	0.213188	0.396266	UP_TGF
ENPP5	4	471.762	-3.48359	0.239739	-14.5308	7.73295e-48	5.65164e-46	0.326816	0.00304287	0.0928332	0.577307	UP_BMP
MTMR11	4	1857.36	4.01097	0.276863	14.4872	1.46018e-47	1.05769e-45	0.608777	0.0074983	0.0264262	0.357298	UP_TGF
TMX1	4	2561.66	-1.74334	0.121382	-14.3624	8.91426e-47	6.28938e-45	0.993158	0.000536786	0.00272074	0.00358411	UP_BMP
WSB2	4	4225.41	-2.21914	0.154838	-14.332	1.38113e-46	9.66083e-45	0.397477	0.00744751	0.1734	0.421676	UP_BMP
CREB3L1	4	1547.32	2.52191	0.177179	14.2337	5.66217e-46	3.86117e-44	0.407715	0.081483	0.284757	0.226045	UP_TGF
MELTF	4	19949.5	-4.12119	0.289968	-14.2126	7.65788e-46	5.17876e-44	0.754607	0.120871	0.106896	0.0176264	UP_BMP
BAMBI	4	1827.48	-2.54826	0.179371	-14.2066	8.33584e-46	5.61395e-44	0.445677	0.058664	0.335054	0.160605	UP_BMP
TNFRSF25	4	719.61	3.69429	0.260399	14.187	1.10254e-45	7.3947e-44	0.798132	0.0196869	0.0979226	0.0842587	UP_TGF
CPNE8	4	1147.33	-2.23644	0.15768	-14.1834	1.16098e-45	7.75477e-44	0.757711	0.102385	0.0231828	0.116721	UP_BMP
KITLG	4	455.031	-6.0444	0.426203	-14.182	1.18434e-45	7.87853e-44	0.721762	0.053496	0.00478236	0.21996	UP_BMP
PODNL1	4	973.902	3.674	0.259392	14.1639	1.53319e-45	1.01577e-43	0.330747	0.10717	0.237503	0.32458	UP_TGF
SCIN	4	9095.22	-2.59692	0.18339	-14.1606	1.60561e-45	1.05945e-43	0.641972	0.0843792	0.0988722	0.174777	UP_BMP
CYTH3	4	1608.08	1.98754	0.141089	14.0872	4.55538e-45	2.94617e-43	0.555718	0.0297594	0.0597088	0.354814	UP_TGF
ARHGAP44	4	1058.26	-3.07985	0.218662	-14.085	4.69824e-45	3.02655e-43	0.351987	0.319254	0.235396	0.0933625	UP_BMP
BMP5	4	1064.69	4.30808	0.306182	14.0703	5.78032e-45	3.70897e-43	0.440782	0.0840331	0.0873877	0.387797	UP_TGF
COL5A2	4	68977.3	2.83325	0.204196	13.8751	8.96132e-44	5.51138e-42	0.878534	0.00739435	0.00586362	0.108208	UP_TGF
TYRO3	4	1833.72	-1.92205	0.139099	-13.8179	1.98908e-43	1.21872e-41	0.938475	0.0408848	0.0126195	0.00802071	UP_BMP
RHOBTB3	4	8889.14	-2.38568	0.172662	-13.817	2.01255e-43	1.2239e-41	0.628746	0.035437	0.0213335	0.314484	UP_BMP
IRF2BPL	4	1175.84	2.08905	0.152207	13.7251	7.18213e-43	4.31935e-41	0.820761	0.00909158	0.149764	0.0203839	UP_TGF
MINDY2	4	1363.48	-2.51991	0.186342	-13.523	1.14434e-41	6.7088e-40	0.798679	0.00877125	0.137498	0.0550516	UP_BMP
IGF1R	4	5681.98	-1.55251	0.115441	-13.4485	3.14288e-41	1.81641e-39	0.92647	0.00590287	0.0166467	0.0509801	UP_BMP
HMGB3	4	1311.32	-2.40902	0.179844	-13.3951	6.4625e-41	3.65715e-39	0.423664	0.0284406	0.0130794	0.534816	UP_BMP
PLEKHG5	4	1613.27	2.95689	0.222165	13.3094	2.04044e-40	1.14279e-38	0.371525	0.0906366	0.238542	0.299297	UP_TGF
CCND3	4	2294.2	1.95154	0.147564	13.225	6.29418e-40	3.46563e-38	0.877694	0.0117272	0.06998	0.0405987	UP_TGF
ID3	4	4441.61	-2.74228	0.207903	-13.1902	9.99164e-40	5.41009e-38	0.39266	0.283022	0.0542722	0.270046	UP_BMP
MGP	4	25678.6	2.0941	0.159229	13.1514	1.66946e-39	8.95028e-38	0.820126	0.0430646	0.0560668	0.0807426	UP_TGF
COBLL1	4	2073.84	-3.06034	0.233336	-13.1156	2.68031e-39	1.41371e-37	0.434672	0.0261993	0.011753	0.527376	UP_BMP
CNTNAP2	4	293.364	-3.67249	0.281094	-13.065	5.22004e-39	2.73557e-37	0.307294	0.127988	0.095804	0.468914	UP_BMP
COL6A2	4	63647	2.33955	0.180431	12.9665	1.89582e-38	9.71639e-37	0.518591	0.0150309	0.0888425	0.377535	UP_TGF
PSRC1	4	616.519	2.97701	0.229889	12.9498	2.35639e-38	1.20014e-36	0.755858	0.0579597	0.173844	0.012339	UP_TGF
P4HA3	4	499.183	3.93884	0.304623	12.9302	3.03914e-38	1.54305e-36	0.760272	0.0035246	0.0252005	0.211003	UP_TGF
WWTR1	4	3727.27	1.5997	0.123864	12.915	3.70396e-38	1.87476e-36	0.863111	0.000237696	0.13489	0.00176091	UP_TGF
FOXP1	4	3555.69	2.07518	0.161397	12.8576	7.79656e-38	3.87404e-36	0.387938	0.00250108	0.352476	0.257085	UP_TGF
IRX3	4	578.231	-3.37404	0.262757	-12.8409	9.66961e-38	4.79013e-36	0.644634	0.0223104	0.0263102	0.306746	UP_BMP
FLVCR2	4	904.741	-4.12836	0.32157	-12.8381	1.00256e-37	4.95143e-36	0.532877	0.149797	0.313052	0.00427476	UP_BMP
FAT2	4	177.544	6.68976	0.521348	12.8317	1.08993e-37	5.36667e-36	0.621756	0.0345097	0.144771	0.198963	UP_TGF
ANKH	4	4816.1	1.97934	0.155578	12.7224	4.43771e-37	2.13982e-35	0.245901	0.249455	0.367657	0.136987	UP_TGF
PXYLP1	4	1267.82	1.76532	0.139042	12.6963	6.19832e-37	2.97995e-35	0.272805	0.164207	0.0837381	0.47925	UP_TGF
NABP1	4	370.021	-2.55029	0.201341	-12.6665	9.06176e-37	4.34378e-35	0.446798	0.00105181	0.128311	0.423839	UP_BMP
STUM	4	628.076	-4.00034	0.316047	-12.6574	1.0181e-36	4.86598e-35	0.949304	0.0376995	0.00803661	0.00496001	UP_BMP
MFAP4	4	15083.4	2.98224	0.235746	12.6502	1.11564e-36	5.3166e-35	0.418528	0.115758	0.0141347	0.45158	UP_TGF
ARHGEF26	4	675.649	-1.94066	0.153518	-12.6413	1.24995e-36	5.93926e-35	0.732049	0.0810327	0.0189268	0.167991	UP_BMP
FGFR1	4	18348.4	2.92663	0.232022	12.6136	1.77744e-36	8.39673e-35	0.666532	0.0439221	0.161098	0.128449	UP_TGF
RAP2A	4	2381.37	-1.89794	0.151547	-12.5238	5.53452e-36	2.56985e-34	0.932103	0.00132548	0.00772329	0.0588484	UP_BMP
COL5A1	4	72916.8	2.22922	0.179137	12.4442	1.50432e-35	6.86761e-34	0.440055	0.348567	0.200843	0.0105348	UP_TGF
GALNT5	4	4928.25	-2.31803	0.186569	-12.4245	1.92372e-35	8.75777e-34	0.94756	0.000115462	0.0116125	0.0407121	UP_BMP
PON2	4	3647.95	-2.65162	0.213514	-12.4189	2.06265e-35	9.3381e-34	0.359975	0.000683126	0.425388	0.213955	UP_BMP
SH3BP4	4	4584.75	-2.26075	0.183396	-12.3272	6.46917e-35	2.86507e-33	0.397766	0.24452	0.0128531	0.34486	UP_BMP
SLC37A1	4	608.73	-2.28536	0.186083	-12.2814	1.14051e-34	5.0238e-33	0.511874	0.1225	0.170229	0.195397	UP_BMP
JPH1	4	1247.54	-1.91582	0.15664	-12.2307	2.13204e-34	9.31582e-33	0.972015	0.0148611	0.00321497	0.00990868	UP_BMP
IPO11	4	975.263	-2.06771	0.169465	-12.2014	3.05493e-34	1.32418e-32	0.762709	0.00685723	0.0217146	0.208719	UP_BMP
KALRN	4	667.787	2.24462	0.184665	12.1551	5.38845e-34	2.31717e-32	0.336265	0.262653	0.00280849	0.398274	UP_TGF
WSCD2	4	3061.78	-2.08478	0.172037	-12.1182	8.45805e-34	3.61809e-32	0.557439	0.33462	0.0356176	0.0723237	UP_BMP
DERA	4	1364.57	-2.11476	0.174822	-12.0966	1.10053e-33	4.68313e-32	0.459787	0.242448	0.232244	0.0655213	UP_BMP
CRLF1	4	494.815	4.01592	0.333654	12.0362	2.29403e-33	9.71121e-32	0.384205	0.199635	0.012094	0.404066	UP_TGF
B4GALNT3	4	4319.77	2.69188	0.22428	12.0023	3.4568e-33	1.44459e-31	0.369581	0.355995	0.153918	0.120505	UP_TGF
COL22A1	4	1649.42	7.23459	0.602983	11.998	3.63972e-33	1.51327e-31	0.265647	0.116723	0.115828	0.501803	UP_TGF
LITAF	4	2959.54	1.58374	0.13258	11.9455	6.85494e-33	2.84279e-31	0.686261	0.00787424	0.0224195	0.283445	UP_TGF
PHF19	4	1791.1	2.38394	0.199854	11.9284	8.41593e-33	3.47248e-31	0.245517	0.0611978	0.312495	0.38079	UP_TGF
MT1X	4	2124.18	3.74107	0.313865	11.9193	9.38509e-33	3.84317e-31	0.865773	0.0123406	0.114372	0.00751456	UP_TGF
ITGB5	4	4453.92	1.87945	0.157764	11.913	1.01271e-32	4.11599e-31	0.519214	0.00352995	0.0671727	0.410083	UP_TGF
MAP4K3	4	1823.52	-2.04408	0.172459	-11.8525	2.088e-32	8.4233e-31	0.712904	0.0161388	0.162698	0.108259	UP_BMP
MTURN	4	2750.31	-1.8807	0.1587	-11.8506	2.13554e-32	8.59382e-31	0.563836	0.0434445	0.337861	0.0548579	UP_BMP
FAXC	4	828.759	-2.84462	0.240822	-11.8121	3.37981e-32	1.3501e-30	0.392813	0.027716	0.0122174	0.567254	UP_BMP
LOXL1	4	2063.34	2.52309	0.213622	11.811	3.42505e-32	1.36483e-30	0.329476	0.0218414	0.203594	0.445088	UP_TGF
S100A4	4	1080.23	2.80181	0.23749	11.7976	4.01691e-32	1.59677e-30	0.380411	0.246955	0.0955037	0.27713	UP_TGF
PPP1R13L	4	1388.15	2.71468	0.230163	11.7946	4.16187e-32	1.65037e-30	0.641621	0.10003	0.242293	0.0160565	UP_TGF
IGF1	4	572.122	2.64008	0.224556	11.7569	6.50654e-32	2.54301e-30	0.31352	0.0896595	0.0375818	0.559238	UP_TGF
YWHAQ	4	16273.8	-1.68814	0.143587	-11.757	6.50354e-32	2.54301e-30	0.413409	0.300651	0.213393	0.0725482	UP_BMP
TRAM2	4	4488.95	1.53094	0.132674	11.5391	8.37671e-31	3.12411e-29	0.386138	0.205152	0.143174	0.265537	UP_TGF
SDC4	4	7135.64	-2.41432	0.209953	-11.4993	1.32934e-30	4.92401e-29	0.576958	0.245699	0.037561	0.139782	UP_BMP
CEMIP	4	254.132	5.12323	0.446927	11.4632	2.01855e-30	7.42628e-29	0.652063	0.0700222	0.0870536	0.190862	UP_TGF
CHDH	4	980.267	-1.96917	0.173279	-11.3642	6.30429e-30	2.28836e-28	0.701673	0.0408916	0.0691422	0.188293	UP_BMP
HBEGF	4	299.239	4.19007	0.369426	11.3421	8.11524e-30	2.91326e-28	0.5119	0.0431204	0.00763959	0.43734	UP_TGF
AXL	4	3512.43	2.58461	0.229071	11.283	1.59179e-29	5.66442e-28	0.76554	0.0762053	0.116987	0.0412673	UP_TGF
RCAN3	4	506.334	-2.24683	0.199392	-11.2684	1.87994e-29	6.66072e-28	0.512542	0.286865	0.172981	0.0276113	UP_BMP
IL4R	4	739.868	2.48978	0.222048	11.2128	3.52789e-29	1.23651e-27	0.380868	0.128479	0.240248	0.250404	UP_TGF
FAXDC2	4	2149.59	-1.92691	0.172392	-11.1775	5.25565e-29	1.82248e-27	0.686021	0.101666	0.0477476	0.164566	UP_BMP
EHBP1L1	4	1878.81	2.31259	0.206912	11.1767	5.30474e-29	1.8356e-27	0.269177	0.0390873	0.164898	0.526837	UP_TGF
CSDC2	4	492.416	2.32743	0.20909	11.1312	8.83924e-29	3.03928e-27	0.349929	0.181377	0.0200396	0.448654	UP_TGF
KCNS3	4	662.248	-2.27875	0.204825	-11.1254	9.44336e-29	3.24016e-27	0.594858	0.231202	0.0931833	0.0807568	UP_BMP
FAM13A	4	2945.92	-1.75179	0.157695	-11.1087	1.13792e-28	3.87987e-27	0.901902	0.00753784	0.02185	0.0687098	UP_BMP
SLC44A1	4	5953.34	-1.23314	0.111192	-11.0902	1.3992e-28	4.75085e-27	0.944246	0.0134977	0.0280879	0.0141687	UP_BMP
TAOK1	4	1117.73	-2.19696	0.198495	-11.0681	1.79181e-28	6.0587e-27	0.455543	0.0714435	0.175552	0.297462	UP_BMP
SLC25A24	4	1390.5	-1.97279	0.178505	-11.0517	2.15134e-28	7.25933e-27	0.881528	0.0143818	0.0605973	0.0434928	UP_BMP
HELZ	4	3883.73	-1.95255	0.177502	-11.0002	3.8134e-28	1.27172e-26	0.568478	0.00101032	0.0225092	0.408003	UP_BMP
DHRS3	4	1548.07	-1.83621	0.167363	-10.9714	5.24571e-28	1.74479e-26	0.719593	0.230226	0.0489947	0.00118593	UP_BMP
RNF185	4	2272.18	-1.41456	0.128952	-10.9697	5.34502e-28	1.7742e-26	0.83199	0.0105863	0.10855	0.0488738	UP_BMP
UPK1B	4	142.832	-4.0598	0.370834	-10.9478	6.811e-28	2.24302e-26	0.89685	0.0111812	0.0692928	0.0226758	UP_BMP
MALL	4	1709.39	-2.61993	0.239852	-10.9231	8.9393e-28	2.93144e-26	0.48354	0.357487	0.12272	0.0362524	UP_BMP
LONRF1	4	1708.39	-2.35304	0.215455	-10.9213	9.12269e-28	2.98558e-26	0.667313	0.022838	0.135574	0.174275	UP_BMP
LRRN4CL	4	254.114	2.66996	0.244551	10.9178	9.47669e-28	3.08902e-26	0.573815	0.399028	0.000738236	0.0264186	UP_TGF
SNTA1	4	1421.05	-1.90101	0.1742	-10.9128	1.00098e-27	3.25629e-26	0.788247	0.0364664	0.141657	0.0336293	UP_BMP
FASN	4	46936.8	-1.81021	0.166011	-10.9042	1.10079e-27	3.57383e-26	0.439114	0.0584778	0.00286408	0.499544	UP_BMP
FAM169A	4	147.078	-3.94834	0.367188	-10.7529	5.74102e-27	1.82748e-25	0.86805	0.12463	0.00725062	6.99038e-05	UP_BMP
RASA3	4	1327.25	1.86964	0.174027	10.7434	6.36871e-27	2.02334e-25	0.403728	0.00766883	0.0858976	0.502706	UP_TGF
CNTNAP1	4	860.402	2.74614	0.255774	10.7366	6.85275e-27	2.17288e-25	0.494685	0.0261555	0.231123	0.248037	UP_TGF
WDR77	4	1162.87	-1.94365	0.181303	-10.7205	8.1598e-27	2.57729e-25	0.834681	0.0191453	0.00901327	0.13716	UP_BMP
KLF10	4	853.175	2.05479	0.192104	10.6962	1.06002e-26	3.32235e-25	0.554361	0.0505809	0.143846	0.251211	UP_TGF
CEBPB	4	2344.94	-1.79369	0.169102	-10.6072	2.7604e-26	8.53682e-25	0.728202	0.0495559	0.10893	0.113312	UP_BMP
SLC14A1	4	175.935	3.09258	0.292942	10.557	4.7154e-26	1.4473e-24	0.587432	0.00324104	0.36853	0.0407965	UP_TGF
B4GALT4	4	2451.99	-1.46114	0.138497	-10.55	5.07898e-26	1.55596e-24	0.57064	0.0598614	0.0348379	0.334661	UP_BMP
RDX	4	6068.96	-1.43841	0.136392	-10.5462	5.29091e-26	1.61785e-24	0.277443	0.0263353	0.172875	0.523347	UP_BMP
RAPGEF4	4	377.898	3.42148	0.326261	10.4869	9.9187e-26	2.98256e-24	0.692019	0.00343732	0.0359126	0.268631	UP_TGF
PIM3	4	2764.74	-1.76585	0.168655	-10.4702	1.18414e-25	3.54762e-24	0.249474	0.101929	0.162916	0.485681	UP_BMP
TNFAIP8L3	4	1474.96	-2.63123	0.25135	-10.4684	1.20713e-25	3.60986e-24	0.508484	0.00766396	0.00392368	0.479928	UP_BMP
GPR162	4	181.645	3.32525	0.318154	10.4517	1.43961e-25	4.27654e-24	0.245204	0.335009	0.311914	0.107873	UP_TGF
ARHGEF37	4	957.428	-2.80441	0.268847	-10.4312	1.78536e-25	5.28092e-24	0.942855	0.0250107	0.00677247	0.0253622	UP_BMP
ACTG2	4	244.492	-2.8823	0.276366	-10.4293	1.82224e-25	5.38024e-24	0.979427	0.00551915	0.00630681	0.00874675	UP_BMP
SUGCT	4	509.988	2.87976	0.27627	10.4237	1.93244e-25	5.69528e-24	0.946525	0.0073603	0.000473433	0.0456413	UP_TGF
ITPR2	4	1533.47	-1.58049	0.151655	-10.4216	1.97549e-25	5.81166e-24	0.857645	0.00817406	0.0599887	0.074192	UP_BMP
ADCY4	4	465.256	3.65337	0.350884	10.4119	2.18787e-25	6.40177e-24	0.332602	0.0027682	0.0740466	0.590583	UP_TGF
PLCB4	4	733.14	2.642	0.254012	10.4011	2.451e-25	7.15885e-24	0.325391	0.136649	0.10273	0.43523	UP_TGF
C1QL1	4	1755.73	2.79611	0.269607	10.3711	3.35761e-25	9.73706e-24	0.511125	0.0809355	0.311478	0.0964609	UP_TGF
TGFBI	4	7778.02	3.2409	0.313386	10.3416	4.56969e-25	1.31817e-23	0.670937	0.0508187	0.268179	0.010066	UP_TGF
CAMK1D	4	972.795	1.9814	0.191698	10.3361	4.83955e-25	1.39109e-23	0.471742	0.255955	0.0916266	0.180677	UP_TGF
C3orf70	4	1403.42	-1.81173	0.175593	-10.3178	5.85492e-25	1.67999e-23	0.615993	0.153249	0.00249764	0.22826	UP_BMP
TGFBR3	4	480.089	2.28333	0.221797	10.2947	7.44604e-25	2.12532e-23	0.48283	0.187828	0.216089	0.113253	UP_TGF
ASPHD2	4	173.277	2.83575	0.275682	10.2863	8.12126e-25	2.30593e-23	0.592537	0.342481	0.0348059	0.0301755	UP_TGF
ABHD4	4	2167.74	-1.21106	0.117946	-10.268	9.82516e-25	2.76087e-23	0.420632	0.0153018	0.168854	0.395213	UP_BMP
CADM4	4	201.605	3.32041	0.323399	10.2672	9.90218e-25	2.77772e-23	0.622045	0.103542	0.139758	0.134655	UP_TGF
CPM	4	2235.91	-2.80734	0.273917	-10.2489	1.19727e-24	3.32989e-23	0.451545	0.291	0.222883	0.0345726	UP_BMP
GNB3	4	259.664	2.91643	0.28613	10.1927	2.13809e-24	5.9062e-23	0.267853	0.202211	0.372415	0.157521	UP_TGF
PDCD6	4	4244.48	-1.38725	0.136637	-10.1529	3.21813e-24	8.84471e-23	0.621937	0.136193	0.0880862	0.153784	UP_BMP
KIAA0355	4	1693.94	1.46659	0.144563	10.145	3.48926e-24	9.57374e-23	0.736012	0.0448726	0.0469679	0.172147	UP_TGF
FAM135A	4	1365.02	-1.89775	0.187379	-10.1279	4.15514e-24	1.13625e-22	0.968942	0.00781524	0.00177355	0.0214694	UP_BMP
PIGG	4	3736.84	-1.34218	0.132672	-10.1165	4.66817e-24	1.27227e-22	0.624745	0.150222	0.0151541	0.209879	UP_BMP
HDAC7	4	1297.25	1.72331	0.170504	10.1072	5.13339e-24	1.39208e-22	0.336111	0.0828577	0.113302	0.467729	UP_TGF
GFPT2	4	6542.11	-1.82399	0.180579	-10.1008	5.47984e-24	1.47865e-22	0.242288	0.226593	0.130793	0.400327	UP_BMP
FZD5	4	357.056	-2.50296	0.247824	-10.0997	5.53878e-24	1.49208e-22	0.52977	0.0322286	0.00462567	0.433376	UP_BMP
MT1E	4	960.747	3.06247	0.303252	10.0987	5.59557e-24	1.50489e-22	0.501088	0.15494	0.0297111	0.31426	UP_TGF
ARSB	4	1437.25	1.31012	0.12994	10.0825	6.6012e-24	1.76951e-22	0.827606	0.081916	0.0212193	0.069259	UP_TGF
EML3	4	2570.87	1.4988	0.148775	10.0743	7.17985e-24	1.92146e-22	0.315513	0.265157	0.318801	0.100529	UP_TGF
MYO5B	4	1635.32	-2.53214	0.252376	-10.0332	1.08928e-23	2.88669e-22	0.777573	0.00142324	0.208362	0.0126417	UP_BMP
IL21R	4	416.321	2.71719	0.271124	10.0219	1.22084e-23	3.23007e-22	0.645998	0.0333461	0.217074	0.103581	UP_TGF
SMYD2	4	842.655	-2.09122	0.209725	-9.97123	2.03688e-23	5.30304e-22	0.449962	0.0306664	0.165522	0.353849	UP_BMP
FMOD	4	120243	1.73412	0.173982	9.96729	2.11939e-23	5.50028e-22	0.533464	0.313983	0.0008224	0.15173	UP_TGF
RNF144A	4	2760.15	-1.74369	0.175449	-9.93847	2.83144e-23	7.3017e-22	0.827564	0.0511346	0.0818812	0.0394207	UP_BMP
NRXN3	4	379.177	-3.85899	0.388439	-9.93462	2.94283e-23	7.57698e-22	0.554406	0.0073767	0.0176763	0.420541	UP_BMP
DNAJC15	4	1917.43	-2.56394	0.258331	-9.92503	3.24015e-23	8.31621e-22	0.486267	0.012175	0.0349701	0.466588	UP_BMP
FOXP4	4	3553.17	1.94499	0.195976	9.92462	3.25335e-23	8.33695e-22	0.82017	0.078816	0.0950169	0.00599684	UP_TGF
SRPX2	4	5676.72	3.04751	0.307525	9.90979	3.77434e-23	9.65685e-22	0.821026	0.0933517	0.032256	0.053366	UP_TGF
UGP2	4	8954.97	-1.5516	0.156596	-9.9083	3.83112e-23	9.78677e-22	0.420328	0.0409607	0.364534	0.174177	UP_BMP
KSR1	4	461.843	2.25599	0.227936	9.89747	4.26925e-23	1.08549e-21	0.327104	0.0742564	0.353251	0.245389	UP_TGF
ALKBH8	4	518.457	-1.84156	0.18723	-9.83583	7.8911e-23	1.9665e-21	0.722542	0.201995	0.0479388	0.0275241	UP_BMP
FAM89A	4	540.75	-2.8884	0.294025	-9.82364	8.90676e-23	2.21622e-21	0.572021	0.181581	0.157467	0.088931	UP_BMP
ARHGAP42	4	280.538	-2.55369	0.26065	-9.79739	1.1553e-22	2.86592e-21	0.543538	0.0682365	0.0566615	0.331564	UP_BMP
ZMIZ2	4	1532.43	1.74108	0.178457	9.75628	1.73397e-22	4.25749e-21	0.580211	0.0524641	0.10169	0.265635	UP_TGF
FAM89B	4	833.618	1.86293	0.191731	9.71635	2.56816e-22	6.22855e-21	0.383783	0.188675	0.117714	0.309828	UP_TGF
OSBPL9	4	3952.38	-1.40629	0.145288	-9.67933	3.69128e-22	8.88633e-21	0.5938	0.190014	0.0121785	0.204007	UP_BMP
PRUNE2	4	4872.97	-1.83179	0.189313	-9.67601	3.81307e-22	9.16598e-21	0.861141	0.0145029	0.119004	0.00535224	UP_BMP
AQP3	4	266.84	2.65847	0.275433	9.65197	4.82184e-22	1.15568e-20	0.519743	0.0165222	0.0757618	0.387973	UP_TGF
MICALL1	4	2483.15	-1.64003	0.170268	-9.63207	5.85371e-22	1.39683e-20	0.657357	0.104306	0.0340078	0.20433	UP_BMP
FTH1	4	34422.2	-1.59218	0.165612	-9.61388	6.98683e-22	1.66479e-20	0.898221	0.0227553	0.0475776	0.0314457	UP_BMP
BCL2	4	726.356	-1.99203	0.207221	-9.61308	7.04098e-22	1.67524e-20	0.528919	0.260539	0.0554882	0.155054	UP_BMP
INHBE	4	217.994	3.24937	0.338122	9.61003	7.25261e-22	1.72308e-20	0.642583	0.0877122	0.235262	0.0344425	UP_TGF
HAPLN1	4	118795	-1.60205	0.167187	-9.58236	9.48486e-22	2.24687e-20	0.919036	0.0671077	0.00701091	0.00684591	UP_BMP
SPINT1	4	457.742	-3.67338	0.383531	-9.5778	9.91365e-22	2.34503e-20	0.165826	0.110133	0.225125	0.498915	UP_BMP
RNF157	4	330.385	2.55995	0.268043	9.55054	1.29019e-21	3.02553e-20	0.776335	0.0221534	0.0265512	0.17496	UP_TGF
RNF144B	4	927.149	-1.92999	0.202205	-9.54473	1.36459e-21	3.19543e-20	0.291352	0.275957	0.0392328	0.393459	UP_BMP
GNPTAB	4	1510.38	-1.73074	0.181723	-9.52403	1.66598e-21	3.88999e-20	0.775945	0.0321844	0.0360928	0.155778	UP_BMP
SLC5A3	4	9146.15	-2.27737	0.239498	-9.50893	1.92639e-21	4.47879e-20	0.707612	0.00591755	0.142512	0.143958	UP_BMP
INHBA	4	2084.77	2.75247	0.290322	9.48077	2.5242e-21	5.83538e-20	0.657641	0.103467	0.00797367	0.230919	UP_TGF
CERCAM	4	6406.4	1.35515	0.1433	9.45671	3.17775e-21	7.3151e-20	0.536711	0.0124992	0.0731179	0.377672	UP_TGF
WDFY2	4	827.456	-1.68786	0.178678	-9.44639	3.50713e-21	8.01671e-20	0.961112	0.0216732	0.0110451	0.00616996	UP_BMP
SERPINA1	4	9360.29	-2.44699	0.260457	-9.39502	5.72078e-21	1.29496e-19	0.642658	0.0325723	0.185059	0.13971	UP_BMP
SLC20A1	4	2920.71	1.36343	0.145208	9.38947	6.0305e-21	1.36129e-19	0.669161	0.00500466	0.133458	0.192376	UP_TGF
TLR2	4	467.637	2.37836	0.253362	9.38721	6.16135e-21	1.3889e-19	0.551674	0.24082	0.0267039	0.180802	UP_TGF
COL6A1	4	45789.8	1.68479	0.179583	9.38167	6.49344e-21	1.46174e-19	0.67094	0.125198	0.0332262	0.170636	UP_TGF
ATP6V1H	4	1371.61	-1.65	0.175889	-9.38095	6.53817e-21	1.46978e-19	0.690905	0.00733673	0.195904	0.105855	UP_BMP
ZNF703	4	2972.4	-1.96345	0.209488	-9.3726	7.07688e-21	1.5865e-19	0.839433	0.000112353	0.0675007	0.0929541	UP_BMP
PRTG	4	316.97	-2.45736	0.262963	-9.34492	9.19616e-21	2.04753e-19	0.712484	0.099198	0.0433278	0.14499	UP_BMP
TBCD	4	2754.34	2.05891	0.22119	9.30834	1.29841e-20	2.8558e-19	0.593978	0.0686516	0.0885394	0.248831	UP_TGF
NXPH4	4	435.691	3.94839	0.424281	9.30607	1.32648e-20	2.91361e-19	0.526	0.0947578	0.0823912	0.296851	UP_TGF
PDGFC	4	2882.95	1.86938	0.201103	9.29563	1.46331e-20	3.20551e-19	0.335549	0.245319	0.0234063	0.395725	UP_TGF
HLX	4	151.359	-3.55845	0.383381	-9.28176	1.66702e-20	3.64685e-19	0.940261	0.0224568	0.00783142	0.0294505	UP_BMP
LRRC1	4	1569.51	-1.67093	0.180311	-9.26692	1.91592e-20	4.18574e-19	0.478	0.00376731	0.144135	0.374098	UP_BMP
CHI3L2	4	634.568	3.30967	0.357215	9.26518	1.94741e-20	4.24885e-19	0.362305	0.215126	0.152709	0.26986	UP_TGF
DIO2	4	7020.84	-3.18871	0.344756	-9.24918	2.26226e-20	4.9226e-19	0.448308	0.0230198	0.0432917	0.48538	UP_BMP
C1QTNF2	4	242.376	2.68479	0.291031	9.22511	2.83278e-20	6.12317e-19	0.419985	0.138462	0.356597	0.084956	UP_TGF
THBS3	4	3561.57	2.12242	0.230253	9.21779	3.03291e-20	6.52978e-19	0.549683	0.352237	0.051818	0.0462627	UP_TGF
MDH1	4	2877.97	-1.22991	0.134112	-9.17076	4.69677e-20	1.00589e-18	0.309671	0.0593622	0.40285	0.228117	UP_BMP
ADAMTS10	4	1918.26	2.06707	0.225909	9.15001	5.69262e-20	1.21597e-18	0.469813	0.0728939	0.137055	0.320238	UP_TGF
MAP7	4	91.535	-4.82516	0.528224	-9.13469	6.55943e-20	1.39563e-18	0.752845	0.00305959	0.100704	0.143392	UP_BMP
P3H3	4	2890.31	1.62264	0.177732	9.12965	6.87204e-20	1.45834e-18	0.349363	0.02224	0.238206	0.390191	UP_TGF
FAM117A	4	455.868	-1.58403	0.174058	-9.1006	8.98338e-20	1.89162e-18	0.880676	0.0439028	0.0408534	0.0345681	UP_BMP
RAB23	4	828.145	1.86825	0.206091	9.06518	1.24393e-19	2.59585e-18	0.368473	0.129312	0.0337564	0.468458	UP_TGF
SH3BGRL2	4	535.91	-2.75941	0.305253	-9.03975	1.57024e-19	3.26842e-18	0.96424	0.00887891	0.0223778	0.00450376	UP_BMP
ABHD6	4	628.569	-2.20702	0.2443	-9.03407	1.65402e-19	3.43842e-18	0.6203	0.150951	0.111831	0.116917	UP_BMP
PCSK1N	4	87.8675	4.02863	0.44596	9.03361	1.66098e-19	3.44848e-18	0.688867	0.10045	0.202845	0.00783808	UP_TGF
ANKRD13B	4	380.94	1.48115	0.164008	9.03097	1.70163e-19	3.5284e-18	0.871656	0.0516389	0.0489785	0.0277268	UP_TGF
CCDC190	4	87.0079	-4.5727	0.507541	-9.00952	2.06955e-19	4.26956e-18	0.402837	0.177539	0.0385098	0.381114	UP_BMP
WNT5A	4	898.062	-2.43538	0.270372	-9.0075	2.10798e-19	4.34334e-18	0.585069	0.352994	0.0404937	0.021444	UP_BMP
SLC25A36	4	3970.8	-1.74064	0.193612	-8.99034	2.46474e-19	5.05924e-18	0.869565	0.0480005	0.0274617	0.0549727	UP_BMP
SCN2B	4	364.251	2.35195	0.261889	8.9807	2.69057e-19	5.51584e-18	0.687173	0.0375084	0.0872163	0.188103	UP_TGF
MT1M	4	114.985	4.33362	0.482669	8.97846	2.74582e-19	5.60793e-18	0.827822	0.0080597	0.128697	0.0354209	UP_TGF
LGALS1	4	4378.62	1.79586	0.200467	8.95837	3.29521e-19	6.71317e-18	0.600715	0.119269	0.0741654	0.20585	UP_TGF
COL2A1	4	2.23421e+06	-1.67076	0.186715	-8.94818	3.61394e-19	7.3533e-18	0.596977	0.00243758	0.217944	0.182642	UP_BMP
MRAS	4	2283.49	-1.81569	0.204112	-8.89553	5.81388e-19	1.16837e-17	0.697679	0.0200249	0.0604786	0.221818	UP_BMP
CRISPLD2	4	2813.8	2.50343	0.281444	8.89496	5.84397e-19	1.17297e-17	0.747319	0.00588663	0.0595576	0.187237	UP_TGF
RNF168	4	860.097	1.50452	0.169182	8.89288	5.95461e-19	1.1937e-17	0.567157	0.142582	0.0464217	0.243839	UP_TGF
HPCAL1	4	755.686	-1.77183	0.200531	-8.83568	9.94928e-19	1.96788e-17	0.516726	0.0738041	0.149164	0.260306	UP_BMP
CRNDE	4	396.949	-1.61525	0.183482	-8.80332	1.32832e-18	2.61461e-17	0.883763	0.0109607	0.0465336	0.0587422	UP_BMP
PRKX	4	2624.78	-3.14252	0.356979	-8.8031	1.33084e-18	2.61642e-17	0.639897	0.0269563	0.0470571	0.286089	UP_BMP
SLC45A3	4	207.93	2.22954	0.253395	8.79866	1.38455e-18	2.71219e-17	0.597073	0.0676202	0.0174398	0.317867	UP_TGF
ANK1	4	131.192	-4.3784	0.498029	-8.79146	1.47626e-18	2.88837e-17	0.606616	0.131664	0.0629304	0.198789	UP_BMP
ERVMER34-1	4	598.504	-2.40075	0.273143	-8.78934	1.5044e-18	2.9399e-17	0.270799	0.251229	0.41042	0.0675513	UP_BMP
PLCL1	4	401.272	-3.07931	0.351526	-8.75982	1.95565e-18	3.80349e-17	0.856586	0.041544	0.0158822	0.0859872	UP_BMP
ADK	4	2014.52	-1.59318	0.183335	-8.69002	3.62365e-18	6.96442e-17	0.562466	0.0904807	0.138782	0.208272	UP_BMP
PRKAB2	4	2239.07	-1.57746	0.181685	-8.68237	3.87594e-18	7.42305e-17	0.381618	0.0180036	0.0697913	0.530587	UP_BMP
DSG3	4	896.118	3.14543	0.362295	8.68194	3.89071e-18	7.44257e-17	0.919964	0.00305752	0.0330331	0.0439457	UP_TGF
CDH2	4	1711.2	-2.40768	0.277968	-8.66173	4.64657e-18	8.84695e-17	0.332599	0.172923	0.0513022	0.443175	UP_BMP
RAB34	4	1897.23	1.29311	0.149602	8.64366	5.44391e-18	1.03409e-16	0.490166	0.193863	0.17822	0.137751	UP_TGF
CHRD	4	477.119	2.68217	0.310671	8.63346	5.95227e-18	1.12802e-16	0.735253	0.0157368	0.182922	0.0660876	UP_TGF
SCN9A	4	249.372	-4.35516	0.505199	-8.62067	6.65627e-18	1.25706e-16	0.580783	0.00587619	0.22416	0.189181	UP_BMP
AHCYL1	4	4496.71	-1.18425	0.137599	-8.60649	7.53344e-18	1.41615e-16	0.684792	0.234445	0.00404923	0.0767139	UP_BMP
PTK2B	4	1037.92	-1.56413	0.181906	-8.59857	8.07181e-18	1.51038e-16	0.862654	0.0858152	0.00588372	0.0456466	UP_BMP
ANO8	4	443.49	1.92296	0.223672	8.59722	8.16736e-18	1.52476e-16	0.359281	0.306631	0.215228	0.11886	UP_TGF
NOX4	4	284.836	3.35735	0.390741	8.59226	8.52782e-18	1.58842e-16	0.702304	0.12141	0.0616517	0.114634	UP_TGF
FIRRE	4	281.091	-2.02802	0.236094	-8.5899	8.70434e-18	1.61944e-16	0.675649	0.0198813	0.0234843	0.280985	UP_BMP
GALNT1	4	5810.53	-1.13924	0.13267	-8.58702	8.92525e-18	1.65865e-16	0.647512	0.212044	0.0506469	0.0897966	UP_BMP
GSTM3	4	2616.53	-1.97471	0.230304	-8.57435	9.96453e-18	1.84968e-16	0.578579	0.0970575	0.0452877	0.279076	UP_BMP
FAM104A	4	843.533	-1.17692	0.137451	-8.56245	1.10492e-17	2.0348e-16	0.699277	0.00709064	0.235288	0.0583449	UP_BMP
CD81	4	9190.06	1.46236	0.171118	8.54592	1.27522e-17	2.34048e-16	0.704053	0.0891886	0.179589	0.0271693	UP_TGF
CDKN1C	4	7285.67	-1.5328	0.179993	-8.51588	1.65335e-17	3.02768e-16	0.269897	0.0161733	0.284409	0.429521	UP_BMP
DGKH	4	125.158	-2.83198	0.33261	-8.51443	1.67409e-17	3.06222e-16	0.595622	0.226208	0.0137399	0.16443	UP_BMP
AKIRIN1	4	2296.24	-1.35104	0.158699	-8.51323	1.69151e-17	3.09061e-16	0.481859	0.00690688	0.0450446	0.46619	UP_BMP
CHST15	4	588.538	-1.68667	0.198478	-8.49802	1.92854e-17	3.50405e-16	0.688343	0.0358354	0.0773518	0.19847	UP_BMP
QRICH2	4	336.843	-1.90564	0.224468	-8.48957	2.0741e-17	3.76434e-16	0.468755	0.0122515	0.148793	0.370201	UP_BMP
SLC4A2	4	3363.43	1.7732	0.208916	8.48763	2.10901e-17	3.82342e-16	0.252684	0.0463943	0.314048	0.386874	UP_TGF
NMT2	4	1377.34	-1.52447	0.179981	-8.47019	2.44983e-17	4.40698e-16	0.812746	0.0209335	0.0756177	0.090703	UP_BMP
CHPT1	4	1757.5	-1.35842	0.160529	-8.4621	2.62602e-17	4.70835e-16	0.440725	0.259711	0.22753	0.0720348	UP_BMP
PLEKHB2	4	3232.15	-1.91134	0.22626	-8.44756	2.97447e-17	5.30973e-16	0.956792	0.00293512	0.00875073	0.0315221	UP_BMP
ERG	4	3547.41	2.78955	0.33032	8.44501	3.0402e-17	5.41521e-16	0.725267	0.0671631	0.0314703	0.176099	UP_TGF
USP6NL	4	1135.63	-1.28767	0.152539	-8.44157	3.13115e-17	5.55898e-16	0.805523	0.00640289	0.090854	0.0972199	UP_BMP
SHC4	4	646.949	1.57486	0.186931	8.42481	3.61349e-17	6.39443e-16	0.499532	0.023532	0.0542105	0.422725	UP_TGF
COL11A1	4	325071	-1.15036	0.136585	-8.4223	3.6917e-17	6.52574e-16	0.901084	0.0299984	0.0597477	0.00917005	UP_BMP
MYOCD	4	102.435	-4.43816	0.527061	-8.42058	3.74621e-17	6.61492e-16	0.731999	0.0763514	0.163621	0.0280288	UP_BMP
MAPK13	4	145.814	2.40328	0.285835	8.40794	4.17266e-17	7.34405e-16	0.365461	0.0881945	0.154884	0.391461	UP_TGF
ATP6V1A	4	2341.87	-1.11787	0.133208	-8.39191	4.78308e-17	8.37322e-16	0.435054	0.183475	0.177708	0.203763	UP_BMP
HIPK2	4	4877.68	-1.2748	0.151959	-8.38908	4.89945e-17	8.56301e-16	0.368598	0.118421	0.263287	0.249694	UP_BMP
TCIRG1	4	1268.12	1.91953	0.228829	8.38848	4.92465e-17	8.59335e-16	0.782517	0.112996	0.0073074	0.0971796	UP_TGF
ID4	4	1699.35	-2.58762	0.308491	-8.38799	4.94532e-17	8.6202e-16	0.523135	0.00594779	0.0738864	0.39703	UP_BMP
ITGA5	4	11321.1	1.96249	0.234355	8.37401	5.56883e-17	9.69667e-16	0.352764	0.0360719	0.0798954	0.531269	UP_TGF
DLL1	4	119.469	-3.02861	0.362386	-8.3574	6.41151e-17	1.11047e-15	0.303436	0.280203	0.236446	0.179914	UP_BMP
CYP27C1	4	948.303	1.71793	0.20573	8.3504	6.80336e-17	1.17335e-15	0.771727	0.0142751	0.0378756	0.176122	UP_TGF
SNX1	4	4086.22	-1.29783	0.155759	-8.33231	7.92798e-17	1.36298e-15	0.895206	0.0356665	0.0160182	0.0531097	UP_BMP
PLCG2	4	761.046	2.35858	0.283428	8.32161	8.67733e-17	1.49023e-15	0.438645	0.0624445	0.238254	0.260656	UP_TGF
RRAS2	4	695.705	-1.56042	0.188339	-8.28514	1.17969e-16	2.00277e-15	0.428105	0.122411	0.339914	0.10957	UP_BMP
PRICKLE1	4	1582.87	1.39046	0.168225	8.26546	1.39153e-16	2.35506e-15	0.589221	0.00955389	0.0498821	0.351343	UP_TGF
LMLN	4	1184.37	-1.05856	0.128622	-8.23002	1.87188e-16	3.14191e-15	0.573275	0.039774	0.006079	0.380872	UP_BMP
MARVELD1	4	6383.09	1.46635	0.178213	8.22803	1.90321e-16	3.19121e-15	0.50388	0.372276	0.0197295	0.104115	UP_TGF
CD163L1	4	119.533	-3.99976	0.486479	-8.22185	2.00385e-16	3.33934e-15	0.578341	0.154372	0.0477572	0.21953	UP_BMP
SIK1	4	472.883	2.63952	0.321088	8.22054	2.02583e-16	3.37252e-15	0.388329	0.0317196	0.407053	0.172899	UP_TGF
NPIPA7	4	945.497	1.84535	0.224535	8.21854	2.05994e-16	3.42581e-15	0.493705	0.171806	0.306454	0.0280352	UP_TGF
WNT5B	4	694.174	1.77334	0.216129	8.205	2.30586e-16	3.81532e-15	0.27349	0.145804	0.176267	0.404439	UP_TGF
CALHM2	4	296.855	1.79398	0.218885	8.19598	2.48569e-16	4.10038e-15	0.903554	0.00946948	0.00739723	0.0795797	UP_TGF
DEAF1	4	1279.82	1.58132	0.193006	8.19312	2.54533e-16	4.19451e-15	0.475791	0.122914	0.0913428	0.309952	UP_TGF
C16orf72	4	2051.29	-0.979233	0.119653	-8.18393	2.74737e-16	4.51377e-15	0.394337	0.0568576	0.0278164	0.520988	UP_BMP
DGKD	4	1423.85	1.69194	0.207308	8.16149	3.30927e-16	5.4151e-15	0.649183	0.0215213	0.261362	0.0679339	UP_TGF
LOXL2	4	8761.9	2.36796	0.2903	8.15695	3.43585e-16	5.6166e-15	0.648892	0.121716	0.0209428	0.208449	UP_TGF
ECM1	4	347.237	2.16691	0.265789	8.15273	3.55794e-16	5.81035e-15	0.365515	0.134732	0.0903722	0.40938	UP_TGF
CDK6	4	3520.13	-1.26293	0.155434	-8.12518	4.46697e-16	7.25849e-15	0.30575	0.0618462	0.149242	0.483162	UP_BMP
AMH	4	184.742	1.92475	0.237191	8.11478	4.86649e-16	7.8998e-15	0.869866	0.0161525	0.0395711	0.0744103	UP_TGF
LDLRAD4	4	5763.96	1.25246	0.154731	8.09442	5.75361e-16	9.28439e-15	0.582662	0.0961174	0.113046	0.208175	UP_TGF
SUN2	4	3710.12	1.15289	0.142477	8.09176	5.88082e-16	9.48015e-15	0.739156	0.153746	0.0502772	0.056821	UP_TGF
CITED2	4	752.596	-1.72656	0.213708	-8.07904	6.52796e-16	1.0482e-14	0.242823	0.0449242	0.281989	0.430264	UP_BMP
SEMA4C	4	1195.97	1.2141	0.150307	8.07743	6.6145e-16	1.06105e-14	0.340764	0.0669267	0.0113531	0.580956	UP_TGF
ZNF185	4	854.45	1.73893	0.215561	8.067	7.20452e-16	1.1523e-14	0.514872	0.0302506	0.284881	0.169997	UP_TGF
HAPLN3	4	1495.58	2.2438	0.278694	8.05111	8.20456e-16	1.30968e-14	0.483569	0.00933161	0.0355427	0.471557	UP_TGF
RPH3AL	4	796.943	-1.99564	0.24789	-8.0505	8.24564e-16	1.31495e-14	0.916247	0.0032459	0.0148137	0.0656936	UP_BMP
DDI2	4	1989.66	-1.16558	0.1448	-8.04961	8.30584e-16	1.32325e-14	0.607181	0.150938	0.0540017	0.187879	UP_BMP
TNS1	4	8118.63	2.22053	0.275909	8.04808	8.41037e-16	1.33729e-14	0.986745	0.00162619	0.0100055	0.00162332	UP_TGF
ARRDC3	4	1380.75	-1.74402	0.216966	-8.03824	9.11361e-16	1.44207e-14	0.492222	0.298634	0.132271	0.0768738	UP_BMP
SCUBE3	4	6431.55	1.22954	0.153174	8.02711	9.97946e-16	1.57755e-14	0.515361	0.0973752	0.352102	0.0351618	UP_TGF
EEF2K	4	3553.37	-1.30698	0.162953	-8.02057	1.05253e-15	1.66071e-14	0.872503	0.0275858	0.022949	0.0769625	UP_BMP
NOTUM	4	326.187	-2.04885	0.256163	-7.99823	1.26222e-15	1.98377e-14	0.393677	0.168702	0.0449534	0.392667	UP_BMP
CNNM1	4	317.699	-2.91568	0.364825	-7.99199	1.32779e-15	2.07881e-14	0.68334	0.244257	0.000799462	0.0716033	UP_BMP
TSPAN33	4	86.3267	-3.5804	0.448314	-7.98637	1.38975e-15	2.17371e-14	0.393383	0.169138	0.00352526	0.433954	UP_BMP
STRBP	4	669.879	1.70585	0.2136	7.98619	1.3917e-15	2.17468e-14	0.611328	0.0112756	0.00457538	0.372821	UP_TGF
FBXO22	4	777.071	-1.55077	0.194633	-7.96767	1.61696e-15	2.51462e-14	0.274974	0.20936	0.236379	0.279286	UP_BMP
SBK1	4	373.06	-3.13234	0.393165	-7.967	1.62568e-15	2.52578e-14	0.598901	0.155001	0.0534555	0.192642	UP_BMP
BCL2L13	4	1878.81	-1.18758	0.149268	-7.95599	1.77703e-15	2.75043e-14	0.953947	0.0167028	0.0137005	0.0156492	UP_BMP
CALCOCO1	4	3024.57	1.02457	0.128938	7.94624	1.92259e-15	2.96728e-14	0.79182	0.146557	0.0324123	0.0292105	UP_TGF
TRIM3	4	470.552	1.45994	0.184215	7.92518	2.2782e-15	3.50947e-14	0.684544	0.108042	0.0127886	0.194626	UP_TGF
CERS1	4	346.962	1.65556	0.209304	7.90984	2.57727e-15	3.95895e-14	0.915317	0.000174768	0.0731201	0.0113877	UP_TGF
STK39	4	7873.92	-1.60685	0.203392	-7.90029	2.78247e-15	4.26209e-14	0.316475	0.136331	0.132682	0.414512	UP_BMP
CLEC11A	4	1930.25	1.37028	0.1735	7.8979	2.8363e-15	4.33641e-14	0.728244	0.0392114	0.18192	0.0506244	UP_TGF
NARS2	4	690.741	-1.55981	0.197635	-7.89238	2.96466e-15	4.51993e-14	0.607394	0.0126685	0.104889	0.275049	UP_BMP
SMAD9	4	1906.43	-1.48119	0.187876	-7.88386	3.17421e-15	4.82586e-14	0.366879	0.0141179	0.1551	0.463903	UP_BMP
STX2	4	1347.11	-1.01549	0.129108	-7.86546	3.6774e-15	5.56492e-14	0.731585	0.0226116	0.0421352	0.203668	UP_BMP
COL13A1	4	581.907	2.70115	0.343943	7.85347	4.0468e-15	6.10692e-14	0.463659	0.0628274	0.0778972	0.395617	UP_TGF
LDB2	4	269.908	2.96841	0.378079	7.85128	4.11822e-15	6.20895e-14	0.719185	0.0308368	0.178426	0.071552	UP_TGF
PKP3	4	58.8856	-3.59292	0.458147	-7.8423	4.42385e-15	6.64515e-14	0.881403	0.00826239	0.016246	0.0940888	UP_BMP
SNED1	4	1486.85	2.04163	0.260621	7.8337	4.7372e-15	7.09621e-14	0.657013	0.0465239	0.0136301	0.282833	UP_TGF
FGFR4	4	586.311	-2.49811	0.319546	-7.81769	5.37997e-15	8.02956e-14	0.339733	0.0455624	0.115026	0.499679	UP_BMP
SERPINA5	4	899.937	2.67968	0.343519	7.80068	6.15757e-15	9.13989e-14	0.332137	0.0686895	0.0043491	0.594825	UP_TGF
KIAA1211L	4	215.375	2.78479	0.357689	7.7855	6.94397e-15	1.02698e-13	0.527424	0.0724466	0.0214597	0.37867	UP_TGF
ALPK3	4	1833.76	2.03279	0.262135	7.75473	8.85298e-15	1.30104e-13	0.3365	0.0896678	0.333912	0.23992	UP_TGF
CORO2B	4	187.299	1.66659	0.21496	7.75303	8.97229e-15	1.31502e-13	0.466212	0.0227919	0.0305347	0.480462	UP_TGF
HS3ST3B1	4	3862.83	-1.8622	0.240497	-7.74314	9.69875e-15	1.41894e-13	0.742785	0.0477912	0.0957024	0.113722	UP_BMP
CSNK1A1	4	4591.07	-1.09204	0.141064	-7.74141	9.83195e-15	1.43714e-13	0.788521	0.00586975	0.0541689	0.151441	UP_BMP
PRELP	4	54100.7	-0.989717	0.127944	-7.73556	1.02948e-14	1.50345e-13	0.448526	0.301959	0.073393	0.176122	UP_BMP
NEB	4	675.397	-1.29689	0.167791	-7.72918	1.08243e-14	1.57513e-13	0.672226	0.0462686	0.281027	0.000477841	UP_BMP
TMEM216	4	673.948	1.21807	0.157612	7.72828	1.09006e-14	1.58482e-13	0.494255	0.237992	0.0760804	0.191672	UP_TGF
B3GALT1	4	53.7597	-4.28104	0.554261	-7.72386	1.12855e-14	1.6364e-13	0.921297	0.00125772	0.0210891	0.0563563	UP_BMP
MSC	4	98.4547	4.16221	0.539304	7.71774	1.18413e-14	1.71242e-13	0.570501	0.0243503	0.0261325	0.379016	UP_TGF
PLXNA4	4	601.628	3.13195	0.405884	7.71636	1.19702e-14	1.72953e-13	0.457797	0.00497388	0.0346524	0.502577	UP_TGF
SCYL2	4	1557.78	-1.11896	0.145166	-7.70814	1.27665e-14	1.84131e-13	0.77109	0.0555023	0.0297998	0.143608	UP_BMP
IFI27L2	4	554.968	-1.38172	0.17931	-7.70578	1.30046e-14	1.87399e-13	0.775377	0.0208325	0.196793	0.00699794	UP_BMP
EPHA4	4	1781.4	-1.04883	0.136367	-7.69123	1.45722e-14	2.09433e-13	0.50699	0.0815278	0.00206048	0.409422	UP_BMP
SIX2	4	2926.98	1.90136	0.248018	7.66624	1.77113e-14	2.52987e-13	0.495319	0.0152688	0.145671	0.343741	UP_TGF
BTG1	4	4624.74	-1.74998	0.228318	-7.6647	1.79254e-14	2.55598e-13	0.680763	0.0857038	0.00148077	0.232052	UP_BMP
MACF1	4	12054.3	1.09262	0.14264	7.65996	1.85987e-14	2.64735e-13	0.7075	0.0102671	0.210478	0.071755	UP_TGF
SERPINE2	4	3516.06	2.0477	0.267682	7.64976	2.01361e-14	2.86118e-13	0.385527	0.119411	0.133417	0.361645	UP_TGF
FSTL3	4	1223.14	1.61241	0.21079	7.64934	2.02013e-14	2.86795e-13	0.540158	0.123729	0.0751156	0.260997	UP_TGF
STK38	4	2300.23	-1.45472	0.190194	-7.6486	2.03182e-14	2.88203e-13	0.599944	0.0565037	0.00603986	0.337512	UP_BMP
KPNA1	4	2376.9	-1.27509	0.167059	-7.63257	2.30124e-14	3.25287e-13	0.582356	0.0804406	0.0018763	0.335327	UP_BMP
SECISBP2L	4	5061.53	-1.10343	0.144623	-7.62972	2.35264e-14	3.31977e-13	0.534377	0.0316595	0.00823028	0.425734	UP_BMP
DYNC1I1	4	795.705	-1.06164	0.139322	-7.62004	2.53606e-14	3.56931e-13	0.279411	0.216251	0.0827711	0.421567	UP_BMP
FRRS1	4	123.195	-2.09688	0.275414	-7.61354	2.66683e-14	3.74367e-13	0.484467	0.259417	0.133056	0.12306	UP_BMP
FAM111A	4	532.462	1.76944	0.232982	7.59475	3.08375e-14	4.31408e-13	0.661594	0.328504	0.00550842	0.00439358	UP_TGF
IER2	4	688.963	1.25763	0.16561	7.59394	3.10329e-14	4.33769e-13	0.868035	0.00695648	0.0409819	0.0840265	UP_TGF
CITED4	4	211.403	2.23877	0.294838	7.59322	3.12059e-14	4.35812e-13	0.392717	0.153285	0.00649091	0.447507	UP_TGF
FCHSD2	4	2569.68	0.963613	0.12695	7.59047	3.18741e-14	4.44384e-13	0.917706	0.00151012	0.0700566	0.0107269	UP_TGF
BRSK1	4	198.528	2.28326	0.300968	7.5864	3.28926e-14	4.58192e-13	0.741237	0.172695	0.0736439	0.0124245	UP_TGF
AKT1	4	8643.98	-1.23464	0.162796	-7.58401	3.35043e-14	4.65519e-13	0.485845	0.173309	0.0520245	0.288821	UP_BMP
SLC26A11	4	889.064	1.53226	0.20238	7.57122	3.69735e-14	5.10673e-13	0.394899	0.0183744	0.0883847	0.498342	UP_TGF
PTAR1	4	1263.03	-1.34301	0.177583	-7.56269	3.94828e-14	5.43949e-13	0.439777	0.17837	0.112899	0.268953	UP_BMP
ITIH5	4	2509.11	2.06242	0.272831	7.55933	4.05157e-14	5.57236e-13	0.681696	0.104381	0.196737	0.0171861	UP_TGF
LIMK1	4	1217.74	1.05674	0.140004	7.54791	4.42313e-14	6.06292e-13	0.405954	0.152913	0.216907	0.224226	UP_TGF
CAPG	4	845.684	1.6956	0.224687	7.5465	4.47118e-14	6.12364e-13	0.419229	0.0228878	0.0470674	0.510816	UP_TGF
PCYT2	4	2054.12	-1.68477	0.223317	-7.54431	4.54694e-14	6.22216e-13	0.207923	0.136612	0.189022	0.466444	UP_BMP
IMPAD1	4	7799.74	-0.925228	0.122797	-7.53463	4.89715e-14	6.68457e-13	0.311649	0.0249584	0.133547	0.529846	UP_BMP
TNFSF12	4	324.977	1.3414	0.178114	7.53111	5.03125e-14	6.85613e-13	0.766954	0.175557	0.047087	0.0104015	UP_TGF
DIP2C	4	4748.02	1.5989	0.21265	7.51891	5.52351e-14	7.51437e-13	0.377706	0.167003	0.389159	0.0661317	UP_TGF
NPIPA8	4	231.022	2.36549	0.314756	7.51532	5.67726e-14	7.71067e-13	0.548869	0.170909	0.105221	0.175	UP_TGF
ERRFI1	4	6272.79	-1.56577	0.208446	-7.51164	5.83893e-14	7.92363e-13	0.227468	0.0538223	0.283655	0.435054	UP_BMP
STON1	4	1716.81	-1.8818	0.250593	-7.5094	5.93996e-14	8.04733e-13	0.452936	0.0577668	0.00840294	0.480894	UP_BMP
C1QL4	4	207.336	3.62338	0.483282	7.49745	6.50725e-14	8.79396e-13	0.583152	0.259545	0.0538844	0.103418	UP_TGF
KIAA0232	4	2228.7	-1.35969	0.182474	-7.45142	9.23424e-14	1.23766e-12	0.479796	0.0599074	0.300382	0.159914	UP_BMP
DDX11	4	1249.23	1.64526	0.220837	7.45012	9.32585e-14	1.24891e-12	0.617291	0.0613658	0.0309908	0.290353	UP_TGF
EIF3H	4	9558.91	-0.981064	0.131916	-7.43705	1.02959e-13	1.3743e-12	0.623873	0.0640602	0.0363746	0.275693	UP_BMP
ROM1	4	119.899	2.01036	0.270731	7.42566	1.12217e-13	1.49543e-12	0.250405	0.300828	0.338846	0.109922	UP_TGF
PPEF1	4	144.849	2.15716	0.290554	7.4243	1.13382e-13	1.50972e-12	0.663422	0.112546	0.0177352	0.206296	UP_TGF
ZPR1	4	774.396	-1.29683	0.175024	-7.40944	1.26833e-13	1.68608e-12	0.898045	0.0307707	0.0631635	0.00802068	UP_BMP
HSD11B2	4	50.7192	-3.28686	0.44391	-7.40434	1.31807e-13	1.74792e-12	0.490307	0.0774481	0.216699	0.215545	UP_BMP
HNRNPA1	4	31475.8	0.936607	0.126528	7.40239	1.33758e-13	1.76947e-12	0.784934	0.0474949	0.0219556	0.145615	UP_TGF
MALT1	4	1945.88	-1.01566	0.137522	-7.38543	1.51959e-13	2.00699e-12	0.3419	0.117921	0.295443	0.244736	UP_BMP
HAS2	4	1052.91	-1.46112	0.198358	-7.36606	1.75746e-13	2.31178e-12	0.423511	0.0279713	0.122281	0.426237	UP_BMP
THBS1	4	64981.2	1.64479	0.223428	7.3616	1.8172e-13	2.38845e-12	0.675546	0.187184	0.0528938	0.0843757	UP_TGF
ZNF91	4	1044.2	-1.51594	0.206444	-7.34308	2.08731e-13	2.73121e-12	0.888325	0.00175679	0.011534	0.0983845	UP_BMP
RCCD1	4	579.321	1.5578	0.212346	7.33617	2.198e-13	2.86584e-12	0.820698	0.0549309	0.0120036	0.112367	UP_TGF
DCUN1D5	4	636.566	-1.24215	0.169437	-7.33103	2.28391e-13	2.97309e-12	0.749835	0.0877702	0.00101958	0.161375	UP_BMP
APMAP	4	2281.72	-1.36744	0.186695	-7.32446	2.39863e-13	3.11745e-12	0.364311	0.0798898	0.0224146	0.533384	UP_BMP
UBQLN1	4	3613.21	-0.877751	0.119984	-7.31555	2.56323e-13	3.32343e-12	0.903724	0.0222631	0.00577673	0.0682365	UP_BMP
ZNF444	4	502.69	1.49171	0.204373	7.29895	2.9002e-13	3.74544e-12	0.385305	0.113884	0.0503982	0.450413	UP_TGF
HSPB8	4	857.368	-1.55408	0.212987	-7.29658	2.95175e-13	3.80899e-12	0.273961	0.0475964	0.247418	0.431025	UP_BMP
GSG1L	4	94.2878	4.00761	0.549409	7.29441	2.99961e-13	3.86186e-12	0.691227	0.0144409	0.127803	0.166529	UP_TGF
PARP9	4	692.893	-1.3728	0.188313	-7.28999	3.0997e-13	3.98414e-12	0.832759	0.0504216	0.0151461	0.101674	UP_BMP
RGS13	4	53.6007	5.4191	0.74349	7.28874	3.12878e-13	4.01835e-12	0.507882	0.079261	0.15463	0.258227	UP_TGF
CSGALNACT1	4	2516.63	-2.27007	0.311574	-7.28579	3.1978e-13	4.10053e-12	0.490171	0.0400763	0.406187	0.0635659	UP_BMP
CYB5B	4	1895.96	-1.02902	0.141581	-7.26804	3.64747e-13	4.66246e-12	0.924771	0.0142375	0.0278953	0.0330967	UP_BMP
ATP10A	4	1963.29	1.23648	0.170197	7.26498	3.73099e-13	4.76549e-12	0.58519	0.369291	0.00976354	0.0357555	UP_TGF
SLC16A1	4	6054.23	-1.62332	0.223761	-7.25468	4.02606e-13	5.12231e-12	0.253551	0.136907	0.311665	0.297877	UP_BMP
TENM3	4	3926.25	0.977841	0.13482	7.25292	4.07894e-13	5.18554e-12	0.848524	0.0352171	0.0205441	0.0957148	UP_TGF
CHKA	4	1323.57	-1.85003	0.255353	-7.24501	4.32401e-13	5.48e-12	0.526145	0.0459371	0.136742	0.291176	UP_BMP
WDR91	4	1168.07	1.4021	0.193582	7.24289	4.39222e-13	5.56211e-12	0.371872	0.0474737	0.0951874	0.485467	UP_TGF
COX10	4	300.656	-1.32076	0.182601	-7.23302	4.7238e-13	5.96348e-12	0.866914	0.0478493	0.0132992	0.0719379	UP_BMP
SMG1P3	4	1761.89	-1.35454	0.187379	-7.22889	4.86973e-13	6.13819e-12	0.675956	0.108462	0.0605204	0.155061	UP_BMP
DNAH1	4	719.662	1.27155	0.175995	7.22493	5.01374e-13	6.30996e-12	0.539157	0.12323	0.0381235	0.29949	UP_TGF
ANO5	4	169.778	-2.6657	0.368968	-7.22474	5.02058e-13	6.31368e-12	0.857308	0.0126561	0.0843831	0.045653	UP_BMP
PHTF2	4	7053.99	-1.40215	0.194091	-7.22417	5.04189e-13	6.3356e-12	0.447465	0.29206	0.0132049	0.24727	UP_BMP
CLIC4	4	10143.4	-0.991092	0.137291	-7.21893	5.2399e-13	6.57934e-12	0.54086	0.199164	0.235936	0.0240392	UP_BMP
APBB3	4	862.815	1.19876	0.166554	7.19741	6.13689e-13	7.68786e-12	0.244836	0.0486008	0.168021	0.538543	UP_TGF
ACO2	4	2762.87	-1.29141	0.179539	-7.19293	6.34136e-13	7.9379e-12	0.59568	0.000414348	0.00561974	0.398286	UP_BMP
TGFB2	4	1096.93	-2.08206	0.289729	-7.1862	6.6617e-13	8.32611e-12	0.643264	0.136218	0.201495	0.0190243	UP_BMP
MATN2	4	2224.83	1.97679	0.27519	7.18336	6.80173e-13	8.4881e-12	0.596414	0.0720132	0.0154286	0.316145	UP_TGF
SUSD6	4	1886.4	1.0067	0.140191	7.1809	6.92562e-13	8.6361e-12	0.45857	0.134469	0.201459	0.205502	UP_TGF
DNER	4	441.045	-1.65413	0.230588	-7.1735	7.31022e-13	9.10175e-12	0.553536	0.0417566	0.0186712	0.386036	UP_BMP
DIAPH3	4	924.82	-2.04744	0.285583	-7.16934	7.536e-13	9.36855e-12	0.30366	0.00129587	0.124761	0.570283	UP_BMP
FAM107A	4	104.301	-2.76839	0.386171	-7.16882	7.56442e-13	9.39671e-12	0.444308	0.223975	0.0768159	0.254901	UP_BMP
[truncated: 2,088 more rows]

## Sheet: supplementary file 4f
baseMean	log2FoldChange	lfcSE	stat	pvalue	padj	GENEID	Name	Promoter-centric genes	Enhancer-centric genes	Combo-centric genes	DEG Biased
[truncated: 205 more rows]

[truncated: 3 more sheets: supplementary file 4g, supplementary file 4h, supplementary file 4i]
