# Supplementary material for: Lineage-specific differences and regulatory networks governing human chondrocyte development
Source: eLife. 2023 Mar 15;12:e79925. doi: 10.7554/eLife.79925 (PMC10069868; doi:10.7554/eLife.79925)
Supplement: Supplementary file 5. — (a) Overlapping ChIP-seq datasets with DA peaksets. Accessions listed in this sheet for RELA and RUNX2 correspond to those accessions listed in Supplementary file 5b- e. (b) Overlaps of RELA ChIP-seq datasets with BMP-biased peak sets. Column A: Whether or not the indicated region (Columns B-D) contained a FIMO-predicted motif hit for RELA. ‘Num_hits’: the number of ChIP-seq peaks (pooled across individual datasets) which overlapped the given region. ‘Hits':’ the individual overlapping ChIP-seq peaks, separated by ‘@’. ‘sources’ and ‘ID’ refers to the individual datasets corresponding to each ChIP-seq peak separated by ‘@’ in ‘Hits’ column. (c) Overlaps of RELA ChIP-seq datasets with TGF-biased peak sets. (d) Overlaps of RUNX2 ChIP-seq datasets with BMP-biased peak sets. (e) Overlaps of RUNX2 ChIP-seq datasets with TGF-biased peak sets. [file elife-79925-supp5.xlsx]

## Sheet: supplementary file 5a
RELA hypergeometric enrichments													RELA Dataset Accessions			RUNX2 Dataset Accessions
Region set	set	target_white	target_peaks	targ_perc	total_white	total_peaks	back_perc	pval	DIR	padj			ERX348279			SRX107411
COMBO_CENTRIC_BMP	RELA	405	805	0.5	2841	4720	0.6	2.83249e-10	DEPLETE	2.83249e-10			ERX348280			SRX1533882
COMBO_CENTRIC_TGF	RELA	725	1028	0.71	2841	4720	0.6	5.55112e-15	ENRICH	7.40149e-15			SRX017858			SRX2145568
ENHANCER_CENTRIC_BMP	RELA	865	1719	0.5	2841	4720	0.6	9.88058e-26	DEPLETE	1.97612e-25			SRX017859			SRX2145569
ENHANCER_CENTRIC_TGF	RELA	846	1168	0.72	2841	4720	0.6	< 1e-16	ENRICH	< 1e-16			SRX017860			SRX4484982
													SRX017863			SRX8472389
RUNX2 hypergeometric enrichments													SRX017864			SRX8472392
Region set	set	target_white	target_peaks	targ_perc	total_white	total_peaks	back_perc	pval	DIR	padj			SRX017865
COMBO_CENTRIC_BMP	RUNX2	305	805	0.38	1509	4720	0.32	5.43312e-05	ENRICH	7.24416e-05			SRX017866
COMBO_CENTRIC_TGF	RUNX2	262	1028	0.25	1509	4720	0.32	1.94265e-07	DEPLETE	7.77059e-07			SRX017867
ENHANCER_CENTRIC_BMP	RUNX2	612	1719	0.36	1509	4720	0.32	3.12851e-05	ENRICH	6.25702e-05			SRX017870
ENHANCER_CENTRIC_TGF	RUNX2	330	1168	0.28	1509	4720	0.32	0.000890417	DEPLETE	0.000890417			SRX017871
													SRX017872
													SRX017875
													SRX017876
													SRX017877
													SRX017878
													SRX017879
													SRX017882
													SRX017883
													SRX017884
													SRX017887
													SRX017888
													SRX017889
													SRX017890
													SRX017891
													SRX017894
													SRX017895
													SRX017896
													SRX017897
													SRX017900
													SRX017901
													SRX017902
													SRX017905
													SRX017906
													SRX017907
													SRX017908
													SRX017911
													SRX017912
													SRX017913
													SRX027908
													SRX027909
													SRX027910
													SRX027911
													SRX027912
													SRX027913
													SRX027914
													SRX027915
													SRX1044414
													SRX1044415
													SRX1044416
													SRX1100309
													SRX1100310
													SRX1100311
													SRX1100312
													SRX1100313
													SRX1100314
													SRX112015
													SRX112016
													SRX1457745
													SRX1457746
													SRX1457747
													SRX1457748
													SRX1460847
													SRX1460848
													SRX150353
													SRX150359
													SRX150361
													SRX150362
													SRX150365
													SRX150557
													SRX150605
													SRX150606
													SRX150608
													SRX150610
													SRX1672129
													SRX1672130
													SRX1672133
													SRX1672138
													SRX1672139
													SRX1885169
													SRX1885170
													SRX1885171
													SRX1885172
													SRX1885199
													SRX1885200
													SRX1885201
													SRX1885202
													SRX1885203
													SRX1885204
													SRX1885205
													SRX1885206
													SRX2055843
													SRX212182
													SRX212183
													SRX2207671
													SRX2207672
													SRX2207673
													SRX2255898
													SRX2255899
													SRX2255900
													SRX2255901
													SRX2270127
													SRX2270128
													SRX2270129
													SRX2355077
													SRX2355078
													SRX2355079
													SRX2355081
													SRX2355083
													SRX2355085
													SRX2404124
													SRX2404125
													SRX2404126
													SRX2404127
													SRX2404128
													SRX2404129
													SRX2404130
													SRX2404131
													SRX2404132
													SRX2404133
													SRX2404134
													SRX2404135
													SRX2404136
													SRX2404137
													SRX2404139
													SRX2404140
													SRX2404141
													SRX2404142
													SRX256997
													SRX256998
													SRX256999
													SRX257000
													SRX2837382
													SRX294971
													SRX3102570
													SRX3102571
													SRX3346352
													SRX3346353
													SRX3346356
													SRX3346357
													SRX359916
													SRX3636885
													SRX3638907
													SRX3638908
													SRX3638909
													SRX3638910
													SRX3638911
													SRX367012
													SRX367013
													SRX367014
													SRX367015
													SRX378804
													SRX378805
													SRX4001966
													SRX4001967
													SRX425262
													SRX425263
													SRX425264
													SRX4301468
													SRX4301469
													SRX4301470
													SRX4301471
													SRX4301472
													SRX4301473
													SRX4301474
													SRX4301475
													SRX4301476
													SRX4301477
													SRX4401061
													SRX4401062
													SRX4401063
													SRX4401064
													SRX4401065
													SRX4401066
													SRX4894934
													SRX4894935
													SRX4947719
													SRX4947720
													SRX4947721
													SRX5371742
													SRX5371743
													SRX5938176
													SRX5938177
													SRX7054609
													SRX7054610
													SRX7054611
													SRX7054612
													SRX7054613
													SRX7054614
													SRX7054615
													SRX7054616
													SRX7054617
													SRX7054618
													SRX7054619
													SRX7054620
													SRX7054621
													SRX7054622
													SRX7054623
													SRX7054624
													SRX7054657
													SRX7054658
													SRX7054659
													SRX7054660
													SRX7054661
													SRX7054662
													SRX7054663
													SRX7054664
													SRX7054665
													SRX7054666
													SRX7054667
													SRX7054668
													SRX7054669
													SRX7054670
													SRX7054671
													SRX7054672
													SRX7055004
													SRX7055005
													SRX7055006
													SRX7055007
													SRX7055008
													SRX7083406
													SRX747783
													SRX747789
													SRX747790
													SRX790965
													SRX790966
													SRX813772
													SRX813773
													SRX813774
													SRX968971
													SRX968972
													SRX968973
													SRX968974
													SRX968975
													SRX968976
													SRX968977
													SRX968978

## Sheet: supplementary file 5b
RELA ChIP-seq and Motif hits within BMP-biased peak sets (growth plate chondrocytes)
MOTIF_PRED	chr	start	end	gene	num_hits	hits	sources	ID
TRUE	chr8	145026292	145026542	OPLAH	156	chr8:145026056-145026592@chr8:145026056-145026592@chr8:145026101-145026598@chr8:145026101-145026598@chr8:145026104-145026566@chr8:145026104-145026566@chr8:145026104-145026610@chr8:145026104-145026610@chr8:145026120-145026523@chr8:145026120-145026523@chr8:145026127-145026597@chr8:145026127-145026597@chr8:145026130-145026551@chr8:145026130-145026551@chr8:145026153-145026504@chr8:145026153-145026504…	Kidney@Kidney@Blood@Blood@Kidney@Kidney@Cardiovascular@Cardiovascular@Kidney@Kidney@Cardiovascular@Cardiovascular@Cardiovascular@Cardiovascular@Cardiovascular@Cardiovascular@Cardiovascular@Cardiovascular@Blood@Blood@Cardiovascular@Cardiovascular@Blood@Blood@Blood@Blood@Blood@Blood@Breast@Breast@Others@Others@Cardiovascular@Cardiovascular@Others@Others@Others@Others@Breast@Breast@Cardiovascular@Ca…	SRX2055843@SRX2055843@SRX2837382@SRX2837382@SRX3346352@SRX3346352@SRX2207673@SRX2207673@SRX3636885@SRX3636885@SRX2207672@SRX2207672@SRX2355085@SRX2355085@SRX2355083@SRX2355083@SRX2355078@SRX2355078@SRX150605@SRX150605@SRX2355081@SRX2355081@SRX017912@SRX017912@SRX017911@SRX017911@SRX150353@SRX150353@SRX968977@SRX968977@SRX2404139@SRX2404139@SRX7054670@SRX7054670@SRX2404134@SRX2404134@SRX5938177@SR…
TRUE	chr8	145026292	145026542	EPPK1	156	chr8:145026056-145026592@chr8:145026056-145026592@chr8:145026101-145026598@chr8:145026101-145026598@chr8:145026104-145026566@chr8:145026104-145026566@chr8:145026104-145026610@chr8:145026104-145026610@chr8:145026120-145026523@chr8:145026120-145026523@chr8:145026127-145026597@chr8:145026127-145026597@chr8:145026130-145026551@chr8:145026130-145026551@chr8:145026153-145026504@chr8:145026153-145026504…	Kidney@Kidney@Blood@Blood@Kidney@Kidney@Cardiovascular@Cardiovascular@Kidney@Kidney@Cardiovascular@Cardiovascular@Cardiovascular@Cardiovascular@Cardiovascular@Cardiovascular@Cardiovascular@Cardiovascular@Blood@Blood@Cardiovascular@Cardiovascular@Blood@Blood@Blood@Blood@Blood@Blood@Breast@Breast@Others@Others@Cardiovascular@Cardiovascular@Others@Others@Others@Others@Breast@Breast@Cardiovascular@Ca…	SRX2055843@SRX2055843@SRX2837382@SRX2837382@SRX3346352@SRX3346352@SRX2207673@SRX2207673@SRX3636885@SRX3636885@SRX2207672@SRX2207672@SRX2355085@SRX2355085@SRX2355083@SRX2355083@SRX2355078@SRX2355078@SRX150605@SRX150605@SRX2355081@SRX2355081@SRX017912@SRX017912@SRX017911@SRX017911@SRX150353@SRX150353@SRX968977@SRX968977@SRX2404139@SRX2404139@SRX7054670@SRX7054670@SRX2404134@SRX2404134@SRX5938177@SR…
FALSE	chr3	113549569	113549819	NAA50	146	chr3:113549331-113550070@chr3:113549331-113550070@chr3:113549359-113550065@chr3:113549359-113550065@chr3:113549408-113549895@chr3:113549408-113549895@chr3:113549414-113549824@chr3:113549414-113549824@chr3:113549415-113549867@chr3:113549415-113549867@chr3:113549416-113549820@chr3:113549416-113549820@chr3:113549424-113549887@chr3:113549424-113549887@chr3:113549427-113549814@chr3:113549427-113549814…	Cardiovascular@Cardiovascular@Cardiovascular@Cardiovascular@Cardiovascular@Cardiovascular@Cardiovascular@Cardiovascular@Cardiovascular@Cardiovascular@Cardiovascular@Cardiovascular@Cardiovascular@Cardiovascular@Cardiovascular@Cardiovascular@Cardiovascular@Cardiovascular@Cardiovascular@Cardiovascular@Cardiovascular@Cardiovascular@Cardiovascular@Cardiovascular@Cardiovascular@Cardiovascular@Cardiovas…	SRX2207673@SRX2207673@SRX2207672@SRX2207672@SRX2207671@SRX2207671@SRX7054615@SRX7054615@SRX7054617@SRX7054617@SRX7054664@SRX7054664@SRX7054661@SRX7054661@SRX7054657@SRX7054657@SRX7054662@SRX7054662@SRX7054670@SRX7054670@SRX7054663@SRX7054663@SRX7054618@SRX7054618@SRX7054666@SRX7054666@SRX7054609@SRX7054609@SRX7055006@SRX7055006@SRX7055007@SRX7055007@SRX7054621@SRX7054621@SRX7054614@SRX7054614@SRX…
FALSE	chr3	113549569	113549819	ATP6V1A	146	chr3:113549331-113550070@chr3:113549331-113550070@chr3:113549359-113550065@chr3:113549359-113550065@chr3:113549408-113549895@chr3:113549408-113549895@chr3:113549414-113549824@chr3:113549414-113549824@chr3:113549415-113549867@chr3:113549415-113549867@chr3:113549416-113549820@chr3:113549416-113549820@chr3:113549424-113549887@chr3:113549424-113549887@chr3:113549427-113549814@chr3:113549427-113549814…	Cardiovascular@Cardiovascular@Cardiovascular@Cardiovascular@Cardiovascular@Cardiovascular@Cardiovascular@Cardiovascular@Cardiovascular@Cardiovascular@Cardiovascular@Cardiovascular@Cardiovascular@Cardiovascular@Cardiovascular@Cardiovascular@Cardiovascular@Cardiovascular@Cardiovascular@Cardiovascular@Cardiovascular@Cardiovascular@Cardiovascular@Cardiovascular@Cardiovascular@Cardiovascular@Cardiovas…	SRX2207673@SRX2207673@SRX2207672@SRX2207672@SRX2207671@SRX2207671@SRX7054615@SRX7054615@SRX7054617@SRX7054617@SRX7054664@SRX7054664@SRX7054661@SRX7054661@SRX7054657@SRX7054657@SRX7054662@SRX7054662@SRX7054670@SRX7054670@SRX7054663@SRX7054663@SRX7054618@SRX7054618@SRX7054666@SRX7054666@SRX7054609@SRX7054609@SRX7055006@SRX7055006@SRX7055007@SRX7055007@SRX7054621@SRX7054621@SRX7054614@SRX7054614@SRX…
TRUE	chr1	45196396	45196646	TMEM53	139	chr1:45196158-45196774@chr1:45196159-45196829@chr1:45196172-45196793@chr1:45196175-45197047@chr1:45196176-45197187@chr1:45196178-45197174@chr1:45196184-45197172@chr1:45196189-45196682@chr1:45196195-45197137@chr1:45196197-45196715@chr1:45196208-45197119@chr1:45196216-45197178@chr1:45196219-45197161@chr1:45196227-45197093@chr1:45196229-45196779@chr1:45196229-45197150@chr1:45196234-45196562@chr1:451…	Kidney@Cardiovascular@Cardiovascular@Kidney@Cardiovascular@Cardiovascular@Blood@Uterus@Others@Uterus@Cardiovascular@Cardiovascular@Cardiovascular@Blood@Others@Cardiovascular@Others@Cardiovascular@Others@Cardiovascular@Blood@Kidney@Cardiovascular@Others@Others@Cardiovascular@Blood@Blood@Cardiovascular@Cardiovascular@Prostate@Cardiovascular@Cardiovascular@Blood@Cardiovascular@Blood@Cardiovascular@B…	SRX2055843@SRX7054657@SRX7054615@SRX3636885@SRX2207673@SRX2207672@SRX150605@SRX027913@SRX5938177@SRX027912@SRX2355079@SRX7054661@SRX7054611@SRX2837382@SRX2404136@SRX7055004@SRX2404142@SRX2355085@SRX2404140@SRX7055007@SRX017891@SRX3346352@SRX7055006@SRX2404132@SRX2404134@SRX2355083@SRX150362@SRX150608@SRX7054664@SRX7054614@SRX1885200@SRX7054670@SRX7054618@SRX150557@SRX7054662@SRX017906@SRX7054609@…
FALSE	chr2	191878026	191880026	STAT1	132	chr2:191877853-191878063@chr2:191877860-191878035@chr2:191878507-191879298@chr2:191878663-191879186@chr2:191878669-191879216@chr2:191878677-191879232@chr2:191878678-191879230@chr2:191878697-191879212@chr2:191878705-191879167@chr2:191878708-191879215@chr2:191878711-191879194@chr2:191878714-191879148@chr2:191878716-191879206@chr2:191878718-191879131@chr2:191878718-191879195@chr2:191878720-191879151…	Cardiovascular@Cardiovascular@Digestive%20tract@Cardiovascular@Cardiovascular@Cardiovascular@Cardiovascular@Cardiovascular@Blood@Kidney@Cardiovascular@Liver@Cardiovascular@Blood@Cardiovascular@Cardiovascular@Cardiovascular@Cardiovascular@Cardiovascular@Cardiovascular@Cardiovascular@Blood@Bone@Cardiovascular@Cardiovascular@Blood@Bone@Cardiovascular@Cardiovascular@Blood@Blood@Cardiovascular@Cardiov…	SRX7055007@SRX7054615@SRX359916@SRX7054664@SRX7054661@SRX7054614@SRX7054671@SRX7054670@SRX017911@SRX3346352@SRX7054621@SRX2270129@SRX7054619@SRX017888@SRX7054618@SRX2355078@SRX2355079@SRX7054616@SRX7054666@SRX7054617@SRX7054662@SRX150606@SRX3638907@SRX2355083@SRX7054611@SRX150605@SRX3638911@SRX7055004@SRX7055008@SRX150608@SRX017872@SRX7054667@SRX7054615@SRX2055843@SRX2355077@SRX017887@SRX7054622@…
TRUE	chr5	133983424	133985424	SEC24A	126	chr5:133983462-133983645@chr5:133983518-133983682@chr5:133983558-133983964@chr5:133983610-133983947@chr5:133983645-133983891@chr5:133983717-133984529@chr5:133983730-133984507@chr5:133983744-133983954@chr5:133983757-133983926@chr5:133983762-133984322@chr5:133983764-133984508@chr5:133983768-133983911@chr5:133983799-133984583@chr5:133983908-133984871@chr5:133983925-133984445@chr5:133983971-133984594…	Adipocyte@Adipocyte@Cardiovascular@Cardiovascular@Cardiovascular@Cardiovascular@Cardiovascular@Cardiovascular@Cardiovascular@Blood@Others@Blood@Cardiovascular@Digestive%20tract@Others@Kidney@Blood@Blood@Blood@Blood@Blood@Blood@Others@Blood@Cardiovascular@Blood@Cardiovascular@Kidney@Blood@Kidney@Breast@Lung@Others@Others@Cardiovascular@Blood@Cardiovascular@Cardiovascular@Cardiovascular@Lung@Kidney…	SRX813772@SRX813773@SRX7055007@SRX7054666@SRX7054621@SRX2207672@SRX2207673@SRX7054614@SRX7054670@SRX150557@SRX5938177@SRX150359@SRX7054661@SRX359916@SRX2404136@SRX2055843@SRX150605@SRX150362@SRX017867@SRX017891@SRX150608@SRX150606@SRX2404134@SRX017912@SRX7055006@SRX150610@SRX7054617@SRX3346353@SRX017913@SRX3346352@SRX1100313@SRX1672133@SRX2404135@SRX2404132@SRX7054670@SRX2837382@SRX2355079@SRX425…
TRUE	chr17	41400913	41401163	TMEM106A	122	chr17:41399718-41401218@chr17:41399748-41401283@chr17:41399762-41401102@chr17:41399787-41400992@chr17:41399796-41401107@chr17:41399799-41401195@chr17:41399809-41401088@chr17:41399833-41401074@chr17:41399842-41401192@chr17:41399862-41401199@chr17:41399877-41401116@chr17:41399894-41401040@chr17:41399915-41400995@chr17:41399916-41401024@chr17:41399924-41401224@chr17:41399931-41401187@chr17:41399959-…	Kidney@Kidney@Blood@Blood@Others@Cardiovascular@Others@Others@Liver@Blood@Others@Others@Others@Others@Kidney@Cardiovascular@Others@Cardiovascular@Others@Cardiovascular@Kidney@Blood@Blood@Blood@Blood@Blood@Others@Kidney@Liver@Cardiovascular@Bone@Bone@Others@Cardiovascular@Cardiovascular@Blood@Cardiovascular@Digestive%20tract@Blood@Others@Blood@Cardiovascular@Blood@Breast@Cardiovascular@Cardiovascu…	SRX2055843@SRX3346352@SRX5371743@SRX5371742@SRX2404127@SRX294971@SRX2404124@SRX2404129@SRX2270129@SRX2837382@SRX2404125@SRX2404133@SRX2404140@SRX2404135@SRX3636885@SRX2207671@SRX2404126@SRX425263@SRX2404132@SRX425264@SRX3346353@SRX150605@SRX150608@SRX150606@SRX150362@SRX150353@SRX2404137@SRX3346356@SRX2270128@SRX2207672@SRX3638910@SRX3638911@SRX2404134@SRX7054662@SRX7054622@SRX150359@SRX2207673@S…
TRUE	chr10	103911032	103913032	NOLC1	118	chr10:103911215-103912222@chr10:103911231-103912208@chr10:103911290-103911527@chr10:103911299-103911479@chr10:103911315-103911457@chr10:103911535-103912477@chr10:103911624-103912198@chr10:103911632-103912081@chr10:103911643-103912240@chr10:103911650-103912164@chr10:103911666-103912226@chr10:103911674-103912256@chr10:103911676-103912133@chr10:103911676-103912222@chr10:103911680-103912213@chr10:103…	Cardiovascular@Cardiovascular@Cardiovascular@Cardiovascular@Cardiovascular@Digestive%20tract@Others@Kidney@Cardiovascular@Cardiovascular@Kidney@Cardiovascular@Blood@Cardiovascular@Cardiovascular@Kidney@Cardiovascular@Cardiovascular@Cardiovascular@Cardiovascular@Cardiovascular@Cardiovascular@Cardiovascular@Uterus@Cardiovascular@Cardiovascular@Cardiovascular@Cardiovascular@Blood@Blood@Others@Cardio…	SRX2207673@SRX2207672@SRX7054615@SRX7054661@SRX2355085@SRX359916@SRX5938177@SRX3346353@SRX7054661@SRX2355079@SRX2055843@SRX7054614@SRX2837382@SRX7055006@SRX2355085@SRX3346352@SRX7054666@SRX7054671@SRX2355083@SRX7055007@SRX7054611@SRX4947721@SRX7054670@SRX027912@SRX7054616@SRX7054662@SRX2355081@SRX7054621@SRX150353@SRX150605@SRX2404134@SRX7054663@SRX7055004@SRX7054618@SRX2404140@SRX7054657@SRX1505…
TRUE	chr4	2748000	2748250	TNIP2	117	chr4:2747639-2748401@chr4:2747744-2748407@chr4:2747762-2748355@chr4:2747767-2748170@chr4:2747768-2748297@chr4:2747770-2748393@chr4:2747774-2748370@chr4:2747776-2748396@chr4:2747781-2748178@chr4:2747784-2748389@chr4:2747802-2748389@chr4:2747803-2748297@chr4:2747803-2748346@chr4:2747805-2748368@chr4:2747805-2748381@chr4:2747806-2748415@chr4:2747807-2748376@chr4:2747807-2748383@chr4:2747808-2748216@…	Cardiovascular@Blood@Others@Others@Blood@Cardiovascular@Blood@Blood@Breast@Blood@Blood@Cardiovascular@Blood@Blood@Blood@Blood@Blood@Blood@Kidney@Blood@Cardiovascular@Blood@Others@Blood@Kidney@Blood@Blood@Others@Cardiovascular@Lung@Blood@Cardiovascular@Blood@Cardiovascular@Blood@Blood@Others@Blood@Blood@Blood@Blood@Others@Others@Blood@Others@Blood@Cardiovascular@Cardiovascular@Blood@Blood@Blood@Bl…	SRX2207673@SRX150605@SRX5938177@SRX2404139@SRX017911@SRX2207672@SRX017913@SRX150557@SRX1100313@SRX017912@SRX017906@SRX7054614@SRX017891@SRX150606@SRX150610@SRX2837382@SRX150353@SRX150359@SRX3346352@SRX017897@SRX7054661@SRX017859@SRX2404134@SRX150608@SRX2055843@SRX017871@SRX150362@SRX2404136@SRX425263@SRX212183@SRX017895@SRX7054666@SRX017865@SRX7055007@SRX017905@SRX017908@SRX2404132@SRX150365@SRX4…
FALSE	chr4	113152044	113154044	AP1AR	112	chr4:113152377-113152817@chr4:113152425-113152976@chr4:113152443-113152928@chr4:113152445-113152849@chr4:113152450-113152897@chr4:113152460-113152865@chr4:113152462-113153000@chr4:113152463-113152788@chr4:113152463-113152885@chr4:113152464-113152893@chr4:113152466-113152915@chr4:113152471-113152802@chr4:113152475-113152886@chr4:113152477-113152824@chr4:113152478-113152914@chr4:113152480-113152900…	Digestive%20tract@Cardiovascular@Cardiovascular@Others@Cardiovascular@Cardiovascular@Blood@Blood@Cardiovascular@Cardiovascular@Cardiovascular@Blood@Cardiovascular@Cardiovascular@Cardiovascular@Cardiovascular@Cardiovascular@Cardiovascular@Blood@Cardiovascular@Cardiovascular@Cardiovascular@Cardiovascular@Cardiovascular@Cardiovascular@Cardiovascular@Cardiovascular@Cardiovascular@Blood@Cardiovascular…	SRX359916@SRX7054611@SRX7054618@SRX5938177@SRX7055006@SRX2207673@SRX1460848@SRX150353@SRX2207672@SRX7054671@SRX7054666@SRX150605@SRX7055007@SRX7055004@SRX7054614@SRX7054661@SRX7054668@SRX7054662@SRX017912@SRX7054657@SRX7054621@SRX7054664@SRX7054619@SRX7054616@SRX7054667@SRX7054615@SRX7054617@SRX7054622@SRX150606@SRX7054670@SRX7054663@SRX7054609@SRX7054665@SRX2055843@SRX2355079@SRX7055008@SRX23550…
TRUE	chr4	39045900	39047900	KLHL5	111	chr4:39045533-39046386@chr4:39045876-39046230@chr4:39045891-39046443@chr4:39045892-39046354@chr4:39045913-39046631@chr4:39045924-39046230@chr4:39045924-39046233@chr4:39045924-39046242@chr4:39045925-39046281@chr4:39045926-39046378@chr4:39045927-39046390@chr4:39045928-39046441@chr4:39045931-39046397@chr4:39045932-39046317@chr4:39045932-39046404@chr4:39045932-39046422@chr4:39045937-39046223@chr4:390…	Cardiovascular@Blood@Cardiovascular@Cardiovascular@Kidney@Prostate@Blood@Blood@Blood@Cardiovascular@Kidney@Cardiovascular@Cardiovascular@Blood@Cardiovascular@Cardiovascular@Blood@Blood@Blood@Blood@Blood@Cardiovascular@Cardiovascular@Blood@Cardiovascular@Cardiovascular@Blood@Cardiovascular@Blood@Cardiovascular@Blood@Cardiovascular@Blood@Blood@Blood@Cardiovascular@Cardiovascular@Blood@Cardiovascula…	SRX2207672@SRX150557@SRX2355079@SRX2207673@SRX2055843@SRX1885171@SRX017913@SRX150606@SRX150605@SRX7054666@SRX3636885@SRX2355083@SRX7054661@SRX2837382@SRX7054614@SRX425263@SRX150610@SRX150353@SRX017906@SRX017871@SRX017891@SRX7054616@SRX7054617@SRX017911@SRX7054662@SRX2207671@SRX150362@SRX7055006@SRX150608@SRX7054618@SRX017912@SRX7054670@SRX017870@SRX017867@SRX150359@SRX425264@SRX7054619@SRX017908@…
TRUE	chr16	1429012	1429262	BAIAP3	109	chr16:1428865-1429629@chr16:1428874-1429250@chr16:1428879-1429642@chr16:1428880-1429393@chr16:1428909-1429333@chr16:1428909-1429392@chr16:1428916-1429415@chr16:1428918-1429280@chr16:1428918-1429376@chr16:1428921-1429344@chr16:1428922-1429382@chr16:1428924-1429311@chr16:1428924-1429335@chr16:1428929-1429649@chr16:1428930-1429349@chr16:1428931-1429358@chr16:1428934-1429368@chr16:1428935-1429378@chr…	Cardiovascular@Breast@Cardiovascular@Cardiovascular@Others@Cardiovascular@Cardiovascular@Cardiovascular@Cardiovascular@Cardiovascular@Cardiovascular@Others@Cardiovascular@Kidney@Cardiovascular@Cardiovascular@Cardiovascular@Cardiovascular@Cardiovascular@Cardiovascular@Cardiovascular@Cardiovascular@Cardiovascular@Others@Others@Cardiovascular@Cardiovascular@Cardiovascular@Others@Uterus@Cardiovascula…	SRX2207672@SRX968971@SRX2207673@SRX7054661@SRX5938177@SRX7054666@SRX7055007@SRX7054611@SRX2355083@SRX2355085@SRX7054670@SRX2404134@SRX7054618@SRX2055843@SRX7055004@SRX7054617@SRX7054662@SRX7054619@SRX7054622@SRX425263@SRX7054610@SRX7054665@SRX2355079@SRX2404135@SRX2404132@SRX7055006@SRX7054614@SRX7054657@SRX2404140@SRX027913@SRX7054615@SRX7054616@SRX747790@SRX968977@SRX1672130@SRX425264@SRX747789…
FALSE	chr16	85832672	85834672	COX4I1	109	chr16:85833045-85833372@chr16:85833065-85833434@chr16:85833080-85833379@chr16:85833083-85833399@chr16:85833086-85833336@chr16:85833087-85833427@chr16:85833090-85833312@chr16:85833090-85833352@chr16:85833090-85833368@chr16:85833092-85833390@chr16:85833093-85833280@chr16:85833094-85833465@chr16:85833096-85833395@chr16:85833102-85833370@chr16:85833103-85833387@chr16:85833104-85833338@chr16:85833104-…	Blood@Cardiovascular@Cardiovascular@Cardiovascular@Cardiovascular@Cardiovascular@Blood@Cardiovascular@Cardiovascular@Cardiovascular@Cardiovascular@Cardiovascular@Kidney@Cardiovascular@Cardiovascular@Cardiovascular@Cardiovascular@Blood@Cardiovascular@Cardiovascular@Cardiovascular@Cardiovascular@Cardiovascular@Cardiovascular@Cardiovascular@Cardiovascular@Blood@Cardiovascular@Cardiovascular@Blood@Bl…	SRX1460848@SRX7054671@SRX2207672@SRX7054611@SRX7054618@SRX7054622@SRX150608@SRX7054659@SRX2207673@SRX7054661@SRX7054665@SRX7054614@SRX3636885@SRX7054613@SRX7054664@SRX2355081@SRX7054657@SRX150605@SRX7054616@SRX7055007@SRX7055004@SRX7054666@SRX7054667@SRX7054617@SRX2355085@SRX7054668@SRX150365@SRX7054662@SRX7054621@SRX150353@SRX150606@SRX2355078@SRX7055008@SRX7054609@SRX7054619@SRX7054663@SRX70546…
FALSE	chr19	59031125	59031375	UBE2M	106	chr19:59030663-59031679@chr19:59030915-59031425@chr19:59030926-59031434@chr19:59030930-59031441@chr19:59030934-59031567@chr19:59030936-59031488@chr19:59030937-59031519@chr19:59030946-59031349@chr19:59030948-59031459@chr19:59030952-59031432@chr19:59030961-59031340@chr19:59030965-59031221@chr19:59030966-59031362@chr19:59030966-59031439@chr19:59030968-59031383@chr19:59030972-59031403@chr19:59030977-…	Digestive%20tract@Cardiovascular@Blood@Cardiovascular@Cardiovascular@Cardiovascular@Cardiovascular@Cardiovascular@Cardiovascular@Cardiovascular@Cardiovascular@Breast@Kidney@Cardiovascular@Cardiovascular@Blood@Blood@Cardiovascular@Cardiovascular@Cardiovascular@Blood@Cardiovascular@Cardiovascular@Blood@Cardiovascular@Cardiovascular@Breast@Cardiovascular@Blood@Cardiovascular@Cardiovascular@Cardiovas…	SRX359916@SRX2355079@SRX2837382@SRX2355085@SRX7054614@SRX7054661@SRX7054671@SRX7054667@SRX7054615@SRX7054611@SRX425264@SRX968978@SRX3636885@SRX2355078@SRX7055004@SRX4401064@SRX1460848@SRX7054657@SRX2207672@SRX7054670@SRX150353@SRX7055007@SRX2207673@SRX150605@SRX7054619@SRX7055006@SRX968976@SRX7054666@SRX1460847@SRX7054617@SRX7054665@SRX7054616@SRX3346352@SRX4401062@SRX2355083@SRX7054663@SRX705461…
TRUE	chr5	31638416	31640416	PDZD2	106	chr5:31638644-31639284@chr5:31638671-31639292@chr5:31638863-31639327@chr5:31638871-31639359@chr5:31638874-31639360@chr5:31638890-31639274@chr5:31638899-31639253@chr5:31638900-31639299@chr5:31638908-31639208@chr5:31638909-31639224@chr5:31638913-31639358@chr5:31638915-31639282@chr5:31638917-31639264@chr5:31638930-31639279@chr5:31638934-31639283@chr5:31638936-31639509@chr5:31638938-31639268@chr5:316…	Blood@Blood@Others@Cardiovascular@Others@Others@Blood@Others@Lung@Blood@Cardiovascular@Others@Blood@Cardiovascular@Cardiovascular@Kidney@Cardiovascular@Cardiovascular@Kidney@Cardiovascular@Others@Cardiovascular@Cardiovascular@Cardiovascular@Others@Cardiovascular@Blood@Others@Cardiovascular@Breast@Uterus@Lung@Others@Cardiovascular@Others@Breast@Cardiovascular@Cardiovascular@Cardiovascular@Others@C…	SRX150605@SRX2837382@SRX5938177@SRX2207672@SRX2404140@SRX2404137@SRX017912@SRX2404136@SRX212183@SRX150557@SRX2207673@SRX2404135@SRX017913@SRX7054617@SRX7054661@SRX2055843@SRX7054616@SRX7054614@SRX3636885@SRX7054665@SRX2404132@SRX7054666@SRX7055007@SRX7054657@SRX2404134@SRX7054611@SRX150353@SRX2404139@SRX7054612@SRX968976@SRX378805@SRX1672133@SRX2404141@SRX294971@SRX2404142@SRX1100313@SRX7054618@S…
TRUE	chr22	50329764	50330014	PIM3	102	chr22:50329548-50330051@chr22:50329606-50330057@chr22:50329639-50330053@chr22:50329651-50330178@chr22:50329651-50330179@chr22:50329662-50330118@chr22:50329664-50330051@chr22:50329666-50330089@chr22:50329673-50330094@chr22:50329679-50330126@chr22:50329680-50330009@chr22:50329680-50330133@chr22:50329685-50330099@chr22:50329688-50330087@chr22:50329692-50329984@chr22:50329693-50330124@chr22:50329694-…	Kidney@Kidney@Cardiovascular@Cardiovascular@Cardiovascular@Cardiovascular@Cardiovascular@Cardiovascular@Cardiovascular@Cardiovascular@Cardiovascular@Cardiovascular@Cardiovascular@Cardiovascular@Blood@Cardiovascular@Cardiovascular@Cardiovascular@Cardiovascular@Cardiovascular@Cardiovascular@Cardiovascular@Cardiovascular@Cardiovascular@Cardiovascular@Liver@Cardiovascular@Cardiovascular@Cardiovascula…	SRX3346352@SRX2055843@SRX2355083@SRX4947720@SRX112016@SRX2355085@SRX7054614@SRX4947721@SRX425263@SRX7055007@SRX2355079@SRX7054670@SRX7054663@SRX2355078@SRX4001967@SRX7054666@SRX2355081@SRX7055004@SRX294971@SRX2207672@SRX7054671@SRX7054664@SRX7054619@SRX2207673@SRX7054618@SRX2270129@SRX7055006@SRX425264@SRX7054611@SRX7054617@SRX7055008@SRX7054621@SRX7054609@SRX2404132@SRX7054657@SRX2837382@SRX7054…
TRUE	chr11	61740290	61740540	BEST1	98	chr11:61740019-61740573@chr11:61740025-61740457@chr11:61740026-61740566@chr11:61740059-61740650@chr11:61740073-61740515@chr11:61740078-61740633@chr11:61740088-61740550@chr11:61740088-61740574@chr11:61740090-61740586@chr11:61740100-61740582@chr11:61740100-61740605@chr11:61740101-61740616@chr11:61740103-61740579@chr11:61740104-61740571@chr11:61740105-61740525@chr11:61740106-61740577@chr11:61740107-…	Lung@Kidney@Lung@Others@Lung@Kidney@Others@Cardiovascular@Others@Uterus@Cardiovascular@Cardiovascular@Uterus@Cardiovascular@Cardiovascular@Others@Cardiovascular@Cardiovascular@Cardiovascular@Lung@Digestive%20tract@Cardiovascular@Cardiovascular@Others@Cardiovascular@Others@Cardiovascular@Cardiovascular@Cardiovascular@Others@Cardiovascular@Cardiovascular@Cardiovascular@Blood@Blood@Cardiovascular@Ca…	SRX1672130@SRX3636885@SRX212183@SRX5938177@SRX1672129@SRX2055843@SRX2404132@SRX7055007@SRX2404140@SRX027912@SRX2207673@SRX7054661@SRX027913@SRX7054614@SRX7055008@SRX2404134@SRX2355083@SRX2355079@SRX7054617@SRX1672133@SRX3102571@SRX7054619@SRX7055005@SRX2404135@SRX7054666@SRX2404137@SRX7055004@SRX7055006@SRX7054615@SRX2404141@SRX7054665@SRX7054668@SRX7054621@SRX150605@SRX017913@SRX7054657@SRX22076…
TRUE	chr17	73871706	73873706	TRIM47	95	chr17:73871829-73872033@chr17:73872192-73872431@chr17:73872203-73872434@chr17:73873093-73873587@chr17:73873111-73873626@chr17:73873126-73873663@chr17:73873133-73873671@chr17:73873148-73873667@chr17:73873155-73873561@chr17:73873157-73873637@chr17:73873158-73873638@chr17:73873161-73873615@chr17:73873162-73873616@chr17:73873164-73873598@chr17:73873165-73873621@chr17:73873167-73873596@chr17:73873168-…	Cardiovascular@Cardiovascular@Cardiovascular@Kidney@Others@Cardiovascular@Cardiovascular@Cardiovascular@Others@Cardiovascular@Cardiovascular@Kidney@Cardiovascular@Others@Cardiovascular@Kidney@Lung@Others@Cardiovascular@Cardiovascular@Cardiovascular@Lung@Cardiovascular@Cardiovascular@Others@Others@Cardiovascular@Cardiovascular@Cardiovascular@Cardiovascular@Cardiovascular@Cardiovascular@Cardiovascu…	SRX2207672@SRX2207673@SRX2207672@SRX2055843@SRX5938177@SRX2207672@SRX2207673@SRX7054661@SRX2404132@SRX7054666@SRX425264@SRX3636885@SRX2355083@SRX2404134@SRX7055007@SRX3346352@SRX1672133@SRX2404137@SRX7054619@SRX7054617@SRX7055006@SRX212183@SRX7054614@SRX7054670@SRX2404140@SRX2404139@SRX7054616@SRX2355085@SRX7054611@SRX7055004@SRX7054664@SRX7054621@SRX4947721@SRX7054668@SRX2355079@SRX7054665@SRX24…
TRUE	chr7	107530401	107532401	DLD	95	chr7:107531282-107532001@chr7:107531330-107531499@chr7:107531384-107531864@chr7:107531399-107531710@chr7:107531405-107531770@chr7:107531439-107531586@chr7:107531453-107531589@chr7:107531453-107531623@chr7:107531454-107532401@chr7:107531456-107531661@chr7:107531459-107531814@chr7:107531466-107532361@chr7:107531468-107531675@chr7:107531474-107531621@chr7:107531474-107531658@chr7:107531477-107531652…	Digestive%20tract@Blood@Cardiovascular@Blood@Cardiovascular@Blood@Cardiovascular@Cardiovascular@Cardiovascular@Cardiovascular@Cardiovascular@Kidney@Cardiovascular@Cardiovascular@Cardiovascular@Cardiovascular@Cardiovascular@Uterus@Uterus@Cardiovascular@Cardiovascular@Blood@Bone@Blood@Kidney@Cardiovascular@Others@Cardiovascular@Blood@Cardiovascular@Blood@Kidney@Breast@Cardiovascular@Others@Breast@C…	SRX359916@SRX150557@SRX7054666@SRX150605@SRX7054611@SRX150608@SRX7054609@SRX7054615@SRX7054661@SRX2207672@SRX7054671@SRX2055843@SRX7054670@SRX2355078@SRX2207673@SRX2355085@SRX7054614@SRX378805@SRX378804@SRX7054616@SRX7054622@SRX1460848@SRX3638907@SRX150362@SRX3346352@SRX4947721@SRX2404140@SRX7054614@SRX1460848@SRX2207673@SRX2837382@SRX3346353@SRX968976@SRX2207672@SRX2404134@SRX1100313@SRX2355083@…
FALSE	chr1	28831504	28833504	RCC1	91	chr1:28832096-28832707@chr1:28832134-28832516@chr1:28832138-28832636@chr1:28832138-28832711@chr1:28832139-28832658@chr1:28832154-28832617@chr1:28832187-28832546@chr1:28832204-28832691@chr1:28832211-28832663@chr1:28832220-28832578@chr1:28832232-28832605@chr1:28832232-28832676@chr1:28832235-28832688@chr1:28832236-28832341@chr1:28832239-28832640@chr1:28832243-28832739@chr1:28832249-28832427@chr1:288…	Cardiovascular@Digestive%20tract@Cardiovascular@Cardiovascular@Cardiovascular@Cardiovascular@Cardiovascular@Cardiovascular@Cardiovascular@Cardiovascular@Cardiovascular@Cardiovascular@Cardiovascular@Blood@Cardiovascular@Cardiovascular@Cardiovascular@Cardiovascular@Cardiovascular@Cardiovascular@Cardiovascular@Others@Cardiovascular@Cardiovascular@Cardiovascular@Blood@Cardiovascular@Cardiovascular@Ca…	SRX7054661@SRX359916@SRX7054666@SRX7054611@SRX2207672@SRX2207673@SRX2355083@SRX7054614@SRX2355085@SRX2355081@SRX7055007@SRX7055006@SRX7054670@SRX150608@SRX7054617@SRX7054665@SRX7054612@SRX7054619@SRX7054662@SRX2355078@SRX2355079@SRX5938177@SRX7054671@SRX7054618@SRX7054621@SRX150605@SRX2207671@SRX4947721@SRX7055004@SRX7054616@SRX7054610@SRX7054672@SRX150606@SRX7055008@SRX7054664@SRX7055005@SRX7054…
TRUE	chr22	31686570	31688570	PIK3IP1	87	chr22:31686604-31687089@chr22:31686606-31687074@chr22:31686616-31687080@chr22:31686650-31687016@chr22:31686660-31687103@chr22:31686662-31687043@chr22:31686665-31687018@chr22:31686666-31687099@chr22:31686668-31687046@chr22:31686677-31687056@chr22:31686678-31687041@chr22:31686682-31687013@chr22:31686685-31687075@chr22:31686688-31687085@chr22:31686691-31687083@chr22:31686692-31687014@chr22:31686693-…	Cardiovascular@Kidney@Cardiovascular@Others@Cardiovascular@Cardiovascular@Cardiovascular@Cardiovascular@Cardiovascular@Cardiovascular@Cardiovascular@Blood@Cardiovascular@Cardiovascular@Cardiovascular@Cardiovascular@Cardiovascular@Cardiovascular@Blood@Cardiovascular@Kidney@Cardiovascular@Cardiovascular@Cardiovascular@Cardiovascular@Cardiovascular@Cardiovascular@Cardiovascular@Cardiovascular@Cardio…	SRX2207672@SRX3636885@SRX7054671@SRX5938177@SRX2207673@SRX7054616@SRX7054664@SRX7054661@SRX7054666@SRX7054657@SRX7055006@SRX150353@SRX7054618@SRX7054617@SRX7054615@SRX7055008@SRX7054669@SRX7054670@SRX1460848@SRX7054611@SRX3346352@SRX7054622@SRX4947721@SRX7055007@SRX7054614@SRX2355085@SRX7054662@SRX2355081@SRX2355079@SRX7054659@SRX2055843@SRX2404140@SRX7054667@SRX2837382@SRX2355078@SRX7054668@SRX0…
FALSE	chr2	224821020	224823020	MRPL44	86	chr2:224821767-224822232@chr2:224821776-224822290@chr2:224821777-224822226@chr2:224821781-224822271@chr2:224821789-224822323@chr2:224821791-224822239@chr2:224821792-224822298@chr2:224821796-224822215@chr2:224821800-224822259@chr2:224821809-224822212@chr2:224821822-224822200@chr2:224821824-224822224@chr2:224821827-224822174@chr2:224821828-224822192@chr2:224821831-224822261@chr2:224821831-224822265…	Cardiovascular@Cardiovascular@Cardiovascular@Cardiovascular@Cardiovascular@Cardiovascular@Cardiovascular@Cardiovascular@Cardiovascular@Cardiovascular@Cardiovascular@Cardiovascular@Cardiovascular@Cardiovascular@Cardiovascular@Cardiovascular@Cardiovascular@Cardiovascular@Cardiovascular@Cardiovascular@Cardiovascular@Cardiovascular@Cardiovascular@Cardiovascular@Cardiovascular@Cardiovascular@Cardiovas…	SRX7054666@SRX7054661@SRX7055007@SRX7054611@SRX7054614@SRX7055006@SRX7054671@SRX7054621@SRX7054622@SRX7054618@SRX7054670@SRX7055008@SRX7054616@SRX7054668@SRX7054619@SRX7055004@SRX7054664@SRX7054662@SRX7054609@SRX7054615@SRX7054617@SRX7054667@SRX2355085@SRX2355079@SRX7054659@SRX2207672@SRX7055005@SRX7054672@SRX7054663@SRX7054669@SRX7054657@SRX2355081@SRX7054610@SRX150605@SRX813773@SRX1460848@SRX22…
TRUE	chr11	64037438	64037688	ESRRA	85	chr11:64037184-64037442@chr11:64037216-64037692@chr11:64037233-64037815@chr11:64037266-64037875@chr11:64037272-64037730@chr11:64037274-64037714@chr11:64037275-64037728@chr11:64037279-64037804@chr11:64037282-64037713@chr11:64037286-64037734@chr11:64037288-64037626@chr11:64037289-64037633@chr11:64037292-64037689@chr11:64037293-64037504@chr11:64037293-64037854@chr11:64037297-64037692@chr11:64037302-…	Bone@Cardiovascular@Cardiovascular@Cardiovascular@Cardiovascular@Cardiovascular@Cardiovascular@Cardiovascular@Cardiovascular@Cardiovascular@Kidney@Others@Cardiovascular@Blood@Blood@Cardiovascular@Cardiovascular@Cardiovascular@Blood@Cardiovascular@Cardiovascular@Cardiovascular@Cardiovascular@Cardiovascular@Cardiovascular@Cardiovascular@Cardiovascular@Others@Others@Cardiovascular@Cardiovascular@Adi…	SRX3638907@SRX7054622@SRX7054661@SRX2207672@SRX7055004@SRX7054614@SRX7054666@SRX2207673@SRX7054619@SRX7054664@SRX2055843@SRX2404132@SRX2355083@SRX017911@SRX150605@SRX7055006@SRX7055007@SRX2355085@SRX150606@SRX7054670@SRX2355081@SRX7054611@SRX7054621@SRX7054616@SRX7055008@SRX7054671@SRX7054617@SRX2404140@SRX2404134@SRX7054667@SRX7054618@SRX813774@SRX2837382@SRX7054615@SRX2355079@SRX7054663@SRX7054…
TRUE	chr6	12010973	12012973	HIVEP1	84	chr6:12011186-12011701@chr6:12011208-12011596@chr6:12011214-12011704@chr6:12011231-12011713@chr6:12011243-12011463@chr6:12011249-12011493@chr6:12011262-12011469@chr6:12011273-12011504@chr6:12011276-12011612@chr6:12011281-12011530@chr6:12011281-12011814@chr6:12011284-12011503@chr6:12011288-12011429@chr6:12011291-12011485@chr6:12011291-12011493@chr6:12011296-12011447@chr6:12011296-12011463@chr6:120…	Blood@Blood@Blood@Kidney@Cardiovascular@Blood@Blood@Blood@Blood@Blood@Cardiovascular@Blood@Blood@Blood@Blood@Blood@Cardiovascular@Blood@Cardiovascular@Blood@Cardiovascular@Blood@Cardiovascular@Cardiovascular@Blood@Blood@Blood@Cardiovascular@Kidney@Blood@Cardiovascular@Cardiovascular@Blood@Cardiovascular@Cardiovascular@Blood@Cardiovascular@Cardiovascular@Blood@Cardiovascular@Blood@Blood@Cardiovasc…	SRX2837382@SRX017912@SRX150605@SRX2055843@SRX2207672@SRX150557@SRX017906@SRX150353@SRX150359@SRX017913@SRX7054664@SRX017871@SRX017907@SRX150606@SRX150610@SRX017891@SRX2207673@SRX150362@SRX7055007@SRX150608@SRX7054665@SRX017860@SRX2355079@SRX7054661@SRX017865@SRX017911@SRX017908@SRX7055006@SRX3346352@SRX017872@SRX2355083@SRX7054610@SRX017884@SRX7054614@SRX7055004@SRX017859@SRX7055008@SRX7054621@SR…
FALSE	chr4	114682033	114684033	CAMK2D	83	chr4:114682294-114682514@chr4:114682456-114682660@chr4:114682462-114682673@chr4:114682841-114683079@chr4:114682932-114683164@chr4:114682965-114683088@chr4:114682977-114683082@chr4:114682981-114683096@chr4:114682983-114683226@chr4:114682984-114683231@chr4:114682997-114683102@chr4:114682999-114683189@chr4:114683001-114683171@chr4:114683007-114683145@chr4:114683009-114684091@chr4:114683010-114683142…	Cardiovascular@Cardiovascular@Cardiovascular@Kidney@Blood@Blood@Uterus@Blood@Cardiovascular@Cardiovascular@Blood@Blood@Blood@Blood@Blood@Blood@Cardiovascular@Kidney@Blood@Blood@Blood@Blood@Blood@Digestive%20tract@Blood@Cardiovascular@Blood@Cardiovascular@Blood@Blood@Cardiovascular@Blood@Blood@Cardiovascular@Blood@Cardiovascular@Blood@Blood@Blood@Bone@Blood@Cardiovascular@Blood@Cardiovascular@Card…	SRX7054614@SRX7055007@SRX7054671@SRX2055843@SRX4401064@SRX1460848@SRX378805@SRX4401063@SRX2207672@SRX2207673@SRX4401061@SRX150353@SRX1460847@SRX150610@SRX150605@SRX017895@SRX2207672@SRX2055843@SRX150610@SRX2837382@SRX150608@SRX017911@SRX150353@SRX359916@SRX1460847@SRX2207673@SRX017913@SRX7054661@SRX017878@SRX017912@SRX2355083@SRX150610@SRX150362@SRX7054670@SRX150557@SRX7054666@SRX150606@SRX150365…
TRUE	chr17	66016022	66016272	C17orf58	81	chr17:66015797-66016239@chr17:66015827-66016205@chr17:66015828-66016298@chr17:66015835-66016247@chr17:66015835-66016258@chr17:66015835-66016400@chr17:66015844-66016241@chr17:66015845-66016154@chr17:66015871-66016250@chr17:66015872-66016372@chr17:66015876-66016172@chr17:66015878-66016313@chr17:66015878-66016374@chr17:66015880-66016358@chr17:66015882-66016090@chr17:66015890-66016424@chr17:66015892-…	Cardiovascular@Digestive%20tract@Cardiovascular@Cardiovascular@Blood@Cardiovascular@Cardiovascular@Blood@Blood@Cardiovascular@Blood@Cardiovascular@Cardiovascular@Blood@Lung@Cardiovascular@Cardiovascular@Blood@Cardiovascular@Blood@Cardiovascular@Blood@Blood@Adipocyte@Cardiovascular@Cardiovascular@Blood@Blood@Cardiovascular@Cardiovascular@Kidney@Blood@Blood@Cardiovascular@Blood@Blood@Cardiovascular…	SRX7054661@SRX359916@SRX7054666@SRX7055006@SRX150359@SRX2207672@SRX7054611@SRX150362@SRX150353@SRX7054671@SRX150557@SRX2207673@SRX7054621@SRX150605@SRX212183@SRX7054614@SRX7055007@SRX150606@SRX7054657@SRX017912@SRX7054670@SRX150610@SRX017895@SRX813773@SRX7054618@SRX7054662@SRX017871@SRX017913@SRX7054664@SRX425264@SRX2055843@SRX017878@SRX150608@SRX7054668@SRX4001967@SRX017897@SRX7054615@SRX7054617…
FALSE	chr22	39076703	39078703	TOMM22	79	chr22:39077661-39078172@chr22:39077710-39078121@chr22:39077711-39078114@chr22:39077731-39078209@chr22:39077738-39078143@chr22:39077745-39078145@chr22:39077748-39078333@chr22:39077751-39078141@chr22:39077760-39078144@chr22:39077761-39078162@chr22:39077765-39078140@chr22:39077767-39078149@chr22:39077770-39078052@chr22:39077771-39078046@chr22:39077778-39078096@chr22:39077778-39078110@chr22:39077785-…	Blood@Cardiovascular@Cardiovascular@Cardiovascular@Cardiovascular@Cardiovascular@Digestive%20tract@Cardiovascular@Cardiovascular@Blood@Cardiovascular@Cardiovascular@Kidney@Cardiovascular@Others@Cardiovascular@Cardiovascular@Cardiovascular@Cardiovascular@Blood@Cardiovascular@Cardiovascular@Cardiovascular@Cardiovascular@Blood@Cardiovascular@Cardiovascular@Kidney@Cardiovascular@Kidney@Cardiovascular…	SRX150605@SRX7054671@SRX7054611@SRX7054661@SRX7055004@SRX7054666@SRX359916@SRX7054618@SRX7054664@SRX017912@SRX7054622@SRX7054614@SRX3346352@SRX7054670@SRX5938177@SRX2355085@SRX2207673@SRX7055007@SRX2207672@SRX4001967@SRX7054619@SRX425264@SRX7055006@SRX7054610@SRX150362@SRX7054615@SRX2355079@SRX3636885@SRX7054669@SRX2055843@SRX7054621@SRX7054612@SRX2837382@SRX7055008@SRX150606@SRX2355078@SRX705466…
FALSE	chr1	226084847	226085097	EPHX1	77	chr1:226084805-226085199@chr1:226084810-226085247@chr1:226084824-226085245@chr1:226084834-226085165@chr1:226084835-226085219@chr1:226084846-226085210@chr1:226084862-226085179@chr1:226084865-226085134@chr1:226084866-226085223@chr1:226084867-226085218@chr1:226084869-226085232@chr1:226084871-226085185@chr1:226084873-226085198@chr1:226084875-226085183@chr1:226084875-226085211@chr1:226084881-226085161…	Kidney@Others@Blood@Others@Breast@Kidney@Kidney@Digestive%20tract@Others@Others@Blood@Blood@Others@Blood@Others@Blood@Blood@Blood@Blood@Blood@Others@Blood@Blood@Blood@Blood@Blood@Cardiovascular@Blood@Breast@Blood@Cardiovascular@Others@Blood@Blood@Others@Blood@Blood@Blood@Blood@Blood@Blood@Blood@Blood@Others@Blood@Blood@Cardiovascular@Blood@Blood@Others@Blood@Prostate@Blood@Blood@Blood@Uterus@Bloo…	SRX3636885@SRX5938177@SRX150605@SRX2404142@SRX1100313@SRX2055843@SRX3346352@SRX3102571@SRX2404140@SRX2404136@SRX017913@SRX2837382@SRX2404135@SRX017912@SRX2404137@SRX017889@SRX017906@SRX150557@SRX150353@SRX150608@SRX2404134@SRX150606@SRX150359@SRX017911@SRX150365@SRX150362@SRX2207672@SRX017883@SRX968976@SRX150610@SRX2207673@SRX2404139@SRX017891@SRX4401064@SRX2404141@SRX017897@SRX017884@SRX017871@S…
TRUE	chr9	18393367	18393617	ADAMTSL1	75	chr9:18393178-18394098@chr9:18393190-18394083@chr9:18393193-18394174@chr9:18393214-18393625@chr9:18393216-18393969@chr9:18393217-18393656@chr9:18393217-18393668@chr9:18393222-18393739@chr9:18393223-18393926@chr9:18393224-18393634@chr9:18393231-18393650@chr9:18393231-18393701@chr9:18393232-18393595@chr9:18393234-18393960@chr9:18393236-18393606@chr9:18393239-18393635@chr9:18393242-18393673@chr9:183…	Others@Cardiovascular@Cardiovascular@Cardiovascular@Cardiovascular@Cardiovascular@Cardiovascular@Cardiovascular@Cardiovascular@Cardiovascular@Cardiovascular@Cardiovascular@Cardiovascular@Cardiovascular@Cardiovascular@Cardiovascular@Cardiovascular@Cardiovascular@Cardiovascular@Cardiovascular@Cardiovascular@Cardiovascular@Cardiovascular@Cardiovascular@Cardiovascular@Cardiovascular@Cardiovascular@Ca…	SRX5938177@SRX2207673@SRX2207672@SRX7054666@SRX7055007@SRX7054616@SRX425264@SRX7054614@SRX7054617@SRX7055004@SRX7054665@SRX7054661@SRX7055005@SRX7054615@SRX7054618@SRX7054663@SRX7054657@SRX7054619@SRX7054610@SRX7054670@SRX7054664@SRX7054621@SRX7054667@SRX7055006@SRX7054611@SRX2355083@SRX2207671@SRX7054662@SRX7054671@SRX7054668@SRX2055843@SRX1672130@SRX2404135@SRX2404134@SRX7055008@SRX2404140@SRX7…
FALSE	chr5	175863710	175863960	CLTB	74	chr5:175863638-175864012@chr5:175863638-175864012@chr5:175863644-175863973@chr5:175863644-175863973@chr5:175863661-175863992@chr5:175863661-175863992@chr5:175863673-175863924@chr5:175863673-175863924@chr5:175863681-175863997@chr5:175863681-175863997@chr5:175863684-175863961@chr5:175863684-175863961@chr5:175863684-175863995@chr5:175863684-175863995@chr5:175863685-175863966@chr5:175863685-175863966…	Cardiovascular@Cardiovascular@Cardiovascular@Cardiovascular@Cardiovascular@Cardiovascular@Cardiovascular@Cardiovascular@Cardiovascular@Cardiovascular@Cardiovascular@Cardiovascular@Cardiovascular@Cardiovascular@Cardiovascular@Cardiovascular@Cardiovascular@Cardiovascular@Cardiovascular@Cardiovascular@Cardiovascular@Cardiovascular@Cardiovascular@Cardiovascular@Cardiovascular@Cardiovascular@Cardiovas…	SRX7054661@SRX7054661@SRX7054666@SRX7054666@SRX7054614@SRX7054614@SRX7054617@SRX7054617@SRX7055006@SRX7055006@SRX7054618@SRX7054618@SRX7055007@SRX7055007@SRX7054621@SRX7054621@SRX7054615@SRX7054615@SRX7054662@SRX7054662@SRX7054619@SRX7054619@SRX7054611@SRX7054611@SRX7054668@SRX7054668@SRX7054616@SRX7054616@SRX7055008@SRX7055008@SRX7055005@SRX7055005@SRX7054670@SRX7054670@SRX7054671@SRX7054671@SRX…
FALSE	chr5	175863710	175863960	FAF2	74	chr5:175863638-175864012@chr5:175863638-175864012@chr5:175863644-175863973@chr5:175863644-175863973@chr5:175863661-175863992@chr5:175863661-175863992@chr5:175863673-175863924@chr5:175863673-175863924@chr5:175863681-175863997@chr5:175863681-175863997@chr5:175863684-175863961@chr5:175863684-175863961@chr5:175863684-175863995@chr5:175863684-175863995@chr5:175863685-175863966@chr5:175863685-175863966…	Cardiovascular@Cardiovascular@Cardiovascular@Cardiovascular@Cardiovascular@Cardiovascular@Cardiovascular@Cardiovascular@Cardiovascular@Cardiovascular@Cardiovascular@Cardiovascular@Cardiovascular@Cardiovascular@Cardiovascular@Cardiovascular@Cardiovascular@Cardiovascular@Cardiovascular@Cardiovascular@Cardiovascular@Cardiovascular@Cardiovascular@Cardiovascular@Cardiovascular@Cardiovascular@Cardiovas…	SRX7054661@SRX7054661@SRX7054666@SRX7054666@SRX7054614@SRX7054614@SRX7054617@SRX7054617@SRX7055006@SRX7055006@SRX7054618@SRX7054618@SRX7055007@SRX7055007@SRX7054621@SRX7054621@SRX7054615@SRX7054615@SRX7054662@SRX7054662@SRX7054619@SRX7054619@SRX7054611@SRX7054611@SRX7054668@SRX7054668@SRX7054616@SRX7054616@SRX7055008@SRX7055008@SRX7055005@SRX7055005@SRX7054670@SRX7054670@SRX7054671@SRX7054671@SRX…
FALSE	chr12	497621	499621	KDM5A	74	chr12:498089-499164@chr12:498164-498868@chr12:498196-498449@chr12:498239-498637@chr12:498277-498990@chr12:498317-498654@chr12:498337-498975@chr12:498344-498781@chr12:498352-498644@chr12:498356-498955@chr12:498358-498937@chr12:498359-498901@chr12:498362-498574@chr12:498379-498582@chr12:498379-498625@chr12:498380-498579@chr12:498382-498571@chr12:498383-498951@chr12:498387-498562@chr12:498388-498623…	Digestive%20tract@Kidney@Blood@Liver@Cardiovascular@Blood@Cardiovascular@Kidney@Blood@Cardiovascular@Cardiovascular@Cardiovascular@Blood@Blood@Blood@Blood@Blood@Cardiovascular@Cardiovascular@Blood@Blood@Cardiovascular@Cardiovascular@Cardiovascular@Cardiovascular@Cardiovascular@Blood@Cardiovascular@Blood@Cardiovascular@Blood@Blood@Lung@Blood@Blood@Blood@Cardiovascular@Cardiovascular@Cardiovascular…	SRX359916@SRX2055843@SRX017911@SRX2270129@SRX7054661@SRX150605@SRX7054666@SRX3636885@SRX150362@SRX2207673@SRX7055007@SRX7054671@SRX150359@SRX150606@SRX150608@SRX150365@SRX017859@SRX2207672@SRX7054664@SRX017913@SRX017912@SRX7054617@SRX7054660@SRX7055006@SRX7054621@SRX7054667@SRX150610@SRX7054614@SRX017891@SRX7054609@SRX2837382@SRX1460848@SRX212183@SRX150557@SRX150361@SRX150353@SRX294971@SRX7054616…
TRUE	chr2	239334468	239336468	ASB1	74	chr2:239335224-239335639@chr2:239335225-239335653@chr2:239335226-239335538@chr2:239335228-239335691@chr2:239335231-239335548@chr2:239335237-239335497@chr2:239335242-239335675@chr2:239335243-239335500@chr2:239335245-239335614@chr2:239335247-239335544@chr2:239335252-239335559@chr2:239335252-239335792@chr2:239335258-239335446@chr2:239335259-239335623@chr2:239335260-239335511@chr2:239335261-239335611…	Others@Cardiovascular@Cardiovascular@Cardiovascular@Cardiovascular@Blood@Cardiovascular@Cardiovascular@Others@Cardiovascular@Blood@Cardiovascular@Cardiovascular@Cardiovascular@Others@Cardiovascular@Others@Cardiovascular@Cardiovascular@Cardiovascular@Blood@Cardiovascular@Cardiovascular@Adipocyte@Cardiovascular@Cardiovascular@Cardiovascular@Cardiovascular@Cardiovascular@Cardiovascular@Blood@Cardiov…	SRX5938177@SRX2207673@SRX7054666@SRX2207672@SRX7054664@SRX017911@SRX7055007@SRX2355079@SRX2404136@SRX4947721@SRX150605@SRX7054614@SRX7055004@SRX7054657@SRX2404137@SRX7054663@SRX2404140@SRX2355085@SRX2355081@SRX7054615@SRX1460847@SRX7054622@SRX7054619@SRX813774@SRX7055008@SRX7054616@SRX7054662@SRX2355083@SRX7054618@SRX7054672@SRX017912@SRX7054670@SRX7054661@SRX2355078@SRX7054671@SRX017913@SRX70550…
FALSE	chr19	48248646	48248896	SELENOW	73	chr19:48248575-48249009@chr19:48248587-48248913@chr19:48248590-48249004@chr19:48248611-48248977@chr19:48248611-48249018@chr19:48248613-48248998@chr19:48248615-48249033@chr19:48248616-48248808@chr19:48248622-48248999@chr19:48248624-48248970@chr19:48248625-48249017@chr19:48248627-48248990@chr19:48248628-48249050@chr19:48248632-48249013@chr19:48248633-48248959@chr19:48248633-48249002@chr19:48248634-…	Cardiovascular@Blood@Blood@Cardiovascular@Kidney@Cardiovascular@Cardiovascular@Blood@Cardiovascular@Blood@Cardiovascular@Cardiovascular@Cardiovascular@Cardiovascular@Blood@Blood@Cardiovascular@Digestive%20tract@Cardiovascular@Blood@Cardiovascular@Blood@Blood@Blood@Blood@Cardiovascular@Cardiovascular@Blood@Cardiovascular@Cardiovascular@Blood@Cardiovascular@Cardiovascular@Blood@Cardiovascular@Cardi…	SRX2355079@SRX017913@SRX150605@SRX2355085@SRX2055843@SRX7054670@SRX7054661@SRX150359@SRX7054618@SRX150353@SRX2355083@SRX7054662@SRX7054611@SRX7054614@SRX150557@SRX150606@SRX2355081@SRX359916@SRX7054668@SRX150608@SRX2207672@SRX150362@SRX150610@SRX017912@SRX2837382@SRX7054671@SRX7054666@SRX150365@SRX7054615@SRX7054616@SRX017907@SRX7055006@SRX7055007@SRX017871@SRX7054621@SRX2207673@SRX017891@SRX1503…
FALSE	chr19	45959026	45959276	ERCC2	73	chr19:45958943-45959524@chr19:45958964-45959741@chr19:45958969-45959452@chr19:45958971-45959698@chr19:45958974-45959744@chr19:45958977-45959417@chr19:45958977-45959436@chr19:45958979-45959421@chr19:45958981-45959472@chr19:45958983-45959457@chr19:45958983-45959471@chr19:45958986-45959437@chr19:45958987-45959357@chr19:45958992-45959517@chr19:45958994-45959420@chr19:45958995-45959479@chr19:45958995-…	Cardiovascular@Cardiovascular@Cardiovascular@Cardiovascular@Cardiovascular@Cardiovascular@Cardiovascular@Cardiovascular@Cardiovascular@Cardiovascular@Cardiovascular@Cardiovascular@Cardiovascular@Cardiovascular@Others@Cardiovascular@Cardiovascular@Cardiovascular@Cardiovascular@Cardiovascular@Cardiovascular@Cardiovascular@Cardiovascular@Cardiovascular@Cardiovascular@Cardiovascular@Cardiovascular@Ca…	SRX7054661@SRX2207672@SRX7054619@SRX7054618@SRX2207673@SRX7054614@SRX2355083@SRX2355079@SRX7054670@SRX7054666@SRX7054611@SRX7055006@SRX7054613@SRX2355085@SRX5938177@SRX7054671@SRX7054657@SRX7054658@SRX7054662@SRX7054668@SRX7054617@SRX7054664@SRX7054667@SRX7055007@SRX7054616@SRX2355081@SRX2207671@SRX7054615@SRX2404132@SRX7054622@SRX7054610@SRX7055004@SRX4947720@SRX7054621@SRX112016@SRX7054623@SRX4…
FALSE	chr3	131220660	131222660	MRPL3	72	chr3:131221356-131222025@chr3:131221519-131221801@chr3:131221523-131221799@chr3:131221557-131221980@chr3:131221565-131221827@chr3:131221573-131221958@chr3:131221573-131221978@chr3:131221584-131221953@chr3:131221592-131221945@chr3:131221593-131222294@chr3:131221605-131221932@chr3:131221608-131221958@chr3:131221608-131222279@chr3:131221616-131221997@chr3:131221619-131221902@chr3:131221621-131221845…	Digestive%20tract@Breast@Cardiovascular@Kidney@Cardiovascular@Cardiovascular@Cardiovascular@Cardiovascular@Liver@Cardiovascular@Cardiovascular@Cardiovascular@Cardiovascular@Blood@Cardiovascular@Cardiovascular@Blood@Cardiovascular@Blood@Cardiovascular@Blood@Blood@Cardiovascular@Blood@Cardiovascular@Cardiovascular@Cardiovascular@Blood@Blood@Cardiovascular@Cardiovascular@Blood@Cardiovascular@Cardiov…	SRX359916@SRX968976@SRX4947721@SRX2055843@SRX2355081@SRX2207673@SRX2207672@SRX7054657@SRX2270129@SRX7055007@SRX7054614@SRX7054617@SRX7054671@SRX150608@SRX7054664@SRX2355085@SRX1460848@SRX7054665@SRX017897@SRX7055004@SRX150605@SRX150610@SRX7054661@SRX4401064@SRX7055006@SRX7054619@SRX7054663@SRX017913@SRX2837382@SRX7054666@SRX7054611@SRX017859@SRX7054618@SRX7054667@SRX7054615@SRX150359@SRX017879@SR…
TRUE	chr2	26256028	26258028	RAB10	71	chr2:26256577-26257100@chr2:26256632-26257117@chr2:26256658-26257325@chr2:26256663-26256777@chr2:26256665-26257139@chr2:26256670-26257152@chr2:26256676-26257075@chr2:26256677-26257288@chr2:26256680-26256896@chr2:26256681-26257171@chr2:26256685-26257002@chr2:26256685-26257029@chr2:26256685-26257144@chr2:26256687-26257135@chr2:26256688-26257018@chr2:26256688-26257127@chr2:26256691-26257007@chr2:262…	Cardiovascular@Cardiovascular@Digestive%20tract@Uterus@Cardiovascular@Cardiovascular@Cardiovascular@Cardiovascular@Cardiovascular@Cardiovascular@Cardiovascular@Cardiovascular@Cardiovascular@Cardiovascular@Cardiovascular@Cardiovascular@Uterus@Cardiovascular@Cardiovascular@Cardiovascular@Blood@Cardiovascular@Cardiovascular@Cardiovascular@Cardiovascular@Cardiovascular@Cardiovascular@Cardiovascular@C…	SRX7054671@SRX2355078@SRX359916@SRX378804@SRX2355085@SRX7054666@SRX7054668@SRX2355079@SRX7054620@SRX7054661@SRX7054670@SRX7054672@SRX7054614@SRX7054616@SRX2355081@SRX7054664@SRX378805@SRX7055006@SRX7054611@SRX7055007@SRX1460848@SRX7054622@SRX7054615@SRX7055008@SRX7054657@SRX7054667@SRX2355083@SRX7054619@SRX7054659@SRX7054621@SRX7055004@SRX7054610@SRX7054618@SRX7054617@SRX7054665@SRX4947721@SRX400…
TRUE	chr2	54196527	54198527	PSME4	70	chr2:54196443-54196679@chr2:54196445-54196647@chr2:54196450-54196669@chr2:54196460-54196662@chr2:54196462-54196653@chr2:54196464-54196689@chr2:54196465-54196664@chr2:54196468-54196745@chr2:54196472-54196678@chr2:54196472-54196745@chr2:54196476-54196786@chr2:54196478-54196668@chr2:54196481-54196677@chr2:54196485-54196699@chr2:54196490-54196689@chr2:54196496-54196692@chr2:54196500-54196661@chr2:541…	Cardiovascular@Cardiovascular@Cardiovascular@Cardiovascular@Cardiovascular@Cardiovascular@Cardiovascular@Others@Cardiovascular@Cardiovascular@Cardiovascular@Cardiovascular@Cardiovascular@Cardiovascular@Cardiovascular@Cardiovascular@Cardiovascular@Cardiovascular@Cardiovascular@Cardiovascular@Cardiovascular@Cardiovascular@Cardiovascular@Adipocyte@Cardiovascular@Cardiovascular@Kidney@Liver@Kidney@Bo…	SRX7054619@SRX7054670@SRX7054661@SRX7055006@SRX7054666@SRX7055007@SRX7054663@SRX5938177@SRX7054622@SRX2207673@SRX2207672@SRX7054617@SRX7054662@SRX7054614@SRX7054621@SRX7054618@SRX7054671@SRX7055008@SRX7054611@SRX7054615@SRX7054657@SRX7054659@SRX7054609@SRX813774@SRX2207672@SRX2207673@SRX3346352@SRX2270129@SRX2055843@SRX3638909@SRX3638907@SRX2355078@SRX7054671@SRX7054614@SRX3638911@SRX7054665@SRX1…
FALSE	chr10	102295140	102297140	HIF1AN	70	chr10:102295359-102296008@chr10:102295403-102295837@chr10:102295406-102295700@chr10:102295433-102295741@chr10:102295436-102295663@chr10:102295437-102295869@chr10:102295437-102295920@chr10:102295459-102295817@chr10:102295461-102295754@chr10:102295474-102295769@chr10:102295481-102295639@chr10:102295481-102296042@chr10:102295485-102295708@chr10:102295486-102295759@chr10:102295486-102295817@chr10:102…	Digestive%20tract@Blood@Blood@Others@Blood@Blood@Cardiovascular@Cardiovascular@Blood@Blood@Lung@Cardiovascular@Blood@Blood@Cardiovascular@Cardiovascular@Cardiovascular@Cardiovascular@Cardiovascular@Cardiovascular@Cardiovascular@Blood@Cardiovascular@Cardiovascular@Cardiovascular@Cardiovascular@Cardiovascular@Blood@Cardiovascular@Blood@Blood@Cardiovascular@Cardiovascular@Cardiovascular@Blood@Cardio…	SRX359916@SRX150557@SRX150353@SRX5938177@SRX017871@SRX150605@SRX7055007@SRX7054621@SRX017913@SRX017912@SRX212183@SRX2207672@SRX150610@SRX150608@SRX2355085@SRX7054622@SRX425264@SRX7054615@SRX7054618@SRX7054671@SRX2207673@SRX150362@SRX7054610@SRX7054614@SRX7054666@SRX7054617@SRX7054661@SRX150359@SRX7054664@SRX1460848@SRX150606@SRX7055004@SRX7054668@SRX7054657@SRX017895@SRX2355078@SRX425263@SRX31025…
FALSE	chr17	2296053	2296303	TSR1	68	chr17:2295973-2296851@chr17:2295973-2296851@chr17:2295984-2296799@chr17:2295984-2296799@chr17:2295990-2296461@chr17:2295990-2296461@chr17:2295998-2296257@chr17:2295998-2296257@chr17:2296001-2296428@chr17:2296001-2296428@chr17:2296011-2296843@chr17:2296011-2296843@chr17:2296071-2296692@chr17:2296071-2296692@chr17:2296075-2296758@chr17:2296075-2296758@chr17:2296095-2296782@chr17:2296095-2296782@chr…	Cardiovascular@Cardiovascular@Cardiovascular@Cardiovascular@Kidney@Kidney@Cardiovascular@Cardiovascular@Cardiovascular@Cardiovascular@Cardiovascular@Cardiovascular@Cardiovascular@Cardiovascular@Cardiovascular@Cardiovascular@Cardiovascular@Cardiovascular@Cardiovascular@Cardiovascular@Cardiovascular@Cardiovascular@Cardiovascular@Cardiovascular@Cardiovascular@Cardiovascular@Cardiovascular@Cardiovasc…	SRX2355085@SRX2355085@SRX2207672@SRX2207672@SRX3346352@SRX3346352@SRX2355081@SRX2355081@SRX2355078@SRX2355078@SRX2207673@SRX2207673@SRX7054662@SRX7054662@SRX2355079@SRX2355079@SRX7054619@SRX7054619@SRX7054618@SRX7054618@SRX7054667@SRX7054667@SRX7054659@SRX7054659@SRX7054614@SRX7054614@SRX7054671@SRX7054671@SRX1460848@SRX1460848@SRX7054664@SRX7054664@SRX7054616@SRX7054616@SRX7054666@SRX7054666@SRX…
TRUE	chr15	60663575	60663825	ANXA2	68	chr15:60663382-60663950@chr15:60663434-60663845@chr15:60663436-60663972@chr15:60663448-60663893@chr15:60663481-60663890@chr15:60663486-60663870@chr15:60663495-60664024@chr15:60663505-60663795@chr15:60663511-60663792@chr15:60663517-60663804@chr15:60663519-60663909@chr15:60663520-60663983@chr15:60663532-60663852@chr15:60663535-60663894@chr15:60663535-60663902@chr15:60663536-60663910@chr15:60663540-…	Cardiovascular@Lung@Cardiovascular@Others@Lung@Lung@Digestive%20tract@Kidney@Uterus@Kidney@Cardiovascular@Others@Cardiovascular@Cardiovascular@Cardiovascular@Cardiovascular@Cardiovascular@Lung@Cardiovascular@Cardiovascular@Cardiovascular@Cardiovascular@Cardiovascular@Cardiovascular@Cardiovascular@Uterus@Cardiovascular@Others@Bone@Cardiovascular@Cardiovascular@Others@Others@Cardiovascular@Cardiova…	SRX2207672@SRX212183@SRX2207673@SRX5938177@SRX1672133@SRX1672130@SRX3102571@SRX2055843@SRX027912@SRX3636885@SRX7054617@SRX2404132@SRX2355079@SRX7055007@SRX7054666@SRX7054661@SRX7054618@SRX1672129@SRX7054664@SRX7054671@SRX7054619@SRX2355085@SRX7054615@SRX7054663@SRX7055006@SRX027913@SRX7054670@SRX2404135@SRX3638908@SRX7054610@SRX7054614@SRX2404140@SRX2404133@SRX7054621@SRX7054657@SRX7055008@SRX705…
TRUE	chr12	69181196	69181446	MDM2	68	chr12:69181078-69181585@chr12:69181097-69181613@chr12:69181097-69181617@chr12:69181099-69181596@chr12:69181103-69181582@chr12:69181104-69181577@chr12:69181105-69181561@chr12:69181110-69181618@chr12:69181113-69181606@chr12:69181114-69181569@chr12:69181118-69181556@chr12:69181118-69181602@chr12:69181120-69181580@chr12:69181127-69181582@chr12:69181127-69181588@chr12:69181128-69181579@chr12:69181129-…	Cardiovascular@Cardiovascular@Others@Cardiovascular@Cardiovascular@Cardiovascular@Cardiovascular@Cardiovascular@Cardiovascular@Cardiovascular@Cardiovascular@Cardiovascular@Cardiovascular@Cardiovascular@Cardiovascular@Cardiovascular@Cardiovascular@Cardiovascular@Cardiovascular@Cardiovascular@Cardiovascular@Cardiovascular@Cardiovascular@Cardiovascular@Cardiovascular@Cardiovascular@Cardiovascular@Ca…	SRX7054661@SRX2207673@SRX5938177@SRX7054614@SRX7054666@SRX7055006@SRX7054621@SRX2207672@SRX7054611@SRX7054617@SRX7054615@SRX7054670@SRX7054664@SRX7054616@SRX7055007@SRX7054671@SRX7054662@SRX2355083@SRX7054665@SRX425264@SRX7054622@SRX7054668@SRX7054663@SRX425263@SRX7055005@SRX7055004@SRX7054618@SRX7054657@SRX7054619@SRX2355081@SRX2404135@SRX2355079@SRX7054610@SRX2404140@SRX7055008@SRX7054667@SRX21…
FALSE	chr17	2296053	2296303	SGSM2	68	chr17:2295973-2296851@chr17:2295973-2296851@chr17:2295984-2296799@chr17:2295984-2296799@chr17:2295990-2296461@chr17:2295990-2296461@chr17:2295998-2296257@chr17:2295998-2296257@chr17:2296001-2296428@chr17:2296001-2296428@chr17:2296011-2296843@chr17:2296011-2296843@chr17:2296071-2296692@chr17:2296071-2296692@chr17:2296075-2296758@chr17:2296075-2296758@chr17:2296095-2296782@chr17:2296095-2296782@chr…	Cardiovascular@Cardiovascular@Cardiovascular@Cardiovascular@Kidney@Kidney@Cardiovascular@Cardiovascular@Cardiovascular@Cardiovascular@Cardiovascular@Cardiovascular@Cardiovascular@Cardiovascular@Cardiovascular@Cardiovascular@Cardiovascular@Cardiovascular@Cardiovascular@Cardiovascular@Cardiovascular@Cardiovascular@Cardiovascular@Cardiovascular@Cardiovascular@Cardiovascular@Cardiovascular@Cardiovasc…	SRX2355085@SRX2355085@SRX2207672@SRX2207672@SRX3346352@SRX3346352@SRX2355081@SRX2355081@SRX2355078@SRX2355078@SRX2207673@SRX2207673@SRX7054662@SRX7054662@SRX2355079@SRX2355079@SRX7054619@SRX7054619@SRX7054618@SRX7054618@SRX7054667@SRX7054667@SRX7054659@SRX7054659@SRX7054614@SRX7054614@SRX7054671@SRX7054671@SRX1460848@SRX1460848@SRX7054664@SRX7054664@SRX7054616@SRX7054616@SRX7054666@SRX7054666@SRX…
TRUE	chr1	179922857	179924857	CEP350	68	chr1:179923347-179924287@chr1:179923527-179924009@chr1:179923538-179924041@chr1:179923541-179924013@chr1:179923555-179924005@chr1:179923595-179924061@chr1:179923605-179923960@chr1:179923611-179924032@chr1:179923614-179923991@chr1:179923621-179924096@chr1:179923630-179923966@chr1:179923637-179923955@chr1:179923637-179924123@chr1:179923642-179923946@chr1:179923642-179923979@chr1:179923665-179923964…	Digestive%20tract@Cardiovascular@Cardiovascular@Others@Cardiovascular@Cardiovascular@Cardiovascular@Cardiovascular@Cardiovascular@Cardiovascular@Cardiovascular@Cardiovascular@Blood@Cardiovascular@Cardiovascular@Cardiovascular@Cardiovascular@Cardiovascular@Blood@Cardiovascular@Cardiovascular@Blood@Cardiovascular@Cardiovascular@Blood@Blood@Kidney@Cardiovascular@Cardiovascular@Cardiovascular@Cardiov…	SRX359916@SRX7054661@SRX7054666@SRX5938177@SRX7054618@SRX7055006@SRX2207672@SRX7054614@SRX7054611@SRX7054615@SRX7054617@SRX7054657@SRX150605@SRX2207673@SRX2355078@SRX7054668@SRX7055004@SRX7054670@SRX017912@SRX7054662@SRX7054671@SRX150610@SRX7054664@SRX7054616@SRX150353@SRX150606@SRX3636885@SRX2355085@SRX7054621@SRX7055008@SRX7054609@SRX150359@SRX7054619@SRX017913@SRX150608@SRX150361@SRX7054622@SR…
TRUE	chr8	125550092	125552092	NDUFB9	68	chr8:125550651-125550822@chr8:125550889-125551768@chr8:125551088-125551478@chr8:125551103-125551376@chr8:125551134-125551488@chr8:125551137-125551381@chr8:125551137-125551443@chr8:125551138-125551286@chr8:125551147-125551544@chr8:125551148-125551529@chr8:125551150-125551527@chr8:125551154-125551537@chr8:125551169-125551608@chr8:125551172-125551587@chr8:125551176-125551560@chr8:125551176-125551563…	Cardiovascular@Digestive%20tract@Kidney@Breast@Others@Blood@Cardiovascular@Bone@Cardiovascular@Cardiovascular@Blood@Cardiovascular@Blood@Cardiovascular@Blood@Cardiovascular@Cardiovascular@Cardiovascular@Kidney@Cardiovascular@Cardiovascular@Cardiovascular@Cardiovascular@Cardiovascular@Cardiovascular@Blood@Cardiovascular@Bone@Cardiovascular@Blood@Cardiovascular@Blood@Cardiovascular@Blood@Cardiovasc…	SRX2207672@SRX359916@SRX3636885@SRX968971@SRX5938177@SRX150557@SRX7054617@SRX3638911@SRX2207673@SRX7054671@SRX150608@SRX2207672@SRX150605@SRX7054611@SRX150353@SRX7054661@SRX7054622@SRX7054666@SRX2055843@SRX7055006@SRX2355079@SRX7054614@SRX7054618@SRX7054668@SRX7054616@SRX150365@SRX7054667@SRX3638907@SRX7055008@SRX017912@SRX2355085@SRX017872@SRX7054615@SRX1460848@SRX7054612@SRX7054662@SRX7054619@S…
TRUE	chr19	18439288	18439538	GDF15	66	chr19:18439244-18439539@chr19:18439250-18439648@chr19:18439252-18439688@chr19:18439257-18439397@chr19:18439260-18439368@chr19:18439264-18439609@chr19:18439264-18439727@chr19:18439267-18439689@chr19:18439268-18439563@chr19:18439271-18439486@chr19:18439271-18439708@chr19:18439274-18439621@chr19:18439276-18439567@chr19:18439276-18439661@chr19:18439282-18439614@chr19:18439285-18439672@chr19:18439288-…	Blood@Cardiovascular@Blood@Blood@Blood@Blood@Cardiovascular@Cardiovascular@Others@Blood@Cardiovascular@Cardiovascular@Cardiovascular@Cardiovascular@Cardiovascular@Cardiovascular@Cardiovascular@Cardiovascular@Blood@Blood@Cardiovascular@Others@Others@Cardiovascular@Cardiovascular@Cardiovascular@Cardiovascular@Cardiovascular@Cardiovascular@Cardiovascular@Cardiovascular@Cardiovascular@Cardiovascular@…	SRX150610@SRX2355085@SRX150605@SRX150557@SRX150608@SRX150353@SRX2207672@SRX7054661@SRX2404140@SRX1460848@SRX2207673@SRX7055007@SRX7054662@SRX7054618@SRX7054668@SRX7054666@SRX7054611@SRX7055006@SRX2837382@SRX017912@SRX7054617@SRX2404134@SRX5938177@SRX7054670@SRX7055004@SRX7054614@SRX2355079@SRX2355081@SRX7054616@SRX7054619@SRX7054663@SRX2355078@SRX7054621@SRX7054622@SRX7054671@SRX7054657@SRX705466…
FALSE	chr19	19625668	19627668	NDUFA13	66	chr19:19626558-19627287@chr19:19626785-19627190@chr19:19626802-19627303@chr19:19626817-19627060@chr19:19626821-19627086@chr19:19626831-19627231@chr19:19626835-19627131@chr19:19626839-19627189@chr19:19626840-19627237@chr19:19626846-19627073@chr19:19626848-19627156@chr19:19626854-19627069@chr19:19626858-19627080@chr19:19626861-19627266@chr19:19626862-19627194@chr19:19626862-19627249@chr19:19626863-…	Digestive%20tract@Blood@Cardiovascular@Kidney@Blood@Cardiovascular@Blood@Cardiovascular@Cardiovascular@Blood@Cardiovascular@Others@Blood@Cardiovascular@Cardiovascular@Cardiovascular@Cardiovascular@Cardiovascular@Cardiovascular@Cardiovascular@Blood@Cardiovascular@Blood@Blood@Cardiovascular@Blood@Blood@Cardiovascular@Cardiovascular@Blood@Cardiovascular@Cardiovascular@Blood@Cardiovascular@Cardiovasc…	SRX359916@SRX150605@SRX7054661@SRX3346352@SRX2837382@SRX7054615@SRX150362@SRX7054671@SRX7054670@SRX150610@SRX2207673@SRX5938177@SRX150359@SRX7054614@SRX7054662@SRX7054666@SRX7054657@SRX2355079@SRX7054668@SRX7054622@SRX150557@SRX2207672@SRX017912@SRX017895@SRX2355085@SRX017897@SRX150365@SRX7055005@SRX7055006@SRX150353@SRX7054611@SRX7054667@SRX017859@SRX7054618@SRX7054619@SRX7054616@SRX017882@SRX14…
TRUE	chr19	59010694	59010944	UBE2M	65	chr19:59010569-59011022@chr19:59010579-59011011@chr19:59010590-59010953@chr19:59010591-59010959@chr19:59010593-59011072@chr19:59010608-59011011@chr19:59010608-59011074@chr19:59010609-59011041@chr19:59010618-59011035@chr19:59010621-59010934@chr19:59010621-59011016@chr19:59010621-59011130@chr19:59010623-59010928@chr19:59010627-59011015@chr19:59010630-59010984@chr19:59010642-59011023@chr19:59010644-…	Cardiovascular@Cardiovascular@Cardiovascular@Cardiovascular@Cardiovascular@Cardiovascular@Cardiovascular@Cardiovascular@Cardiovascular@Cardiovascular@Cardiovascular@Cardiovascular@Cardiovascular@Cardiovascular@Cardiovascular@Cardiovascular@Cardiovascular@Cardiovascular@Cardiovascular@Cardiovascular@Cardiovascular@Cardiovascular@Cardiovascular@Cardiovascular@Cardiovascular@Cardiovascular@Cardiovas…	SRX2355078@SRX7054618@SRX7054670@SRX2355085@SRX7054661@SRX7054621@SRX7054671@SRX2355079@SRX7054622@SRX7054667@SRX7055006@SRX7054611@SRX2355081@SRX7054666@SRX7054662@SRX7054614@SRX2207672@SRX2355083@SRX7054668@SRX7054664@SRX7054619@SRX7055008@SRX7055007@SRX7054615@SRX7054616@SRX7054663@SRX2207673@SRX7054657@SRX1460847@SRX7054617@SRX7054623@SRX7054612@SRX7054669@SRX359916@SRX7054624@SRX7054672@SRX7…
TRUE	chr14	21944284	21946284	TOX4	65	chr14:21944620-21944859@chr14:21944642-21944843@chr14:21944695-21945060@chr14:21944699-21945004@chr14:21944712-21945029@chr14:21944726-21945045@chr14:21944750-21944938@chr14:21944767-21944921@chr14:21944779-21945055@chr14:21944874-21945418@chr14:21944881-21945067@chr14:21944904-21945504@chr14:21945001-21945357@chr14:21945060-21945272@chr14:21945083-21945445@chr14:21945086-21945426@chr14:21945088-…	Cardiovascular@Cardiovascular@Cardiovascular@Cardiovascular@Cardiovascular@Cardiovascular@Cardiovascular@Cardiovascular@Cardiovascular@Cardiovascular@Cardiovascular@Kidney@Cardiovascular@Cardiovascular@Cardiovascular@Cardiovascular@Cardiovascular@Cardiovascular@Cardiovascular@Cardiovascular@Digestive%20tract@Cardiovascular@Cardiovascular@Cardiovascular@Cardiovascular@Cardiovascular@Liver@Cardiova…	SRX2207672@SRX2207673@SRX7054661@SRX7055006@SRX7055007@SRX7054614@SRX7054619@SRX2355085@SRX7054621@SRX7054671@SRX7054666@SRX2055843@SRX2355079@SRX2355083@SRX7054615@SRX7054616@SRX7055007@SRX425263@SRX7054657@SRX2355078@SRX359916@SRX7054617@SRX2355085@SRX7054666@SRX7054614@SRX425264@SRX2270129@SRX2355081@SRX150605@SRX3636885@SRX7054661@SRX2207673@SRX7054667@SRX7054611@SRX2207672@SRX7054664@SRX7054…
TRUE	chr11	61655632	61655882	BEST1	64	chr11:61655446-61655708@chr11:61655486-61655859@chr11:61655495-61655880@chr11:61655505-61655900@chr11:61655507-61655869@chr11:61655509-61655819@chr11:61655510-61655912@chr11:61655513-61655845@chr11:61655514-61655803@chr11:61655514-61655867@chr11:61655515-61655830@chr11:61655516-61655832@chr11:61655517-61655950@chr11:61655518-61655791@chr11:61655519-61655801@chr11:61655520-61655886@chr11:61655521-…	Adipocyte@Cardiovascular@Cardiovascular@Cardiovascular@Cardiovascular@Cardiovascular@Cardiovascular@Cardiovascular@Cardiovascular@Cardiovascular@Cardiovascular@Cardiovascular@Cardiovascular@Cardiovascular@Cardiovascular@Others@Cardiovascular@Cardiovascular@Cardiovascular@Cardiovascular@Cardiovascular@Cardiovascular@Cardiovascular@Cardiovascular@Cardiovascular@Cardiovascular@Cardiovascular@Cardiov…	SRX813773@SRX7054671@SRX7054611@SRX2207672@SRX7054666@SRX7054618@SRX2207673@SRX7054616@SRX7055006@SRX7054617@SRX7054670@SRX7054668@SRX7054661@SRX7054662@SRX2355085@SRX5938177@SRX7054615@SRX7054612@SRX7054614@SRX7054657@SRX4947721@SRX7055005@SRX7055007@SRX2355079@SRX4947720@SRX7055004@SRX112016@SRX2355081@SRX7054664@SRX7054623@SRX7054619@SRX2355083@SRX7054621@SRX2355078@SRX2207671@SRX7054610@SRX70…
TRUE	chr12	95396089	95398089	NDUFA12	64	chr12:95397121-95397831@chr12:95397229-95397838@chr12:95397236-95397687@chr12:95397248-95397719@chr12:95397269-95397626@chr12:95397291-95397730@chr12:95397296-95397635@chr12:95397310-95397638@chr12:95397311-95397596@chr12:95397316-95397607@chr12:95397323-95397571@chr12:95397324-95397576@chr12:95397327-95397569@chr12:95397330-95397551@chr12:95397335-95397792@chr12:95397337-95397573@chr12:95397345-…	Digestive%20tract@Blood@Kidney@Cardiovascular@Blood@Blood@Kidney@Cardiovascular@Blood@Blood@Blood@Blood@Liver@Blood@Blood@Blood@Blood@Blood@Cardiovascular@Liver@Cardiovascular@Cardiovascular@Cardiovascular@Blood@Cardiovascular@Cardiovascular@Blood@Blood@Blood@Cardiovascular@Cardiovascular@Cardiovascular@Blood@Cardiovascular@Cardiovascular@Cardiovascular@Cardiovascular@Cardiovascular@Cardiovascula…	SRX359916@SRX150605@SRX2055843@SRX7054661@SRX150362@SRX150608@SRX3636885@SRX7054615@SRX017913@SRX150610@SRX017897@SRX017878@SRX2270129@SRX150365@SRX017912@SRX150557@SRX150606@SRX017895@SRX7054621@SRX2270128@SRX7054671@SRX7055007@SRX7054667@SRX150359@SRX7054617@SRX7055006@SRX017887@SRX017906@SRX150353@SRX7054657@SRX7054614@SRX7054611@SRX017891@SRX7054616@SRX2207672@SRX7054664@SRX7055004@SRX7054618…
FALSE	chr6	3068227	3070227	HSPA1A	62	chr6:3068468-3068757@chr6:3068488-3068736@chr6:3068489-3069319@chr6:3068492-3068702@chr6:3068500-3068677@chr6:3068513-3068714@chr6:3068531-3068715@chr6:3068537-3068733@chr6:3068554-3068717@chr6:3068685-3068847@chr6:3068702-3068857@chr6:3068728-3068924@chr6:3068840-3069252@chr6:3068933-3069426@chr6:3068934-3069243@chr6:3068939-3069335@chr6:3068951-3069188@chr6:3068954-3069264@chr6:3068980-3069281@…	Cardiovascular@Cardiovascular@Cardiovascular@Cardiovascular@Cardiovascular@Cardiovascular@Cardiovascular@Cardiovascular@Cardiovascular@Blood@Cardiovascular@Bone@Cardiovascular@Blood@Cardiovascular@Cardiovascular@Cardiovascular@Kidney@Cardiovascular@Cardiovascular@Cardiovascular@Cardiovascular@Cardiovascular@Cardiovascular@Cardiovascular@Cardiovascular@Cardiovascular@Bone@Cardiovascular@Cardiovasc…	SRX2207672@SRX7054666@SRX7054614@SRX7055007@SRX7055008@SRX7054622@SRX7055004@SRX7054671@SRX7054621@SRX1460848@SRX2355078@SRX3638907@SRX2355079@SRX150605@SRX7054611@SRX7054671@SRX7054665@SRX2055843@SRX7055006@SRX7054617@SRX7054615@SRX7054666@SRX7054663@SRX2355083@SRX7055007@SRX7054661@SRX7054670@SRX3638907@SRX7055008@SRX7054658@SRX1460848@SRX2355085@SRX2207673@SRX7054619@SRX2207672@SRX150608@SRX01…
TRUE	chr9	4661543	4663543	PLPP6	60	chr9:4661949-4662453@chr9:4662037-4662381@chr9:4662056-4662414@chr9:4662061-4662343@chr9:4662064-4662402@chr9:4662076-4662440@chr9:4662077-4662390@chr9:4662079-4662357@chr9:4662079-4662386@chr9:4662085-4662325@chr9:4662086-4662379@chr9:4662087-4662385@chr9:4662087-4662387@chr9:4662090-4662393@chr9:4662090-4662446@chr9:4662090-4662452@chr9:4662093-4662362@chr9:4662098-4662286@chr9:4662101-4662276@…	Others@Blood@Cardiovascular@Lung@Cardiovascular@Kidney@Others@Others@Others@Adipocyte@Others@Cardiovascular@Cardiovascular@Cardiovascular@Cardiovascular@Cardiovascular@Blood@Uterus@Breast@Kidney@Breast@Breast@Blood@Cardiovascular@Cardiovascular@Breast@Cardiovascular@Others@Blood@Cardiovascular@Cardiovascular@Blood@Blood@Cardiovascular@Cardiovascular@Uterus@Cardiovascular@Cardiovascular@Blood@Card…	SRX5938177@SRX150605@SRX7055007@SRX212183@SRX2207672@SRX3636885@SRX2404134@SRX2404135@SRX2404140@SRX813774@SRX2404132@SRX7054670@SRX2207673@SRX7054666@SRX7054661@SRX7054614@SRX017912@SRX027913@SRX1100313@SRX2055843@SRX968977@SRX968978@SRX150353@SRX7054663@SRX7054664@SRX968976@SRX7054617@SRX2404141@SRX150610@SRX7055008@SRX7055006@SRX017911@SRX017895@SRX7054619@SRX7055004@SRX4301473@SRX112016@SRX49…
FALSE	chr15	60685284	60685534	ANXA2	59	chr15:60685137-60685722@chr15:60685155-60685624@chr15:60685157-60685647@chr15:60685164-60685628@chr15:60685185-60685685@chr15:60685186-60685583@chr15:60685189-60685679@chr15:60685192-60685495@chr15:60685200-60685543@chr15:60685204-60685556@chr15:60685206-60685670@chr15:60685208-60685655@chr15:60685211-60685453@chr15:60685212-60685626@chr15:60685214-60685620@chr15:60685215-60685519@chr15:60685217-…	Others@Others@Others@Others@Cardiovascular@Others@Cardiovascular@Digestive%20tract@Others@Others@Cardiovascular@Cardiovascular@Others@Cardiovascular@Cardiovascular@Cardiovascular@Others@Cardiovascular@Cardiovascular@Cardiovascular@Cardiovascular@Cardiovascular@Others@Others@Cardiovascular@Lung@Cardiovascular@Cardiovascular@Cardiovascular@Cardiovascular@Cardiovascular@Cardiovascular@Cardiovascular…	SRX5938177@SRX2404140@SRX2404135@SRX2404132@SRX2207672@SRX2404134@SRX2207673@SRX3102571@SRX2404137@SRX2404127@SRX7054661@SRX7055007@SRX2404125@SRX7055008@SRX7054621@SRX425264@SRX2404142@SRX7055004@SRX7054666@SRX7054663@SRX7054662@SRX7054618@SRX2404133@SRX2404139@SRX7054670@SRX212183@SRX7054664@SRX7054671@SRX7054622@SRX7054616@SRX7054615@SRX7054614@SRX7054617@SRX7054623@SRX7054657@SRX968971@SRX705…
TRUE	chr1	114471595	114473595	HIPK1	59	chr1:114471785-114472233@chr1:114471854-114472154@chr1:114471942-114472328@chr1:114471981-114472265@chr1:114471994-114472260@chr1:114471999-114472306@chr1:114472001-114472285@chr1:114472009-114472279@chr1:114472013-114472250@chr1:114472016-114472180@chr1:114472020-114472255@chr1:114472032-114472314@chr1:114472034-114472315@chr1:114472038-114472309@chr1:114472039-114472204@chr1:114472048-114472259…	Digestive%20tract@Blood@Cardiovascular@Cardiovascular@Cardiovascular@Cardiovascular@Blood@Cardiovascular@Blood@Cardiovascular@Cardiovascular@Cardiovascular@Cardiovascular@Cardiovascular@Blood@Cardiovascular@Cardiovascular@Cardiovascular@Cardiovascular@Cardiovascular@Cardiovascular@Breast@Kidney@Cardiovascular@Blood@Kidney@Cardiovascular@Cardiovascular@Cardiovascular@Blood@Blood@Blood@Cardiovascul…	SRX359916@SRX150362@SRX7054614@SRX7055007@SRX7054666@SRX7054671@SRX150608@SRX2207673@SRX150605@SRX7054668@SRX7054661@SRX7055004@SRX7054664@SRX7054619@SRX150365@SRX7054618@SRX2207672@SRX7054621@SRX7055006@SRX7054615@SRX7054622@SRX968976@SRX2055843@SRX7054670@SRX150610@SRX3636885@SRX2355078@SRX7055008@SRX2355085@SRX150606@SRX150353@SRX1460848@SRX7054667@SRX2270129@SRX3346352@SRX3638907@SRX968976@SR…
TRUE	chr3	158361016	158363016	GFM1	59	chr3:158362092-158362573@chr3:158362115-158362472@chr3:158362116-158362384@chr3:158362129-158362578@chr3:158362134-158362333@chr3:158362136-158362354@chr3:158362137-158362353@chr3:158362137-158362377@chr3:158362137-158362670@chr3:158362143-158362378@chr3:158362143-158362430@chr3:158362145-158362493@chr3:158362146-158362674@chr3:158362148-158362420@chr3:158362149-158362512@chr3:158362149-158362625…	Others@Blood@Blood@Cardiovascular@Cardiovascular@Blood@Cardiovascular@Blood@Cardiovascular@Cardiovascular@Blood@Others@Digestive%20tract@Blood@Cardiovascular@Cardiovascular@Blood@Blood@Blood@Blood@Blood@Cardiovascular@Cardiovascular@Cardiovascular@Cardiovascular@Cardiovascular@Blood@Cardiovascular@Cardiovascular@Blood@Cardiovascular@Cardiovascular@Cardiovascular@Cardiovascular@Others@Cardiovascul…	SRX5938177@SRX150605@SRX150557@SRX7054661@SRX7054667@SRX150359@SRX7054622@SRX4001967@SRX2207672@SRX7054609@SRX017912@SRX2404140@SRX359916@SRX150610@SRX7054611@SRX7055007@SRX017859@SRX017895@SRX017871@SRX150353@SRX1460848@SRX7054671@SRX7054657@SRX7054614@SRX7054666@SRX7054615@SRX150606@SRX7054668@SRX7054619@SRX150365@SRX2355079@SRX2207673@SRX2355078@SRX7054670@SRX2404134@SRX7054616@SRX7054621@SRX0…
TRUE	chr12	6421351	6423351	PLEKHG6	58	chr12:6421727-6422426@chr12:6421897-6422378@chr12:6421899-6422353@chr12:6421902-6422357@chr12:6421916-6422374@chr12:6421919-6422305@chr12:6421930-6422343@chr12:6421945-6422165@chr12:6421946-6422307@chr12:6421958-6422360@chr12:6421965-6422340@chr12:6421966-6422301@chr12:6421969-6422361@chr12:6421972-6422345@chr12:6421974-6422348@chr12:6421975-6422343@chr12:6421980-6422324@chr12:6421985-6422277@chr…	Others@Others@Others@Others@Others@Adipocyte@Blood@Blood@Others@Blood@Blood@Blood@Breast@Others@Blood@Blood@Blood@Breast@Blood@Blood@Digestive%20tract@Blood@Blood@Blood@Blood@Others@Blood@Blood@Blood@Blood@Breast@Blood@Others@Blood@Blood@Blood@Blood@Blood@Blood@Blood@Blood@Blood@Blood@Blood@Blood@Lung@Blood@Blood@Blood@Uterus@Blood@Blood@Blood@Blood@Blood@Prostate@Adipocyte@Adipocyte	SRX5938177@SRX2404134@SRX2404137@SRX2404140@SRX2404132@SRX813774@SRX2837382@SRX4401064@SRX2404139@SRX150605@SRX150557@SRX017912@SRX968976@SRX2404135@SRX150610@SRX150353@SRX017913@SRX968978@SRX017906@SRX017871@SRX3102571@SRX017897@SRX150362@SRX150606@SRX017865@SRX2404133@SRX017895@SRX017891@SRX150359@SRX017905@SRX1100313@SRX017870@SRX2404142@SRX150365@SRX017884@SRX017859@SRX150608@SRX017860@SRX017…
TRUE	chr17	1302506	1304506	YWHAE	58	chr17:1303068-1303251@chr17:1303088-1303286@chr17:1303093-1303634@chr17:1303096-1303769@chr17:1303097-1303860@chr17:1303213-1303792@chr17:1303218-1303501@chr17:1303248-1303593@chr17:1303266-1303528@chr17:1303267-1303524@chr17:1303276-1303481@chr17:1303276-1303669@chr17:1303277-1303536@chr17:1303284-1303568@chr17:1303296-1303579@chr17:1303302-1303468@chr17:1303302-1303503@chr17:1303322-1303538@chr…	Cardiovascular@Cardiovascular@Digestive%20tract@Cardiovascular@Cardiovascular@Cardiovascular@Blood@Blood@Blood@Blood@Kidney@Kidney@Blood@Blood@Blood@Blood@Blood@Blood@Liver@Cardiovascular@Blood@Blood@Cardiovascular@Blood@Blood@Blood@Cardiovascular@Cardiovascular@Cardiovascular@Cardiovascular@Cardiovascular@Cardiovascular@Blood@Blood@Cardiovascular@Blood@Cardiovascular@Others@Uterus@Uterus@Others@…	SRX7054615@SRX7054657@SRX359916@SRX7054671@SRX7054666@SRX7054661@SRX017911@SRX150608@SRX017879@SRX150606@SRX3636885@SRX2055843@SRX150557@SRX150605@SRX150365@SRX017906@SRX017878@SRX017883@SRX2270129@SRX2355079@SRX017884@SRX017912@SRX7054622@SRX150362@SRX017891@SRX017877@SRX7054668@SRX7054616@SRX7054615@SRX7054670@SRX7054657@SRX2355085@SRX150361@SRX150610@SRX7054618@SRX150359@SRX2207672@SRX5938177@…
TRUE	chr4	89713628	89713878	NAP1L5	57	chr4:89713604-89714036@chr4:89713604-89714053@chr4:89713624-89713987@chr4:89713632-89714018@chr4:89713639-89713999@chr4:89713641-89713976@chr4:89713644-89714025@chr4:89713648-89713959@chr4:89713649-89713877@chr4:89713649-89714023@chr4:89713653-89713990@chr4:89713662-89713958@chr4:89713664-89713964@chr4:89713667-89713956@chr4:89713668-89714032@chr4:89713679-89713925@chr4:89713680-89713991@chr4:897…	Others@Kidney@Others@Others@Others@Others@Cardiovascular@Others@Blood@Others@Others@Cardiovascular@Others@Lung@Cardiovascular@Cardiovascular@Cardiovascular@Cardiovascular@Cardiovascular@Blood@Cardiovascular@Blood@Cardiovascular@Cardiovascular@Cardiovascular@Others@Cardiovascular@Cardiovascular@Adipocyte@Cardiovascular@Blood@Cardiovascular@Blood@Cardiovascular@Cardiovascular@Cardiovascular@Cardiov…	SRX2404140@SRX3636885@SRX2404141@SRX2404136@SRX2404142@SRX2404132@SRX2207673@SRX2404133@SRX2837382@SRX5938177@SRX2404135@SRX7055007@SRX2404139@SRX212183@SRX2207672@SRX2355085@SRX7054661@SRX7055004@SRX7054663@SRX150605@SRX7054614@SRX4001967@SRX2355079@SRX7054666@SRX7054618@SRX2404134@SRX7054670@SRX7054616@SRX813774@SRX7054662@SRX1460847@SRX7054619@SRX017912@SRX7055005@SRX7054671@SRX7055006@SRX7054…
FALSE	chr19	17530578	17530828	PGLS	57	chr19:17530289-17531178@chr19:17530377-17530963@chr19:17530389-17530866@chr19:17530390-17530888@chr19:17530396-17530970@chr19:17530398-17530921@chr19:17530399-17530885@chr19:17530419-17530932@chr19:17530422-17530943@chr19:17530426-17530650@chr19:17530426-17530913@chr19:17530428-17530991@chr19:17530429-17531044@chr19:17530432-17530926@chr19:17530434-17530865@chr19:17530439-17530899@chr19:17530441-…	Digestive%20tract@Cardiovascular@Cardiovascular@Cardiovascular@Cardiovascular@Cardiovascular@Cardiovascular@Cardiovascular@Cardiovascular@Cardiovascular@Cardiovascular@Cardiovascular@Cardiovascular@Cardiovascular@Blood@Cardiovascular@Cardiovascular@Cardiovascular@Cardiovascular@Cardiovascular@Cardiovascular@Cardiovascular@Cardiovascular@Cardiovascular@Cardiovascular@Cardiovascular@Others@Cardiova…	SRX359916@SRX7054614@SRX2207673@SRX7054611@SRX7054616@SRX7054666@SRX2207672@SRX7054622@SRX7054618@SRX7054660@SRX7054661@SRX7054668@SRX7054671@SRX7054670@SRX150605@SRX2355078@SRX2355085@SRX7055004@SRX7054657@SRX7054615@SRX7054621@SRX7055006@SRX7055007@SRX7054667@SRX2355083@SRX7055008@SRX5938177@SRX7054672@SRX7054619@SRX7054664@SRX2355079@SRX3636885@SRX1460848@SRX017912@SRX425263@SRX7054617@SRX7054…
FALSE	chr12	57914322	57914572	PIP4K2C	57	chr12:57913910-57914627@chr12:57914051-57914338@chr12:57914094-57914741@chr12:57914111-57914353@chr12:57914118-57914345@chr12:57914124-57914361@chr12:57914135-57914333@chr12:57914140-57914414@chr12:57914148-57914380@chr12:57914148-57914688@chr12:57914156-57914381@chr12:57914160-57914353@chr12:57914170-57914337@chr12:57914175-57914326@chr12:57914176-57914627@chr12:57914178-57914337@chr12:57914182-…	Digestive%20tract@Bone@Cardiovascular@Bone@Blood@Blood@Blood@Blood@Blood@Cardiovascular@Blood@Blood@Blood@Bone@Cardiovascular@Blood@Cardiovascular@Cardiovascular@Cardiovascular@Cardiovascular@Cardiovascular@Blood@Blood@Blood@Cardiovascular@Blood@Cardiovascular@Cardiovascular@Cardiovascular@Cardiovascular@Cardiovascular@Cardiovascular@Cardiovascular@Cardiovascular@Cardiovascular@Cardiovascular@Car…	SRX359916@SRX3638908@SRX7054661@SRX3638907@SRX150362@SRX150557@SRX017913@SRX150605@SRX017891@SRX7054614@SRX150606@SRX150608@SRX150365@SRX3638909@SRX7055006@SRX017887@SRX7054657@SRX7054666@SRX7054621@SRX7054668@SRX7054611@SRX017872@SRX150353@SRX017912@SRX7054615@SRX150610@SRX7054616@SRX7054664@SRX7054671@SRX2355079@SRX7055004@SRX7054617@SRX7054618@SRX7054662@SRX7054665@SRX7054659@SRX7054622@SRX705…
FALSE	chr17	54864466	54864716	DGKE	57	chr17:54864359-54864809@chr17:54864366-54864811@chr17:54864372-54864763@chr17:54864373-54864758@chr17:54864380-54864732@chr17:54864388-54864733@chr17:54864388-54864739@chr17:54864393-54864715@chr17:54864395-54864708@chr17:54864396-54864787@chr17:54864398-54864721@chr17:54864399-54864662@chr17:54864400-54864713@chr17:54864403-54864736@chr17:54864407-54864659@chr17:54864408-54864748@chr17:54864409-…	Lung@Others@Lung@Others@Cardiovascular@Others@Cardiovascular@Others@Cardiovascular@Cardiovascular@Cardiovascular@Cardiovascular@Cardiovascular@Cardiovascular@Others@Cardiovascular@Cardiovascular@Others@Cardiovascular@Cardiovascular@Cardiovascular@Cardiovascular@Lung@Cardiovascular@Cardiovascular@Cardiovascular@Cardiovascular@Cardiovascular@Cardiovascular@Cardiovascular@Cardiovascular@Cardiovascul…	SRX1672133@SRX5938177@SRX1672130@SRX2404135@SRX2207673@SRX2404140@SRX2207672@SRX2404134@SRX7054619@SRX7054666@SRX7054671@SRX7055006@SRX7054661@SRX7054657@SRX2404132@SRX7054663@SRX2355083@SRX2404133@SRX7054610@SRX7054609@SRX7055004@SRX7055008@SRX212183@SRX7054614@SRX7054665@SRX7055007@SRX7054611@SRX7054670@SRX7054618@SRX7054616@SRX7054662@SRX7054617@SRX4001967@SRX150605@SRX7054664@SRX7054620@SRX16…
FALSE	chr19	45946832	45947082	ERCC2	57	chr19:45946701-45947039@chr19:45946703-45947059@chr19:45946713-45947108@chr19:45946719-45947032@chr19:45946721-45947189@chr19:45946726-45947122@chr19:45946726-45947166@chr19:45946732-45946990@chr19:45946732-45947105@chr19:45946736-45946969@chr19:45946747-45947036@chr19:45946749-45947145@chr19:45946750-45947136@chr19:45946751-45947190@chr19:45946761-45947116@chr19:45946765-45947001@chr19:45946765-…	Cardiovascular@Others@Cardiovascular@Kidney@Cardiovascular@Cardiovascular@Cardiovascular@Cardiovascular@Cardiovascular@Adipocyte@Cardiovascular@Cardiovascular@Cardiovascular@Cardiovascular@Cardiovascular@Others@Cardiovascular@Cardiovascular@Cardiovascular@Cardiovascular@Cardiovascular@Cardiovascular@Cardiovascular@Cardiovascular@Cardiovascular@Cardiovascular@Cardiovascular@Cardiovascular@Cardiova…	SRX2355085@SRX5938177@SRX7054618@SRX2055843@SRX7054661@SRX7054666@SRX2207672@SRX2355078@SRX7054611@SRX813773@SRX2355081@SRX7054617@SRX7054615@SRX2207673@SRX7054616@SRX2404137@SRX7054622@SRX7054664@SRX7055007@SRX7054614@SRX7055004@SRX7054670@SRX7055006@SRX7054660@SRX7054657@SRX112016@SRX4947720@SRX7054667@SRX2355079@SRX7054662@SRX7054671@SRX7055005@SRX7054619@SRX7054665@SRX7054669@SRX7054659@SRX42…
TRUE	chr17	1531230	1533230	SLC43A2	57	chr17:1531732-1532195@chr17:1532079-1532425@chr17:1532122-1532438@chr17:1532126-1532465@chr17:1532133-1532414@chr17:1532134-1532470@chr17:1532135-1532485@chr17:1532141-1532589@chr17:1532147-1532388@chr17:1532147-1532591@chr17:1532148-1532587@chr17:1532150-1532438@chr17:1532163-1532444@chr17:1532166-1532545@chr17:1532166-1532589@chr17:1532172-1532385@chr17:1532173-1532388@chr17:1532173-1532400@chr…	Digestive%20tract@Cardiovascular@Cardiovascular@Cardiovascular@Cardiovascular@Cardiovascular@Cardiovascular@Kidney@Cardiovascular@Cardiovascular@Cardiovascular@Others@Cardiovascular@Others@Cardiovascular@Cardiovascular@Cardiovascular@Cardiovascular@Cardiovascular@Kidney@Cardiovascular@Cardiovascular@Cardiovascular@Cardiovascular@Blood@Cardiovascular@Others@Cardiovascular@Kidney@Cardiovascular@Car…	SRX359916@SRX7054668@SRX7054666@SRX7054661@SRX7054611@SRX7054670@SRX7054614@SRX2055843@SRX7054615@SRX2355085@SRX2207672@SRX2404134@SRX7054622@SRX2404140@SRX2207673@SRX7055006@SRX7054665@SRX7055004@SRX2355078@SRX3636885@SRX2355083@SRX7054659@SRX7054618@SRX7054664@SRX2837382@SRX7054662@SRX5938177@SRX2355081@SRX3346352@SRX7054616@SRX7054617@SRX7055007@SRX7054619@SRX7054667@SRX7054609@SRX017911@SRX23…
FALSE	chr4	152681125	152683125	GATB	56	chr4:152681766-152682480@chr4:152681972-152682487@chr4:152681985-152682330@chr4:152681987-152682245@chr4:152681991-152682346@chr4:152682011-152682161@chr4:152682021-152682308@chr4:152682025-152682284@chr4:152682030-152682308@chr4:152682037-152682326@chr4:152682038-152682224@chr4:152682043-152682291@chr4:152682047-152682283@chr4:152682052-152682319@chr4:152682055-152682314@chr4:152682069-152682266…	Digestive%20tract@Blood@Cardiovascular@Liver@Cardiovascular@Liver@Blood@Blood@Cardiovascular@Cardiovascular@Cardiovascular@Cardiovascular@Cardiovascular@Others@Cardiovascular@Lung@Cardiovascular@Blood@Cardiovascular@Cardiovascular@Blood@Cardiovascular@Cardiovascular@Cardiovascular@Cardiovascular@Blood@Cardiovascular@Cardiovascular@Blood@Blood@Cardiovascular@Cardiovascular@Cardiovascular@Blood@Blo…	SRX359916@SRX150605@SRX7055007@SRX2270129@SRX7054657@SRX2270128@SRX017912@SRX150608@SRX7054618@SRX2355079@SRX7054613@SRX7054664@SRX7055006@SRX5938177@SRX2207672@SRX1672133@SRX2207673@SRX150365@SRX7054614@SRX294971@SRX150359@SRX7055008@SRX425263@SRX7054666@SRX7054661@SRX150362@SRX7054609@SRX7054617@SRX1460848@SRX017872@SRX7054621@SRX2355083@SRX7054615@SRX150606@SRX2837382@SRX7054671@SRX7054619@SRX…
FALSE	chr12	16034387	16036387	STRAP	55	chr12:16034772-16034910@chr12:16034947-16035803@chr12:16034978-16035477@chr12:16035010-16035274@chr12:16035012-16035476@chr12:16035027-16035447@chr12:16035032-16035177@chr12:16035048-16035538@chr12:16035049-16035279@chr12:16035062-16035394@chr12:16035075-16035529@chr12:16035084-16035301@chr12:16035089-16035398@chr12:16035091-16035212@chr12:16035091-16035524@chr12:16035092-16035283@chr12:16035093-…	Blood@Digestive%20tract@Kidney@Blood@Blood@Cardiovascular@Blood@Cardiovascular@Bone@Blood@Cardiovascular@Blood@Blood@Blood@Cardiovascular@Blood@Cardiovascular@Blood@Others@Cardiovascular@Bone@Cardiovascular@Uterus@Blood@Cardiovascular@Uterus@Cardiovascular@Bone@Blood@Cardiovascular@Cardiovascular@Cardiovascular@Cardiovascular@Cardiovascular@Cardiovascular@Liver@Blood@Cardiovascular@Cardiovascular…	SRX150605@SRX359916@SRX2055843@SRX150606@SRX150605@SRX7054666@SRX017872@SRX7054614@SRX3638907@SRX150353@SRX7054615@SRX150610@SRX150608@SRX017895@SRX7054664@SRX150557@SRX7054619@SRX017912@SRX5938177@SRX7054611@SRX3638911@SRX7054661@SRX378804@SRX150365@SRX7054659@SRX378805@SRX7054616@SRX3638908@SRX017883@SRX7055006@SRX2207672@SRX7054671@SRX7054618@SRX2355078@SRX2207673@SRX2270129@SRX017879@SRX70550…
FALSE	chr9	15421931	15423931	SNAPC3	55	chr9:15422416-15423216@chr9:15422464-15422933@chr9:15422469-15422913@chr9:15422485-15422873@chr9:15422494-15422933@chr9:15422505-15422885@chr9:15422505-15422901@chr9:15422508-15422891@chr9:15422511-15422879@chr9:15422513-15422882@chr9:15422521-15423005@chr9:15422525-15422893@chr9:15422536-15422844@chr9:15422537-15422884@chr9:15422541-15422676@chr9:15422542-15422896@chr9:15422546-15422898@chr9:154…	Digestive%20tract@Kidney@Cardiovascular@Cardiovascular@Cardiovascular@Cardiovascular@Cardiovascular@Blood@Cardiovascular@Cardiovascular@Cardiovascular@Cardiovascular@Blood@Cardiovascular@Bone@Cardiovascular@Cardiovascular@Cardiovascular@Cardiovascular@Cardiovascular@Cardiovascular@Blood@Blood@Blood@Cardiovascular@Blood@Blood@Cardiovascular@Cardiovascular@Cardiovascular@Cardiovascular@Cardiovascul…	SRX359916@SRX2055843@SRX7055006@SRX7054661@SRX7054611@SRX7054657@SRX7054614@SRX4001967@SRX7055007@SRX7054615@SRX7054671@SRX2207673@SRX1460848@SRX7054619@SRX3638907@SRX7055004@SRX7054666@SRX7054622@SRX7054609@SRX2207672@SRX7054664@SRX017859@SRX150359@SRX150605@SRX2355079@SRX2837382@SRX017912@SRX7054670@SRX7054669@SRX7054663@SRX7054621@SRX2355078@SRX7054613@SRX7054662@SRX7055008@SRX1460847@SRX70546…
TRUE	chr12	118490290	118490540	WSB2	54	chr12:118490173-118490610@chr12:118490260-118490661@chr12:118490261-118490663@chr12:118490263-118490668@chr12:118490271-118490622@chr12:118490281-118490609@chr12:118490282-118490651@chr12:118490283-118490609@chr12:118490283-118490655@chr12:118490286-118490645@chr12:118490288-118490639@chr12:118490291-118490626@chr12:118490295-118490620@chr12:118490300-118490592@chr12:118490300-118490638@chr12:118…	Digestive%20tract@Cardiovascular@Cardiovascular@Cardiovascular@Adipocyte@Cardiovascular@Cardiovascular@Others@Cardiovascular@Others@Cardiovascular@Cardiovascular@Cardiovascular@Others@Cardiovascular@Cardiovascular@Cardiovascular@Others@Cardiovascular@Cardiovascular@Cardiovascular@Cardiovascular@Lung@Cardiovascular@Cardiovascular@Cardiovascular@Others@Cardiovascular@Adipocyte@Cardiovascular@Cardio…	SRX359916@SRX2207673@SRX7054666@SRX7054661@SRX813772@SRX7054611@SRX7054614@SRX2404140@SRX2207672@SRX5938177@SRX7055007@SRX7054617@SRX7054663@SRX2404135@SRX7054619@SRX7054657@SRX7054664@SRX2404132@SRX7054671@SRX7054665@SRX7054668@SRX7054662@SRX212183@SRX7055004@SRX7054659@SRX425264@SRX2404134@SRX7054616@SRX813773@SRX7054622@SRX7055006@SRX7054618@SRX7054670@SRX7054615@SRX2404133@SRX2207671@SRX70550…
TRUE	chr1	212732170	212732420	ATF3	54	chr1:212732023-212732577@chr1:212732098-212732449@chr1:212732101-212732664@chr1:212732109-212732394@chr1:212732123-212732383@chr1:212732134-212732398@chr1:212732135-212732508@chr1:212732140-212732428@chr1:212732151-212732562@chr1:212732166-212732494@chr1:212732170-212732608@chr1:212732175-212732444@chr1:212732178-212732538@chr1:212732178-212732558@chr1:212732180-212732406@chr1:212732180-212732537…	Cardiovascular@Blood@Blood@Kidney@Cardiovascular@Kidney@Cardiovascular@Blood@Cardiovascular@Cardiovascular@Cardiovascular@Kidney@Cardiovascular@Cardiovascular@Cardiovascular@Cardiovascular@Cardiovascular@Cardiovascular@Cardiovascular@Cardiovascular@Cardiovascular@Cardiovascular@Cardiovascular@Others@Cardiovascular@Cardiovascular@Uterus@Cardiovascular@Cardiovascular@Cardiovascular@Cardiovascular@C…	SRX2207672@SRX017911@SRX150605@SRX2055843@SRX294971@SRX3346352@SRX7055007@SRX4001967@SRX2207673@SRX7054671@SRX7054657@SRX3636885@SRX7054611@SRX7054661@SRX7054622@SRX7054618@SRX7054615@SRX7054614@SRX7055004@SRX7054666@SRX7055006@SRX7054664@SRX7054621@SRX5938177@SRX7054667@SRX7055005@SRX378805@SRX7054616@SRX2355079@SRX7054670@SRX7054662@SRX2355085@SRX7054617@SRX378804@SRX7054668@SRX7054659@SRX70546…
TRUE	chr9	34611310	34613310	RPP25L	54	chr9:34611919-34612095@chr9:34611926-34612409@chr9:34611931-34612378@chr9:34611955-34612397@chr9:34611957-34612110@chr9:34611961-34612391@chr9:34611964-34612328@chr9:34611965-34612369@chr9:34611966-34612351@chr9:34611969-34612357@chr9:34611974-34612372@chr9:34611978-34612331@chr9:34611979-34612269@chr9:34611981-34612277@chr9:34611985-34612477@chr9:34611987-34612340@chr9:34611991-34612377@chr9:346…	Blood@Cardiovascular@Cardiovascular@Cardiovascular@Blood@Cardiovascular@Cardiovascular@Cardiovascular@Cardiovascular@Cardiovascular@Bone@Cardiovascular@Cardiovascular@Cardiovascular@Cardiovascular@Cardiovascular@Cardiovascular@Cardiovascular@Cardiovascular@Bone@Cardiovascular@Cardiovascular@Cardiovascular@Cardiovascular@Cardiovascular@Cardiovascular@Cardiovascular@Cardiovascular@Cardiovascular@Ca…	SRX150605@SRX7054614@SRX7054666@SRX7054618@SRX150608@SRX7054671@SRX7054621@SRX7055006@SRX7054657@SRX7054615@SRX3638907@SRX7054662@SRX7054659@SRX7054667@SRX7054661@SRX7055007@SRX7054670@SRX7055004@SRX7054617@SRX3638911@SRX7054611@SRX2355078@SRX2355083@SRX7054663@SRX7054619@SRX7054616@SRX2355079@SRX7054622@SRX7054664@SRX2355085@SRX2355081@SRX2207672@SRX7054668@SRX7055008@SRX7054609@SRX7054669@SRX70…
FALSE	chr1	11321708	11323708	MTOR	54	chr1:11322472-11322604@chr1:11322513-11323092@chr1:11322530-11322963@chr1:11322538-11322996@chr1:11322577-11322939@chr1:11322579-11323043@chr1:11322585-11322995@chr1:11322646-11323024@chr1:11322654-11322931@chr1:11322671-11322977@chr1:11322684-11323016@chr1:11322687-11322950@chr1:11322692-11322944@chr1:11322695-11323004@chr1:11322697-11322958@chr1:11322698-11322935@chr1:11322702-11322865@chr1:113…	Bone@Digestive%20tract@Cardiovascular@Cardiovascular@Blood@Cardiovascular@Cardiovascular@Kidney@Cardiovascular@Cardiovascular@Cardiovascular@Cardiovascular@Cardiovascular@Cardiovascular@Cardiovascular@Cardiovascular@Cardiovascular@Cardiovascular@Cardiovascular@Cardiovascular@Others@Cardiovascular@Cardiovascular@Cardiovascular@Cardiovascular@Kidney@Cardiovascular@Cardiovascular@Blood@Cardiovascula…	SRX3638911@SRX359916@SRX7054661@SRX2207673@SRX1460848@SRX7054666@SRX7054618@SRX3636885@SRX7054611@SRX2355078@SRX7054615@SRX7055007@SRX7054668@SRX2355085@SRX7054614@SRX7054617@SRX7054621@SRX2355079@SRX7054616@SRX7054657@SRX5938177@SRX2207672@SRX7054622@SRX7054670@SRX2207671@SRX2055843@SRX7054671@SRX7054662@SRX150610@SRX7055006@SRX150605@SRX2355083@SRX150606@SRX7054664@SRX017895@SRX017912@SRX017891…
TRUE	chr4	5040010	5040260	CYTL1	53	chr4:5039729-5040172@chr4:5039751-5040217@chr4:5039757-5040123@chr4:5039760-5040216@chr4:5039766-5040178@chr4:5039767-5040204@chr4:5039770-5040217@chr4:5039773-5040210@chr4:5039777-5040241@chr4:5039779-5040207@chr4:5039788-5040147@chr4:5039792-5040162@chr4:5039793-5040222@chr4:5039794-5040124@chr4:5039798-5040179@chr4:5039799-5040172@chr4:5039799-5040209@chr4:5039801-5040264@chr4:5039804-5040182@…	Cardiovascular@Cardiovascular@Cardiovascular@Cardiovascular@Cardiovascular@Cardiovascular@Cardiovascular@Cardiovascular@Cardiovascular@Cardiovascular@Cardiovascular@Cardiovascular@Cardiovascular@Cardiovascular@Cardiovascular@Cardiovascular@Cardiovascular@Others@Cardiovascular@Cardiovascular@Cardiovascular@Cardiovascular@Cardiovascular@Cardiovascular@Cardiovascular@Cardiovascular@Cardiovascular@Ca…	SRX2207672@SRX7054615@SRX2207673@SRX7054661@SRX7054657@SRX2355079@SRX7054617@SRX7054671@SRX7055007@SRX7054611@SRX7054618@SRX7054610@SRX7054663@SRX2355085@SRX7054662@SRX7054613@SRX7054666@SRX5938177@SRX7054614@SRX7054609@SRX7054670@SRX2207671@SRX7055006@SRX7054616@SRX7054668@SRX7054664@SRX7054622@SRX7054619@SRX2404140@SRX7054623@SRX1672133@SRX2404135@SRX2404132@SRX212183@SRX7054624@SRX7054667@SRX7…
FALSE	chr2	111966606	111966856	BCL2L11	53	chr2:111966553-111966924@chr2:111966571-111967049@chr2:111966580-111967032@chr2:111966596-111966991@chr2:111966602-111966895@chr2:111966604-111966998@chr2:111966605-111966927@chr2:111966608-111966935@chr2:111966615-111967043@chr2:111966622-111966799@chr2:111966624-111966875@chr2:111966624-111967072@chr2:111966627-111967036@chr2:111966628-111967018@chr2:111966630-111966880@chr2:111966631-111967017…	Kidney@Blood@Blood@Blood@Cardiovascular@Blood@Digestive%20tract@Kidney@Blood@Cardiovascular@Blood@Blood@Blood@Blood@Blood@Blood@Blood@Kidney@Blood@Lung@Blood@Lung@Blood@Blood@Blood@Blood@Blood@Blood@Blood@Blood@Blood@Blood@Cardiovascular@Blood@Blood@Blood@Blood@Blood@Blood@Blood@Blood@Blood@Blood@Blood@Blood@Cardiovascular@Blood@Blood@Blood@Blood@Blood@Blood@Blood	SRX2055843@SRX150557@SRX017906@SRX2837382@SRX2207672@SRX017905@SRX3102571@SRX3636885@SRX150353@SRX7054618@SRX017896@SRX150605@SRX017871@SRX150610@SRX017883@SRX150362@SRX017913@SRX3346352@SRX017912@SRX1672133@SRX017907@SRX212183@SRX017865@SRX017867@SRX150365@SRX017872@SRX017884@SRX150359@SRX017891@SRX017900@SRX017894@SRX017860@SRX2355085@SRX017908@SRX017897@SRX150361@SRX150608@SRX017870@SRX017859@…
TRUE	chr19	8051734	8051984	ELAVL1	52	chr19:8051678-8052029@chr19:8051696-8052027@chr19:8051702-8051993@chr19:8051721-8051984@chr19:8051726-8051965@chr19:8051734-8052081@chr19:8051737-8051999@chr19:8051740-8051974@chr19:8051743-8051983@chr19:8051743-8052067@chr19:8051745-8052001@chr19:8051764-8051999@chr19:8051764-8052100@chr19:8051766-8052034@chr19:8051766-8052059@chr19:8051767-8051978@chr19:8051769-8052069@chr19:8051769-8052071@chr…	Cardiovascular@Cardiovascular@Others@Others@Uterus@Cardiovascular@Others@Digestive%20tract@Others@Cardiovascular@Lung@Cardiovascular@Cardiovascular@Cardiovascular@Cardiovascular@Cardiovascular@Cardiovascular@Cardiovascular@Cardiovascular@Cardiovascular@Others@Cardiovascular@Uterus@Cardiovascular@Cardiovascular@Cardiovascular@Prostate@Cardiovascular@Cardiovascular@Prostate@Cardiovascular@Blood@Blo…	SRX2207673@SRX2207672@SRX5938177@SRX2404135@SRX027912@SRX7054661@SRX2404134@SRX3102571@SRX2404133@SRX7055007@SRX212183@SRX2355083@SRX7054670@SRX7054617@SRX7054666@SRX7054662@SRX7054614@SRX7055006@SRX7054619@SRX425263@SRX2404132@SRX7054618@SRX027913@SRX2355085@SRX7054671@SRX7054616@SRX1885199@SRX7054663@SRX7054621@SRX1885171@SRX7054611@SRX017912@SRX150605@SRX7055004@SRX1885200@SRX7054667@SRX188517…
FALSE	chrX	23822187	23822437	SAT1	52	chrX:23822034-23822600@chrX:23822079-23822606@chrX:23822087-23822560@chrX:23822091-23822599@chrX:23822094-23822583@chrX:23822105-23822530@chrX:23822105-23822618@chrX:23822109-23822594@chrX:23822113-23822644@chrX:23822120-23822595@chrX:23822120-23822630@chrX:23822122-23822537@chrX:23822122-23822603@chrX:23822134-23822530@chrX:23822138-23822334@chrX:23822138-23822567@chrX:23822144-23822571@chrX:238…	Others@Cardiovascular@Cardiovascular@Cardiovascular@Others@Cardiovascular@Cardiovascular@Cardiovascular@Cardiovascular@Cardiovascular@Cardiovascular@Cardiovascular@Cardiovascular@Cardiovascular@Uterus@Cardiovascular@Cardiovascular@Cardiovascular@Others@Cardiovascular@Cardiovascular@Cardiovascular@Cardiovascular@Uterus@Cardiovascular@Cardiovascular@Cardiovascular@Uterus@Cardiovascular@Cardiovascul…	SRX5938177@SRX7055007@SRX7054671@SRX7054617@SRX2404140@SRX7055008@SRX7054615@SRX7054611@SRX7054666@SRX7055006@SRX7054661@SRX7054668@SRX7054621@SRX7054664@SRX027912@SRX7054657@SRX7054614@SRX7055004@SRX2404135@SRX7054619@SRX7054669@SRX7054660@SRX7054616@SRX378805@SRX7054618@SRX7054667@SRX7054670@SRX027913@SRX7054663@SRX7054622@SRX7054609@SRX7055005@SRX7054662@SRX2207673@SRX2207672@SRX7054610@SRX235…
FALSE	chr6	170101407	170103407	C6orf120	52	chr6:170101951-170102232@chr6:170101953-170102309@chr6:170101956-170102388@chr6:170101979-170102936@chr6:170101989-170102423@chr6:170101994-170102414@chr6:170101994-170102438@chr6:170102014-170102203@chr6:170102016-170102434@chr6:170102017-170102425@chr6:170102022-170102402@chr6:170102026-170102288@chr6:170102026-170102545@chr6:170102032-170102437@chr6:170102037-170102489@chr6:170102045-170102277…	Cardiovascular@Kidney@Bone@Digestive%20tract@Cardiovascular@Cardiovascular@Cardiovascular@Blood@Cardiovascular@Cardiovascular@Blood@Cardiovascular@Cardiovascular@Cardiovascular@Cardiovascular@Blood@Others@Cardiovascular@Blood@Cardiovascular@Cardiovascular@Blood@Cardiovascular@Blood@Cardiovascular@Cardiovascular@Cardiovascular@Cardiovascular@Cardiovascular@Cardiovascular@Cardiovascular@Blood@Cardi…	SRX7054665@SRX2055843@SRX3638907@SRX359916@SRX7054611@SRX7055006@SRX7054666@SRX4401064@SRX7054615@SRX7054664@SRX150605@SRX7054672@SRX7054661@SRX4947721@SRX7055007@SRX150608@SRX5938177@SRX7054659@SRX1460848@SRX7055008@SRX7054614@SRX150606@SRX7054671@SRX017879@SRX7054619@SRX7054622@SRX7054618@SRX7054621@SRX7054657@SRX7055004@SRX2207672@SRX150359@SRX2207673@SRX7054670@SRX7054616@SRX2355085@SRX705466…
TRUE	chr2	175112048	175114048	OLA1	52	chr2:175112604-175113313@chr2:175112610-175113113@chr2:175112624-175113238@chr2:175112642-175112917@chr2:175112647-175112874@chr2:175112663-175112903@chr2:175112666-175112836@chr2:175112676-175112856@chr2:175112688-175112852@chr2:175112690-175112892@chr2:175112694-175112887@chr2:175112696-175112849@chr2:175112697-175113011@chr2:175112701-175112840@chr2:175112701-175112875@chr2:175112709-175112879…	Cardiovascular@Cardiovascular@Kidney@Liver@Breast@Breast@Digestive%20tract@Cardiovascular@Prostate@Cardiovascular@Prostate@Prostate@Cardiovascular@Prostate@Cardiovascular@Cardiovascular@Prostate@Prostate@Cardiovascular@Digestive%20tract@Kidney@Blood@Blood@Cardiovascular@Cardiovascular@Blood@Cardiovascular@Blood@Cardiovascular@Cardiovascular@Cardiovascular@Others@Uterus@Cardiovascular@Blood@Blood@…	SRX2207672@SRX2207673@SRX2055843@SRX2270129@SRX968976@SRX968978@SRX3102571@SRX4947721@SRX1885172@SRX7054618@SRX1885200@SRX1885169@SRX7054617@SRX1885170@SRX2355085@SRX7055008@SRX1885199@SRX1885171@SRX7054666@SRX359916@SRX3346352@SRX017911@SRX2837382@SRX7054671@SRX7055007@SRX150605@SRX7054615@SRX1460848@SRX4947721@SRX2355078@SRX2355085@SRX5938177@SRX378804@SRX7054664@SRX1460847@SRX017911@SRX7054657…
FALSE	chr20	47600110	47600360	ARFGEF2	51	chr20:47599895-47600471@chr20:47599909-47600244@chr20:47599911-47600551@chr20:47599914-47600431@chr20:47599926-47600411@chr20:47599931-47600419@chr20:47599939-47600373@chr20:47599941-47600482@chr20:47599946-47600350@chr20:47599948-47600419@chr20:47599950-47600417@chr20:47599952-47600242@chr20:47599953-47600412@chr20:47599953-47600422@chr20:47599955-47600300@chr20:47599956-47600330@chr20:47599956-…	Cardiovascular@Cardiovascular@Cardiovascular@Cardiovascular@Cardiovascular@Cardiovascular@Cardiovascular@Cardiovascular@Cardiovascular@Cardiovascular@Cardiovascular@Cardiovascular@Cardiovascular@Cardiovascular@Cardiovascular@Cardiovascular@Cardiovascular@Cardiovascular@Cardiovascular@Cardiovascular@Cardiovascular@Cardiovascular@Cardiovascular@Cardiovascular@Cardiovascular@Cardiovascular@Cardiovas…	SRX2207673@SRX425264@SRX2207672@SRX7054666@SRX7054611@SRX7054614@SRX7054618@SRX7054661@SRX7054657@SRX7055007@SRX7055006@SRX425263@SRX7054662@SRX7054664@SRX7055004@SRX7054619@SRX7054670@SRX7054615@SRX7054617@SRX2355079@SRX7054668@SRX7054663@SRX7054671@SRX7054616@SRX7055008@SRX7054621@SRX7054665@SRX7055005@SRX7054672@SRX7054622@SRX2207671@SRX7054609@SRX7054659@SRX2355081@SRX7054613@SRX2355085@SRX70…
FALSE	chr12	58137671	58139671	TSPAN31	51	chr12:58138302-58139182@chr12:58138348-58138610@chr12:58138600-58138797@chr12:58138630-58138850@chr12:58138636-58138855@chr12:58138643-58138832@chr12:58138676-58139278@chr12:58138723-58139256@chr12:58138761-58139267@chr12:58138813-58139340@chr12:58138836-58139294@chr12:58138844-58139201@chr12:58138852-58139130@chr12:58138857-58139270@chr12:58138868-58139224@chr12:58138887-58139275@chr12:58138897-…	Digestive%20tract@Cardiovascular@Cardiovascular@Cardiovascular@Cardiovascular@Cardiovascular@Cardiovascular@Cardiovascular@Kidney@Others@Blood@Blood@Cardiovascular@Others@Cardiovascular@Cardiovascular@Cardiovascular@Cardiovascular@Cardiovascular@Cardiovascular@Others@Others@Others@Cardiovascular@Cardiovascular@Blood@Blood@Others@Cardiovascular@Others@Cardiovascular@Cardiovascular@Cardiovascular@C…	SRX359916@SRX7054661@SRX7054611@SRX2355078@SRX2355085@SRX7054618@SRX7054661@SRX7054670@SRX2055843@SRX5938177@SRX150605@SRX017911@SRX7054671@SRX2404140@SRX7054666@SRX2207673@SRX7054662@SRX2207672@SRX7054611@SRX7054621@SRX2404137@SRX2404134@SRX2404135@SRX7054614@SRX7054657@SRX017912@SRX017913@SRX2404133@SRX7055004@SRX2404132@SRX7054617@SRX7055007@SRX7054659@SRX7054667@SRX378805@SRX017906@SRX017897@…
FALSE	chr6	150322564	150322814	ULBP3	50	chr6:150322388-150322686@chr6:150322388-150322686@chr6:150322401-150322733@chr6:150322401-150322733@chr6:150322407-150322775@chr6:150322407-150322775@chr6:150322409-150322771@chr6:150322409-150322771@chr6:150322410-150322699@chr6:150322410-150322699@chr6:150322415-150322691@chr6:150322415-150322691@chr6:150322419-150322749@chr6:150322419-150322749@chr6:150322420-150322738@chr6:150322420-150322738…	Blood@Blood@Blood@Blood@Blood@Blood@Blood@Blood@Blood@Blood@Blood@Blood@Blood@Blood@Blood@Blood@Blood@Blood@Blood@Blood@Blood@Blood@Blood@Blood@Blood@Blood@Blood@Blood@Blood@Blood@Blood@Blood@Blood@Blood@Blood@Blood@Blood@Blood@Blood@Blood@Blood@Blood@Blood@Blood@Blood@Blood@Blood@Blood@Blood@Blood	SRX017905@SRX017905@SRX2837382@SRX2837382@SRX150557@SRX150557@SRX150605@SRX150605@SRX150365@SRX150365@SRX017891@SRX017891@SRX017912@SRX017912@SRX017913@SRX017913@SRX150362@SRX150362@SRX150606@SRX150606@SRX017906@SRX017906@SRX017883@SRX017883@SRX017884@SRX017884@SRX017860@SRX017860@SRX017908@SRX017908@SRX150353@SRX150353@SRX150359@SRX150359@SRX150610@SRX150610@SRX017865@SRX017865@SRX017897@SRX0178…
FALSE	chr6	150322564	150322814	ULBP1	50	chr6:150322388-150322686@chr6:150322388-150322686@chr6:150322401-150322733@chr6:150322401-150322733@chr6:150322407-150322775@chr6:150322407-150322775@chr6:150322409-150322771@chr6:150322409-150322771@chr6:150322410-150322699@chr6:150322410-150322699@chr6:150322415-150322691@chr6:150322415-150322691@chr6:150322419-150322749@chr6:150322419-150322749@chr6:150322420-150322738@chr6:150322420-150322738…	Blood@Blood@Blood@Blood@Blood@Blood@Blood@Blood@Blood@Blood@Blood@Blood@Blood@Blood@Blood@Blood@Blood@Blood@Blood@Blood@Blood@Blood@Blood@Blood@Blood@Blood@Blood@Blood@Blood@Blood@Blood@Blood@Blood@Blood@Blood@Blood@Blood@Blood@Blood@Blood@Blood@Blood@Blood@Blood@Blood@Blood@Blood@Blood@Blood@Blood	SRX017905@SRX017905@SRX2837382@SRX2837382@SRX150557@SRX150557@SRX150605@SRX150605@SRX150365@SRX150365@SRX017891@SRX017891@SRX017912@SRX017912@SRX017913@SRX017913@SRX150362@SRX150362@SRX150606@SRX150606@SRX017906@SRX017906@SRX017883@SRX017883@SRX017884@SRX017884@SRX017860@SRX017860@SRX017908@SRX017908@SRX150353@SRX150353@SRX150359@SRX150359@SRX150610@SRX150610@SRX017865@SRX017865@SRX017897@SRX0178…
TRUE	chr11	130784832	130786832	SNX19	50	chr11:130786024-130786716@chr11:130786142-130786636@chr11:130786145-130786639@chr11:130786178-130786613@chr11:130786191-130786386@chr11:130786209-130786567@chr11:130786220-130786615@chr11:130786228-130786597@chr11:130786235-130786544@chr11:130786236-130786555@chr11:130786242-130786536@chr11:130786243-130786529@chr11:130786243-130786616@chr11:130786247-130786515@chr11:130786252-130786601@chr11:130…	Digestive%20tract@Cardiovascular@Cardiovascular@Cardiovascular@Cardiovascular@Cardiovascular@Cardiovascular@Cardiovascular@Cardiovascular@Cardiovascular@Cardiovascular@Cardiovascular@Cardiovascular@Kidney@Cardiovascular@Kidney@Cardiovascular@Blood@Others@Blood@Cardiovascular@Blood@Liver@Cardiovascular@Cardiovascular@Cardiovascular@Cardiovascular@Blood@Cardiovascular@Cardiovascular@Cardiovascular@…	SRX359916@SRX7054671@SRX7054664@SRX7055007@SRX425264@SRX7054622@SRX7054614@SRX7054621@SRX7054666@SRX7054662@SRX7054667@SRX7054657@SRX7054619@SRX3636885@SRX2207672@SRX2055843@SRX7054661@SRX1460848@SRX5938177@SRX150608@SRX2207673@SRX4001967@SRX2270129@SRX7054618@SRX7054615@SRX7055004@SRX2355079@SRX2837382@SRX7055008@SRX7054623@SRX7055006@SRX2355078@SRX150605@SRX1460847@SRX2355081@SRX425263@SRX23550…
FALSE	chr4	170540471	170542471	CLCN3	50	chr4:170541270-170541501@chr4:170541291-170541859@chr4:170541328-170541792@chr4:170541332-170541831@chr4:170541339-170541727@chr4:170541348-170541500@chr4:170541350-170541519@chr4:170541351-170541475@chr4:170541368-170541755@chr4:170541368-170541908@chr4:170541371-170541521@chr4:170541374-170541816@chr4:170541375-170541841@chr4:170541375-170541886@chr4:170541376-170541858@chr4:170541376-170541922…	Blood@Cardiovascular@Cardiovascular@Cardiovascular@Cardiovascular@Blood@Breast@Blood@Blood@Digestive%20tract@Cardiovascular@Cardiovascular@Cardiovascular@Cardiovascular@Cardiovascular@Cardiovascular@Cardiovascular@Cardiovascular@Cardiovascular@Cardiovascular@Cardiovascular@Cardiovascular@Others@Cardiovascular@Cardiovascular@Cardiovascular@Cardiovascular@Cardiovascular@Blood@Cardiovascular@Cardiov…	SRX150605@SRX7054671@SRX7055004@SRX7054615@SRX2355083@SRX150608@SRX968976@SRX150365@SRX4401064@SRX359916@SRX7054672@SRX7054622@SRX7054621@SRX7055007@SRX7054666@SRX7054661@SRX7054618@SRX7054611@SRX2207673@SRX7054614@SRX4947721@SRX7054670@SRX5938177@SRX7054657@SRX7054619@SRX7054609@SRX7054664@SRX7054617@SRX1460848@SRX7054667@SRX7055008@SRX2207672@SRX7054610@SRX7055006@SRX2355079@SRX2355085@SRX70546…
TRUE	chr17	43170387	43170637	DCAKD	49	chr17:43170288-43170681@chr17:43170288-43170718@chr17:43170291-43170665@chr17:43170292-43170672@chr17:43170294-43170670@chr17:43170305-43170632@chr17:43170308-43170595@chr17:43170308-43170663@chr17:43170310-43170609@chr17:43170310-43170609@chr17:43170315-43170637@chr17:43170318-43170617@chr17:43170322-43170688@chr17:43170323-43170622@chr17:43170324-43170654@chr17:43170327-43170617@chr17:43170329-…	Cardiovascular@Cardiovascular@Cardiovascular@Cardiovascular@Cardiovascular@Cardiovascular@Cardiovascular@Cardiovascular@Cardiovascular@Cardiovascular@Cardiovascular@Cardiovascular@Cardiovascular@Cardiovascular@Cardiovascular@Cardiovascular@Cardiovascular@Cardiovascular@Cardiovascular@Cardiovascular@Lung@Cardiovascular@Cardiovascular@Cardiovascular@Cardiovascular@Cardiovascular@Cardiovascular@Card…	SRX2207672@SRX7054666@SRX7055006@SRX7054615@SRX2207673@SRX7055007@SRX7054610@SRX7054661@SRX2355081@SRX2355085@SRX7054670@SRX7054616@SRX7054614@SRX7054671@SRX7054617@SRX2355083@SRX7054611@SRX2355079@SRX7054667@SRX7054619@SRX212183@SRX7054672@SRX7054621@SRX7054668@SRX7054662@SRX7054657@SRX7055008@SRX7054623@SRX7054618@SRX7054663@SRX7054665@SRX7054664@SRX7054624@SRX7055004@SRX7054609@SRX813773@SRX70…
FALSE	chr11	27303852	27304102	CCDC34	48	chr11:27303678-27304140@chr11:27303696-27304177@chr11:27303696-27304187@chr11:27303702-27304183@chr11:27303708-27304165@chr11:27303717-27304153@chr11:27303717-27304165@chr11:27303717-27304166@chr11:27303724-27304139@chr11:27303725-27304142@chr11:27303732-27304145@chr11:27303738-27304149@chr11:27303744-27304143@chr11:27303745-27304134@chr11:27303747-27304145@chr11:27303747-27304149@chr11:27303756-…	Cardiovascular@Cardiovascular@Cardiovascular@Cardiovascular@Cardiovascular@Cardiovascular@Cardiovascular@Cardiovascular@Cardiovascular@Cardiovascular@Cardiovascular@Cardiovascular@Cardiovascular@Cardiovascular@Cardiovascular@Cardiovascular@Cardiovascular@Cardiovascular@Cardiovascular@Cardiovascular@Cardiovascular@Cardiovascular@Cardiovascular@Cardiovascular@Cardiovascular@Cardiovascular@Cardiovas…	SRX7054616@SRX7054617@SRX2207672@SRX2207673@SRX7054661@SRX7054670@SRX7055007@SRX7054619@SRX7054662@SRX7054671@SRX7054663@SRX7054618@SRX7054611@SRX7054667@SRX7055004@SRX7054664@SRX7054621@SRX7054666@SRX7055006@SRX7054613@SRX2355078@SRX2355079@SRX7054610@SRX425264@SRX7054615@SRX2207671@SRX7054657@SRX7054609@SRX7055008@SRX7054668@SRX7054612@SRX7054614@SRX7054665@SRX7054622@SRX7054623@SRX2355083@SRX7…
TRUE	chr19	47931432	47931682	C5AR2	48	chr19:47931319-47931656@chr19:47931319-47931656@chr19:47931325-47931674@chr19:47931325-47931674@chr19:47931326-47931768@chr19:47931326-47931768@chr19:47931360-47931690@chr19:47931360-47931690@chr19:47931385-47931791@chr19:47931385-47931791@chr19:47931388-47931710@chr19:47931388-47931710@chr19:47931400-47931724@chr19:47931400-47931724@chr19:47931400-47931764@chr19:47931400-47931764@chr19:47931404-…	Cardiovascular@Cardiovascular@Cardiovascular@Cardiovascular@Cardiovascular@Cardiovascular@Cardiovascular@Cardiovascular@Cardiovascular@Cardiovascular@Cardiovascular@Cardiovascular@Cardiovascular@Cardiovascular@Cardiovascular@Cardiovascular@Cardiovascular@Cardiovascular@Cardiovascular@Cardiovascular@Cardiovascular@Cardiovascular@Cardiovascular@Cardiovascular@Cardiovascular@Cardiovascular@Cardiovas…	SRX2207672@SRX2207672@SRX2355083@SRX2355083@SRX2355085@SRX2355085@SRX7054614@SRX7054614@SRX7054661@SRX7054661@SRX7054666@SRX7054666@SRX2355079@SRX2355079@SRX2355081@SRX2355081@SRX2207673@SRX2207673@SRX7054622@SRX7054622@SRX7054664@SRX7054664@SRX7054618@SRX7054618@SRX7054615@SRX7054615@SRX7054611@SRX7054611@SRX7054662@SRX7054662@SRX7054671@SRX7054671@SRX7055006@SRX7055006@SRX7054616@SRX7054616@SRX…
TRUE	chr1	113243461	113243711	CAPZA1	48	chr1:113243131-113243707@chr1:113243131-113243708@chr1:113243138-113243658@chr1:113243142-113243630@chr1:113243143-113243645@chr1:113243145-113243658@chr1:113243149-113243670@chr1:113243151-113243691@chr1:113243156-113243593@chr1:113243160-113243604@chr1:113243164-113243577@chr1:113243165-113243680@chr1:113243170-113243671@chr1:113243171-113243660@chr1:113243173-113243642@chr1:113243175-113243703…	Cardiovascular@Cardiovascular@Cardiovascular@Cardiovascular@Cardiovascular@Cardiovascular@Cardiovascular@Cardiovascular@Cardiovascular@Cardiovascular@Cardiovascular@Cardiovascular@Cardiovascular@Cardiovascular@Cardiovascular@Cardiovascular@Cardiovascular@Cardiovascular@Cardiovascular@Cardiovascular@Cardiovascular@Cardiovascular@Cardiovascular@Cardiovascular@Cardiovascular@Cardiovascular@Cardiovas…	SRX2207672@SRX2207673@SRX7054671@SRX7054670@SRX7054659@SRX7054619@SRX7054614@SRX7054666@SRX7054621@SRX2207671@SRX7054667@SRX7054664@SRX2355078@SRX7055007@SRX7055004@SRX2355085@SRX7055006@SRX7054661@SRX7054615@SRX7054660@SRX7054657@SRX7055008@SRX7054616@SRX7054622@SRX7054611@SRX7054665@SRX425264@SRX7054663@SRX7054610@SRX7054617@SRX7054662@SRX7054668@SRX7054624@SRX7054623@SRX7054672@SRX7055005@SRX7…
TRUE	chr19	47931432	47931682	NAPA	48	chr19:47931319-47931656@chr19:47931319-47931656@chr19:47931325-47931674@chr19:47931325-47931674@chr19:47931326-47931768@chr19:47931326-47931768@chr19:47931360-47931690@chr19:47931360-47931690@chr19:47931385-47931791@chr19:47931385-47931791@chr19:47931388-47931710@chr19:47931388-47931710@chr19:47931400-47931724@chr19:47931400-47931724@chr19:47931400-47931764@chr19:47931400-47931764@chr19:47931404-…	Cardiovascular@Cardiovascular@Cardiovascular@Cardiovascular@Cardiovascular@Cardiovascular@Cardiovascular@Cardiovascular@Cardiovascular@Cardiovascular@Cardiovascular@Cardiovascular@Cardiovascular@Cardiovascular@Cardiovascular@Cardiovascular@Cardiovascular@Cardiovascular@Cardiovascular@Cardiovascular@Cardiovascular@Cardiovascular@Cardiovascular@Cardiovascular@Cardiovascular@Cardiovascular@Cardiovas…	SRX2207672@SRX2207672@SRX2355083@SRX2355083@SRX2355085@SRX2355085@SRX7054614@SRX7054614@SRX7054661@SRX7054661@SRX7054666@SRX7054666@SRX2355079@SRX2355079@SRX2355081@SRX2355081@SRX2207673@SRX2207673@SRX7054622@SRX7054622@SRX7054664@SRX7054664@SRX7054618@SRX7054618@SRX7054615@SRX7054615@SRX7054611@SRX7054611@SRX7054662@SRX7054662@SRX7054671@SRX7054671@SRX7055006@SRX7055006@SRX7054616@SRX7054616@SRX…
FALSE	chr16	85061056	85063056	KIAA0513	48	chr16:85061039-85061350@chr16:85061044-85061265@chr16:85061059-85061255@chr16:85061075-85061470@chr16:85061077-85061258@chr16:85061080-85061275@chr16:85061089-85061422@chr16:85061101-85061342@chr16:85061138-85061479@chr16:85061150-85061396@chr16:85061165-85061416@chr16:85061170-85061389@chr16:85061177-85061377@chr16:85061183-85061521@chr16:85061190-85061459@chr16:85061195-85061455@chr16:85061197-…	Cardiovascular@Cardiovascular@Bone@Cardiovascular@Blood@Cardiovascular@Cardiovascular@Cardiovascular@Cardiovascular@Cardiovascular@Cardiovascular@Cardiovascular@Cardiovascular@Cardiovascular@Cardiovascular@Cardiovascular@Cardiovascular@Uterus@Uterus@Blood@Cardiovascular@Cardiovascular@Cardiovascular@Cardiovascular@Cardiovascular@Cardiovascular@Cardiovascular@Bone@Cardiovascular@Cardiovascular@Car…	SRX2355079@SRX7054666@SRX3638907@SRX7054664@SRX150359@SRX7054661@SRX7054614@SRX7054622@SRX2207672@SRX7054672@SRX7054671@SRX7055006@SRX7054619@SRX2355085@SRX2207673@SRX2355081@SRX7054609@SRX378805@SRX378804@SRX1460848@SRX7054618@SRX7054662@SRX2355078@SRX7054670@SRX2355083@SRX7054615@SRX7054668@SRX3638907@SRX2207672@SRX7054661@SRX7054617@SRX7054670@SRX7054616@SRX7055007@SRX7054666@SRX7055006@SRX705…
FALSE	chr1	209981496	209981746	C1orf74	47	chr1:209981345-209981933@chr1:209981350-209981936@chr1:209981355-209981763@chr1:209981376-209981706@chr1:209981379-209981698@chr1:209981388-209981720@chr1:209981390-209981723@chr1:209981394-209981723@chr1:209981398-209981724@chr1:209981399-209981740@chr1:209981399-209981766@chr1:209981401-209981685@chr1:209981401-209981715@chr1:209981402-209981772@chr1:209981406-209981714@chr1:209981409-209981673…	Cardiovascular@Cardiovascular@Cardiovascular@Cardiovascular@Cardiovascular@Cardiovascular@Cardiovascular@Cardiovascular@Cardiovascular@Cardiovascular@Cardiovascular@Cardiovascular@Cardiovascular@Cardiovascular@Cardiovascular@Cardiovascular@Cardiovascular@Cardiovascular@Cardiovascular@Cardiovascular@Others@Others@Cardiovascular@Cardiovascular@Cardiovascular@Cardiovascular@Cardiovascular@Cardiovasc…	SRX2207673@SRX2207672@SRX7054661@SRX7054616@SRX7054622@SRX7054670@SRX7054621@SRX7054662@SRX7055007@SRX7054657@SRX7054666@SRX7054663@SRX7055006@SRX7054614@SRX7054611@SRX7054658@SRX2355085@SRX7054671@SRX7054615@SRX7055008@SRX2404136@SRX2404132@SRX7054618@SRX7054664@SRX2207671@SRX7054613@SRX2355079@SRX7054619@SRX7055004@SRX7054617@SRX5938177@SRX7054609@SRX2404135@SRX2355081@SRX7054659@SRX7055005@SRX…
TRUE	chr5	138629215	138629465	SIL1	47	chr5:138629052-138629419@chr5:138629059-138629585@chr5:138629076-138629410@chr5:138629076-138629531@chr5:138629077-138629519@chr5:138629078-138629462@chr5:138629078-138629534@chr5:138629082-138629637@chr5:138629093-138629421@chr5:138629094-138629501@chr5:138629094-138629544@chr5:138629096-138629613@chr5:138629097-138629422@chr5:138629108-138630055@chr5:138629109-138629429@chr5:138629112-138629462…	Cardiovascular@Cardiovascular@Cardiovascular@Cardiovascular@Cardiovascular@Cardiovascular@Cardiovascular@Cardiovascular@Cardiovascular@Cardiovascular@Cardiovascular@Cardiovascular@Cardiovascular@Digestive%20tract@Cardiovascular@Cardiovascular@Cardiovascular@Cardiovascular@Cardiovascular@Kidney@Cardiovascular@Cardiovascular@Cardiovascular@Cardiovascular@Cardiovascular@Cardiovascular@Cardiovascular…	SRX7054670@SRX7054661@SRX7055007@SRX2207673@SRX2207672@SRX7054666@SRX7054611@SRX7054671@SRX7054668@SRX7055006@SRX7054616@SRX7054614@SRX7054618@SRX359916@SRX7054617@SRX7054662@SRX7054669@SRX7054659@SRX7054609@SRX2055843@SRX7054657@SRX2355085@SRX7054615@SRX7054622@SRX7055004@SRX2355083@SRX7054619@SRX2355081@SRX2355078@SRX7054621@SRX7054664@SRX7054663@SRX7054672@SRX7054667@SRX2355079@SRX378804@SRX14…
FALSE	chr12	133463154	133465154	CHFR	47	chr12:133464127-133464552@chr12:133464133-133464501@chr12:133464146-133464465@chr12:133464151-133464342@chr12:133464151-133464767@chr12:133464160-133464437@chr12:133464165-133464549@chr12:133464166-133464478@chr12:133464171-133464592@chr12:133464178-133464492@chr12:133464182-133464473@chr12:133464183-133464436@chr12:133464183-133464476@chr12:133464184-133464524@chr12:133464185-133464791@chr12:133…	Cardiovascular@Cardiovascular@Cardiovascular@Cardiovascular@Cardiovascular@Blood@Cardiovascular@Cardiovascular@Cardiovascular@Cardiovascular@Cardiovascular@Cardiovascular@Cardiovascular@Cardiovascular@Cardiovascular@Cardiovascular@Cardiovascular@Cardiovascular@Cardiovascular@Cardiovascular@Cardiovascular@Cardiovascular@Cardiovascular@Cardiovascular@Cardiovascular@Cardiovascular@Cardiovascular@Car…	SRX7054671@SRX7054664@SRX2355081@SRX2355083@SRX2207673@SRX1460848@SRX7055007@SRX7055008@SRX7054666@SRX7054657@SRX7055006@SRX7054621@SRX7054667@SRX2355085@SRX2207672@SRX7054670@SRX7054622@SRX7054663@SRX7054614@SRX7054615@SRX7054611@SRX7054619@SRX2355078@SRX7054668@SRX7054616@SRX7054661@SRX7054662@SRX7054618@SRX5938177@SRX7054672@SRX7054617@SRX2355079@SRX7055004@SRX425264@SRX7054659@SRX017912@SRX15…
TRUE	chr15	66993073	66995073	SMAD6	47	chr15:66993220-66993393@chr15:66993281-66993467@chr15:66993288-66993652@chr15:66993311-66993418@chr15:66993311-66993627@chr15:66993352-66993634@chr15:66993355-66993625@chr15:66993384-66993612@chr15:66993457-66993618@chr15:66993459-66993644@chr15:66993475-66993658@chr15:66993506-66993618@chr15:66994372-66994670@chr15:66994381-66994704@chr15:66994403-66994693@chr15:66994417-66994728@chr15:66994421-…	Cardiovascular@Cardiovascular@Cardiovascular@Blood@Cardiovascular@Cardiovascular@Cardiovascular@Cardiovascular@Cardiovascular@Cardiovascular@Cardiovascular@Bone@Cardiovascular@Cardiovascular@Cardiovascular@Cardiovascular@Cardiovascular@Cardiovascular@Cardiovascular@Cardiovascular@Cardiovascular@Cardiovascular@Cardiovascular@Cardiovascular@Cardiovascular@Cardiovascular@Cardiovascular@Cardiovascula…	SRX7054670@SRX7054664@SRX2207672@SRX1460848@SRX2355085@SRX2355081@SRX2355078@SRX7054609@SRX7054667@SRX7054661@SRX7055007@SRX3638908@SRX2355079@SRX7054614@SRX7055007@SRX7054670@SRX7054618@SRX7054662@SRX7054616@SRX7055004@SRX7054611@SRX7054671@SRX7054615@SRX7054622@SRX7054668@SRX7054667@SRX7054666@SRX2207673@SRX7054621@SRX7054672@SRX7054659@SRX7054661@SRX7054664@SRX7055006@SRX2207672@SRX7055008@SRX…
FALSE	chr1	113246725	113248725	RHOC	47	chr1:113247381-113248114@chr1:113247394-113247887@chr1:113247394-113247906@chr1:113247472-113247812@chr1:113247475-113247869@chr1:113247491-113247927@chr1:113247498-113247897@chr1:113247500-113247912@chr1:113247501-113247884@chr1:113247504-113247929@chr1:113247509-113247936@chr1:113247521-113247806@chr1:113247523-113247964@chr1:113247523-113247992@chr1:113247525-113247825@chr1:113247525-113247919…	Others@Cardiovascular@Cardiovascular@Cardiovascular@Cardiovascular@Cardiovascular@Cardiovascular@Cardiovascular@Cardiovascular@Cardiovascular@Cardiovascular@Cardiovascular@Cardiovascular@Cardiovascular@Cardiovascular@Cardiovascular@Cardiovascular@Cardiovascular@Cardiovascular@Cardiovascular@Cardiovascular@Cardiovascular@Cardiovascular@Cardiovascular@Cardiovascular@Cardiovascular@Cardiovascular@Ca…	SRX5938177@SRX2207673@SRX2207672@SRX4947721@SRX7054657@SRX7054661@SRX7054614@SRX7055006@SRX7054622@SRX7054611@SRX7054618@SRX7054667@SRX7054666@SRX7054664@SRX7054615@SRX7054671@SRX7055007@SRX7054617@SRX7054662@SRX7054619@SRX7054616@SRX7054621@SRX7054609@SRX2355085@SRX7055004@SRX2355079@SRX7054668@SRX7054670@SRX7055008@SRX7054665@SRX7054659@SRX7054624@SRX2404140@SRX7054672@SRX7054613@SRX2207671@SRX…
FALSE	chr16	377390	377640	NME4	46	chr16:377114-377493@chr16:377114-377493@chr16:377151-377457@chr16:377151-377457@chr16:377239-377655@chr16:377239-377655@chr16:377253-377420@chr16:377253-377420@chr16:377259-377881@chr16:377259-377881@chr16:377262-377849@chr16:377262-377849@chr16:377277-377693@chr16:377277-377693@chr16:377281-377649@chr16:377281-377649@chr16:377328-377558@chr16:377328-377558@chr16:377332-377680@chr16:377332-377680…	Breast@Breast@Breast@Breast@Others@Others@Cardiovascular@Cardiovascular@Cardiovascular@Cardiovascular@Cardiovascular@Cardiovascular@Others@Others@Others@Others@Others@Others@Others@Others@Kidney@Kidney@Others@Others@Others@Others@Others@Others@Blood@Blood@Blood@Blood@Cardiovascular@Cardiovascular@Digestive%20tract@Digestive%20tract@Digestive%20tract@Digestive%20tract@Kidney@Kidney@Cardiovascular@…	SRX968971@SRX968971@SRX968977@SRX968977@SRX5938177@SRX5938177@SRX2355085@SRX2355085@SRX2207672@SRX2207672@SRX2207673@SRX2207673@SRX2404134@SRX2404134@SRX2404135@SRX2404135@SRX2404137@SRX2404137@SRX2404132@SRX2404132@SRX3636885@SRX3636885@SRX2404133@SRX2404133@SRX2404140@SRX2404140@SRX2404142@SRX2404142@SRX150605@SRX150605@SRX1460847@SRX1460847@SRX7054614@SRX7054614@SRX359916@SRX359916@SRX3102571@…
TRUE	chr10	134385486	134385736	INPP5A	46	chr10:134385358-134385579@chr10:134385373-134385621@chr10:134385451-134385645@chr10:134385455-134385622@chr10:134385461-134385875@chr10:134385474-134385806@chr10:134385490-134385737@chr10:134385491-134385832@chr10:134385498-134385830@chr10:134385505-134385737@chr10:134385506-134385824@chr10:134385509-134385785@chr10:134385512-134385756@chr10:134385516-134385696@chr10:134385516-134385725@chr10:134…	Blood@Blood@Blood@Blood@Cardiovascular@Cardiovascular@Blood@Cardiovascular@Cardiovascular@Blood@Cardiovascular@Blood@Cardiovascular@Blood@Blood@Cardiovascular@Cardiovascular@Cardiovascular@Blood@Others@Blood@Cardiovascular@Blood@Cardiovascular@Blood@Cardiovascular@Blood@Blood@Blood@Cardiovascular@Cardiovascular@Cardiovascular@Blood@Blood@Cardiovascular@Blood@Cardiovascular@Cardiovascular@Others@B…	SRX4401065@SRX4401064@SRX4401063@SRX4401061@SRX2207673@SRX7054657@SRX150605@SRX7054661@SRX2207672@SRX150359@SRX7054617@SRX150353@SRX7054609@SRX150610@SRX2837382@SRX7054666@SRX7054611@SRX7054614@SRX017913@SRX5938177@SRX017872@SRX7055007@SRX017859@SRX7054664@SRX017895@SRX7054671@SRX150606@SRX017871@SRX017912@SRX7055004@SRX7054618@SRX7054616@SRX150557@SRX017858@SRX7054619@SRX1460847@SRX7055006@SRX70…
FALSE	chr16	377390	377640	FAM234A	46	chr16:377114-377493@chr16:377114-377493@chr16:377151-377457@chr16:377151-377457@chr16:377239-377655@chr16:377239-377655@chr16:377253-377420@chr16:377253-377420@chr16:377259-377881@chr16:377259-377881@chr16:377262-377849@chr16:377262-377849@chr16:377277-377693@chr16:377277-377693@chr16:377281-377649@chr16:377281-377649@chr16:377328-377558@chr16:377328-377558@chr16:377332-377680@chr16:377332-377680…	Breast@Breast@Breast@Breast@Others@Others@Cardiovascular@Cardiovascular@Cardiovascular@Cardiovascular@Cardiovascular@Cardiovascular@Others@Others@Others@Others@Others@Others@Others@Others@Kidney@Kidney@Others@Others@Others@Others@Others@Others@Blood@Blood@Blood@Blood@Cardiovascular@Cardiovascular@Digestive%20tract@Digestive%20tract@Digestive%20tract@Digestive%20tract@Kidney@Kidney@Cardiovascular@…	SRX968971@SRX968971@SRX968977@SRX968977@SRX5938177@SRX5938177@SRX2355085@SRX2355085@SRX2207672@SRX2207672@SRX2207673@SRX2207673@SRX2404134@SRX2404134@SRX2404135@SRX2404135@SRX2404137@SRX2404137@SRX2404132@SRX2404132@SRX3636885@SRX3636885@SRX2404133@SRX2404133@SRX2404140@SRX2404140@SRX2404142@SRX2404142@SRX150605@SRX150605@SRX1460847@SRX1460847@SRX7054614@SRX7054614@SRX359916@SRX359916@SRX3102571@…
FALSE	chr1	183925776	183926026	TSEN15	46	chr1:183925785-183926105@chr1:183925828-183926088@chr1:183925828-183926186@chr1:183925834-183926067@chr1:183925838-183926030@chr1:183925840-183926060@chr1:183925840-183926085@chr1:183925842-183926201@chr1:183925844-183926065@chr1:183925854-183926121@chr1:183925859-183926024@chr1:183925859-183926087@chr1:183925861-183926063@chr1:183925864-183926051@chr1:183925866-183926026@chr1:183925867-183926109…	Blood@Blood@Cardiovascular@Blood@Blood@Blood@Blood@Cardiovascular@Blood@Cardiovascular@Blood@Blood@Blood@Blood@Blood@Cardiovascular@Cardiovascular@Cardiovascular@Blood@Cardiovascular@Cardiovascular@Blood@Cardiovascular@Blood@Cardiovascular@Cardiovascular@Cardiovascular@Cardiovascular@Cardiovascular@Cardiovascular@Cardiovascular@Cardiovascular@Cardiovascular@Cardiovascular@Cardiovascular@Cardiovas…	SRX150605@SRX150557@SRX7055006@SRX1460848@SRX4001967@SRX017913@SRX150606@SRX2207672@SRX150610@SRX7054616@SRX150608@SRX017912@SRX150353@SRX017895@SRX017891@SRX7054668@SRX7055004@SRX2207673@SRX150362@SRX7054611@SRX7054661@SRX1460847@SRX7055007@SRX017871@SRX7054666@SRX7054621@SRX7054670@SRX7054614@SRX7054664@SRX7054662@SRX7054617@SRX7054619@SRX7054671@SRX7054663@SRX7054657@SRX7054618@SRX150365@SRX70…
TRUE	chr10	115613690	115615690	NHLRC2	46	chr10:115613986-115614445@chr10:115613993-115614556@chr10:115613999-115614151@chr10:115614000-115615147@chr10:115614019-115614088@chr10:115614025-115614922@chr10:115614162-115614235@chr10:115614337-115614394@chr10:115614660-115614830@chr10:115614666-115615245@chr10:115614671-115615123@chr10:115614672-115615184@chr10:115614678-115615032@chr10:115614679-115615085@chr10:115614759-115615157@chr10:115…	Liver@Liver@Blood@Kidney@Liver@Digestive%20tract@Liver@Liver@Cardiovascular@Cardiovascular@Cardiovascular@Cardiovascular@Cardiovascular@Cardiovascular@Blood@Blood@Blood@Cardiovascular@Kidney@Cardiovascular@Cardiovascular@Cardiovascular@Cardiovascular@Cardiovascular@Cardiovascular@Cardiovascular@Blood@Cardiovascular@Adipocyte@Blood@Blood@Blood@Blood@Blood@Blood@Cardiovascular@Blood@Blood@Blood@Blo…	SRX2270128@SRX2270129@SRX150605@SRX2055843@SRX2270127@SRX359916@SRX2270127@SRX2270127@SRX7054615@SRX2207672@SRX7055007@SRX2207673@SRX7054671@SRX4947721@SRX2837382@SRX017911@SRX150605@SRX7054614@SRX3346352@SRX7054670@SRX2355079@SRX7054661@SRX294971@SRX2355083@SRX7054617@SRX2355085@SRX150353@SRX7054619@SRX813774@SRX150608@SRX017871@SRX150610@SRX4401064@SRX017878@SRX017895@SRX7054666@SRX017906@SRX01…
FALSE	chr3	185303330	185305330	SENP2	45	chr3:185303658-185304454@chr3:185303674-185304237@chr3:185303684-185304155@chr3:185303720-185304149@chr3:185303733-185304131@chr3:185303734-185304261@chr3:185303745-185304124@chr3:185303751-185304157@chr3:185303753-185304177@chr3:185303754-185304129@chr3:185303756-185304148@chr3:185303757-185304174@chr3:185303757-185304236@chr3:185303759-185304128@chr3:185303761-185304153@chr3:185303762-185304191…	Digestive%20tract@Cardiovascular@Cardiovascular@Cardiovascular@Cardiovascular@Cardiovascular@Cardiovascular@Cardiovascular@Cardiovascular@Cardiovascular@Cardiovascular@Blood@Cardiovascular@Cardiovascular@Cardiovascular@Others@Cardiovascular@Cardiovascular@Cardiovascular@Cardiovascular@Cardiovascular@Cardiovascular@Cardiovascular@Cardiovascular@Cardiovascular@Cardiovascular@Cardiovascular@Cardiova…	SRX359916@SRX7054661@SRX7054667@SRX2355078@SRX7054662@SRX7055006@SRX7054666@SRX7054618@SRX7054671@SRX2207673@SRX7054670@SRX1460848@SRX7054614@SRX2355085@SRX2355079@SRX5938177@SRX7054611@SRX2207672@SRX7054619@SRX7054668@SRX7054616@SRX7054622@SRX2355081@SRX7054657@SRX7054669@SRX7054621@SRX7055007@SRX7055008@SRX7055004@SRX7054615@SRX7054617@SRX7054664@SRX7054609@SRX7054672@SRX7054660@SRX2404140@SRX1…
TRUE	chr7	44083638	44085638	DBNL	45	chr7:44083841-44084689@chr7:44084036-44084176@chr7:44084039-44084349@chr7:44084044-44084283@chr7:44084059-44084306@chr7:44084065-44084445@chr7:44084071-44084413@chr7:44084075-44084205@chr7:44084076-44084220@chr7:44084086-44084436@chr7:44084086-44084536@chr7:44084087-44084336@chr7:44084095-44084379@chr7:44084099-44084182@chr7:44084101-44084393@chr7:44084102-44084335@chr7:44084103-44084473@chr7:440…	Digestive%20tract@Blood@Bone@Blood@Blood@Cardiovascular@Cardiovascular@Blood@Blood@Cardiovascular@Cardiovascular@Cardiovascular@Cardiovascular@Bone@Cardiovascular@Cardiovascular@Cardiovascular@Cardiovascular@Cardiovascular@Cardiovascular@Cardiovascular@Cardiovascular@Cardiovascular@Cardiovascular@Cardiovascular@Cardiovascular@Cardiovascular@Cardiovascular@Cardiovascular@Cardiovascular@Cardiovascu…	SRX359916@SRX150557@SRX3638907@SRX150605@SRX150608@SRX7054666@SRX2207673@SRX150365@SRX150606@SRX7055006@SRX7054671@SRX7054615@SRX7054670@SRX3638911@SRX2207672@SRX7054667@SRX7054619@SRX7054614@SRX2355078@SRX7054662@SRX7054663@SRX7054617@SRX7054622@SRX7054616@SRX7054618@SRX7054664@SRX7054609@SRX7054668@SRX7054657@SRX7054661@SRX7055007@SRX1460848@SRX7055008@SRX7054669@SRX2207671@SRX7055004@SRX705465…
TRUE	chr1	169085400	169085650	ATP1B1	44	chr1:169085232-169085536@chr1:169085236-169085729@chr1:169085249-169085733@chr1:169085255-169085738@chr1:169085261-169085662@chr1:169085268-169085780@chr1:169085270-169085542@chr1:169085271-169085412@chr1:169085272-169085527@chr1:169085286-169085690@chr1:169085286-169085719@chr1:169085289-169085729@chr1:169085295-169085706@chr1:169085298-169085766@chr1:169085306-169085739@chr1:169085313-169085709…	Blood@Others@Others@Others@Kidney@Kidney@Blood@Blood@Blood@Others@Others@Others@Others@Blood@Others@Kidney@Blood@Others@Blood@Others@Blood@Others@Liver@Others@Breast@Others@Blood@Blood@Cardiovascular@Cardiovascular@Blood@Lung@Cardiovascular@Cardiovascular@Blood@Blood@Breast@Blood@Blood@Blood@Liver@Blood@Blood@Blood	SRX4401064@SRX5938177@SRX2404135@SRX2404134@SRX3346352@SRX2055843@SRX4401063@SRX4401062@SRX4401065@SRX2404140@SRX2404132@SRX2404133@SRX2404142@SRX150605@SRX2404141@SRX3636885@SRX017859@SRX2404137@SRX150359@SRX2404136@SRX017912@SRX2404130@SRX2270129@SRX2404127@SRX968978@SRX2404139@SRX150353@SRX150365@SRX2355085@SRX7054666@SRX017913@SRX212183@SRX2355081@SRX2207672@SRX017883@SRX2837382@SRX968976@SRX…
FALSE	chr10	72124266	72124516	EIF4EBP2	44	chr10:72124094-72124517@chr10:72124095-72124507@chr10:72124096-72124464@chr10:72124103-72124446@chr10:72124112-72124484@chr10:72124116-72124425@chr10:72124119-72124467@chr10:72124121-72124432@chr10:72124143-72124426@chr10:72124143-72124471@chr10:72124145-72124451@chr10:72124146-72124425@chr10:72124149-72124392@chr10:72124151-72124429@chr10:72124153-72124369@chr10:72124157-72124450@chr10:72124158-…	Cardiovascular@Cardiovascular@Cardiovascular@Cardiovascular@Cardiovascular@Cardiovascular@Cardiovascular@Cardiovascular@Cardiovascular@Cardiovascular@Cardiovascular@Cardiovascular@Cardiovascular@Cardiovascular@Cardiovascular@Cardiovascular@Lung@Cardiovascular@Cardiovascular@Cardiovascular@Cardiovascular@Cardiovascular@Adipocyte@Cardiovascular@Cardiovascular@Adipocyte@Cardiovascular@Cardiovascular…	SRX7054661@SRX7054615@SRX7055007@SRX7054622@SRX7055006@SRX7055008@SRX7054671@SRX7054621@SRX7054611@SRX7054657@SRX7054666@SRX7054664@SRX7055005@SRX7054617@SRX7054663@SRX7054670@SRX212183@SRX7054614@SRX7054668@SRX7054667@SRX7055004@SRX7054662@SRX813773@SRX7054609@SRX2355079@SRX813772@SRX7054619@SRX7054616@SRX7054659@SRX2355085@SRX7054618@SRX017871@SRX150353@SRX2355081@SRX7054672@SRX150606@SRX150605…
FALSE	chr11	57546089	57546339	TMX2	44	chr11:57545961-57546360@chr11:57545972-57546338@chr11:57545979-57546371@chr11:57545983-57546347@chr11:57545988-57546306@chr11:57545992-57546308@chr11:57545992-57546335@chr11:57545999-57546234@chr11:57546000-57546356@chr11:57546001-57546360@chr11:57546009-57546350@chr11:57546010-57546336@chr11:57546011-57546286@chr11:57546013-57546347@chr11:57546014-57546309@chr11:57546014-57546329@chr11:57546016-…	Cardiovascular@Cardiovascular@Cardiovascular@Cardiovascular@Cardiovascular@Cardiovascular@Cardiovascular@Others@Cardiovascular@Cardiovascular@Cardiovascular@Cardiovascular@Cardiovascular@Cardiovascular@Cardiovascular@Cardiovascular@Cardiovascular@Cardiovascular@Cardiovascular@Cardiovascular@Cardiovascular@Cardiovascular@Cardiovascular@Cardiovascular@Cardiovascular@Cardiovascular@Cardiovascular@Ca…	SRX2207673@SRX7054617@SRX2207672@SRX7054661@SRX7054615@SRX7054616@SRX7054664@SRX5938177@SRX7055006@SRX7054614@SRX7054671@SRX7054619@SRX7054666@SRX7055007@SRX2355085@SRX7054618@SRX7054657@SRX7054670@SRX2355083@SRX7054662@SRX2355078@SRX7055005@SRX7054669@SRX7055008@SRX7054668@SRX7055004@SRX4947721@SRX7054659@SRX7054609@SRX7054620@SRX7054621@SRX7054611@SRX2207671@SRX7054663@SRX2404140@SRX7054665@SRX…
FALSE	chr4	2813798	2814048	TNIP2	44	chr4:2813721-2814106@chr4:2813731-2814094@chr4:2813734-2814100@chr4:2813737-2814170@chr4:2813741-2814062@chr4:2813754-2814105@chr4:2813758-2814092@chr4:2813762-2814086@chr4:2813764-2814170@chr4:2813767-2814006@chr4:2813768-2813929@chr4:2813768-2814139@chr4:2813777-2814109@chr4:2813782-2814152@chr4:2813786-2814166@chr4:2813792-2814110@chr4:2813794-2814167@chr4:2813795-2814089@chr4:2813797-2814036@…	Cardiovascular@Cardiovascular@Cardiovascular@Cardiovascular@Cardiovascular@Cardiovascular@Cardiovascular@Cardiovascular@Cardiovascular@Kidney@Cardiovascular@Cardiovascular@Cardiovascular@Cardiovascular@Cardiovascular@Cardiovascular@Cardiovascular@Cardiovascular@Cardiovascular@Cardiovascular@Cardiovascular@Cardiovascular@Cardiovascular@Cardiovascular@Blood@Blood@Cardiovascular@Cardiovascular@Cardi…	SRX2207673@SRX2207672@SRX7054664@SRX7054661@SRX7054670@SRX7054617@SRX7054609@SRX7055006@SRX4947721@SRX2055843@SRX2355078@SRX7055007@SRX7054666@SRX7054615@SRX7054614@SRX7054662@SRX7054671@SRX7055004@SRX7054610@SRX2355085@SRX7054611@SRX2207671@SRX7054616@SRX2355081@SRX1460848@SRX150610@SRX7054619@SRX7054663@SRX7054618@SRX7054665@SRX7054622@SRX150353@SRX7054657@SRX7054621@SRX7054668@SRX150557@SRX705…
FALSE	chr6	88441640	88441890	AKIRIN2	44	chr6:88441516-88441888@chr6:88441547-88441908@chr6:88441553-88441943@chr6:88441558-88441932@chr6:88441563-88441874@chr6:88441564-88441931@chr6:88441571-88441905@chr6:88441573-88441911@chr6:88441578-88441869@chr6:88441578-88441887@chr6:88441580-88441943@chr6:88441585-88441836@chr6:88441588-88441880@chr6:88441590-88441876@chr6:88441590-88441880@chr6:88441591-88441882@chr6:88441591-88442263@chr6:884…	Cardiovascular@Cardiovascular@Cardiovascular@Cardiovascular@Cardiovascular@Cardiovascular@Cardiovascular@Cardiovascular@Cardiovascular@Cardiovascular@Others@Cardiovascular@Cardiovascular@Others@Cardiovascular@Cardiovascular@Others@Cardiovascular@Cardiovascular@Cardiovascular@Cardiovascular@Cardiovascular@Cardiovascular@Cardiovascular@Cardiovascular@Cardiovascular@Adipocyte@Cardiovascular@Cardiova…	SRX7054617@SRX7054615@SRX7054661@SRX2207672@SRX7054669@SRX2207673@SRX7054619@SRX7055007@SRX7054609@SRX7054616@SRX2404140@SRX7055004@SRX7054614@SRX2404135@SRX7055006@SRX7054666@SRX5938177@SRX7054611@SRX7054671@SRX7055008@SRX7054667@SRX7054657@SRX7054668@SRX7054610@SRX7054670@SRX7054622@SRX813773@SRX7054663@SRX7054659@SRX7054618@SRX7054664@SRX2355079@SRX7054660@SRX7054672@SRX7054623@SRX7054621@SRX8…
TRUE	chr2	27356743	27358743	PREB	44	chr2:27357272-27357876@chr2:27357273-27357566@chr2:27357302-27357463@chr2:27357324-27357727@chr2:27357326-27357692@chr2:27357332-27357726@chr2:27357334-27357520@chr2:27357362-27357739@chr2:27357378-27357664@chr2:27357386-27357732@chr2:27357394-27357662@chr2:27357409-27357707@chr2:27357410-27357690@chr2:27357416-27357633@chr2:27357416-27357645@chr2:27357417-27357514@chr2:27357418-27357523@chr2:273…	Digestive%20tract@Cardiovascular@Cardiovascular@Uterus@Cardiovascular@Cardiovascular@Bone@Blood@Cardiovascular@Cardiovascular@Uterus@Cardiovascular@Cardiovascular@Uterus@Uterus@Uterus@Blood@Blood@Cardiovascular@Cardiovascular@Breast@Cardiovascular@Cardiovascular@Breast@Uterus@Breast@Cardiovascular@Cardiovascular@Uterus@Cardiovascular@Cardiovascular@Cardiovascular@Uterus@Cardiovascular@Cardiovascu…	SRX359916@SRX7054609@SRX7054667@SRX378804@SRX7054622@SRX7054671@SRX3638907@SRX150605@SRX7054657@SRX7054611@SRX378805@SRX7054614@SRX2207673@SRX027913@SRX027912@SRX027910@SRX150608@SRX1460848@SRX7054615@SRX7054670@SRX747789@SRX7054661@SRX2207672@SRX747790@SRX027915@SRX747783@SRX7054618@SRX7054668@SRX027911@SRX7054666@SRX7055004@SRX7054662@SRX027909@SRX2355085@SRX7054616@SRX027908@SRX2207671@SRX7054…
FALSE	chr8	124053813	124055813	DERL1	44	chr8:124053812-124054686@chr8:124053992-124054708@chr8:124054022-124054229@chr8:124054025-124054300@chr8:124054032-124054277@chr8:124054034-124054194@chr8:124054038-124054281@chr8:124054042-124054242@chr8:124054042-124054658@chr8:124054047-124054239@chr8:124054052-124054252@chr8:124054059-124054228@chr8:124054060-124054233@chr8:124054063-124054212@chr8:124054063-124054236@chr8:124054064-124054276…	Digestive%20tract@Kidney@Cardiovascular@Cardiovascular@Blood@Cardiovascular@Cardiovascular@Cardiovascular@Kidney@Breast@Breast@Blood@Breast@Cardiovascular@Cardiovascular@Cardiovascular@Cardiovascular@Cardiovascular@Blood@Breast@Blood@Cardiovascular@Cardiovascular@Cardiovascular@Others@Cardiovascular@Cardiovascular@Cardiovascular@Blood@Cardiovascular@Cardiovascular@Cardiovascular@Cardiovascular@Ca…	SRX359916@SRX2055843@SRX7054657@SRX2207672@SRX2837382@SRX7054621@SRX7055004@SRX7054671@SRX3636885@SRX747790@SRX747789@SRX1460848@SRX747783@SRX2355078@SRX7054615@SRX7054670@SRX2355085@SRX2207673@SRX4401061@SRX968976@SRX4401064@SRX7054614@SRX2207673@SRX7055006@SRX5938177@SRX7054619@SRX7054614@SRX7054661@SRX1460848@SRX7054618@SRX7055008@SRX7054621@SRX7054671@SRX7054615@SRX2207672@SRX4001967@SRX23550…
FALSE	chr19	12805755	12807755	FBXW9	44	chr19:12805997-12806165@chr19:12806004-12806180@chr19:12807135-12807784@chr19:12807169-12807643@chr19:12807284-12807713@chr19:12807294-12807671@chr19:12807295-12807631@chr19:12807331-12807531@chr19:12807337-12807667@chr19:12807343-12807660@chr19:12807350-12807597@chr19:12807351-12807573@chr19:12807353-12807510@chr19:12807357-12807565@chr19:12807358-12807662@chr19:12807359-12807647@chr19:12807363-…	Cardiovascular@Cardiovascular@Digestive%20tract@Cardiovascular@Cardiovascular@Cardiovascular@Cardiovascular@Cardiovascular@Cardiovascular@Cardiovascular@Cardiovascular@Cardiovascular@Cardiovascular@Blood@Cardiovascular@Cardiovascular@Blood@Cardiovascular@Cardiovascular@Cardiovascular@Cardiovascular@Cardiovascular@Blood@Blood@Cardiovascular@Blood@Cardiovascular@Cardiovascular@Blood@Blood@Cardiovas…	SRX2207673@SRX2207672@SRX359916@SRX7054661@SRX7054614@SRX7054671@SRX7054666@SRX2355078@SRX7054611@SRX7054615@SRX2207673@SRX7054617@SRX7054664@SRX150365@SRX2355085@SRX7054618@SRX1460848@SRX2207672@SRX7054621@SRX7054667@SRX7054619@SRX2207671@SRX150610@SRX150353@SRX2355079@SRX017895@SRX7055006@SRX7054622@SRX1460847@SRX150557@SRX7054670@SRX2355081@SRX150606@SRX150359@SRX7054668@SRX017906@SRX150608@SR…
TRUE	chr17	46102479	46102729	PNPO	43	chr17:46102417-46102795@chr17:46102423-46102788@chr17:46102423-46102800@chr17:46102426-46102747@chr17:46102432-46102545@chr17:46102432-46102704@chr17:46102433-46102825@chr17:46102434-46102749@chr17:46102440-46102780@chr17:46102441-46102771@chr17:46102445-46102756@chr17:46102446-46102674@chr17:46102446-46102784@chr17:46102446-46102785@chr17:46102450-46102779@chr17:46102472-46102795@chr17:46102477-…	Cardiovascular@Cardiovascular@Cardiovascular@Cardiovascular@Blood@Cardiovascular@Cardiovascular@Cardiovascular@Cardiovascular@Cardiovascular@Cardiovascular@Cardiovascular@Cardiovascular@Cardiovascular@Cardiovascular@Kidney@Cardiovascular@Cardiovascular@Cardiovascular@Cardiovascular@Cardiovascular@Cardiovascular@Blood@Cardiovascular@Cardiovascular@Blood@Cardiovascular@Blood@Cardiovascular@Blood@Ca…	SRX2207673@SRX7054614@SRX7054666@SRX7054657@SRX1460848@SRX7055006@SRX2207672@SRX7054611@SRX7054670@SRX7054618@SRX7054661@SRX7054622@SRX2355085@SRX2355078@SRX2355081@SRX2055843@SRX7054616@SRX7054662@SRX4947721@SRX7054668@SRX7054671@SRX7054621@SRX150605@SRX7054615@SRX2355079@SRX150608@SRX2355083@SRX150362@SRX7054619@SRX2837382@SRX7054664@SRX017871@SRX150353@SRX017912@SRX7055007@SRX150610@SRX7054659…
FALSE	chr22	38245272	38245522	MICALL1	42	chr22:38244986-38245898@chr22:38245127-38245651@chr22:38245162-38245633@chr22:38245195-38245518@chr22:38245202-38245496@chr22:38245202-38245638@chr22:38245206-38245371@chr22:38245213-38245550@chr22:38245214-38245490@chr22:38245216-38245600@chr22:38245217-38245499@chr22:38245220-38245532@chr22:38245223-38245331@chr22:38245228-38245466@chr22:38245229-38245497@chr22:38245230-38245408@chr22:38245236-…	Digestive%20tract@Cardiovascular@Cardiovascular@Bone@Blood@Cardiovascular@Blood@Blood@Cardiovascular@Cardiovascular@Cardiovascular@Cardiovascular@Bone@Cardiovascular@Cardiovascular@Blood@Cardiovascular@Cardiovascular@Cardiovascular@Cardiovascular@Cardiovascular@Cardiovascular@Cardiovascular@Cardiovascular@Cardiovascular@Blood@Blood@Blood@Cardiovascular@Uterus@Blood@Cardiovascular@Cardiovascular@C…	SRX359916@SRX7054614@SRX7054611@SRX3638907@SRX150605@SRX7054666@SRX017878@SRX150608@SRX7055007@SRX7054615@SRX2207672@SRX7054619@SRX3638909@SRX7054616@SRX2207673@SRX017912@SRX7054661@SRX7054618@SRX7054617@SRX7054621@SRX7054670@SRX7054663@SRX7054622@SRX7054657@SRX7054664@SRX017913@SRX150362@SRX150606@SRX2355078@SRX378805@SRX1460848@SRX7054671@SRX7055006@SRX7054668@SRX7054659@SRX378804@SRX7054609@SR…
FALSE	chr11	3399452	3401452	ZNF195	42	chr11:3399895-3400099@chr11:3400007-3400532@chr11:3400094-3400389@chr11:3400138-3400642@chr11:3400157-3400660@chr11:3400201-3400388@chr11:3400203-3400465@chr11:3400203-3400609@chr11:3400221-3400627@chr11:3400228-3400522@chr11:3400230-3400408@chr11:3400236-3400604@chr11:3400240-3400429@chr11:3400245-3400519@chr11:3400245-3400636@chr11:3400252-3400398@chr11:3400257-3400431@chr11:3400265-3400648@chr…	Cardiovascular@Digestive%20tract@Blood@Cardiovascular@Cardiovascular@Blood@Blood@Cardiovascular@Cardiovascular@Blood@Blood@Cardiovascular@Blood@Cardiovascular@Cardiovascular@Blood@Blood@Cardiovascular@Blood@Cardiovascular@Cardiovascular@Cardiovascular@Blood@Blood@Cardiovascular@Cardiovascular@Cardiovascular@Cardiovascular@Cardiovascular@Cardiovascular@Cardiovascular@Cardiovascular@Cardiovascular@…	SRX2207672@SRX359916@SRX017911@SRX7054614@SRX7054671@SRX017882@SRX150365@SRX2207673@SRX2207672@SRX150605@SRX150610@SRX7054661@SRX150608@SRX7054619@SRX7054666@SRX017878@SRX017912@SRX7054670@SRX150606@SRX7054615@SRX7054657@SRX7055007@SRX1460848@SRX017879@SRX7054618@SRX7054617@SRX2355085@SRX7054662@SRX7054611@SRX7054609@SRX7054622@SRX7054664@SRX7055006@SRX5938177@SRX7054668@SRX7054610@SRX2355081@SRX…
FALSE	chr14	58710522	58712522	PSMA3	42	chr14:58710386-58710598@chr14:58710574-58710770@chr14:58710581-58710776@chr14:58711267-58711751@chr14:58711301-58711658@chr14:58711302-58711407@chr14:58711324-58711674@chr14:58711340-58711496@chr14:58711354-58711510@chr14:58711359-58711625@chr14:58711366-58711667@chr14:58711367-58711965@chr14:58711376-58711719@chr14:58711379-58711646@chr14:58711388-58712016@chr14:58711391-58711631@chr14:58711392-…	Adipocyte@Cardiovascular@Cardiovascular@Blood@Cardiovascular@Bone@Others@Uterus@Uterus@Cardiovascular@Cardiovascular@Digestive%20tract@Cardiovascular@Cardiovascular@Cardiovascular@Cardiovascular@Cardiovascular@Blood@Cardiovascular@Cardiovascular@Cardiovascular@Cardiovascular@Cardiovascular@Cardiovascular@Cardiovascular@Cardiovascular@Cardiovascular@Cardiovascular@Cardiovascular@Cardiovascular@Car…	SRX813774@SRX2207672@SRX2207673@SRX150605@SRX7054661@SRX3638907@SRX5938177@SRX378805@SRX378804@SRX2355085@SRX7054618@SRX359916@SRX7055004@SRX7055007@SRX7054666@SRX4947721@SRX7054670@SRX1460848@SRX2355081@SRX2207672@SRX7054611@SRX7055006@SRX7054621@SRX2355078@SRX7054614@SRX7054671@SRX7054616@SRX7054668@SRX7054664@SRX7054622@SRX2207673@SRX150610@SRX150359@SRX150606@SRX150608@SRX3638907@SRX017912@SR…
FALSE	chr7	94261766	94262016	PEG10	41	chr7:94261694-94262030@chr7:94261701-94262091@chr7:94261708-94261985@chr7:94261714-94261994@chr7:94261714-94262083@chr7:94261727-94262054@chr7:94261736-94262074@chr7:94261741-94262080@chr7:94261745-94262142@chr7:94261749-94262088@chr7:94261750-94262052@chr7:94261751-94262031@chr7:94261751-94262066@chr7:94261752-94262039@chr7:94261752-94262096@chr7:94261754-94262059@chr7:94261754-94262099@chr7:942…	Others@Others@Cardiovascular@Cardiovascular@Cardiovascular@Cardiovascular@Cardiovascular@Cardiovascular@Cardiovascular@Cardiovascular@Others@Cardiovascular@Cardiovascular@Cardiovascular@Cardiovascular@Cardiovascular@Cardiovascular@Cardiovascular@Cardiovascular@Cardiovascular@Cardiovascular@Cardiovascular@Cardiovascular@Cardiovascular@Others@Cardiovascular@Cardiovascular@Cardiovascular@Cardiovascu…	SRX2404134@SRX2404140@SRX2355085@SRX2355079@SRX7054661@SRX7054611@SRX7054614@SRX7055006@SRX2207673@SRX7054666@SRX2404139@SRX7054618@SRX7054616@SRX7054609@SRX7054617@SRX7054670@SRX7055007@SRX7054622@SRX2207672@SRX7054667@SRX7054659@SRX7055004@SRX7054615@SRX7055005@SRX2404132@SRX7054657@SRX7054664@SRX7054662@SRX7054671@SRX7054663@SRX7054619@SRX7054621@SRX7055008@SRX7054668@SRX2404141@SRX7054612@SRX…
TRUE	chr10	131933888	131935888	GLRX3	41	chr10:131934323-131934698@chr10:131934443-131934813@chr10:131934456-131934867@chr10:131934475-131934741@chr10:131934477-131934872@chr10:131934481-131934770@chr10:131934481-131934795@chr10:131934483-131934746@chr10:131934491-131934724@chr10:131934491-131934832@chr10:131934491-131934898@chr10:131934496-131934730@chr10:131934496-131934798@chr10:131934499-131934837@chr10:131934504-131934683@chr10:131…	Digestive%20tract@Cardiovascular@Blood@Cardiovascular@Cardiovascular@Cardiovascular@Cardiovascular@Cardiovascular@Cardiovascular@Cardiovascular@Blood@Cardiovascular@Kidney@Cardiovascular@Cardiovascular@Uterus@Cardiovascular@Blood@Cardiovascular@Cardiovascular@Uterus@Kidney@Cardiovascular@Blood@Cardiovascular@Cardiovascular@Cardiovascular@Cardiovascular@Cardiovascular@Cardiovascular@Cardiovascular…	SRX359916@SRX7054671@SRX150605@SRX2207672@SRX7054661@SRX7054619@SRX7054670@SRX7055004@SRX7055006@SRX7054666@SRX017911@SRX7055007@SRX2055843@SRX7054615@SRX7055008@SRX378804@SRX7054616@SRX150362@SRX2355085@SRX2207673@SRX378805@SRX3636885@SRX7054614@SRX1460847@SRX7054609@SRX7054617@SRX7054668@SRX7054659@SRX7054621@SRX2355081@SRX7054657@SRX2355078@SRX2270128@SRX7054662@SRX1460848@SRX150365@SRX150608@…
FALSE	chr19	50370526	50370776	AKT1S1	40	chr19:50370271-50370942@chr19:50370479-50371000@chr19:50370490-50370973@chr19:50370501-50370930@chr19:50370505-50370707@chr19:50370509-50370945@chr19:50370511-50370949@chr19:50370512-50370961@chr19:50370515-50370948@chr19:50370515-50370988@chr19:50370521-50371023@chr19:50370524-50370925@chr19:50370528-50371036@chr19:50370538-50371009@chr19:50370542-50370975@chr19:50370544-50371033@chr19:50370548-…	Digestive%20tract@Cardiovascular@Cardiovascular@Cardiovascular@Cardiovascular@Cardiovascular@Cardiovascular@Cardiovascular@Cardiovascular@Cardiovascular@Cardiovascular@Cardiovascular@Cardiovascular@Cardiovascular@Cardiovascular@Cardiovascular@Cardiovascular@Cardiovascular@Cardiovascular@Cardiovascular@Cardiovascular@Cardiovascular@Cardiovascular@Cardiovascular@Cardiovascular@Cardiovascular@Cardio…	SRX359916@SRX2207672@SRX7054661@SRX4947721@SRX7055004@SRX7055007@SRX2355081@SRX7054617@SRX2355085@SRX7054670@SRX7054614@SRX2355078@SRX2207673@SRX7054664@SRX7054666@SRX7055006@SRX7054618@SRX7054668@SRX7054611@SRX7054616@SRX7054615@SRX2355079@SRX7054662@SRX7055005@SRX7054671@SRX7054619@SRX2355083@SRX7055008@SRX7054665@SRX4947720@SRX112016@SRX7054621@SRX7054667@SRX7054660@SRX7054657@SRX150365@SRX705…
FALSE	chr11	78130481	78130731	GAB2	40	chr11:78130389-78130644@chr11:78130393-78130649@chr11:78130397-78130729@chr11:78130401-78130798@chr11:78130417-78130743@chr11:78130424-78130781@chr11:78130425-78130724@chr11:78130428-78130788@chr11:78130430-78130754@chr11:78130432-78130771@chr11:78130436-78130760@chr11:78130436-78130805@chr11:78130438-78130759@chr11:78130438-78130779@chr11:78130439-78130712@chr11:78130441-78130717@chr11:78130443-…	Cardiovascular@Cardiovascular@Cardiovascular@Cardiovascular@Cardiovascular@Cardiovascular@Cardiovascular@Cardiovascular@Cardiovascular@Cardiovascular@Cardiovascular@Cardiovascular@Cardiovascular@Cardiovascular@Cardiovascular@Cardiovascular@Cardiovascular@Cardiovascular@Cardiovascular@Cardiovascular@Cardiovascular@Cardiovascular@Cardiovascular@Cardiovascular@Cardiovascular@Cardiovascular@Cardiovas…	SRX2207672@SRX2207673@SRX7054657@SRX7054661@SRX7054670@SRX7055007@SRX7054616@SRX7055006@SRX7054617@SRX7054614@SRX7054671@SRX7054666@SRX7054611@SRX7054621@SRX7054618@SRX7054667@SRX7055008@SRX7054664@SRX2355085@SRX7054622@SRX7054668@SRX2355083@SRX7054615@SRX7054663@SRX7055005@SRX7054609@SRX7054662@SRX7055004@SRX2355081@SRX7054659@SRX212183@SRX813773@SRX7054619@SRX7054660@SRX7054613@SRX7054669@SRX70…
TRUE	chr7	87555859	87556109	DBF4	40	chr7:87555887-87556401@chr7:87555918-87556310@chr7:87555925-87556329@chr7:87555930-87556222@chr7:87555931-87556329@chr7:87555932-87556268@chr7:87555936-87556233@chr7:87555938-87556265@chr7:87555938-87556275@chr7:87555943-87556466@chr7:87555945-87556262@chr7:87555948-87556442@chr7:87555948-87556481@chr7:87555950-87556316@chr7:87555954-87556271@chr7:87555955-87556252@chr7:87555958-87556175@chr7:875…	Blood@Blood@Blood@Blood@Blood@Blood@Blood@Blood@Blood@Blood@Blood@Blood@Blood@Blood@Blood@Kidney@Blood@Blood@Blood@Blood@Blood@Blood@Blood@Blood@Digestive%20tract@Blood@Blood@Blood@Blood@Others@Blood@Blood@Blood@Blood@Blood@Cardiovascular@Blood@Blood@Blood@Blood	SRX150605@SRX017912@SRX017913@SRX017867@SRX2837382@SRX150362@SRX017897@SRX017891@SRX150606@SRX150353@SRX150608@SRX150359@SRX150610@SRX150557@SRX017906@SRX2055843@SRX017879@SRX017859@SRX017865@SRX150365@SRX017907@SRX017871@SRX4401064@SRX017884@SRX3102571@SRX017911@SRX017870@SRX4401063@SRX017883@SRX5938177@SRX017895@SRX017858@SRX017878@SRX017877@SRX017872@SRX2207672@SRX017860@SRX017908@SRX150361@SR…
TRUE	chr3	15847335	15847585	ANKRD28	38	chr3:15847217-15847665@chr3:15847224-15847680@chr3:15847254-15847550@chr3:15847276-15847462@chr3:15847278-15847591@chr3:15847280-15847502@chr3:15847303-15847580@chr3:15847306-15847612@chr3:15847309-15847551@chr3:15847318-15847586@chr3:15847324-15847532@chr3:15847325-15847572@chr3:15847325-15847613@chr3:15847327-15847505@chr3:15847327-15847618@chr3:15847330-15847569@chr3:15847333-15847521@chr3:158…	Cardiovascular@Cardiovascular@Lung@Cardiovascular@Cardiovascular@Lung@Cardiovascular@Cardiovascular@Cardiovascular@Blood@Cardiovascular@Cardiovascular@Cardiovascular@Cardiovascular@Blood@Cardiovascular@Cardiovascular@Blood@Cardiovascular@Cardiovascular@Blood@Blood@Blood@Blood@Cardiovascular@Cardiovascular@Blood@Blood@Blood@Cardiovascular@Cardiovascular@Blood@Cardiovascular@Cardiovascular@Blood@Bl…	SRX2207672@SRX2207673@SRX1672130@SRX2355085@SRX7055007@SRX1672129@SRX7054663@SRX7054661@SRX7055004@SRX2837382@SRX2355079@SRX7054611@SRX7054666@SRX7054622@SRX150557@SRX7054615@SRX7055008@SRX150605@SRX7054616@SRX7054662@SRX017905@SRX150353@SRX017906@SRX150606@SRX7054614@SRX7054671@SRX150362@SRX017865@SRX150365@SRX7055006@SRX7054618@SRX4001967@SRX7054617@SRX7054664@SRX017912@SRX017908@SRX7054619@SRX…
FALSE	chr11	32158854	32159104	RCN1	38	chr11:32158761-32159231@chr11:32158769-32159195@chr11:32158772-32159222@chr11:32158780-32159170@chr11:32158784-32159135@chr11:32158789-32159188@chr11:32158790-32159203@chr11:32158797-32159199@chr11:32158803-32159189@chr11:32158805-32159199@chr11:32158807-32159192@chr11:32158810-32159195@chr11:32158818-32159203@chr11:32158819-32159113@chr11:32158822-32159161@chr11:32158830-32159148@chr11:32158831-…	Cardiovascular@Cardiovascular@Cardiovascular@Cardiovascular@Cardiovascular@Cardiovascular@Cardiovascular@Cardiovascular@Cardiovascular@Cardiovascular@Cardiovascular@Cardiovascular@Cardiovascular@Cardiovascular@Cardiovascular@Cardiovascular@Cardiovascular@Cardiovascular@Cardiovascular@Cardiovascular@Cardiovascular@Cardiovascular@Cardiovascular@Cardiovascular@Cardiovascular@Cardiovascular@Cardiovas…	SRX7055007@SRX2207673@SRX7054615@SRX7054614@SRX7054658@SRX7055006@SRX7054611@SRX7054671@SRX2207672@SRX7054657@SRX7054666@SRX7054617@SRX7054661@SRX2355079@SRX7055008@SRX7054622@SRX7054621@SRX7054619@SRX7054660@SRX7054663@SRX7054618@SRX7054670@SRX7055004@SRX7054609@SRX7054668@SRX7054610@SRX7054612@SRX7054667@SRX7054664@SRX7054665@SRX7054659@SRX7054616@SRX7054669@SRX7055005@SRX212183@SRX2355085@SRX7…
FALSE	chr11	14358614	14358864	RRAS2	38	chr11:14358639-14358913@chr11:14358647-14358960@chr11:14358649-14358965@chr11:14358651-14358997@chr11:14358653-14358957@chr11:14358655-14358984@chr11:14358656-14359001@chr11:14358656-14359010@chr11:14358658-14359035@chr11:14358662-14358989@chr11:14358664-14358923@chr11:14358667-14358924@chr11:14358668-14358985@chr11:14358670-14358951@chr11:14358670-14358991@chr11:14358672-14358890@chr11:14358683-…	Cardiovascular@Cardiovascular@Cardiovascular@Cardiovascular@Cardiovascular@Cardiovascular@Cardiovascular@Cardiovascular@Cardiovascular@Cardiovascular@Cardiovascular@Cardiovascular@Cardiovascular@Cardiovascular@Cardiovascular@Cardiovascular@Cardiovascular@Others@Cardiovascular@Cardiovascular@Cardiovascular@Cardiovascular@Cardiovascular@Cardiovascular@Others@Cardiovascular@Cardiovascular@Cardiovasc…	SRX7054668@SRX7054657@SRX7054666@SRX7054661@SRX7054614@SRX7054611@SRX7054617@SRX7054618@SRX7054671@SRX7055006@SRX7054619@SRX7054669@SRX7054616@SRX7054662@SRX7054615@SRX7054660@SRX7055007@SRX5938177@SRX7055004@SRX7054667@SRX7054664@SRX7054609@SRX7054670@SRX2355079@SRX2404135@SRX7055008@SRX2207672@SRX2207673@SRX7054622@SRX7054621@SRX7054659@SRX2355083@SRX2355081@SRX2404134@SRX212183@SRX7055005@SRX7…
FALSE	chr18	48738107	48738357	MEX3C	38	chr18:48737928-48738308@chr18:48737943-48738279@chr18:48737947-48738229@chr18:48737950-48738295@chr18:48737950-48738310@chr18:48737952-48738274@chr18:48737965-48738280@chr18:48737967-48738265@chr18:48737968-48738292@chr18:48737969-48738254@chr18:48737972-48738222@chr18:48737972-48738254@chr18:48737980-48738235@chr18:48737985-48738246@chr18:48737985-48738296@chr18:48737989-48738278@chr18:48737991-…	Cardiovascular@Cardiovascular@Cardiovascular@Cardiovascular@Cardiovascular@Cardiovascular@Cardiovascular@Cardiovascular@Cardiovascular@Cardiovascular@Cardiovascular@Cardiovascular@Cardiovascular@Cardiovascular@Blood@Cardiovascular@Cardiovascular@Cardiovascular@Cardiovascular@Cardiovascular@Cardiovascular@Cardiovascular@Cardiovascular@Cardiovascular@Cardiovascular@Cardiovascular@Cardiovascular@Car…	SRX2207672@SRX7055007@SRX7054668@SRX7054661@SRX2207673@SRX7054666@SRX7054671@SRX7054663@SRX7054615@SRX7054614@SRX7054619@SRX7054616@SRX7054662@SRX7054664@SRX4001967@SRX7055006@SRX7054611@SRX7055005@SRX7054617@SRX7054609@SRX7055004@SRX7054657@SRX7054672@SRX7054618@SRX7054669@SRX7054659@SRX7055008@SRX7054622@SRX7054621@SRX7054670@SRX150557@SRX150362@SRX017906@SRX2355079@SRX2355081@SRX150605@SRX1506…
FALSE	chr10	89291933	89292183	MINPP1	37	chr10:89291853-89292337@chr10:89291865-89292376@chr10:89291891-89292386@chr10:89291899-89292379@chr10:89291910-89292342@chr10:89291910-89292405@chr10:89291912-89292359@chr10:89291917-89292374@chr10:89291921-89292397@chr10:89291925-89292384@chr10:89291926-89292340@chr10:89291936-89292345@chr10:89291937-89292373@chr10:89291938-89292367@chr10:89291941-89292282@chr10:89291945-89292102@chr10:89291946-…	Cardiovascular@Cardiovascular@Cardiovascular@Cardiovascular@Cardiovascular@Cardiovascular@Cardiovascular@Cardiovascular@Cardiovascular@Cardiovascular@Cardiovascular@Cardiovascular@Cardiovascular@Cardiovascular@Cardiovascular@Cardiovascular@Cardiovascular@Cardiovascular@Cardiovascular@Cardiovascular@Cardiovascular@Cardiovascular@Cardiovascular@Cardiovascular@Cardiovascular@Cardiovascular@Cardiovas…	SRX7054663@SRX7054657@SRX2207672@SRX7054666@SRX7054616@SRX7055006@SRX7054670@SRX7054615@SRX7054661@SRX7054671@SRX7054662@SRX7054622@SRX7054611@SRX7054614@SRX7054618@SRX2355078@SRX7055007@SRX7055004@SRX7054621@SRX7054617@SRX7054667@SRX7054664@SRX2207673@SRX7054672@SRX7054619@SRX2355079@SRX7055005@SRX7054668@SRX7054609@SRX2355083@SRX7055008@SRX7054660@SRX2355085@SRX7054659@SRX7054658@SRX2207671@SRX…
FALSE	chr17	80230168	80232168	CSNK1D	37	chr17:80231002-80231267@chr17:80231103-80231553@chr17:80231158-80231618@chr17:80231188-80231608@chr17:80231220-80231545@chr17:80231251-80231461@chr17:80231273-80231622@chr17:80231276-80231574@chr17:80231289-80231477@chr17:80231294-80231545@chr17:80231295-80231532@chr17:80231298-80231559@chr17:80231308-80231561@chr17:80231312-80231573@chr17:80231328-80231562@chr17:80231329-80231511@chr17:80231330-…	Cardiovascular@Cardiovascular@Cardiovascular@Cardiovascular@Cardiovascular@Cardiovascular@Cardiovascular@Cardiovascular@Cardiovascular@Cardiovascular@Cardiovascular@Cardiovascular@Cardiovascular@Cardiovascular@Cardiovascular@Cardiovascular@Cardiovascular@Cardiovascular@Cardiovascular@Cardiovascular@Cardiovascular@Blood@Cardiovascular@Cardiovascular@Cardiovascular@Kidney@Blood@Cardiovascular@Kidne…	SRX7054666@SRX7055007@SRX7054671@SRX7054661@SRX7054657@SRX7054662@SRX7054614@SRX7054618@SRX7054668@SRX7054616@SRX7054665@SRX7054621@SRX7054611@SRX7054619@SRX7055006@SRX7054615@SRX7054666@SRX7054664@SRX2355079@SRX2207673@SRX7054667@SRX150605@SRX7054617@SRX7054622@SRX7054620@SRX3636885@SRX150606@SRX7054670@SRX2055843@SRX2207672@SRX150365@SRX2270129@SRX2270128@SRX150608@SRX150353@SRX2355085@SRX23550…
FALSE	chr20	47545566	47545816	ARFGEF2	36	chr20:47545515-47545803@chr20:47545525-47545776@chr20:47545528-47545829@chr20:47545529-47545800@chr20:47545533-47545819@chr20:47545538-47545821@chr20:47545541-47545793@chr20:47545545-47545815@chr20:47545547-47545810@chr20:47545548-47545799@chr20:47545549-47545804@chr20:47545551-47545793@chr20:47545551-47545796@chr20:47545554-47545790@chr20:47545554-47545830@chr20:47545555-47545782@chr20:47545557-…	Cardiovascular@Cardiovascular@Cardiovascular@Cardiovascular@Cardiovascular@Cardiovascular@Cardiovascular@Cardiovascular@Cardiovascular@Cardiovascular@Cardiovascular@Cardiovascular@Cardiovascular@Cardiovascular@Cardiovascular@Cardiovascular@Cardiovascular@Cardiovascular@Cardiovascular@Cardiovascular@Cardiovascular@Cardiovascular@Cardiovascular@Cardiovascular@Cardiovascular@Cardiovascular@Cardiovas…	SRX7054671@SRX7054664@SRX2355079@SRX7054614@SRX7054661@SRX2207672@SRX7055004@SRX7054611@SRX2355085@SRX7054621@SRX7055007@SRX7054617@SRX7055008@SRX7054662@SRX2207673@SRX7054663@SRX7054618@SRX7054619@SRX7054667@SRX7054670@SRX7054666@SRX7054657@SRX7054624@SRX7054616@SRX7054659@SRX7054615@SRX7054623@SRX7054609@SRX7055006@SRX7054658@SRX7054622@SRX2355081@SRX2355078@SRX7054672@SRX7054612@SRX7054668
FALSE	chr20	23073008	23073258	THBD	36	chr20:23073029-23073825@chr20:23073031-23073842@chr20:23073046-23073261@chr20:23073051-23073307@chr20:23073051-23073307@chr20:23073053-23073377@chr20:23073055-23073330@chr20:23073055-23073331@chr20:23073058-23073323@chr20:23073065-23073369@chr20:23073069-23073274@chr20:23073069-23073306@chr20:23073071-23073292@chr20:23073072-23073339@chr20:23073073-23073781@chr20:23073074-23073772@chr20:23073074-…	Cardiovascular@Cardiovascular@Cardiovascular@Cardiovascular@Cardiovascular@Cardiovascular@Cardiovascular@Cardiovascular@Cardiovascular@Cardiovascular@Cardiovascular@Cardiovascular@Cardiovascular@Cardiovascular@Cardiovascular@Cardiovascular@Cardiovascular@Cardiovascular@Cardiovascular@Cardiovascular@Cardiovascular@Cardiovascular@Cardiovascular@Cardiovascular@Cardiovascular@Cardiovascular@Cardiovas…	SRX2207672@SRX2207673@SRX7054667@SRX7054615@SRX7054616@SRX7055007@SRX7054661@SRX425263@SRX7054614@SRX7054619@SRX7054668@SRX7054663@SRX7054664@SRX7054671@SRX7054617@SRX7054666@SRX7054657@SRX7055005@SRX7055004@SRX7054658@SRX425264@SRX7054611@SRX7054618@SRX7054621@SRX7055008@SRX7054609@SRX2355083@SRX7054662@SRX968971@SRX7054613@SRX7054624@SRX2207671@SRX7054622@SRX7055006@SRX7054623@SRX7054672
FALSE	chr15	59980283	59982283	BNIP2	36	chr15:59980190-59980359@chr15:59980977-59982092@chr15:59981268-59981651@chr15:59981379-59981533@chr15:59981415-59981757@chr15:59981435-59981801@chr15:59981436-59981727@chr15:59981439-59981742@chr15:59981448-59981792@chr15:59981452-59981808@chr15:59981457-59981734@chr15:59981462-59981748@chr15:59981463-59981771@chr15:59981463-59981787@chr15:59981464-59981774@chr15:59981468-59981711@chr15:59981472-…	Cardiovascular@Digestive%20tract@Kidney@Liver@Cardiovascular@Cardiovascular@Cardiovascular@Cardiovascular@Cardiovascular@Cardiovascular@Cardiovascular@Cardiovascular@Cardiovascular@Cardiovascular@Blood@Cardiovascular@Cardiovascular@Cardiovascular@Cardiovascular@Cardiovascular@Cardiovascular@Cardiovascular@Cardiovascular@Cardiovascular@Cardiovascular@Others@Cardiovascular@Cardiovascular@Cardiovasc…	SRX2207673@SRX359916@SRX2055843@SRX2270129@SRX4947721@SRX7054661@SRX7054621@SRX7054622@SRX7054670@SRX7054671@SRX7054611@SRX2207672@SRX7055007@SRX2355085@SRX1460848@SRX7054657@SRX7055006@SRX7054614@SRX7054664@SRX2355081@SRX7054618@SRX2355078@SRX7054616@SRX7054666@SRX2207673@SRX5938177@SRX2355083@SRX7054619@SRX7054662@SRX1460847@SRX7054668@SRX7054615@SRX4401064@SRX112016@SRX4947720@SRX378804
FALSE	chr16	4896531	4898531	UBN1	36	chr16:4896542-4896788@chr16:4896940-4897505@chr16:4897099-4897500@chr16:4897110-4897246@chr16:4897137-4897306@chr16:4897139-4897464@chr16:4897154-4897387@chr16:4897157-4897501@chr16:4897171-4897312@chr16:4897173-4897273@chr16:4897184-4897420@chr16:4897196-4897344@chr16:4897198-4897675@chr16:4897202-4897534@chr16:4897207-4897446@chr16:4897208-4897461@chr16:4897221-4897424@chr16:4897221-4897481@chr…	Cardiovascular@Digestive%20tract@Cardiovascular@Liver@Bone@Cardiovascular@Cardiovascular@Cardiovascular@Blood@Bone@Cardiovascular@Blood@Blood@Cardiovascular@Cardiovascular@Cardiovascular@Blood@Cardiovascular@Cardiovascular@Cardiovascular@Cardiovascular@Cardiovascular@Cardiovascular@Cardiovascular@Cardiovascular@Cardiovascular@Cardiovascular@Cardiovascular@Cardiovascular@Cardiovascular@Cardiovascu…	SRX7054661@SRX359916@SRX7054666@SRX2270129@SRX3638911@SRX7054614@SRX7055007@SRX7054671@SRX150365@SRX3638907@SRX7054664@SRX150608@SRX1460848@SRX7054667@SRX2207673@SRX7054611@SRX150605@SRX7054661@SRX7054619@SRX2355085@SRX7054668@SRX7055006@SRX7054618@SRX7054615@SRX2355081@SRX7055004@SRX2355078@SRX2207672@SRX7054657@SRX7054621@SRX7054670@SRX4401064@SRX7054622@SRX2355079@SRX4947721@SRX3638907
FALSE	chr16	4896539	4898539	GLYR1	36	chr16:4896542-4896788@chr16:4896940-4897505@chr16:4897099-4897500@chr16:4897110-4897246@chr16:4897137-4897306@chr16:4897139-4897464@chr16:4897154-4897387@chr16:4897157-4897501@chr16:4897171-4897312@chr16:4897173-4897273@chr16:4897184-4897420@chr16:4897196-4897344@chr16:4897198-4897675@chr16:4897202-4897534@chr16:4897207-4897446@chr16:4897208-4897461@chr16:4897221-4897424@chr16:4897221-4897481@chr…	Cardiovascular@Digestive%20tract@Cardiovascular@Liver@Bone@Cardiovascular@Cardiovascular@Cardiovascular@Blood@Bone@Cardiovascular@Blood@Blood@Cardiovascular@Cardiovascular@Cardiovascular@Blood@Cardiovascular@Cardiovascular@Cardiovascular@Cardiovascular@Cardiovascular@Cardiovascular@Cardiovascular@Cardiovascular@Cardiovascular@Cardiovascular@Cardiovascular@Cardiovascular@Cardiovascular@Cardiovascu…	SRX7054661@SRX359916@SRX7054666@SRX2270129@SRX3638911@SRX7054614@SRX7055007@SRX7054671@SRX150365@SRX3638907@SRX7054664@SRX150608@SRX1460848@SRX7054667@SRX2207673@SRX7054611@SRX150605@SRX7054661@SRX7054619@SRX2355085@SRX7054668@SRX7055006@SRX7054618@SRX7054615@SRX2355081@SRX7055004@SRX2355078@SRX2207672@SRX7054657@SRX7054621@SRX7054670@SRX4401064@SRX7054622@SRX2355079@SRX4947721@SRX3638907
TRUE	chr2	214148402	214150402	SPAG16	36	chr2:214148811-214149026@chr2:214148821-214148936@chr2:214148833-214149241@chr2:214148868-214149220@chr2:214148874-214149163@chr2:214148905-214149203@chr2:214148918-214149219@chr2:214148920-214149102@chr2:214148921-214149147@chr2:214148926-214149181@chr2:214148927-214149169@chr2:214148932-214149149@chr2:214148935-214149196@chr2:214148937-214149170@chr2:214148939-214149181@chr2:214148941-214149207…	Blood@Blood@Blood@Cardiovascular@Blood@Cardiovascular@Cardiovascular@Cardiovascular@Cardiovascular@Blood@Cardiovascular@Cardiovascular@Cardiovascular@Cardiovascular@Cardiovascular@Cardiovascular@Kidney@Cardiovascular@Digestive%20tract@Cardiovascular@Cardiovascular@Cardiovascular@Cardiovascular@Cardiovascular@Cardiovascular@Cardiovascular@Blood@Cardiovascular@Blood@Cardiovascular@Cardiovascular@Bl…	SRX150610@SRX150362@SRX150608@SRX7055007@SRX017895@SRX2207673@SRX2207672@SRX7054666@SRX7055008@SRX150605@SRX7054661@SRX7054615@SRX7054609@SRX4947721@SRX7054618@SRX7054616@SRX2055843@SRX7054621@SRX359916@SRX7054614@SRX7054670@SRX7054671@SRX2355085@SRX2355078@SRX7054617@SRX7054664@SRX1460848@SRX7055006@SRX150353@SRX7054611@SRX7055004@SRX2837382@SRX2355083@SRX150359@SRX7054658@SRX7054622
TRUE	chr8	145149237	145151237	CYC1	36	chr8:145149600-145149838@chr8:145149645-145150041@chr8:145149649-145149921@chr8:145149660-145150002@chr8:145149685-145149855@chr8:145149700-145149916@chr8:145149701-145150032@chr8:145149702-145149873@chr8:145149706-145150036@chr8:145149723-145149887@chr8:145149732-145150005@chr8:145149751-145150022@chr8:145149827-145150034@chr8:145149840-145150027@chr8:145149847-145150533@chr8:145149892-145150028…	Cardiovascular@Cardiovascular@Cardiovascular@Cardiovascular@Cardiovascular@Cardiovascular@Cardiovascular@Cardiovascular@Cardiovascular@Cardiovascular@Cardiovascular@Cardiovascular@Cardiovascular@Cardiovascular@Kidney@Cardiovascular@Kidney@Blood@Blood@Blood@Cardiovascular@Blood@Bone@Kidney@Cardiovascular@Cardiovascular@Cardiovascular@Cardiovascular@Cardiovascular@Cardiovascular@Cardiovascular@Bloo…	SRX7054661@SRX7054614@SRX7054622@SRX7054671@SRX7054616@SRX7054618@SRX2355085@SRX7054662@SRX2355078@SRX7054668@SRX2355081@SRX7055007@SRX2355083@SRX7054664@SRX2055843@SRX7054672@SRX3346352@SRX1460848@SRX017911@SRX150608@SRX2355079@SRX150605@SRX3638907@SRX3636885@SRX2207672@SRX7055007@SRX2207673@SRX2355085@SRX2355083@SRX7054619@SRX7054670@SRX2837382@SRX968976@SRX4947721@SRX813774@SRX150610
FALSE	chr16	14723991	14724241	BFAR	35	chr16:14723770-14724200@chr16:14723938-14724117@chr16:14723963-14724268@chr16:14723969-14724198@chr16:14723977-14724382@chr16:14723979-14724117@chr16:14723987-14724172@chr16:14723991-14724223@chr16:14723996-14724334@chr16:14723999-14724263@chr16:14724000-14724154@chr16:14724001-14724191@chr16:14724001-14724219@chr16:14724003-14724205@chr16:14724003-14724274@chr16:14724004-14724181@chr16:14724011-…	Digestive%20tract@Blood@Cardiovascular@Cardiovascular@Cardiovascular@Blood@Cardiovascular@Cardiovascular@Cardiovascular@Cardiovascular@Cardiovascular@Cardiovascular@Blood@Cardiovascular@Cardiovascular@Kidney@Cardiovascular@Cardiovascular@Cardiovascular@Cardiovascular@Uterus@Uterus@Cardiovascular@Cardiovascular@Cardiovascular@Cardiovascular@Cardiovascular@Cardiovascular@Cardiovascular@Cardiovascul…	SRX359916@SRX150605@SRX7054657@SRX7054661@SRX7054615@SRX150606@SRX7055008@SRX7054622@SRX7055007@SRX7054611@SRX7054667@SRX7054668@SRX1460848@SRX7054664@SRX7054614@SRX2055843@SRX2355083@SRX7055004@SRX7054671@SRX7054662@SRX378804@SRX378805@SRX2207672@SRX7054670@SRX2355078@SRX7054672@SRX2355081@SRX2355085@SRX7054621@SRX7054618@SRX2207673@SRX7055006@SRX7054616@SRX7054666@SRX150605
TRUE	chr19	18570650	18570900	GDF15	35	chr19:18570534-18570977@chr19:18570554-18570868@chr19:18570571-18571235@chr19:18570579-18570904@chr19:18570599-18570954@chr19:18570601-18570857@chr19:18570601-18570909@chr19:18570603-18570891@chr19:18570608-18570858@chr19:18570615-18570892@chr19:18570616-18570852@chr19:18570619-18570853@chr19:18570621-18570905@chr19:18570626-18570863@chr19:18570628-18570866@chr19:18570629-18570888@chr19:18570632-…	Cardiovascular@Cardiovascular@Cardiovascular@Cardiovascular@Cardiovascular@Adipocyte@Cardiovascular@Cardiovascular@Cardiovascular@Cardiovascular@Cardiovascular@Adipocyte@Lung@Lung@Cardiovascular@Cardiovascular@Others@Lung@Cardiovascular@Adipocyte@Cardiovascular@Cardiovascular@Cardiovascular@Cardiovascular@Cardiovascular@Cardiovascular@Cardiovascular@Uterus@Uterus@Cardiovascular@Cardiovascular@Car…	SRX2207672@SRX7054671@SRX2207673@SRX7054616@SRX7054661@SRX813773@SRX7054618@SRX7054614@SRX7054664@SRX7054617@SRX2355079@SRX813772@SRX1672133@SRX1672130@SRX4947721@SRX7054657@SRX5938177@SRX212183@SRX7055006@SRX813774@SRX7054666@SRX7054670@SRX2355083@SRX7054663@SRX7055007@SRX2355085@SRX7054619@SRX027913@SRX027912@SRX7054668@SRX7054672@SRX7054615@SRX7055008@SRX7055004@SRX7054662
FALSE	chr16	85043841	85045841	ZDHHC7	35	chr16:85044794-85045052@chr16:85044993-85045506@chr16:85045008-85045300@chr16:85045025-85045222@chr16:85045026-85045181@chr16:85045028-85045183@chr16:85045029-85045528@chr16:85045032-85045358@chr16:85045034-85045505@chr16:85045041-85045247@chr16:85045042-85045272@chr16:85045051-85045279@chr16:85045052-85045286@chr16:85045054-85045257@chr16:85045057-85045360@chr16:85045058-85045350@chr16:85045067-…	Kidney@Blood@Cardiovascular@Cardiovascular@Cardiovascular@Blood@Cardiovascular@Cardiovascular@Cardiovascular@Cardiovascular@Cardiovascular@Cardiovascular@Cardiovascular@Cardiovascular@Cardiovascular@Cardiovascular@Blood@Blood@Cardiovascular@Blood@Blood@Cardiovascular@Cardiovascular@Blood@Cardiovascular@Cardiovascular@Blood@Cardiovascular@Blood@Digestive%20tract@Bone@Cardiovascular@Blood@Blood@Bre…	SRX3346352@SRX150605@SRX7054671@SRX2355078@SRX7054667@SRX1460848@SRX2207672@SRX7054614@SRX2207673@SRX7054621@SRX7055007@SRX7055006@SRX7054670@SRX7054622@SRX7054666@SRX7054615@SRX150365@SRX150608@SRX7054661@SRX150606@SRX150610@SRX7054616@SRX7054657@SRX017912@SRX7054662@SRX2355085@SRX017877@SRX7054617@SRX150362@SRX359916@SRX3638907@SRX7054672@SRX150353@SRX017913@SRX968976
FALSE	chr20	44419425	44421425	DNTTIP1	35	chr20:44420325-44420991@chr20:44420358-44420750@chr20:44420380-44420689@chr20:44420384-44420747@chr20:44420404-44420686@chr20:44420410-44420667@chr20:44420414-44420630@chr20:44420414-44420752@chr20:44420429-44420661@chr20:44420429-44420777@chr20:44420432-44420737@chr20:44420434-44420649@chr20:44420439-44420764@chr20:44420440-44420681@chr20:44420441-44420713@chr20:44420447-44420662@chr20:44420451-…	Digestive%20tract@Cardiovascular@Cardiovascular@Cardiovascular@Cardiovascular@Cardiovascular@Cardiovascular@Cardiovascular@Cardiovascular@Cardiovascular@Cardiovascular@Cardiovascular@Cardiovascular@Cardiovascular@Cardiovascular@Cardiovascular@Cardiovascular@Cardiovascular@Blood@Cardiovascular@Cardiovascular@Cardiovascular@Cardiovascular@Cardiovascular@Blood@Cardiovascular@Blood@Cardiovascular@Car…	SRX359916@SRX7054615@SRX2207672@SRX7054668@SRX7054670@SRX7055006@SRX7054616@SRX7054671@SRX7054614@SRX7054621@SRX7054619@SRX7054667@SRX7054661@SRX2207673@SRX7054657@SRX7054618@SRX2355085@SRX2355079@SRX1460848@SRX7054663@SRX7054664@SRX2355078@SRX7054666@SRX7055007@SRX4401064@SRX7054617@SRX150610@SRX7055008@SRX7054622@SRX7054611@SRX2055843@SRX1460847@SRX2355081@SRX2837382@SRX7054659
FALSE	chr17	74372498	74372748	SPHK1	34	chr17:74372509-74372775@chr17:74372509-74372775@chr17:74372516-74372788@chr17:74372516-74372788@chr17:74372520-74372782@chr17:74372520-74372782@chr17:74372523-74372771@chr17:74372523-74372771@chr17:74372526-74372791@chr17:74372526-74372791@chr17:74372541-74372757@chr17:74372541-74372757@chr17:74372544-74372768@chr17:74372544-74372768@chr17:74372546-74372748@chr17:74372546-74372748@chr17:74372550-…	Cardiovascular@Cardiovascular@Cardiovascular@Cardiovascular@Cardiovascular@Cardiovascular@Cardiovascular@Cardiovascular@Cardiovascular@Cardiovascular@Cardiovascular@Cardiovascular@Cardiovascular@Cardiovascular@Cardiovascular@Cardiovascular@Cardiovascular@Cardiovascular@Cardiovascular@Cardiovascular@Cardiovascular@Cardiovascular@Cardiovascular@Cardiovascular@Cardiovascular@Cardiovascular@Cardiovas…	SRX2207672@SRX2207672@SRX2355085@SRX2355085@SRX2355081@SRX2355081@SRX2355083@SRX2355083@SRX7055007@SRX7055007@SRX7054666@SRX7054666@SRX7055008@SRX7055008@SRX7054671@SRX7054671@SRX7054661@SRX7054661@SRX2207673@SRX2207673@SRX7054670@SRX7054670@SRX7054672@SRX7054672@SRX2355079@SRX2355079@SRX7054663@SRX7054663@SRX7054619@SRX7054619@SRX7055004@SRX7055004@SRX7054621@SRX7054621
FALSE	chr10	75949822	75950072	AP3M1	34	chr10:75949715-75950005@chr10:75949731-75950011@chr10:75949736-75950145@chr10:75949738-75950059@chr10:75949740-75949947@chr10:75949741-75950011@chr10:75949741-75950145@chr10:75949743-75950122@chr10:75949746-75950058@chr10:75949749-75950044@chr10:75949754-75950057@chr10:75949757-75950142@chr10:75949760-75950060@chr10:75949765-75950000@chr10:75949766-75950021@chr10:75949777-75949976@chr10:75949780-…	Cardiovascular@Cardiovascular@Others@Cardiovascular@Cardiovascular@Cardiovascular@Cardiovascular@Cardiovascular@Cardiovascular@Cardiovascular@Cardiovascular@Cardiovascular@Cardiovascular@Cardiovascular@Cardiovascular@Cardiovascular@Cardiovascular@Cardiovascular@Cardiovascular@Others@Cardiovascular@Cardiovascular@Cardiovascular@Cardiovascular@Cardiovascular@Cardiovascular@Others@Others@Cardiovascu…	SRX7055006@SRX7054663@SRX5938177@SRX7054621@SRX7054659@SRX7054615@SRX7054666@SRX7054661@SRX7054671@SRX7054611@SRX7054664@SRX7055007@SRX7054617@SRX7054670@SRX7054618@SRX7054622@SRX7054616@SRX7054614@SRX7055004@SRX2404132@SRX7054668@SRX7055008@SRX7054669@SRX2355085@SRX7054657@SRX2355079@SRX2404135@SRX2404134@SRX2355081@SRX7054667@SRX7055005@SRX7054662@SRX212183@SRX813774
FALSE	chr17	45356551	45356801	ITGB3	34	chr17:45356342-45356826@chr17:45356345-45356664@chr17:45356354-45356834@chr17:45356440-45356856@chr17:45356448-45356678@chr17:45356463-45356728@chr17:45356477-45356708@chr17:45356482-45356781@chr17:45356495-45356696@chr17:45356502-45356738@chr17:45356505-45356733@chr17:45356505-45356809@chr17:45356516-45356712@chr17:45356519-45356728@chr17:45356521-45356772@chr17:45356524-45356728@chr17:45356529-…	Cardiovascular@Adipocyte@Cardiovascular@Blood@Cardiovascular@Cardiovascular@Blood@Blood@Cardiovascular@Blood@Blood@Blood@Cardiovascular@Blood@Cardiovascular@Blood@Blood@Blood@Blood@Cardiovascular@Cardiovascular@Blood@Cardiovascular@Blood@Cardiovascular@Blood@Blood@Blood@Cardiovascular@Cardiovascular@Lung@Blood@Lung@Lung	SRX2207672@SRX813774@SRX2207673@SRX150605@SRX7055007@SRX7054661@SRX017912@SRX150610@SRX2355085@SRX150353@SRX017895@SRX2837382@SRX7055006@SRX017913@SRX7054666@SRX150359@SRX150557@SRX150362@SRX150608@SRX7054657@SRX7054619@SRX017871@SRX2355081@SRX017906@SRX7054670@SRX017891@SRX017907@SRX150606@SRX7054614@SRX7054618@SRX1672133@SRX017860@SRX1672130@SRX212183
FALSE	chr17	74372498	74372748	QRICH2	34	chr17:74372509-74372775@chr17:74372509-74372775@chr17:74372516-74372788@chr17:74372516-74372788@chr17:74372520-74372782@chr17:74372520-74372782@chr17:74372523-74372771@chr17:74372523-74372771@chr17:74372526-74372791@chr17:74372526-74372791@chr17:74372541-74372757@chr17:74372541-74372757@chr17:74372544-74372768@chr17:74372544-74372768@chr17:74372546-74372748@chr17:74372546-74372748@chr17:74372550-…	Cardiovascular@Cardiovascular@Cardiovascular@Cardiovascular@Cardiovascular@Cardiovascular@Cardiovascular@Cardiovascular@Cardiovascular@Cardiovascular@Cardiovascular@Cardiovascular@Cardiovascular@Cardiovascular@Cardiovascular@Cardiovascular@Cardiovascular@Cardiovascular@Cardiovascular@Cardiovascular@Cardiovascular@Cardiovascular@Cardiovascular@Cardiovascular@Cardiovascular@Cardiovascular@Cardiovas…	SRX2207672@SRX2207672@SRX2355085@SRX2355085@SRX2355081@SRX2355081@SRX2355083@SRX2355083@SRX7055007@SRX7055007@SRX7054666@SRX7054666@SRX7055008@SRX7055008@SRX7054671@SRX7054671@SRX7054661@SRX7054661@SRX2207673@SRX2207673@SRX7054670@SRX7054670@SRX7054672@SRX7054672@SRX2355079@SRX2355079@SRX7054663@SRX7054663@SRX7054619@SRX7054619@SRX7055004@SRX7055004@SRX7054621@SRX7054621
FALSE	chr17	80225456	80225706	SLC16A3	34	chr17:80225374-80225839@chr17:80225451-80225812@chr17:80225453-80225810@chr17:80225475-80225821@chr17:80225483-80225819@chr17:80225487-80225774@chr17:80225491-80225795@chr17:80225492-80225738@chr17:80225493-80225830@chr17:80225500-80225808@chr17:80225508-80225770@chr17:80225515-80225844@chr17:80225520-80225724@chr17:80225521-80225798@chr17:80225523-80225764@chr17:80225524-80225853@chr17:80225526-…	Digestive%20tract@Cardiovascular@Cardiovascular@Cardiovascular@Cardiovascular@Cardiovascular@Others@Cardiovascular@Cardiovascular@Cardiovascular@Cardiovascular@Cardiovascular@Cardiovascular@Cardiovascular@Cardiovascular@Cardiovascular@Cardiovascular@Cardiovascular@Cardiovascular@Cardiovascular@Adipocyte@Cardiovascular@Cardiovascular@Cardiovascular@Cardiovascular@Cardiovascular@Cardiovascular@Card…	SRX359916@SRX2207673@SRX7054666@SRX2207672@SRX7054661@SRX7054616@SRX5938177@SRX7054670@SRX7054664@SRX7054619@SRX7054618@SRX7054671@SRX2355085@SRX7055007@SRX7054657@SRX7055006@SRX7054615@SRX7054614@SRX7055004@SRX7054617@SRX813773@SRX2355081@SRX7054659@SRX7054668@SRX7054621@SRX7055008@SRX7054611@SRX7054662@SRX378805@SRX378804@SRX7054609@SRX7054622@SRX212183@SRX7054623
FALSE	chr5	139641060	139641310	PFDN1	34	chr5:139640925-139641425@chr5:139640933-139641510@chr5:139640940-139641247@chr5:139640946-139641260@chr5:139640955-139641273@chr5:139640957-139641222@chr5:139640965-139641291@chr5:139640968-139641251@chr5:139640971-139641273@chr5:139640973-139641206@chr5:139640975-139641236@chr5:139640989-139641218@chr5:139640991-139641220@chr5:139640991-139641239@chr5:139640995-139641130@chr5:139640998-139641329…	Cardiovascular@Cardiovascular@Cardiovascular@Cardiovascular@Cardiovascular@Cardiovascular@Cardiovascular@Cardiovascular@Cardiovascular@Cardiovascular@Cardiovascular@Cardiovascular@Cardiovascular@Cardiovascular@Cardiovascular@Cardiovascular@Cardiovascular@Cardiovascular@Cardiovascular@Cardiovascular@Cardiovascular@Cardiovascular@Cardiovascular@Cardiovascular@Cardiovascular@Cardiovascular@Cardiovas…	SRX2207672@SRX2207673@SRX425264@SRX7055004@SRX7054611@SRX7054622@SRX7054657@SRX7054666@SRX7054615@SRX7054659@SRX7054616@SRX7054669@SRX7054618@SRX7054670@SRX7054672@SRX7054621@SRX2207671@SRX7054617@SRX7054614@SRX7054661@SRX7054671@SRX7055006@SRX7055007@SRX7054619@SRX7054609@SRX425263@SRX7054664@SRX7054623@SRX2355079@SRX7054667@SRX7054624@SRX7054662@SRX7054663@SRX2355085
FALSE	chr6	2818240	2818490	SERPINB1	34	chr6:2818112-2818996@chr6:2818175-2818625@chr6:2818193-2819078@chr6:2818195-2819184@chr6:2818209-2818694@chr6:2818224-2818611@chr6:2818226-2818605@chr6:2818240-2818447@chr6:2818243-2818621@chr6:2818249-2818621@chr6:2818253-2818622@chr6:2818255-2818504@chr6:2818255-2818586@chr6:2818259-2818474@chr6:2818262-2818636@chr6:2818263-2818589@chr6:2818265-2818574@chr6:2818272-2818483@chr6:2818276-2818530@…	Others@Others@Cardiovascular@Cardiovascular@Others@Cardiovascular@Cardiovascular@Cardiovascular@Cardiovascular@Cardiovascular@Cardiovascular@Cardiovascular@Cardiovascular@Cardiovascular@Cardiovascular@Cardiovascular@Cardiovascular@Cardiovascular@Cardiovascular@Cardiovascular@Cardiovascular@Cardiovascular@Cardiovascular@Cardiovascular@Cardiovascular@Cardiovascular@Cardiovascular@Cardiovascular@Car…	SRX5938177@SRX2404132@SRX2207673@SRX2207672@SRX2404134@SRX7054661@SRX7054614@SRX7054611@SRX7054670@SRX7054617@SRX7054663@SRX7054667@SRX7054657@SRX7054613@SRX7055007@SRX7054616@SRX7054621@SRX7054623@SRX7054664@SRX7054619@SRX7054666@SRX7054618@SRX2207671@SRX7055006@SRX7054662@SRX7054659@SRX7055004@SRX425264@SRX7055005@SRX7054671@SRX7054609@SRX027912@SRX027913@SRX7055008
FALSE	chr6	76463757	76464007	MYO6	34	chr6:76463704-76463989@chr6:76463722-76464030@chr6:76463722-76464054@chr6:76463723-76464002@chr6:76463727-76464042@chr6:76463733-76464021@chr6:76463737-76464002@chr6:76463742-76463933@chr6:76463746-76463977@chr6:76463749-76463996@chr6:76463751-76463993@chr6:76463756-76464003@chr6:76463759-76463999@chr6:76463761-76463971@chr6:76463765-76463999@chr6:76463766-76463976@chr6:76463766-76463990@chr6:764…	Cardiovascular@Cardiovascular@Cardiovascular@Cardiovascular@Cardiovascular@Cardiovascular@Cardiovascular@Cardiovascular@Cardiovascular@Cardiovascular@Cardiovascular@Cardiovascular@Cardiovascular@Cardiovascular@Cardiovascular@Cardiovascular@Cardiovascular@Cardiovascular@Cardiovascular@Cardiovascular@Cardiovascular@Cardiovascular@Cardiovascular@Cardiovascular@Cardiovascular@Cardiovascular@Cardiovas…	SRX7054666@SRX7054661@SRX2207672@SRX7054616@SRX2207673@SRX7054617@SRX7054664@SRX7054667@SRX2355085@SRX7054614@SRX7054671@SRX7054657@SRX7055007@SRX2355079@SRX7054670@SRX7054618@SRX7054615@SRX7054619@SRX7055005@SRX7055006@SRX7054662@SRX7054611@SRX7054663@SRX7055004@SRX7054668@SRX7054622@SRX2207671@SRX7054659@SRX5938177@SRX2404134@SRX7054609@SRX7055008@SRX7054621@SRX2404132
FALSE	chr1	178062213	178064213	RASAL2	34	chr1:178062589-178062877@chr1:178062607-178062892@chr1:178062612-178062822@chr1:178062615-178062903@chr1:178062634-178062809@chr1:178062641-178063077@chr1:178062642-178062896@chr1:178062659-178062862@chr1:178062661-178062869@chr1:178062666-178062881@chr1:178062673-178062858@chr1:178062673-178062884@chr1:178062674-178063494@chr1:178062677-178062898@chr1:178062678-178062899@chr1:178062682-178063156…	Cardiovascular@Cardiovascular@Cardiovascular@Cardiovascular@Cardiovascular@Blood@Cardiovascular@Cardiovascular@Cardiovascular@Cardiovascular@Cardiovascular@Cardiovascular@Kidney@Cardiovascular@Cardiovascular@Cardiovascular@Cardiovascular@Cardiovascular@Cardiovascular@Cardiovascular@Cardiovascular@Cardiovascular@Cardiovascular@Cardiovascular@Cardiovascular@Cardiovascular@Kidney@Cardiovascular@Card…	SRX7054666@SRX7054661@SRX7054657@SRX7054614@SRX7055006@SRX4001967@SRX2207672@SRX2207673@SRX7054615@SRX7055004@SRX7054617@SRX7054616@SRX2055843@SRX7054670@SRX7054671@SRX7055007@SRX2355085@SRX2355079@SRX2355078@SRX7054618@SRX7054621@SRX7054664@SRX7054609@SRX7054619@SRX7055008@SRX2355081@SRX3636885@SRX7054620@SRX7054623@SRX7054663@SRX2270127@SRX7054615@SRX813774@SRX212183
TRUE	chr11	112096337	112098337	PTS	34	chr11:112096683-112097138@chr11:112096685-112097161@chr11:112096750-112097471@chr11:112096784-112097312@chr11:112096788-112097250@chr11:112096794-112097257@chr11:112096847-112097033@chr11:112096848-112097014@chr11:112096862-112097101@chr11:112096865-112097018@chr11:112096874-112097016@chr11:112096898-112097270@chr11:112096914-112097230@chr11:112096917-112097118@chr11:112096924-112097196@chr11:112…	Cardiovascular@Cardiovascular@Cardiovascular@Digestive%20tract@Cardiovascular@Cardiovascular@Cardiovascular@Bone@Blood@Blood@Blood@Cardiovascular@Cardiovascular@Cardiovascular@Blood@Blood@Others@Cardiovascular@Blood@Cardiovascular@Cardiovascular@Uterus@Uterus@Cardiovascular@Cardiovascular@Bone@Kidney@Blood@Cardiovascular@Cardiovascular@Blood@Bone@Blood@Cardiovascular	SRX2207672@SRX2207673@SRX7054671@SRX359916@SRX7054611@SRX7054661@SRX7054615@SRX3638907@SRX150605@SRX150362@SRX150610@SRX7054657@SRX7054664@SRX7054666@SRX150608@SRX150557@SRX5938177@SRX2355085@SRX017912@SRX7054672@SRX7054667@SRX378804@SRX378805@SRX7054609@SRX7054614@SRX3638907@SRX2055843@SRX150365@SRX7054616@SRX2355079@SRX017911@SRX3638907@SRX150605@SRX2207672
FALSE	chr14	103993758	103995758	TRMT61A	34	chr14:103993667-103994056@chr14:103993701-103994060@chr14:103993725-103993937@chr14:103993746-103994018@chr14:103993752-103993986@chr14:103993753-103993986@chr14:103993755-103994045@chr14:103993763-103993873@chr14:103993768-103994042@chr14:103993775-103993949@chr14:103993779-103993916@chr14:103993782-103994022@chr14:103993794-103994026@chr14:103993795-103994036@chr14:103993808-103994035@chr14:103…	Blood@Blood@Kidney@Blood@Blood@Blood@Blood@Blood@Blood@Blood@Blood@Blood@Blood@Blood@Blood@Blood@Blood@Cardiovascular@Cardiovascular@Cardiovascular@Cardiovascular@Blood@Cardiovascular@Cardiovascular@Cardiovascular@Kidney@Cardiovascular@Cardiovascular@Cardiovascular@Cardiovascular@Cardiovascular@Cardiovascular@Cardiovascular@Bone	SRX150605@SRX017912@SRX2055843@SRX017913@SRX017895@SRX150610@SRX150359@SRX150365@SRX4001967@SRX150362@SRX150606@SRX017859@SRX150353@SRX150557@SRX2837382@SRX017871@SRX017906@SRX7054670@SRX7054611@SRX7054661@SRX7054621@SRX1460848@SRX7054671@SRX2355085@SRX7055007@SRX2055843@SRX425264@SRX2355081@SRX2355078@SRX7054614@SRX7054664@SRX2355083@SRX2355079@SRX3638907
FALSE	chr19	50804224	50804474	MYH14	33	chr19:50804061-50804471@chr19:50804074-50804444@chr19:50804104-50804438@chr19:50804113-50804408@chr19:50804119-50804471@chr19:50804121-50804525@chr19:50804135-50804398@chr19:50804162-50804420@chr19:50804164-50804420@chr19:50804166-50804353@chr19:50804167-50804412@chr19:50804172-50804427@chr19:50804176-50804440@chr19:50804178-50804413@chr19:50804179-50804428@chr19:50804180-50804446@chr19:50804182-…	Cardiovascular@Cardiovascular@Cardiovascular@Cardiovascular@Cardiovascular@Cardiovascular@Cardiovascular@Cardiovascular@Cardiovascular@Cardiovascular@Cardiovascular@Cardiovascular@Cardiovascular@Cardiovascular@Cardiovascular@Cardiovascular@Cardiovascular@Cardiovascular@Cardiovascular@Cardiovascular@Cardiovascular@Cardiovascular@Cardiovascular@Cardiovascular@Cardiovascular@Cardiovascular@Cardiovas…	SRX2207672@SRX7054666@SRX7055007@SRX7054615@SRX2207673@SRX7054661@SRX7054618@SRX7054614@SRX7054662@SRX7054665@SRX7054663@SRX7055006@SRX7054611@SRX7054664@SRX7054617@SRX7054671@SRX2355079@SRX7055004@SRX7054616@SRX7054619@SRX7054609@SRX7054657@SRX2207671@SRX7054621@SRX7055005@SRX7054670@SRX7055008@SRX7054622@SRX2355085@SRX7054668@SRX7054667@SRX7054610@SRX7054672
FALSE	chr2	235897884	235898134	SH3BP4	33	chr2:235897875-235898254@chr2:235897897-235898294@chr2:235897939-235898241@chr2:235897943-235898277@chr2:235897943-235898279@chr2:235897950-235898201@chr2:235897951-235898258@chr2:235897965-235898194@chr2:235897970-235898299@chr2:235897976-235898253@chr2:235897979-235898197@chr2:235897979-235898243@chr2:235897980-235898281@chr2:235897988-235898232@chr2:235897990-235898259@chr2:235897991-235898235…	Lung@Cardiovascular@Cardiovascular@Cardiovascular@Cardiovascular@Cardiovascular@Others@Cardiovascular@Cardiovascular@Cardiovascular@Cardiovascular@Cardiovascular@Cardiovascular@Cardiovascular@Cardiovascular@Others@Cardiovascular@Cardiovascular@Cardiovascular@Cardiovascular@Cardiovascular@Cardiovascular@Cardiovascular@Cardiovascular@Cardiovascular@Cardiovascular@Cardiovascular@Cardiovascular@Cardi…	SRX1672130@SRX2207672@SRX7054671@SRX7054661@SRX2207673@SRX7054662@SRX2404140@SRX425264@SRX7055006@SRX7054663@SRX7054664@SRX7055007@SRX7054619@SRX7054615@SRX7054670@SRX2404135@SRX7055004@SRX7054621@SRX7054617@SRX7055008@SRX7054657@SRX2207671@SRX7054666@SRX7054614@SRX7054668@SRX7054611@SRX7054622@SRX7054667@SRX7054659@SRX7055005@SRX2355085@SRX2355078@SRX7054672
TRUE	chr7	128501806	128503806	ATP6V1F	33	chr7:128502387-128503270@chr7:128502632-128502953@chr7:128502649-128502932@chr7:128502650-128502968@chr7:128502652-128502944@chr7:128502656-128503167@chr7:128502662-128503060@chr7:128502671-128502938@chr7:128502674-128502978@chr7:128502686-128503046@chr7:128502696-128503057@chr7:128502710-128503192@chr7:128502715-128502874@chr7:128502717-128502931@chr7:128502717-128502947@chr7:128502718-128502939…	Digestive%20tract@Cardiovascular@Cardiovascular@Cardiovascular@Cardiovascular@Cardiovascular@Cardiovascular@Cardiovascular@Cardiovascular@Cardiovascular@Cardiovascular@Cardiovascular@Cardiovascular@Cardiovascular@Uterus@Cardiovascular@Cardiovascular@Cardiovascular@Uterus@Cardiovascular@Cardiovascular@Blood@Cardiovascular@Cardiovascular@Cardiovascular@Cardiovascular@Cardiovascular@Uterus@Blood@Car…	SRX359916@SRX7054622@SRX2355078@SRX7054671@SRX7054666@SRX7054611@SRX7054614@SRX7055006@SRX2355085@SRX7054670@SRX7054618@SRX7054661@SRX2355081@SRX7054659@SRX378805@SRX7054619@SRX2207673@SRX2207672@SRX378804@SRX7054615@SRX7054667@SRX1460848@SRX7054616@SRX7054669@SRX7054657@SRX7054668@SRX7054621@SRX027915@SRX150608@SRX7054665@SRX150605@SRX017912@SRX4401063
FALSE	chr14	31560038	31560288	STRN3	32	chr14:31559862-31560297@chr14:31559862-31560315@chr14:31559870-31560457@chr14:31559884-31560341@chr14:31559930-31560283@chr14:31559947-31560253@chr14:31559961-31560335@chr14:31559961-31560406@chr14:31559962-31560263@chr14:31559969-31560475@chr14:31559971-31560186@chr14:31559980-31560170@chr14:31559982-31560244@chr14:31559986-31560399@chr14:31559992-31560257@chr14:31560001-31560327@chr14:31560007-…	Cardiovascular@Cardiovascular@Lung@Cardiovascular@Cardiovascular@Cardiovascular@Cardiovascular@Cardiovascular@Cardiovascular@Adipocyte@Cardiovascular@Cardiovascular@Cardiovascular@Cardiovascular@Cardiovascular@Cardiovascular@Cardiovascular@Cardiovascular@Cardiovascular@Cardiovascular@Cardiovascular@Cardiovascular@Cardiovascular@Cardiovascular@Cardiovascular@Cardiovascular@Cardiovascular@Adipocyte…	SRX2207672@SRX2207673@SRX212183@SRX7054614@SRX7054661@SRX7054665@SRX7054671@SRX7055007@SRX7054616@SRX813774@SRX7054619@SRX7054621@SRX7054663@SRX7054666@SRX7054670@SRX7054615@SRX7055008@SRX2355079@SRX7054617@SRX2355081@SRX2355085@SRX7055006@SRX7054611@SRX7054662@SRX7054618@SRX7055004@SRX7054668@SRX813772@SRX7054609@SRX813773@SRX7054622@SRX7054664
FALSE	chr2	28582256	28582506	FOSL2	32	chr2:28582100-28582493@chr2:28582100-28582521@chr2:28582121-28582471@chr2:28582122-28582421@chr2:28582135-28582446@chr2:28582139-28582475@chr2:28582146-28582401@chr2:28582147-28582418@chr2:28582151-28582331@chr2:28582157-28582358@chr2:28582160-28582382@chr2:28582164-28582473@chr2:28582167-28582420@chr2:28582168-28582471@chr2:28582169-28582398@chr2:28582174-28582404@chr2:28582185-28582351@chr2:285…	Cardiovascular@Cardiovascular@Blood@Cardiovascular@Cardiovascular@Cardiovascular@Cardiovascular@Cardiovascular@Cardiovascular@Cardiovascular@Cardiovascular@Cardiovascular@Cardiovascular@Cardiovascular@Cardiovascular@Cardiovascular@Cardiovascular@Cardiovascular@Cardiovascular@Cardiovascular@Blood@Cardiovascular@Blood@Kidney@Kidney@Blood@Blood@Blood@Kidney@Blood@Blood@Uterus	SRX2207672@SRX2207673@SRX1460848@SRX7054617@SRX7054614@SRX7054619@SRX7054611@SRX7054657@SRX7054663@SRX7054622@SRX7054615@SRX7054661@SRX7054618@SRX7054664@SRX7055006@SRX7054671@SRX2355085@SRX7055008@SRX7054666@SRX7054670@SRX150605@SRX7054609@SRX150362@SRX2055843@SRX3346352@SRX2837382@SRX150359@SRX1460847@SRX3636885@SRX017913@SRX017912@SRX378805
FALSE	chr2	9734934	9735184	YWHAQ	32	chr2:9734775-9735127@chr2:9734786-9735127@chr2:9734788-9735227@chr2:9734801-9734979@chr2:9734807-9735096@chr2:9734809-9735155@chr2:9734812-9735193@chr2:9734817-9735136@chr2:9734827-9735137@chr2:9734831-9735103@chr2:9734833-9735138@chr2:9734844-9735107@chr2:9734849-9735071@chr2:9734857-9735087@chr2:9734864-9735158@chr2:9734866-9735133@chr2:9734873-9735061@chr2:9734873-9735092@chr2:9734874-9735058@…	Cardiovascular@Cardiovascular@Cardiovascular@Cardiovascular@Cardiovascular@Cardiovascular@Others@Cardiovascular@Cardiovascular@Cardiovascular@Cardiovascular@Cardiovascular@Cardiovascular@Cardiovascular@Cardiovascular@Cardiovascular@Cardiovascular@Cardiovascular@Cardiovascular@Cardiovascular@Cardiovascular@Cardiovascular@Cardiovascular@Cardiovascular@Cardiovascular@Cardiovascular@Cardiovascular@Ca…	SRX2207672@SRX2207673@SRX7054666@SRX7055005@SRX7054616@SRX7054661@SRX5938177@SRX7055006@SRX7054614@SRX7054670@SRX7054671@SRX7054617@SRX7054657@SRX7054619@SRX7055007@SRX7054618@SRX7054667@SRX7054622@SRX7055004@SRX7054611@SRX7054664@SRX7054668@SRX7054621@SRX7054609@SRX7054615@SRX7054672@SRX7055008@SRX7054613@SRX7054663@SRX2355085@SRX2355081@SRX7054665
FALSE	chr3	38195570	38195820	OXSR1	32	chr3:38195497-38195813@chr3:38195498-38195749@chr3:38195499-38195821@chr3:38195507-38195796@chr3:38195509-38195773@chr3:38195509-38195837@chr3:38195518-38195770@chr3:38195518-38195809@chr3:38195531-38195822@chr3:38195534-38195802@chr3:38195535-38195829@chr3:38195538-38195783@chr3:38195538-38195820@chr3:38195541-38195786@chr3:38195550-38195789@chr3:38195550-38195800@chr3:38195552-38195750@chr3:381…	Cardiovascular@Cardiovascular@Cardiovascular@Cardiovascular@Cardiovascular@Cardiovascular@Cardiovascular@Cardiovascular@Cardiovascular@Cardiovascular@Cardiovascular@Cardiovascular@Cardiovascular@Cardiovascular@Cardiovascular@Others@Cardiovascular@Cardiovascular@Cardiovascular@Cardiovascular@Cardiovascular@Cardiovascular@Cardiovascular@Cardiovascular@Cardiovascular@Cardiovascular@Cardiovascular@Ca…	SRX7055007@SRX7055008@SRX7054661@SRX7054621@SRX7055004@SRX7054657@SRX7054670@SRX7054671@SRX7054611@SRX7054666@SRX7054615@SRX7054617@SRX7055006@SRX7054614@SRX7054662@SRX5938177@SRX2207673@SRX7054663@SRX7054622@SRX7054669@SRX7054664@SRX7054619@SRX7054659@SRX7054616@SRX2355079@SRX7054667@SRX2207672@SRX7054668@SRX7054672@SRX7054618@SRX7054660@SRX7054609
FALSE	chr11	3875782	3877782	STIM1	32	chr11:3875692-3875839@chr11:3875713-3875818@chr11:3875771-3875911@chr11:3875977-3876404@chr11:3876003-3876540@chr11:3876038-3876395@chr11:3876050-3876721@chr11:3876062-3876473@chr11:3876069-3876326@chr11:3876078-3876205@chr11:3876087-3876675@chr11:3876100-3876464@chr11:3876103-3876516@chr11:3876104-3876289@chr11:3876111-3876301@chr11:3876117-3876426@chr11:3876123-3876395@chr11:3876152-3876365@chr…	Blood@Blood@Blood@Cardiovascular@Cardiovascular@Cardiovascular@Cardiovascular@Cardiovascular@Blood@Adipocyte@Cardiovascular@Cardiovascular@Cardiovascular@Cardiovascular@Blood@Cardiovascular@Cardiovascular@Cardiovascular@Cardiovascular@Blood@Cardiovascular@Cardiovascular@Cardiovascular@Blood@Cardiovascular@Cardiovascular@Uterus@Cardiovascular@Cardiovascular@Blood@Cardiovascular@Digestive%20tract	SRX150605@SRX150608@SRX150606@SRX2207672@SRX2207673@SRX2355085@SRX7054666@SRX7055007@SRX150605@SRX813774@SRX7054661@SRX7054671@SRX7054670@SRX7054668@SRX017912@SRX7054619@SRX7055006@SRX7054664@SRX7054615@SRX150610@SRX7054617@SRX7054614@SRX2355078@SRX017895@SRX7054657@SRX7054618@SRX378804@SRX2355081@SRX4947721@SRX1460848@SRX7054609@SRX359916
TRUE	chr1	59164497	59166497	MYSM1	32	chr1:59165365-59165825@chr1:59165543-59165884@chr1:59165547-59165759@chr1:59165549-59165926@chr1:59165559-59165882@chr1:59165564-59165876@chr1:59165569-59165918@chr1:59165570-59165854@chr1:59165579-59165883@chr1:59165596-59165879@chr1:59165608-59165860@chr1:59165611-59165826@chr1:59165618-59165824@chr1:59165619-59165793@chr1:59165619-59165875@chr1:59165620-59165819@chr1:59165625-59165903@chr1:591…	Digestive%20tract@Cardiovascular@Liver@Cardiovascular@Cardiovascular@Cardiovascular@Blood@Others@Cardiovascular@Cardiovascular@Cardiovascular@Cardiovascular@Cardiovascular@Blood@Cardiovascular@Cardiovascular@Cardiovascular@Bone@Cardiovascular@Cardiovascular@Cardiovascular@Cardiovascular@Cardiovascular@Cardiovascular@Cardiovascular@Cardiovascular@Cardiovascular@Cardiovascular@Cardiovascular@Cardio…	SRX359916@SRX7055006@SRX2270129@SRX7054661@SRX7054657@SRX7054622@SRX150605@SRX5938177@SRX7055007@SRX7054614@SRX2207673@SRX7054615@SRX7054617@SRX150608@SRX7054671@SRX7054663@SRX7054666@SRX3638907@SRX7054668@SRX2355085@SRX7054670@SRX7054618@SRX7054616@SRX7054619@SRX7054664@SRX2207672@SRX7054611@SRX7055004@SRX7054667@SRX2355078@SRX7054609@SRX2355081
TRUE	chr4	146402357	146404357	SMAD1	32	chr4:146402690-146403069@chr4:146402727-146403039@chr4:146402747-146403059@chr4:146402796-146402958@chr4:146402808-146402966@chr4:146402821-146402985@chr4:146402921-146403091@chr4:146403792-146404112@chr4:146403797-146404024@chr4:146403800-146404100@chr4:146403809-146404145@chr4:146403810-146404042@chr4:146403814-146404145@chr4:146403818-146404053@chr4:146403819-146404065@chr4:146403821-146404162…	Cardiovascular@Cardiovascular@Cardiovascular@Liver@Cardiovascular@Cardiovascular@Cardiovascular@Blood@Cardiovascular@Cardiovascular@Cardiovascular@Cardiovascular@Cardiovascular@Cardiovascular@Cardiovascular@Cardiovascular@Cardiovascular@Cardiovascular@Cardiovascular@Cardiovascular@Cardiovascular@Cardiovascular@Cardiovascular@Cardiovascular@Cardiovascular@Cardiovascular@Cardiovascular@Cardiovascul…	SRX2207672@SRX7054664@SRX2207673@SRX2270129@SRX2355078@SRX7054619@SRX7054662@SRX150605@SRX7054663@SRX7055007@SRX7054661@SRX7054615@SRX2207672@SRX7054622@SRX7054657@SRX7054666@SRX7054617@SRX7055006@SRX7054621@SRX7054670@SRX7054614@SRX7054619@SRX7054671@SRX7055004@SRX7054616@SRX2355085@SRX2207673@SRX7054609@SRX212183@SRX7054611@SRX7054618@SRX7055008
FALSE	chr8	100024743	100026743	VPS13B	32	chr8:100024840-100025650@chr8:100025003-100025716@chr8:100025097-100025651@chr8:100025120-100025585@chr8:100025150-100025570@chr8:100025161-100025527@chr8:100025201-100025553@chr8:100025211-100025416@chr8:100025220-100025489@chr8:100025220-100025640@chr8:100025238-100025513@chr8:100025247-100025405@chr8:100025274-100025503@chr8:100025278-100025602@chr8:100025287-100025522@chr8:100025295-100025467…	Digestive%20tract@Kidney@Kidney@Blood@Cardiovascular@Liver@Blood@Cardiovascular@Blood@Cardiovascular@Blood@Blood@Others@Cardiovascular@Others@Cardiovascular@Cardiovascular@Cardiovascular@Cardiovascular@Blood@Blood@Blood@Cardiovascular@Cardiovascular@Cardiovascular@Blood@Cardiovascular@Cardiovascular@Blood@Cardiovascular@Blood@Breast	SRX359916@SRX2055843@SRX3636885@SRX4001967@SRX7054615@SRX2270129@SRX150605@SRX7054611@SRX150606@SRX2207672@SRX017912@SRX2837382@SRX5938177@SRX2207673@SRX2404134@SRX7054666@SRX7054616@SRX7055007@SRX7054614@SRX4401064@SRX150608@SRX150557@SRX7054671@SRX7054667@SRX7054621@SRX150610@SRX7054619@SRX7054661@SRX017895@SRX7054664@SRX1460848@SRX968976
FALSE	chr2	231920677	231922677	PSMD1	31	chr2:231921193-231921350@chr2:231921204-231921513@chr2:231921207-231921433@chr2:231921207-231921515@chr2:231921210-231921785@chr2:231921216-231921467@chr2:231921218-231921457@chr2:231921220-231921369@chr2:231921221-231921350@chr2:231921230-231921351@chr2:231921233-231921518@chr2:231921239-231921427@chr2:231921244-231921386@chr2:231921246-231921514@chr2:231921247-231921372@chr2:231921248-231921393…	Cardiovascular@Cardiovascular@Others@Cardiovascular@Digestive%20tract@Cardiovascular@Blood@Cardiovascular@Blood@Blood@Cardiovascular@Blood@Blood@Blood@Cardiovascular@Blood@Blood@Cardiovascular@Cardiovascular@Blood@Kidney@Cardiovascular@Cardiovascular@Cardiovascular@Cardiovascular@Cardiovascular@Kidney@Cardiovascular@Cardiovascular@Cardiovascular@Cardiovascular	SRX7054664@SRX2207672@SRX2404140@SRX7054614@SRX359916@SRX7054615@SRX150353@SRX2355085@SRX150362@SRX150606@SRX7054657@SRX150605@SRX1460848@SRX150608@SRX2355081@SRX150610@SRX4401061@SRX2355078@SRX7054671@SRX017895@SRX3636885@SRX7054617@SRX2207673@SRX7054611@SRX7054619@SRX7054661@SRX2055843@SRX7054666@SRX7054621@SRX7054622@SRX7054614
FALSE	chr19	17420092	17420342	DDA1	30	chr19:17419989-17420647@chr19:17419989-17420647@chr19:17420059-17420277@chr19:17420059-17420277@chr19:17420064-17420331@chr19:17420064-17420331@chr19:17420068-17420308@chr19:17420068-17420308@chr19:17420096-17420292@chr19:17420096-17420292@chr19:17420100-17420355@chr19:17420100-17420355@chr19:17420105-17420232@chr19:17420105-17420232@chr19:17420109-17420380@chr19:17420109-17420380@chr19:17420112-…	Digestive%20tract@Digestive%20tract@Cardiovascular@Cardiovascular@Cardiovascular@Cardiovascular@Cardiovascular@Cardiovascular@Cardiovascular@Cardiovascular@Cardiovascular@Cardiovascular@Blood@Blood@Blood@Blood@Cardiovascular@Cardiovascular@Cardiovascular@Cardiovascular@Cardiovascular@Cardiovascular@Cardiovascular@Cardiovascular@Cardiovascular@Cardiovascular@Cardiovascular@Cardiovascular@Cardiovas…	SRX359916@SRX359916@SRX2355081@SRX2355081@SRX7054661@SRX7054661@SRX2355085@SRX2355085@SRX7054615@SRX7054615@SRX7054671@SRX7054671@SRX150610@SRX150610@SRX1460848@SRX1460848@SRX7054664@SRX7054664@SRX2355078@SRX2355078@SRX7054618@SRX7054618@SRX7054670@SRX7054670@SRX7054614@SRX7054614@SRX7054622@SRX7054622@SRX7054669@SRX7054669
TRUE	chr20	36619022	36619272	VSTM2L	30	chr20:36619011-36619344@chr20:36619011-36619344@chr20:36619015-36619228@chr20:36619015-36619228@chr20:36619015-36619242@chr20:36619015-36619242@chr20:36619044-36619200@chr20:36619044-36619200@chr20:36619058-36619241@chr20:36619058-36619241@chr20:36619059-36619318@chr20:36619059-36619318@chr20:36619068-36619208@chr20:36619068-36619208@chr20:36619069-36619194@chr20:36619069-36619194@chr20:36619078-…	Lung@Lung@Blood@Blood@Blood@Blood@Blood@Blood@Blood@Blood@Lung@Lung@Blood@Blood@Blood@Blood@Blood@Blood@Blood@Blood@Blood@Blood@Blood@Blood@Blood@Blood@Blood@Blood@Blood@Blood	SRX1672130@SRX1672130@SRX017912@SRX017912@SRX150605@SRX150605@SRX150365@SRX150365@SRX150557@SRX150557@SRX1672129@SRX1672129@SRX150359@SRX150359@SRX017859@SRX017859@SRX017906@SRX017906@SRX150610@SRX150610@SRX150362@SRX150362@SRX150606@SRX150606@SRX150353@SRX150353@SRX017895@SRX017895@SRX150608@SRX150608
TRUE	chrX	40869498	40869748	USP9X	30	chrX:40869117-40870100@chrX:40869119-40870086@chrX:40869330-40870044@chrX:40869380-40870067@chrX:40869405-40870012@chrX:40869417-40869708@chrX:40869421-40870093@chrX:40869430-40869837@chrX:40869434-40869672@chrX:40869435-40870109@chrX:40869437-40869632@chrX:40869446-40870082@chrX:40869452-40869998@chrX:40869453-40869692@chrX:40869455-40869596@chrX:40869459-40869626@chrX:40869465-40870037@chrX:408…	Cardiovascular@Cardiovascular@Cardiovascular@Cardiovascular@Cardiovascular@Cardiovascular@Cardiovascular@Cardiovascular@Cardiovascular@Cardiovascular@Cardiovascular@Cardiovascular@Cardiovascular@Cardiovascular@Cardiovascular@Cardiovascular@Cardiovascular@Cardiovascular@Cardiovascular@Cardiovascular@Cardiovascular@Cardiovascular@Cardiovascular@Cardiovascular@Cardiovascular@Cardiovascular@Cardiovas…	SRX2207673@SRX2207672@SRX7054661@SRX7054619@SRX7054670@SRX7054622@SRX7055007@SRX7054657@SRX2355085@SRX7054666@SRX7054618@SRX7054614@SRX7055004@SRX7054616@SRX7054672@SRX7054668@SRX7054671@SRX7054664@SRX7055008@SRX7055006@SRX7054615@SRX7054662@SRX7054617@SRX7054663@SRX7054621@SRX7054611@SRX2207671@SRX7054667@SRX7054609@SRX2355079
FALSE	chr19	17420092	17420342	BABAM1	30	chr19:17419989-17420647@chr19:17419989-17420647@chr19:17420059-17420277@chr19:17420059-17420277@chr19:17420064-17420331@chr19:17420064-17420331@chr19:17420068-17420308@chr19:17420068-17420308@chr19:17420096-17420292@chr19:17420096-17420292@chr19:17420100-17420355@chr19:17420100-17420355@chr19:17420105-17420232@chr19:17420105-17420232@chr19:17420109-17420380@chr19:17420109-17420380@chr19:17420112-…	Digestive%20tract@Digestive%20tract@Cardiovascular@Cardiovascular@Cardiovascular@Cardiovascular@Cardiovascular@Cardiovascular@Cardiovascular@Cardiovascular@Cardiovascular@Cardiovascular@Blood@Blood@Blood@Blood@Cardiovascular@Cardiovascular@Cardiovascular@Cardiovascular@Cardiovascular@Cardiovascular@Cardiovascular@Cardiovascular@Cardiovascular@Cardiovascular@Cardiovascular@Cardiovascular@Cardiovas…	SRX359916@SRX359916@SRX2355081@SRX2355081@SRX7054661@SRX7054661@SRX2355085@SRX2355085@SRX7054615@SRX7054615@SRX7054671@SRX7054671@SRX150610@SRX150610@SRX1460848@SRX1460848@SRX7054664@SRX7054664@SRX2355078@SRX2355078@SRX7054618@SRX7054618@SRX7054670@SRX7054670@SRX7054614@SRX7054614@SRX7054622@SRX7054622@SRX7054669@SRX7054669
FALSE	chr20	30135024	30135274	ID1	30	chr20:30134826-30135413@chr20:30134929-30135279@chr20:30134958-30135239@chr20:30134959-30135302@chr20:30134973-30135347@chr20:30134983-30135333@chr20:30134995-30135275@chr20:30135000-30135386@chr20:30135015-30135241@chr20:30135024-30135253@chr20:30135034-30135384@chr20:30135038-30135186@chr20:30135043-30135253@chr20:30135051-30135296@chr20:30135056-30135288@chr20:30135062-30135342@chr20:30135063-…	Digestive%20tract@Blood@Blood@Others@Cardiovascular@Cardiovascular@Blood@Cardiovascular@Blood@Blood@Cardiovascular@Blood@Cardiovascular@Cardiovascular@Cardiovascular@Cardiovascular@Blood@Blood@Cardiovascular@Blood@Blood@Cardiovascular@Cardiovascular@Cardiovascular@Blood@Cardiovascular@Cardiovascular@Cardiovascular@Cardiovascular@Blood	SRX359916@SRX4401064@SRX4401061@SRX5938177@SRX7054661@SRX7054611@SRX150605@SRX2207673@SRX150608@SRX4401063@SRX2207672@SRX017913@SRX7055008@SRX2355085@SRX7054657@SRX7054666@SRX4401062@SRX017912@SRX2355078@SRX1460848@SRX4401065@SRX7054616@SRX7054614@SRX7055004@SRX4401066@SRX7054664@SRX7055007@SRX7054609@SRX7054665@SRX150557
TRUE	chr20	36619022	36619272	RPRD1B	30	chr20:36619011-36619344@chr20:36619011-36619344@chr20:36619015-36619228@chr20:36619015-36619228@chr20:36619015-36619242@chr20:36619015-36619242@chr20:36619044-36619200@chr20:36619044-36619200@chr20:36619058-36619241@chr20:36619058-36619241@chr20:36619059-36619318@chr20:36619059-36619318@chr20:36619068-36619208@chr20:36619068-36619208@chr20:36619069-36619194@chr20:36619069-36619194@chr20:36619078-…	Lung@Lung@Blood@Blood@Blood@Blood@Blood@Blood@Blood@Blood@Lung@Lung@Blood@Blood@Blood@Blood@Blood@Blood@Blood@Blood@Blood@Blood@Blood@Blood@Blood@Blood@Blood@Blood@Blood@Blood	SRX1672130@SRX1672130@SRX017912@SRX017912@SRX150605@SRX150605@SRX150365@SRX150365@SRX150557@SRX150557@SRX1672129@SRX1672129@SRX150359@SRX150359@SRX017859@SRX017859@SRX017906@SRX017906@SRX150610@SRX150610@SRX150362@SRX150362@SRX150606@SRX150606@SRX150353@SRX150353@SRX017895@SRX017895@SRX150608@SRX150608
FALSE	chr2	235930358	235930608	SH3BP4	30	chr2:235930399-235930808@chr2:235930404-235930762@chr2:235930421-235930784@chr2:235930425-235930786@chr2:235930430-235930773@chr2:235930431-235930682@chr2:235930432-235930766@chr2:235930439-235930770@chr2:235930440-235930611@chr2:235930444-235930794@chr2:235930445-235930694@chr2:235930446-235930763@chr2:235930450-235930773@chr2:235930455-235930730@chr2:235930460-235930722@chr2:235930462-235930754…	Cardiovascular@Cardiovascular@Cardiovascular@Cardiovascular@Cardiovascular@Lung@Cardiovascular@Cardiovascular@Cardiovascular@Cardiovascular@Cardiovascular@Cardiovascular@Cardiovascular@Cardiovascular@Cardiovascular@Cardiovascular@Cardiovascular@Cardiovascular@Cardiovascular@Others@Cardiovascular@Cardiovascular@Cardiovascular@Cardiovascular@Cardiovascular@Others@Cardiovascular@Cardiovascular@Cardi…	SRX7054617@SRX2355079@SRX2207672@SRX7054615@SRX2207673@SRX1672130@SRX7054618@SRX7054661@SRX7054669@SRX7054614@SRX7054663@SRX7054611@SRX7055007@SRX7054657@SRX7054621@SRX7054664@SRX7054668@SRX7054666@SRX7054609@SRX5938177@SRX7055006@SRX7054671@SRX7054670@SRX7054616@SRX7055004@SRX2404135@SRX7055005@SRX7054622@SRX7054659@SRX1672133
TRUE	chr22	39051757	39053757	CBY1	30	chr22:39052228-39052693@chr22:39052275-39052704@chr22:39052281-39052636@chr22:39052284-39052665@chr22:39052295-39052712@chr22:39052296-39052632@chr22:39052313-39052938@chr22:39052317-39052599@chr22:39052353-39052708@chr22:39052365-39052577@chr22:39052371-39052691@chr22:39052401-39052612@chr22:39052412-39052544@chr22:39052421-39052669@chr22:39052425-39052611@chr22:39052433-39052677@chr22:39052436-…	Cardiovascular@Cardiovascular@Cardiovascular@Cardiovascular@Cardiovascular@Cardiovascular@Digestive%20tract@Cardiovascular@Cardiovascular@Blood@Cardiovascular@Cardiovascular@Adipocyte@Cardiovascular@Blood@Cardiovascular@Kidney@Cardiovascular@Cardiovascular@Cardiovascular@Blood@Blood@Cardiovascular@Cardiovascular@Blood@Uterus@Cardiovascular@Uterus@Cardiovascular@Cardiovascular	SRX2355085@SRX2207672@SRX7055007@SRX7054657@SRX7054661@SRX7054671@SRX359916@SRX2355079@SRX2207673@SRX150610@SRX7054666@SRX7054667@SRX813774@SRX7054619@SRX150605@SRX7054614@SRX2055843@SRX7055006@SRX2355083@SRX7054616@SRX150359@SRX150608@SRX7054670@SRX7054662@SRX2837382@SRX378804@SRX7054622@SRX378805@SRX7054615@SRX7054663
FALSE	chr2	170550481	170552481	CCDC173	30	chr2:170550691-170551409@chr2:170550740-170550992@chr2:170550764-170551032@chr2:170550805-170551111@chr2:170550810-170551055@chr2:170550818-170551064@chr2:170550830-170551186@chr2:170550832-170551033@chr2:170550836-170551128@chr2:170550840-170551094@chr2:170550852-170551033@chr2:170550853-170551054@chr2:170550857-170551072@chr2:170550857-170551085@chr2:170550865-170551058@chr2:170550870-170551159…	Digestive%20tract@Blood@Blood@Cardiovascular@Cardiovascular@Cardiovascular@Cardiovascular@Cardiovascular@Cardiovascular@Cardiovascular@Cardiovascular@Cardiovascular@Cardiovascular@Cardiovascular@Cardiovascular@Blood@Cardiovascular@Cardiovascular@Cardiovascular@Blood@Kidney@Uterus@Uterus@Cardiovascular@Liver@Cardiovascular@Bone@Blood@Adipocyte@Adipocyte	SRX359916@SRX4401064@SRX150605@SRX7054661@SRX7054657@SRX7054671@SRX7054666@SRX2207672@SRX7054614@SRX2355085@SRX7054615@SRX2355078@SRX7054611@SRX7054670@SRX7054662@SRX1460848@SRX7054616@SRX7055008@SRX2207673@SRX150610@SRX2055843@SRX378805@SRX378804@SRX2355081@SRX2270129@SRX2355079@SRX3638907@SRX150605@SRX813773@SRX813772
FALSE	chr8	124779678	124781678	FAM91A1	30	chr8:124780391-124780853@chr8:124780440-124780792@chr8:124780452-124780818@chr8:124780455-124780896@chr8:124780458-124780826@chr8:124780469-124780837@chr8:124780492-124780846@chr8:124780503-124780801@chr8:124780507-124780864@chr8:124780527-124780802@chr8:124780549-124780794@chr8:124780551-124780724@chr8:124780553-124780815@chr8:124780557-124780727@chr8:124780559-124780847@chr8:124780560-124780901…	Kidney@Cardiovascular@Cardiovascular@Cardiovascular@Cardiovascular@Cardiovascular@Cardiovascular@Cardiovascular@Cardiovascular@Others@Cardiovascular@Cardiovascular@Cardiovascular@Cardiovascular@Cardiovascular@Cardiovascular@Cardiovascular@Cardiovascular@Cardiovascular@Cardiovascular@Cardiovascular@Cardiovascular@Cardiovascular@Cardiovascular@Blood@Cardiovascular@Bone@Blood@Blood@Liver	SRX3636885@SRX7054670@SRX7054616@SRX7054614@SRX7054666@SRX7055007@SRX7054661@SRX2207673@SRX7055004@SRX5938177@SRX7054664@SRX2355081@SRX7054671@SRX2355085@SRX2207672@SRX7054657@SRX7055008@SRX7054615@SRX2355078@SRX7054667@SRX7054618@SRX7054622@SRX7054619@SRX7054611@SRX1460848@SRX7054659@SRX3638907@SRX150605@SRX150608@SRX2270129
TRUE	chr8	134582933	134584933	ST3GAL1	30	chr8:134583865-134584325@chr8:134583896-134584062@chr8:134583992-134584569@chr8:134584010-134584577@chr8:134584024-134584540@chr8:134584029-134584260@chr8:134584032-134584254@chr8:134584034-134584601@chr8:134584041-134584468@chr8:134584043-134584230@chr8:134584043-134584244@chr8:134584044-134584477@chr8:134584048-134584453@chr8:134584052-134584288@chr8:134584057-134584387@chr8:134584061-134584497…	Others@Adipocyte@Cardiovascular@Cardiovascular@Cardiovascular@Cardiovascular@Cardiovascular@Cardiovascular@Cardiovascular@Cardiovascular@Cardiovascular@Cardiovascular@Cardiovascular@Cardiovascular@Cardiovascular@Cardiovascular@Cardiovascular@Cardiovascular@Cardiovascular@Cardiovascular@Cardiovascular@Cardiovascular@Cardiovascular@Cardiovascular@Cardiovascular@Cardiovascular@Cardiovascular@Cardiov…	SRX5938177@SRX813774@SRX7054614@SRX7054615@SRX7054666@SRX7054661@SRX7054616@SRX7054611@SRX7055006@SRX7054667@SRX7054657@SRX7054671@SRX7054619@SRX2207672@SRX7054670@SRX7054621@SRX7055007@SRX7054618@SRX7054664@SRX7054663@SRX7054659@SRX7054668@SRX7054662@SRX7054622@SRX7055008@SRX2355078@SRX7054672@SRX2355083@SRX2355081@SRX2355085
TRUE	chr2	11879148	11879398	LPIN1	29	chr2:11879138-11879445@chr2:11879157-11879388@chr2:11879174-11879479@chr2:11879179-11879338@chr2:11879179-11879484@chr2:11879184-11879454@chr2:11879185-11879441@chr2:11879195-11879431@chr2:11879198-11879465@chr2:11879199-11879454@chr2:11879201-11879446@chr2:11879203-11879401@chr2:11879206-11879387@chr2:11879213-11879457@chr2:11879215-11879397@chr2:11879215-11879435@chr2:11879221-11879454@chr2:118…	Cardiovascular@Adipocyte@Cardiovascular@Adipocyte@Cardiovascular@Cardiovascular@Cardiovascular@Cardiovascular@Cardiovascular@Cardiovascular@Cardiovascular@Cardiovascular@Cardiovascular@Cardiovascular@Cardiovascular@Cardiovascular@Cardiovascular@Cardiovascular@Cardiovascular@Cardiovascular@Cardiovascular@Cardiovascular@Cardiovascular@Cardiovascular@Cardiovascular@Cardiovascular@Cardiovascular@Card…	SRX7054661@SRX813773@SRX7054666@SRX813772@SRX7055007@SRX7054619@SRX7054611@SRX7054663@SRX7055004@SRX7054617@SRX7054614@SRX2355085@SRX7054621@SRX7054671@SRX2355081@SRX7054616@SRX7055008@SRX7054670@SRX7054615@SRX7054657@SRX7055006@SRX7054664@SRX7054659@SRX7054668@SRX7054662@SRX2207672@SRX7054609@SRX7054622@SRX7054672
FALSE	chr1	47496777	47497027	CYP4X1	29	chr1:47496751-47497065@chr1:47496751-47497074@chr1:47496761-47497073@chr1:47496762-47497035@chr1:47496763-47497107@chr1:47496765-47497070@chr1:47496771-47497005@chr1:47496774-47497053@chr1:47496781-47497079@chr1:47496784-47497032@chr1:47496785-47497050@chr1:47496786-47497040@chr1:47496793-47497055@chr1:47496794-47497041@chr1:47496794-47497057@chr1:47496795-47497031@chr1:47496796-47497041@chr1:474…	Cardiovascular@Cardiovascular@Cardiovascular@Cardiovascular@Others@Cardiovascular@Cardiovascular@Cardiovascular@Cardiovascular@Cardiovascular@Cardiovascular@Uterus@Cardiovascular@Cardiovascular@Cardiovascular@Cardiovascular@Cardiovascular@Cardiovascular@Cardiovascular@Cardiovascular@Cardiovascular@Cardiovascular@Cardiovascular@Cardiovascular@Cardiovascular@Cardiovascular@Cardiovascular@Cardiovasc…	SRX7054621@SRX7054617@SRX7054657@SRX7055006@SRX2404135@SRX7054671@SRX7054664@SRX7054661@SRX2207672@SRX7055008@SRX7054611@SRX027913@SRX7055007@SRX7054622@SRX2207673@SRX7054609@SRX7054666@SRX7054615@SRX7054663@SRX7054618@SRX7055004@SRX2207671@SRX7054616@SRX7054614@SRX7054667@SRX7054670@SRX2355085@SRX2355078@SRX7054619
TRUE	chr19	36504195	36506195	ALKBH6	29	chr19:36504942-36505487@chr19:36504957-36505172@chr19:36504964-36505497@chr19:36504974-36505161@chr19:36504983-36505093@chr19:36505045-36505207@chr19:36505084-36505359@chr19:36505092-36505304@chr19:36505099-36505317@chr19:36505120-36505279@chr19:36505121-36505583@chr19:36505141-36505471@chr19:36505147-36505304@chr19:36505154-36505544@chr19:36505170-36505460@chr19:36505207-36505639@chr19:36505222-…	Cardiovascular@Blood@Digestive%20tract@Blood@Blood@Blood@Cardiovascular@Cardiovascular@Cardiovascular@Cardiovascular@Cardiovascular@Cardiovascular@Cardiovascular@Blood@Cardiovascular@Others@Cardiovascular@Cardiovascular@Kidney@Blood@Cardiovascular@Cardiovascular@Cardiovascular@Breast@Cardiovascular@Blood@Blood@Blood@Blood	SRX7054666@SRX150605@SRX359916@SRX150608@SRX150365@SRX2837382@SRX2355078@SRX7054662@SRX7054657@SRX7054672@SRX7054661@SRX7054611@SRX7054671@SRX1460848@SRX7055006@SRX5938177@SRX2355085@SRX2355081@SRX2055843@SRX1460847@SRX7054619@SRX2207672@SRX2207673@SRX968976@SRX7054614@SRX150605@SRX150362@SRX150610@SRX150608
FALSE	chr14	23624518	23624768	SLC7A8	28	chr14:23624425-23624774@chr14:23624443-23624797@chr14:23624462-23624735@chr14:23624469-23624742@chr14:23624473-23624742@chr14:23624482-23624737@chr14:23624486-23624736@chr14:23624486-23624758@chr14:23624488-23624740@chr14:23624493-23624774@chr14:23624499-23624780@chr14:23624515-23624744@chr14:23624518-23624703@chr14:23624519-23624748@chr14:23624522-23624765@chr14:23624524-23624747@chr14:23624527-…	Cardiovascular@Cardiovascular@Cardiovascular@Cardiovascular@Cardiovascular@Cardiovascular@Cardiovascular@Cardiovascular@Cardiovascular@Cardiovascular@Cardiovascular@Cardiovascular@Cardiovascular@Cardiovascular@Cardiovascular@Cardiovascular@Cardiovascular@Cardiovascular@Cardiovascular@Cardiovascular@Cardiovascular@Cardiovascular@Cardiovascular@Cardiovascular@Cardiovascular@Cardiovascular@Cardiovas…	SRX7054671@SRX2207673@SRX7054619@SRX7054614@SRX7054666@SRX7054664@SRX7055006@SRX2207672@SRX7055007@SRX7054617@SRX7054661@SRX7054670@SRX2355085@SRX7054615@SRX7054621@SRX7054662@SRX7054611@SRX7054657@SRX7054616@SRX7055004@SRX7054609@SRX7054663@SRX7054668@SRX7054622@SRX7054659@SRX7055008@SRX7054623@SRX7054672
TRUE	chr18	46517046	46517296	SMAD7	28	chr18:46517077-46517396@chr18:46517086-46517341@chr18:46517091-46517542@chr18:46517094-46517488@chr18:46517108-46517379@chr18:46517113-46517324@chr18:46517114-46517414@chr18:46517114-46517571@chr18:46517121-46517450@chr18:46517130-46517482@chr18:46517132-46517406@chr18:46517136-46517359@chr18:46517137-46517454@chr18:46517138-46517445@chr18:46517152-46517374@chr18:46517155-46517656@chr18:46517156-…	Lung@Lung@Cardiovascular@Cardiovascular@Cardiovascular@Kidney@Others@Breast@Others@Breast@Others@Cardiovascular@Breast@Cardiovascular@Cardiovascular@Breast@Cardiovascular@Cardiovascular@Cardiovascular@Cardiovascular@Cardiovascular@Cardiovascular@Cardiovascular@Cardiovascular@Cardiovascular@Breast@Breast@Breast	SRX1672133@SRX212183@SRX2207673@SRX2207672@SRX7054661@SRX3636885@SRX5938177@SRX968977@SRX2404132@SRX968976@SRX2404134@SRX7054619@SRX968978@SRX7054617@SRX7055007@SRX968971@SRX7054671@SRX7054614@SRX4947721@SRX7054664@SRX7054657@SRX7054618@SRX2355085@SRX7054666@SRX7054609@SRX968973@SRX747790@SRX747789
FALSE	chr5	172193240	172193490	DUSP1	28	chr5:172193115-172193770@chr5:172193144-172193735@chr5:172193237-172193688@chr5:172193241-172193598@chr5:172193252-172193658@chr5:172193278-172193718@chr5:172193287-172193662@chr5:172193293-172193717@chr5:172193294-172193717@chr5:172193299-172193503@chr5:172193305-172193472@chr5:172193310-172193513@chr5:172193315-172193675@chr5:172193316-172193510@chr5:172193317-172193599@chr5:172193328-172193535…	Cardiovascular@Cardiovascular@Cardiovascular@Cardiovascular@Cardiovascular@Cardiovascular@Cardiovascular@Cardiovascular@Cardiovascular@Cardiovascular@Cardiovascular@Cardiovascular@Cardiovascular@Cardiovascular@Cardiovascular@Cardiovascular@Cardiovascular@Cardiovascular@Cardiovascular@Cardiovascular@Cardiovascular@Cardiovascular@Cardiovascular@Cardiovascular@Cardiovascular@Cardiovascular@Cardiovas…	SRX2207672@SRX2207673@SRX7054661@SRX7054616@SRX7054671@SRX7054614@SRX7054615@SRX7054618@SRX7054621@SRX7054667@SRX7055008@SRX7054670@SRX7055006@SRX7054664@SRX7054660@SRX2355079@SRX7054666@SRX7054657@SRX7054611@SRX7055004@SRX2355078@SRX7054668@SRX7054663@SRX7055007@SRX7054662@SRX7054617@SRX7054622@SRX7054619
TRUE	chr11	66821438	66823438	RHOD	28	chr11:66821965-66822282@chr11:66822066-66822268@chr11:66822498-66822725@chr11:66822499-66822763@chr11:66822508-66822753@chr11:66822517-66822793@chr11:66822519-66822753@chr11:66822523-66822905@chr11:66822525-66822769@chr11:66822525-66822836@chr11:66822532-66822767@chr11:66822544-66822730@chr11:66822548-66822783@chr11:66822549-66822794@chr11:66822554-66822715@chr11:66822555-66822746@chr11:66822559-…	Kidney@Digestive%20tract@Cardiovascular@Cardiovascular@Cardiovascular@Cardiovascular@Cardiovascular@Others@Cardiovascular@Others@Cardiovascular@Cardiovascular@Cardiovascular@Uterus@Cardiovascular@Cardiovascular@Cardiovascular@Cardiovascular@Cardiovascular@Cardiovascular@Others@Cardiovascular@Others@Breast@Breast@Others@Others@Others	SRX2055843@SRX3102571@SRX7054661@SRX7054614@SRX7054615@SRX2207672@SRX7055007@SRX5938177@SRX7054657@SRX2404134@SRX7054671@SRX2355083@SRX2207673@SRX027912@SRX7054667@SRX2355085@SRX2355081@SRX7054666@SRX7054670@SRX2355078@SRX2404135@SRX7054664@SRX2404133@SRX968971@SRX968976@SRX2404141@SRX2404140@SRX2404132
TRUE	chr11	94500957	94502957	AMOTL1	28	chr11:94501037-94501553@chr11:94501038-94501555@chr11:94501048-94501464@chr11:94501233-94501460@chr11:94501247-94501646@chr11:94501264-94501497@chr11:94501270-94501466@chr11:94501273-94501597@chr11:94501300-94501591@chr11:94501303-94501628@chr11:94501317-94501589@chr11:94501341-94501579@chr11:94501346-94501510@chr11:94501362-94501541@chr11:94501375-94501602@chr11:94501377-94501598@chr11:94501380-…	Cardiovascular@Cardiovascular@Others@Cardiovascular@Cardiovascular@Kidney@Cardiovascular@Cardiovascular@Cardiovascular@Cardiovascular@Cardiovascular@Cardiovascular@Cardiovascular@Cardiovascular@Cardiovascular@Cardiovascular@Cardiovascular@Cardiovascular@Cardiovascular@Cardiovascular@Blood@Cardiovascular@Cardiovascular@Cardiovascular@Cardiovascular@Cardiovascular@Cardiovascular@Cardiovascular	SRX2207672@SRX2207673@SRX2404132@SRX7054661@SRX7054614@SRX2055843@SRX2355085@SRX7054615@SRX7054666@SRX7054671@SRX7054619@SRX7055007@SRX7054663@SRX7055004@SRX7054618@SRX7054670@SRX7055008@SRX7054621@SRX7054609@SRX2355078@SRX4001967@SRX7054662@SRX7054664@SRX7054672@SRX7055007@SRX7054664@SRX2207673@SRX2207672
FALSE	chr16	56484591	56486591	OGFOD1	28	chr16:56484927-56485774@chr16:56485082-56485464@chr16:56485112-56485448@chr16:56485115-56485290@chr16:56485115-56485392@chr16:56485146-56485464@chr16:56485166-56485417@chr16:56485171-56485409@chr16:56485173-56485510@chr16:56485184-56485450@chr16:56485188-56485601@chr16:56485195-56485392@chr16:56485195-56485415@chr16:56485201-56485474@chr16:56485205-56485482@chr16:56485208-56485467@chr16:56485211-…	Digestive%20tract@Cardiovascular@Cardiovascular@Blood@Cardiovascular@Cardiovascular@Cardiovascular@Cardiovascular@Cardiovascular@Blood@Cardiovascular@Cardiovascular@Cardiovascular@Cardiovascular@Cardiovascular@Cardiovascular@Cardiovascular@Blood@Cardiovascular@Cardiovascular@Cardiovascular@Others@Cardiovascular@Cardiovascular@Cardiovascular@Cardiovascular@Cardiovascular@Blood	SRX359916@SRX7054615@SRX7054670@SRX150608@SRX7054657@SRX7054614@SRX7055007@SRX7054611@SRX2355085@SRX150605@SRX2207672@SRX7055006@SRX7054621@SRX7054661@SRX7054671@SRX7054663@SRX7054664@SRX1460848@SRX2207673@SRX7054617@SRX2355083@SRX5938177@SRX7054618@SRX7054666@SRX7054609@SRX2355078@SRX2355081@SRX150610
FALSE	chr5	79550701	79552701	SERINC5	28	chr5:79551341-79551560@chr5:79551353-79551596@chr5:79551383-79551614@chr5:79551398-79551574@chr5:79551412-79551587@chr5:79551763-79551926@chr5:79551849-79552046@chr5:79551892-79552066@chr5:79551919-79552079@chr5:79551946-79552213@chr5:79551950-79552108@chr5:79551958-79552097@chr5:79551960-79552129@chr5:79551960-79552161@chr5:79551981-79552206@chr5:79551990-79552169@chr5:79551998-79552160@chr5:795…	Cardiovascular@Cardiovascular@Cardiovascular@Cardiovascular@Cardiovascular@Cardiovascular@Cardiovascular@Cardiovascular@Cardiovascular@Cardiovascular@Cardiovascular@Cardiovascular@Cardiovascular@Cardiovascular@Cardiovascular@Cardiovascular@Blood@Cardiovascular@Cardiovascular@Cardiovascular@Cardiovascular@Cardiovascular@Cardiovascular@Bone@Blood@Blood@Bone@Cardiovascular	SRX2207673@SRX2207672@SRX7054666@SRX7054671@SRX7055007@SRX7054671@SRX2355079@SRX2355078@SRX2355085@SRX7054615@SRX7054609@SRX7054659@SRX7055007@SRX2207673@SRX7054664@SRX7055008@SRX1460848@SRX7054614@SRX7054611@SRX7055004@SRX7054661@SRX7054671@SRX7054670@SRX3638907@SRX150605@SRX150608@SRX3638911@SRX7054617
FALSE	chr19	47818656	47818906	C5AR2	27	chr19:47818527-47818825@chr19:47818573-47818934@chr19:47818605-47818907@chr19:47818610-47818850@chr19:47818612-47818827@chr19:47818612-47818859@chr19:47818613-47818815@chr19:47818622-47818917@chr19:47818623-47818936@chr19:47818625-47818893@chr19:47818627-47818882@chr19:47818637-47818879@chr19:47818637-47818884@chr19:47818638-47818826@chr19:47818638-47818836@chr19:47818638-47818848@chr19:47818645-…	Blood@Others@Cardiovascular@Cardiovascular@Cardiovascular@Cardiovascular@Cardiovascular@Cardiovascular@Uterus@Uterus@Cardiovascular@Cardiovascular@Cardiovascular@Cardiovascular@Cardiovascular@Cardiovascular@Cardiovascular@Cardiovascular@Cardiovascular@Cardiovascular@Cardiovascular@Cardiovascular@Cardiovascular@Lung@Cardiovascular@Cardiovascular@Adipocyte	SRX4001967@SRX5938177@SRX2207673@SRX7054619@SRX7054615@SRX2207672@SRX7054622@SRX7054661@SRX027913@SRX027912@SRX7055007@SRX7054614@SRX7054666@SRX7054618@SRX2355081@SRX7055006@SRX7054611@SRX7054616@SRX7055004@SRX7054664@SRX7054670@SRX7054621@SRX7054657@SRX212183@SRX7054671@SRX7054659@SRX813774
TRUE	chr2	75834106	75834356	MRPL19	27	chr2:75833923-75834434@chr2:75833950-75834267@chr2:75833950-75834272@chr2:75833971-75834217@chr2:75833972-75834270@chr2:75833973-75834200@chr2:75833977-75834279@chr2:75833979-75834398@chr2:75833983-75834229@chr2:75833985-75834183@chr2:75833985-75834420@chr2:75833988-75834191@chr2:75833995-75834205@chr2:75834005-75834365@chr2:75834005-75834432@chr2:75834009-75834200@chr2:75834010-75834202@chr2:758…	Kidney@Cardiovascular@Cardiovascular@Cardiovascular@Cardiovascular@Cardiovascular@Lung@Kidney@Cardiovascular@Cardiovascular@Kidney@Cardiovascular@Cardiovascular@Breast@Lung@Cardiovascular@Cardiovascular@Others@Cardiovascular@Blood@Others@Cardiovascular@Cardiovascular@Cardiovascular@Cardiovascular@Cardiovascular@Adipocyte	SRX3636885@SRX2207672@SRX2207673@SRX7054617@SRX7054671@SRX425264@SRX1672133@SRX3346352@SRX7054623@SRX425263@SRX2055843@SRX7054664@SRX7054624@SRX1100313@SRX212183@SRX7054616@SRX7054618@SRX2404132@SRX7054672@SRX4001967@SRX5938177@SRX4947721@SRX7054619@SRX7054663@SRX4947720@SRX112016@SRX813774
TRUE	chr14	24437882	24439882	DHRS4L2	27	chr14:24438493-24438862@chr14:24438503-24438853@chr14:24438544-24438785@chr14:24438549-24438796@chr14:24438554-24438776@chr14:24438557-24438765@chr14:24438562-24438801@chr14:24438567-24438799@chr14:24438568-24438770@chr14:24438583-24438764@chr14:24438590-24438780@chr14:24438591-24438785@chr14:24438594-24438757@chr14:24438598-24438818@chr14:24438599-24438771@chr14:24438601-24438761@chr14:24438603-…	Cardiovascular@Cardiovascular@Blood@Blood@Cardiovascular@Adipocyte@Blood@Cardiovascular@Blood@Blood@Blood@Lung@Blood@Blood@Blood@Prostate@Blood@Prostate@Cardiovascular@Cardiovascular@Blood@Cardiovascular@Blood@Uterus@Uterus@Blood@Cardiovascular	SRX2207672@SRX2207673@SRX017912@SRX150353@SRX2355085@SRX813774@SRX2837382@SRX4947721@SRX017871@SRX150359@SRX150606@SRX212183@SRX150610@SRX150605@SRX017895@SRX1885170@SRX150365@SRX1885169@SRX7054661@SRX4947720@SRX150557@SRX112016@SRX150608@SRX378804@SRX378805@SRX1460848@SRX7054671
FALSE	chr3	151986315	151988315	MBNL1-AS1	27	chr3:151986388-151986931@chr3:151986389-151986983@chr3:151986397-151986596@chr3:151986409-151986581@chr3:151986417-151986597@chr3:151986422-151986974@chr3:151986423-151986706@chr3:151986429-151986982@chr3:151986438-151986810@chr3:151986439-151986823@chr3:151986454-151986706@chr3:151986460-151986921@chr3:151986595-151986784@chr3:151986626-151986747@chr3:151986649-151986982@chr3:151986658-151986884…	Cardiovascular@Kidney@Cardiovascular@Cardiovascular@Cardiovascular@Cardiovascular@Liver@Cardiovascular@Cardiovascular@Cardiovascular@Cardiovascular@Cardiovascular@Cardiovascular@Liver@Cardiovascular@Blood@Blood@Cardiovascular@Blood@Blood@Blood@Blood@Blood@Blood@Blood@Blood@Blood	SRX7054614@SRX2055843@SRX7054671@SRX7055004@SRX2207672@SRX7054661@SRX2270129@SRX7055007@SRX7054621@SRX7054616@SRX425264@SRX7054664@SRX2355078@SRX2270128@SRX7054670@SRX150605@SRX017912@SRX7054615@SRX150608@SRX1460848@SRX017878@SRX150365@SRX150362@SRX150353@SRX150606@SRX017859@SRX150557
TRUE	chr7	86973700	86975700	CROT	27	chr7:86973720-86973877@chr7:86974472-86975091@chr7:86974474-86975260@chr7:86974608-86974957@chr7:86974609-86974794@chr7:86974609-86974846@chr7:86974617-86974821@chr7:86974638-86974908@chr7:86974640-86974777@chr7:86974651-86974961@chr7:86974654-86974859@chr7:86974660-86975029@chr7:86974664-86975098@chr7:86974680-86975104@chr7:86974713-86975007@chr7:86974732-86974971@chr7:86974736-86975022@chr7:869…	Adipocyte@Kidney@Digestive%20tract@Cardiovascular@Cardiovascular@Cardiovascular@Bone@Cardiovascular@Blood@Cardiovascular@Cardiovascular@Cardiovascular@Cardiovascular@Cardiovascular@Cardiovascular@Cardiovascular@Cardiovascular@Cardiovascular@Cardiovascular@Cardiovascular@Cardiovascular@Uterus@Cardiovascular@Blood@Blood@Bone@Blood	SRX813774@SRX2055843@SRX359916@SRX7054657@SRX7054617@SRX7054664@SRX3638907@SRX2207672@SRX150605@SRX7054661@SRX7054615@SRX7055007@SRX7054614@SRX7054611@SRX2207673@SRX7054666@SRX7054616@SRX7054662@SRX7054667@SRX7054670@SRX7054671@SRX378804@SRX2355085@SRX1460848@SRX150605@SRX3638907@SRX150608
TRUE	chr12	112211772	112212022	ALDH2	26	chr12:112211623-112211913@chr12:112211653-112211893@chr12:112211654-112211975@chr12:112211656-112211995@chr12:112211733-112211991@chr12:112211738-112212050@chr12:112211742-112212009@chr12:112211752-112212017@chr12:112211762-112212095@chr12:112211769-112211951@chr12:112211769-112212004@chr12:112211771-112212027@chr12:112211779-112211986@chr12:112211784-112211937@chr12:112211793-112211999@chr12:112…	Lung@Adipocyte@Adipocyte@Adipocyte@Blood@Blood@Blood@Blood@Blood@Digestive%20tract@Blood@Blood@Blood@Blood@Blood@Lung@Blood@Blood@Blood@Blood@Blood@Blood@Blood@Blood@Blood@Blood	SRX212183@SRX813772@SRX813774@SRX813773@SRX017913@SRX2837382@SRX150605@SRX150557@SRX4001967@SRX3102571@SRX017912@SRX150353@SRX150606@SRX017908@SRX017871@SRX1672130@SRX150362@SRX150610@SRX150365@SRX150359@SRX017906@SRX017865@SRX017895@SRX017870@SRX017860@SRX017859
FALSE	chr19	56826086	56826336	ZNF542P	26	chr19:56825767-56826413@chr19:56825769-56826244@chr19:56825772-56826405@chr19:56825814-56826210@chr19:56825852-56826236@chr19:56825860-56826787@chr19:56825913-56826459@chr19:56825926-56826253@chr19:56825931-56826138@chr19:56825939-56826208@chr19:56825945-56826186@chr19:56826005-56826210@chr19:56826012-56826470@chr19:56826015-56826170@chr19:56826055-56826237@chr19:56826071-56826254@chr19:56826084-…	Cardiovascular@Cardiovascular@Cardiovascular@Cardiovascular@Cardiovascular@Digestive%20tract@Cardiovascular@Cardiovascular@Cardiovascular@Cardiovascular@Cardiovascular@Cardiovascular@Cardiovascular@Blood@Cardiovascular@Blood@Liver@Blood@Cardiovascular@Blood@Cardiovascular@Blood@Blood@Blood@Cardiovascular@Cardiovascular	SRX7054661@SRX2207672@SRX2207673@SRX7054614@SRX7054670@SRX359916@SRX7054617@SRX7054611@SRX7054657@SRX7055004@SRX7054615@SRX7054616@SRX7054666@SRX1460848@SRX7054622@SRX150605@SRX2270129@SRX150608@SRX7054667@SRX150353@SRX7054671@SRX150610@SRX150359@SRX017871@SRX7054657@SRX7054615
FALSE	chr3	23782608	23782858	UBE2E1	26	chr3:23782608-23782935@chr3:23782628-23782879@chr3:23782630-23782918@chr3:23782635-23782968@chr3:23782636-23782885@chr3:23782640-23782817@chr3:23782640-23782898@chr3:23782643-23782889@chr3:23782645-23782859@chr3:23782645-23782869@chr3:23782649-23782901@chr3:23782651-23782906@chr3:23782653-23782826@chr3:23782659-23782918@chr3:23782663-23782878@chr3:23782669-23782879@chr3:23782673-23782875@chr3:237…	Cardiovascular@Cardiovascular@Cardiovascular@Others@Cardiovascular@Cardiovascular@Cardiovascular@Others@Cardiovascular@Cardiovascular@Others@Cardiovascular@Cardiovascular@Cardiovascular@Cardiovascular@Cardiovascular@Cardiovascular@Cardiovascular@Cardiovascular@Cardiovascular@Cardiovascular@Cardiovascular@Cardiovascular@Cardiovascular@Cardiovascular@Cardiovascular	SRX2207673@SRX7054661@SRX2207672@SRX5938177@SRX7054671@SRX7054621@SRX7054614@SRX2404140@SRX7055007@SRX7054611@SRX2404135@SRX7054664@SRX7054616@SRX7054619@SRX7054617@SRX7054657@SRX7054670@SRX7054618@SRX7055008@SRX7054663@SRX7054615@SRX7054666@SRX7055004@SRX2207671@SRX7055006@SRX7054672
TRUE	chr17	17824599	17824849	TOM1L2	26	chr17:17824547-17824812@chr17:17824569-17824928@chr17:17824579-17824919@chr17:17824588-17824807@chr17:17824593-17824883@chr17:17824593-17824901@chr17:17824598-17824829@chr17:17824625-17824864@chr17:17824634-17825002@chr17:17824643-17824879@chr17:17824649-17824851@chr17:17824654-17824870@chr17:17824664-17824951@chr17:17824679-17824925@chr17:17824681-17824887@chr17:17824687-17824859@chr17:17824688-…	Digestive%20tract@Cardiovascular@Cardiovascular@Others@Others@Cardiovascular@Others@Cardiovascular@Cardiovascular@Cardiovascular@Cardiovascular@Cardiovascular@Cardiovascular@Cardiovascular@Cardiovascular@Cardiovascular@Cardiovascular@Cardiovascular@Cardiovascular@Cardiovascular@Cardiovascular@Lung@Cardiovascular@Cardiovascular@Cardiovascular@Cardiovascular	SRX3102571@SRX2207673@SRX2207672@SRX2404134@SRX2404132@SRX7054611@SRX5938177@SRX7054617@SRX7054666@SRX7054657@SRX7054621@SRX7054614@SRX7054661@SRX7054671@SRX2355085@SRX7054669@SRX7054668@SRX7055006@SRX7054618@SRX7054615@SRX7055007@SRX212183@SRX2355078@SRX7054662@SRX7054670@SRX7054616
FALSE	chr3	49481536	49481786	GPX1	26	chr3:49481461-49481704@chr3:49481487-49481733@chr3:49481491-49481733@chr3:49481500-49481752@chr3:49481504-49481689@chr3:49481508-49481741@chr3:49481510-49481697@chr3:49481513-49481679@chr3:49481518-49481784@chr3:49481521-49481705@chr3:49481527-49481662@chr3:49481545-49481718@chr3:49481546-49481738@chr3:49481562-49481743@chr3:49481565-49481730@chr3:49481566-49481827@chr3:49481572-49482081@chr3:494…	Cardiovascular@Cardiovascular@Cardiovascular@Cardiovascular@Cardiovascular@Cardiovascular@Cardiovascular@Cardiovascular@Blood@Cardiovascular@Cardiovascular@Blood@Cardiovascular@Blood@Blood@Blood@Kidney@Blood@Blood@Blood@Blood@Blood@Blood@Cardiovascular@Blood@Kidney	SRX7054670@SRX7054661@SRX2207673@SRX2207672@SRX7055007@SRX7054666@SRX7054662@SRX7054618@SRX150605@SRX7054611@SRX2355085@SRX150362@SRX7054671@SRX017913@SRX150353@SRX017912@SRX2055843@SRX150359@SRX150557@SRX150606@SRX017871@SRX150608@SRX150610@SRX7054621@SRX2837382@SRX3636885
FALSE	chr10	11581416	11581666	USP6NL	25	chr10:11581354-11581738@chr10:11581361-11581626@chr10:11581383-11581600@chr10:11581391-11581738@chr10:11581401-11581682@chr10:11581405-11581717@chr10:11581421-11581649@chr10:11581423-11581612@chr10:11581423-11581693@chr10:11581428-11581751@chr10:11581436-11581706@chr10:11581437-11581699@chr10:11581442-11581671@chr10:11581443-11581645@chr10:11581445-11581636@chr10:11581447-11581702@chr10:11581449-…	Cardiovascular@Cardiovascular@Cardiovascular@Cardiovascular@Cardiovascular@Cardiovascular@Cardiovascular@Cardiovascular@Cardiovascular@Cardiovascular@Cardiovascular@Cardiovascular@Cardiovascular@Cardiovascular@Cardiovascular@Cardiovascular@Cardiovascular@Cardiovascular@Cardiovascular@Cardiovascular@Cardiovascular@Cardiovascular@Cardiovascular@Cardiovascular@Lung	SRX7054614@SRX7054617@SRX7054668@SRX7055007@SRX7054615@SRX7054661@SRX7054616@SRX7054611@SRX2207672@SRX7054666@SRX7054659@SRX7054671@SRX7054663@SRX7054657@SRX7054621@SRX2207673@SRX7054670@SRX7055004@SRX7055005@SRX7054609@SRX7055006@SRX7054667@SRX7054664@SRX7054619@SRX212183
FALSE	chr20	23251237	23251487	GZF1	25	chr20:23250989-23251536@chr20:23251001-23251538@chr20:23251032-23251453@chr20:23251057-23251481@chr20:23251060-23251368@chr20:23251067-23251468@chr20:23251075-23251512@chr20:23251077-23251296@chr20:23251080-23251477@chr20:23251095-23251359@chr20:23251117-23251447@chr20:23251125-23251405@chr20:23251136-23251423@chr20:23251160-23251378@chr20:23251164-23251514@chr20:23251165-23251402@chr20:23251166-…	Cardiovascular@Cardiovascular@Cardiovascular@Cardiovascular@Cardiovascular@Cardiovascular@Cardiovascular@Cardiovascular@Cardiovascular@Cardiovascular@Cardiovascular@Cardiovascular@Cardiovascular@Cardiovascular@Cardiovascular@Cardiovascular@Cardiovascular@Cardiovascular@Cardiovascular@Cardiovascular@Cardiovascular@Cardiovascular@Cardiovascular@Cardiovascular@Cardiovascular	SRX2207673@SRX2207672@SRX7054618@SRX7055008@SRX7054657@SRX7054671@SRX7054663@SRX425264@SRX7054615@SRX7055006@SRX7054661@SRX7055005@SRX7055007@SRX7054617@SRX7054667@SRX7054621@SRX7054666@SRX7054672@SRX2355083@SRX2355079@SRX7054664@SRX7054609@SRX7054613@SRX7054668@SRX2355081
TRUE	chr6	99318986	99319236	FBXL4	25	chr6:99318947-99319333@chr6:99318957-99319260@chr6:99318958-99319328@chr6:99318960-99319291@chr6:99318961-99319315@chr6:99318963-99319268@chr6:99318965-99319301@chr6:99318966-99319295@chr6:99318969-99319266@chr6:99318974-99319245@chr6:99318975-99319253@chr6:99318981-99319228@chr6:99318982-99319232@chr6:99318984-99319244@chr6:99318990-99319274@chr6:99318991-99319263@chr6:99318996-99319220@chr6:993…	Cardiovascular@Cardiovascular@Cardiovascular@Cardiovascular@Cardiovascular@Cardiovascular@Cardiovascular@Cardiovascular@Cardiovascular@Cardiovascular@Cardiovascular@Cardiovascular@Cardiovascular@Cardiovascular@Cardiovascular@Cardiovascular@Others@Cardiovascular@Cardiovascular@Cardiovascular@Cardiovascular@Cardiovascular@Cardiovascular@Cardiovascular@Prostate	SRX7054664@SRX7054671@SRX7054618@SRX7054657@SRX2207672@SRX7055006@SRX7054666@SRX7055004@SRX7054670@SRX7054662@SRX7054663@SRX7054661@SRX7054621@SRX7055007@SRX7054622@SRX7054617@SRX5938177@SRX7054609@SRX7054611@SRX7054616@SRX7054615@SRX7054619@SRX2207673@SRX7054668@SRX1885200
FALSE	chr11	62275970	62276220	TUT1	24	chr11:62275800-62276054@chr11:62275872-62276101@chr11:62275874-62276312@chr11:62275909-62276299@chr11:62275932-62276208@chr11:62275943-62276248@chr11:62275959-62276237@chr11:62275961-62276179@chr11:62275965-62276237@chr11:62275966-62276136@chr11:62275976-62276221@chr11:62275977-62276219@chr11:62275981-62276211@chr11:62275984-62276237@chr11:62275986-62276255@chr11:62275997-62276491@chr11:62275998-…	Uterus@Adipocyte@Cardiovascular@Cardiovascular@Cardiovascular@Cardiovascular@Cardiovascular@Cardiovascular@Cardiovascular@Cardiovascular@Cardiovascular@Cardiovascular@Cardiovascular@Cardiovascular@Cardiovascular@Others@Cardiovascular@Cardiovascular@Cardiovascular@Kidney@Cardiovascular@Cardiovascular@Cardiovascular@Breast	SRX027913@SRX813773@SRX7054661@SRX7054666@SRX7055006@SRX7054621@SRX2355085@SRX7054667@SRX2207673@SRX2355081@SRX7055007@SRX2355078@SRX7054619@SRX7054616@SRX7054614@SRX5938177@SRX7054618@SRX7055004@SRX7054615@SRX2055843@SRX7054617@SRX7054671@SRX2207672@SRX968976
FALSE	chr17	67265378	67265628	ABCA10	24	chr17:67265188-67265415@chr17:67265303-67265896@chr17:67265359-67265938@chr17:67265431-67265956@chr17:67265475-67265818@chr17:67265484-67266212@chr17:67265485-67266220@chr17:67265488-67266171@chr17:67265496-67265950@chr17:67265511-67265828@chr17:67265512-67265934@chr17:67265552-67265861@chr17:67265560-67266138@chr17:67265570-67266193@chr17:67265571-67265891@chr17:67265577-67266205@chr17:67265581-…	Adipocyte@Cardiovascular@Others@Cardiovascular@Others@Cardiovascular@Cardiovascular@Cardiovascular@Others@Cardiovascular@Others@Cardiovascular@Cardiovascular@Cardiovascular@Cardiovascular@Cardiovascular@Cardiovascular@Cardiovascular@Cardiovascular@Cardiovascular@Cardiovascular@Cardiovascular@Cardiovascular@Cardiovascular	SRX813774@SRX7055007@SRX2404135@SRX7054671@SRX2404139@SRX7054661@SRX7054666@SRX7054615@SRX2404140@SRX7054619@SRX5938177@SRX7055004@SRX7054611@SRX7054670@SRX7055008@SRX7054657@SRX7054663@SRX7054660@SRX2207672@SRX7054621@SRX2355083@SRX7054617@SRX7054616@SRX7054662
FALSE	chr17	73675887	73676137	SMIM5	24	chr17:73675829-73676196@chr17:73675841-73676155@chr17:73675845-73676205@chr17:73675860-73676208@chr17:73675870-73676192@chr17:73675871-73676159@chr17:73675882-73676190@chr17:73675893-73676166@chr17:73675894-73676214@chr17:73675900-73676167@chr17:73675902-73676130@chr17:73675918-73676177@chr17:73675924-73676157@chr17:73675925-73676204@chr17:73675930-73676148@chr17:73675932-73676181@chr17:73675935-…	Cardiovascular@Cardiovascular@Cardiovascular@Cardiovascular@Cardiovascular@Cardiovascular@Cardiovascular@Cardiovascular@Cardiovascular@Cardiovascular@Cardiovascular@Cardiovascular@Cardiovascular@Cardiovascular@Cardiovascular@Cardiovascular@Cardiovascular@Cardiovascular@Cardiovascular@Cardiovascular@Uterus@Cardiovascular@Cardiovascular@Cardiovascular	SRX2207672@SRX7054666@SRX7054657@SRX2207673@SRX7054661@SRX2207671@SRX7055007@SRX7054663@SRX7054669@SRX7054621@SRX7054619@SRX7054670@SRX7055004@SRX7054671@SRX7054609@SRX7054611@SRX7055006@SRX7054667@SRX7054664@SRX7054617@SRX027912@SRX7054658@SRX7055008@SRX7054659
FALSE	chr1	52102826	52103076	OSBPL9	24	chr1:52102667-52103103@chr1:52102789-52103095@chr1:52102804-52103130@chr1:52102813-52103100@chr1:52102816-52103043@chr1:52102817-52103077@chr1:52102818-52103052@chr1:52102822-52103073@chr1:52102824-52103008@chr1:52102839-52103052@chr1:52102839-52103053@chr1:52102839-52103063@chr1:52102840-52103003@chr1:52102842-52103034@chr1:52102845-52103070@chr1:52102848-52103042@chr1:52102848-52103065@chr1:521…	Others@Cardiovascular@Cardiovascular@Cardiovascular@Cardiovascular@Cardiovascular@Others@Cardiovascular@Cardiovascular@Cardiovascular@Cardiovascular@Cardiovascular@Lung@Cardiovascular@Cardiovascular@Cardiovascular@Cardiovascular@Cardiovascular@Cardiovascular@Cardiovascular@Cardiovascular@Cardiovascular@Cardiovascular@Cardiovascular	SRX5938177@SRX2207672@SRX7054662@SRX2207673@SRX7054611@SRX7054664@SRX2404134@SRX7054614@SRX7054666@SRX7054617@SRX7054618@SRX7054657@SRX212183@SRX7054671@SRX7054616@SRX2355079@SRX7054661@SRX7055007@SRX2355085@SRX7054663@SRX7054621@SRX7054670@SRX7055006@SRX7054615
FALSE	chr7	139975420	139975670	KDM7A	24	chr7:139975352-139975670@chr7:139975356-139975685@chr7:139975373-139975674@chr7:139975373-139975702@chr7:139975384-139975628@chr7:139975385-139975645@chr7:139975396-139975675@chr7:139975397-139975591@chr7:139975397-139975638@chr7:139975405-139975665@chr7:139975410-139975640@chr7:139975412-139975607@chr7:139975418-139975641@chr7:139975427-139975660@chr7:139975429-139975696@chr7:139975435-139975612…	Cardiovascular@Cardiovascular@Cardiovascular@Cardiovascular@Cardiovascular@Cardiovascular@Cardiovascular@Cardiovascular@Cardiovascular@Cardiovascular@Cardiovascular@Cardiovascular@Cardiovascular@Cardiovascular@Cardiovascular@Cardiovascular@Cardiovascular@Cardiovascular@Cardiovascular@Cardiovascular@Cardiovascular@Cardiovascular@Cardiovascular@Cardiovascular	SRX7054661@SRX7054614@SRX2207672@SRX7055007@SRX7055006@SRX2207673@SRX7054666@SRX7054611@SRX7055008@SRX7054621@SRX7054657@SRX7054667@SRX7054663@SRX2355085@SRX2355083@SRX7055004@SRX7054671@SRX7054622@SRX7054616@SRX7054619@SRX2355081@SRX7054670@SRX7054672@SRX7054664
TRUE	chr2	113932159	113934159	PSD4	24	chr2:113932799-113933097@chr2:113932802-113933133@chr2:113932810-113933027@chr2:113932818-113933026@chr2:113932823-113933079@chr2:113932824-113933111@chr2:113932826-113933092@chr2:113932828-113933097@chr2:113932834-113933069@chr2:113932841-113933009@chr2:113932846-113933041@chr2:113932849-113933104@chr2:113932852-113933008@chr2:113932854-113933019@chr2:113932856-113933008@chr2:113932858-113933080…	Blood@Blood@Blood@Blood@Blood@Blood@Blood@Blood@Blood@Blood@Blood@Blood@Blood@Blood@Blood@Blood@Blood@Blood@Blood@Blood@Blood@Blood@Blood@Blood	SRX150365@SRX150605@SRX017911@SRX017908@SRX150557@SRX150608@SRX017913@SRX150362@SRX017884@SRX1460847@SRX150353@SRX017912@SRX017871@SRX017878@SRX017879@SRX150610@SRX150606@SRX017895@SRX017891@SRX017897@SRX150361@SRX150359@SRX017877@SRX017859
FALSE	chr19	13261043	13261293	NACC1	23	chr19:13261074-13261310@chr19:13261087-13261347@chr19:13261095-13261321@chr19:13261100-13261309@chr19:13261105-13261281@chr19:13261108-13261339@chr19:13261118-13261354@chr19:13261119-13261326@chr19:13261121-13261233@chr19:13261121-13261294@chr19:13261121-13261299@chr19:13261121-13261333@chr19:13261121-13261358@chr19:13261123-13261323@chr19:13261123-13261344@chr19:13261125-13261286@chr19:13261132-…	Cardiovascular@Cardiovascular@Cardiovascular@Cardiovascular@Cardiovascular@Cardiovascular@Cardiovascular@Cardiovascular@Blood@Cardiovascular@Cardiovascular@Cardiovascular@Cardiovascular@Blood@Cardiovascular@Cardiovascular@Cardiovascular@Cardiovascular@Cardiovascular@Blood@Cardiovascular@Cardiovascular@Cardiovascular	SRX7054661@SRX7054615@SRX7054614@SRX7054611@SRX7054621@SRX2207672@SRX7054671@SRX2355085@SRX150365@SRX2355078@SRX7054664@SRX7055006@SRX7054668@SRX1460848@SRX7054670@SRX2207673@SRX7054666@SRX7054618@SRX7054622@SRX150610@SRX7055004@SRX2355081@SRX7055008
TRUE	chr2	106814344	106814594	UXS1	23	chr2:106814391-106814785@chr2:106814404-106814721@chr2:106814404-106814765@chr2:106814427-106814760@chr2:106814430-106814793@chr2:106814438-106814725@chr2:106814444-106814745@chr2:106814447-106814816@chr2:106814449-106814675@chr2:106814453-106814747@chr2:106814454-106814689@chr2:106814459-106814724@chr2:106814468-106814690@chr2:106814469-106814711@chr2:106814471-106814738@chr2:106814481-106814738…	Lung@Others@Kidney@Lung@Lung@Others@Others@Kidney@Adipocyte@Others@Cardiovascular@Cardiovascular@Cardiovascular@Cardiovascular@Others@Cardiovascular@Cardiovascular@Adipocyte@Adipocyte@Lung@Cardiovascular@Cardiovascular@Uterus	SRX212183@SRX5938177@SRX2055843@SRX1672133@SRX1672130@SRX2404134@SRX2404135@SRX3636885@SRX813773@SRX2404132@SRX2207672@SRX7055007@SRX7054666@SRX7054614@SRX2404140@SRX7054619@SRX367014@SRX813772@SRX813774@SRX1672129@SRX7054663@SRX367015@SRX027913
FALSE	chr22	51065001	51067001	ARSA	23	chr22:51066363-51066568@chr22:51066390-51066604@chr22:51066400-51066599@chr22:51066403-51066603@chr22:51066404-51066602@chr22:51066412-51066821@chr22:51066448-51066868@chr22:51066465-51066779@chr22:51066476-51066614@chr22:51066476-51066813@chr22:51066507-51066788@chr22:51066551-51066809@chr22:51066584-51066792@chr22:51066648-51066868@chr22:51066649-51066811@chr22:51066658-51066766@chr22:51066663-…	Cardiovascular@Cardiovascular@Cardiovascular@Cardiovascular@Cardiovascular@Cardiovascular@Cardiovascular@Cardiovascular@Cardiovascular@Cardiovascular@Cardiovascular@Cardiovascular@Cardiovascular@Cardiovascular@Cardiovascular@Uterus@Cardiovascular@Cardiovascular@Cardiovascular@Bone@Cardiovascular@Cardiovascular@Digestive%20tract	SRX7054661@SRX7054615@SRX2207672@SRX2207673@SRX7054671@SRX7054614@SRX7054664@SRX2355078@SRX7054609@SRX7054619@SRX7054667@SRX2355079@SRX2355085@SRX7054616@SRX7054621@SRX378804@SRX7054666@SRX7054611@SRX7054661@SRX3638907@SRX7054671@SRX7055007@SRX359916
TRUE	chrX	77589119	77589369	CYSLTR1	22	chrX:77589092-77589359@chrX:77589110-77589366@chrX:77589111-77589310@chrX:77589111-77589367@chrX:77589114-77589299@chrX:77589114-77589317@chrX:77589116-77589321@chrX:77589116-77589329@chrX:77589117-77589268@chrX:77589120-77589351@chrX:77589132-77589325@chrX:77589135-77589340@chrX:77589136-77589359@chrX:77589139-77589281@chrX:77589143-77589340@chrX:77589148-77589285@chrX:77589151-77589327@chrX:775…	Prostate@Prostate@Prostate@Blood@Blood@Blood@Prostate@Blood@Prostate@Blood@Blood@Blood@Blood@Blood@Prostate@Blood@Blood@Blood@Blood@Blood@Blood@Blood	SRX1885172@SRX1885171@SRX1885200@SRX150605@SRX017865@SRX150362@SRX1885170@SRX150557@SRX1885169@SRX017912@SRX150353@SRX2837382@SRX017913@SRX1460847@SRX1885199@SRX017863@SRX017871@SRX150365@SRX150606@SRX150608@SRX150359@SRX150610
FALSE	chr2	235959687	235959937	SH3BP4	22	chr2:235959620-235959892@chr2:235959649-235959912@chr2:235959653-235959903@chr2:235959655-235959951@chr2:235959659-235959929@chr2:235959670-235959954@chr2:235959680-235959905@chr2:235959680-235959951@chr2:235959681-235959859@chr2:235959681-235959913@chr2:235959682-235959935@chr2:235959683-235959876@chr2:235959685-235959931@chr2:235959688-235959915@chr2:235959698-235959959@chr2:235959702-235959878…	Others@Cardiovascular@Cardiovascular@Cardiovascular@Cardiovascular@Cardiovascular@Cardiovascular@Cardiovascular@Cardiovascular@Cardiovascular@Cardiovascular@Cardiovascular@Cardiovascular@Cardiovascular@Cardiovascular@Cardiovascular@Cardiovascular@Cardiovascular@Lung@Cardiovascular@Cardiovascular@Cardiovascular	SRX2404140@SRX425264@SRX7054657@SRX2207673@SRX7054664@SRX2207672@SRX7054617@SRX7054666@SRX7054670@SRX7054671@SRX7054615@SRX7054623@SRX7054662@SRX7054611@SRX7055007@SRX7054609@SRX7054618@SRX7054667@SRX212183@SRX7055006@SRX7054661@SRX2355085
FALSE	chr5	6419626	6419876	UBE2QL1	22	chr5:6419390-6419787@chr5:6419393-6419861@chr5:6419411-6419746@chr5:6419412-6419718@chr5:6419421-6419762@chr5:6419427-6419765@chr5:6419428-6419658@chr5:6419435-6419717@chr5:6419435-6419834@chr5:6419441-6419715@chr5:6419449-6419728@chr5:6419453-6419694@chr5:6419457-6419766@chr5:6419464-6419704@chr5:6419468-6419764@chr5:6419477-6419662@chr5:6419478-6419704@chr5:6419481-6419692@chr5:6419481-6419761@…	Cardiovascular@Cardiovascular@Cardiovascular@Cardiovascular@Cardiovascular@Cardiovascular@Cardiovascular@Cardiovascular@Others@Cardiovascular@Cardiovascular@Cardiovascular@Cardiovascular@Cardiovascular@Cardiovascular@Cardiovascular@Cardiovascular@Cardiovascular@Cardiovascular@Cardiovascular@Cardiovascular@Cardiovascular	SRX2207673@SRX2207672@SRX7054615@SRX7055008@SRX7055006@SRX7054671@SRX7054669@SRX425264@SRX5938177@SRX7054664@SRX7054661@SRX7054662@SRX7054657@SRX7054667@SRX7055007@SRX7054617@SRX7054611@SRX7054663@SRX7055004@SRX7054618@SRX7054609@SRX7054621
FALSE	chr6	134430754	134431004	SLC2A12	22	chr6:134430734-134430976@chr6:134430735-134430938@chr6:134430738-134430984@chr6:134430742-134431000@chr6:134430744-134430960@chr6:134430744-134430970@chr6:134430744-134430981@chr6:134430745-134430949@chr6:134430748-134430988@chr6:134430753-134430944@chr6:134430753-134430959@chr6:134430754-134430961@chr6:134430754-134430985@chr6:134430773-134430935@chr6:134430774-134430944@chr6:134430781-134430942…	Cardiovascular@Cardiovascular@Cardiovascular@Cardiovascular@Cardiovascular@Cardiovascular@Cardiovascular@Cardiovascular@Cardiovascular@Cardiovascular@Cardiovascular@Cardiovascular@Cardiovascular@Cardiovascular@Cardiovascular@Cardiovascular@Cardiovascular@Cardiovascular@Cardiovascular@Cardiovascular@Adipocyte@Cardiovascular	SRX2207673@SRX7054663@SRX7054671@SRX7054661@SRX7054657@SRX7054666@SRX7054615@SRX2207672@SRX7055007@SRX7054618@SRX7054616@SRX7054670@SRX7055006@SRX2355085@SRX7054662@SRX7054659@SRX7054621@SRX7055008@SRX7054613@SRX7054614@SRX813773@SRX7054668
TRUE	chr9	117111245	117111495	AKNA	22	chr9:117111018-117111438@chr9:117111060-117111516@chr9:117111096-117111449@chr9:117111096-117111506@chr9:117111147-117111478@chr9:117111148-117111519@chr9:117111167-117111513@chr9:117111183-117111283@chr9:117111198-117111417@chr9:117111205-117111497@chr9:117111209-117111461@chr9:117111209-117111520@chr9:117111214-117111360@chr9:117111215-117111443@chr9:117111218-117111423@chr9:117111226-117111416…	Kidney@Cardiovascular@Cardiovascular@Lung@Blood@Blood@Adipocyte@Blood@Adipocyte@Kidney@Blood@Blood@Blood@Blood@Blood@Blood@Blood@Blood@Blood@Blood@Blood@Blood	SRX2055843@SRX2207672@SRX2207673@SRX212183@SRX2837382@SRX150605@SRX813773@SRX150608@SRX813772@SRX3346352@SRX017912@SRX017913@SRX017906@SRX150557@SRX150362@SRX150610@SRX150606@SRX1460847@SRX017895@SRX017891@SRX4401063@SRX4401066
TRUE	chr2	220407537	220409537	CHPF	22	chr2:220407722-220407967@chr2:220407739-220407948@chr2:220408102-220408627@chr2:220408390-220408554@chr2:220408414-220408557@chr2:220408433-220408653@chr2:220408466-220408736@chr2:220408468-220408819@chr2:220408473-220408747@chr2:220408486-220408746@chr2:220408491-220408696@chr2:220408491-220408716@chr2:220408522-220408774@chr2:220408534-220408687@chr2:220408540-220408805@chr2:220408550-220408748…	Cardiovascular@Cardiovascular@Kidney@Uterus@Uterus@Blood@Cardiovascular@Cardiovascular@Cardiovascular@Cardiovascular@Adipocyte@Cardiovascular@Others@Cardiovascular@Cardiovascular@Blood@Cardiovascular@Cardiovascular@Cardiovascular@Cardiovascular@Cardiovascular@Cardiovascular	SRX2207673@SRX2207672@SRX3346352@SRX378804@SRX378805@SRX4001967@SRX7054661@SRX7054666@SRX7054671@SRX7054611@SRX813773@SRX7054614@SRX5938177@SRX7054667@SRX2207672@SRX2837382@SRX2355085@SRX7054618@SRX7054621@SRX7055006@SRX7054664@SRX7054615
TRUE	chr11	66789489	66791489	SYT12	22	chr11:66789737-66790673@chr11:66789765-66790239@chr11:66789788-66790221@chr11:66789794-66790222@chr11:66789809-66790231@chr11:66789814-66790250@chr11:66789816-66790284@chr11:66789825-66790165@chr11:66789828-66790246@chr11:66789860-66790170@chr11:66789860-66790184@chr11:66789861-66790160@chr11:66789872-66790112@chr11:66789884-66790111@chr11:66789886-66790113@chr11:66789888-66790146@chr11:66789902-…	Others@Others@Others@Others@Others@Others@Others@Others@Others@Cardiovascular@Others@Cardiovascular@Others@Others@Others@Others@Lung@Digestive%20tract@Uterus@Kidney@Breast@Cardiovascular	SRX5938177@SRX2404135@SRX2404133@SRX2404132@SRX2404137@SRX2404142@SRX2404140@SRX2404139@SRX2404134@SRX2207672@SRX2404141@SRX2207673@SRX2404127@SRX5938176@SRX2404125@SRX2404124@SRX1672133@SRX359916@SRX027912@SRX3636885@SRX968971@SRX2207672
TRUE	chr5	102090086	102092086	PAM	22	chr5:102090531-102091101@chr5:102090541-102090825@chr5:102090567-102091042@chr5:102090578-102090725@chr5:102090611-102090887@chr5:102090612-102090882@chr5:102090613-102091096@chr5:102090621-102091014@chr5:102090632-102091109@chr5:102090668-102090869@chr5:102090669-102091059@chr5:102090779-102090980@chr5:102090844-102091067@chr5:102090876-102091150@chr5:102090888-102091056@chr5:102090923-102091088…	Cardiovascular@Kidney@Cardiovascular@Cardiovascular@Cardiovascular@Cardiovascular@Cardiovascular@Cardiovascular@Cardiovascular@Cardiovascular@Cardiovascular@Cardiovascular@Blood@Cardiovascular@Cardiovascular@Cardiovascular@Liver@Cardiovascular@Cardiovascular@Cardiovascular@Cardiovascular@Cardiovascular	SRX2207672@SRX2055843@SRX2207673@SRX4947721@SRX7054663@SRX2355085@SRX7055007@SRX7054671@SRX7054614@SRX7055008@SRX7054664@SRX7054622@SRX1460848@SRX7054657@SRX7054609@SRX7054670@SRX2270129@SRX2207673@SRX7055007@SRX2207672@SRX7054616@SRX2355085
FALSE	chr12	25486839	25487089	KRAS	21	chr12:25486720-25487106@chr12:25486724-25487019@chr12:25486739-25486928@chr12:25486740-25487037@chr12:25486742-25486981@chr12:25486760-25486990@chr12:25486774-25487066@chr12:25486774-25487106@chr12:25486776-25487123@chr12:25486784-25486950@chr12:25486793-25487047@chr12:25486796-25487011@chr12:25486796-25487086@chr12:25486799-25487025@chr12:25486818-25487035@chr12:25486836-25487032@chr12:25486844-…	Others@Cardiovascular@Adipocyte@Cardiovascular@Cardiovascular@Cardiovascular@Cardiovascular@Cardiovascular@Cardiovascular@Adipocyte@Uterus@Cardiovascular@Cardiovascular@Others@Cardiovascular@Cardiovascular@Cardiovascular@Cardiovascular@Lung@Blood@Cardiovascular	SRX5938177@SRX7054657@SRX813773@SRX7055007@SRX7054614@SRX7054671@SRX7054666@SRX2207672@SRX2207673@SRX813772@SRX027912@SRX7054621@SRX7054618@SRX2404140@SRX7055006@SRX7054617@SRX7054664@SRX7054611@SRX212183@SRX4001967@SRX7055004
TRUE	chr1	6319685	6321685	GPR153	20	chr1:6320083-6320364@chr1:6320095-6320293@chr1:6320101-6320358@chr1:6320103-6320329@chr1:6320105-6320353@chr1:6320106-6320377@chr1:6320107-6320293@chr1:6320122-6320353@chr1:6320126-6320311@chr1:6320128-6320296@chr1:6320133-6320302@chr1:6320133-6320372@chr1:6320134-6320369@chr1:6320137-6320334@chr1:6320144-6320284@chr1:6320151-6320369@chr1:6320153-6320323@chr1:6320153-6320348@chr1:6320160-6320312@…	Cardiovascular@Cardiovascular@Cardiovascular@Cardiovascular@Cardiovascular@Cardiovascular@Cardiovascular@Cardiovascular@Cardiovascular@Cardiovascular@Cardiovascular@Cardiovascular@Cardiovascular@Cardiovascular@Cardiovascular@Cardiovascular@Cardiovascular@Cardiovascular@Cardiovascular@Cardiovascular	SRX7054614@SRX2207673@SRX7054671@SRX7054661@SRX7054666@SRX7055007@SRX7054611@SRX2355085@SRX7054617@SRX7054664@SRX2207672@SRX7055004@SRX7054615@SRX7054616@SRX7054609@SRX7054622@SRX7054670@SRX7054663@SRX7054667@SRX7055008
TRUE	chr6	26086858	26088858	HFE	20	chr6:26086780-26087002@chr6:26087611-26088176@chr6:26087652-26087827@chr6:26087684-26087917@chr6:26087686-26087806@chr6:26087746-26088299@chr6:26087827-26088243@chr6:26087859-26088219@chr6:26087874-26088210@chr6:26087917-26088249@chr6:26087960-26088130@chr6:26087970-26088217@chr6:26087984-26088263@chr6:26088007-26088301@chr6:26088039-26088337@chr6:26088061-26088312@chr6:26088070-26088279@chr6:260…	Blood@Cardiovascular@Cardiovascular@Kidney@Cardiovascular@Cardiovascular@Cardiovascular@Digestive%20tract@Cardiovascular@Cardiovascular@Cardiovascular@Cardiovascular@Cardiovascular@Cardiovascular@Cardiovascular@Cardiovascular@Cardiovascular@Cardiovascular@Cardiovascular@Kidney	SRX2837382@SRX7054671@SRX7054670@SRX2055843@SRX2355078@SRX7054661@SRX7055007@SRX359916@SRX7054666@SRX7054664@SRX7054615@SRX7054617@SRX7054670@SRX7054614@SRX2207672@SRX2207673@SRX7054611@SRX7054616@SRX7055008@SRX2055843
FALSE	chr3	53876874	53877124	CHDH	19	chr3:53876914-53877332@chr3:53876939-53877334@chr3:53876944-53877241@chr3:53876946-53877306@chr3:53876974-53877149@chr3:53877008-53877279@chr3:53877027-53877265@chr3:53877033-53877282@chr3:53877048-53877258@chr3:53877048-53877351@chr3:53877049-53877259@chr3:53877059-53877411@chr3:53877062-53877307@chr3:53877067-53877268@chr3:53877072-53877241@chr3:53877083-53877211@chr3:53877088-53877243@chr3:538…	Cardiovascular@Cardiovascular@Liver@Others@Liver@Digestive%20tract@Lung@Breast@Breast@Blood@Blood@Blood@Blood@Blood@Blood@Blood@Blood@Prostate@Prostate	SRX2207672@SRX2207673@SRX2270129@SRX5938177@SRX2270128@SRX3102571@SRX212183@SRX968977@SRX747790@SRX2837382@SRX150353@SRX150605@SRX017912@SRX150557@SRX017906@SRX150610@SRX017871@SRX1885200@SRX1885199
FALSE	chr8	37739464	37739714	BRF2	19	chr8:37739400-37739692@chr8:37739451-37739640@chr8:37739453-37739690@chr8:37739470-37739741@chr8:37739481-37739650@chr8:37739482-37739708@chr8:37739487-37739673@chr8:37739490-37739666@chr8:37739491-37739659@chr8:37739491-37739682@chr8:37739492-37739716@chr8:37739494-37739624@chr8:37739496-37739680@chr8:37739509-37739657@chr8:37739514-37739656@chr8:37739515-37739675@chr8:37739517-37739633@chr8:377…	Blood@Blood@Blood@Blood@Blood@Blood@Blood@Blood@Blood@Blood@Blood@Blood@Blood@Blood@Blood@Blood@Blood@Blood@Blood	SRX4001967@SRX150362@SRX150557@SRX150605@SRX017906@SRX017912@SRX150610@SRX2837382@SRX150359@SRX017913@SRX150353@SRX150608@SRX150365@SRX017884@SRX150606@SRX017871@SRX4401062@SRX017895@SRX017859
FALSE	chr14	104027751	104029751	BAG5	19	chr14:104028262-104028463@chr14:104028269-104028464@chr14:104028277-104028446@chr14:104028332-104028988@chr14:104028430-104028625@chr14:104028619-104028985@chr14:104028629-104028787@chr14:104028640-104028819@chr14:104028740-104028948@chr14:104028974-104029389@chr14:104029151-104029326@chr14:104029167-104029369@chr14:104029176-104029348@chr14:104029212-104029367@chr14:104029244-104029625@chr14:104…	Cardiovascular@Cardiovascular@Cardiovascular@Cardiovascular@Cardiovascular@Cardiovascular@Cardiovascular@Cardiovascular@Cardiovascular@Blood@Cardiovascular@Cardiovascular@Cardiovascular@Cardiovascular@Digestive%20tract@Uterus@Cardiovascular@Cardiovascular@Cardiovascular	SRX2207673@SRX2207672@SRX7055007@SRX7054661@SRX7054611@SRX7054614@SRX2355085@SRX2207672@SRX7054671@SRX1460848@SRX2355078@SRX2207673@SRX2355085@SRX2207672@SRX359916@SRX378804@SRX7054614@SRX7054671@SRX7054621
TRUE	chr14	73359574	73361574	DPF3	19	chr14:73359351-73359786@chr14:73359382-73359773@chr14:73359383-73359776@chr14:73359418-73359807@chr14:73359568-73359790@chr14:73360762-73361008@chr14:73360771-73360959@chr14:73360777-73361059@chr14:73360797-73360972@chr14:73360799-73360994@chr14:73360818-73360990@chr14:73360823-73360930@chr14:73360826-73361013@chr14:73360829-73361017@chr14:73360840-73361059@chr14:73360865-73361030@chr14:73360872-…	Cardiovascular@Cardiovascular@Cardiovascular@Cardiovascular@Cardiovascular@Cardiovascular@Cardiovascular@Others@Cardiovascular@Cardiovascular@Cardiovascular@Blood@Cardiovascular@Cardiovascular@Cardiovascular@Cardiovascular@Uterus@Cardiovascular@Adipocyte	SRX2207673@SRX2207672@SRX7054614@SRX7054617@SRX7055007@SRX7054611@SRX2355078@SRX5938177@SRX7054662@SRX7054661@SRX7054666@SRX1460848@SRX2355085@SRX7054664@SRX2207672@SRX7054670@SRX378804@SRX4947721@SRX813774
FALSE	chr16	25118371	25118621	LCMT1-AS2	18	chr16:25118071-25118658@chr16:25118071-25118658@chr16:25118342-25118559@chr16:25118342-25118559@chr16:25118364-25118540@chr16:25118364-25118540@chr16:25118372-25118591@chr16:25118372-25118591@chr16:25118373-25118575@chr16:25118373-25118575@chr16:25118382-25118578@chr16:25118382-25118578@chr16:25118413-25118562@chr16:25118413-25118562@chr16:25118443-25118588@chr16:25118443-25118588@chr16:25118445-…	Digestive%20tract@Digestive%20tract@Cardiovascular@Cardiovascular@Cardiovascular@Cardiovascular@Cardiovascular@Cardiovascular@Cardiovascular@Cardiovascular@Cardiovascular@Cardiovascular@Cardiovascular@Cardiovascular@Cardiovascular@Cardiovascular@Blood@Blood	SRX359916@SRX359916@SRX7055007@SRX7055007@SRX7054664@SRX7054664@SRX2207672@SRX2207672@SRX7054617@SRX7054617@SRX2207673@SRX2207673@SRX4947721@SRX4947721@SRX2355085@SRX2355085@SRX1460848@SRX1460848
FALSE	chr1	161053160	161053410	NECTIN4	18	chr1:161052829-161053620@chr1:161053204-161053500@chr1:161053305-161053635@chr1:161053323-161053585@chr1:161053332-161053497@chr1:161053337-161053625@chr1:161053342-161053524@chr1:161053343-161053630@chr1:161053346-161053617@chr1:161053347-161053635@chr1:161053349-161053607@chr1:161053354-161053628@chr1:161053360-161053543@chr1:161053367-161053622@chr1:161053377-161053624@chr1:161053379-161053571…	Others@Cardiovascular@Others@Cardiovascular@Cardiovascular@Others@Cardiovascular@Others@Others@Others@Others@Others@Cardiovascular@Others@Others@Blood@Others@Breast	SRX5938177@SRX2207673@SRX2404132@SRX7054671@SRX7054618@SRX2404134@SRX7054664@SRX2404140@SRX2404141@SRX2404136@SRX2404133@SRX2404135@SRX7054611@SRX2404137@SRX2404142@SRX4001967@SRX2404124@SRX968976
FALSE	chr16	25118371	25118621	ARHGAP17	18	chr16:25118071-25118658@chr16:25118071-25118658@chr16:25118342-25118559@chr16:25118342-25118559@chr16:25118364-25118540@chr16:25118364-25118540@chr16:25118372-25118591@chr16:25118372-25118591@chr16:25118373-25118575@chr16:25118373-25118575@chr16:25118382-25118578@chr16:25118382-25118578@chr16:25118413-25118562@chr16:25118413-25118562@chr16:25118443-25118588@chr16:25118443-25118588@chr16:25118445-…	Digestive%20tract@Digestive%20tract@Cardiovascular@Cardiovascular@Cardiovascular@Cardiovascular@Cardiovascular@Cardiovascular@Cardiovascular@Cardiovascular@Cardiovascular@Cardiovascular@Cardiovascular@Cardiovascular@Cardiovascular@Cardiovascular@Blood@Blood	SRX359916@SRX359916@SRX7055007@SRX7055007@SRX7054664@SRX7054664@SRX2207672@SRX2207672@SRX7054617@SRX7054617@SRX2207673@SRX2207673@SRX4947721@SRX4947721@SRX2355085@SRX2355085@SRX1460848@SRX1460848
FALSE	chr6	80381367	80381617	SH3BGRL2	18	chr6:80381253-80381791@chr6:80381289-80381828@chr6:80381343-80381656@chr6:80381425-80381651@chr6:80381426-80381710@chr6:80381431-80381662@chr6:80381437-80381594@chr6:80381438-80381666@chr6:80381441-80381611@chr6:80381444-80381647@chr6:80381450-80381701@chr6:80381453-80381675@chr6:80381458-80381670@chr6:80381470-80381710@chr6:80381487-80381657@chr6:80381501-80381682@chr6:80381508-80381644@chr6:803…	Cardiovascular@Cardiovascular@Cardiovascular@Others@Cardiovascular@Cardiovascular@Cardiovascular@Cardiovascular@Cardiovascular@Cardiovascular@Cardiovascular@Cardiovascular@Cardiovascular@Cardiovascular@Cardiovascular@Cardiovascular@Cardiovascular@Cardiovascular	SRX2207672@SRX2207673@SRX2207671@SRX2404140@SRX7054617@SRX7054670@SRX7054671@SRX7054611@SRX7054616@SRX7054666@SRX7054661@SRX7055007@SRX7054619@SRX7054657@SRX7054615@SRX7054614@SRX7054609@SRX7054659
TRUE	chr10	111969712	111971712	MXI1	18	chr10:111970617-111971211@chr10:111970713-111971274@chr10:111970779-111971055@chr10:111970810-111971014@chr10:111970884-111971205@chr10:111970887-111971072@chr10:111970895-111971191@chr10:111970900-111971197@chr10:111970902-111971100@chr10:111970916-111971108@chr10:111970921-111971147@chr10:111970932-111971146@chr10:111970935-111971161@chr10:111970945-111971130@chr10:111970950-111971088@chr10:111…	Cardiovascular@Digestive%20tract@Cardiovascular@Cardiovascular@Cardiovascular@Blood@Cardiovascular@Cardiovascular@Cardiovascular@Cardiovascular@Cardiovascular@Cardiovascular@Cardiovascular@Cardiovascular@Cardiovascular@Cardiovascular@Blood@Cardiovascular	SRX2207672@SRX359916@SRX7054616@SRX7054663@SRX7054661@SRX4401064@SRX2207673@SRX7054614@SRX2355085@SRX7054617@SRX7054671@SRX7054666@SRX7054611@SRX7054621@SRX7054609@SRX7054670@SRX1460848@SRX2207672
TRUE	chr2	241373464	241375464	GPC1	18	chr2:241373384-241373838@chr2:241373424-241373661@chr2:241373430-241373755@chr2:241373438-241373698@chr2:241373446-241373760@chr2:241373447-241373737@chr2:241373450-241373771@chr2:241373463-241373723@chr2:241373473-241373794@chr2:241373494-241373707@chr2:241373498-241373742@chr2:241373508-241373710@chr2:241373528-241373760@chr2:241373539-241373717@chr2:241373747-241373839@chr2:241374546-241375114…	Others@Lung@Others@Lung@Others@Others@Others@Others@Others@Others@Adipocyte@Cardiovascular@Cardiovascular@Lung@Bone@Kidney@Kidney@Cardiovascular	SRX5938177@SRX1672130@SRX2404136@SRX1672133@SRX2404140@SRX2404132@SRX2404134@SRX2404137@SRX2404135@SRX2404133@SRX813773@SRX2207672@SRX2207673@SRX212183@SRX3638911@SRX3346352@SRX2055843@SRX2355085
FALSE	chr17	76930285	76930535	CANT1	17	chr17:76929986-76930560@chr17:76929998-76930678@chr17:76930002-76930567@chr17:76930005-76930529@chr17:76930023-76930539@chr17:76930042-76930549@chr17:76930083-76930293@chr17:76930092-76930555@chr17:76930094-76930318@chr17:76930104-76930307@chr17:76930108-76930420@chr17:76930108-76930433@chr17:76930150-76930420@chr17:76930166-76930319@chr17:76930167-76930319@chr17:76930185-76930573@chr17:76930331-…	Cardiovascular@Cardiovascular@Cardiovascular@Cardiovascular@Cardiovascular@Cardiovascular@Cardiovascular@Cardiovascular@Cardiovascular@Cardiovascular@Cardiovascular@Adipocyte@Cardiovascular@Cardiovascular@Cardiovascular@Cardiovascular@Cardiovascular	SRX7054666@SRX2207672@SRX2207673@SRX7054617@SRX7054661@SRX7055007@SRX7054616@SRX7054614@SRX7054615@SRX7054663@SRX7054619@SRX813773@SRX7054611@SRX4947720@SRX112016@SRX7054670@SRX2355079
FALSE	chr11	57559694	57559944	TMX2	17	chr11:57559690-57560005@chr11:57559694-57559969@chr11:57559694-57559972@chr11:57559703-57559910@chr11:57559714-57559946@chr11:57559718-57559900@chr11:57559721-57559917@chr11:57559721-57559945@chr11:57559741-57559943@chr11:57559742-57559987@chr11:57559743-57560018@chr11:57559744-57559981@chr11:57559745-57559938@chr11:57559751-57559887@chr11:57559772-57559932@chr11:57559830-57559955@chr11:57559913-…	Blood@Blood@Blood@Blood@Blood@Blood@Blood@Blood@Blood@Blood@Blood@Blood@Blood@Blood@Blood@Blood@Kidney	SRX150605@SRX150362@SRX150557@SRX150606@SRX017913@SRX017906@SRX150608@SRX150353@SRX017912@SRX150359@SRX017911@SRX017865@SRX017871@SRX150365@SRX150610@SRX017859@SRX2055843
TRUE	chr11	61722553	61722803	BEST1	17	chr11:61722475-61722742@chr11:61722504-61722738@chr11:61722505-61722798@chr11:61722509-61722728@chr11:61722511-61722790@chr11:61722522-61722724@chr11:61722529-61722753@chr11:61722538-61722774@chr11:61722540-61722763@chr11:61722543-61722833@chr11:61722549-61722703@chr11:61722549-61722777@chr11:61722554-61722785@chr11:61722565-61722707@chr11:61722567-61722787@chr11:61722590-61722715@chr11:61722625-…	Cardiovascular@Adipocyte@Cardiovascular@Adipocyte@Cardiovascular@Cardiovascular@Cardiovascular@Cardiovascular@Cardiovascular@Cardiovascular@Lung@Cardiovascular@Cardiovascular@Cardiovascular@Others@Cardiovascular@Cardiovascular	SRX7054622@SRX813773@SRX7054666@SRX813772@SRX7054614@SRX7054619@SRX7054616@SRX7055006@SRX7055007@SRX7054670@SRX212183@SRX7054671@SRX7054661@SRX7054659@SRX2404135@SRX2355081@SRX2355085
FALSE	chr3	142569198	142569448	PCOLCE2	17	chr3:142569145-142569419@chr3:142569153-142569419@chr3:142569162-142569451@chr3:142569168-142569406@chr3:142569178-142569429@chr3:142569185-142569447@chr3:142569190-142569365@chr3:142569198-142569378@chr3:142569199-142569384@chr3:142569203-142569411@chr3:142569208-142569423@chr3:142569226-142569400@chr3:142569228-142569458@chr3:142569229-142569435@chr3:142569242-142569400@chr3:142569314-142569602…	Others@Cardiovascular@Cardiovascular@Cardiovascular@Cardiovascular@Cardiovascular@Cardiovascular@Cardiovascular@Cardiovascular@Cardiovascular@Cardiovascular@Cardiovascular@Cardiovascular@Cardiovascular@Cardiovascular@Blood@Adipocyte	SRX2404132@SRX7054662@SRX7054657@SRX7054618@SRX7054616@SRX7054617@SRX7054671@SRX7054664@SRX7055005@SRX7054663@SRX7054623@SRX7054609@SRX7054661@SRX2207672@SRX7054624@SRX4001967@SRX813773
TRUE	chr6	2810498	2810748	SERPINB1	17	chr6:2810029-2810945@chr6:2810058-2810782@chr6:2810201-2810677@chr6:2810278-2810797@chr6:2810302-2810765@chr6:2810313-2810833@chr6:2810343-2810778@chr6:2810369-2810781@chr6:2810379-2810764@chr6:2810395-2810778@chr6:2810408-2810786@chr6:2810437-2810773@chr6:2810448-2810750@chr6:2810454-2810745@chr6:2810539-2810649@chr6:2810541-2810801@chr6:2810634-2810743	Others@Breast@Digestive%20tract@Others@Others@Others@Digestive%20tract@Others@Others@Others@Others@Others@Others@Others@Uterus@Adipocyte@Breast	SRX5938177@SRX1100313@SRX359916@SRX2404134@SRX2404137@SRX2404140@SRX3102571@SRX2404132@SRX2404135@SRX5938176@SRX2404141@SRX2404142@SRX2404133@SRX2404139@SRX378805@SRX813774@SRX1100312
FALSE	chr8	125739248	125741248	MTSS1	17	chr8:125739065-125739413@chr8:125739150-125739427@chr8:125739152-125739384@chr8:125739160-125739339@chr8:125739170-125739436@chr8:125739186-125739411@chr8:125739188-125739408@chr8:125739199-125739395@chr8:125739206-125739467@chr8:125739234-125739421@chr8:125739235-125739428@chr8:125739242-125739399@chr8:125739262-125739401@chr8:125740614-125740911@chr8:125740644-125740849@chr8:125740684-125740889…	Cardiovascular@Cardiovascular@Kidney@Cardiovascular@Cardiovascular@Cardiovascular@Cardiovascular@Cardiovascular@Cardiovascular@Cardiovascular@Cardiovascular@Cardiovascular@Cardiovascular@Cardiovascular@Cardiovascular@Cardiovascular@Kidney	SRX7054661@SRX2207673@SRX2055843@SRX7054666@SRX7054614@SRX7054657@SRX2207672@SRX7054667@SRX7054611@SRX7054616@SRX7054671@SRX7054664@SRX7054609@SRX2355085@SRX2355081@SRX2355078@SRX3346352
FALSE	chr17	46583213	46583463	HOXB6	16	chr17:46583204-46583507@chr17:46583204-46583507@chr17:46583215-46583429@chr17:46583215-46583429@chr17:46583232-46583525@chr17:46583232-46583525@chr17:46583232-46583532@chr17:46583232-46583532@chr17:46583254-46583476@chr17:46583254-46583476@chr17:46583267-46583517@chr17:46583267-46583517@chr17:46583267-46583518@chr17:46583267-46583518@chr17:46583285-46583444@chr17:46583285-46583444	Cardiovascular@Cardiovascular@Digestive%20tract@Digestive%20tract@Cardiovascular@Cardiovascular@Cardiovascular@Cardiovascular@Blood@Blood@Cardiovascular@Cardiovascular@Cardiovascular@Cardiovascular@Blood@Blood	SRX7054666@SRX7054666@SRX3102571@SRX3102571@SRX2207672@SRX2207672@SRX2207673@SRX2207673@SRX150605@SRX150605@SRX7055007@SRX7055007@SRX7054661@SRX7054661@SRX017913@SRX017913
FALSE	chr5	148851397	148851647	IL17B	16	chr5:148851205-148851515@chr5:148851205-148851515@chr5:148851235-148851416@chr5:148851235-148851416@chr5:148851244-148851492@chr5:148851244-148851492@chr5:148851245-148851480@chr5:148851245-148851480@chr5:148851249-148851414@chr5:148851249-148851414@chr5:148851256-148851465@chr5:148851256-148851465@chr5:148851277-148851441@chr5:148851277-148851441@chr5:148851278-148851492@chr5:148851278-148851492	Cardiovascular@Cardiovascular@Cardiovascular@Cardiovascular@Cardiovascular@Cardiovascular@Cardiovascular@Cardiovascular@Cardiovascular@Cardiovascular@Cardiovascular@Cardiovascular@Cardiovascular@Cardiovascular@Cardiovascular@Cardiovascular	SRX2207672@SRX2207672@SRX7054616@SRX7054616@SRX7054614@SRX7054614@SRX2207673@SRX2207673@SRX7054670@SRX7054670@SRX7054666@SRX7054666@SRX7054663@SRX7054663@SRX7054618@SRX7054618
FALSE	chr17	46583213	46583463	HOXB5	16	chr17:46583204-46583507@chr17:46583204-46583507@chr17:46583215-46583429@chr17:46583215-46583429@chr17:46583232-46583525@chr17:46583232-46583525@chr17:46583232-46583532@chr17:46583232-46583532@chr17:46583254-46583476@chr17:46583254-46583476@chr17:46583267-46583517@chr17:46583267-46583517@chr17:46583267-46583518@chr17:46583267-46583518@chr17:46583285-46583444@chr17:46583285-46583444	Cardiovascular@Cardiovascular@Digestive%20tract@Digestive%20tract@Cardiovascular@Cardiovascular@Cardiovascular@Cardiovascular@Blood@Blood@Cardiovascular@Cardiovascular@Cardiovascular@Cardiovascular@Blood@Blood	SRX7054666@SRX7054666@SRX3102571@SRX3102571@SRX2207672@SRX2207672@SRX2207673@SRX2207673@SRX150605@SRX150605@SRX7055007@SRX7055007@SRX7054661@SRX7054661@SRX017913@SRX017913
FALSE	chr19	49482196	49482446	FTL	16	chr19:49482134-49482275@chr19:49482144-49482507@chr19:49482150-49482429@chr19:49482158-49482461@chr19:49482161-49482441@chr19:49482165-49482440@chr19:49482180-49482416@chr19:49482185-49482411@chr19:49482216-49482393@chr19:49482217-49482388@chr19:49482217-49482398@chr19:49482230-49482443@chr19:49482234-49482472@chr19:49482255-49482387@chr19:49482264-49482365@chr19:49482285-49482401	Blood@Others@Lung@Blood@Blood@Cardiovascular@Blood@Cardiovascular@Cardiovascular@Blood@Blood@Blood@Cardiovascular@Blood@Blood@Blood	SRX4401064@SRX5938177@SRX212183@SRX150605@SRX017912@SRX2207673@SRX150606@SRX2207672@SRX7054614@SRX017895@SRX150610@SRX017913@SRX7054666@SRX150362@SRX150608@SRX150353
FALSE	chr5	148851397	148851647	CSNK1A1	16	chr5:148851205-148851515@chr5:148851205-148851515@chr5:148851235-148851416@chr5:148851235-148851416@chr5:148851244-148851492@chr5:148851244-148851492@chr5:148851245-148851480@chr5:148851245-148851480@chr5:148851249-148851414@chr5:148851249-148851414@chr5:148851256-148851465@chr5:148851256-148851465@chr5:148851277-148851441@chr5:148851277-148851441@chr5:148851278-148851492@chr5:148851278-148851492	Cardiovascular@Cardiovascular@Cardiovascular@Cardiovascular@Cardiovascular@Cardiovascular@Cardiovascular@Cardiovascular@Cardiovascular@Cardiovascular@Cardiovascular@Cardiovascular@Cardiovascular@Cardiovascular@Cardiovascular@Cardiovascular	SRX2207672@SRX2207672@SRX7054616@SRX7054616@SRX7054614@SRX7054614@SRX2207673@SRX2207673@SRX7054670@SRX7054670@SRX7054666@SRX7054666@SRX7054663@SRX7054663@SRX7054618@SRX7054618
FALSE	chr8	12624195	12624445	LONRF1	16	chr8:12623988-12624355@chr8:12624042-12624393@chr8:12624126-12624395@chr8:12624141-12624434@chr8:12624152-12624382@chr8:12624161-12624475@chr8:12624177-12624430@chr8:12624198-12624436@chr8:12624203-12624350@chr8:12624204-12624388@chr8:12624212-12624379@chr8:12624214-12624362@chr8:12624216-12624387@chr8:12624220-12624395@chr8:12624223-12624393@chr8:12624237-12624439	Adipocyte@Adipocyte@Blood@Blood@Blood@Blood@Blood@Blood@Blood@Blood@Blood@Blood@Blood@Blood@Blood@Blood	SRX813774@SRX813773@SRX2837382@SRX150557@SRX4001967@SRX150605@SRX017912@SRX150353@SRX150362@SRX017871@SRX150365@SRX017884@SRX150606@SRX150610@SRX017908@SRX017913
FALSE	chrX	135213181	135213431	FHL1	16	chrX:135212953-135213305@chrX:135213050-135213264@chrX:135213091-135213494@chrX:135213113-135213530@chrX:135213131-135213384@chrX:135213153-135213482@chrX:135213189-135213545@chrX:135213202-135213467@chrX:135213208-135213531@chrX:135213235-135213513@chrX:135213248-135213540@chrX:135213268-135213584@chrX:135213283-135213475@chrX:135213283-135213563@chrX:135213323-135213536@chrX:135213332-135213517	Kidney@Kidney@Lung@Others@Lung@Lung@Others@Cardiovascular@Digestive%20tract@Others@Others@Others@Cardiovascular@Others@Kidney@Cardiovascular	SRX2055843@SRX3636885@SRX1672130@SRX5938177@SRX1672129@SRX1672133@SRX2404135@SRX7054666@SRX3102571@SRX2404133@SRX2404140@SRX2404134@SRX7054611@SRX2404132@SRX3636885@SRX7054671
FALSE	chr19	7553336	7555336	PEX11G	16	chr19:7553759-7553947@chr19:7553760-7554002@chr19:7553768-7553964@chr19:7553783-7553992@chr19:7553814-7554003@chr19:7553823-7554063@chr19:7553824-7554073@chr19:7553825-7553996@chr19:7553829-7554022@chr19:7553830-7554048@chr19:7553864-7554044@chr19:7553888-7554051@chr19:7553911-7554078@chr19:7553924-7554069@chr19:7553946-7554083@chr19:7554443-7554848	Cardiovascular@Cardiovascular@Cardiovascular@Cardiovascular@Blood@Cardiovascular@Cardiovascular@Cardiovascular@Cardiovascular@Cardiovascular@Cardiovascular@Blood@Uterus@Uterus@Blood@Digestive%20tract	SRX7054668@SRX7054615@SRX7054661@SRX7054622@SRX017911@SRX7054666@SRX4947721@SRX7054671@SRX2207672@SRX7054614@SRX2355085@SRX1460848@SRX378805@SRX378804@SRX150605@SRX359916
TRUE	chr2	159313115	159315115	CCDC148	16	chr2:159312901-159313408@chr2:159312927-159313300@chr2:159312950-159313121@chr2:159312976-159313397@chr2:159312986-159313244@chr2:159312999-159313285@chr2:159313061-159313289@chr2:159313069-159313323@chr2:159313070-159313259@chr2:159313097-159313271@chr2:159313100-159313440@chr2:159313172-159313377@chr2:159313233-159313403@chr2:159313533-159313696@chr2:159314203-159314792@chr2:159314599-159314830	Cardiovascular@Cardiovascular@Breast@Kidney@Blood@Breast@Cardiovascular@Others@Breast@Blood@Cardiovascular@Cardiovascular@Cardiovascular@Bone@Digestive%20tract@Kidney	SRX2207672@SRX2207673@SRX1100313@SRX2055843@SRX150605@SRX968978@SRX7054661@SRX5938177@SRX968976@SRX1460847@SRX2355085@SRX2355083@SRX2355078@SRX3638911@SRX359916@SRX2055843
TRUE	chr1	225879158	225879408	ENAH	15	chr1:225879123-225879508@chr1:225879133-225879507@chr1:225879138-225879517@chr1:225879154-225879533@chr1:225879168-225879517@chr1:225879175-225879490@chr1:225879193-225879428@chr1:225879200-225879441@chr1:225879211-225879486@chr1:225879219-225879510@chr1:225879221-225879476@chr1:225879236-225879504@chr1:225879244-225879493@chr1:225879249-225879484@chr1:225879250-225879485	Others@Others@Others@Others@Others@Others@Others@Others@Uterus@Others@Breast@Kidney@Breast@Breast@Uterus	SRX2404135@SRX2404132@SRX2404134@SRX2404136@SRX2404140@SRX2404139@SRX2404133@SRX2404142@SRX027912@SRX2404141@SRX968978@SRX2055843@SRX968976@SRX968977@SRX027913
TRUE	chr1	12600072	12600322	DHRS3	15	chr1:12599896-12600375@chr1:12599947-12600157@chr1:12599960-12600257@chr1:12599974-12600232@chr1:12599978-12600270@chr1:12599997-12600200@chr1:12600031-12600335@chr1:12600040-12600284@chr1:12600054-12600225@chr1:12600060-12600263@chr1:12600081-12600202@chr1:12600083-12600198@chr1:12600088-12600269@chr1:12600105-12600627@chr1:12600283-12600448	Cardiovascular@Cardiovascular@Cardiovascular@Kidney@Cardiovascular@Cardiovascular@Cardiovascular@Cardiovascular@Cardiovascular@Cardiovascular@Uterus@Uterus@Cardiovascular@Kidney@Cardiovascular	SRX7054661@SRX2355085@SRX7054666@SRX2055843@SRX7054611@SRX7054614@SRX7054671@SRX7055006@SRX7054663@SRX7054621@SRX378805@SRX378804@SRX7055008@SRX3636885@SRX2207672
TRUE	chr5	61529302	61529552	KIF2A	15	chr5:61529278-61529590@chr5:61529295-61529575@chr5:61529306-61529602@chr5:61529316-61529585@chr5:61529325-61529555@chr5:61529329-61529569@chr5:61529334-61529503@chr5:61529335-61529541@chr5:61529335-61529555@chr5:61529338-61529524@chr5:61529341-61529552@chr5:61529360-61529511@chr5:61529384-61529559@chr5:61529408-61529572@chr5:61529412-61529586	Cardiovascular@Cardiovascular@Others@Cardiovascular@Cardiovascular@Cardiovascular@Cardiovascular@Cardiovascular@Cardiovascular@Cardiovascular@Cardiovascular@Cardiovascular@Cardiovascular@Cardiovascular@Cardiovascular	SRX2207673@SRX2207672@SRX5938177@SRX7054661@SRX7055007@SRX7054666@SRX2207671@SRX7054657@SRX7054617@SRX7054615@SRX7054614@SRX7054609@SRX7055006@SRX7054663@SRX7054670
FALSE	chr10	54113719	54113969	DKK1	14	chr10:54113742-54113982@chr10:54113754-54114045@chr10:54113762-54113957@chr10:54113769-54113942@chr10:54113770-54113943@chr10:54113770-54113949@chr10:54113775-54113948@chr10:54113778-54113951@chr10:54113780-54113990@chr10:54113785-54113971@chr10:54113804-54113978@chr10:54113807-54113996@chr10:54113812-54113939@chr10:54113815-54113983	Cardiovascular@Cardiovascular@Cardiovascular@Cardiovascular@Adipocyte@Cardiovascular@Cardiovascular@Lung@Cardiovascular@Cardiovascular@Adipocyte@Cardiovascular@Adipocyte@Cardiovascular	SRX7055007@SRX7054666@SRX7054621@SRX7054663@SRX813773@SRX7054671@SRX7054616@SRX212183@SRX7054611@SRX7054661@SRX813772@SRX7054614@SRX813774@SRX7055008
FALSE	chr11	27444749	27444999	CCDC34	14	chr11:27444657-27444963@chr11:27444727-27444994@chr11:27444740-27445006@chr11:27444745-27444988@chr11:27444756-27445032@chr11:27444768-27444996@chr11:27444770-27444989@chr11:27444780-27444940@chr11:27444789-27445002@chr11:27444794-27444995@chr11:27444799-27444990@chr11:27444827-27444971@chr11:27444828-27444992@chr11:27444829-27445039	Adipocyte@Adipocyte@Adipocyte@Cardiovascular@Cardiovascular@Cardiovascular@Cardiovascular@Cardiovascular@Cardiovascular@Uterus@Uterus@Uterus@Lung@Cardiovascular	SRX813774@SRX813772@SRX813773@SRX7054666@SRX7055007@SRX7054671@SRX7054661@SRX7054621@SRX7054615@SRX027913@SRX027912@SRX378805@SRX212183@SRX7054659
FALSE	chr14	89892451	89892701	FOXN3-AS1	14	chr14:89892298-89892562@chr14:89892301-89892660@chr14:89892305-89892668@chr14:89892313-89892543@chr14:89892345-89892580@chr14:89892352-89892632@chr14:89892353-89892604@chr14:89892366-89892539@chr14:89892367-89892603@chr14:89892382-89892526@chr14:89892391-89892573@chr14:89892396-89892543@chr14:89892412-89892616@chr14:89892425-89892535	Lung@Lung@Lung@Others@Others@Others@Lung@Blood@Others@Blood@Digestive%20tract@Blood@Kidney@Blood	SRX212183@SRX1672130@SRX1672129@SRX2404140@SRX2404132@SRX5938177@SRX1672133@SRX150605@SRX2404135@SRX017912@SRX3102571@SRX150557@SRX3636885@SRX150359
FALSE	chr14	94858965	94859215	SERPINA1	14	chr14:94858825-94859264@chr14:94858875-94859154@chr14:94858886-94859157@chr14:94858891-94859163@chr14:94858915-94859135@chr14:94858919-94859228@chr14:94858922-94859084@chr14:94858929-94859066@chr14:94858929-94859078@chr14:94858932-94859078@chr14:94858934-94859085@chr14:94858938-94859049@chr14:94858948-94859133@chr14:94858950-94859113	Others@Blood@Blood@Lung@Lung@Lung@Blood@Adipocyte@Blood@Blood@Blood@Blood@Kidney@Lung	SRX5938177@SRX150605@SRX017912@SRX1672133@SRX1672129@SRX1672130@SRX150353@SRX813774@SRX017871@SRX150362@SRX1460847@SRX150610@SRX2055843@SRX212183
FALSE	chr16	57095309	57095559	CPNE2	14	chr16:57095195-57095491@chr16:57095219-57095388@chr16:57095256-57095535@chr16:57095260-57095503@chr16:57095283-57095482@chr16:57095291-57095513@chr16:57095291-57095546@chr16:57095293-57095470@chr16:57095294-57095469@chr16:57095297-57095462@chr16:57095302-57095477@chr16:57095305-57095498@chr16:57095325-57095445@chr16:57095351-57095483	Cardiovascular@Cardiovascular@Cardiovascular@Cardiovascular@Cardiovascular@Cardiovascular@Adipocyte@Adipocyte@Cardiovascular@Cardiovascular@Cardiovascular@Cardiovascular@Cardiovascular@Cardiovascular	SRX7054661@SRX7054657@SRX7054615@SRX7054666@SRX7054670@SRX7054617@SRX813773@SRX813772@SRX7055006@SRX7055008@SRX7055007@SRX7054671@SRX2355078@SRX2355085
FALSE	chr17	54947761	54948011	DGKE	14	chr17:54947460-54948002@chr17:54947465-54947771@chr17:54947472-54947983@chr17:54947477-54947991@chr17:54947485-54947889@chr17:54947498-54947972@chr17:54947501-54947816@chr17:54947512-54947885@chr17:54947520-54947784@chr17:54947529-54947765@chr17:54947539-54947827@chr17:54947562-54947930@chr17:54947570-54947782@chr17:54947799-54948000	Blood@Cardiovascular@Blood@Blood@Blood@Blood@Blood@Blood@Blood@Cardiovascular@Blood@Blood@Blood@Breast	SRX150605@SRX2207673@SRX150362@SRX150557@SRX017912@SRX017913@SRX017865@SRX150606@SRX150353@SRX2207672@SRX017906@SRX017867@SRX017871@SRX968971
FALSE	chr5	172204571	172204821	DUSP1	14	chr5:172204510-172204714@chr5:172204523-172204760@chr5:172204523-172204781@chr5:172204538-172204805@chr5:172204541-172204759@chr5:172204565-172204794@chr5:172204573-172204689@chr5:172204577-172204754@chr5:172204582-172204763@chr5:172204590-172204890@chr5:172204595-172204783@chr5:172204609-172204741@chr5:172204620-172204779@chr5:172204627-172204738	Blood@Cardiovascular@Cardiovascular@Others@Cardiovascular@Cardiovascular@Blood@Cardiovascular@Cardiovascular@Blood@Cardiovascular@Cardiovascular@Blood@Blood	SRX150353@SRX7055007@SRX2207673@SRX5938177@SRX2207672@SRX7054614@SRX150606@SRX7055004@SRX7054619@SRX150557@SRX7054618@SRX2355085@SRX150605@SRX150610
TRUE	chr6	1461556	1461806	FOXF2	14	chr6:1461440-1461754@chr6:1461441-1461841@chr6:1461449-1461835@chr6:1461462-1461778@chr6:1461475-1461819@chr6:1461495-1461669@chr6:1461508-1461723@chr6:1461514-1461740@chr6:1461517-1461721@chr6:1461523-1461698@chr6:1461526-1461797@chr6:1461545-1461728@chr6:1461558-1461748@chr6:1461565-1461726	Others@Blood@Blood@Blood@Blood@Blood@Blood@Others@Blood@Blood@Blood@Blood@Blood@Lung	SRX5938177@SRX150605@SRX017912@SRX017913@SRX150557@SRX2837382@SRX150365@SRX2404140@SRX150606@SRX017905@SRX017906@SRX017908@SRX017884@SRX212183
FALSE	chr7	76052840	76053090	YWHAG	14	chr7:76052512-76053122@chr7:76052618-76053151@chr7:76052670-76053117@chr7:76052676-76053065@chr7:76052681-76053132@chr7:76052683-76053128@chr7:76052711-76053100@chr7:76052717-76053061@chr7:76052722-76053015@chr7:76052723-76053094@chr7:76052769-76052966@chr7:76052769-76053011@chr7:76052796-76052963@chr7:76052814-76053024	Others@Others@Others@Others@Others@Others@Others@Others@Others@Others@Lung@Digestive%20tract@Lung@Kidney	SRX2404140@SRX5938177@SRX2404134@SRX2404142@SRX2404135@SRX2404132@SRX2404137@SRX2404141@SRX2404139@SRX2404133@SRX1672133@SRX3102571@SRX212183@SRX3636885
TRUE	chr18	55710609	55712609	NEDD4L	14	chr18:55710860-55710974@chr18:55710865-55710976@chr18:55711223-55711522@chr18:55711272-55711718@chr18:55711290-55711493@chr18:55711322-55711456@chr18:55711838-55712099@chr18:55711844-55712128@chr18:55711846-55712101@chr18:55711847-55712089@chr18:55711854-55712048@chr18:55711885-55712051@chr18:55711907-55712040@chr18:55711911-55712019	Blood@Blood@Cardiovascular@Kidney@Cardiovascular@Cardiovascular@Blood@Blood@Blood@Cardiovascular@Cardiovascular@Blood@Blood@Blood	SRX150610@SRX017895@SRX2207672@SRX3346352@SRX2207673@SRX2355085@SRX150605@SRX017911@SRX2837382@SRX2207672@SRX2207673@SRX017912@SRX1460847@SRX150359
TRUE	chr4	145566697	145568697	HHIP	14	chr4:145566873-145567312@chr4:145566883-145567304@chr4:145566948-145567269@chr4:145566956-145567369@chr4:145567033-145567267@chr4:145567048-145567323@chr4:145567109-145567300@chr4:145567120-145567278@chr4:145567141-145567381@chr4:145567145-145567338@chr4:145567147-145567346@chr4:145567151-145567356@chr4:145567158-145567381@chr4:145567186-145567424	Cardiovascular@Cardiovascular@Cardiovascular@Cardiovascular@Cardiovascular@Cardiovascular@Cardiovascular@Cardiovascular@Cardiovascular@Cardiovascular@Cardiovascular@Cardiovascular@Cardiovascular@Cardiovascular	SRX2355085@SRX2207672@SRX2355083@SRX2355079@SRX7054609@SRX2355078@SRX7054667@SRX2355081@SRX7054621@SRX7054664@SRX7054670@SRX7054671@SRX7054614@SRX7054611
FALSE	chr11	47026332	47026582	LRP4	13	chr11:47026267-47026527@chr11:47026287-47026500@chr11:47026302-47026510@chr11:47026303-47026530@chr11:47026304-47026545@chr11:47026307-47026514@chr11:47026311-47026507@chr11:47026318-47026546@chr11:47026318-47026613@chr11:47026330-47026512@chr11:47026338-47026575@chr11:47026356-47026519@chr11:47026359-47026510	Cardiovascular@Cardiovascular@Cardiovascular@Cardiovascular@Cardiovascular@Cardiovascular@Cardiovascular@Adipocyte@Lung@Cardiovascular@Cardiovascular@Cardiovascular@Cardiovascular	SRX7054617@SRX7054670@SRX7054671@SRX7054666@SRX7055007@SRX2207672@SRX7054661@SRX813773@SRX212183@SRX7054618@SRX7054614@SRX2355085@SRX7055008
TRUE	chr12	45342514	45342764	NELL2	13	chr12:45342479-45342779@chr12:45342507-45342718@chr12:45342549-45342797@chr12:45342562-45342687@chr12:45342567-45342794@chr12:45342571-45342711@chr12:45342577-45342730@chr12:45342590-45342775@chr12:45342590-45342804@chr12:45342618-45342772@chr12:45342619-45342771@chr12:45342624-45342754@chr12:45342643-45342743	Others@Cardiovascular@Blood@Prostate@Liver@Cardiovascular@Liver@Cardiovascular@Kidney@Blood@Blood@Blood@Blood	SRX5938177@SRX2355085@SRX150605@SRX1885171@SRX2270129@SRX2355078@SRX2270128@SRX7055004@SRX2055843@SRX150610@SRX150359@SRX150353@SRX150608
FALSE	chr16	4524534	4524784	HMOX2	13	chr16:4524295-4524646@chr16:4524528-4524778@chr16:4524529-4524750@chr16:4524542-4524729@chr16:4524592-4524837@chr16:4524604-4524723@chr16:4524611-4524782@chr16:4524611-4524805@chr16:4524634-4524851@chr16:4524678-4524818@chr16:4524688-4524834@chr16:4524690-4524867@chr16:4524697-4524825	Digestive%20tract@Cardiovascular@Cardiovascular@Cardiovascular@Blood@Blood@Cardiovascular@Cardiovascular@Blood@Blood@Blood@Blood@Blood	SRX359916@SRX2355078@SRX2355085@SRX7054666@SRX150605@SRX1460848@SRX2207672@SRX7054661@SRX150362@SRX017912@SRX017906@SRX150557@SRX150606
FALSE	chr9	124040865	124041115	RAB14	13	chr9:124040776-124041045@chr9:124040805-124041011@chr9:124040808-124041079@chr9:124040808-124041088@chr9:124040824-124041055@chr9:124040827-124041062@chr9:124040828-124040998@chr9:124040830-124041051@chr9:124040833-124041075@chr9:124040838-124041036@chr9:124040842-124041016@chr9:124040848-124041046@chr9:124040874-124041055	Cardiovascular@Cardiovascular@Cardiovascular@Cardiovascular@Cardiovascular@Cardiovascular@Cardiovascular@Cardiovascular@Cardiovascular@Cardiovascular@Cardiovascular@Lung@Cardiovascular	SRX7055007@SRX7055006@SRX2207672@SRX2207673@SRX7054615@SRX7054661@SRX7054668@SRX7054618@SRX7054671@SRX7054609@SRX7054664@SRX212183@SRX7054666
FALSE	chr16	29909935	29911935	SEZ6L2	13	chr16:29910883-29911104@chr16:29910886-29911018@chr16:29911344-29911570@chr16:29911386-29911549@chr16:29911391-29911510@chr16:29911437-29911609@chr16:29911445-29911609@chr16:29911452-29911957@chr16:29911488-29911639@chr16:29911675-29911924@chr16:29911727-29911929@chr16:29911778-29912000@chr16:29911786-29912085	Cardiovascular@Cardiovascular@Cardiovascular@Cardiovascular@Blood@Cardiovascular@Cardiovascular@Kidney@Cardiovascular@Cardiovascular@Cardiovascular@Cardiovascular@Cardiovascular	SRX2207673@SRX2355085@SRX2207672@SRX2355085@SRX1460848@SRX7054666@SRX7054663@SRX3346352@SRX7055008@SRX7054661@SRX7054657@SRX2207673@SRX2207672
FALSE	chr10	22913352	22913602	PIP4K2A	12	chr10:22913353-22913594@chr10:22913362-22913647@chr10:22913375-22913651@chr10:22913380-22913655@chr10:22913384-22913587@chr10:22913387-22913575@chr10:22913403-22913631@chr10:22913410-22913645@chr10:22913413-22913672@chr10:22913417-22913627@chr10:22913436-22913602@chr10:22913453-22913620	Cardiovascular@Cardiovascular@Cardiovascular@Cardiovascular@Cardiovascular@Cardiovascular@Cardiovascular@Cardiovascular@Cardiovascular@Others@Cardiovascular@Cardiovascular	SRX7054666@SRX7055007@SRX2207672@SRX2207673@SRX7054663@SRX7054619@SRX7054661@SRX7054614@SRX7054657@SRX5938177@SRX7054671@SRX7054664
FALSE	chr1	47817124	47817374	CMPK1	12	chr1:47817057-47817317@chr1:47817064-47817311@chr1:47817074-47817331@chr1:47817077-47817285@chr1:47817078-47817333@chr1:47817105-47817242@chr1:47817116-47817254@chr1:47817124-47817279@chr1:47817128-47817250@chr1:47817132-47817285@chr1:47817143-47817285@chr1:47817166-47817270	Blood@Blood@Blood@Blood@Blood@Blood@Blood@Blood@Blood@Blood@Blood@Blood	SRX150605@SRX017912@SRX150557@SRX2837382@SRX017906@SRX017865@SRX150365@SRX150359@SRX150362@SRX150606@SRX150353@SRX1460847
FALSE	chr7	21619844	21620094	DNAH11	12	chr7:21619597-21620057@chr7:21619599-21620028@chr7:21619619-21620059@chr7:21619633-21620002@chr7:21619638-21620117@chr7:21619644-21619934@chr7:21619664-21619968@chr7:21619670-21620099@chr7:21619684-21620048@chr7:21619686-21620077@chr7:21619860-21620086@chr7:21619867-21620095	Others@Others@Others@Others@Others@Blood@Breast@Others@Others@Others@Cardiovascular@Cardiovascular	SRX2404134@SRX2404132@SRX2404141@SRX2404133@SRX5938177@SRX150557@SRX1100313@SRX2404135@SRX2404142@SRX2404140@SRX2207673@SRX2207672
TRUE	chr17	66200519	66202519	AMZ2	12	chr17:66201482-66201743@chr17:66201514-66201752@chr17:66201518-66201769@chr17:66201527-66201729@chr17:66201528-66201665@chr17:66201529-66201659@chr17:66201550-66201762@chr17:66201551-66201745@chr17:66201555-66201762@chr17:66201569-66201756@chr17:66201618-66201787@chr17:66202354-66202459	Cardiovascular@Blood@Kidney@Blood@Blood@Blood@Liver@Cardiovascular@Kidney@Cardiovascular@Cardiovascular@Blood	SRX7054614@SRX150605@SRX2055843@SRX1460848@SRX017912@SRX150608@SRX2270129@SRX2207672@SRX3636885@SRX7054619@SRX7054657@SRX4401061
FALSE	chr15	76660484	76660734	ETFA	11	chr15:76660291-76660864@chr15:76660297-76660846@chr15:76660312-76660590@chr15:76660327-76660693@chr15:76660328-76660825@chr15:76660366-76660752@chr15:76660388-76660599@chr15:76660394-76660641@chr15:76660402-76660604@chr15:76660404-76660749@chr15:76660434-76660603	Cardiovascular@Cardiovascular@Lung@Lung@Uterus@Adipocyte@Cardiovascular@Lung@Cardiovascular@Uterus@Cardiovascular	SRX2207673@SRX2207672@SRX1672129@SRX1672130@SRX027913@SRX813774@SRX7054619@SRX212183@SRX7055007@SRX027912@SRX7054618
TRUE	chrX	131614718	131614968	MBNL3	11	chrX:131614587-131614922@chrX:131614652-131615206@chrX:131614662-131614942@chrX:131614672-131614945@chrX:131614698-131614931@chrX:131614702-131614918@chrX:131614702-131614932@chrX:131614704-131614932@chrX:131614727-131614940@chrX:131614763-131614915@chrX:131614813-131615238	Cardiovascular@Cardiovascular@Cardiovascular@Cardiovascular@Cardiovascular@Cardiovascular@Cardiovascular@Cardiovascular@Cardiovascular@Cardiovascular@Blood	SRX7054614@SRX2207672@SRX2207673@SRX7055007@SRX7054671@SRX7054615@SRX7054621@SRX7054666@SRX7054619@SRX7054667@SRX150605
FALSE	chr11	18719581	18721581	TMEM86A	11	chr11:18720007-18720190@chr11:18720007-18720203@chr11:18720055-18720309@chr11:18720065-18720463@chr11:18720113-18720303@chr11:18720113-18720356@chr11:18720128-18720381@chr11:18720138-18720331@chr11:18720614-18720978@chr11:18720621-18720941@chr11:18720744-18720928	Cardiovascular@Cardiovascular@Cardiovascular@Cardiovascular@Cardiovascular@Cardiovascular@Cardiovascular@Cardiovascular@Cardiovascular@Cardiovascular@Cardiovascular	SRX7054661@SRX2207672@SRX7054615@SRX7054671@SRX2355078@SRX2355085@SRX7054664@SRX7054614@SRX2207672@SRX2207673@SRX7054667
FALSE	chr6	144607872	144609872	UTRN	11	chr6:144608149-144608339@chr6:144608149-144608390@chr6:144608157-144608409@chr6:144608164-144608342@chr6:144608165-144608403@chr6:144608165-144608462@chr6:144608214-144608334@chr6:144608214-144608512@chr6:144608219-144608406@chr6:144608241-144608473@chr6:144608406-144608520	Cardiovascular@Cardiovascular@Cardiovascular@Cardiovascular@Cardiovascular@Cardiovascular@Cardiovascular@Cardiovascular@Cardiovascular@Cardiovascular@Prostate	SRX7054614@SRX7054671@SRX7054666@SRX7054663@SRX2207673@SRX2207672@SRX2355078@SRX7054661@SRX7055006@SRX2355085@SRX1885170
FALSE	chr14	92339766	92340016	TC2N	10	chr14:92339838-92340076@chr14:92339856-92339977@chr14:92339888-92340026@chr14:92339893-92340040@chr14:92339895-92340022@chr14:92339899-92340051@chr14:92339900-92340026@chr14:92339908-92340092@chr14:92339914-92340035@chr14:92339916-92340025	Blood@Blood@Blood@Blood@Blood@Blood@Blood@Blood@Blood@Blood	SRX150605@SRX150606@SRX150365@SRX150557@SRX150610@SRX017912@SRX150362@SRX150353@SRX150359@SRX017895
FALSE	chr8	142053475	142053725	PTK2	10	chr8:142053414-142053769@chr8:142053427-142053715@chr8:142053451-142053738@chr8:142053470-142053725@chr8:142053487-142053714@chr8:142053489-142053740@chr8:142053499-142053730@chr8:142053511-142053761@chr8:142053543-142053749@chr8:142053590-142053770	Kidney@Others@Lung@Lung@Others@Others@Cardiovascular@Cardiovascular@Cardiovascular@Cardiovascular	SRX3636885@SRX2404132@SRX212183@SRX1672133@SRX2404134@SRX5938177@SRX425264@SRX7054618@SRX7054671@SRX7054614
FALSE	chr1	112902744	112902994	CTTNBP2NL	10	chr1:112902848-112903173@chr1:112902884-112903191@chr1:112902888-112903181@chr1:112902895-112903099@chr1:112902925-112903187@chr1:112902927-112903130@chr1:112902931-112903177@chr1:112902953-112903125@chr1:112902970-112903143@chr1:112902984-112903135	Cardiovascular@Cardiovascular@Cardiovascular@Cardiovascular@Cardiovascular@Cardiovascular@Cardiovascular@Cardiovascular@Kidney@Cardiovascular	SRX2207673@SRX7055007@SRX2207672@SRX7054661@SRX7054666@SRX7054670@SRX7054614@SRX7054616@SRX2055843@SRX7055008
TRUE	chr1	13931789	13932039	PDPN	10	chr1:13931669-13932081@chr1:13931715-13931968@chr1:13931729-13932062@chr1:13931735-13931998@chr1:13931741-13931962@chr1:13931743-13931980@chr1:13931757-13932040@chr1:13931759-13932007@chr1:13931762-13932033@chr1:13931817-13931935	Others@Breast@Breast@Others@Breast@Others@Breast@Digestive%20tract@Kidney@Prostate	SRX5938177@SRX968978@SRX968977@SRX2404136@SRX968976@SRX2404134@SRX1100313@SRX3102571@SRX3636885@SRX1885200
FALSE	chr1	202004028	202004278	LMOD1	10	chr1:202003781-202004123@chr1:202003793-202004272@chr1:202003795-202004154@chr1:202003852-202004220@chr1:202003880-202004211@chr1:202003905-202004137@chr1:202003977-202004244@chr1:202003986-202004276@chr1:202004064-202004232@chr1:202004097-202004222	Kidney@Others@Breast@Others@Others@Kidney@Others@Uterus@Adipocyte@Uterus	SRX2055843@SRX5938177@SRX968976@SRX2404136@SRX2404134@SRX3636885@SRX2404132@SRX4301475@SRX813773@SRX378805
TRUE	chr20	49067606	49067856	PTPN1	10	chr20:49067444-49068051@chr20:49067524-49067779@chr20:49067531-49067783@chr20:49067540-49067784@chr20:49067567-49067759@chr20:49067605-49067799@chr20:49067633-49067777@chr20:49067657-49067777@chr20:49067663-49067797@chr20:49067665-49067778	Lung@Blood@Blood@Blood@Blood@Blood@Blood@Blood@Blood@Blood	SRX1672130@SRX017912@SRX2837382@SRX150605@SRX150610@SRX150353@SRX150557@SRX150359@SRX017871@SRX017859
FALSE	chr9	88721818	88722068	GOLM1	9	chr9:88721841-88722141@chr9:88721863-88722046@chr9:88721863-88722048@chr9:88721868-88722127@chr9:88721878-88722027@chr9:88721882-88722020@chr9:88721883-88722076@chr9:88721887-88722054@chr9:88721897-88722117	Others@Cardiovascular@Cardiovascular@Blood@Blood@Blood@Blood@Blood@Blood	SRX5938177@SRX2207672@SRX2207673@SRX150605@SRX150359@SRX1460847@SRX017912@SRX017913@SRX150362
FALSE	chr9	98189012	98189262	PTCH1	9	chr9:98189023-98189323@chr9:98189024-98189139@chr9:98189038-98189334@chr9:98189056-98189398@chr9:98189108-98189411@chr9:98189129-98189318@chr9:98189153-98189323@chr9:98189164-98189390@chr9:98189249-98189783	Liver@Uterus@Blood@Blood@Kidney@Cardiovascular@Kidney@Others@Digestive%20tract	SRX2270129@SRX378804@SRX017911@SRX150605@SRX3636885@SRX2207672@SRX2055843@SRX2404140@SRX359916
TRUE	chr1	108668058	108668308	SLC25A24	9	chr1:108668148-108668384@chr1:108668160-108668391@chr1:108668184-108668381@chr1:108668240-108668411@chr1:108668250-108668391@chr1:108668252-108668426@chr1:108668257-108668413@chr1:108668273-108668397@chr1:108668285-108668401	Cardiovascular@Cardiovascular@Cardiovascular@Blood@Cardiovascular@Cardiovascular@Blood@Blood@Blood	SRX7054661@SRX2207673@SRX7054614@SRX150605@SRX2355078@SRX2207672@SRX150606@SRX150610@SRX150353
TRUE	chr17	73865334	73865584	WBP2	9	chr17:73865353-73865636@chr17:73865368-73865696@chr17:73865378-73865706@chr17:73865394-73865622@chr17:73865404-73865629@chr17:73865413-73865679@chr17:73865413-73865737@chr17:73865421-73865665@chr17:73865444-73865607	Lung@Cardiovascular@Cardiovascular@Cardiovascular@Cardiovascular@Cardiovascular@Cardiovascular@Others@Cardiovascular	SRX212183@SRX2207673@SRX2207672@SRX7055007@SRX7054666@SRX7054661@SRX7054614@SRX5938177@SRX2355085
TRUE	chrX	3615768	3616018	PRKX	9	chrX:3615784-3616126@chrX:3615787-3615958@chrX:3615790-3615951@chrX:3615791-3616078@chrX:3615834-3616062@chrX:3615843-3616003@chrX:3615845-3616049@chrX:3615868-3616047@chrX:3615876-3616076	Cardiovascular@Cardiovascular@Cardiovascular@Cardiovascular@Cardiovascular@Cardiovascular@Cardiovascular@Cardiovascular@Adipocyte	SRX2207672@SRX7054670@SRX7054671@SRX2207673@SRX7055007@SRX7054621@SRX7054661@SRX7054663@SRX813774
TRUE	chr5	176729962	176731962	PRELID1	9	chr5:176730629-176730923@chr5:176730686-176730848@chr5:176730690-176730815@chr5:176730697-176730824@chr5:176730703-176730899@chr5:176730712-176730908@chr5:176731497-176731716@chr5:176731503-176731651@chr5:176731510-176731730	Kidney@Cardiovascular@Cardiovascular@Cardiovascular@Blood@Liver@Cardiovascular@Blood@Cardiovascular	SRX3346352@SRX2355085@SRX2355081@SRX2355078@SRX1460848@SRX2270129@SRX2207672@SRX2837382@SRX2207673
FALSE	chr11	119186240	119188240	MCAM	9	chr11:119186235-119186436@chr11:119186766-119187015@chr11:119186789-119186993@chr11:119187687-119187802@chr11:119187717-119187987@chr11:119187835-119187960@chr11:119188154-119188406@chr11:119188171-119188358@chr11:119188173-119188382	Cardiovascular@Adipocyte@Adipocyte@Bone@Cardiovascular@Cardiovascular@Adipocyte@Adipocyte@Adipocyte	SRX2207672@SRX813773@SRX813772@SRX3638907@SRX2355085@SRX2355081@SRX813773@SRX813774@SRX813772
TRUE	chr4	119272772	119274772	PRSS12	9	chr4:119273229-119273400@chr4:119273236-119273589@chr4:119273242-119273504@chr4:119273254-119273624@chr4:119273258-119273524@chr4:119273266-119273457@chr4:119274083-119274242@chr4:119274083-119274286@chr4:119274110-119274217	Lung@Cardiovascular@Breast@Cardiovascular@Breast@Breast@Cardiovascular@Cardiovascular@Blood	SRX212183@SRX2207672@SRX968976@SRX2207673@SRX968978@SRX968977@SRX7054664@SRX7054614@SRX1460848
FALSE	chrX	106871153	106873153	PRPS1	9	chrX:106871452-106871581@chrX:106871466-106871719@chrX:106871469-106871753@chrX:106871476-106871662@chrX:106871481-106871684@chrX:106871494-106871729@chrX:106871499-106871713@chrX:106871544-106871748@chrX:106871598-106871809	Blood@Cardiovascular@Cardiovascular@Cardiovascular@Cardiovascular@Cardiovascular@Cardiovascular@Cardiovascular@Cardiovascular	SRX1460848@SRX2207672@SRX2355078@SRX7054657@SRX7054611@SRX2355085@SRX7054671@SRX7054664@SRX7054670
FALSE	chr11	95610545	95610795	MTMR2	8	chr11:95610516-95610858@chr11:95610538-95610824@chr11:95610547-95610815@chr11:95610569-95610756@chr11:95610580-95610766@chr11:95610580-95610782@chr11:95610595-95610765@chr11:95610612-95610808	Lung@Cardiovascular@Cardiovascular@Cardiovascular@Cardiovascular@Cardiovascular@Cardiovascular@Cardiovascular	SRX212183@SRX7054618@SRX2355079@SRX7054657@SRX7054611@SRX7054615@SRX7054616@SRX7054661
TRUE	chr16	85558470	85558720	GSE1	8	chr16:85558398-85558709@chr16:85558512-85558942@chr16:85558513-85558813@chr16:85558535-85558940@chr16:85558554-85559084@chr16:85558564-85559100@chr16:85558605-85558900@chr16:85558618-85558806	Others@Adipocyte@Blood@Adipocyte@Kidney@Others@Kidney@Adipocyte	SRX5938177@SRX813773@SRX4001967@SRX813772@SRX2055843@SRX2404140@SRX3636885@SRX813774
FALSE	chr18	28642116	28642366	DSC2	8	chr18:28641960-28642168@chr18:28641960-28642168@chr18:28641971-28642280@chr18:28641971-28642280@chr18:28642066-28642268@chr18:28642066-28642268@chr18:28642073-28642214@chr18:28642073-28642214	Blood@Blood@Blood@Blood@Blood@Blood@Blood@Blood	SRX017912@SRX017912@SRX150605@SRX150605@SRX017913@SRX017913@SRX150359@SRX150359
TRUE	chr6	36733991	36734241	CPNE5	8	chr6:36734014-36734210@chr6:36734014-36734210@chr6:36734021-36734181@chr6:36734021-36734181@chr6:36734022-36734203@chr6:36734022-36734203@chr6:36734049-36734201@chr6:36734049-36734201	Blood@Blood@Blood@Blood@Blood@Blood@Cardiovascular@Cardiovascular	SRX150610@SRX150610@SRX150605@SRX150605@SRX017895@SRX017895@SRX2355085@SRX2355085
TRUE	chr8	37541861	37542111	ZNF703	8	chr8:37541883-37542272@chr8:37541912-37542268@chr8:37541925-37542154@chr8:37541949-37542157@chr8:37541962-37542167@chr8:37541966-37542129@chr8:37541998-37542149@chr8:37542004-37542150	Breast@Breast@Lung@Breast@Breast@Cardiovascular@Breast@Breast	SRX968977@SRX968971@SRX212183@SRX968978@SRX968976@SRX2207673@SRX747789@SRX747790
FALSE	chr18	28642116	28642366	DSC3	8	chr18:28641960-28642168@chr18:28641960-28642168@chr18:28641971-28642280@chr18:28641971-28642280@chr18:28642066-28642268@chr18:28642066-28642268@chr18:28642073-28642214@chr18:28642073-28642214	Blood@Blood@Blood@Blood@Blood@Blood@Blood@Blood	SRX017912@SRX017912@SRX150605@SRX150605@SRX017913@SRX017913@SRX150359@SRX150359
TRUE	chr19	14672684	14672934	GIPC1	8	chr19:14672676-14673063@chr19:14672694-14673066@chr19:14672698-14672960@chr19:14672705-14672950@chr19:14672738-14672984@chr19:14672741-14672882@chr19:14672741-14672946@chr19:14672751-14672987	Kidney@Kidney@Blood@Blood@Kidney@Blood@Blood@Breast	SRX2055843@SRX3636885@SRX2837382@SRX150605@SRX3346352@SRX017912@SRX017913@SRX1100313
FALSE	chr2	71704550	71704800	DYSF	8	chr2:71704572-71704829@chr2:71704609-71704805@chr2:71704618-71704849@chr2:71704624-71704794@chr2:71704631-71704805@chr2:71704634-71704798@chr2:71704643-71704873@chr2:71704666-71704826	Cardiovascular@Cardiovascular@Adipocyte@Cardiovascular@Adipocyte@Cardiovascular@Adipocyte@Cardiovascular	SRX7055007@SRX7054666@SRX813774@SRX7054671@SRX813772@SRX7054663@SRX813773@SRX7054621
FALSE	chr4	120232050	120232300	C4orf3	8	chr4:120232119-120232504@chr4:120232132-120232363@chr4:120232140-120232504@chr4:120232153-120232400@chr4:120232181-120232365@chr4:120232184-120232356@chr4:120232208-120232444@chr4:120232261-120232430	Cardiovascular@Cardiovascular@Cardiovascular@Cardiovascular@Cardiovascular@Cardiovascular@Cardiovascular@Cardiovascular	SRX2207673@SRX7054670@SRX2207672@SRX7054661@SRX7054664@SRX7054614@SRX7054663@SRX7054657
TRUE	chr6	36733991	36734241	CDKN1A	8	chr6:36734014-36734210@chr6:36734014-36734210@chr6:36734021-36734181@chr6:36734021-36734181@chr6:36734022-36734203@chr6:36734022-36734203@chr6:36734049-36734201@chr6:36734049-36734201	Blood@Blood@Blood@Blood@Blood@Blood@Cardiovascular@Cardiovascular	SRX150610@SRX150610@SRX150605@SRX150605@SRX017895@SRX017895@SRX2355085@SRX2355085
FALSE	chrX	122799132	122799382	THOC2	8	chrX:122799121-122799556@chrX:122799147-122799375@chrX:122799165-122799476@chrX:122799170-122799464@chrX:122799197-122799393@chrX:122799200-122799422@chrX:122799202-122799477@chrX:122799209-122799492	Others@Lung@Others@Others@Uterus@Others@Others@Others	SRX5938177@SRX1672130@SRX2404134@SRX2404140@SRX027913@SRX2404139@SRX2404135@SRX2404132
FALSE	chr9	130692176	130694176	PIP5KL1	8	chr9:130692988-130693238@chr9:130693005-130693230@chr9:130693056-130693241@chr9:130693072-130693234@chr9:130693120-130693258@chr9:130693192-130693362@chr9:130693192-130693411@chr9:130693944-130694099	Cardiovascular@Cardiovascular@Cardiovascular@Cardiovascular@Blood@Cardiovascular@Cardiovascular@Cardiovascular	SRX2207672@SRX7054622@SRX7055007@SRX2355085@SRX1460848@SRX7054616@SRX2207673@SRX2207672
FALSE	chr12	129302237	129302487	GLT1D1	7	chr12:129301970-129302362@chr12:129301989-129302498@chr12:129302005-129302484@chr12:129302042-129302242@chr12:129302049-129302384@chr12:129302081-129302332@chr12:129302205-129302365	Others@Cardiovascular@Cardiovascular@Cardiovascular@Cardiovascular@Cardiovascular@Cardiovascular	SRX5938177@SRX2207672@SRX2207673@SRX7054618@SRX7055007@SRX7054617@SRX7054621
FALSE	chr16	85548624	85548874	GSE1	7	chr16:85548351-85548989@chr16:85548386-85548865@chr16:85548403-85548832@chr16:85548441-85548944@chr16:85548579-85548939@chr16:85548676-85549055@chr16:85548720-85549036	Others@Others@Lung@Kidney@Others@Adipocyte@Adipocyte	SRX5938177@SRX2404140@SRX212183@SRX3636885@SRX2404135@SRX813773@SRX813772
TRUE	chr8	120751294	120751544	ENPP2	7	chr8:120751197-120751572@chr8:120751205-120751479@chr8:120751225-120751517@chr8:120751241-120751602@chr8:120751253-120751453@chr8:120751291-120751460@chr8:120751317-120751509	Kidney@Adipocyte@Adipocyte@Kidney@Adipocyte@Lung@Blood	SRX3636885@SRX813774@SRX813773@SRX2055843@SRX813772@SRX212183@SRX4001967
TRUE	chr1	110366726	110366976	GSTM3	7	chr1:110366737-110366988@chr1:110366756-110367092@chr1:110366767-110367070@chr1:110366778-110367015@chr1:110366802-110366986@chr1:110366808-110366964@chr1:110366818-110367076	Kidney@Kidney@Others@Lung@Kidney@Cardiovascular@Lung	SRX3346352@SRX3636885@SRX5938177@SRX212183@SRX2055843@SRX2207672@SRX1672133
TRUE	chr20	837110	837360	FAM110A	7	chr20:837096-837511@chr20:837127-837344@chr20:837142-837478@chr20:837144-837486@chr20:837147-837413@chr20:837191-837388@chr20:837224-837411	Others@Kidney@Others@Others@Cardiovascular@Lung@Cardiovascular	SRX5938177@SRX2055843@SRX2404140@SRX2404137@SRX2207672@SRX1672133@SRX2207673
FALSE	chr7	139434344	139434594	HIPK2	7	chr7:139434212-139434405@chr7:139434226-139434570@chr7:139434239-139434406@chr7:139434270-139434554@chr7:139434277-139434502@chr7:139434303-139434504@chr7:139434327-139434509	Adipocyte@Cardiovascular@Cardiovascular@Lung@Cardiovascular@Lung@Adipocyte	SRX813774@SRX2207672@SRX294971@SRX1672130@SRX2207673@SRX1672129@SRX813772
FALSE	chr17	48981692	48981942	WFIKKN2	6	chr17:48981680-48981883@chr17:48981680-48981883@chr17:48981719-48981829@chr17:48981719-48981829@chr17:48981919-48982142@chr17:48981919-48982142	Breast@Breast@Blood@Blood@Adipocyte@Adipocyte	SRX968971@SRX968971@SRX150365@SRX150365@SRX813772@SRX813772
FALSE	chr1	184797196	184797446	EDEM3	6	chr1:184797262-184797558@chr1:184797271-184797576@chr1:184797276-184797544@chr1:184797289-184797593@chr1:184797300-184797545@chr1:184797339-184797538	Others@Others@Others@Others@Uterus@Lung	SRX2404132@SRX5938177@SRX2404140@SRX2404135@SRX027912@SRX212183
FALSE	chr1	40265662	40265912	BMP8B	6	chr1:40265686-40265917@chr1:40265686-40265917@chr1:40265688-40265883@chr1:40265688-40265883@chr1:40265688-40265885@chr1:40265688-40265885	Cardiovascular@Cardiovascular@Cardiovascular@Cardiovascular@Cardiovascular@Cardiovascular	SRX2207673@SRX2207673@SRX2355079@SRX2355079@SRX2207672@SRX2207672
TRUE	chr3	44981104	44981354	CLEC3B	6	chr3:44981114-44981329@chr3:44981114-44981329@chr3:44981177-44981359@chr3:44981177-44981359@chr3:44981179-44981385@chr3:44981179-44981385	Cardiovascular@Cardiovascular@Cardiovascular@Cardiovascular@Cardiovascular@Cardiovascular	SRX7054671@SRX7054671@SRX7054661@SRX7054661@SRX7054666@SRX7054666
FALSE	chr5	118696592	118696842	TNFAIP8	6	chr5:118696551-118696839@chr5:118696615-118696852@chr5:118696622-118697167@chr5:118696625-118696868@chr5:118696630-118696843@chr5:118696686-118696913	Others@Others@Others@Lung@Lung@Others	SRX2404135@SRX2404134@SRX5938177@SRX212183@SRX1672130@SRX2404140
TRUE	chr6	89760019	89760269	RNGTT	6	chr6:89759942-89760248@chr6:89759946-89760157@chr6:89759961-89760226@chr6:89759975-89760179@chr6:89759980-89760185@chr6:89760007-89760164	Adipocyte@Lung@Adipocyte@Adipocyte@Cardiovascular@Cardiovascular	SRX813773@SRX212183@SRX813772@SRX813774@SRX7055007@SRX7054671
FALSE	chr16	54980672	54980922	CRNDE	6	chr16:54980656-54981280@chr16:54980702-54980988@chr16:54980726-54981001@chr16:54980743-54980941@chr16:54980763-54980950@chr16:54980766-54980967	Others@Cardiovascular@Adipocyte@Cardiovascular@Cardiovascular@Breast	SRX5938177@SRX7055007@SRX813774@SRX7054666@SRX7054614@SRX1100313
FALSE	chr17	48981692	48981942	TOB1	6	chr17:48981680-48981883@chr17:48981680-48981883@chr17:48981719-48981829@chr17:48981719-48981829@chr17:48981919-48982142@chr17:48981919-48982142	Breast@Breast@Blood@Blood@Adipocyte@Adipocyte	SRX968971@SRX968971@SRX150365@SRX150365@SRX813772@SRX813772
FALSE	chr1	40265662	40265912	OXCT2	6	chr1:40265686-40265917@chr1:40265686-40265917@chr1:40265688-40265883@chr1:40265688-40265883@chr1:40265688-40265885@chr1:40265688-40265885	Cardiovascular@Cardiovascular@Cardiovascular@Cardiovascular@Cardiovascular@Cardiovascular	SRX2207673@SRX2207673@SRX2355079@SRX2355079@SRX2207672@SRX2207672
TRUE	chr22	50338852	50339102	PIM3	6	chr22:50338362-50339220@chr22:50338457-50339145@chr22:50338655-50339167@chr22:50338736-50339151@chr22:50338848-50339123@chr22:50338850-50339102	Digestive%20tract@Blood@Blood@Blood@Blood@Blood	SRX359916@SRX2837382@SRX150606@SRX150557@SRX017891@SRX017906
FALSE	chr2	216896726	216896976	MREG	6	chr2:216896791-216897045@chr2:216896795-216896962@chr2:216896796-216896999@chr2:216896822-216897002@chr2:216896846-216896964@chr2:216896862-216896973	Blood@Blood@Blood@Cardiovascular@Blood@Blood	SRX150557@SRX017905@SRX017906@SRX7054661@SRX150359@SRX150361
TRUE	chr3	44981104	44981354	ZDHHC3	6	chr3:44981114-44981329@chr3:44981114-44981329@chr3:44981177-44981359@chr3:44981177-44981359@chr3:44981179-44981385@chr3:44981179-44981385	Cardiovascular@Cardiovascular@Cardiovascular@Cardiovascular@Cardiovascular@Cardiovascular	SRX7054671@SRX7054671@SRX7054661@SRX7054661@SRX7054666@SRX7054666
FALSE	chr4	87860332	87860582	AFF1	6	chr4:87860345-87860580@chr4:87860355-87860531@chr4:87860356-87860583@chr4:87860371-87860561@chr4:87860377-87860539@chr4:87860390-87860547	Cardiovascular@Cardiovascular@Cardiovascular@Cardiovascular@Cardiovascular@Cardiovascular	SRX2207673@SRX7055008@SRX2207672@SRX7055007@SRX2207671@SRX7054671
TRUE	chrX	10134757	10135007	CLCN4	6	chrX:10134611-10135039@chrX:10134619-10135151@chrX:10134715-10134919@chrX:10134723-10134945@chrX:10134724-10134899@chrX:10134724-10134899	Cardiovascular@Cardiovascular@Cardiovascular@Cardiovascular@Cardiovascular@Cardiovascular	SRX2207673@SRX2207672@SRX2355085@SRX4947721@SRX112016@SRX4947720
TRUE	chr2	10860224	10862224	ATP6V1C2	6	chr2:10860351-10860802@chr2:10860514-10860670@chr2:10860555-10860697@chr2:10861242-10861365@chr2:10861544-10861752@chr2:10861571-10861753	Others@Digestive%20tract@Breast@Blood@Cardiovascular@Cardiovascular	SRX5938177@SRX3102571@SRX968976@SRX4401063@SRX7054614@SRX7054666
FALSE	chr10	43782788	43783038	RASGEF1A	5	chr10:43782818-43783086@chr10:43782831-43782991@chr10:43782851-43782965@chr10:43782867-43783107@chr10:43782876-43783105	Others@Blood@Blood@Cardiovascular@Cardiovascular	SRX5938177@SRX1460848@SRX1460847@SRX2207673@SRX2207672
FALSE	chr11	77880048	77880298	NDUFC2	5	chr11:77880180-77880550@chr11:77880222-77880597@chr11:77880245-77880554@chr11:77880276-77880566@chr11:77880292-77880548	Cardiovascular@Adipocyte@Adipocyte@Cardiovascular@Cardiovascular	SRX2207672@SRX813773@SRX813772@SRX7054618@SRX7054657
FALSE	chr2	238807303	238807553	RAMP1	5	chr2:238807142-238807592@chr2:238807229-238807402@chr2:238807247-238807347@chr2:238807264-238807436@chr2:238807478-238807639	Blood@Blood@Blood@Blood@Blood	SRX150605@SRX150362@SRX150608@SRX150353@SRX1460848
FALSE	chr6	2162086	2162336	DDR1	5	chr6:2161759-2162295@chr6:2161783-2162254@chr6:2161883-2162099@chr6:2161971-2162178@chr6:2162151-2162488	Cardiovascular@Cardiovascular@Cardiovascular@Digestive%20tract@Others	SRX2207673@SRX2207672@SRX2207671@SRX3102571@SRX2404132
TRUE	chr14	94851408	94851658	SERPINA1	5	chr14:94851291-94851547@chr14:94851318-94851532@chr14:94851335-94851503@chr14:94851346-94851518@chr14:94851351-94851586	Blood@Digestive%20tract@Adipocyte@Blood@Kidney	SRX4001967@SRX3102571@SRX813774@SRX150353@SRX2055843
FALSE	chr2	26995290	26995540	SLC35F6	5	chr2:26995304-26995588@chr2:26995314-26995570@chr2:26995353-26995562@chr2:26995376-26995548@chr2:26995465-26995944	Cardiovascular@Cardiovascular@Uterus@Prostate@Breast	SRX2207672@SRX2207673@SRX027912@SRX1885171@SRX968971
FALSE	chr9	120249967	120250217	ASTN2	5	chr9:120249875-120250046@chr9:120249904-120250087@chr9:120249919-120250101@chr9:120249930-120250046@chr9:120249941-120250066	Blood@Liver@Blood@Blood@Blood	SRX4401064@SRX2270129@SRX4401061@SRX4401062@SRX4401063
FALSE	chr9	125010814	125011064	NDUFA8	5	chr9:125010679-125011123@chr9:125010684-125011136@chr9:125010871-125011119@chr9:125010895-125011062@chr9:125010896-125011062	Cardiovascular@Cardiovascular@Cardiovascular@Cardiovascular@Cardiovascular	SRX2207672@SRX2207673@SRX4947721@SRX4947720@SRX112016
FALSE	chr11	119351918	119352168	USP2	4	chr11:119352004-119352205@chr11:119352033-119352208@chr11:119352125-119352331@chr11:119352133-119352343	Adipocyte@Adipocyte@Cardiovascular@Kidney	SRX813773@SRX813772@SRX2355085@SRX3636885
FALSE	chr15	59598910	59599160	MYO1E	4	chr15:59598700-59598921@chr15:59598718-59598975@chr15:59598763-59598945@chr15:59598764-59598915	Cardiovascular@Cardiovascular@Cardiovascular@Cardiovascular	SRX7055007@SRX7054666@SRX7054671@SRX7055008
TRUE	chr17	41081181	41081431	AOC3	4	chr17:41081292-41081459@chr17:41081292-41081459@chr17:41081363-41081493@chr17:41081363-41081493	Cardiovascular@Cardiovascular@Blood@Blood	SRX2355085@SRX2355085@SRX150362@SRX150362
FALSE	chr17	56818574	56818824	TEX14	4	chr17:56818439-56818784@chr17:56818471-56818751@chr17:56818489-56818634@chr17:56818492-56818726	Others@Others@Breast@Lung	SRX5938177@SRX2404140@SRX968976@SRX212183
TRUE	chr1	25296976	25297226	RUNX3	4	chr1:25296918-25297189@chr1:25296939-25297172@chr1:25296970-25297184@chr1:25297022-25297151	Cardiovascular@Cardiovascular@Kidney@Cardiovascular	SRX2207672@SRX2207673@SRX2055843@SRX2355085
FALSE	chr20	61560532	61560782	SLC17A9	4	chr20:61560557-61560763@chr20:61560567-61560761@chr20:61560606-61560778@chr20:61560623-61560822	Cardiovascular@Cardiovascular@Cardiovascular@Cardiovascular	SRX7054671@SRX2355081@SRX7054657@SRX7054664
FALSE	chr2	198478172	198478422	MARS2	4	chr2:198478268-198478520@chr2:198478282-198478634@chr2:198478310-198478607@chr2:198478312-198478594	Breast@Adipocyte@Adipocyte@Adipocyte	SRX968971@SRX813772@SRX813774@SRX813773
FALSE	chr3	52124215	52124465	DUSP7	4	chr3:52124123-52124344@chr3:52124123-52124344@chr3:52124126-52124355@chr3:52124126-52124355	Cardiovascular@Cardiovascular@Cardiovascular@Cardiovascular	SRX2207672@SRX2207672@SRX2207673@SRX2207673
TRUE	chr8	144573258	144573508	MAFA	4	chr8:144573226-144573526@chr8:144573227-144573530@chr8:144573242-144573484@chr8:144573308-144573438	Kidney@Kidney@Uterus@Adipocyte	SRX2055843@SRX3636885@SRX4301469@SRX813774
TRUE	chr6	168256535	168256785	AFDN	4	chr6:168256536-168256784@chr6:168256597-168256887@chr6:168256687-168256855@chr6:168256696-168256857	Lung@Lung@Cardiovascular@Cardiovascular	SRX1672133@SRX212183@SRX2207672@SRX2207673
TRUE	chr11	76518386	76518636	ACER3	4	chr11:76518178-76518614@chr11:76518178-76518646@chr11:76518359-76518613@chr11:76518607-76518763	Adipocyte@Adipocyte@Adipocyte@Cardiovascular	SRX813772@SRX813773@SRX813774@SRX2207672
FALSE	chr13	50385464	50385714	KPNA3	4	chr13:50385365-50385626@chr13:50385452-50385673@chr13:50385459-50385596@chr13:50385491-50385684	Kidney@Others@Blood@Lung	SRX2055843@SRX5938177@SRX150605@SRX212183
FALSE	chr14	89796695	89796945	FOXN3-AS1	4	chr14:89796692-89796873@chr14:89796702-89796876@chr14:89796722-89796891@chr14:89796943-89797097	Adipocyte@Adipocyte@Lung@Lung	SRX813773@SRX813772@SRX212183@SRX212183
TRUE	chr15	41196240	41196490	SPINT1	4	chr15:41196308-41196461@chr15:41196319-41196450@chr15:41196323-41196478@chr15:41196325-41196464	Blood@Blood@Blood@Blood	SRX150605@SRX017912@SRX150610@SRX017895
TRUE	chr17	41081181	41081431	AOC2	4	chr17:41081292-41081459@chr17:41081292-41081459@chr17:41081363-41081493@chr17:41081363-41081493	Cardiovascular@Cardiovascular@Blood@Blood	SRX2355085@SRX2355085@SRX150362@SRX150362
TRUE	chr18	18633173	18633423	ROCK1	4	chr18:18633079-18633286@chr18:18633171-18633510@chr18:18633278-18633501@chr18:18633321-18633527	Adipocyte@Lung@Adipocyte@Lung	SRX813773@SRX1672130@SRX813774@SRX212183
FALSE	chr1	221135531	221135781	HLX	4	chr1:221135362-221135666@chr1:221135403-221135671@chr1:221135461-221135647@chr1:221135474-221135845	Blood@Adipocyte@Adipocyte@Lung	SRX4001967@SRX813773@SRX813772@SRX212183
TRUE	chr2	216262492	216262742	ATIC	4	chr2:216262578-216262857@chr2:216262604-216262835@chr2:216262607-216262844@chr2:216262653-216262830	Prostate@Prostate@Prostate@Prostate	SRX1885200@SRX1885199@SRX1885171@SRX1885172
FALSE	chr3	52124215	52124465	RPL29	4	chr3:52124123-52124344@chr3:52124123-52124344@chr3:52124126-52124355@chr3:52124126-52124355	Cardiovascular@Cardiovascular@Cardiovascular@Cardiovascular	SRX2207672@SRX2207672@SRX2207673@SRX2207673
TRUE	chr4	40723952	40724202	RBM47	4	chr4:40723758-40724180@chr4:40723853-40724111@chr4:40723876-40724102@chr4:40723950-40724103	Others@Others@Others@Adipocyte	SRX5938177@SRX2404135@SRX2404140@SRX813774
TRUE	chrX	7077201	7077451	STS	4	chrX:7077201-7077441@chrX:7077266-7077434@chrX:7077269-7077428@chrX:7077298-7077458	Uterus@Uterus@Adipocyte@Adipocyte	SRX027912@SRX378805@SRX813772@SRX813773
FALSE	chr1	156584835	156586835	HAPLN2	4	chr1:156586295-156586614@chr1:156586308-156586587@chr1:156586322-156586567@chr1:156586336-156586554	Breast@Cardiovascular@Cardiovascular@Lung	SRX968971@SRX2207672@SRX2207673@SRX1672130
TRUE	chr4	184717924	184719924	STOX2	4	chr4:184718320-184718507@chr4:184718334-184718604@chr4:184718397-184718561@chr4:184718947-184719247	Cardiovascular@Kidney@Cardiovascular@Breast	SRX2207673@SRX2055843@SRX2207672@SRX968971
FALSE	chrX	51545154	51547154	MAGED1	4	chrX:51545991-51546210@chrX:51546002-51546327@chrX:51546031-51546228@chrX:51546060-51546276	Blood@Blood@Blood@Blood	SRX017913@SRX150605@SRX017912@SRX150610
FALSE	chr13	99325445	99325695	SLC15A1	3	chr13:99325306-99325520@chr13:99325395-99325605@chr13:99325422-99325585	Blood@Others@Digestive%20tract	SRX150605@SRX5938177@SRX3102571
TRUE	chr19	41804269	41804519	EXOSC5	3	chr19:41804230-41804580@chr19:41804303-41804435@chr19:41804314-41804491	Blood@Blood@Cardiovascular	SRX4001967@SRX150359@SRX2355081
TRUE	chr10	43857726	43857976	RASGEF1A	3	chr10:43857396-43858261@chr10:43857565-43857968@chr10:43857694-43857827	Digestive%20tract@Others@Blood	SRX359916@SRX5938177@SRX1460848
TRUE	chr14	91631044	91631294	DGLUCY	3	chr14:91631064-91631254@chr14:91631079-91631244@chr14:91631146-91631343	Adipocyte@Adipocyte@Breast	SRX813773@SRX813772@SRX968976
FALSE	chr2	88959183	88959433	EIF2AK3	3	chr2:88959006-88959314@chr2:88959022-88959240@chr2:88959150-88959414	Cardiovascular@Cardiovascular@Others	SRX2207673@SRX2207672@SRX2404140
FALSE	chr2	173380999	173381249	ITGA6	3	chr2:173381174-173381361@chr2:173381205-173381388@chr2:173381206-173381378	Cardiovascular@Cardiovascular@Cardiovascular	SRX7054614@SRX7054611@SRX7054666
FALSE	chr10	89469502	89469752	PAPSS2	3	chr10:89469249-89469578@chr10:89469254-89469604@chr10:89469287-89469551	Adipocyte@Adipocyte@Adipocyte	SRX813772@SRX813773@SRX813774
FALSE	chr11	123008270	123008520	HSPA8	3	chr11:123008122-123008406@chr11:123008164-123008392@chr11:123008292-123008541	Adipocyte@Adipocyte@Blood	SRX813772@SRX813773@SRX4001967
FALSE	chr12	50202632	50202882	TMBIM6	3	chr12:50202476-50202683@chr12:50202482-50202669@chr12:50202495-50202659	Cardiovascular@Lung@Cardiovascular	SRX2207672@SRX212183@SRX2207673
TRUE	chr14	94797292	94797542	SERPINA1	3	chr14:94797178-94797612@chr14:94797192-94797547@chr14:94797315-94797496	Others@Breast@Breast	SRX5938177@SRX968977@SRX747789
FALSE	chr17	12530587	12530837	MYOCD	3	chr17:12530607-12530970@chr17:12530612-12530860@chr17:12530683-12530841	Lung@Cardiovascular@Uterus	SRX212183@SRX7054618@SRX027912
FALSE	chr1	120874208	120874458	FAM72B	3	chr1:120874257-120874390@chr1:120874438-120874612@chr1:120874452-120874627	Adipocyte@Cardiovascular@Uterus	SRX813774@SRX7054614@SRX027913
FALSE	chr1	156478292	156478542	MEF2D	3	chr1:156478084-156478394@chr1:156478101-156478342@chr1:156478174-156478313	Blood@Blood@Blood	SRX2837382@SRX150353@SRX017871
TRUE	chr1	162524078	162524328	UAP1	3	chr1:162524120-162524309@chr1:162524149-162524311@chr1:162524151-162524281	Adipocyte@Adipocyte@Adipocyte	SRX813772@SRX813773@SRX813774
FALSE	chr1	23805516	23805766	ID3	3	chr1:23805358-23805858@chr1:23805415-23805822@chr1:23805557-23805802	Cardiovascular@Cardiovascular@Adipocyte	SRX2207672@SRX2207673@SRX813773
FALSE	chr21	43944788	43945038	RSPH1	3	chr21:43944655-43944881@chr21:43944864-43945129@chr21:43944874-43945074	Blood@Blood@Blood	SRX150557@SRX2837382@SRX150605
FALSE	chr22	18880244	18880494	PRODH	3	chr22:18879763-18880292@chr22:18879995-18880291@chr22:18879996-18880258	Kidney@Blood@Blood	SRX3346353@SRX5371743@SRX5371742
FALSE	chr8	37650822	37651072	ZNF703	3	chr8:37650844-37651065@chr8:37650868-37651070@chr8:37650925-37651073	Adipocyte@Adipocyte@Adipocyte	SRX813773@SRX813772@SRX813774
FALSE	chr6	149534109	149536109	TAB2	3	chr6:149534111-149534304@chr6:149534112-149534266@chr6:149534135-149534251	Blood@Blood@Blood	SRX150605@SRX017912@SRX150610
TRUE	chr18	43647300	43649300	PSTPIP2	3	chr18:43648817-43649054@chr18:43649025-43649244@chr18:43649062-43649230	Adipocyte@Blood@Blood	SRX813774@SRX150605@SRX017912
FALSE	chr4	88893551	88895551	SPP1	3	chr4:88894390-88894801@chr4:88894404-88894751@chr4:88894837-88894960	Cardiovascular@Cardiovascular@Blood	SRX2207673@SRX2207672@SRX150610
FALSE	chr9	139872444	139874444	LCNL1	3	chr9:139872647-139872871@chr9:139872673-139872839@chr9:139872887-139873044	Cardiovascular@Cardiovascular@Cardiovascular	SRX2207672@SRX2207673@SRX2355085
FALSE	chr11	62408196	62408446	TUT1	2	chr11:62408349-62408458@chr11:62408349-62408458	Blood@Blood	SRX1460848@SRX1460848
TRUE	chr11	71947152	71947402	FOLR1	2	chr11:71947222-71947457@chr11:71947286-71947574	Lung@Cardiovascular	SRX212183@SRX2207672
FALSE	chr17	29814819	29815069	RAB11FIP4	2	chr17:29814751-29814866@chr17:29815060-29815201	Blood@Blood	SRX1460848@SRX1460848
FALSE	chr1	39452432	39452682	RHBDL2	2	chr1:39452110-39452660@chr1:39452110-39452660	Cardiovascular@Cardiovascular	SRX2207672@SRX2207672
FALSE	chr2	217437872	217438122	RPL37A	2	chr2:217438062-217438223@chr2:217438078-217438232	Cardiovascular@Cardiovascular	SRX2207673@SRX2207672
TRUE	chr8	130721336	130721586	GSDMC	2	chr8:130721357-130721602@chr8:130721427-130721590	Cardiovascular@Lung	SRX2207672@SRX212183
FALSE	chr8	30169540	30169790	RBPMS	2	chr8:30169500-30169735@chr8:30169510-30169774	Adipocyte@Adipocyte	SRX813774@SRX813773
FALSE	chrX	140198014	140198264	LDOC1	2	chrX:140198012-140198202@chrX:140198051-140198440	Adipocyte@Breast	SRX813772@SRX968971
TRUE	chr14	64905340	64905590	ZBTB1	2	chr14:64905337-64905539@chr14:64905349-64905540	Cardiovascular@Cardiovascular	SRX2207673@SRX2207672
FALSE	chr10	133786002	133786252	JAKMIP3	2	chr10:133786058-133786488@chr10:133786073-133786478	Cardiovascular@Cardiovascular	SRX2207672@SRX2207673
FALSE	chr11	60531480	60531730	CCDC86	2	chr11:60531540-60531747@chr11:60531556-60531713	Blood@Blood	SRX150605@SRX017912
FALSE	chr11	62408196	62408446	B3GAT3	2	chr11:62408349-62408458@chr11:62408349-62408458	Blood@Blood	SRX1460848@SRX1460848
FALSE	chr18	10530814	10531064	APCDD1	2	chr18:10530893-10531102@chr18:10530951-10531115	Cardiovascular@Cardiovascular	SRX7054670@SRX7054663
TRUE	chr1	120816992	120817242	FAM72B	2	chr1:120817108-120817464@chr1:120817125-120817461	Cardiovascular@Cardiovascular	SRX2207673@SRX2207672
FALSE	chr1	39452432	39452682	AKIRIN1	2	chr1:39452110-39452660@chr1:39452110-39452660	Cardiovascular@Cardiovascular	SRX2207672@SRX2207672
FALSE	chr3	156320311	156320561	SSR3	2	chr3:156320362-156320660@chr3:156320425-156320663	Lung@Lung	SRX1672130@SRX1672129
FALSE	chr4	40047980	40048230	PDS5A	2	chr4:40048007-40048272@chr4:40048086-40048192	Cardiovascular@Blood	SRX2207672@SRX1460847
FALSE	chr6	136907499	136907749	MAP7	2	chr6:136907564-136907718@chr6:136907614-136907790	Lung@Cardiovascular	SRX212183@SRX7055006
TRUE	chr10	11784205	11786205	ECHDC3	2	chr10:11784224-11784394@chr10:11784379-11784598	Cardiovascular@Cardiovascular	SRX2355078@SRX2207672
FALSE	chr15	76550043	76552043	TYRO3P	2	chr15:76549764-76550121@chr15:76549797-76550109	Kidney@Kidney	SRX2255900@SRX1457748
FALSE	chr6	27218151	27220151	PRSS16	2	chr6:27218811-27219166@chr6:27219681-27219922	Digestive%20tract@Others	SRX359916@SRX5938177
FALSE	chr10	5670877	5671127	ASB13	1	chr10:5670886-5671004	Blood	SRX1460848
FALSE	chr14	23615061	23615311	SLC7A8	1	chr14:23615061-23615227	Adipocyte	SRX813773
FALSE	chr16	68436230	68436480	SMPD3	1	chr16:68436252-68436401	Adipocyte	SRX813774
TRUE	chr22	45554808	45555058	NUP50	1	chr22:45554967-45555127	Adipocyte	SRX813773
TRUE	chr2	180702201	180702451	ZNF385B	1	chr2:180702239-180702478	Others	SRX5938177
FALSE	chr2	217546970	217547220	IGFBP2	1	chr2:217547034-217547454	Others	SRX5938177
FALSE	chr2	238928618	238928868	ESPNL	1	chr2:238928686-238928846	Adipocyte	SRX813773
FALSE	chr2	70834298	70834548	TGFA	1	chr2:70834335-70834508	Kidney	SRX2055843
FALSE	chr5	168074169	168074419	PANK3	1	chr5:168074131-168074401	Others	SRX5938177
FALSE	chr6	112139745	112139995	FYN	1	chr6:112139866-112140041	Lung	SRX212183
FALSE	chr7	106762888	106763138	PRKAR2B	1	chr7:106762977-106763208	Lung	SRX212183
TRUE	chr9	107554178	107554428	NIPSNAP3A	1	chr9:107554141-107554369	Others	SRX2404135
TRUE	chrX	85257568	85257818	CHM	1	chrX:85257609-85257797	Digestive%20tract	SRX3102571
TRUE	chr22	31457154	31457404	RNF185	1	chr22:31457250-31457515	Others	SRX5938177
TRUE	chr10	77032676	77032926	COMTD1	1	chr10:77032683-77032935	Lung	SRX212183
TRUE	chr10	89378593	89378843	PAPSS2	1	chr10:89378646-89378803	Breast	SRX968976
FALSE	chr12	63292350	63292600	PPM1H	1	chr12:63292432-63292672	Others	SRX5938177
TRUE	chr12	93957662	93957912	SOCS2	1	chr12:93957569-93957909	Others	SRX2404134
FALSE	chr14	23288841	23289091	MRPL52	1	chr14:23288901-23289062	Cardiovascular	SRX2207673
FALSE	chr14	31847254	31847504	HEATR5A	1	chr14:31847320-31847475	Blood	SRX150605
FALSE	chr14	90832055	90832305	NRDE2	1	chr14:90831832-90832081	Adipocyte	SRX813774
FALSE	chr16	21529081	21529331	SMG1P3	1	chr16:21528760-21529249	Kidney	SRX2055843
FALSE	chr16	70759411	70759661	VAC14	1	chr16:70759164-70759520	Liver	SRX2270129
FALSE	chr17	80943989	80944239	METRNL	1	chr17:80944033-80944232	Cardiovascular	SRX2207672
FALSE	chr1	13904362	13904612	PDPN	1	chr1:13904163-13904485	Breast	SRX968971
FALSE	chr1	203417824	203418074	PRELP	1	chr1:203417979-203418113	Adipocyte	SRX813774
FALSE	chr1	8177073	8177323	ERRFI1	1	chr1:8177048-8177264	Lung	SRX212183
TRUE	chr20	39748508	39748758	TOP1	1	chr20:39748461-39748682	Others	SRX5938177
FALSE	chr3	158464772	158465022	LXN	1	chr3:158464791-158465086	Kidney	SRX3636885
TRUE	chr4	1171098	1171348	SPON2	1	chr4:1170973-1171233	Kidney	SRX3636885
FALSE	chr7	75929620	75929870	YWHAG	1	chr7:75929596-75929864	Others	SRX5938177
FALSE	chr8	102016192	102016442	YWHAZ	1	chr8:102016317-102016618	Others	SRX5938177
TRUE	chr16	19895006	19897006	GPRC5B	1	chr16:19894691-19895060	Cardiovascular	SRX7054621
TRUE	chr17	79859684	79861684	NPB	1	chr17:79860727-79860909	Blood	SRX2837382
FALSE	chr3	119276531	119278531	CD80	1	chr3:119278414-119278574	Blood	SRX150605
FALSE	chr4	174451328	174453328	HAND2	1	chr4:174451295-174451450	Cardiovascular	SRX2207672
FALSE	chr4	174451350	174453350	HAND2-AS1	1	chr4:174451295-174451450	Cardiovascular	SRX2207672
FALSE	chr8	11652781	11654781	FDFT1	1	chr8:11653513-11653683	Adipocyte	SRX813774
TRUE	chr15	72329740	72329990	MYO9A	0
TRUE	chr6	112100674	112100924	FYN	0
FALSE	chr9	115510306	115510556	INIP	0
FALSE	chrX	57956608	57956858	ZXDA	0
FALSE	chr10	5694266	5694516	ASB13	0
FALSE	chr10	89358572	89358822	MINPP1	0
FALSE	chr11	109958776	109959026	ZC3H12C	0
TRUE	chr11	119246966	119247216	USP2	0
FALSE	chr12	12520506	12520756	BORCS5	0
FALSE	chr12	285646	285896	SLC6A12	0
FALSE	chr12	32615112	32615362	FGD4	0
FALSE	chr12	46631180	46631430	SLC38A1	0
FALSE	chr12	47183950	47184200	SLC38A4	0
FALSE	chr12	69723858	69724108	CPSF6	0
FALSE	chr12	9246600	9246850	A2M	0
FALSE	chr13	52098623	52098873	INTS6	0
TRUE	chr14	101254805	101255055	RTL1	0
FALSE	chr14	23643494	23643744	SLC7A8	0
TRUE	chr14	32724279	32724529	AKAP6	0
FALSE	chr14	90762580	90762830	PSMC1	0
FALSE	chr15	28352466	28352716	OCA2	0
TRUE	chr15	41870602	41870852	LTK	0
FALSE	chr15	89257979	89258229	AEN	0
FALSE	chr16	436877	437127	NME4	0
TRUE	chr17	29741015	29741265	RAB11FIP4	0
FALSE	chr17	48497991	48498241	ACSF2	0
FALSE	chr18	46514216	46514466	SMAD7	0
FALSE	chr19	18215134	18215384	MAST3	0
TRUE	chr19	35626308	35626558	FXYD3	0
FALSE	chr1	108469272	108469522	VAV3	0
FALSE	chr1	108577083	108577333	VAV3	0
FALSE	chr1	200008754	200009004	NR5A2	0
FALSE	chr1	24175664	24175914	PITHD1	0
FALSE	chr20	35568192	35568442	SAMHD1	0
FALSE	chr2	207106658	207106908	NDUFS1	0
FALSE	chr2	217433329	217433579	RPL37A	0
FALSE	chr2	217442298	217442548	RPL37A	0
FALSE	chr3	189847906	189848156	P3H2	0
FALSE	chr3	189901007	189901257	P3H2	0
FALSE	chr3	58063578	58063828	FLNB	0
FALSE	chr4	108646524	108646774	PAPSS1	0
FALSE	chr4	113178384	113178634	TIFA	0
FALSE	chr4	79739780	79740030	BMP2K	0
FALSE	chr5	147451776	147452026	SPINK5	0
FALSE	chr5	43203601	43203851	NIM1K	0
FALSE	chr5	55068980	55069230	SLC38A9	0
FALSE	chr5	80283193	80283443	RASGRF2	0
FALSE	chr6	116447172	116447422	COL10A1	0
FALSE	chr6	116454075	116454325	COL10A1	0
FALSE	chr6	116458151	116458401	COL10A1	0
TRUE	chr6	13281856	13282106	TBC1D7	0
FALSE	chr7	141375290	141375540	SSBP1	0
FALSE	chr7	150704694	150704944	KCNH2	0
FALSE	chr7	16739661	16739911	BZW2	0
FALSE	chr7	96583459	96583709	DLX5	0
FALSE	chr8	130774471	130774721	GSDMC	0
FALSE	chr9	118912121	118912371	PAPPA	0
FALSE	chr9	95673894	95674144	FGD3	0
TRUE	chr9	98315376	98315626	PTCH1	0
FALSE	chrX	106748524	106748774	FRMPD3	0
FALSE	chrX	106809476	106809726	FRMPD3	0
FALSE	chrX	106922286	106922536	TSC22D3	0
TRUE	chr16	51198096	51198346	SALL1	0
FALSE	chr18	60970234	60970484	BCL2	0
FALSE	chr20	55857618	55857868	RAE1	0
TRUE	chr4	102227415	102227665	PPP3CA	0
TRUE	chr5	149299059	149299309	HMGXB3	0
TRUE	chr5	43683969	43684219	NNT	0
TRUE	chr8	143758472	143758722	LY6K	0
TRUE	chr10	11618060	11618310	USP6NL	0
FALSE	chr10	77051722	77051972	COMTD1	0
FALSE	chr10	89358572	89358822	PAPSS2	0
FALSE	chr10	93566926	93567176	TNKS2	0
FALSE	chr11	100580072	100580322	ARHGAP42	0
TRUE	chr11	61185799	61186049	DDB1	0
FALSE	chr11	61829313	61829563	FTH1	0
FALSE	chr11	73126194	73126444	RELT	0
FALSE	chr12	121199472	121199722	MLEC	0
FALSE	chr12	26959134	26959384	ITPR2	0
TRUE	chr12	48391485	48391735	COL2A1	0
TRUE	chr12	88896244	88896494	KITLG	0
FALSE	chr13	30890412	30890662	KATNAL1	0
FALSE	chr13	30893851	30894101	KATNAL1	0
FALSE	chr13	49894514	49894764	CDADC1	0
FALSE	chr13	52098623	52098873	WDFY2	0
FALSE	chr14	31443920	31444170	STRN3	0
TRUE	chr14	35603970	35604220	FAM177A1	0
TRUE	chr14	89794210	89794460	FOXN3-AS1	0
TRUE	chr14	89947548	89947798	FOXN3-AS1	0
FALSE	chr14	90762580	90762830	NRDE2	0
FALSE	chr15	31215096	31215346	MTMR10	0
TRUE	chr15	41870602	41870852	TYRO3	0
FALSE	chr15	53029982	53030232	FAM214A	0
TRUE	chr15	83587974	83588224	HOMER2	0
FALSE	chr15	89257979	89258229	ACAN	0
FALSE	chr15	99111282	99111532	IGF1R	0
FALSE	chr16	21519976	21520226	SMG1P3	0
FALSE	chr16	23076027	23076277	USP31	0
FALSE	chr16	293514	293764	FAM234A	0
FALSE	chr16	436877	437127	MRPL28	0
FALSE	chr16	58575488	58575738	CNOT1	0
FALSE	chr16	58848551	58848801	GOT2	0
FALSE	chr16	66912068	66912318	RRAD	0
FALSE	chr16	82106021	82106271	MPHOSPH6	0
FALSE	chr17	47890880	47891130	FAM117A	0
FALSE	chr17	47939069	47939319	FAM117A	0
FALSE	chr17	48497991	48498241	LRRC59	0
FALSE	chr17	54635438	54635688	NOG	0
FALSE	chr17	54694730	54694980	NOG	0
FALSE	chr17	73772187	73772437	WBP2	0
TRUE	chr17	81059815	81060065	METRNL	0
FALSE	chr18	48185455	48185705	MAPK4	0
FALSE	chr18	48622549	48622799	SMAD4	0
FALSE	chr18	55064626	55064876	ONECUT2	0
FALSE	chr19	50682497	50682747	MYH14	0
FALSE	chr19	58995298	58995548	UBE2M	0
TRUE	chr1	110852396	110852646	RBM15	0
FALSE	chr1	112992308	112992558	CTTNBP2NL	0
FALSE	chr1	218492652	218492902	RRP15	0
TRUE	chr1	236160422	236160672	NID1	0
TRUE	chr1	31247858	31248108	LAPTM5	0
FALSE	chr1	71418300	71418550	PTGER3	0
FALSE	chr1	90408674	90408924	GEMIN8P4	0
FALSE	chr1	90456545	90456795	GEMIN8P4	0
FALSE	chr20	13769044	13769294	NDUFAF5	0
FALSE	chr20	30258240	30258490	ID1	0
FALSE	chr20	39591315	39591565	TOP1	0
TRUE	chr20	43983136	43983386	SDC4	0
FALSE	chr20	44446430	44446680	ACOT8	0
TRUE	chr20	61462778	61463028	COL9A3	0
FALSE	chr20	806728	806978	FAM110A	0
FALSE	chr21	22400634	22400884	NCAM2	0
FALSE	chr21	46975662	46975912	SLC19A1	0
FALSE	chr21	46990773	46991023	SLC19A1	0
FALSE	chr21	46993433	46993683	SLC19A1	0
TRUE	chr22	30737346	30737596	SEC14L2	0
FALSE	chr2	10799102	10799352	NOL10	0
TRUE	chr2	127852337	127852587	BIN1	0
FALSE	chr2	142981567	142981817	LRP1B	0
TRUE	chr2	165637284	165637534	COBLL1	0
FALSE	chr2	207106658	207106908	ZDBF2	0
TRUE	chr2	208652593	208652843	FZD5	0
TRUE	chr2	235892438	235892688	SH3BP4	0
FALSE	chr2	39607914	39608164	MAP4K3	0
FALSE	chr2	98573946	98574196	TMEM131	0
FALSE	chr3	151255588	151255838	IGSF10	0
FALSE	chr3	189847906	189848156	P3H2-AS1	0
FALSE	chr3	189901007	189901257	P3H2-AS1	0
FALSE	chr3	195218154	195218404	ACAP2	0
FALSE	chr3	195790474	195790724	TFRC	0
FALSE	chr3	37117564	37117814	EPM2AIP1	0
FALSE	chr3	37166694	37166944	LRRFIP2	0
FALSE	chr3	77019404	77019654	ROBO2	0
FALSE	chr3	77130466	77130716	ROBO2	0
FALSE	chr4	156344913	156345163	MAP9	0
TRUE	chr4	40618728	40618978	RBM47	0
FALSE	chr5	134929702	134929952	CXCL14	0
FALSE	chr5	147742036	147742286	SPINK9	0
FALSE	chr5	154137576	154137826	FAXDC2	0
FALSE	chr5	154286670	154286920	FAXDC2	0
FALSE	chr5	179805727	179805977	GFPT2	0
TRUE	chr5	6505191	6505441	UBE2QL1	0
FALSE	chr5	65929796	65930046	MAST4	0
FALSE	chr5	74105490	74105740	GFM2	0
FALSE	chr5	89842908	89843158	ADGRV1	0
TRUE	chr5	95095416	95095666	RHOBTB3	0
FALSE	chr6	125329356	125329606	RNF217	0
FALSE	chr6	127736386	127736636	ECHDC1	0
TRUE	chr6	136151796	136152046	PDE7B	0
FALSE	chr6	157831124	157831374	ZDHHC14	0
FALSE	chr6	160188062	160188312	ACAT2	0
FALSE	chr6	74307566	74307816	CD109	0
FALSE	chr6	84171237	84171487	PRSS35	0
FALSE	chr6	88455362	88455612	AKIRIN2	0
FALSE	chr7	141375290	141375540	TAS2R3	0
FALSE	chr7	142937382	142937632	GSTK1	0
FALSE	chr7	16739661	16739911	ANKMY2	0
FALSE	chr7	5270212	5270462	SLC29A4	0
FALSE	chr7	83272400	83272650	SEMA3E	0
FALSE	chr7	96583459	96583709	DLX6	0
TRUE	chr8	10617886	10618136	PINX1	0
FALSE	chr8	37462002	37462252	ZNF703	0
FALSE	chr8	42937106	42937356	POMK	0
FALSE	chr8	48837718	48837968	UBE2V2	0
TRUE	chr8	9472511	9472761	TNKS	0
FALSE	chr9	100721208	100721458	ANP32B	0
FALSE	chr9	112215122	112215372	PTPN3	0
FALSE	chr9	140163747	140163997	TUBB4B	0
FALSE	chr9	71693626	71693876	FXN	0
FALSE	chrX	130996432	130996682	FIRRE	0
FALSE	chrX	150555857	150556107	VMA21	0
TRUE	chrX	43449034	43449284	MAOA	0
TRUE	chr16	29690178	29692178	QPRT	0
TRUE	chr4	88445655	88447655	SPARCL1	0
FALSE	chrX	131260200	131262200	FRMD7	0
FALSE	chr11	74445180	74447180	CHRDL2	0
TRUE	chr13	93878960	93880960	GPC6	0
FALSE	chr14	81889448	81891448	STON2	0
FALSE	chr15	63571998	63573998	APH1B	0
TRUE	chr16	1203690	1205690	CACNA1H	0
TRUE	chr19	3535704	3537704	C19orf71	0
FALSE	chr19	55477296	55479296	NLRP2	0
FALSE	chr20	62681179	62683179	SOX18	0
FALSE	chr2	119603659	119605659	EN1	0
FALSE	chr3	13113517	13115517	IQSEC1	0
TRUE	chr3	48467560	48469560	PLXNB1	0
FALSE	chr4	88569353	88571353	DMP1	0
FALSE	chr5	142810877	142812877	NR3C1	0
FALSE	chr5	76145775	76147775	S100Z	0
TRUE	chr6	1977408	1979408	TUBB	0
FALSE	chrX	152224215	152226215	PNMA3	0
TRUE	chrX	63003626	63005626	ARHGEF9	0

## Sheet: supplementary file 5c
RELA ChIP-seq and Motif hits within TGF-biased peak sets (articular chondrocytes)
MOTIF_PRED	chr	start	end	gene	num_hits	hits	sources	ID
TRUE	chr15	65176234	65176484	PLEKHO2	220	chr15:65176138-65176670@chr15:65176138-65176670@chr15:65176189-65176621@chr15:65176189-65176621@chr15:65176189-65176630@chr15:65176189-65176630@chr15:65176190-65176675@chr15:65176190-65176675@chr15:65176199-65176586@chr15:65176199-65176586@chr15:65176206-65176582@chr15:65176206-65176582@chr15:65176210-65176584@chr15:65176210-65176584@chr15:65176211-65176600@chr15:65176211-65176600@chr15:65176212-…	Cardiovascular@Cardiovascular@Cardiovascular@Cardiovascular@Cardiovascular@Cardiovascular@Cardiovascular@Cardiovascular@Cardiovascular@Cardiovascular@Cardiovascular@Cardiovascular@Blood@Blood@Cardiovascular@Cardiovascular@Others@Others@Kidney@Kidney@Cardiovascular@Cardiovascular@Cardiovascular@Cardiovascular@Cardiovascular@Cardiovascular@Cardiovascular@Cardiovascular@Cardiovascular@Cardiovascular…	SRX2207673@SRX2207673@SRX7054666@SRX7054666@SRX7054661@SRX7054661@SRX2207672@SRX2207672@SRX425263@SRX425263@SRX425264@SRX425264@SRX150605@SRX150605@SRX7054614@SRX7054614@SRX5938177@SRX5938177@SRX3346352@SRX3346352@SRX7054617@SRX7054617@SRX7054619@SRX7054619@SRX2355083@SRX2355083@SRX7055007@SRX7055007@SRX2355079@SRX2355079@SRX7054670@SRX7054670@SRX7054618@SRX7054618@SRX7054665@SRX7054665@SRX494772…
TRUE	chr15	65176234	65176484	ANKDD1A	220	chr15:65176138-65176670@chr15:65176138-65176670@chr15:65176189-65176621@chr15:65176189-65176621@chr15:65176189-65176630@chr15:65176189-65176630@chr15:65176190-65176675@chr15:65176190-65176675@chr15:65176199-65176586@chr15:65176199-65176586@chr15:65176206-65176582@chr15:65176206-65176582@chr15:65176210-65176584@chr15:65176210-65176584@chr15:65176211-65176600@chr15:65176211-65176600@chr15:65176212-…	Cardiovascular@Cardiovascular@Cardiovascular@Cardiovascular@Cardiovascular@Cardiovascular@Cardiovascular@Cardiovascular@Cardiovascular@Cardiovascular@Cardiovascular@Cardiovascular@Blood@Blood@Cardiovascular@Cardiovascular@Others@Others@Kidney@Kidney@Cardiovascular@Cardiovascular@Cardiovascular@Cardiovascular@Cardiovascular@Cardiovascular@Cardiovascular@Cardiovascular@Cardiovascular@Cardiovascular…	SRX2207673@SRX2207673@SRX7054666@SRX7054666@SRX7054661@SRX7054661@SRX2207672@SRX2207672@SRX425263@SRX425263@SRX425264@SRX425264@SRX150605@SRX150605@SRX7054614@SRX7054614@SRX5938177@SRX5938177@SRX3346352@SRX3346352@SRX7054617@SRX7054617@SRX7054619@SRX7054619@SRX2355083@SRX2355083@SRX7055007@SRX7055007@SRX2355079@SRX2355079@SRX7054670@SRX7054670@SRX7054618@SRX7054618@SRX7054665@SRX7054665@SRX494772…
TRUE	chr1	37941318	37943318	ZC3H12A	182	chr1:37942109-37942473@chr1:37942116-37942606@chr1:37942124-37942599@chr1:37942134-37942485@chr1:37942145-37942484@chr1:37942151-37942536@chr1:37942153-37942492@chr1:37942157-37942549@chr1:37942157-37942554@chr1:37942160-37942475@chr1:37942161-37942516@chr1:37942168-37942520@chr1:37942171-37942433@chr1:37942172-37942468@chr1:37942172-37942499@chr1:37942180-37942507@chr1:37942181-37942454@chr1:379…	Cardiovascular@Cardiovascular@Cardiovascular@Cardiovascular@Cardiovascular@Cardiovascular@Cardiovascular@Cardiovascular@Others@Cardiovascular@Cardiovascular@Cardiovascular@Others@Others@Cardiovascular@Cardiovascular@Cardiovascular@Cardiovascular@Cardiovascular@Others@Cardiovascular@Others@Cardiovascular@Cardiovascular@Cardiovascular@Cardiovascular@Cardiovascular@Cardiovascular@Cardiovascular@Othe…	SRX4947721@SRX2207672@SRX2207673@SRX4947720@SRX112016@SRX7054619@SRX7055007@SRX7054661@SRX5938177@SRX7054664@SRX7054618@SRX7054617@SRX2404142@SRX2404140@SRX7054671@SRX7054670@SRX7054616@SRX7054666@SRX7054663@SRX2404135@SRX7054614@SRX2404134@SRX7055004@SRX7054622@SRX7054659@SRX7054615@SRX7054621@SRX7054662@SRX7054672@SRX2404137@SRX7055008@SRX7054623@SRX2404141@SRX7054624@SRX2355085@SRX7055006@SRX7…
TRUE	chr1	150206904	150208904	ANP32E	176	chr1:150206699-150207372@chr1:150206715-150207334@chr1:150206781-150207238@chr1:150206797-150207344@chr1:150206812-150207288@chr1:150206825-150207263@chr1:150206830-150207210@chr1:150206837-150207210@chr1:150206842-150207206@chr1:150206843-150207320@chr1:150206850-150207230@chr1:150206854-150207253@chr1:150206854-150207357@chr1:150206855-150207237@chr1:150206857-150207133@chr1:150206857-150207269…	Cardiovascular@Cardiovascular@Cardiovascular@Blood@Kidney@Blood@Cardiovascular@Blood@Cardiovascular@Blood@Cardiovascular@Cardiovascular@Blood@Cardiovascular@Cardiovascular@Others@Cardiovascular@Blood@Cardiovascular@Cardiovascular@Cardiovascular@Others@Blood@Cardiovascular@Cardiovascular@Cardiovascular@Uterus@Blood@Blood@Cardiovascular@Cardiovascular@Cardiovascular@Blood@Breast@Blood@Adipocyte@Car…	SRX2207672@SRX2207673@SRX7055007@SRX150605@SRX2055843@SRX017912@SRX7054661@SRX2837382@SRX7054670@SRX017913@SRX7054666@SRX2355083@SRX150557@SRX7054617@SRX7054616@SRX5938177@SRX7054614@SRX150610@SRX7055006@SRX7054618@SRX7054611@SRX2404136@SRX017891@SRX4947721@SRX7054664@SRX7054619@SRX027912@SRX150606@SRX4401064@SRX4947720@SRX112016@SRX7054662@SRX150362@SRX968976@SRX017906@SRX813774@SRX2355085@SRX11…
TRUE	chr19	50143450	50145450	RRAS	172	chr19:50143266-50144184@chr19:50143283-50143698@chr19:50143308-50144123@chr19:50143319-50144193@chr19:50143329-50144134@chr19:50143335-50144150@chr19:50143341-50144136@chr19:50143347-50143778@chr19:50143353-50144093@chr19:50143356-50144181@chr19:50143358-50144126@chr19:50143359-50144148@chr19:50143360-50144113@chr19:50143361-50143816@chr19:50143362-50144089@chr19:50143365-50144170@chr19:50143369-…	Cardiovascular@Kidney@Cardiovascular@Cardiovascular@Cardiovascular@Cardiovascular@Cardiovascular@Kidney@Cardiovascular@Cardiovascular@Cardiovascular@Cardiovascular@Cardiovascular@Cardiovascular@Cardiovascular@Cardiovascular@Cardiovascular@Cardiovascular@Cardiovascular@Cardiovascular@Cardiovascular@Cardiovascular@Cardiovascular@Cardiovascular@Cardiovascular@Kidney@Others@Cardiovascular@Cardiovascu…	SRX2207673@SRX3346352@SRX7054664@SRX2207672@SRX7055007@SRX7054614@SRX2355085@SRX2055843@SRX7054663@SRX7054661@SRX7054618@SRX7054666@SRX2355079@SRX7054622@SRX2355078@SRX7054617@SRX7054670@SRX7054662@SRX2355081@SRX7054671@SRX7054611@SRX7055004@SRX7054621@SRX7055006@SRX7054668@SRX3636885@SRX5938177@SRX7054659@SRX7054616@SRX7054665@SRX7054613@SRX7054667@SRX2355083@SRX7054657@SRX7054660@SRX7054612@SRX…
TRUE	chr2	10176372	10176622	CYS1	170	chr2:10176004-10176680@chr2:10176004-10176680@chr2:10176123-10176605@chr2:10176123-10176605@chr2:10176137-10176610@chr2:10176137-10176610@chr2:10176163-10176567@chr2:10176163-10176567@chr2:10176183-10176514@chr2:10176183-10176514@chr2:10176184-10176547@chr2:10176184-10176547@chr2:10176184-10176608@chr2:10176184-10176608@chr2:10176185-10176519@chr2:10176185-10176519@chr2:10176192-10176638@chr2:101…	Kidney@Kidney@Kidney@Kidney@Kidney@Kidney@Cardiovascular@Cardiovascular@Cardiovascular@Cardiovascular@Cardiovascular@Cardiovascular@Kidney@Kidney@Blood@Blood@Cardiovascular@Cardiovascular@Cardiovascular@Cardiovascular@Cardiovascular@Cardiovascular@Cardiovascular@Cardiovascular@Cardiovascular@Cardiovascular@Cardiovascular@Cardiovascular@Cardiovascular@Cardiovascular@Cardiovascular@Cardiovascular@C…	SRX2055843@SRX2055843@SRX3636885@SRX3636885@SRX3346352@SRX3346352@SRX7054661@SRX7054661@SRX425263@SRX425263@SRX2355083@SRX2355083@SRX3346353@SRX3346353@SRX2837382@SRX2837382@SRX2207672@SRX2207672@SRX7054617@SRX7054617@SRX425264@SRX425264@SRX2207673@SRX2207673@SRX7054621@SRX7054621@SRX7054670@SRX7054670@SRX2355079@SRX2355079@SRX2355085@SRX2355085@SRX7055007@SRX7055007@SRX7054618@SRX7054618@SRX7054…
TRUE	chr2	10176372	10176622	RRM2	170	chr2:10176004-10176680@chr2:10176004-10176680@chr2:10176123-10176605@chr2:10176123-10176605@chr2:10176137-10176610@chr2:10176137-10176610@chr2:10176163-10176567@chr2:10176163-10176567@chr2:10176183-10176514@chr2:10176183-10176514@chr2:10176184-10176547@chr2:10176184-10176547@chr2:10176184-10176608@chr2:10176184-10176608@chr2:10176185-10176519@chr2:10176185-10176519@chr2:10176192-10176638@chr2:101…	Kidney@Kidney@Kidney@Kidney@Kidney@Kidney@Cardiovascular@Cardiovascular@Cardiovascular@Cardiovascular@Cardiovascular@Cardiovascular@Kidney@Kidney@Blood@Blood@Cardiovascular@Cardiovascular@Cardiovascular@Cardiovascular@Cardiovascular@Cardiovascular@Cardiovascular@Cardiovascular@Cardiovascular@Cardiovascular@Cardiovascular@Cardiovascular@Cardiovascular@Cardiovascular@Cardiovascular@Cardiovascular@C…	SRX2055843@SRX2055843@SRX3636885@SRX3636885@SRX3346352@SRX3346352@SRX7054661@SRX7054661@SRX425263@SRX425263@SRX2355083@SRX2355083@SRX3346353@SRX3346353@SRX2837382@SRX2837382@SRX2207672@SRX2207672@SRX7054617@SRX7054617@SRX425264@SRX425264@SRX2207673@SRX2207673@SRX7054621@SRX7054621@SRX7054670@SRX7054670@SRX2355079@SRX2355079@SRX2355085@SRX2355085@SRX7055007@SRX7055007@SRX7054618@SRX7054618@SRX7054…
TRUE	chr19	3761173	3763173	APBA3	161	chr19:3761353-3761715@chr19:3761396-3761833@chr19:3761400-3761801@chr19:3761405-3761890@chr19:3761408-3761820@chr19:3761420-3761801@chr19:3761420-3762052@chr19:3761421-3761908@chr19:3761422-3761774@chr19:3761423-3761770@chr19:3761424-3761882@chr19:3761425-3761868@chr19:3761441-3761740@chr19:3761441-3761769@chr19:3761443-3761886@chr19:3761454-3761885@chr19:3761461-3761873@chr19:3761463-3761830@chr…	Breast@Cardiovascular@Cardiovascular@Cardiovascular@Cardiovascular@Cardiovascular@Digestive%20tract@Kidney@Cardiovascular@Cardiovascular@Kidney@Cardiovascular@Cardiovascular@Cardiovascular@Cardiovascular@Cardiovascular@Cardiovascular@Cardiovascular@Kidney@Cardiovascular@Cardiovascular@Cardiovascular@Cardiovascular@Cardiovascular@Cardiovascular@Blood@Blood@Prostate@Cardiovascular@Blood@Cardiovascu…	SRX1100313@SRX2207672@SRX2355083@SRX7054661@SRX2207673@SRX7055007@SRX359916@SRX2055843@SRX2355079@SRX425263@SRX3636885@SRX7054617@SRX294971@SRX4947721@SRX7054670@SRX7054666@SRX7054614@SRX7054618@SRX3346352@SRX7054657@SRX7054621@SRX7054662@SRX7054611@SRX7054667@SRX2355085@SRX2837382@SRX150353@SRX1885171@SRX425264@SRX150359@SRX7054619@SRX7055006@SRX7054615@SRX5938177@SRX7054664@SRX7055005@SRX150608…
TRUE	chr3	10233779	10234029	IRAK2	153	chr3:10233539-10234197@chr3:10233544-10234187@chr3:10233563-10234180@chr3:10233564-10233972@chr3:10233567-10234363@chr3:10233569-10234148@chr3:10233579-10234223@chr3:10233585-10234167@chr3:10233594-10234190@chr3:10233595-10234164@chr3:10233608-10234188@chr3:10233612-10234169@chr3:10233615-10234174@chr3:10233624-10234128@chr3:10233635-10234145@chr3:10233635-10234147@chr3:10233642-10234135@chr3:102…	Cardiovascular@Cardiovascular@Cardiovascular@Digestive%20tract@Kidney@Cardiovascular@Others@Cardiovascular@Cardiovascular@Cardiovascular@Lung@Cardiovascular@Cardiovascular@Cardiovascular@Cardiovascular@Cardiovascular@Cardiovascular@Cardiovascular@Cardiovascular@Others@Kidney@Cardiovascular@Cardiovascular@Cardiovascular@Cardiovascular@Breast@Breast@Cardiovascular@Cardiovascular@Lung@Cardiovascular…	SRX7054661@SRX2207672@SRX7054614@SRX359916@SRX2055843@SRX7054671@SRX5938177@SRX7055006@SRX7054666@SRX7054617@SRX1672133@SRX7054619@SRX7055007@SRX4947721@SRX7054657@SRX7054622@SRX7054610@SRX7054664@SRX7054621@SRX2404132@SRX3636885@SRX7055008@SRX2355079@SRX7054663@SRX7055004@SRX968976@SRX968978@SRX7054662@SRX7054665@SRX212183@SRX7054668@SRX7054670@SRX7054609@SRX1672129@SRX2404140@SRX2355085@SRX7054…
TRUE	chr8	22932191	22932441	TNFRSF10D	153	chr8:22931873-22932819@chr8:22931883-22932834@chr8:22931901-22932489@chr8:22931928-22932462@chr8:22931967-22932488@chr8:22931974-22932511@chr8:22931984-22932678@chr8:22932008-22932520@chr8:22932046-22932531@chr8:22932066-22932582@chr8:22932078-22932555@chr8:22932081-22932568@chr8:22932084-22932557@chr8:22932087-22932593@chr8:22932088-22932598@chr8:22932089-22932518@chr8:22932092-22932532@chr8:229…	Cardiovascular@Cardiovascular@Blood@Blood@Blood@Cardiovascular@Kidney@Cardiovascular@Cardiovascular@Kidney@Others@Kidney@Cardiovascular@Kidney@Others@Cardiovascular@Cardiovascular@Cardiovascular@Cardiovascular@Cardiovascular@Cardiovascular@Cardiovascular@Cardiovascular@Others@Cardiovascular@Lung@Cardiovascular@Cardiovascular@Others@Lung@Cardiovascular@Cardiovascular@Blood@Cardiovascular@Cardiovas…	SRX2207672@SRX2207673@SRX150605@SRX4001967@SRX150610@SRX7054657@SRX2055843@SRX7055007@SRX7054617@SRX3636885@SRX2404134@SRX3346352@SRX7054661@SRX3346353@SRX2404140@SRX7054619@SRX7055006@SRX7054666@SRX425264@SRX7054614@SRX425263@SRX2355079@SRX7054671@SRX2404132@SRX7054616@SRX1672130@SRX7054668@SRX7054621@SRX5938177@SRX1672133@SRX2355083@SRX7054611@SRX150353@SRX7054670@SRX7054618@SRX7054622@SRX70546…
TRUE	chr1	153521758	153522008	S100A6	148	chr1:153521554-153522154@chr1:153521554-153522154@chr1:153521561-153522150@chr1:153521561-153522150@chr1:153521617-153522078@chr1:153521617-153522078@chr1:153521658-153522096@chr1:153521658-153522096@chr1:153521666-153522129@chr1:153521666-153522129@chr1:153521672-153522099@chr1:153521672-153522099@chr1:153521674-153522055@chr1:153521674-153522055@chr1:153521676-153522036@chr1:153521676-153522036…	Cardiovascular@Cardiovascular@Cardiovascular@Cardiovascular@Cardiovascular@Cardiovascular@Cardiovascular@Cardiovascular@Others@Others@Cardiovascular@Cardiovascular@Cardiovascular@Cardiovascular@Lung@Lung@Cardiovascular@Cardiovascular@Cardiovascular@Cardiovascular@Cardiovascular@Cardiovascular@Cardiovascular@Cardiovascular@Cardiovascular@Cardiovascular@Cardiovascular@Cardiovascular@Cardiovascular@…	SRX2207673@SRX2207673@SRX2207672@SRX2207672@SRX4947721@SRX4947721@SRX7054661@SRX7054661@SRX5938177@SRX5938177@SRX7054666@SRX7054666@SRX7054670@SRX7054670@SRX1672130@SRX1672130@SRX7054619@SRX7054619@SRX7054617@SRX7054617@SRX112016@SRX112016@SRX4947720@SRX4947720@SRX2355085@SRX2355085@SRX7054623@SRX7054623@SRX7054614@SRX7054614@SRX7054665@SRX7054665@SRX7054610@SRX7054610@SRX7054616@SRX7054616@SRX24…
TRUE	chr1	153521758	153522008	S100A4	148	chr1:153521554-153522154@chr1:153521554-153522154@chr1:153521561-153522150@chr1:153521561-153522150@chr1:153521617-153522078@chr1:153521617-153522078@chr1:153521658-153522096@chr1:153521658-153522096@chr1:153521666-153522129@chr1:153521666-153522129@chr1:153521672-153522099@chr1:153521672-153522099@chr1:153521674-153522055@chr1:153521674-153522055@chr1:153521676-153522036@chr1:153521676-153522036…	Cardiovascular@Cardiovascular@Cardiovascular@Cardiovascular@Cardiovascular@Cardiovascular@Cardiovascular@Cardiovascular@Others@Others@Cardiovascular@Cardiovascular@Cardiovascular@Cardiovascular@Lung@Lung@Cardiovascular@Cardiovascular@Cardiovascular@Cardiovascular@Cardiovascular@Cardiovascular@Cardiovascular@Cardiovascular@Cardiovascular@Cardiovascular@Cardiovascular@Cardiovascular@Cardiovascular@…	SRX2207673@SRX2207673@SRX2207672@SRX2207672@SRX4947721@SRX4947721@SRX7054661@SRX7054661@SRX5938177@SRX5938177@SRX7054666@SRX7054666@SRX7054670@SRX7054670@SRX1672130@SRX1672130@SRX7054619@SRX7054619@SRX7054617@SRX7054617@SRX112016@SRX112016@SRX4947720@SRX4947720@SRX2355085@SRX2355085@SRX7054623@SRX7054623@SRX7054614@SRX7054614@SRX7054665@SRX7054665@SRX7054610@SRX7054610@SRX7054616@SRX7054616@SRX24…
FALSE	chr22	43010068	43012068	POLDIP3	143	chr22:43010453-43010704@chr22:43010682-43011769@chr22:43010720-43010986@chr22:43010737-43011058@chr22:43010747-43011794@chr22:43010748-43010931@chr22:43010752-43011065@chr22:43010774-43011687@chr22:43010784-43011011@chr22:43010793-43011021@chr22:43010796-43011697@chr22:43010799-43010984@chr22:43010799-43011027@chr22:43010804-43011750@chr22:43010811-43011051@chr22:43010833-43011711@chr22:43010852-…	Blood@Cardiovascular@Kidney@Cardiovascular@Cardiovascular@Cardiovascular@Cardiovascular@Digestive%20tract@Cardiovascular@Cardiovascular@Cardiovascular@Cardiovascular@Cardiovascular@Cardiovascular@Cardiovascular@Cardiovascular@Others@Blood@Cardiovascular@Cardiovascular@Cardiovascular@Blood@Cardiovascular@Cardiovascular@Blood@Blood@Lung@Blood@Blood@Blood@Cardiovascular@Cardiovascular@Cardiovascular…	SRX017911@SRX7054614@SRX2055843@SRX7054668@SRX7054661@SRX7054611@SRX7054666@SRX359916@SRX7054622@SRX7054670@SRX7054616@SRX7054617@SRX7054671@SRX2355079@SRX7055004@SRX2207672@SRX5938177@SRX150605@SRX2207673@SRX2355078@SRX2355085@SRX1460848@SRX7054621@SRX2355081@SRX150359@SRX150557@SRX1672130@SRX017906@SRX017865@SRX150362@SRX7054665@SRX7055008@SRX425263@SRX7054666@SRX2837382@SRX1672133@SRX7054611@S…
TRUE	chr2	37617612	37617862	QPCT	142	chr2:37617222-37618129@chr2:37617226-37617994@chr2:37617227-37618131@chr2:37617262-37618113@chr2:37617277-37618060@chr2:37617327-37618072@chr2:37617342-37618029@chr2:37617351-37618044@chr2:37617388-37617977@chr2:37617400-37618063@chr2:37617427-37618064@chr2:37617439-37618077@chr2:37617444-37618036@chr2:37617456-37618041@chr2:37617465-37618057@chr2:37617470-37618035@chr2:37617473-37618034@chr2:376…	Cardiovascular@Blood@Cardiovascular@Others@Others@Others@Cardiovascular@Others@Lung@Others@Others@Cardiovascular@Cardiovascular@Cardiovascular@Others@Others@Others@Cardiovascular@Cardiovascular@Cardiovascular@Blood@Blood@Cardiovascular@Cardiovascular@Blood@Others@Lung@Blood@Cardiovascular@Blood@Others@Cardiovascular@Cardiovascular@Kidney@Cardiovascular@Cardiovascular@Kidney@Cardiovascular@Cardiov…	SRX2207672@SRX150605@SRX2207673@SRX2404140@SRX5938177@SRX2404136@SRX7055007@SRX2404137@SRX1672133@SRX2404135@SRX2404139@SRX7054661@SRX7054666@SRX7054614@SRX2404132@SRX2404142@SRX2404141@SRX7054617@SRX7054616@SRX7055006@SRX150610@SRX017912@SRX7054662@SRX7054664@SRX4401063@SRX2404134@SRX1672130@SRX150608@SRX7054619@SRX017913@SRX2404133@SRX7054671@SRX7054622@SRX3636885@SRX425263@SRX7054657@SRX205584…
TRUE	chr1	36615207	36615457	COL8A2	140	chr1:36614746-36615505@chr1:36614986-36615317@chr1:36614995-36615595@chr1:36614997-36615480@chr1:36615005-36615605@chr1:36615005-36615617@chr1:36615014-36615490@chr1:36615018-36615420@chr1:36615020-36615577@chr1:36615021-36615619@chr1:36615027-36615654@chr1:36615032-36615607@chr1:36615036-36615652@chr1:36615038-36615572@chr1:36615038-36615632@chr1:36615046-36615557@chr1:36615046-36615591@chr1:366…	Digestive%20tract@Uterus@Cardiovascular@Liver@Cardiovascular@Cardiovascular@Uterus@Blood@Cardiovascular@Cardiovascular@Cardiovascular@Cardiovascular@Cardiovascular@Cardiovascular@Cardiovascular@Cardiovascular@Cardiovascular@Cardiovascular@Blood@Cardiovascular@Cardiovascular@Blood@Cardiovascular@Cardiovascular@Cardiovascular@Cardiovascular@Cardiovascular@Cardiovascular@Blood@Cardiovascular@Cardiov…	SRX359916@SRX378804@SRX7054611@SRX2270129@SRX7054614@SRX7054665@SRX378805@SRX1460848@SRX7054616@SRX7054671@SRX7054661@SRX7054662@SRX2207672@SRX7054621@SRX7054666@SRX2355078@SRX2355085@SRX4947721@SRX4401064@SRX7054622@SRX7054670@SRX2837382@SRX7055008@SRX7054667@SRX7054669@SRX2355079@SRX7054668@SRX7054615@SRX4401061@SRX2355081@SRX7054619@SRX747783@SRX7054664@SRX7055006@SRX7055004@SRX2055843@SRX1460…
TRUE	chr11	12101707	12101957	DKK3	134	chr11:12101579-12102075@chr11:12101579-12102075@chr11:12101601-12102093@chr11:12101601-12102093@chr11:12101602-12102019@chr11:12101602-12102019@chr11:12101603-12102076@chr11:12101603-12102076@chr11:12101603-12102085@chr11:12101603-12102085@chr11:12101612-12102073@chr11:12101612-12102073@chr11:12101623-12102078@chr11:12101623-12102078@chr11:12101624-12102054@chr11:12101624-12102054@chr11:12101626-…	Others@Others@Cardiovascular@Cardiovascular@Cardiovascular@Cardiovascular@Cardiovascular@Cardiovascular@Cardiovascular@Cardiovascular@Cardiovascular@Cardiovascular@Cardiovascular@Cardiovascular@Cardiovascular@Cardiovascular@Cardiovascular@Cardiovascular@Cardiovascular@Cardiovascular@Cardiovascular@Cardiovascular@Cardiovascular@Cardiovascular@Cardiovascular@Cardiovascular@Cardiovascular@Cardiovasc…	SRX5938177@SRX5938177@SRX2207672@SRX2207672@SRX7054657@SRX7054657@SRX2207673@SRX2207673@SRX7055006@SRX7055006@SRX7054661@SRX7054661@SRX7054617@SRX7054617@SRX7054671@SRX7054671@SRX7054611@SRX7054611@SRX7054662@SRX7054662@SRX7054618@SRX7054618@SRX7054666@SRX7054666@SRX7054609@SRX7054609@SRX7055004@SRX7055004@SRX7054619@SRX7054619@SRX425264@SRX425264@SRX7054615@SRX7054615@SRX7055007@SRX7055007@SRX70…
TRUE	chr11	12101707	12101957	MICAL2	134	chr11:12101579-12102075@chr11:12101579-12102075@chr11:12101601-12102093@chr11:12101601-12102093@chr11:12101602-12102019@chr11:12101602-12102019@chr11:12101603-12102076@chr11:12101603-12102076@chr11:12101603-12102085@chr11:12101603-12102085@chr11:12101612-12102073@chr11:12101612-12102073@chr11:12101623-12102078@chr11:12101623-12102078@chr11:12101624-12102054@chr11:12101624-12102054@chr11:12101626-…	Others@Others@Cardiovascular@Cardiovascular@Cardiovascular@Cardiovascular@Cardiovascular@Cardiovascular@Cardiovascular@Cardiovascular@Cardiovascular@Cardiovascular@Cardiovascular@Cardiovascular@Cardiovascular@Cardiovascular@Cardiovascular@Cardiovascular@Cardiovascular@Cardiovascular@Cardiovascular@Cardiovascular@Cardiovascular@Cardiovascular@Cardiovascular@Cardiovascular@Cardiovascular@Cardiovasc…	SRX5938177@SRX5938177@SRX2207672@SRX2207672@SRX7054657@SRX7054657@SRX2207673@SRX2207673@SRX7055006@SRX7055006@SRX7054661@SRX7054661@SRX7054617@SRX7054617@SRX7054671@SRX7054671@SRX7054611@SRX7054611@SRX7054662@SRX7054662@SRX7054618@SRX7054618@SRX7054666@SRX7054666@SRX7054609@SRX7054609@SRX7055004@SRX7055004@SRX7054619@SRX7054619@SRX425264@SRX425264@SRX7054615@SRX7054615@SRX7055007@SRX7055007@SRX70…
TRUE	chr5	150460531	150460781	ANXA6	133	chr5:150460247-150460914@chr5:150460387-150460706@chr5:150460394-150460926@chr5:150460404-150460829@chr5:150460410-150460821@chr5:150460418-150460892@chr5:150460435-150460951@chr5:150460437-150460868@chr5:150460439-150460877@chr5:150460448-150460952@chr5:150460451-150460842@chr5:150460460-150460850@chr5:150460461-150460856@chr5:150460464-150460719@chr5:150460464-150460812@chr5:150460465-150460947…	Kidney@Blood@Kidney@Cardiovascular@Blood@Kidney@Cardiovascular@Cardiovascular@Cardiovascular@Cardiovascular@Blood@Cardiovascular@Liver@Breast@Blood@Cardiovascular@Cardiovascular@Cardiovascular@Cardiovascular@Cardiovascular@Cardiovascular@Cardiovascular@Cardiovascular@Cardiovascular@Blood@Cardiovascular@Cardiovascular@Cardiovascular@Cardiovascular@Cardiovascular@Cardiovascular@Cardiovascular@Cardi…	SRX3346352@SRX4001967@SRX2055843@SRX425263@SRX017911@SRX3636885@SRX7054666@SRX2355079@SRX7054671@SRX7054661@SRX2837382@SRX7054670@SRX2270129@SRX968978@SRX150605@SRX7054614@SRX2355083@SRX2355085@SRX7054619@SRX2207671@SRX7055007@SRX2355077@SRX2207673@SRX7055006@SRX017876@SRX425264@SRX7054621@SRX7055008@SRX7054618@SRX7054665@SRX7054611@SRX7054622@SRX7054668@SRX294971@SRX1885200@SRX7054612@SRX2207672…
TRUE	chr17	80169604	80171604	CCDC57	131	chr17:80170144-80170788@chr17:80170328-80170740@chr17:80170368-80170734@chr17:80170371-80170966@chr17:80170380-80170833@chr17:80170391-80170832@chr17:80170394-80170910@chr17:80170398-80170749@chr17:80170404-80170821@chr17:80170414-80170750@chr17:80170419-80170778@chr17:80170423-80170738@chr17:80170430-80170691@chr17:80170434-80170765@chr17:80170435-80170720@chr17:80170440-80170715@chr17:80170441-…	Cardiovascular@Cardiovascular@Cardiovascular@Kidney@Cardiovascular@Cardiovascular@Blood@Cardiovascular@Cardiovascular@Cardiovascular@Kidney@Blood@Cardiovascular@Cardiovascular@Cardiovascular@Cardiovascular@Cardiovascular@Cardiovascular@Cardiovascular@Cardiovascular@Cardiovascular@Cardiovascular@Cardiovascular@Cardiovascular@Cardiovascular@Cardiovascular@Cardiovascular@Blood@Cardiovascular@Blood@C…	SRX7054614@SRX2355079@SRX2355083@SRX3346352@SRX2207672@SRX2207673@SRX017911@SRX4947721@SRX2355085@SRX425263@SRX2055843@SRX2837382@SRX7054662@SRX7054664@SRX7054657@SRX7054663@SRX7055007@SRX4947720@SRX112016@SRX7054666@SRX7054661@SRX7055004@SRX7054619@SRX425264@SRX7055006@SRX7054615@SRX7054671@SRX150605@SRX294971@SRX1460847@SRX2355081@SRX7054621@SRX7055008@SRX2207671@SRX7054670@SRX7054620@SRX705461…
FALSE	chr4	185609700	185609950	CASP3	130	chr4:185609357-185609876@chr4:185609357-185609876@chr4:185609373-185609951@chr4:185609373-185609951@chr4:185609374-185609986@chr4:185609374-185609986@chr4:185609375-185609949@chr4:185609375-185609949@chr4:185609380-185609970@chr4:185609380-185609970@chr4:185609383-185609977@chr4:185609383-185609977@chr4:185609385-185609983@chr4:185609385-185609983@chr4:185609392-185609863@chr4:185609392-185609863…	Others@Others@Others@Others@Cardiovascular@Cardiovascular@Cardiovascular@Cardiovascular@Cardiovascular@Cardiovascular@Cardiovascular@Cardiovascular@Cardiovascular@Cardiovascular@Others@Others@Cardiovascular@Cardiovascular@Breast@Breast@Cardiovascular@Cardiovascular@Others@Others@Cardiovascular@Cardiovascular@Cardiovascular@Cardiovascular@Others@Others@Cardiovascular@Cardiovascular@Others@Others@O…	SRX2404136@SRX2404136@SRX2404140@SRX2404140@SRX2207673@SRX2207673@SRX7054618@SRX7054618@SRX7054617@SRX7054617@SRX2207672@SRX2207672@SRX7054666@SRX7054666@SRX2404133@SRX2404133@SRX7054670@SRX7054670@SRX1100313@SRX1100313@SRX7055007@SRX7055007@SRX5938177@SRX5938177@SRX7054661@SRX7054661@SRX7054664@SRX7054664@SRX2404142@SRX2404142@SRX7054614@SRX7054614@SRX2404132@SRX2404132@SRX2404135@SRX2404135@SRX…
FALSE	chr4	185609700	185609950	PRIMPOL	130	chr4:185609357-185609876@chr4:185609357-185609876@chr4:185609373-185609951@chr4:185609373-185609951@chr4:185609374-185609986@chr4:185609374-185609986@chr4:185609375-185609949@chr4:185609375-185609949@chr4:185609380-185609970@chr4:185609380-185609970@chr4:185609383-185609977@chr4:185609383-185609977@chr4:185609385-185609983@chr4:185609385-185609983@chr4:185609392-185609863@chr4:185609392-185609863…	Others@Others@Others@Others@Cardiovascular@Cardiovascular@Cardiovascular@Cardiovascular@Cardiovascular@Cardiovascular@Cardiovascular@Cardiovascular@Cardiovascular@Cardiovascular@Others@Others@Cardiovascular@Cardiovascular@Breast@Breast@Cardiovascular@Cardiovascular@Others@Others@Cardiovascular@Cardiovascular@Cardiovascular@Cardiovascular@Others@Others@Cardiovascular@Cardiovascular@Others@Others@O…	SRX2404136@SRX2404136@SRX2404140@SRX2404140@SRX2207673@SRX2207673@SRX7054618@SRX7054618@SRX7054617@SRX7054617@SRX2207672@SRX2207672@SRX7054666@SRX7054666@SRX2404133@SRX2404133@SRX7054670@SRX7054670@SRX1100313@SRX1100313@SRX7055007@SRX7055007@SRX5938177@SRX5938177@SRX7054661@SRX7054661@SRX7054664@SRX7054664@SRX2404142@SRX2404142@SRX7054614@SRX7054614@SRX2404132@SRX2404132@SRX2404135@SRX2404135@SRX…
TRUE	chr12	57560914	57561164	NDUFA4L2	128	chr12:57560794-57561234@chr12:57560794-57561234@chr12:57560809-57561241@chr12:57560809-57561241@chr12:57560814-57561285@chr12:57560814-57561285@chr12:57560815-57561221@chr12:57560815-57561221@chr12:57560828-57561215@chr12:57560828-57561215@chr12:57560828-57561263@chr12:57560828-57561263@chr12:57560834-57561236@chr12:57560834-57561236@chr12:57560838-57561219@chr12:57560838-57561219@chr12:57560838-…	Cardiovascular@Cardiovascular@Cardiovascular@Cardiovascular@Others@Others@Cardiovascular@Cardiovascular@Cardiovascular@Cardiovascular@Cardiovascular@Cardiovascular@Cardiovascular@Cardiovascular@Cardiovascular@Cardiovascular@Cardiovascular@Cardiovascular@Cardiovascular@Cardiovascular@Cardiovascular@Cardiovascular@Breast@Breast@Cardiovascular@Cardiovascular@Others@Others@Cardiovascular@Cardiovascul…	SRX7054619@SRX7054619@SRX2207672@SRX2207672@SRX5938177@SRX5938177@SRX7055006@SRX7055006@SRX7054666@SRX7054666@SRX2207673@SRX2207673@SRX7054661@SRX7054661@SRX7054617@SRX7054617@SRX7054614@SRX7054614@SRX7054616@SRX7054616@SRX7054611@SRX7054611@SRX1100313@SRX1100313@SRX7054662@SRX7054662@SRX2404134@SRX2404134@SRX7054623@SRX7054623@SRX7054624@SRX7054624@SRX7055007@SRX7055007@SRX7054615@SRX7054615@SRX…
TRUE	chr1	109740022	109740272	CELSR2	128	chr1:109739815-109740443@chr1:109739815-109740443@chr1:109739825-109740313@chr1:109739825-109740313@chr1:109739826-109740344@chr1:109739826-109740344@chr1:109739828-109740422@chr1:109739828-109740422@chr1:109739829-109740338@chr1:109739829-109740338@chr1:109739832-109740375@chr1:109739832-109740375@chr1:109739836-109740430@chr1:109739836-109740430@chr1:109739837-109740326@chr1:109739837-109740326…	Others@Others@Cardiovascular@Cardiovascular@Cardiovascular@Cardiovascular@Cardiovascular@Cardiovascular@Cardiovascular@Cardiovascular@Cardiovascular@Cardiovascular@Cardiovascular@Cardiovascular@Cardiovascular@Cardiovascular@Cardiovascular@Cardiovascular@Cardiovascular@Cardiovascular@Cardiovascular@Cardiovascular@Cardiovascular@Cardiovascular@Cardiovascular@Cardiovascular@Cardiovascular@Cardiovasc…	SRX5938177@SRX5938177@SRX7054672@SRX7054672@SRX7054657@SRX7054657@SRX2207672@SRX2207672@SRX7054671@SRX7054671@SRX7055007@SRX7055007@SRX2207673@SRX2207673@SRX7054611@SRX7054611@SRX7054617@SRX7054617@SRX7054615@SRX7054615@SRX7054621@SRX7054621@SRX7054661@SRX7054661@SRX7055004@SRX7055004@SRX7054614@SRX7054614@SRX7054666@SRX7054666@SRX7054618@SRX7054618@SRX7054664@SRX7054664@SRX2355079@SRX2355079@SRX…
TRUE	chr22	38572226	38572476	PLA2G6	128	chr22:38572145-38572685@chr22:38572145-38572685@chr22:38572154-38572566@chr22:38572154-38572566@chr22:38572155-38572576@chr22:38572155-38572576@chr22:38572155-38572601@chr22:38572155-38572601@chr22:38572158-38572580@chr22:38572158-38572580@chr22:38572158-38572626@chr22:38572158-38572626@chr22:38572160-38572678@chr22:38572160-38572678@chr22:38572164-38572599@chr22:38572164-38572599@chr22:38572169-…	Cardiovascular@Cardiovascular@Cardiovascular@Cardiovascular@Cardiovascular@Cardiovascular@Cardiovascular@Cardiovascular@Cardiovascular@Cardiovascular@Cardiovascular@Cardiovascular@Cardiovascular@Cardiovascular@Cardiovascular@Cardiovascular@Cardiovascular@Cardiovascular@Cardiovascular@Cardiovascular@Cardiovascular@Cardiovascular@Cardiovascular@Cardiovascular@Cardiovascular@Cardiovascular@Cardiovas…	SRX2207673@SRX2207673@SRX7054666@SRX7054666@SRX7054665@SRX7054665@SRX7054661@SRX7054661@SRX7054614@SRX7054614@SRX7054671@SRX7054671@SRX2207672@SRX2207672@SRX7054611@SRX7054611@SRX7055008@SRX7055008@SRX7054615@SRX7054615@SRX7054616@SRX7054616@SRX7054622@SRX7054622@SRX7054617@SRX7054617@SRX7054662@SRX7054662@SRX7054668@SRX7054668@SRX7054609@SRX7054609@SRX7055007@SRX7055007@SRX7054670@SRX7054670@SRX…
TRUE	chr12	57560914	57561164	NAB2	128	chr12:57560794-57561234@chr12:57560794-57561234@chr12:57560809-57561241@chr12:57560809-57561241@chr12:57560814-57561285@chr12:57560814-57561285@chr12:57560815-57561221@chr12:57560815-57561221@chr12:57560828-57561215@chr12:57560828-57561215@chr12:57560828-57561263@chr12:57560828-57561263@chr12:57560834-57561236@chr12:57560834-57561236@chr12:57560838-57561219@chr12:57560838-57561219@chr12:57560838-…	Cardiovascular@Cardiovascular@Cardiovascular@Cardiovascular@Others@Others@Cardiovascular@Cardiovascular@Cardiovascular@Cardiovascular@Cardiovascular@Cardiovascular@Cardiovascular@Cardiovascular@Cardiovascular@Cardiovascular@Cardiovascular@Cardiovascular@Cardiovascular@Cardiovascular@Cardiovascular@Cardiovascular@Breast@Breast@Cardiovascular@Cardiovascular@Others@Others@Cardiovascular@Cardiovascul…	SRX7054619@SRX7054619@SRX2207672@SRX2207672@SRX5938177@SRX5938177@SRX7055006@SRX7055006@SRX7054666@SRX7054666@SRX2207673@SRX2207673@SRX7054661@SRX7054661@SRX7054617@SRX7054617@SRX7054614@SRX7054614@SRX7054616@SRX7054616@SRX7054611@SRX7054611@SRX1100313@SRX1100313@SRX7054662@SRX7054662@SRX2404134@SRX2404134@SRX7054623@SRX7054623@SRX7054624@SRX7054624@SRX7055007@SRX7055007@SRX7054615@SRX7054615@SRX…
TRUE	chr1	109740022	109740272	PSRC1	128	chr1:109739815-109740443@chr1:109739815-109740443@chr1:109739825-109740313@chr1:109739825-109740313@chr1:109739826-109740344@chr1:109739826-109740344@chr1:109739828-109740422@chr1:109739828-109740422@chr1:109739829-109740338@chr1:109739829-109740338@chr1:109739832-109740375@chr1:109739832-109740375@chr1:109739836-109740430@chr1:109739836-109740430@chr1:109739837-109740326@chr1:109739837-109740326…	Others@Others@Cardiovascular@Cardiovascular@Cardiovascular@Cardiovascular@Cardiovascular@Cardiovascular@Cardiovascular@Cardiovascular@Cardiovascular@Cardiovascular@Cardiovascular@Cardiovascular@Cardiovascular@Cardiovascular@Cardiovascular@Cardiovascular@Cardiovascular@Cardiovascular@Cardiovascular@Cardiovascular@Cardiovascular@Cardiovascular@Cardiovascular@Cardiovascular@Cardiovascular@Cardiovasc…	SRX5938177@SRX5938177@SRX7054672@SRX7054672@SRX7054657@SRX7054657@SRX2207672@SRX2207672@SRX7054671@SRX7054671@SRX7055007@SRX7055007@SRX2207673@SRX2207673@SRX7054611@SRX7054611@SRX7054617@SRX7054617@SRX7054615@SRX7054615@SRX7054621@SRX7054621@SRX7054661@SRX7054661@SRX7055004@SRX7055004@SRX7054614@SRX7054614@SRX7054666@SRX7054666@SRX7054618@SRX7054618@SRX7054664@SRX7054664@SRX2355079@SRX2355079@SRX…
TRUE	chr22	38572226	38572476	MAFF	128	chr22:38572145-38572685@chr22:38572145-38572685@chr22:38572154-38572566@chr22:38572154-38572566@chr22:38572155-38572576@chr22:38572155-38572576@chr22:38572155-38572601@chr22:38572155-38572601@chr22:38572158-38572580@chr22:38572158-38572580@chr22:38572158-38572626@chr22:38572158-38572626@chr22:38572160-38572678@chr22:38572160-38572678@chr22:38572164-38572599@chr22:38572164-38572599@chr22:38572169-…	Cardiovascular@Cardiovascular@Cardiovascular@Cardiovascular@Cardiovascular@Cardiovascular@Cardiovascular@Cardiovascular@Cardiovascular@Cardiovascular@Cardiovascular@Cardiovascular@Cardiovascular@Cardiovascular@Cardiovascular@Cardiovascular@Cardiovascular@Cardiovascular@Cardiovascular@Cardiovascular@Cardiovascular@Cardiovascular@Cardiovascular@Cardiovascular@Cardiovascular@Cardiovascular@Cardiovas…	SRX2207673@SRX2207673@SRX7054666@SRX7054666@SRX7054665@SRX7054665@SRX7054661@SRX7054661@SRX7054614@SRX7054614@SRX7054671@SRX7054671@SRX2207672@SRX2207672@SRX7054611@SRX7054611@SRX7055008@SRX7055008@SRX7054615@SRX7054615@SRX7054616@SRX7054616@SRX7054622@SRX7054622@SRX7054617@SRX7054617@SRX7054662@SRX7054662@SRX7054668@SRX7054668@SRX7054609@SRX7054609@SRX7055007@SRX7055007@SRX7054670@SRX7054670@SRX…
TRUE	chr3	10240759	10241009	IRAK2	124	chr3:10240443-10241213@chr3:10240451-10241218@chr3:10240653-10241159@chr3:10240665-10241112@chr3:10240666-10241141@chr3:10240670-10241134@chr3:10240680-10241166@chr3:10240682-10241165@chr3:10240685-10241137@chr3:10240686-10241165@chr3:10240686-10241200@chr3:10240687-10241131@chr3:10240687-10241149@chr3:10240688-10241113@chr3:10240689-10241157@chr3:10240691-10241133@chr3:10240696-10241174@chr3:102…	Cardiovascular@Cardiovascular@Cardiovascular@Cardiovascular@Cardiovascular@Cardiovascular@Cardiovascular@Cardiovascular@Cardiovascular@Cardiovascular@Cardiovascular@Cardiovascular@Cardiovascular@Cardiovascular@Cardiovascular@Cardiovascular@Cardiovascular@Cardiovascular@Kidney@Cardiovascular@Others@Cardiovascular@Cardiovascular@Cardiovascular@Cardiovascular@Cardiovascular@Others@Others@Cardiovascu…	SRX2207673@SRX2207672@SRX425264@SRX7054665@SRX7054671@SRX7054622@SRX7054666@SRX7055007@SRX7054617@SRX7054670@SRX7054661@SRX7054611@SRX7054621@SRX7054669@SRX7054657@SRX7054615@SRX7055006@SRX7054619@SRX3636885@SRX7054614@SRX5938177@SRX7054668@SRX7054664@SRX7054618@SRX7054616@SRX425263@SRX2404141@SRX2404142@SRX7055004@SRX2355079@SRX2404135@SRX7055008@SRX7054663@SRX2355085@SRX7054667@SRX7054623@SRX70…
FALSE	chr20	62288712	62290712	RTEL1	124	chr20:62288818-62289020@chr20:62288818-62289020@chr20:62288844-62289143@chr20:62288844-62289143@chr20:62288905-62289185@chr20:62288905-62289185@chr20:62289452-62290292@chr20:62289452-62290292@chr20:62289497-62289822@chr20:62289497-62289822@chr20:62289507-62289951@chr20:62289507-62289951@chr20:62289515-62289696@chr20:62289515-62289696@chr20:62289516-62290054@chr20:62289516-62290054@chr20:62289523-…	Breast@Breast@Breast@Breast@Breast@Breast@Digestive%20tract@Digestive%20tract@Blood@Blood@Kidney@Kidney@Blood@Blood@Kidney@Kidney@Liver@Liver@Cardiovascular@Cardiovascular@Cardiovascular@Cardiovascular@Blood@Blood@Cardiovascular@Cardiovascular@Cardiovascular@Cardiovascular@Blood@Blood@Blood@Blood@Cardiovascular@Cardiovascular@Blood@Blood@Blood@Blood@Blood@Blood@Blood@Blood@Cardiovascular@Cardiova…	SRX968976@SRX968976@SRX968972@SRX968972@SRX968974@SRX968974@SRX359916@SRX359916@SRX150557@SRX150557@SRX3636885@SRX3636885@SRX017906@SRX017906@SRX2055843@SRX2055843@SRX2270129@SRX2270129@SRX2207673@SRX2207673@SRX7054661@SRX7054661@SRX017912@SRX017912@SRX7054667@SRX7054667@SRX2207672@SRX2207672@SRX150605@SRX150605@SRX150610@SRX150610@SRX7054615@SRX7054615@SRX150353@SRX150353@SRX150608@SRX150608@SRX…
FALSE	chr20	62288712	62290712	RTEL1-TNFRSF6B	124	chr20:62288818-62289020@chr20:62288818-62289020@chr20:62288844-62289143@chr20:62288844-62289143@chr20:62288905-62289185@chr20:62288905-62289185@chr20:62289452-62290292@chr20:62289452-62290292@chr20:62289497-62289822@chr20:62289497-62289822@chr20:62289507-62289951@chr20:62289507-62289951@chr20:62289515-62289696@chr20:62289515-62289696@chr20:62289516-62290054@chr20:62289516-62290054@chr20:62289523-…	Breast@Breast@Breast@Breast@Breast@Breast@Digestive%20tract@Digestive%20tract@Blood@Blood@Kidney@Kidney@Blood@Blood@Kidney@Kidney@Liver@Liver@Cardiovascular@Cardiovascular@Cardiovascular@Cardiovascular@Blood@Blood@Cardiovascular@Cardiovascular@Cardiovascular@Cardiovascular@Blood@Blood@Blood@Blood@Cardiovascular@Cardiovascular@Blood@Blood@Blood@Blood@Blood@Blood@Blood@Blood@Cardiovascular@Cardiova…	SRX968976@SRX968976@SRX968972@SRX968972@SRX968974@SRX968974@SRX359916@SRX359916@SRX150557@SRX150557@SRX3636885@SRX3636885@SRX017906@SRX017906@SRX2055843@SRX2055843@SRX2270129@SRX2270129@SRX2207673@SRX2207673@SRX7054661@SRX7054661@SRX017912@SRX017912@SRX7054667@SRX7054667@SRX2207672@SRX2207672@SRX150605@SRX150605@SRX150610@SRX150610@SRX7054615@SRX7054615@SRX150353@SRX150353@SRX150608@SRX150608@SRX…
TRUE	chr1	220906434	220906684	C1orf115	123	chr1:220906324-220906757@chr1:220906356-220906781@chr1:220906360-220906777@chr1:220906368-220906773@chr1:220906375-220906770@chr1:220906375-220906798@chr1:220906376-220906804@chr1:220906377-220906753@chr1:220906378-220906927@chr1:220906379-220906760@chr1:220906388-220906699@chr1:220906390-220906737@chr1:220906391-220906761@chr1:220906391-220906802@chr1:220906393-220906820@chr1:220906394-220906911…	Cardiovascular@Cardiovascular@Cardiovascular@Cardiovascular@Cardiovascular@Cardiovascular@Cardiovascular@Cardiovascular@Kidney@Cardiovascular@Cardiovascular@Cardiovascular@Cardiovascular@Cardiovascular@Cardiovascular@Cardiovascular@Others@Cardiovascular@Cardiovascular@Cardiovascular@Cardiovascular@Cardiovascular@Cardiovascular@Cardiovascular@Cardiovascular@Cardiovascular@Cardiovascular@Cardiovasc…	SRX7055006@SRX7054615@SRX7055007@SRX7054661@SRX7054621@SRX7054617@SRX7054666@SRX7054671@SRX2055843@SRX7054616@SRX7054609@SRX7055005@SRX7054618@SRX7054614@SRX2355079@SRX2207673@SRX2404140@SRX7054669@SRX7054668@SRX7054670@SRX7054667@SRX7054622@SRX2207672@SRX7054662@SRX7054663@SRX7054619@SRX7054620@SRX7055008@SRX5938177@SRX4001967@SRX7054611@SRX7054657@SRX7055004@SRX7054664@SRX425263@SRX7054613@SRX4…
TRUE	chr1	223914344	223914594	CAPN2	123	chr1:223914154-223914727@chr1:223914169-223914635@chr1:223914221-223914712@chr1:223914225-223914765@chr1:223914227-223914722@chr1:223914230-223914793@chr1:223914251-223914712@chr1:223914254-223914764@chr1:223914259-223914733@chr1:223914271-223914746@chr1:223914289-223914707@chr1:223914290-223914707@chr1:223914291-223914701@chr1:223914293-223914714@chr1:223914294-223914647@chr1:223914299-223914685…	Kidney@Blood@Blood@Cardiovascular@Kidney@Others@Blood@Cardiovascular@Others@Others@Blood@Others@Others@Kidney@Breast@Blood@Cardiovascular@Others@Cardiovascular@Cardiovascular@Cardiovascular@Cardiovascular@Blood@Others@Blood@Cardiovascular@Cardiovascular@Cardiovascular@Cardiovascular@Cardiovascular@Others@Others@Cardiovascular@Cardiovascular@Uterus@Cardiovascular@Cardiovascular@Others@Cardiovascul…	SRX2055843@SRX4401064@SRX2837382@SRX2207673@SRX3636885@SRX5938177@SRX150605@SRX2207672@SRX2404140@SRX2404136@SRX017911@SRX2404135@SRX2404141@SRX3346352@SRX1100313@SRX4001967@SRX2355083@SRX2404137@SRX7054615@SRX7054611@SRX425263@SRX7054617@SRX150610@SRX2404134@SRX150353@SRX7055007@SRX7054661@SRX7054666@SRX7054616@SRX2355079@SRX2404133@SRX2404139@SRX7054663@SRX7054670@SRX027912@SRX7055006@SRX705461…
TRUE	chr11	72524100	72526100	ATG16L2	123	chr11:72524243-72524514@chr11:72524259-72524496@chr11:72524920-72525660@chr11:72524921-72525165@chr11:72524930-72525570@chr11:72524932-72525244@chr11:72524937-72525555@chr11:72524938-72525155@chr11:72524944-72525002@chr11:72524970-72525474@chr11:72524974-72525481@chr11:72524978-72525407@chr11:72524981-72525460@chr11:72524982-72525544@chr11:72524983-72525523@chr11:72524989-72525420@chr11:72524989-…	Adipocyte@Adipocyte@Kidney@Bone@Cardiovascular@Bone@Cardiovascular@Bone@Breast@Cardiovascular@Cardiovascular@Others@Cardiovascular@Others@Cardiovascular@Breast@Others@Cardiovascular@Blood@Blood@Digestive%20tract@Kidney@Cardiovascular@Cardiovascular@Cardiovascular@Others@Bone@Blood@Cardiovascular@Blood@Blood@Cardiovascular@Cardiovascular@Cardiovascular@Cardiovascular@Cardiovascular@Cardiovascular@…	SRX813772@SRX813773@SRX2055843@SRX3638908@SRX2207673@SRX3638909@SRX2207672@SRX3638907@ERX348280@SRX7054661@SRX7054666@SRX2404137@SRX7054611@SRX2404140@SRX2355085@SRX968976@SRX2404134@SRX425263@SRX150365@SRX2837382@SRX359916@SRX3636885@SRX7054657@SRX7054671@SRX2207671@SRX2404132@SRX3638911@SRX150608@SRX425264@SRX150605@SRX150606@SRX2355078@SRX7054618@SRX7054615@SRX7054614@SRX7055007@SRX4947721@SRX…
TRUE	chr5	150473632	150473882	ANXA6	119	chr5:150472998-150473981@chr5:150473016-150473970@chr5:150473081-150474436@chr5:150473101-150473931@chr5:150473104-150473890@chr5:150473125-150473989@chr5:150473232-150474400@chr5:150473546-150473935@chr5:150473574-150474423@chr5:150473576-150473974@chr5:150473579-150474009@chr5:150473582-150473943@chr5:150473588-150473894@chr5:150473596-150473902@chr5:150473599-150473946@chr5:150473602-150473978…	Others@Others@Kidney@Cardiovascular@Cardiovascular@Cardiovascular@Kidney@Cardiovascular@Others@Cardiovascular@Blood@Cardiovascular@Lung@Breast@Cardiovascular@Blood@Blood@Blood@Others@Blood@Kidney@Cardiovascular@Blood@Others@Blood@Blood@Lung@Uterus@Blood@Others@Others@Others@Blood@Blood@Cardiovascular@Uterus@Blood@Blood@Cardiovascular@Cardiovascular@Cardiovascular@Blood@Cardiovascular@Blood@Blood@…	SRX2404136@SRX2404135@SRX3636885@SRX7054661@SRX7054617@SRX2207673@SRX2055843@SRX2355079@SRX2404140@SRX2207672@SRX150605@SRX425264@SRX1672130@SRX1100313@SRX425263@SRX017913@SRX017911@SRX150606@SRX2404134@SRX150353@SRX3346352@SRX7054614@SRX150557@SRX2404142@SRX017912@SRX150610@SRX1672133@SRX4301473@SRX2837382@SRX2404141@SRX2404139@SRX5938177@SRX150365@SRX150362@SRX7054618@SRX027912@SRX017891@SRX017…
TRUE	chr1	156023116	156025116	UBQLN4	119	chr1:156023465-156023966@chr1:156023505-156023748@chr1:156023532-156023801@chr1:156023540-156023749@chr1:156023567-156024175@chr1:156023588-156024100@chr1:156023599-156024094@chr1:156023616-156024177@chr1:156023621-156024154@chr1:156023624-156024183@chr1:156023628-156024174@chr1:156023638-156024070@chr1:156023639-156024127@chr1:156023643-156024075@chr1:156023645-156024191@chr1:156023650-156024158…	Kidney@Cardiovascular@Cardiovascular@Cardiovascular@Cardiovascular@Cardiovascular@Cardiovascular@Cardiovascular@Cardiovascular@Cardiovascular@Cardiovascular@Cardiovascular@Cardiovascular@Liver@Cardiovascular@Cardiovascular@Cardiovascular@Cardiovascular@Blood@Cardiovascular@Cardiovascular@Cardiovascular@Kidney@Blood@Cardiovascular@Cardiovascular@Cardiovascular@Cardiovascular@Cardiovascular@Cardiov…	SRX3346352@SRX2355078@SRX2355085@SRX2355081@SRX7054614@SRX7054664@SRX7054621@SRX7054618@SRX7054671@SRX7054666@SRX7054619@SRX7054622@SRX7055004@SRX2270129@SRX2355083@SRX7055007@SRX7055006@SRX7055008@SRX017911@SRX2207673@SRX2207672@SRX7054661@SRX2055843@SRX150605@SRX7054663@SRX425264@SRX425263@SRX2355079@SRX294971@SRX4947721@SRX2404136@SRX7054670@SRX5938177@SRX017912@SRX1100313@SRX7054662@SRX112016…
TRUE	chr1	209780720	209780970	LAMB3	118	chr1:209780573-209781084@chr1:209780573-209781084@chr1:209780656-209781170@chr1:209780656-209781170@chr1:209780677-209781128@chr1:209780677-209781128@chr1:209780680-209781135@chr1:209780680-209781135@chr1:209780687-209781052@chr1:209780687-209781052@chr1:209780701-209781047@chr1:209780701-209781047@chr1:209780705-209781091@chr1:209780705-209781091@chr1:209780721-209781033@chr1:209780721-209781033…	Kidney@Kidney@Others@Others@Blood@Blood@Cardiovascular@Cardiovascular@Kidney@Kidney@Others@Others@Breast@Breast@Blood@Blood@Blood@Blood@Blood@Blood@Others@Others@Blood@Blood@Cardiovascular@Cardiovascular@Digestive%20tract@Digestive%20tract@Cardiovascular@Cardiovascular@Blood@Blood@Others@Others@Blood@Blood@Cardiovascular@Cardiovascular@Cardiovascular@Cardiovascular@Kidney@Kidney@Blood@Blood@Cardi…	SRX2055843@SRX2055843@SRX5938177@SRX5938177@SRX150605@SRX150605@SRX2207673@SRX2207673@SRX3346352@SRX3346352@SRX2404134@SRX2404134@SRX1100313@SRX1100313@SRX4001967@SRX4001967@SRX150557@SRX150557@SRX017913@SRX017913@SRX2404139@SRX2404139@SRX150362@SRX150362@SRX7054618@SRX7054618@SRX3102571@SRX3102571@SRX2355083@SRX2355083@SRX017906@SRX017906@SRX2404136@SRX2404136@SRX2837382@SRX2837382@SRX2207672@SR…
TRUE	chr1	209780720	209780970	G0S2	118	chr1:209780573-209781084@chr1:209780573-209781084@chr1:209780656-209781170@chr1:209780656-209781170@chr1:209780677-209781128@chr1:209780677-209781128@chr1:209780680-209781135@chr1:209780680-209781135@chr1:209780687-209781052@chr1:209780687-209781052@chr1:209780701-209781047@chr1:209780701-209781047@chr1:209780705-209781091@chr1:209780705-209781091@chr1:209780721-209781033@chr1:209780721-209781033…	Kidney@Kidney@Others@Others@Blood@Blood@Cardiovascular@Cardiovascular@Kidney@Kidney@Others@Others@Breast@Breast@Blood@Blood@Blood@Blood@Blood@Blood@Others@Others@Blood@Blood@Cardiovascular@Cardiovascular@Digestive%20tract@Digestive%20tract@Cardiovascular@Cardiovascular@Blood@Blood@Others@Others@Blood@Blood@Cardiovascular@Cardiovascular@Cardiovascular@Cardiovascular@Kidney@Kidney@Blood@Blood@Cardi…	SRX2055843@SRX2055843@SRX5938177@SRX5938177@SRX150605@SRX150605@SRX2207673@SRX2207673@SRX3346352@SRX3346352@SRX2404134@SRX2404134@SRX1100313@SRX1100313@SRX4001967@SRX4001967@SRX150557@SRX150557@SRX017913@SRX017913@SRX2404139@SRX2404139@SRX150362@SRX150362@SRX7054618@SRX7054618@SRX3102571@SRX3102571@SRX2355083@SRX2355083@SRX017906@SRX017906@SRX2404136@SRX2404136@SRX2837382@SRX2837382@SRX2207672@SR…
FALSE	chr5	176881503	176881753	PDLIM7	116	chr5:176881478-176881825@chr5:176881478-176881825@chr5:176881480-176881815@chr5:176881480-176881815@chr5:176881483-176881691@chr5:176881483-176881691@chr5:176881484-176881801@chr5:176881484-176881801@chr5:176881486-176881782@chr5:176881486-176881782@chr5:176881487-176881780@chr5:176881487-176881780@chr5:176881488-176881798@chr5:176881488-176881798@chr5:176881490-176881714@chr5:176881490-176881714…	Cardiovascular@Cardiovascular@Cardiovascular@Cardiovascular@Blood@Blood@Blood@Blood@Blood@Blood@Cardiovascular@Cardiovascular@Cardiovascular@Cardiovascular@Blood@Blood@Cardiovascular@Cardiovascular@Cardiovascular@Cardiovascular@Cardiovascular@Cardiovascular@Cardiovascular@Cardiovascular@Cardiovascular@Cardiovascular@Cardiovascular@Cardiovascular@Cardiovascular@Cardiovascular@Others@Others@Cardiov…	SRX2207673@SRX2207673@SRX7054661@SRX7054661@SRX150606@SRX150606@SRX2837382@SRX2837382@SRX150605@SRX150605@SRX7054618@SRX7054618@SRX2355085@SRX2355085@SRX017912@SRX017912@SRX7054668@SRX7054668@SRX7055007@SRX7055007@SRX7054614@SRX7054614@SRX7054615@SRX7054615@SRX2355083@SRX2355083@SRX7054657@SRX7054657@SRX7054666@SRX7054666@SRX5938177@SRX5938177@SRX7054658@SRX7054658@SRX7055004@SRX7055004@SRX705461…
FALSE	chr5	176881503	176881753	DBN1	116	chr5:176881478-176881825@chr5:176881478-176881825@chr5:176881480-176881815@chr5:176881480-176881815@chr5:176881483-176881691@chr5:176881483-176881691@chr5:176881484-176881801@chr5:176881484-176881801@chr5:176881486-176881782@chr5:176881486-176881782@chr5:176881487-176881780@chr5:176881487-176881780@chr5:176881488-176881798@chr5:176881488-176881798@chr5:176881490-176881714@chr5:176881490-176881714…	Cardiovascular@Cardiovascular@Cardiovascular@Cardiovascular@Blood@Blood@Blood@Blood@Blood@Blood@Cardiovascular@Cardiovascular@Cardiovascular@Cardiovascular@Blood@Blood@Cardiovascular@Cardiovascular@Cardiovascular@Cardiovascular@Cardiovascular@Cardiovascular@Cardiovascular@Cardiovascular@Cardiovascular@Cardiovascular@Cardiovascular@Cardiovascular@Cardiovascular@Cardiovascular@Others@Others@Cardiov…	SRX2207673@SRX2207673@SRX7054661@SRX7054661@SRX150606@SRX150606@SRX2837382@SRX2837382@SRX150605@SRX150605@SRX7054618@SRX7054618@SRX2355085@SRX2355085@SRX017912@SRX017912@SRX7054668@SRX7054668@SRX7055007@SRX7055007@SRX7054614@SRX7054614@SRX7054615@SRX7054615@SRX2355083@SRX2355083@SRX7054657@SRX7054657@SRX7054666@SRX7054666@SRX5938177@SRX5938177@SRX7054658@SRX7054658@SRX7055004@SRX7055004@SRX705461…
TRUE	chr12	76477163	76479163	NAP1L1	114	chr12:76477526-76477882@chr12:76477527-76477970@chr12:76477550-76477978@chr12:76477559-76477742@chr12:76477561-76478006@chr12:76477570-76477979@chr12:76477573-76477774@chr12:76477573-76477948@chr12:76477575-76477862@chr12:76477577-76477831@chr12:76477578-76477914@chr12:76477584-76477817@chr12:76477584-76477876@chr12:76477586-76477790@chr12:76477589-76477964@chr12:76477590-76477883@chr12:76477592-…	Cardiovascular@Cardiovascular@Cardiovascular@Uterus@Kidney@Kidney@Breast@Cardiovascular@Blood@Cardiovascular@Cardiovascular@Blood@Cardiovascular@Blood@Cardiovascular@Cardiovascular@Cardiovascular@Cardiovascular@Others@Cardiovascular@Cardiovascular@Cardiovascular@Blood@Cardiovascular@Cardiovascular@Cardiovascular@Cardiovascular@Others@Cardiovascular@Breast@Cardiovascular@Prostate@Cardiovascular@Ca…	SRX425264@SRX2207673@SRX2207672@SRX027912@SRX3346352@SRX2055843@SRX1100313@SRX7054661@SRX150605@SRX7054616@SRX7055007@SRX2837382@SRX2355083@SRX017913@SRX7054614@SRX425263@SRX7054621@SRX7054619@SRX2404134@SRX294971@SRX7054666@SRX2207671@SRX017912@SRX4947721@SRX7054670@SRX7054618@SRX7054617@SRX5938177@SRX7054615@SRX968976@SRX7054671@SRX1885171@SRX2355085@SRX7054662@SRX7055008@SRX7054612@SRX2355079@…
TRUE	chr11	12038860	12039110	DKK3	108	chr11:12038669-12039110@chr11:12038669-12039110@chr11:12038697-12039229@chr11:12038697-12039229@chr11:12038702-12039159@chr11:12038702-12039159@chr11:12038711-12039163@chr11:12038711-12039163@chr11:12038716-12039106@chr11:12038716-12039106@chr11:12038717-12039109@chr11:12038717-12039109@chr11:12038723-12039057@chr11:12038723-12039057@chr11:12038733-12039081@chr11:12038733-12039081@chr11:12038734-…	Cardiovascular@Cardiovascular@Cardiovascular@Cardiovascular@Cardiovascular@Cardiovascular@Cardiovascular@Cardiovascular@Cardiovascular@Cardiovascular@Cardiovascular@Cardiovascular@Cardiovascular@Cardiovascular@Cardiovascular@Cardiovascular@Cardiovascular@Cardiovascular@Cardiovascular@Cardiovascular@Cardiovascular@Cardiovascular@Cardiovascular@Cardiovascular@Cardiovascular@Cardiovascular@Cardiovas…	SRX7054661@SRX7054661@SRX2207673@SRX2207673@SRX2207672@SRX2207672@SRX7054666@SRX7054666@SRX7054611@SRX7054611@SRX7054614@SRX7054614@SRX7054662@SRX7054662@SRX7054621@SRX7054621@SRX7055006@SRX7055006@SRX7054619@SRX7054619@SRX7054671@SRX7054671@SRX7055005@SRX7055005@SRX7055007@SRX7055007@SRX7055008@SRX7055008@SRX7054618@SRX7054618@SRX7054622@SRX7054622@SRX7054615@SRX7054615@SRX7054617@SRX7054617@SRX…
TRUE	chr11	44590775	44591025	CD82	108	chr11:44590386-44591137@chr11:44590406-44591150@chr11:44590510-44591044@chr11:44590518-44591076@chr11:44590584-44590930@chr11:44590636-44591051@chr11:44590646-44591063@chr11:44590673-44591076@chr11:44590675-44591088@chr11:44590679-44591069@chr11:44590682-44591049@chr11:44590683-44591056@chr11:44590685-44591077@chr11:44590685-44591088@chr11:44590685-44591113@chr11:44590687-44591100@chr11:44590688-…	Cardiovascular@Cardiovascular@Lung@Kidney@Blood@Kidney@Blood@Cardiovascular@Cardiovascular@Cardiovascular@Cardiovascular@Cardiovascular@Kidney@Cardiovascular@Cardiovascular@Cardiovascular@Cardiovascular@Cardiovascular@Cardiovascular@Lung@Cardiovascular@Blood@Cardiovascular@Blood@Cardiovascular@Blood@Cardiovascular@Cardiovascular@Cardiovascular@Cardiovascular@Cardiovascular@Others@Cardiovascular@C…	SRX2207672@SRX2207673@SRX1672133@SRX2055843@SRX4001967@SRX3346352@SRX150605@SRX7055004@SRX425264@SRX2355083@SRX4947720@SRX112016@SRX3636885@SRX7054670@SRX7054661@SRX7054671@SRX7054610@SRX7055007@SRX7055006@SRX212183@SRX7054666@SRX017912@SRX425263@SRX2837382@SRX7054609@SRX4401064@SRX7054614@SRX2355079@SRX7054611@SRX4947721@SRX7054657@SRX2404140@SRX294971@SRX2355085@SRX7054615@SRX7054619@SRX7054617…
TRUE	chr11	12038860	12039110	MICAL2	108	chr11:12038669-12039110@chr11:12038669-12039110@chr11:12038697-12039229@chr11:12038697-12039229@chr11:12038702-12039159@chr11:12038702-12039159@chr11:12038711-12039163@chr11:12038711-12039163@chr11:12038716-12039106@chr11:12038716-12039106@chr11:12038717-12039109@chr11:12038717-12039109@chr11:12038723-12039057@chr11:12038723-12039057@chr11:12038733-12039081@chr11:12038733-12039081@chr11:12038734-…	Cardiovascular@Cardiovascular@Cardiovascular@Cardiovascular@Cardiovascular@Cardiovascular@Cardiovascular@Cardiovascular@Cardiovascular@Cardiovascular@Cardiovascular@Cardiovascular@Cardiovascular@Cardiovascular@Cardiovascular@Cardiovascular@Cardiovascular@Cardiovascular@Cardiovascular@Cardiovascular@Cardiovascular@Cardiovascular@Cardiovascular@Cardiovascular@Cardiovascular@Cardiovascular@Cardiovas…	SRX7054661@SRX7054661@SRX2207673@SRX2207673@SRX2207672@SRX2207672@SRX7054666@SRX7054666@SRX7054611@SRX7054611@SRX7054614@SRX7054614@SRX7054662@SRX7054662@SRX7054621@SRX7054621@SRX7055006@SRX7055006@SRX7054619@SRX7054619@SRX7054671@SRX7054671@SRX7055005@SRX7055005@SRX7055007@SRX7055007@SRX7055008@SRX7055008@SRX7054618@SRX7054618@SRX7054622@SRX7054622@SRX7054615@SRX7054615@SRX7054617@SRX7054617@SRX…
TRUE	chr9	123687051	123689051	TRAF1	107	chr9:123688343-123688769@chr9:123688347-123688604@chr9:123688352-123688890@chr9:123688354-123688880@chr9:123688354-123689072@chr9:123688357-123688923@chr9:123688359-123688994@chr9:123688361-123688700@chr9:123688361-123688911@chr9:123688362-123688595@chr9:123688362-123689075@chr9:123688364-123688701@chr9:123688365-123689003@chr9:123688367-123688631@chr9:123688368-123688964@chr9:123688369-123688662…	Blood@Blood@Blood@Kidney@Cardiovascular@Kidney@Kidney@Blood@Blood@Blood@Cardiovascular@Blood@Cardiovascular@Blood@Cardiovascular@Blood@Blood@Blood@Blood@Blood@Blood@Others@Blood@Blood@Blood@Cardiovascular@Cardiovascular@Blood@Blood@Cardiovascular@Cardiovascular@Lung@Cardiovascular@Cardiovascular@Blood@Blood@Cardiovascular@Blood@Blood@Cardiovascular@Cardiovascular@Blood@Cardiovascular@Cardiovascul…	SRX150610@SRX150365@SRX150605@SRX3346352@SRX2207672@SRX3636885@SRX2055843@SRX150606@SRX2837382@SRX017884@SRX2207673@SRX150353@SRX7054661@SRX017871@SRX7054618@SRX150362@SRX150608@SRX150557@SRX017913@SRX150359@SRX017906@SRX5938177@SRX017879@SRX017897@SRX017891@SRX7054666@SRX2355083@SRX017895@SRX017912@SRX4947721@SRX7055006@SRX212183@SRX2355085@SRX7054657@SRX017883@SRX017865@SRX7054664@SRX017870@SRX…
TRUE	chr18	77139026	77139276	NFATC1	102	chr18:77139003-77139397@chr18:77139006-77139454@chr18:77139013-77139375@chr18:77139013-77139412@chr18:77139033-77139334@chr18:77139033-77139398@chr18:77139033-77139412@chr18:77139036-77139370@chr18:77139038-77139377@chr18:77139040-77139391@chr18:77139041-77139343@chr18:77139042-77139378@chr18:77139043-77139384@chr18:77139045-77139368@chr18:77139047-77139344@chr18:77139048-77139297@chr18:77139049-…	Cardiovascular@Cardiovascular@Cardiovascular@Others@Cardiovascular@Cardiovascular@Cardiovascular@Others@Cardiovascular@Cardiovascular@Cardiovascular@Cardiovascular@Kidney@Cardiovascular@Cardiovascular@Cardiovascular@Cardiovascular@Cardiovascular@Cardiovascular@Cardiovascular@Others@Blood@Cardiovascular@Cardiovascular@Cardiovascular@Cardiovascular@Cardiovascular@Cardiovascular@Others@Cardiovascula…	SRX2207672@SRX2207673@SRX7054666@SRX5938177@SRX2355079@SRX7054614@SRX7054617@SRX2404140@SRX7055007@SRX2355083@SRX7055005@SRX7054616@SRX2055843@SRX7054671@SRX2355085@SRX2355078@SRX7054619@SRX7054670@SRX7054661@SRX7054662@SRX2404137@SRX2837382@SRX7054611@SRX7054668@SRX7055006@SRX425264@SRX7054618@SRX7054657@SRX2404135@SRX7054610@SRX968978@SRX7054609@SRX7054622@SRX212183@SRX7054615@SRX7054613@SRX705…
[truncated: 839 more rows]

## Sheet: supplementary file 5d
RUNX2 ChIP-seq and Motif hits within BMP-biased peak sets (growth-plate chondrocytes)
MOTIF_PRED	chr	start	end	gene	num_hits	hits	sources	ID
[truncated: 1,138 more rows]

## Sheet: supplementary file 5e
RUNX2 ChIP-seq and Motif hits within TGF-biased peak sets (articular chondrocytes)
MOTIF_PRED	chr	start	end	gene	num_hits	hits	sources	ID
[truncated: 700 more rows]
