# Supplementary figures and images for: Lineage-specific differences and regulatory networks governing human chondrocyte development
Source: eLife journal article supplement (doi:10.7554/elife.79925), 2023-03-15

Figure 1-figure supplement 1

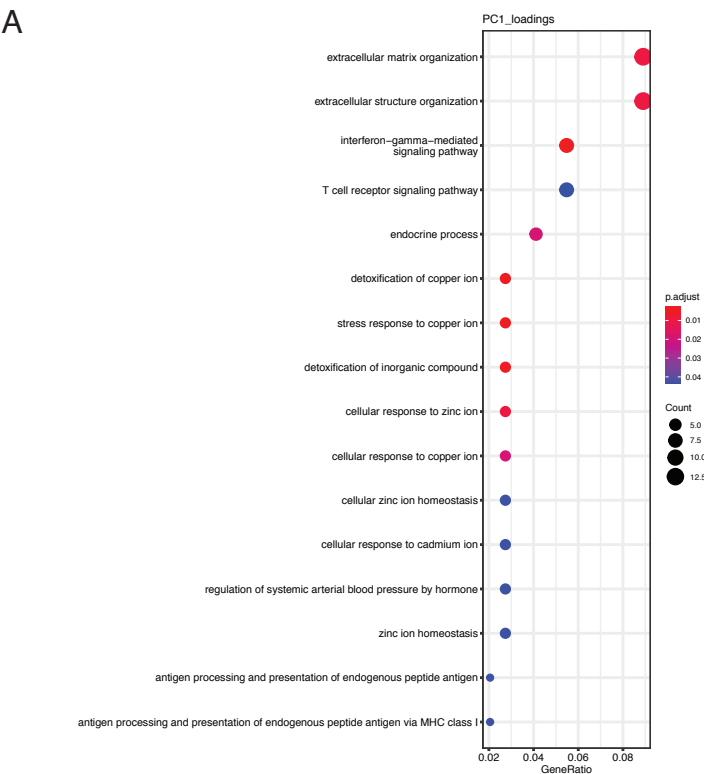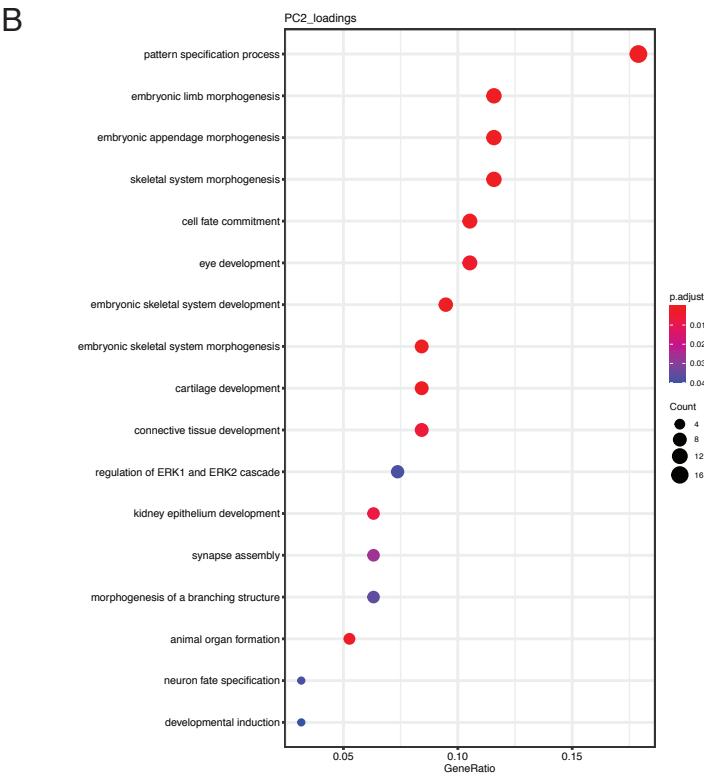

Supplement: supp [file elife_poa_e79925_Figure_1_figure_supplement_1.pdf › elife_poa_e79925_Figure_1_figure_supplement_1.pdf]

Figure 1-figure supplement 2

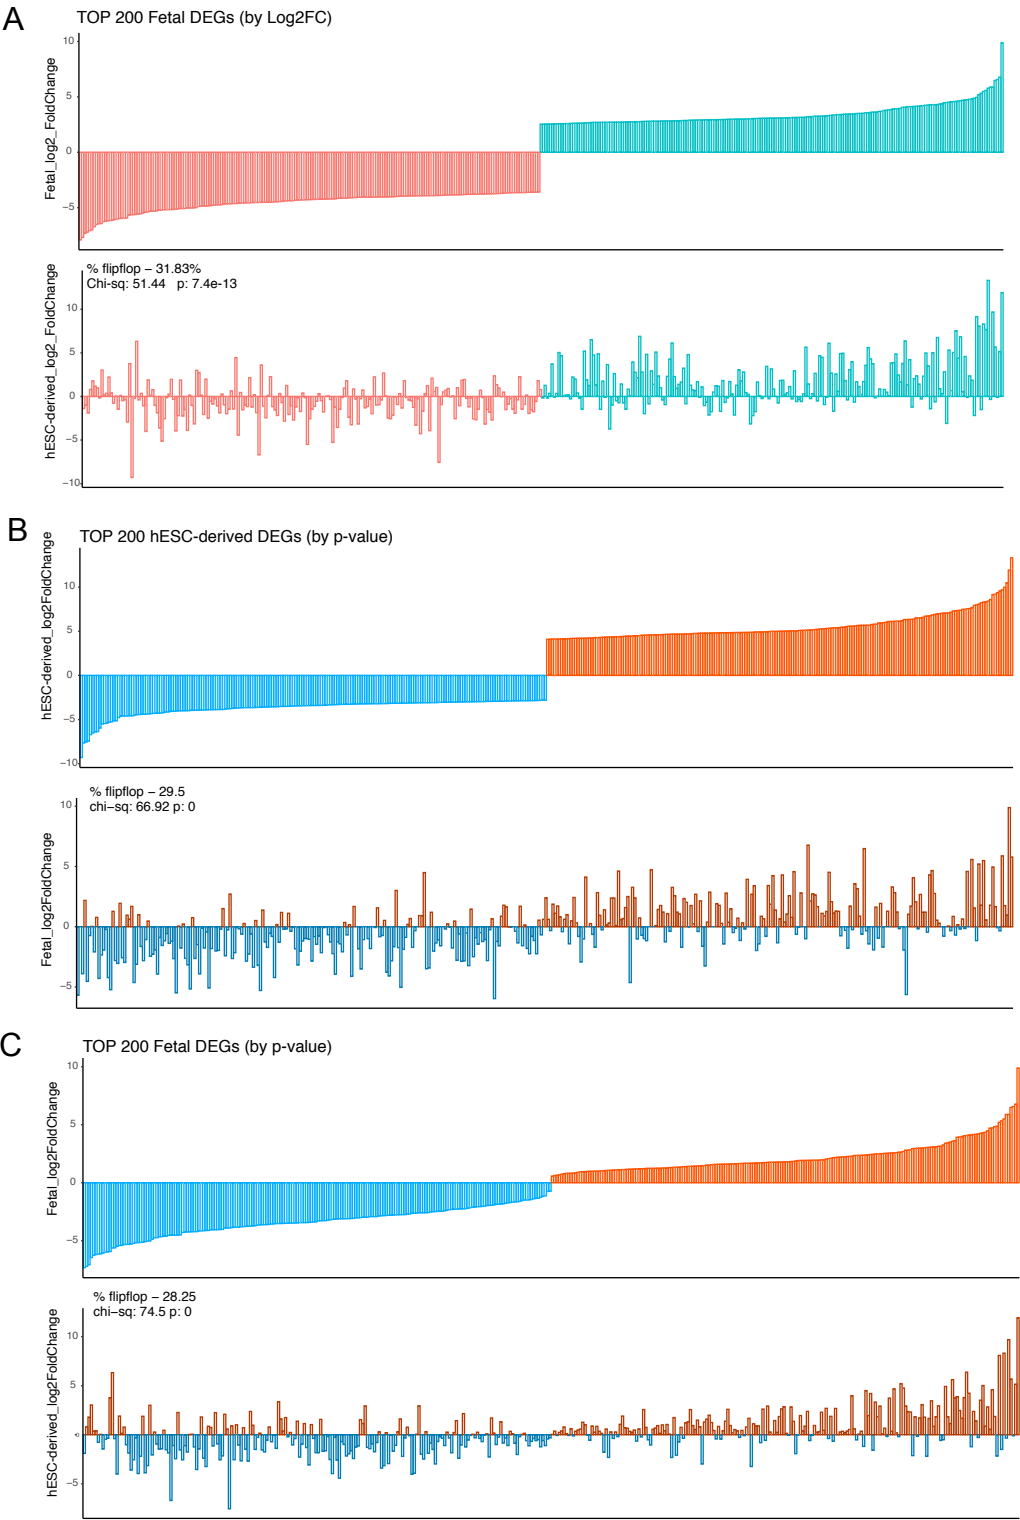

Supplement: supp [file elife_poa_e79925_Figure_1_figure_supplement_2.pdf › elife_poa_e79925_Figure_1_figure_supplement_2.pdf]

Figure 1-figure supplement 3

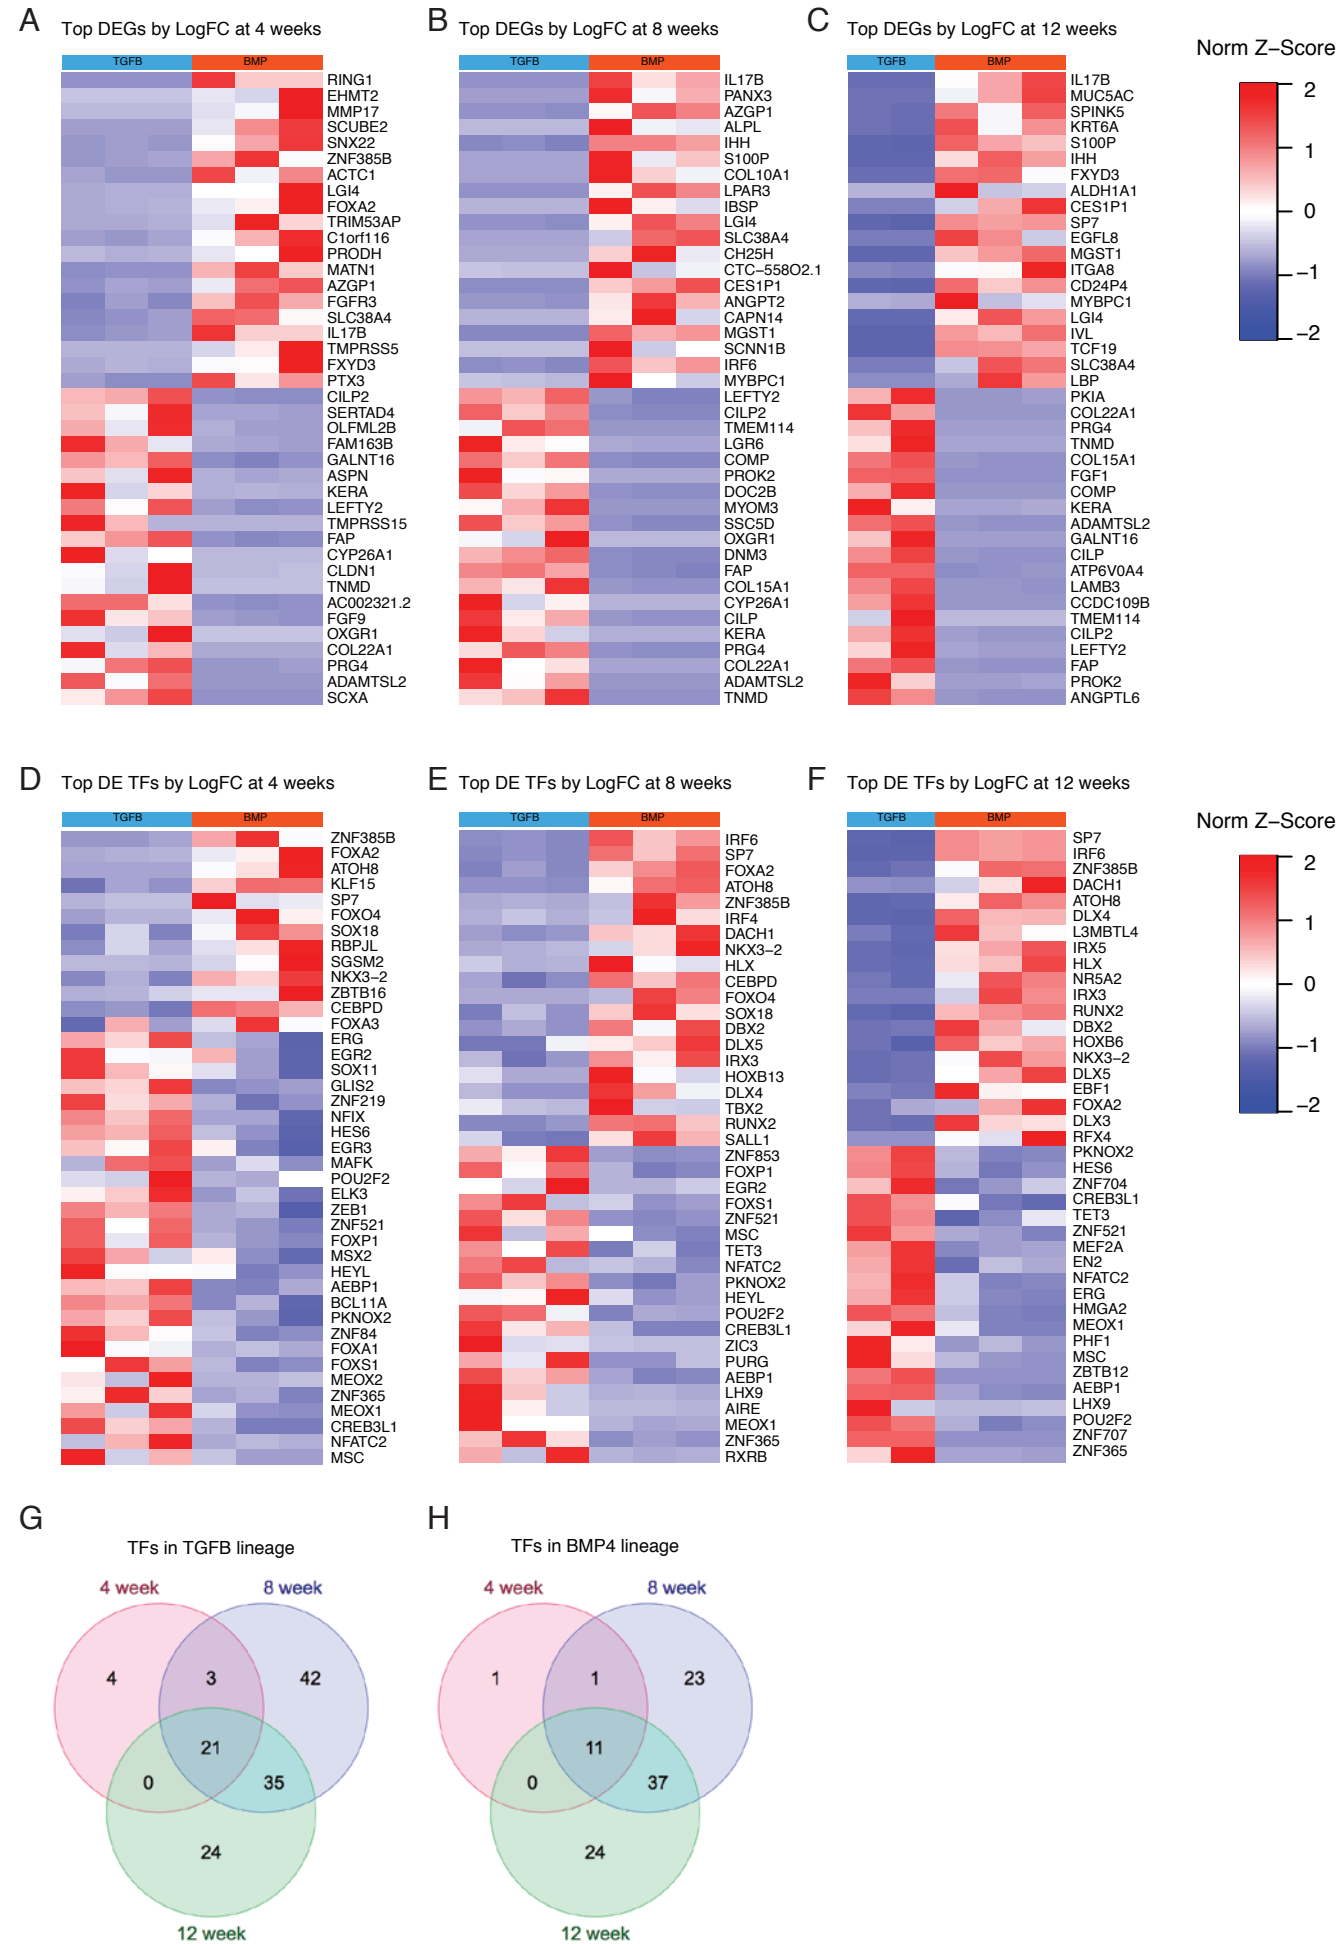

Supplement: supp [file elife_poa_e79925_Figure_1_figure_supplement_3.pdf › elife_poa_e79925_Figure_1_figure_supplement_3.pdf]

Figure 1-figure supplement 4

A

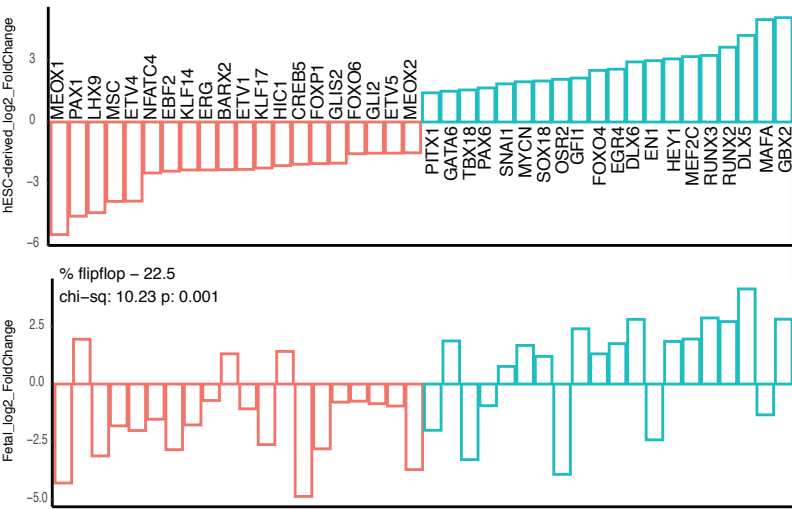

B

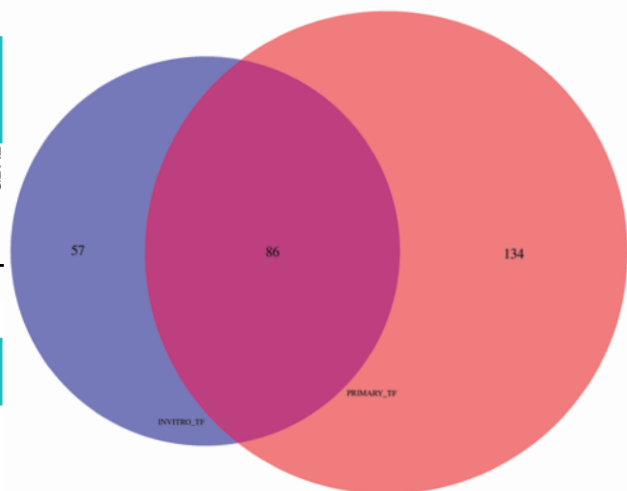

C

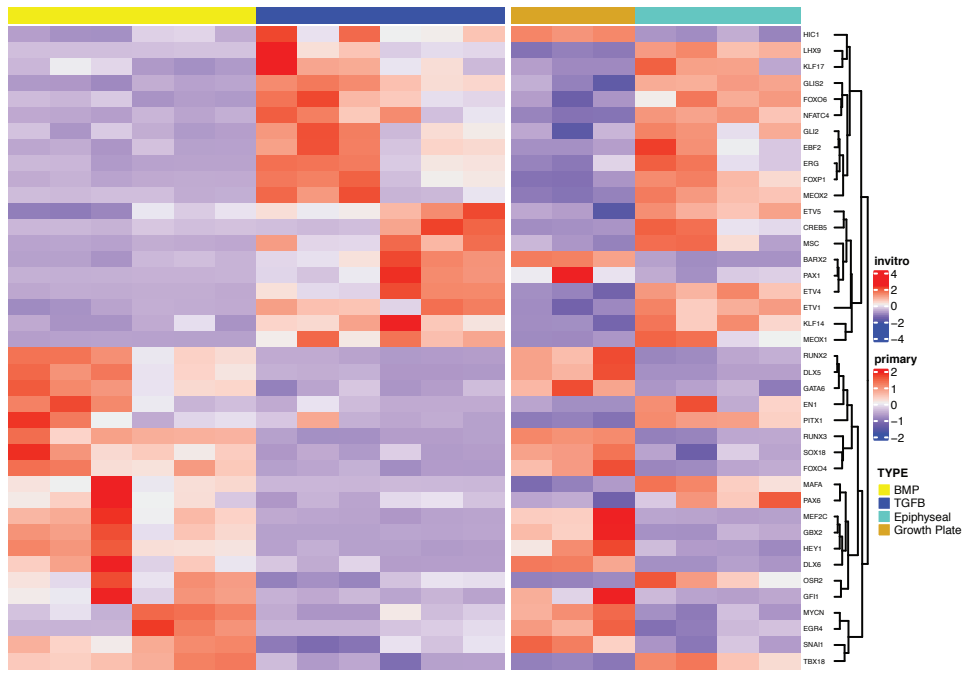

Supplement: supp [file elife_poa_e79925_Figure_1_figure_supplement_4.pdf › elife_poa_e79925_Figure_1_figure_supplement_4.pdf]

Figure 3-figure supplement 1

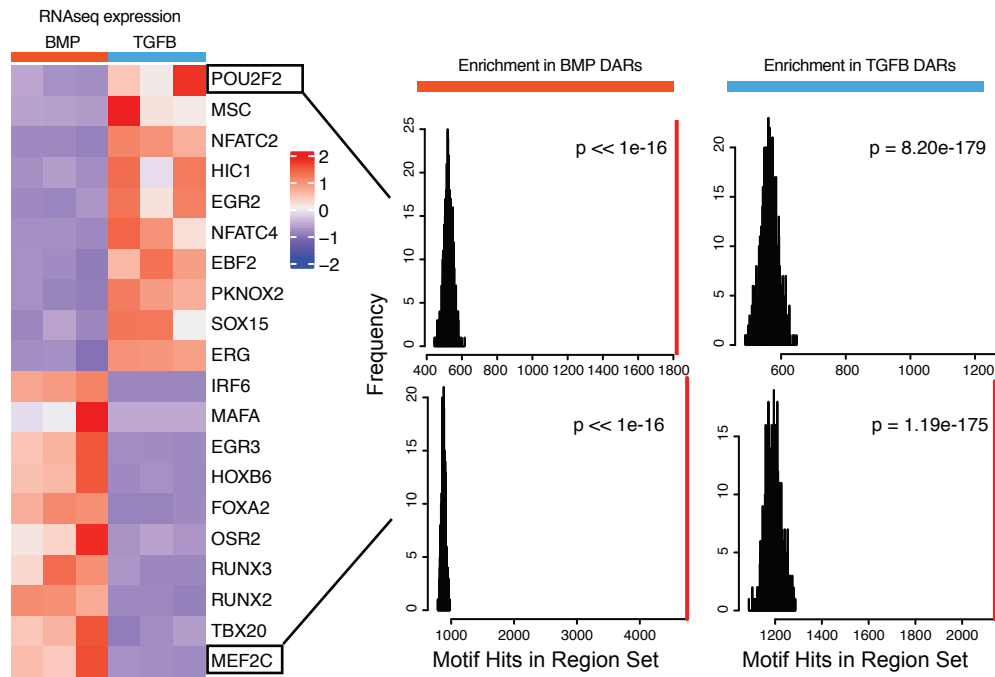

Supplement: supp [file elife_poa_e79925_Figure_3_figure_supplement_1.pdf › elife_poa_e79925_Figure_3_figure_supplement_1.pdf]

Figure 3-figure supplement 2

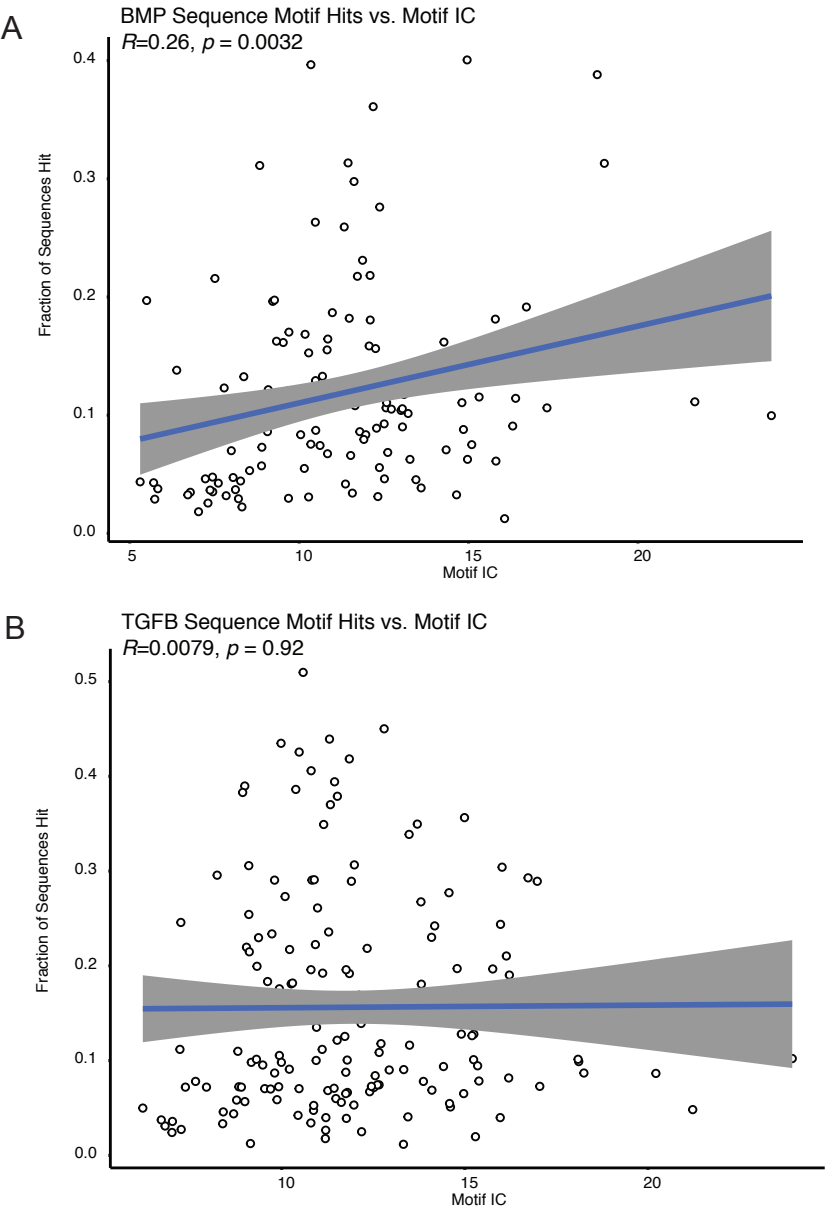

Supplement: supp [file elife_poa_e79925_Figure_3_figure_supplement_2.pdf › elife_poa_e79925_Figure_3_figure_supplement_2.pdf]

Figure 6-figure supplement 1

A

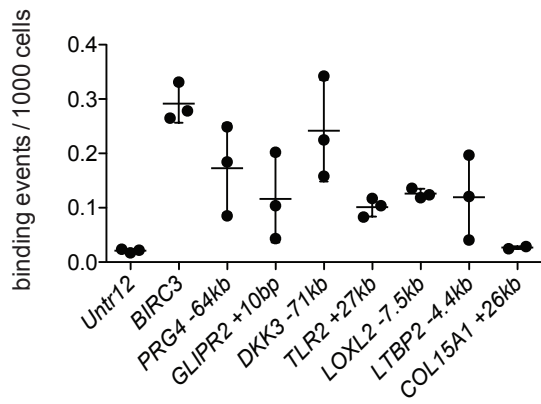

B

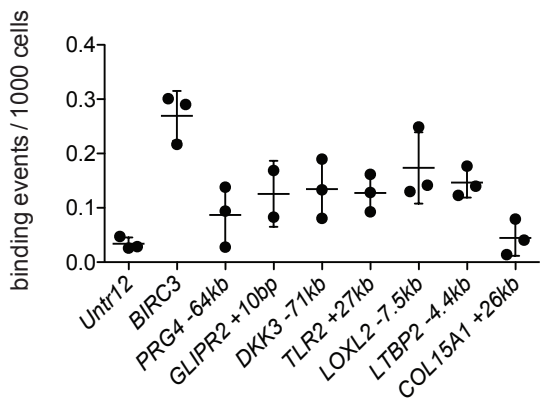

C

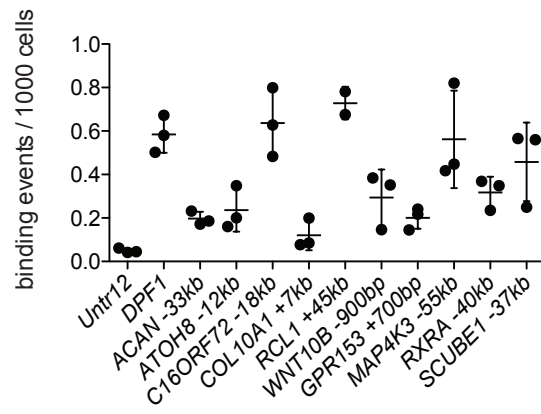

Supplement: supp [file elife_poa_e79925_Figure_6_figure_supplement_1.pdf › elife_poa_e79925_Figure_6_figure_supplement_1.pdf]
